# Supplementary material for: Conceptualizing patient-centered care for substance use disorder treatment: findings from a systematic scoping review
Source: PubMed Central journal article supplement (PMC6739978; doi:10.1186/s13011-019-0227-0), 2019-09-11
Supplement: 13011_2019_227_MOESM2_ESM.pdf [file 13011_2019_227_MOESM2_ESM.pdf]

## Appendix A

### Database-Specific Search Strategies

Table A1. Medline (Ovid) search strategy

| Search term/line number | Conceptual term of interest | Other keywords/synonyms and notes                                                                                                                                                                                                                                                                                                                                                                                                                                                                                        | Search term entered into Ovid-Medline               | Number of hits |
|-------------------------|-----------------------------|--------------------------------------------------------------------------------------------------------------------------------------------------------------------------------------------------------------------------------------------------------------------------------------------------------------------------------------------------------------------------------------------------------------------------------------------------------------------------------------------------------------------------|-----------------------------------------------------|----------------|
| 1                       | Substance-Related Disorders | exp substance-related disorders/ or exp alcohol-related disorders/ or exp amphetamine-related disorders/ or exp cocaine-related disorders/ or exp drug overdose/ or exp heroin dependence/ or exp inhalant abuse/ or exp marijuana abuse/ or exp neonatal abstinence syndrome/ or exp opioid-related disorders/ or exp phencyclidine abuse/ or exp psychoses, substance-induced/ or exp substance abuse, intravenous/ or exp substance abuse, oral/ or exp substance withdrawal syndrome/ or exp "tobacco use disorder"/ | exp Substance-Related Disorders                     | 258462         |
| 2                       | Street Drugs                | exp street drugs/ or exp crack cocaine/                                                                                                                                                                                                                                                                                                                                                                                                                                                                                  | exp Street Drugs                                    | 11263          |
| 3                       | Substance abuser            | substance abusing                                                                                                                                                                                                                                                                                                                                                                                                                                                                                                        | substance abus*                                     | 49532          |
| 4                       | Substance dependent         | Substance dependency                                                                                                                                                                                                                                                                                                                                                                                                                                                                                                     | substance dependen*                                 | 2720           |
| 5                       | Substance misuse            | Substance misusers, substance misusing                                                                                                                                                                                                                                                                                                                                                                                                                                                                                   | substance misus*                                    | 2150           |
| 6                       | Problematic substance use   | problematic substance users, people with problematic substance use, problematic substance using                                                                                                                                                                                                                                                                                                                                                                                                                          | Problematic substance adj2 (use* or usage or using) | 254            |

|    |                         |                                                                                                                                                                                               |                                                                                       |       |
|----|-------------------------|-----------------------------------------------------------------------------------------------------------------------------------------------------------------------------------------------|---------------------------------------------------------------------------------------|-------|
| 7  | People who inject drugs | PWID                                                                                                                                                                                          | (people who inject drug* or PWID)                                                     | 1740  |
| 8  | Injection drug use      | IDU, injection drug users                                                                                                                                                                     | injection drug "(use or user or usage or using)" or IDU                               | 2794  |
| 9  | People who use drugs    | PWUD                                                                                                                                                                                          | "people who use drugs" or PWUD                                                        | 343   |
| 10 | Illicit substance use   | Illicit substance using, illicit substance use, illegal substance users, illegal substance using, illegal substance use, street substance users, street substance using, street substance use | (illicit or street or illegal) adj2 (drug or substance) adj2 (use* or usage or using) | 5848  |
| 11 | opiod dependence        | opiod dependent, opiod dependency, opiod addiction, opiod abuse, opiod misuse, opiod problem                                                                                                  | opiod adj2 (addict* or abus* or dependen* or misus* or problem* or disorder*)         | 15537 |
| 12 | opiate dependence       | opiate dependent, opiate dependency, opiate addiction, opiate abuse, opiate misuse, opiate problem                                                                                            | opiate adj2 (addict* or abus* or dependen* or misus* or problem* or disorder*)        | 3475  |
| 13 | narcotic dependence     | narcotic dependent, narcotic dependency, narcotic addiction, narcotic abuse, narcotic misuse, narcotic problem                                                                                | narcotic adj2 (addict* or abus* or dependen* or misus* or problem* or disorder*)      | 1279  |
| 14 | heroin                  | None                                                                                                                                                                                          | heroin                                                                                | 17865 |
| 15 | stimulant use disorder  |                                                                                                                                                                                               | "stimulant use disorder"                                                              | 40    |
| 16 | exp crack cocaine       | MeSH exploded; this is a separate Mesh from cocaine-related disorders and reflects addiction to crack cocaine                                                                                 | exp crack cocaine                                                                     | 1343  |

|    |                              |                                                                                                                                 |                                                                                                                                  |        |
|----|------------------------------|---------------------------------------------------------------------------------------------------------------------------------|----------------------------------------------------------------------------------------------------------------------------------|--------|
| 17 | exp cocaine smoking          | Mesh exploded; this is a separate Mesh from cocaine-related disorders and crack cocaine                                         | exp cocaine smoking                                                                                                              | 4      |
| 18 | cocaine dependence           | cocaine dependent, cocaine dependency, cocaine addiction, cocaine abuse, cocaine dependence, cocaine misuse, cocaine problem    | ((cocaine or crack) adj2 (addict* or abus* or dependen* or misus* or problem* or disorder*))                                     | 11806  |
| 19 | amphetamine dependence       | amphetamine dependent, dependency, addiction, abuse, dependence, misuse, problem; crystal methamphetamine...; crystal meth....; | (amphetamine or crystal methamphetamine or crystal meth) adj1 (addict* or abus* or dependen* or misus* or problem* or disorder*) | 592    |
| 20 | alcohol dependence           | alcohol dependent, alcohol dependency, alcohol addiction, alcohol abuse, alcohol misuse, alcohol problem                        | alcohol adj2 (addict* or abus* or dependen* or misus* or problem* or disorder*)                                                  | 50104  |
| 21 | cannabis dependence          | cannabis dependent, cannabis dependency, cannabis abuse, cannabis addiction                                                     | cannabis adj2 (addict* or abus* or dependen* or disorder*)                                                                       | 1917   |
| 22 | tobacco dependence           | tobacco or nicotine dependent, tobacco or nicotine dependency, smoking cessation                                                | (tobacco or nicotine or smok*) adj2 (dependen* or disorder* or cessation)                                                        | 45598  |
| 23 | Diagnosis, Dual (Psychiatry) | MeSH unexploded                                                                                                                 | Diagnosis, Dual (Psychiatry)                                                                                                     | 3372   |
| 24 |                              | (all problematic substance use related terms)                                                                                   | 1 or 2 or 3 or 4 or 5 or 6 or 7 or 8 or 9 or                                                                                     | 337412 |

|    |                                                                 |                                                                                                                                                                                                                                                                                                                               |                                                                                                                                          |       |
|----|-----------------------------------------------------------------|-------------------------------------------------------------------------------------------------------------------------------------------------------------------------------------------------------------------------------------------------------------------------------------------------------------------------------|------------------------------------------------------------------------------------------------------------------------------------------|-------|
|    |                                                                 |                                                                                                                                                                                                                                                                                                                               | 10 or 11 or 12 or 13 or 14 or 15 or 16 or 17 or 18 or 19 or 20 or 21 or 22 or 23                                                         |       |
| 25 | exp Patient-Centered Care                                       | MeSH Exploded includes all sub-categories                                                                                                                                                                                                                                                                                     | exp Patient-Centered Care                                                                                                                | 16653 |
| 26 | Patient centered care                                           | patient centered treatment, patient centered therapy, Client centered care, client centered treatment, client centered therapy, Person-Centered Care, person centered treatment, person centered therapy                                                                                                                      | ((patient or client or person) adj1 cent?red adj1 (care or treatment* or therap*))                                                       | 20713 |
| 27 | Patient focused care                                            | Client focused care, person focused care                                                                                                                                                                                                                                                                                      | ((patient or client or person) adj1 focus?ed adj1 (care or treatment* or therap*))                                                       | 425   |
| 28 | Patient participation in treatment planning, process, decisions | Patient/client autonomy in decision making/care/practice/treatment/planning<br>Patient/client involvement in decision making/care/practice/treatment/planning<br>Patient/client control in decision making/care/practice/treatment/planning<br>Patient/client empowerment in decision making/care/practice/treatment/planning | (patient or client) adj1 (autonom* or involve* or control or empower*) adj1 (decision making or care or practic* or treatment* or plan*) | 126   |
| 29 | Collaborative care                                              | Collaborative practices, collaborative treatment, collaborative care planning                                                                                                                                                                                                                                                 | collaborative adj1 (care or practic* or treatment* or plan*)                                                                             | 3803  |
| 30 | Shared decision-making                                          | shared decision making, joint decision making                                                                                                                                                                                                                                                                                 | (shared or joint or collaborative) adj2 decision making                                                                                  | 6279  |
| 31 | Therapeutic alliance                                            | No mesh term, as a subject heading crossed with substance related disorders it results in 153 hits.                                                                                                                                                                                                                           | therapeutic alliance                                                                                                                     | 9027  |

|    |                                         |                                                                                                  |                                                                                                                                         |      |
|----|-----------------------------------------|--------------------------------------------------------------------------------------------------|-----------------------------------------------------------------------------------------------------------------------------------------|------|
| 32 | Relational practice                     |                                                                                                  | relational practic*                                                                                                                     | 44   |
| 33 | Enhanced patient-provider relationship  | physician/doctor/nurse/professional/provider-patient/client alliance/empowerment/support/enhance | (physician or doctor or nurse or professional or provider) adj1 (patient or client) adj1 (enhanc* or alliance* or empower* or support*) | 304  |
| 34 | Enhanced patient-provider communication | physician/doctor/nurse/professional/provider-patient/client communication                        | (physician or doctor or nurse or professional or provider) adj1 (patient or client) adj1 communicat*                                    | 4230 |
| 35 | Holistic Nursing                        | holistic nursing care                                                                            | Holistic Nursing/                                                                                                                       | 3135 |
| 36 | Trauma informed care                    | trauma-informed, trauma informed, trauma centered with care, approach, treatment or therapy      | trauma adj1 (cent?red or informed) adj1 (care or approach or treatment* or therap*)                                                     | 263  |
| 37 | Culturally safe care                    | culturally sensitive care                                                                        | cultural* adj1 (safe or sensitive) adj1 (care or approach or treatment* or therap*)                                                     | 395  |
| 39 | Family Systems Nursing                  |                                                                                                  | Family Systems Nursing                                                                                                                  | 64   |
| 39 | Expert patient program                  | expert patient programme                                                                         | expert patient program*                                                                                                                 | 27   |

|    |  |                                           |                                                                                                    |            |
|----|--|-------------------------------------------|----------------------------------------------------------------------------------------------------|------------|
| 40 |  | (All patient-centered care related terms) | 25 or 26 or 27 or 28<br>or 29 or 30 or 31 or<br>32 or 33 or 34 or 35<br>or 36 or 37 or 38 or<br>39 | 40281      |
| 41 |  |                                           | <b>24 and 40</b>                                                                                   | <b>896</b> |

Table A2. Embase (Ovid) search strategy

| Search term/line number | Conceptual term of interest | Other keywords/synonyms and notes                                                                                                                                                                                                                                                                                                                                                                                                                                                                                        | Search term entered into Ovid-Embase | Number of hits |
|-------------------------|-----------------------------|--------------------------------------------------------------------------------------------------------------------------------------------------------------------------------------------------------------------------------------------------------------------------------------------------------------------------------------------------------------------------------------------------------------------------------------------------------------------------------------------------------------------------|--------------------------------------|----------------|
| 1                       | Substance-Related Disorders | exp substance-related disorders/ or exp alcohol-related disorders/ or exp amphetamine-related disorders/ or exp cocaine-related disorders/ or exp drug overdose/ or exp heroin dependence/ or exp inhalant abuse/ or exp marijuana abuse/ or exp neonatal abstinence syndrome/ or exp opioid-related disorders/ or exp phencyclidine abuse/ or exp psychoses, substance-induced/ or exp substance abuse, intravenous/ or exp substance abuse, oral/ or exp substance withdrawal syndrome/ or exp "tobacco use disorder"/ | exp Drug Dependence/                 | 217291         |
| 2                       | Street Drugs                | exp street drugs/ or exp crack cocaine/                                                                                                                                                                                                                                                                                                                                                                                                                                                                                  | exp Street drug/                     | 3375           |
| 3                       | Substance abuser            | substance abusing                                                                                                                                                                                                                                                                                                                                                                                                                                                                                                        | substance abus*                      | 65379          |
| 4                       | Substance dependent         | Substance dependency                                                                                                                                                                                                                                                                                                                                                                                                                                                                                                     | substance dependen*                  | 3853           |
| 5                       | Substance misuse            | Substance misusers, substance misusing                                                                                                                                                                                                                                                                                                                                                                                                                                                                                   | substance misus*                     | 3235           |

|    |                           |                                                                                                                                                                                               |                                                                                       |       |
|----|---------------------------|-----------------------------------------------------------------------------------------------------------------------------------------------------------------------------------------------|---------------------------------------------------------------------------------------|-------|
| 6  | Problematic substance use | problematic substance users, people with problematic substance use, problematic substance using                                                                                               | Problematic substance adj2 (use* or usage or using)                                   | 321   |
| 7  | People who inject drugs   | PWID                                                                                                                                                                                          | (people who inject drug* or PWID)                                                     | 2225  |
| 8  | Injection drug use        | IDU, injection drug users                                                                                                                                                                     | injection drug "(use or user or usage or using)" or IDU                               | 3877  |
| 9  | People who use drugs      | PWUD                                                                                                                                                                                          | "people who use drugs" or PWUD                                                        | 443   |
| 10 | Illicit substance use     | Illicit substance using, illicit substance use, illegal substance users, illegal substance using, illegal substance use, street substance users, street substance using, street substance use | (illicit or street or illegal) adj2 (drug or substance) adj2 (use* or usage or using) | 7836  |
| 11 | opioid dependence         | opioid dependent, opioid dependency, opioid addiction, opioid abuse, opioid misuse, opioid problem                                                                                            | opioid adj2 (addict* or abus* or dependen* or misus* or problem* or disorder*)        | 10903 |
| 12 | opiate dependence         | opiate dependent, opiate dependency, opiate addiction, opiate abuse, opiate misuse, opiate problem                                                                                            | opiate adj2 (addict* or abus* or dependen* or misus* or problem* or disorder*)        | 17604 |
| 13 | narcotic dependence       | narcotic dependent, narcotic dependency, narcotic addiction, narcotic abuse, narcotic misuse, narcotic problem                                                                                | narcotic adj2 (addict* or abus* or dependen* or misus* or problem* or disorder*)      | 2539  |



|    |                        |                                                                                                                                 |                                                                                                                                  |       |
|----|------------------------|---------------------------------------------------------------------------------------------------------------------------------|----------------------------------------------------------------------------------------------------------------------------------|-------|
| 14 | heroin                 | None                                                                                                                            | heroin                                                                                                                           | 21066 |
| 15 | stimulant use disorder |                                                                                                                                 | "stimulant use disorder"                                                                                                         | 62    |
| 16 | exp crack cocaine      | MeSH exploded; this is a separate Mesh from cocaine-related disorders and reflects addiction to crack cocaine                   | exp crack cocaine                                                                                                                | 52870 |
| 17 | exp cocaine smoking    | Mesh exploded; this is a separate Mesh from cocaine-related disorders and crack cocaine                                         | "cocaine smoking"                                                                                                                | 126   |
| 18 | cocaine dependence     | cocaine dependent, cocaine dependency, cocaine addiction, cocaine abuse, cocaine dependence, cocaine misuse, cocaine problem    | ((cocaine or crack) adj2 (addict* or abus* or dependen* or misus* or problem* or disorder*))                                     | 16798 |
| 19 | amphetamine dependence | amphetamine dependent, dependency, addiction, abuse, dependence, misuse, problem; crystal methamphetamine...; crystal meth....; | (amphetamine or crystal methamphetamine or crystal meth) adj1 (addict* or abus* or dependen* or misus* or problem* or disorder*) | 1007  |
| 20 | alcohol dependence     | alcohol dependent, alcohol dependency, alcohol addiction, alcohol abuse, alcohol miuse, alcohol problem                         | alcohol adj2 (addict* or abus* or dependen* or misus* or problem* or disorder*)                                                  | 78110 |
| 21 | cannabis dependence    | cannabis dependent, cannabis dependency, cannabis abuse, cannabis addiction                                                     | cannabis adj2 (addict* or abus* or                                                                                               | 9686  |

|    |                              |                                                                                                                                                                                                          |                                                                                                                               |        |
|----|------------------------------|----------------------------------------------------------------------------------------------------------------------------------------------------------------------------------------------------------|-------------------------------------------------------------------------------------------------------------------------------|--------|
|    |                              |                                                                                                                                                                                                          | dependen* or disorder*)                                                                                                       |        |
| 22 | tobacco dependence           | tobacco or nicotine dependent, tobacco or nicotine dependency, smoking cessation                                                                                                                         | (tobacco or nicotine or smok*) adj2 (dependen* or disorder* or cessation)                                                     | 72203  |
| 23 | Diagnosis, Dual (Psychiatry) |                                                                                                                                                                                                          | dual diagnosis                                                                                                                | 2515   |
| 24 |                              | (All problematic substance use related terms)                                                                                                                                                            | 1 or 2 or 3 or 4 or 5 or 6 or 7 or 8 or 9 or 10 or 11 or 12 or 13 or 14 or 15 or 16 or 17 or 18 or 19 or 20 or 21 or 22 or 23 | 402117 |
| 25 | exp Patient-Centered Care    |                                                                                                                                                                                                          | patient-centered care                                                                                                         | 4909   |
| 26 | Patient centered care        | patient centered treatment, patient centered therapy, Client centered care, client centered treatment, client centered therapy, Person-Centered Care, person centered treatment, person centered therapy | ((patient or client or person) adj1 cent?red adj1 (care or treatment* or therap*))                                            | 9174   |
| 27 | Patient focused care         | Client focused care, person focused care                                                                                                                                                                 | ((patient or client or person) adj1 focus?ed adj1 (care or treatment* or therap*))                                            | 516    |
| 28 | Patient participation in     | Patient/client autonomy in decision making/care/practice/treatment/planning<br>Patient/client involvement in decision                                                                                    | (patient or client) adj1 (autonom* or involve* or control or empower*) adj1                                                   | 157    |

|    |                                         |                                                                                                                                                                                                         |                                                                                                                                         |      |
|----|-----------------------------------------|---------------------------------------------------------------------------------------------------------------------------------------------------------------------------------------------------------|-----------------------------------------------------------------------------------------------------------------------------------------|------|
|    | treatment planning, process, decisions  | making/care/practice/treatment/planning<br>Patient/client control in decision making/care/practice/treatment/planning<br>Patient/client empowerment in decision making/care/practice/treatment/planning | (decision making or care or practic* or treatment* or plan*)                                                                            |      |
| 29 | Collaborative care                      | Collaborative practices, collaborative treatment, collaborative care planning                                                                                                                           | collaborative adj1 (care or practic* or treatment* or plan*)                                                                            | 4994 |
| 30 | Shared decision-making                  | shared decision making, joint decision making                                                                                                                                                           | (shared or joint or collaborative) adj2 decision making                                                                                 | 9413 |
| 31 | Therapeutic alliance                    |                                                                                                                                                                                                         | therapeutic alliance                                                                                                                    | 3116 |
| 32 | Relational practice                     |                                                                                                                                                                                                         | relational practic*                                                                                                                     | 47   |
| 33 | Enhanced patient-provider relationship  | physician/doctor/nurse/professional/provider-patient/client<br>alliance/empowerment/support/enhance                                                                                                     | (physician or doctor or nurse or professional or provider) adj1 (patient or client) adj1 (enhanc* or alliance* or empower* or support*) | 371  |
| 34 | Enhanced patient-provider communication | physician/doctor/nurse/professional/provider-patient/client communication                                                                                                                               | (physician or doctor or nurse or professional or provider) adj1 (patient or client) adj1 communicat*                                    | 6051 |
| 35 | Holistic Nursing                        | holistic nursing care                                                                                                                                                                                   | Holistic Nursing /                                                                                                                      | 3117 |

|    |                        |                                                                                             |                                                                                        |       |
|----|------------------------|---------------------------------------------------------------------------------------------|----------------------------------------------------------------------------------------|-------|
| 36 | Trauma informed care   | trauma-informed, trauma informed, trauma centered with care, approach, treatment or therapy | trauma adj1 (cent?red or informed) adj1 (care or approach or treatment* or therap*)    | 294   |
| 37 | Culturally safe care   | culturally sensitive care                                                                   | cultural* adj1 (safe or sensitive) adj1 (care or approach or treatment* or therap*)    | 479   |
| 39 | Family Systems Nursing |                                                                                             | Family Systems Nursing                                                                 | 58    |
| 39 | Expert patient program | expert patient programme                                                                    | expert patient program*                                                                | 42    |
| 40 |                        | (All patient-centered care related terms)                                                   | 25 or 26 or 27 or 28 or 29 or 30 or 31 or 32 or 33 or 34 or 35 or 36 or 37 or 38 or 39 | 36068 |
| 41 |                        |                                                                                             | <b>24 and 40</b>                                                                       | 1072  |

Table A3. PsycINFO (EBSCO) search strategy

| Search term/line number | Conceptual term of interest | Other keywords/synonyms and notes                                                                                                                                                                                                                                                                                                                                                                                                                                                                                        | Search term entered into PsycINFO (EBSCO) | Number of hits |
|-------------------------|-----------------------------|--------------------------------------------------------------------------------------------------------------------------------------------------------------------------------------------------------------------------------------------------------------------------------------------------------------------------------------------------------------------------------------------------------------------------------------------------------------------------------------------------------------------------|-------------------------------------------|----------------|
| 1                       | Substance-Related Disorders | exp substance-related disorders/ or exp alcohol-related disorders/ or exp amphetamine-related disorders/ or exp cocaine-related disorders/ or exp drug overdose/ or exp heroin dependence/ or exp inhalant abuse/ or exp marijuana abuse/ or exp neonatal abstinence syndrome/ or exp opioid-related disorders/ or exp phencyclidine abuse/ or exp psychoses, substance-induced/ or exp substance abuse, intravenous/ or exp substance abuse, oral/ or exp substance withdrawal syndrome/ or exp "tobacco use disorder"/ | DE "Substance Use Disorder"               | 5661           |
| 2                       | Street Drugs                | exp street drugs/ or exp crack cocaine/                                                                                                                                                                                                                                                                                                                                                                                                                                                                                  | street drug*                              | 3700           |
| 3                       | Substance abuser            | substance abusing                                                                                                                                                                                                                                                                                                                                                                                                                                                                                                        | substance abus*                           | 9890           |
| 4                       | Substance dependent         | Substance dependency                                                                                                                                                                                                                                                                                                                                                                                                                                                                                                     | substance dependen*                       | 3955           |
| 5                       | Substance misuse            | Substance misusers, substance misusing                                                                                                                                                                                                                                                                                                                                                                                                                                                                                   | substance misus*                          | 7881           |

|    |                           |                                                                                                                                                                                               |                                                                                   |      |
|----|---------------------------|-----------------------------------------------------------------------------------------------------------------------------------------------------------------------------------------------|-----------------------------------------------------------------------------------|------|
| 6  | Problematic substance use | problematic substance users, people with problematic substance use, problematic substance using                                                                                               | problematic substance n2 (use* or usage or using)                                 | 353  |
| 7  | People who inject drugs   | PWID                                                                                                                                                                                          | (people who inject drug* or PWID)                                                 | 903  |
| 8  | Injection drug use        | IDU, injection drug users                                                                                                                                                                     | injection drug "(use or user or usage or using)" or IDU                           | 2128 |
| 9  | People who use drugs      | PWUD                                                                                                                                                                                          | "people who use drugs" or PWUD                                                    | 245  |
| 10 | Illicit substance use     | Illicit substance using, illicit substance use, illegal substance users, illegal substance using, illegal substance use, street substance users, street substance using, street substance use | (illicit or street or illegal) n2 (drug or substance) n2 (use* or usage or using) | 6874 |
| 11 | opioid dependence         | opioid dependent, opioid dependency, opioid addiction, opioid abuse, opioid misuse, opioid problem                                                                                            | opioid n2 (addict* or abus* or dependen* or misus* or problem* or disorder*)      | 7697 |
| 12 | opiate dependence         | opiate dependent, opiate dependency, opiate addiction, opiate abuse, opiate misuse, opiate problem                                                                                            | opiate n2 (addict* or abus* or dependen* or misus* or problem* or disorder*)      | 2872 |
| 13 | narcotic dependence       | narcotic dependent, narcotic dependency, narcotic addiction, narcotic abuse, narcotic misuse, narcotic problem                                                                                | narcotic n2 (addict* or abus* or dependen* or misus* or problem* or disorder*)    | 965  |

|    |                        |                                                                                                                                 |                                                                                                                                |       |
|----|------------------------|---------------------------------------------------------------------------------------------------------------------------------|--------------------------------------------------------------------------------------------------------------------------------|-------|
| 14 | heroin                 | None                                                                                                                            | heroin                                                                                                                         | 9769  |
| 15 | stimulant use disorder |                                                                                                                                 | "stimulant use disorder"                                                                                                       | 41    |
| 16 | exp crack cocaine      | MeSH exploded; this is a separate Mesh from cocaine-related disorders and reflects addiction to crack cocaine                   | DE "Crack Cocaine"                                                                                                             | 959   |
| 17 | exp cocaine smoking    | Mesh exploded; this is a separate Mesh from cocaine-related disorders and crack cocaine                                         | "cocaine smoking"                                                                                                              | 43    |
| 18 | cocaine dependence     | cocaine dependent, cocaine dependency, cocaine addiction, cocaine abuse, cocaine dependence, cocaine misuse, cocaine problem    | ((cocaine or crack) n2 (addict* or abus* or dependen* or misus* or problem* or disorder*))                                     | 8439  |
| 19 | amphetamine dependence | amphetamine dependent, dependency, addiction, abuse, dependence, misuse, problem; crystal methamphetamine...; crystal meth....; | (amphetamine or crystal methamphetamine or crystal meth) n1 (addict* or abus* or dependen* or misus* or problem* or disorder*) | 1921  |
| 20 | alcohol dependence     | alcohol dependent, alcohol dependency, alcohol addiction, alcohol abuse, alcohol miuse, alcohol problem                         | alcohol n2 (addict* or abus* or dependen* or misus* or problem* or disorder*)                                                  | 65796 |
| 21 | cannabis dependence    | cannabis dependent, cannabis dependency, cannabis abuse, cannabis addiction                                                     | cannabis n2 (addict* or abus* or dependen* or disorder*)                                                                       | 2196  |

|    |                                                                 |                                                                                                                                                                                                          |                                                                                                                               |        |
|----|-----------------------------------------------------------------|----------------------------------------------------------------------------------------------------------------------------------------------------------------------------------------------------------|-------------------------------------------------------------------------------------------------------------------------------|--------|
| 22 | tobacco dependence                                              | tobacco or nicotine dependent, tobacco or nicotine dependency, smoking cessation                                                                                                                         | (tobacco or nicotine or smok*) n2 (dependen* or disorder* or cessation)                                                       | 22659  |
| 23 | Diagnosis, Dual (Psychiatry)                                    |                                                                                                                                                                                                          | DE "Dual Diagnosis"                                                                                                           | 1971   |
| 24 |                                                                 | (All problematic substance use related terms)                                                                                                                                                            | 1 or 2 or 3 or 4 or 5 or 6 or 7 or 8 or 9 or 10 or 11 or 12 or 13 or 14 or 15 or 16 or 17 or 18 or 19 or 20 or 21 or 22 or 23 | 172693 |
| 25 | exp Patient-Centered Care                                       |                                                                                                                                                                                                          | DE "Client Centered Therapy"                                                                                                  | 3092   |
| 26 | Patient centered care                                           | patient centered treatment, patient centered therapy, Client centered care, client centered treatment, client centered therapy, Person-Centered Care, person centered treatment, person centered therapy | ((patient or client or person) n1 cent?#red n1 (care or treatment* or therap*))                                               | 11577  |
| 27 | Patient focused care                                            | Client focused care, person focused care                                                                                                                                                                 | ((patient or client or person) n1 focus#ed n1 (care or treatment* or therap*))                                                | 129    |
| 28 | Patient participation in treatment planning, process, decisions | Patient/client autonomy in decision making/care/practice/treatment/planning<br>Patient/client involvement in decision making/care/practice/treatment/planning<br>Patient/client control in decision      | (patient or client) n1 (autonom* or involve* or control or empower*) n1 (decision making or                                   | 757    |



|    |                                                |                                                                                                                              |                                                                                                                                                             |      |
|----|------------------------------------------------|------------------------------------------------------------------------------------------------------------------------------|-------------------------------------------------------------------------------------------------------------------------------------------------------------|------|
|    |                                                | making/care/practice/treatment/planning<br>Patient/client empowerment in decision<br>making/care/practice/treatment/planning | care or practic* or<br>treatment* or plan*)                                                                                                                 |      |
| 29 | Collaborative care                             | Collaborative practices, collaborative<br>treatment, collaborative care planning                                             | collaborative (care<br>or practic* or<br>treatment* or<br>plan*)                                                                                            | 3665 |
| 30 | Shared decision-<br>making                     | shared decision making, joint decision making                                                                                | (shared or joint or<br>collaborative) n2<br>decision making                                                                                                 | 3010 |
| 31 | Therapeutic alliance                           |                                                                                                                              | DE "Therapeutic<br>Alliance"                                                                                                                                | 4339 |
| 32 | Relational practice                            |                                                                                                                              | "relational practic*"                                                                                                                                       | 200  |
| 33 | Enhanced patient-<br>provider<br>relationship  | physician/doctor/nurse/professional/provider-<br>patient/client<br>alliance/empowerment/support/enhance                      | (physician or doctor<br>or nurse or<br>professional or<br>provider) n1 (patient<br>or client) n1<br>(enhanc* or<br>alliance* or<br>empower* or<br>support*) | 413  |
| 34 | Enhanced patient-<br>provider<br>communication | physician/doctor/nurse/professional/provider-<br>patient/client communication                                                | (physician or doctor<br>or nurse or<br>professional or<br>provider) n1 (patient<br>or client) n1<br>communicat*                                             | 2804 |
| 35 | Holistic Nursing                               | holistic nursing care                                                                                                        | holistic nursing                                                                                                                                            | 299  |

|    |                        |                                                                                             |                                                                                                       |       |
|----|------------------------|---------------------------------------------------------------------------------------------|-------------------------------------------------------------------------------------------------------|-------|
| 36 | Trauma informed care   | trauma-informed, trauma informed, trauma centered with care, approach, treatment or therapy | trauma n1 (cent#red or informed) n1 (care or approach or treatment* or therap*)                       | 511   |
| 37 | Culturally safe care   | culturally sensitive care                                                                   | cultural* n1 (safe or sensitive) n1 (care or approach or treatment* or therap*)                       | 808   |
| 39 | Family Systems Nursing |                                                                                             | "Family Systems Nursing"                                                                              | 58    |
| 39 | Expert patient program | expert patient programme                                                                    | "expert patient program*"                                                                             | 9     |
| 40 |                        | (All patient-centered care related terms)                                                   | S25 OR S26 OR S27 OR S28 OR S29 OR S30 OR S31 OR S32 OR S33 OR S34 OR S35 OR S36 OR S37 OR S38 OR S39 | 27380 |
| 41 |                        |                                                                                             | <b>24 and 40</b>                                                                                      | 943   |

Table A4. CINAHL (EBSCO) search strategy

| Search term/line number | Conceptual term of interest | Other keywords/synonyms and notes                                                                                                                                                                                                                                                                                                                                                                                                                                                                                        | Search term entered into CINAHL (EBSCO) | Number of hits |
|-------------------------|-----------------------------|--------------------------------------------------------------------------------------------------------------------------------------------------------------------------------------------------------------------------------------------------------------------------------------------------------------------------------------------------------------------------------------------------------------------------------------------------------------------------------------------------------------------------|-----------------------------------------|----------------|
| 1                       | Substance-Related Disorders | exp substance-related disorders/ or exp alcohol-related disorders/ or exp amphetamine-related disorders/ or exp cocaine-related disorders/ or exp drug overdose/ or exp heroin dependence/ or exp inhalant abuse/ or exp marijuana abuse/ or exp neonatal abstinence syndrome/ or exp opioid-related disorders/ or exp phencyclidine abuse/ or exp psychoses, substance-induced/ or exp substance abuse, intravenous/ or exp substance abuse, oral/ or exp substance withdrawal syndrome/ or exp "tobacco use disorder"/ | (MH "Substance Use Disorders+")         | 133706         |
| 2                       | Street Drugs                | exp street drugs/ or exp crack cocaine/                                                                                                                                                                                                                                                                                                                                                                                                                                                                                  | (MH "Street Drugs+")                    | 4824           |
| 3                       | Substance abuser            | substance abusing                                                                                                                                                                                                                                                                                                                                                                                                                                                                                                        | substance abus*                         | 45,878         |
| 4                       | Substance dependent         | Substance dependency                                                                                                                                                                                                                                                                                                                                                                                                                                                                                                     | substance dependen*                     | 9939           |
| 5                       | Substance misuse            | Substance misusers, substance misusing                                                                                                                                                                                                                                                                                                                                                                                                                                                                                   | substance misus*                        | 1710           |

|    |                           |                                                                                                                                                                                               |                                                                                   |      |
|----|---------------------------|-----------------------------------------------------------------------------------------------------------------------------------------------------------------------------------------------|-----------------------------------------------------------------------------------|------|
| 6  | Problematic substance use | problematic substance users, people with problematic substance use, problematic substance using                                                                                               | problematic substance n2 (use* or usage or using)                                 | 227  |
| 7  | People who inject drugs   | PWID                                                                                                                                                                                          | (people who inject drug* or PWID)                                                 | 1025 |
| 8  | Injection drug use        | IDU, injection drug users                                                                                                                                                                     | injection drug "(use or user or usage or using)" or IDU                           | 1588 |
| 9  | People who use drugs      | PWUD                                                                                                                                                                                          | "people who use drugs" or PWUD                                                    | 208  |
| 10 | Illicit substance use     | Illicit substance using, illicit substance use, illegal substance users, illegal substance using, illegal substance use, street substance users, street substance using, street substance use | (illicit or street or illegal) n2 (drug or substance) n2 (use* or usage or using) | 3780 |
| 11 | opioid dependence         | opioid dependent, opioid dependency, opioid addiction, opioid abuse, opioid misuse, opioid problem                                                                                            | opioid n2 (addict* or abus* or dependen* or misus* or problem* or disorder*)      | 4755 |
| 12 | opiate dependence         | opiate dependent, opiate dependency, opiate addiction, opiate abuse, opiate misuse, opiate problem                                                                                            | opiate n2 (addict* or abus* or dependen* or misus* or problem* or disorder*)      | 848  |
| 13 | narcotic dependence       | narcotic dependent, narcotic dependency, narcotic addiction, narcotic abuse, narcotic misuse, narcotic problem                                                                                | narcotic n2 (addict* or abus* or dependen* or misus* or problem* or disorder*)    | 161  |

|    |                        |                                                                                                                                 |                                                                                                                                |       |
|----|------------------------|---------------------------------------------------------------------------------------------------------------------------------|--------------------------------------------------------------------------------------------------------------------------------|-------|
| 14 | heroin                 | None                                                                                                                            | heroin                                                                                                                         | 4940  |
| 15 | stimulant use disorder |                                                                                                                                 | "stimulant use disorder"                                                                                                       | 20    |
| 16 | exp crack cocaine      | MeSH exploded; this is a separate Mesh from cocaine-related disorders and reflects addiction to crack cocaine                   | (MH "Crack Cocaine")                                                                                                           | 696   |
| 17 | exp cocaine smoking    | Mesh exploded; this is a separate Mesh from cocaine-related disorders and crack cocaine                                         | "cocaine smoking"                                                                                                              | 23    |
| 18 | cocaine dependence     | cocaine dependent, cocaine dependency, cocaine addiction, cocaine abuse, cocaine dependence, cocaine misuse, cocaine problem    | ((cocaine or crack) n2 (addict* or abus* or dependen* or misus* or problem* or disorder*))                                     | 1763  |
| 19 | amphetamine dependence | amphetamine dependent, dependency, addiction, abuse, dependence, misuse, problem; crystal methamphetamine...; crystal meth....; | (amphetamine or crystal methamphetamine or crystal meth) n1 (addict* or abus* or dependen* or misus* or problem* or disorder*) | 138   |
| 20 | alcohol dependence     | alcohol dependent, alcohol dependency, alcohol addiction, alcohol abuse, alcohol miuse, alcohol problem                         | alcohol n2 (addict* or abus* or dependen* or misus* or problem* or disorder*)                                                  | 24324 |
| 21 | cannabis dependence    | cannabis dependent, cannabis dependency, cannabis abuse, cannabis addiction                                                     | cannabis n2 (addict* or abus* or dependen* or disorder*)                                                                       | 1034  |

|    |                                                                 |                                                                                                                                                                                                          |                                                                                                                               |        |
|----|-----------------------------------------------------------------|----------------------------------------------------------------------------------------------------------------------------------------------------------------------------------------------------------|-------------------------------------------------------------------------------------------------------------------------------|--------|
| 22 | tobacco dependence                                              | tobacco or nicotine dependent, tobacco or nicotine dependency, smoking cessation                                                                                                                         | (tobacco or nicotine or smok*) n2 (dependen* or disorder* or cessation)                                                       | 24516  |
| 23 | Diagnosis, Dual (Psychiatry)                                    |                                                                                                                                                                                                          | (MH "Diagnosis, Dual (Psychiatry)")                                                                                           | 2347   |
| 24 |                                                                 | (All problematic substance use related terms)                                                                                                                                                            | 1 or 2 or 3 or 4 or 5 or 6 or 7 or 8 or 9 or 10 or 11 or 12 or 13 or 14 or 15 or 16 or 17 or 18 or 19 or 20 or 21 or 22 or 23 | 165879 |
| 25 | exp Patient-Centered Care                                       |                                                                                                                                                                                                          | (MH "Patient Centered Care")                                                                                                  | 22967  |
| 26 | Patient centered care                                           | patient centered treatment, patient centered therapy, Client centered care, client centered treatment, client centered therapy, Person-Centered Care, person centered treatment, person centered therapy | ((patient or client or person) n1 cent?#red n1 (care or treatment* or therap*))                                               | 24485  |
| 27 | Patient focused care                                            | Client focused care, person focused care                                                                                                                                                                 | ((patient or client or person) n1 focus#ed n1 (care or treatment* or therap*))                                                | 469    |
| 28 | Patient participation in treatment planning, process, decisions | Patient/client autonomy in decision making/care/practice/treatment/planning<br>Patient/client involvement in decision making/care/practice/treatment/planning<br>Patient/client control in decision      | (patient or client) n1 (autonom* or involve* or control or empower*) n1 (decision making or                                   | 1184   |

|    |                                                |                                                                                                                              |                                                                                                                                                             |      |
|----|------------------------------------------------|------------------------------------------------------------------------------------------------------------------------------|-------------------------------------------------------------------------------------------------------------------------------------------------------------|------|
|    |                                                | making/care/practice/treatment/planning<br>Patient/client empowerment in decision<br>making/care/practice/treatment/planning | care or practic* or<br>treatment* or plan*)                                                                                                                 |      |
| 29 | Collaborative care                             | Collaborative practices, collaborative<br>treatment, collaborative care planning                                             | collaborative (care<br>or practic* or<br>treatment* or<br>plan*)                                                                                            | 6219 |
| 30 | Shared decision-<br>making                     | shared decision making, joint decision making                                                                                | (shared or joint or<br>collaborative) n2<br>decision making                                                                                                 | 3901 |
| 31 | Therapeutic alliance                           |                                                                                                                              | "therapeutic<br>alliance"                                                                                                                                   | 930  |
| 32 | Relational practice                            |                                                                                                                              | "relational practic*"                                                                                                                                       | 68   |
| 33 | Enhanced patient-<br>provider<br>relationship  | physician/doctor/nurse/professional/provider-<br>patient/client<br>alliance/empowerment/support/enhance                      | (physician or doctor<br>or nurse or<br>professional or<br>provider) n1 (patient<br>or client) n1<br>(enhanc* or<br>alliance* or<br>empower* or<br>support*) | 598  |
| 34 | Enhanced patient-<br>provider<br>communication | physician/doctor/nurse/professional/provider-<br>patient/client communication                                                | (physician or doctor<br>or nurse or<br>professional or<br>provider) n1 (patient<br>or client) n1<br>communicat*                                             | 2684 |
| 35 | Holistic Nursing                               | holistic nursing care                                                                                                        | (MH "Holistic<br>Nursing")                                                                                                                                  | 2303 |

|    |                        |                                                                                             |                                                                                                       |            |
|----|------------------------|---------------------------------------------------------------------------------------------|-------------------------------------------------------------------------------------------------------|------------|
| 36 | Trauma informed care   | trauma-informed, trauma informed, trauma centered with care, approach, treatment or therapy | trauma n1 (cent#red or informed) n1 (care or approach or treatment* or therap*)                       | 301        |
| 37 | Culturally safe care   | culturally sensitive care                                                                   | cultural* n1 (safe or sensitive) n1 (care or approach or treatment* or therap*)                       | 623        |
| 39 | Family Systems Nursing |                                                                                             | "Family Systems Nursing"                                                                              | 61         |
| 39 | Expert patient program | expert patient programme                                                                    | "expert patient program*"                                                                             | 26         |
| 40 |                        | (All patient-centered care related terms)                                                   | S25 OR S26 OR S27 OR S28 OR S29 OR S30 OR S31 OR S32 OR S33 OR S34 OR S35 OR S36 OR S37 OR S38 OR S39 | 41707      |
| 41 |                        |                                                                                             | <b>24 or 40</b>                                                                                       | <b>940</b> |



Table A5. ISI Web of Science search strategy

| Search term/line number | Conceptual term of interest | Other keywords/synonyms and notes                                                                                                                                                                                                                                                                                                                                                                                                                                                                                        | Search term entered into ISI Web of Science | Number of hits |
|-------------------------|-----------------------------|--------------------------------------------------------------------------------------------------------------------------------------------------------------------------------------------------------------------------------------------------------------------------------------------------------------------------------------------------------------------------------------------------------------------------------------------------------------------------------------------------------------------------|---------------------------------------------|----------------|
| 1                       | Substance-Related Disorders | exp substance-related disorders/ or exp alcohol-related disorders/ or exp amphetamine-related disorders/ or exp cocaine-related disorders/ or exp drug overdose/ or exp heroin dependence/ or exp inhalant abuse/ or exp marijuana abuse/ or exp neonatal abstinence syndrome/ or exp opioid-related disorders/ or exp phencyclidine abuse/ or exp psychoses, substance-induced/ or exp substance abuse, intravenous/ or exp substance abuse, oral/ or exp substance withdrawal syndrome/ or exp "tobacco use disorder"/ | TS="substance-related disorders"            | 1217           |
| 2                       | Street Drugs                | exp street drugs/ or exp crack cocaine/                                                                                                                                                                                                                                                                                                                                                                                                                                                                                  | TS="street drugs"                           | 492            |
| 3                       | Substance abuser            | substance abusing                                                                                                                                                                                                                                                                                                                                                                                                                                                                                                        | TS="substance abus*"                        | 34331          |
| 4                       | Substance dependent         | Substance dependency                                                                                                                                                                                                                                                                                                                                                                                                                                                                                                     | TS="substance dependen*"                    | 3405           |

|    |                           |                                                                                                                                                                                               |                                                                                                |      |
|----|---------------------------|-----------------------------------------------------------------------------------------------------------------------------------------------------------------------------------------------|------------------------------------------------------------------------------------------------|------|
| 5  | Substance misuse          | Substance misusers, substance misusing                                                                                                                                                        | TS="substance misus*"                                                                          | 2721 |
| 6  | Problematic substance use | problematic substance users, people with problematic substance use, problematic substance using                                                                                               | TS= ("Problematic substance" NEAR/2 (use* or usage or using))                                  | 278  |
| 7  | People who inject drugs   | PWID                                                                                                                                                                                          | TS= ("people who inject drug*" or PWID)                                                        | 1802 |
| 8  | Injection drug use        | injection drug users                                                                                                                                                                          | TS=("injection drug" NEAR/2 (use* or usage or using))                                          | 8264 |
| 9  | Injection drug use        | IDU                                                                                                                                                                                           | TS=IDU                                                                                         | 2530 |
| 10 | People who use drugs      | PWUD                                                                                                                                                                                          | TS=("people who use drugs" or PWUD)                                                            | 345  |
| 11 | Illicit substance use     | Illicit substance using, illicit substance use, illegal substance users, illegal substance using, illegal substance use, street substance users, street substance using, street substance use | TS=((illicit or street or illegal) NEAR/2 (drug or substance) NEAR/2 (use* or usage or using)) | 9159 |
| 12 | opioid dependence         | opioid dependent, opioid dependency, opioid addiction, opioid abuse, opioid misuse, opioid problem                                                                                            | TS=(opioid* NEAR/2 (addict* or abus* or dependen* or misus* or problem* or disorder*))         | 9854 |
| 13 | opiate dependence         | opiate dependent, opiate dependency, opiate addiction, opiate abuse, opiate misuse, opiate problem                                                                                            | TS=(opiate* NEAR/2 (addict* or abus* or dependen* or misus* or problem* or disorder*))         | 4886 |

|    |                        |                                                                                                                                 |                                                                                                                                             |       |
|----|------------------------|---------------------------------------------------------------------------------------------------------------------------------|---------------------------------------------------------------------------------------------------------------------------------------------|-------|
| 14 | narcotic dependence    | narcotic dependent, narcotic dependency, narcotic addiction, narcotic abuse, narcotic misuse, narcotic problem                  | TS=(narcotic* NEAR/2 (addict* or abus* or dependen* or misus* or problem* or disorder*))                                                    | 1727  |
| 15 | heroin                 | None                                                                                                                            | TS=heroin                                                                                                                                   | 17783 |
| 16 | stimulant use disorder |                                                                                                                                 | TS="stimulant use disorder"                                                                                                                 | 42    |
| 17 | exp crack cocaine      | MeSH exploded; this is a separate Mesh from cocaine-related disorders and reflects addiction to crack cocaine                   | TS="crack cocaine"                                                                                                                          | 2124  |
| 18 | exp cocaine smoking    | Mesh exploded; this is a separate Mesh from cocaine-related disorders and crack cocaine                                         | TS="cocaine smoking"                                                                                                                        | 107   |
| 19 | cocaine dependence     | cocaine dependent, cocaine dependency, cocaine addiction, cocaine abuse, cocaine dependence, cocaine misuse, cocaine problem    | TS=((cocaine or crack) NEAR/2 (addict* or abus* or dependen* or misus* or problem* or disorder*))                                           | 17686 |
| 20 | amphetamine dependence | amphetamine dependent, dependency, addiction, abuse, dependence, misuse, problem; crystal methamphetamine...; crystal meth....; | TS=((amphetamine or "crystal methamphetamine" or "crystal meth") NEAR/2 (addict* or abus* or dependen* or misus* or problem* or disorder*)) | 1293  |

|    |                              |                                                                                                                                                                                                          |                                                                                                                                     |        |
|----|------------------------------|----------------------------------------------------------------------------------------------------------------------------------------------------------------------------------------------------------|-------------------------------------------------------------------------------------------------------------------------------------|--------|
| 21 | alcohol dependence           | alcohol dependent, alcohol dependency, alcohol addiction, alcohol abuse, alcohol misuse, alcohol problem                                                                                                 | TS=(alcohol NEAR/2 (addict* or abus* or dependen* or misus* or problem* or disorder*))                                              | 55793  |
| 22 | cannabis dependence          | cannabis dependent, cannabis dependency, cannabis abuse, cannabis addiction                                                                                                                              | TS=((cannabis or marijuana) NEAR/2 (addict* or abus* or dependen* or disorder*))                                                    | 3234   |
| 23 | tobacco dependence           | tobacco or nicotine dependent, tobacco or nicotine dependency, smoking cessation                                                                                                                         | TS=((tobacco or nicotine or smok*) NEAR/2 (dependen* or disorder* or cessation))                                                    | 37802  |
| 24 | Diagnosis, Dual (Psychiatry) |                                                                                                                                                                                                          | TS="Dual Diagnosis"                                                                                                                 | 2517   |
| 25 |                              | (All problematic substance use related terms)                                                                                                                                                            | 1 or 2 or 3 or 4 or 5 or 6 or 7 or 8 or 9 or 10 or 11 or 12 or 13 or 14 or 15 or 16 or 17 or 18 or 19 or 20 or 21 or 22 or 23 or 24 | 181173 |
| 26 | Patient centered care        | patient centered treatment, patient centered therapy, Client centered care, client centered treatment, client centered therapy, Person-Centered Care, person centered treatment, person centered therapy | TS=((patient or client or person) NEAR/1 cent?red NEAR/1 (care or treatment* or therap*))                                           | 5814   |
| 27 | Patient focused care         | Client focused care, person focused care                                                                                                                                                                 | TS=((patient or client or person) NEAR/1 focus?ed NEAR/1                                                                            | 16     |

|    |                                                                 |                                                                                                                                                                                                                                                                                                                               |                                                                                                                                                   |       |
|----|-----------------------------------------------------------------|-------------------------------------------------------------------------------------------------------------------------------------------------------------------------------------------------------------------------------------------------------------------------------------------------------------------------------|---------------------------------------------------------------------------------------------------------------------------------------------------|-------|
|    |                                                                 |                                                                                                                                                                                                                                                                                                                               | (care or treatment* or therap*)                                                                                                                   |       |
| 28 | Patient participation in treatment planning, process, decisions | Patient/client autonomy in decision making/care/practice/treatment/planning<br>Patient/client involvement in decision making/care/practice/treatment/planning<br>Patient/client control in decision making/care/practice/treatment/planning<br>Patient/client empowerment in decision making/care/practice/treatment/planning | TS=((patient or client) NEAR/1 (autonom* or involve* or control or empower*) NEAR/1 (decision making or care or practic* or treatment* or plan*)) | 3085  |
| 29 | Collaborative care                                              | Collaborative practices, collaborative treatment, collaborative care planning                                                                                                                                                                                                                                                 | TS=(collaborative NEAR/1 (care or practic* or treatment* or plan*))                                                                               | 7722  |
| 30 | Shared decision-making                                          | shared decision making, joint decision making                                                                                                                                                                                                                                                                                 | TS=((shared or joint or collaborative) NEAR/2 decision making)                                                                                    | 16868 |
| 31 | Therapeutic alliance                                            |                                                                                                                                                                                                                                                                                                                               | TS=("therapeutic alliance")                                                                                                                       | 3293  |
| 32 | Relational practice                                             |                                                                                                                                                                                                                                                                                                                               | TS=("relational practic*")                                                                                                                        | 221   |
| 33 | Enhanced patient-provider relationship                          | physician/doctor/nurse/professional/provider-patient/client<br>alliance/empowerment/support/enhance                                                                                                                                                                                                                           | TS=((physician or doctor or nurse or professional or provider) NEAR/1 (patient or client) NEAR/1 (enhanc* or alliance* or empower* or support*))  | 834   |

|    |                                         |                                                                                             |                                                                                                |            |
|----|-----------------------------------------|---------------------------------------------------------------------------------------------|------------------------------------------------------------------------------------------------|------------|
| 34 | Enhanced patient-provider communication | physician/doctor/nurse/professional/provider-patient/client communication                   | TS=((physician or doctor or nurse or professional or provider) NEAR/1 ("patient communicat*")) | 3212       |
| 34 | Holistic Nursing                        | holistic nursing care                                                                       | TS="Holistic nursing"                                                                          | 265        |
| 35 | Trauma informed care                    | trauma-informed, trauma informed, trauma centered with care, approach, treatment or therapy | TS=(trauma NEAR/1 (cent?red or informed) NEAR/1 (care or approach or treatment* or therap*))   | 418        |
| 36 | Culturally safe care                    | culturally sensitive care                                                                   | TS=(cultural* NEAR/1 (safe or sensitive) NEAR/1 (care or approach or treatment* or therap*))   | 641        |
| 37 | Family Systems Nursing                  |                                                                                             | TS=("Family Systems Nursing")                                                                  | 52         |
| 38 | Expert patient program                  | expert patient programme                                                                    | TS=("expert patient program*")                                                                 | 26         |
| 39 |                                         | (All patient-centered care related terms)                                                   | S26 OR S27 OR S28 OR S29 OR S30 OR S31 OR S32 OR S33 OR S34 OR S35 OR S36 OR S37 OR S38        | 40471      |
| 40 |                                         |                                                                                             | <b>25 and 39</b>                                                                               | <b>882</b> |
