# Supplementary material for: Conceptualizing patient-centered care for substance use disorder treatment: findings from a systematic scoping review
Source: PubMed Central journal article supplement (PMC6739978; doi:10.1186/s13011-019-0227-0), 2019-09-11
Supplement: 13011_2019_227_MOESM3_ESM.pdf [file 13011_2019_227_MOESM3_ESM.pdf]

## Appendix C

### Data Extraction Forms

Table C1. Data extraction and charting for empirical and grey literature sources

| Questions                                                            | Response options                                                                                                                                                                                                                                                                                                                                                                                             |
|----------------------------------------------------------------------|--------------------------------------------------------------------------------------------------------------------------------------------------------------------------------------------------------------------------------------------------------------------------------------------------------------------------------------------------------------------------------------------------------------|
| <b>1. General document details that apply to all reference types</b> |                                                                                                                                                                                                                                                                                                                                                                                                              |
| 1.1 Reference Type                                                   | Empirical quantitative research, empirical qualitative research, empirical mixed-methods, empirical review, conference paper, report (including case report), guideline, book chapter                                                                                                                                                                                                                        |
| 1.2 Publication Year                                                 | Year of publication                                                                                                                                                                                                                                                                                                                                                                                          |
| 1.3 Country and Location                                             | Country of publication (and location if provided)                                                                                                                                                                                                                                                                                                                                                            |
| 1.4 Publication Language                                             | Language of publication<br>Drop down with list of eligible languages                                                                                                                                                                                                                                                                                                                                         |
| 1.5 Research objective, purpose, aims                                | What was the research objective or specific question (PICO) to be tested?<br>Open text                                                                                                                                                                                                                                                                                                                       |
| 1.6 Target sample                                                    | Would the target population of the study/intervention/health care setting be classified as primarily:<br>a) patients/clients/service users<br>b) health care providers<br>c) both                                                                                                                                                                                                                            |
| 1.7 Main category of substance used or being treated                 | a) Tobacco<br>b) Cannabis<br>c) Alcohol<br>d) Opioids (Specify: illicit vs. misuse of prescribed opioids)<br>e) Stimulants (Specify: Cocaine vs. Amphetamine)<br>f) Multi/Poly Substance (Specify: e.g., alcohol and opioids)<br>g) Not a targeted group, substance users in general (e.g., people accessing inpatient residential program)<br>h) Dual diagnosis (Specify: e.g., schizophrenia and cannabis) |
| 1.8 Operational definition of patient-centered care                  | What was the operational definition of the patient-centered care approach or dimension(s) used?<br>Open text:                                                                                                                                                                                                                                                                                                |
| 1.9 Specific Dimension of PCC                                        | Which of the following dimensions/principles/components of PCC were studied?<br>a) Structured PCC framework integrating each of the classic dimensions of PCC.<br>b) Whole person/holistic care/comprehensive care                                                                                                                                                                                           |

|                                                                                                  |                                                                                                                                                                                                                                                                                                                       |
|--------------------------------------------------------------------------------------------------|-----------------------------------------------------------------------------------------------------------------------------------------------------------------------------------------------------------------------------------------------------------------------------------------------------------------------|
|                                                                                                  | <ul style="list-style-type: none"> <li>c) Individualized/personalized care</li> <li>d) Empowering care/shared decision making/collaborative care</li> <li>e) Enhanced patient-provider relationship/therapeutic alliance/relational care</li> <li>f) Trauma informed care</li> <li>g) Culturally safe care</li> </ul> |
| 1.10 Context/setting                                                                             | <p>What health-oriented context was the PCC intervention apart of?</p> <ul style="list-style-type: none"> <li>a) Hospital</li> <li>b) Outpatient general health</li> <li>c) Outpatient addiction specific</li> <li>d) Residential addiction</li> <li>e) Other, specify:</li> </ul>                                    |
| 1.11 Health professionals involved                                                               | <p>What health professionals were involved?</p> <ul style="list-style-type: none"> <li>a) Medical care</li> <li>b) Nursing care</li> <li>c) Case managers</li> <li>d) Social work</li> <li>e) Counselor/psychologist</li> <li>f) Psychiatrist</li> <li>g) Other, specify:</li> </ul>                                  |
| 1.12 Type of addiction treatment offered                                                         | <p>What type of addiction treatment was being offered?</p> <p>Open text:</p>                                                                                                                                                                                                                                          |
| <b>2. Data Extraction Questions Specific to Empirical Quantitative and Mixed Methods Studies</b> |                                                                                                                                                                                                                                                                                                                       |
| 2.1 Quantitative Study design                                                                    | Observational, experimental, quasi-experimental?                                                                                                                                                                                                                                                                      |
| 2.2 Study hypotheses                                                                             | Open text                                                                                                                                                                                                                                                                                                             |
| 2.3 Specific eligibility criteria                                                                | What were the study's inclusion and exclusion criteria?                                                                                                                                                                                                                                                               |
| 2.4 Sample size                                                                                  | Open text                                                                                                                                                                                                                                                                                                             |
| 2.5 Study variables                                                                              | <ul style="list-style-type: none"> <li>1. Dependent variable of interest?</li> <li>2. Secondary outcomes?</li> <li>3. Independent variables?</li> </ul>                                                                                                                                                               |
| 2.6 Secondary outcomes                                                                           |                                                                                                                                                                                                                                                                                                                       |
| 2.7 Main results                                                                                 | What were the main results of the study?                                                                                                                                                                                                                                                                              |
| 2.8 Author's Limitations                                                                         | What limitations did the authors describe?                                                                                                                                                                                                                                                                            |
| 2.9 Other limitations                                                                            | What other limitations are there that the authors did not identify?                                                                                                                                                                                                                                                   |

| <b>3. Data Extraction Questions Specific to Qualitative Studies</b>                                                                                                      |                                                                                                                                                                                           |
|--------------------------------------------------------------------------------------------------------------------------------------------------------------------------|-------------------------------------------------------------------------------------------------------------------------------------------------------------------------------------------|
| 3.1 Qualitative design                                                                                                                                                   | Was the study design phenomenological, grounded theory, etc.?                                                                                                                             |
| 3.2 Specific eligibility criteria                                                                                                                                        | What were the study's inclusion and exclusion criteria?                                                                                                                                   |
| 3.3 Sample size                                                                                                                                                          | Open text                                                                                                                                                                                 |
| 3.4 Main findings                                                                                                                                                        | What were the main findings of the study?                                                                                                                                                 |
| 3.5 Author's Limitations                                                                                                                                                 | What limitations did the authors describe?                                                                                                                                                |
| 3.6 Other Limitations                                                                                                                                                    | What other limitations are there that the authors did not identify?                                                                                                                       |
| <b>4. Data Extraction Questions Specific to Empirical Reviews</b>                                                                                                        |                                                                                                                                                                                           |
| 4.1 Study design                                                                                                                                                         | Was the study design: scoping review, systematic review, meta-analysis, report                                                                                                            |
| 4.2 Specific eligibility criteria                                                                                                                                        | What were the study selection criteria? (e.g., RCTs only, specific populations, concepts, contexts of interest)                                                                           |
| 4.3 Interventions of included studies                                                                                                                                    | What intervention(s) was measured, tested, or observed in the included studies?                                                                                                           |
| 4.4 Outcomes of included studies                                                                                                                                         | What outcome(s) was measured, tested or observed in the included studies?                                                                                                                 |
| 4.5 Main effects and conclusions                                                                                                                                         | What were the main effects and conclusions of the review (according to each research question, each intervention or each outcome under review)                                            |
| 4.6 Study's limitations                                                                                                                                                  | What limitations did the authors describe?                                                                                                                                                |
| 4.7 Other limitations                                                                                                                                                    | What other limitations are they that the authors did not identify?                                                                                                                        |
| <b>5. Data Extraction Questions Specific to Guidelines (including empirical or grey literature or book chapters that are written like a clinical practice guideline)</b> |                                                                                                                                                                                           |
| 5.1 Target audience                                                                                                                                                      | Is there a target audience specified for the guideline/report?<br>a) Policy/decision maker<br>b) Health care providers<br>c) Patient/client/family<br>d) Researcher<br>e) Other, specify: |
| 5.2 Client/patient representation                                                                                                                                        | Were patients/clients included in guideline committee?<br>a) Yes<br>b) No<br>c) Not specified                                                                                             |
| 5.2 Interventions described                                                                                                                                              | List and define all interventions described by the authors of the guideline.                                                                                                              |

|                                              |                                                                                     |
|----------------------------------------------|-------------------------------------------------------------------------------------|
| 5.3 PCC specific intervention                | What patient-centered specific approaches were described?                           |
| 5.4 Anticipated outcomes of PCC intervention | If applicable, were any outcomes reported (e.g., patient or provider satisfaction)? |
| 5.5 Program evaluation                       | If available, results of any ongoing program evaluations?                           |
