# Supplementary material for: Conceptualizing patient-centered care for substance use disorder treatment: findings from a systematic scoping review
Source: PubMed Central journal article supplement (PMC6739978; doi:10.1186/s13011-019-0227-0), 2019-09-11
Supplement: 13011_2019_227_MOESM4_ESM.pdf [file 13011_2019_227_MOESM4_ESM.pdf]

**Reference characteristics:**

- (a) Reference type = quantitative study, qualitative study, mixed methods study, systematic review, report, guideline
- (b) Country of publication
- (c) Target population = Adult clients with problematic substance use; Youth clients with problematic substance use; Health care providers in substance use treatment settings; Both clients and health care providers
- (d) Main substance category = Alcohol; Tobacco; Cannabis; Opioids; Stimulants; Poly-substance; Dual Diagnosis; People receiving addiction treatment in general
- (e) Addiction treatment delivered = Pharmacological (includes medication assisted maintenance and detox); Psychosocial (includes education, counseling, etc); Pharmacological & Psychosocial (when a combination of those approaches was used); Not specified (sometimes references did specify the kind of addiction treatment)
- (f) Setting = Inpatient; Outpatient; Inpatient & Outpatient

**Table 1. Coding Guide for Objective 2**

| Category                  | Subcategory                    | Code                                                                                 | Definition and Notes                                                                                                       |
|---------------------------|--------------------------------|--------------------------------------------------------------------------------------|----------------------------------------------------------------------------------------------------------------------------|
| Therapeutic alliance (TA) | Defining characteristics of TA | Non-judgmental, respectful, dignity, accepting approach, minimized power differences | These characteristics reflect the attitudes or behaviours of the provider                                                  |
|                           |                                | Anti-stigmatizing approach                                                           | More than just non-judgmental or non-discriminating, but an active approach at challenging stigma                          |
|                           |                                | Trust                                                                                | Trust may also be a condition or outcome of this and may appear in some of the other principles, depending on the context. |
|                           |                                | Empathy, understanding, warmth, kindness, supportive approach                        |                                                                                                                            |

PCC Scoping Review – Directed content analysis coding framework

|  |                                |                                                                |                                                                                                                                                                                                                                                                                                                                                                         |
|--|--------------------------------|----------------------------------------------------------------|-------------------------------------------------------------------------------------------------------------------------------------------------------------------------------------------------------------------------------------------------------------------------------------------------------------------------------------------------------------------------|
|  |                                | Bond                                                           | Added because it was defined in other frameworks of PCC.                                                                                                                                                                                                                                                                                                                |
|  |                                | Time flexible, not being rushed                                | This could also be some of the factors contributing to developing TA. For now, we'll keep it here but might end up moving depending on the context given in the references to these attributes.                                                                                                                                                                         |
|  |                                | Openness, active listening, conversational communication style | This could also be some of the factors contributing to developing TA. For now, we'll keep it here but might end up moving depending on the context given in the references to these attributes.<br><br>Need to really see how these aspects are framed/contextualized in the references, these codes might need to be split up and/or moved to factors contributing to. |
|  |                                | Open codes                                                     | To be used when the TA was defined in a way that is not synonymous with any of the above codes.                                                                                                                                                                                                                                                                         |
|  | Consequences or outcomes of TA | Frequency of substance use                                     | e.g., number of days                                                                                                                                                                                                                                                                                                                                                    |
|  |                                | Severity or intensity of substance use                         | e.g., number of times per day, number of drinks per week, a standardized severity score                                                                                                                                                                                                                                                                                 |
|  |                                | Craving, withdrawal                                            |                                                                                                                                                                                                                                                                                                                                                                         |
|  |                                | Adherence                                                      | Adhering to treatment protocol or treatment plan; treatment completion                                                                                                                                                                                                                                                                                                  |
|  |                                | Engagement                                                     | Initiated treatment, number of counseling                                                                                                                                                                                                                                                                                                                               |

PCC Scoping Review – Directed content analysis coding framework

|  |                                      |                                                |                                                                                                                                            |
|--|--------------------------------------|------------------------------------------------|--------------------------------------------------------------------------------------------------------------------------------------------|
|  |                                      |                                                | sessions,                                                                                                                                  |
|  |                                      | Retention                                      | Length of stay in treatment                                                                                                                |
|  |                                      | Patient-reported outcome measures              | e.g., Health-related QoL, psychosocial outcomes, functionality,                                                                            |
|  |                                      | Patient-reported experiences                   | e.g., Treatment satisfaction                                                                                                               |
|  |                                      | Other dimensions of PCC as a consequence of TA | Open code at first                                                                                                                         |
|  |                                      | Open codes                                     | To be used when for outcomes that does not fall into any of the above codes.                                                               |
|  | Factors contributing to increased TA | Open codes                                     | Start with open codes since I don't have any a priori ideas for what this might be. There could be client and/or provider characteristics. |
|  | Quantitative measure of TA           | Measured with Working Alliance Inventory       | Quant designs                                                                                                                              |
|  |                                      | Measured with Helping Alliance Inventory       | Quant designs                                                                                                                              |
|  |                                      | Measured with other tool                       | Quant designs; if start to notice that there was one common other tool than create a code for it.                                          |
|  | Open Subcategories                   | Open codes                                     | For anything not captured in the others.                                                                                                   |

|                              |                                 |                                                                                                                                       |                                                                                                                                                                                                       |
|------------------------------|---------------------------------|---------------------------------------------------------------------------------------------------------------------------------------|-------------------------------------------------------------------------------------------------------------------------------------------------------------------------------------------------------|
| Shared decision-making (SDM) | Defining characteristics of SDM | Encouragement and/or empowerment from provider for patient to make treatment decisions, sharing power                                 | Empowerment is a tricky one because it can also be something that leads to SDM or is an inherent characteristic of SDM. Be very thorough on capturing the context and making sure that is transparent |
|                              |                                 | Building client’s capacity for self-management and self-care, helping client be aware that they’re not powerless outside of treatment | This is distinct from empowerment within the actual treatment process itself. That should be captured above.                                                                                          |
|                              |                                 | Autonomous, independent, client-led decision-making                                                                                   |                                                                                                                                                                                                       |
|                              |                                 | Collaborative decision-making, mutual agreement, mutual decision-making, client participation in, sharing responsibility              |                                                                                                                                                                                                       |
|                              |                                 | Sharing information in a manner that is appropriate for the client, allows them to make an informed decision                          |                                                                                                                                                                                                       |
|                              |                                 | Discussions of client concerns, uncertainties, questions                                                                              |                                                                                                                                                                                                       |
|                              |                                 | Open codes                                                                                                                            | For characteristics that don’t fit into any of the above codes.                                                                                                                                       |
|                              |                                 |                                                                                                                                       |                                                                                                                                                                                                       |
|                              | Consequences or outcomes of SDM | Frequency of substance use                                                                                                            | e.g., number of days                                                                                                                                                                                  |
|                              |                                 | Severity or intensity of substance use                                                                                                | e.g., number of times per day, number of drinks per week, a standardized severity score                                                                                                               |

PCC Scoping Review – Directed content analysis coding framework

|  |                             |                                                                                                                                           |                                                                                                                  |
|--|-----------------------------|-------------------------------------------------------------------------------------------------------------------------------------------|------------------------------------------------------------------------------------------------------------------|
|  |                             | Craving, withdrawal                                                                                                                       |                                                                                                                  |
|  |                             | Adherence                                                                                                                                 | Adhering to treatment protocol or treatment plan; treatment completion                                           |
|  |                             | Engagement                                                                                                                                | Initiated treatment, number of counseling sessions,                                                              |
|  |                             | Retention                                                                                                                                 | Length of stay in treatment                                                                                      |
|  |                             | Patient-reported outcome measures                                                                                                         | e.g., Health-related QoL, psychosocial outcomes, functionality,                                                  |
|  |                             | Patient-reported experiences                                                                                                              | e.g., Treatment satisfaction                                                                                     |
|  |                             | Decisional quality; decisional comfort                                                                                                    | Feeling informed, feeling that personal values are supported, perceived effectiveness of decision-making process |
|  |                             | Perceived empowerment outside of the treatment (e.g., in relationships, in feelings of increased confidence, accessing other health care) |                                                                                                                  |
|  |                             | Other dimensions of PCC as a consequence of SDM                                                                                           | Open code at first                                                                                               |
|  |                             | Open codes                                                                                                                                | For any consequences or outcomes or outcomes not captured above                                                  |
|  | Factors contributing to SDM | Open codes                                                                                                                                |                                                                                                                  |

PCC Scoping Review – Directed content analysis coding framework

|                          |                                |                                                                                                                                           |                                                                                                                                                |
|--------------------------|--------------------------------|-------------------------------------------------------------------------------------------------------------------------------------------|------------------------------------------------------------------------------------------------------------------------------------------------|
|                          | Quantitative measures of SDM   | Measured by decision aid intervention                                                                                                     | For quant references;                                                                                                                          |
|                          |                                | Open codes                                                                                                                                | For other quant variables that were used for SDM                                                                                               |
|                          | Open Subcategories             |                                                                                                                                           |                                                                                                                                                |
| Individualized care (IC) | Defining characteristics of IC | Delivery of treatment according to patient needs and preferences from patient perspective                                                 | This code is tapping into our conceptualization of pcc-individualized care.                                                                    |
|                          |                                | Treatment matching                                                                                                                        | Sometimes from the health care provider’s pov. Is this really patient-centered? This is for our discussion, worth pointing out/distinguishing. |
|                          |                                | Intake assessments that integrate client’s expected outcomes and goals for treatment or other efforts to understand client’s expectations |                                                                                                                                                |
|                          |                                | Intake assessment of what treatment (e.g., what medication, what dose, what type of counseling) client’s preferred                        |                                                                                                                                                |
|                          |                                | As-needed-dosing                                                                                                                          |                                                                                                                                                |
|                          |                                | Examine client’s potential treatment barriers and providing support to overcome these barriers                                            |                                                                                                                                                |

PCC Scoping Review – Directed content analysis coding framework

|  |                                |                                                                                           |                                                                                         |
|--|--------------------------------|-------------------------------------------------------------------------------------------|-----------------------------------------------------------------------------------------|
|  |                                | Intermittent, mid-point, or ongoing evaluation of client outcomes, goals, and preferences |                                                                                         |
|  |                                | Transition or discharge planning at clients pace                                          |                                                                                         |
|  |                                | Open codes                                                                                |                                                                                         |
|  | Consequences or outcomes of IC | Frequency of substance use                                                                | e.g., number of days                                                                    |
|  |                                | Severity or intensity of substance use                                                    | e.g., number of times per day, number of drinks per week, a standardized severity score |
|  |                                | Adherence                                                                                 | Adhering to treatment protocol or treatment plan; treatment completion                  |
|  |                                | Craving, withdrawal                                                                       |                                                                                         |
|  |                                | Engagement                                                                                | Initiated treatment, number of counseling sessions,                                     |
|  |                                | Retention                                                                                 | Length of stay in treatment                                                             |
|  |                                | Patient-reported outcome measures                                                         | e.g., Health-related QoL, psychosocial outcomes, functionality,                         |
|  |                                | Patient-reported experiences                                                              | e.g., Treatment satisfaction                                                            |
|  |                                | Other dimensions of PCC as a consequence of IC                                            | Open code at first                                                                      |
|  |                                | Open codes                                                                                | For any qualitative consequences or outcomes or outcomes not captured above             |

|                    |                                |                                                                                                                                                                  |                                                                                                                                                                                                                                                                                                                |
|--------------------|--------------------------------|------------------------------------------------------------------------------------------------------------------------------------------------------------------|----------------------------------------------------------------------------------------------------------------------------------------------------------------------------------------------------------------------------------------------------------------------------------------------------------------|
|                    | Factors contributing to IC     | Open codes                                                                                                                                                       |                                                                                                                                                                                                                                                                                                                |
|                    | Quantitative measures of IC    | Open codes                                                                                                                                                       |                                                                                                                                                                                                                                                                                                                |
|                    | Open Subcategories             | Open codes                                                                                                                                                       |                                                                                                                                                                                                                                                                                                                |
| Holistic care (HC) | Defining characteristics of HC | Direct provision of addiction treatment within a primary care, psychosocial treatment and/or case management type of care setting that is not addiction specific | Making clear that our definition of psychosocial and/or behavioural interventions includes individual and/or group therapy. Interventions may include any of the following: CBT, MI, MET, psychodynamic, etc)<br><br>Case management - employment support, housing support, legal support, family reconnection |
|                    |                                | Direct provision of primary, psychosocial care and/or case management as part of an addiction treatment setting                                                  |                                                                                                                                                                                                                                                                                                                |
|                    |                                | Coordination or referral for primary, psychosocial care and/or case management or a continuum of care approach                                                   |                                                                                                                                                                                                                                                                                                                |
|                    |                                | Involvement of family, community and close others                                                                                                                |                                                                                                                                                                                                                                                                                                                |
|                    |                                | Provision of childcare                                                                                                                                           |                                                                                                                                                                                                                                                                                                                |



PCC Scoping Review – Directed content analysis coding framework

|            |                                                                             |                                                                                                   |                                                                                         |
|------------|-----------------------------------------------------------------------------|---------------------------------------------------------------------------------------------------|-----------------------------------------------------------------------------------------|
|            |                                                                             | Delivery of services or treatment that client’s perceived spiritual treatment needs               |                                                                                         |
|            |                                                                             | Open codes                                                                                        |                                                                                         |
|            | Consequences or outcomes of HC                                              | Frequency of substance use                                                                        | e.g., number of days                                                                    |
|            |                                                                             | Severity or intensity of substance use                                                            | e.g., number of times per day, number of drinks per week, a standardized severity score |
|            |                                                                             | Adherence                                                                                         | Adhering to treatment protocol or treatment plan; treatment completion                  |
|            |                                                                             | Engagement                                                                                        | Initiated treatment, number of counseling sessions,                                     |
|            |                                                                             | Retention                                                                                         | Length of stay in treatment                                                             |
|            |                                                                             | Health outcomes, improvement in health unrelated to addiction, clinical and/or objective outcomes | Clinical, lab, observed, objective, not self-report                                     |
|            |                                                                             | Patient-reported outcome measures                                                                 | e.g., Health-related QoL, psychosocial outcomes, functionality,                         |
|            |                                                                             | Patient-reported experiences                                                                      | e.g., Treatment satisfaction                                                            |
|            |                                                                             | Other dimensions of PCC as a consequence of HC                                                    | Open code at first                                                                      |
| Open codes | For any qualitative consequences or outcomes or outcomes not captured above |                                                                                                   |                                                                                         |

PCC Scoping Review – Directed content analysis coding framework

|                              |                                 |                                        |                                                                                         |
|------------------------------|---------------------------------|----------------------------------------|-----------------------------------------------------------------------------------------|
|                              | Factors contributing to HC      | Open codes                             |                                                                                         |
|                              | Quantitative measures of HC     | Open codes                             |                                                                                         |
|                              | Open Subcategories              |                                        |                                                                                         |
| Trauma informed care (TIC)   | Defining characteristics of TIC | TIC framework applied with a citation  |                                                                                         |
|                              |                                 | Open Codes                             | Nuanced or unique way of expanding on their approach, etc.                              |
|                              | Consequences or outcomes of HC  | Frequency of substance use             | e.g., number of days                                                                    |
|                              |                                 | Severity or intensity of substance use | e.g., number of times per day, number of drinks per week, a standardized severity score |
|                              |                                 | Adherence                              | Adhering to treatment protocol or treatment plan; treatment completion                  |
|                              |                                 | Engagement                             | Initiated treatment, number of counseling sessions,                                     |
|                              |                                 | Retention                              | Length of stay in treatment                                                             |
|                              |                                 | Patient-reported outcome measures      | e.g., Health-related QoL, psychosocial outcomes, functionality,                         |
| Patient-reported experiences | e.g., Treatment satisfaction    |                                        |                                                                                         |

PCC Scoping Review – Directed content analysis coding framework

|                            |                                 |                                                                               |                                                                                                      |
|----------------------------|---------------------------------|-------------------------------------------------------------------------------|------------------------------------------------------------------------------------------------------|
|                            |                                 | Other dimensions of PCC as a consequence of HC                                | Open code at first                                                                                   |
|                            | Factors contributing with TIC   | Open codes                                                                    | Might be systems/organizational/structural factors (e.g., provider training, redesigning structures) |
|                            | Quantitative measures of TIC    | Open codes                                                                    |                                                                                                      |
|                            |                                 | Open sub-categories                                                           |                                                                                                      |
| Culturally safe care (CSC) | Defining characteristics of CSC | Framework applied with a citation (including training, compliance monitoring) |                                                                                                      |
|                            |                                 | Matching culture/ethnicity between provider and client                        |                                                                                                      |
|                            |                                 | Open codes                                                                    | For those references that include a nuanced or unique way of expanding on their approach             |
|                            | Consequences or outcomes of CSC | Frequency of substance use                                                    | e.g., number of days                                                                                 |
|                            |                                 | Severity or intensity of substance use                                        | e.g., number of times per day, number of drinks per week, a standardized severity score              |
|                            |                                 | Adherence                                                                     | Adhering to treatment protocol or treatment plan; treatment completion                               |
|                            |                                 | Engagement                                                                    | Initiated treatment, number of counseling sessions,                                                  |

PCC Scoping Review – Directed content analysis coding framework

|                              |                             |                                                 |                                                                                                                                                                                                                              |
|------------------------------|-----------------------------|-------------------------------------------------|------------------------------------------------------------------------------------------------------------------------------------------------------------------------------------------------------------------------------|
|                              |                             | Retention                                       | Length of stay in treatment, may need to add a qualifier for in this principle.                                                                                                                                              |
|                              |                             | Patient-reported outcome measures               | e.g., Health-related QoL, psychosocial outcomes, functionality,                                                                                                                                                              |
|                              |                             | Patient-reported experiences                    | e.g., Treatment satisfaction                                                                                                                                                                                                 |
|                              |                             | Other dimensions of PCC as a consequence of CSC | Open code at first                                                                                                                                                                                                           |
|                              |                             | Open codes                                      | For any qualitative consequences or outcomes or outcomes not captured above;<br><br>For discussion of possible outcomes associated with CSC point out that this is usually relevant to the particular sub-group of interest. |
|                              | Factors contributing to CSC | Open codes                                      | Might be systems/organizational/structural factors (e.g., provider training, redesigning structures)                                                                                                                         |
| Quantitative measures of CSC | Open codes                  |                                                 |                                                                                                                                                                                                                              |
