# Supplementary material for: Conceptualizing patient-centered care for substance use disorder treatment: findings from a systematic scoping review
Source: PubMed Central journal article supplement (PMC6739978; doi:10.1186/s13011-019-0227-0), 2019-09-11
Supplement: 13011_2019_227_MOESM5_ESM.pdf [file 13011_2019_227_MOESM5_ESM.pdf]

| Result # | Reference                                                                                                                                                                                                                                                                                                                                                                                  | Exclusion Criteria                  |
|----------|--------------------------------------------------------------------------------------------------------------------------------------------------------------------------------------------------------------------------------------------------------------------------------------------------------------------------------------------------------------------------------------------|-------------------------------------|
| 1        | <b>Marianne S Matthias, Melvin T Donaldson, Agnes C Jensen, Erin E Krebs.</b> "I Was a Little Surprised": Qualitative Insights From Patients Enrolled in a 12-Month Trial Comparing Opioids With Nonopioid Medications for Chronic Musculoskeletal Pain.. <i>The journal of pain : official journal of the American Pain Society</i> . 2018//. #volume#:#pages#                            | Level 1, Form Title/abstract screen |
| 2        | <b>Yoong Mei Theng, Suzaily Wahab, Noor Alaudin Wahab, Hatta Sidi, Srijit Das.</b> Schizophrenia And Nicotine Dependence: What Psychopharmacological Treatment Options Are Available For The Duo Perturbations?.. <i>Current drug targets</i> . 2017//. #volume#:#pages#                                                                                                                   | Level 1, Form Title/abstract screen |
| 3        | <b>Katie Schultz, Ciwang Teyra, Glenda Breiler, Tessa Evans-Campbell, Cynthia Pearson.</b> "They Gave Me Life": Motherhood and Recovery in a Tribal Community.. <i>Substance use &amp; misuse</i> . 2018//. #volume#:1                                                                                                                                                                     | Level 1, Form Title/abstract screen |
| 4        | <b>John B Correa, Karen O Brandon, Lauren R Meltzer, Hannah J Hoehn, Barbara Pineiro, Thomas H Brandon, Vani N Simmons.</b> Electronic cigarette use among patients with cancer: Reasons for use, beliefs, and patient-provider communication.. <i>Psycho-oncology</i> . 2018//. #volume#:#pages#                                                                                          | Level 1, Form Title/abstract screen |
| 5        | <b>Doyanne Darnell, Aaron Flaster, Karin Hendricks, Amanda Kerbrat, Katherine Anne Comtois.</b> Adolescent clinical populations and associations between trauma and behavioral and emotional problems.. <i>Psychological trauma : theory, research, practice and policy</i> . 2018//. #volume#:#pages#                                                                                     | Level 1, Form Title/abstract screen |
| 6        | <b>Julia Rozanova, Olga Morozova, Lyuba Azbel, Chethan Bachireddy, Jacob M Izenberg, Tetiana Kiriazova, Sergiy Dvoryak, Frederick L Altice.</b> Perceptions of Health-Related Community Reentry Challenges among Incarcerated Drug Users in Azerbaijan, Kyrgyzstan, and Ukraine.. <i>Journal of urban health : bulletin of the New York Academy of Medicine</i> . 2018//. #volume#:#pages# | Level 1, Form Title/abstract screen |
| 8        | <b>Nikki R Wooten, Jordan A Brittingham, Ronald O Pitner, Abbas S Tavakoli, Diana D Jeffery, K Sue Haddock.</b> Purchased Behavioral Health Care Received by Military Health System Beneficiaries in Civilian Medical Facilities, 2000-2014.. <i>Military medicine</i> . 2018//. #volume#:#pages#                                                                                          | Level 1, Form Title/abstract screen |
| 9        | <b>Elise Omaki, Renan Castillo, Karen Eden, Steve Davis, Eileen McDonald, Umbreen Murtaza, Andrea Gielen, My Healthy Choices Decision Aid Study Team.</b> Using m-health tools to reduce the misuse of opioid pain relievers.. <i>Injury prevention : journal of the International Society for Child and Adolescent Injury Prevention</i> . 2017//. #volume#:#pages#                       | Level 1, Form Title/abstract screen |
| 10       | <b>Donald N. Givler, Amy Givler.</b> Health Screening.. #journal#. 2017//. #volume#:#pages#                                                                                                                                                                                                                                                                                                | Level 1, Form Title/abstract screen |
| 11       | <b>Susie Rudge, Janet Denise Feigenbaum, Peter Fonagy.</b> Mechanisms of change in dialectical behaviour therapy and cognitive behaviour therapy for borderline personality disorder: a critical review of the literature.. <i>Journal of mental health (Abingdon, England)</i> . 2017//. #volume#:1                                                                                       | Level 1, Form Title/abstract screen |
| 12       | <b>Jane Murray Cramm, Anna Petra Nieboer.</b> Is "disease management" the answer to our problems? No! Population health management and (disease) prevention require "management of overall well-being".. <i>BMC health services research</i> . 2016//. 16:500                                                                                                                              | Level 1, Form Title/abstract screen |
| 13       | <b>Kelley A Saia, Davida Schiff, Elisha M Wachman, Pooja Mehta, Annmarie Vilkins, Michelle Sia, Jordana Price, Tirah Samura, Justin DeAngelis,</b>                                                                                                                                                                                                                                         | Level 2, Form Full Text             |

|    |                                                                                                                                                                                                                                                                                                                                   |                                     |
|----|-----------------------------------------------------------------------------------------------------------------------------------------------------------------------------------------------------------------------------------------------------------------------------------------------------------------------------------|-------------------------------------|
|    | <b>Clark V Jackson, Sawyer F Emmer, Daniel Shaw, Sarah Bagley.</b> Caring for Pregnant Women with Opioid Use Disorder in the USA: Expanding and Improving Treatment.. <i>Current obstetrics and gynecology reports.</i> 2016//. 5:257                                                                                             | Screening                           |
| 14 | <b>Preeta Saxena, Christine E Grella, Nena P Messina.</b> Continuing Care and Trauma in Women Offenders' Substance Use, Psychiatric Status, and Self-Efficacy Outcomes.. <i>Women &amp; criminal justice.</i> 2016//. 26:99                                                                                                       | Level 1, Form Title/abstract screen |
| 15 | <b>Sofie L Champassak, Delwyn Catley, Sarah Finocchiaro-Kessler, Maghen Farris, Maniza Ehtesham, Rachel Schoor, Kathy Goggin.</b> Physician smoking cessation counseling and adherence to a clinical practice guideline.. <i>European journal for person centered healthcare.</i> 2014//. 2:477                                   | Level 2, Form Full Text Screening   |
| 16 | <b>Paul Crits-Christoph, Robert Gallop, Mary Beth Connolly Gibbons, Jaclyn S Sadicario, George Woody.</b> Measuring Outcome in the Treatment of Cocaine Dependence.. <i>Journal of alcoholism and drug dependence.</i> 2013//. 1:#pages#                                                                                          | Level 1, Form Title/abstract screen |
| 17 | <b>Camille S Wilson, Melanie E Bennett, Alan S Bellack.</b> Impact of Family History in Persons With Dual Diagnosis.. <i>Journal of dual diagnosis.</i> 2013//. 9:30                                                                                                                                                              | Level 1, Form Title/abstract screen |
| 18 | <b>Swedish Council on Health Technology Assessment.</b> . #journal#. 2012//. #volume#:#pages#                                                                                                                                                                                                                                     | Level 1, Form Title/abstract screen |
| 20 | <b>R Fredericksen, P K Crane, J Tufano, J Ralston, S Schmidt, T Brown, D Layman, R D Harrington, S Dhanireddy, T Stone, W Lober, M M Kitahata, H M Crane.</b> Integrating a web-based, patient-administered assessment into primary care for HIV-infected adults.. <i>Journal of AIDS and HIV research (Online).</i> 2012//. 4:47 | Level 1, Form Title/abstract screen |
| 21 | <b>Shelly A Wiechelt, Brenda A Miller, Nancy J Smyth, Eugene Maguin.</b> ASSOCIATIONS BETWEEN POST-TRAUMATIC STRESS DISORDER SYMPTOMS AND ALCOHOL AND OTHER DRUG PROBLEMS: IMPLICATIONS FOR SOCIAL WORK PRACTICE.. <i>Practice (Birmingham, England).</i> 2011//. 23:183                                                          | Level 1, Form Title/abstract screen |
| 22 | <b>Colleen Dell, Jennifer Kilty, Cathy Fillmore, Sheila Grantham, Tara Lyons, Sharon Clarke, Carol Hopkins.</b> Turtle Finding Fact Sheet: The Role of the Treatment Provider in Aboriginal Women's Healing from Illicit Drug Abuse.. <i>CES4Health.info.</i> 2010//. #volume#:#pages#                                            | Level 2, Form Full Text Screening   |
| 24 | <b>Aaron Hogue, Howard A Liddle.</b> Family-based treatment for adolescent substance abuse: controlled trials and new horizons in services research.. <i>Journal of family therapy.</i> 2009//. 31:126                                                                                                                            | Level 2, Form Full Text Screening   |
| 25 | <b>Anthony C Tommasello.</b> Substance abuse and pharmacy practice: what the community pharmacist needs to know about drug abuse and dependence.. <i>Harm reduction journal.</i> 2004//. 1:3                                                                                                                                      | Level 1, Form Title/abstract screen |
| 26 | <b>James L. Elmore.</b> Dissociative Spectrum Disorders in the Primary Care Setting.. <i>Primary care companion to the Journal of clinical psychiatry.</i> 2000//. 2:37                                                                                                                                                           | Level 1, Form Title/abstract screen |
| 27 | <b>Wiley D Jenkins, Alicia K Matthews, Angie Bailey, Whitney E Zahnd, Karriem S Watson, Georgia Mueller-Luckey, Yamile Molina, David Crumly, Julie Patera.</b> Rural areas are disproportionately impacted by smoking and lung cancer.. <i>Preventive medicine reports.</i> 2018//. 10:200                                        | Level 1, Form Title/abstract screen |
| 28 | <b>Kamilla L Venner, Victoria Sanchez, Jacqueline Garcia, Robert L Williams, Andrew L Sussman.</b> Moving Away from the Tip of the Pyramid: Screening and Brief Intervention for Risky Alcohol and Opioid Use in                                                                                                                  | Level 1, Form Title/abstract screen |

|    |                                                                                                                                                                                                                                                                                                                                                                                                   |                                     |
|----|---------------------------------------------------------------------------------------------------------------------------------------------------------------------------------------------------------------------------------------------------------------------------------------------------------------------------------------------------------------------------------------------------|-------------------------------------|
|    | Underserved Patients.. <i>Journal of the American Board of Family Medicine : JABFM</i> . 2018//. 31:243                                                                                                                                                                                                                                                                                           |                                     |
| 29 | <b>Christine A Pace, Lisa A Uebelacker</b> . Addressing Unhealthy Substance Use in Primary Care.. <i>The Medical clinics of North America</i> . 2018//. 102:567                                                                                                                                                                                                                                   | Level 1, Form Title/abstract screen |
| 30 | <b>M K A Hyder, J P Tripathy, J Kaur, P P Mandal, R Sharma, A M V Kumar, T Thamarangsi, R J Singh</b> . Tuberculosis-tobacco integration in the South-East Asia Region: policy analysis and implementation framework.. <i>The international journal of tuberculosis and lung disease : the official journal of the International Union against Tuberculosis and Lung Disease</i> . 2018//. 22:807 | Level 1, Form Title/abstract screen |
| 32 | <b>Kathleen C Thomas, Hillary Owino, Sana Ansari, Leslie Adams, Julianne M Cyr, Bradley N Gaynes, Seth W Glickman</b> . Patient-Centered Values and Experiences with Emergency Department and Mental Health Crisis Care.. <i>Administration and policy in mental health</i> . 2018//. 45:611                                                                                                      | Level 1, Form Title/abstract screen |
| 33 | <b>T V Agibalova, P V Tuchin, D I Shustov, O Zh Buzik</b> . [The therapeutic alliance as a main factor of building cooperation during the treatment of patients with opiate addiction].. <i>Zhurnal nevrologii i psikiatrii imeni S.S. Korsakova</i> . 2014//. 114:57                                                                                                                             | Level 2, Form Full Text Screening   |
| 34 | <b>Allison J Ober, Katherine E Watkins, Colleen M McCullough, Claude M Setodji, Karen Osilla, Sarah B Hunter</b> . Patient predictors of substance use disorder treatment initiation in primary care.. <i>Journal of substance abuse treatment</i> . 2018//. 90:64                                                                                                                                | Level 2, Form Full Text Screening   |
| 35 | <b>Katherine E Watkins, Allison J Ober, Karen Lamp, Mimi Lind, Allison Diamant, Karen Chan Osilla, Keith Heinzerling, Sarah B Hunter, Harold Alan Pincus</b> . Implementing the Chronic Care Model for Opioid and Alcohol Use Disorders in Primary Care.. <i>Progress in community health partnerships : research, education, and action</i> . 2017//. 11:397                                     | Level 1, Form Title/abstract screen |
| 36 | <b>Josephus Fm van den Heuvel, T Katrien Groenhof, Jan Hw Veerbeek, Wouter W van Solinge, A Titia Lely, Arie Franx, Mireille N Bekker</b> . eHealth as the Next-Generation Perinatal Care: An Overview of the Literature.. <i>Journal of medical Internet research</i> . 2018//. 20:e202                                                                                                          | Level 1, Form Title/abstract screen |
| 37 | <b>Katherine Berry, Tom Palmer, Lynsey Gregg, Christine Barrowclough, Fiona Lobban</b> . Attachment and therapeutic alliance in psychological therapy for people with recent onset psychosis who use cannabis.. <i>Clinical psychology &amp; psychotherapy</i> . 2018//. 25:440                                                                                                                   | Level 1, Form Title/abstract screen |
| 38 | <b>P Kushalnagar, Alina Engelman, G Sadler</b> . Deaf patient-provider communication and lung cancer screening: Health Information National Trends survey in American Sign Language (HINTS-ASL).. <i>Patient education and counseling</i> . 2018//. 101:1232                                                                                                                                      | Level 1, Form Title/abstract screen |
| 39 | <b>Katelyn A Grayson-Sneed, Robert C Smith</b> . A research coding method to evaluate a smoking cessation model for training residents-A preliminary report.. <i>Patient education and counseling</i> . 2018//. 101:541                                                                                                                                                                           | Level 1, Form Title/abstract screen |
| 40 | <b>Anke Friedrichs, Anna Silkens, Jens Reimer, Ludwig Kraus, Norbert Scherbaum, Daniela Piontek, Jeanette Rohrig, Jochen Hempleman, Martin Harter, Angela Buchholz</b> . Role preferences of patients with alcohol use disorders.. <i>Addictive behaviors</i> . 2018//. 84:248                                                                                                                    | Level 2, Form Full Text Screening   |
| 42 | <b>Christian Schrader, Antoinette Lenton, Peter Gertonson, Alexander Rahimi</b> . Redeveloping Substance Abuse Treatment for Military Personnel.. <i>Current psychiatry reports</i> . 2018//. 20:45                                                                                                                                                                                               | Level 2, Form Full Text Screening   |

|    |                                                                                                                                                                                                                                                                                                                                                                    |                                     |
|----|--------------------------------------------------------------------------------------------------------------------------------------------------------------------------------------------------------------------------------------------------------------------------------------------------------------------------------------------------------------------|-------------------------------------|
| 43 | <b>Stephen R Holt, Joseph H Donroe, Dana A Cavallo, Jeanette M Tetrault.</b> Addressing discordant quantitative urine buprenorphine and norbuprenorphine levels: Case examples in opioid use disorder.. <i>Drug and alcohol dependence.</i> 2018//. 186:171                                                                                                        | Level 2, Form Full Text Screening   |
| 44 | <b>Brian E Sandoval, Jennifer Bell, Parinda Khatri, Patricia J Robinson.</b> Toward a Unified Integration Approach: Uniting Diverse Primary Care Strategies Under the Primary Care Behavioral Health (PCBH) Model.. <i>Journal of clinical psychology in medical settings.</i> 2018//. 25:187                                                                      | Level 2, Form Full Text Screening   |
| 45 | <b>Caroline Shulman, Briony F Hudson, Joseph Low, Nigel Hewett, Julian Daley, Peter Kennedy, Sarah Davis, Niamh Brophy, Diana Howard, Bella Vivat, Patrick Stone.</b> End-of-life care for homeless people: A qualitative analysis exploring the challenges to access and provision of palliative care.. <i>Palliative medicine.</i> 2018//. 32:36                 | Level 1, Form Title/abstract screen |
| 46 | <b>Gregory A Goldman, Robert J Gregory.</b> Preliminary relationships between adherence and outcome in dynamic deconstructive psychotherapy.. <i>Psychotherapy (Chicago, Ill.).</i> 2009//. 46:480                                                                                                                                                                 | Level 2, Form Full Text Screening   |
| 47 | <b>Elizabeth E Epstein, Barbara S McCrady, Kevin A Hallgren, Ayorkor Gaba, Sharon Cook, Noelle Jensen, Thomas Hildebrandt, Cathryn Glanton Holzhauser, Mark D Litt.</b> Individual versus group female-specific cognitive behavior therapy for alcohol use disorder.. <i>Journal of substance abuse treatment.</i> 2018//. 88:27                                   | Level 2, Form Full Text Screening   |
| 48 | <b>Xinli Li, William Nylander, Tracy Smith, Soonhee Han, William Gunnar.</b> Risk Factors and Predictive Model Development of Thirty-Day Post-Operative Surgical Site Infection in the Veterans Administration Surgical Population.. <i>Surgical infections.</i> 2018//. 19:278                                                                                    | Level 1, Form Title/abstract screen |
| 49 | <b>Paula Wyndow, Roz Walker, Tracy Reibel.</b> A Novel Approach to Transforming Smoking Cessation Practice for Pregnant Aboriginal Women and Girls Living in the Pilbara.. <i>Healthcare (Basel, Switzerland).</i> 2018//. 6:#pages#                                                                                                                               | Level 2, Form Full Text Screening   |
| 50 | <b>Paul R King, Gregory P Beehler, Bonnie M Vest, Kerry Donnelly, Laura O Wray.</b> Qualitative exploration of traumatic brain injury-related beliefs among U.S. military veterans.. <i>Rehabilitation psychology.</i> 2018//. 63:121                                                                                                                              | Level 1, Form Title/abstract screen |
| 51 | <b>Abhijit Nadkarni.</b> Increasing access to psychosocial interventions for alcohol use disorders: Home based interventions.. <i>Indian journal of psychiatry.</i> 2018//. 60:S564                                                                                                                                                                                | Level 1, Form Title/abstract screen |
| 52 | <b>Ju Long, Juntao Michael Yuan, Ron Kim Johnson.</b> A Shared Decision-Making Tool to Prevent Substance Abuse: Protocol for a Randomized Controlled Trial.. <i>JMIR research protocols.</i> 2018//. 7:e5                                                                                                                                                          | Level 2, Form Full Text Screening   |
| 53 | <b>Georgia J Michlig, Ryan P Westergaard, Yukyan Lam, Azal Ahmadi, Gregory D Kirk, Andrew Genz, Jeanne Keruly, Heidi Hutton, Pamela J Surkan.</b> Avoidance, meaning and grief: psychosocial factors influencing engagement in HIV care.. <i>AIDS care.</i> 2018//. 30:511                                                                                         | Level 1, Form Title/abstract screen |
| 54 | <b>Kevin Selby, Gillian Bartlett-Esquilant, Jacques Cornuz.</b> Personalized cancer screening: helping primary care rise to the challenge.. <i>Public health reviews.</i> 2018//. 39:4                                                                                                                                                                             | Level 1, Form Title/abstract screen |
| 55 | <b>Nadia Minian, Aliya Noormohamed, Laurie Zawertailo, Dolly Baliunas, Norman Giesbrecht, Bernard Le Foll, Jurgen Rehm, Andriy Samokhvalov, Peter L Selby.</b> A method for co-creation of an evidence-based patient workbook to address alcohol use when quitting smoking in primary care: a case study.. <i>Research involvement and engagement.</i> 2018//. 4:4 | Level 1, Form Title/abstract screen |

|    |                                                                                                                                                                                                                                                                                                                                                                                      |                                           |
|----|--------------------------------------------------------------------------------------------------------------------------------------------------------------------------------------------------------------------------------------------------------------------------------------------------------------------------------------------------------------------------------------|-------------------------------------------|
| 56 | <b>Leontine van der Meer, Anna Petra Nieboer, Harry Finkenflugel, Jane Murray Cramm.</b> The importance of person-centred care and co-creation of care for the well-being and job satisfaction of professionals working with people with intellectual disabilities.. <i>Scandinavian journal of caring sciences</i> . 2018//. 32:76                                                  | Level 1, Form<br>Title/abstract<br>screen |
| 57 | <b>Leigh Chapman.</b> Lessons Learned After Losing my Brother to an Overdose: A Call to Action for Nurse Leaders.. <i>Nursing leadership (Toronto, Ont.)</i> . 2017//. 30:73                                                                                                                                                                                                         | Level 2, Form<br>Full Text<br>Screening   |
| 58 | <b>Craig Warlick, Kimber P Richter, Delwyn Catley, Byron J Gajewski, Laura E Martin, Laura M Mussulman.</b> Two brief valid measures of therapeutic alliance in counseling for tobacco dependence.. <i>Journal of substance abuse treatment</i> . 2018//. 86:60                                                                                                                      | Level 2, Form<br>Full Text<br>Screening   |
| 59 | <b>Brett C Bade, Paul B Brasher, Branden W Luna, Gerard A Silvestri, Nichole T Tanner.</b> Reviewing Lung Cancer Screening: The Who, Where, When, Why, and How.. <i>Clinics in chest medicine</i> . 2018//. 39:31                                                                                                                                                                    | Level 1, Form<br>Title/abstract<br>screen |
| 60 | <b>Lisa D Butler, Eugene Maguin, Janice Carello.</b> Retraumatization Mediates the Effect of Adverse Childhood Experiences on Clinical Training-Related Secondary Traumatic Stress Symptoms.. <i>Journal of trauma &amp; dissociation : the official journal of the International Society for the Study of Dissociation (ISSD)</i> . 2018//. 19:25                                   | Level 1, Form<br>Title/abstract<br>screen |
| 61 | <b>Stefano Omboni, Marina Caserini.</b> Effectiveness of pharmacist's intervention in the management of cardiovascular diseases.. <i>Open heart</i> . 2018//. 5:e000687                                                                                                                                                                                                              | Level 1, Form<br>Title/abstract<br>screen |
| 62 | <b>Roger Lee Mendoza.</b> Is medical treatment of Alcohol Withdrawal Syndrome a Stag Hunt? Challenges and opportunities in managing risk and uncertainty in addiction cessation.. <i>Risk management and healthcare policy</i> . 2018//. 11:1                                                                                                                                        | Level 1, Form<br>Title/abstract<br>screen |
| 63 | <b>Allison J Ober, Katherine E Watkins, Sarah B Hunter, Brett Ewing, Karen Lamp, Mimi Lind, Kirsten Becker, Keith Heinzerling, Karen C Osilla, Allison L Diamant, Claude M Setodji.</b> Assessing and improving organizational readiness to implement substance use disorder treatment in primary care: findings from the SUMMIT study.. <i>BMC family practice</i> . 2017//. 18:107 | Level 1, Form<br>Title/abstract<br>screen |
| 64 | <b>S Ryan Greysen, James D Harrison, Sunil Kripalani, Eduard Vasilevskis, Edmondo Robinson, Joshua Metlay, Jeffery L Schnipper, David Meltzer, Neil Sehgal, Gregory W Ruhnke, Mark V Williams, Andrew D Auerbach.</b> Understanding patient-centred readmission factors: a multi-site, mixed-methods study.. <i>BMJ quality &amp; safety</i> . 2017//. 26:33                         | Level 1, Form<br>Title/abstract<br>screen |
| 65 | <b>Fernea Moyo, Ella Archibald, Jason T Slyer.</b> Effectiveness of decision aids on smoking cessation in adult patients: a systematic review protocol.. <i>JBPI database of systematic reviews and implementation reports</i> . 2017//. 15:2881                                                                                                                                     | Level 2, Form<br>Full Text<br>Screening   |
| 66 | <b>Thomas R Hickey, Paul D Kirwin, Elizabeth C Gardner, Jessica Feinleib.</b> Patient-Centered Perioperative Care for a Victim of Military Sexual Trauma.. <i>Military medicine</i> . 2017//. 182:e1807                                                                                                                                                                              | Level 1, Form<br>Title/abstract<br>screen |
| 67 | <b>P Thomas, J M Thomas.</b> [Specificity of communication in general practice].. <i>Revue medicale de Bruxelles</i> . 2017//. 38:377                                                                                                                                                                                                                                                | Level 1, Form<br>Title/abstract<br>screen |
| 68 | <b>Daniel R Witt, Gregory M Garrison, Cesar A Gonzalez, Terrence J Witt, Kurt B Angstman.</b> Six-Month Outcomes for Collaborative Care Management of Depression Among Smoking and Nonsmoking Patients.. <i>Health services research and managerial epidemiology</i> . 2017//. 4:2333392817721648                                                                                    | Level 1, Form<br>Title/abstract<br>screen |

|    |                                                                                                                                                                                                                                                                                                                                                                                                    |                                           |
|----|----------------------------------------------------------------------------------------------------------------------------------------------------------------------------------------------------------------------------------------------------------------------------------------------------------------------------------------------------------------------------------------------------|-------------------------------------------|
| 69 | <b>Clara Iversen.</b> Now or never: smoking cessation discussions in the face of serious illness.. <i>Sociology of health &amp; illness</i> . 2017//. 39:1330                                                                                                                                                                                                                                      | Level 1, Form<br>Title/abstract<br>screen |
| 70 | <b>Dawn I Velligan, Martha Sajatovic, Ainslie Hatch, Pavel Kramata, John P Docherty.</b> Why do psychiatric patients stop antipsychotic medication? A systematic review of reasons for nonadherence to medication in patients with serious mental illness.. <i>Patient preference and adherence</i> . 2017//. 11:449                                                                               | Level 1, Form<br>Title/abstract<br>screen |
| 71 | <b>Pablo Barrio, Lidia Teixidor, Lluisa Ortega, Merce Balcells, Eduard Vieta, Antoni Gual.</b> Patients' Knowledge and Attitudes Towards Regular Alcohol Urine Screening: A Survey Study.. <i>Journal of addiction medicine</i> . 2017//. 11:300                                                                                                                                                   | Level 1, Form<br>Title/abstract<br>screen |
| 72 | <b>Kirsten Marchand, Eugenia Oviedo-Joekes.</b> Prioritizing the patient in patient-centered addictions treatment.. <i>Addiction (Abingdon, England)</i> . 2017//. 112:466                                                                                                                                                                                                                         | Level 1, Form<br>Title/abstract<br>screen |
| 73 | <b>Torsten Kolind, Morten Hesse.</b> Patient-centred care-perhaps the future of substance abuse treatment.. <i>Addiction (Abingdon, England)</i> . 2017//. 112:465                                                                                                                                                                                                                                 | Level 1, Form<br>Title/abstract<br>screen |
| 74 | <b>Emma Broglia, Abigail Millings, Michael Barkham.</b> Comparing counselling alone versus counselling supplemented with guided use of a well-being app for university students experiencing anxiety or depression (CASELOAD): protocol for a feasibility trial.. <i>Pilot and feasibility studies</i> . 2017//. 3:3                                                                               | Level 1, Form<br>Title/abstract<br>screen |
| 75 | <b>Carol J Strike, Adrian Guta.</b> Patient-centred care and patient engagement to inform the use of psychosocial interventions with opioid substitution treatment: another path for Day & Mitcheson to follow.. <i>Addiction (Abingdon, England)</i> . 2017//. 112:1338                                                                                                                           | Level 1, Form<br>Title/abstract<br>screen |
| 76 | <b>Carolyn Y Fang, Carolyn J Heckman.</b> Informational and Support Needs of Patients with Head and Neck Cancer: Current Status and Emerging Issues.. <i>Cancers of the head &amp; neck</i> . 2016//. 1:#pages#                                                                                                                                                                                    | Level 1, Form<br>Title/abstract<br>screen |
| 77 | <b>Sarah Masefield, Pippa Powell, Carlos Jimenez-Ruiz, Peter Hajek, Keir Lewis, Stefan Andreas, Philip Tonnesen, Onno van Schayck, Christina Gratziou, Bertrand Dautzenberg, Serena Tonstad, Thomas Hering, Stephano Nardini, Monica Fletcher.</b> Recommendations to improve smoking cessation outcomes from people with lung conditions who smoke.. <i>ERJ open research</i> . 2016//. 2:#pages# | Level 1, Form<br>Title/abstract<br>screen |
| 79 | <b>Udi E Ghitza.</b> Overlapping Mechanisms of Stress-Induced Relapse to Opioid Use Disorder and Chronic Pain: Clinical Implications.. <i>Frontiers in psychiatry</i> . 2016//. 7:80                                                                                                                                                                                                               | Level 1, Form<br>Title/abstract<br>screen |
| 80 | <b>Michael B Steinberg, Daniel P Giovenco, Cristine D Delnevo.</b> Patient-physician communication regarding electronic cigarettes.. <i>Preventive medicine reports</i> . 2015//. 2:96                                                                                                                                                                                                             | Level 1, Form<br>Title/abstract<br>screen |
| 81 | <b>Michael B Seidman, Robert D Vining, Stacie A Salsbury.</b> Collaborative care for a patient with complex low back pain and long-term tobacco use: a case report.. <i>The Journal of the Canadian Chiropractic Association</i> . 2015//. 59:216                                                                                                                                                  | Level 1, Form<br>Title/abstract<br>screen |
| 82 | <b>Peter M Haddad, Cecilia Brain, Jan Scott.</b> Nonadherence with antipsychotic medication in schizophrenia: challenges and management strategies.. <i>Patient related outcome measures</i> . 2014//. 5:43                                                                                                                                                                                        | Level 1, Form<br>Title/abstract<br>screen |
| 83 | <b>Masoomeh Maarefvand, Hamid Reza Ghiasvand, Hamed Ekhtiari.</b> Drug Craving Terminology among Opiate Dependents; A Mixed Method Study.. <i>Iranian journal of psychiatry</i> . 2013//. 8:97                                                                                                                                                                                                     | Level 1, Form<br>Title/abstract<br>screen |

|     |                                                                                                                                                                                                                                                                                                                     |                                           |
|-----|---------------------------------------------------------------------------------------------------------------------------------------------------------------------------------------------------------------------------------------------------------------------------------------------------------------------|-------------------------------------------|
| 85  | <b>Niki A Miller, Lisa M Najavits.</b> Creating trauma-informed correctional care: a balance of goals and environment.. <i>European journal of psychotraumatology</i> . 2012//. 3:#pages#                                                                                                                           | Level 1, Form<br>Title/abstract<br>screen |
| 90  | <b>Philippe Nuss, Martina Hummer, Cedric Tessier.</b> The use of amisulpride in the treatment of acute psychosis.. <i>Therapeutics and clinical risk management</i> . 2007//. 3:3                                                                                                                                   | Level 1, Form<br>Title/abstract<br>screen |
| 91  | <b>Avram H Mack, Richard J Frances.</b> Treatment of alcohol use disorders in adolescents.. <i>Journal of psychiatric practice</i> . 2003//. 9:195                                                                                                                                                                  | Level 1, Form<br>Title/abstract<br>screen |
| 92  | <b>K T Mueser, D L Noordsy, R E Drake, L Fox.</b> [Integrated treatment for severe mental illness and substance abuse: Effective components of programs for persons with co-occurring disorders.].. <i>Sante mentale au Quebec</i> . 2001//. 26:22                                                                  | Level 2, Form<br>Full Text<br>Screening   |
| 93  | <b>D Naber, S Kasper.</b> The importance of treatment acceptability to patients.. <i>International journal of psychiatry in clinical practice</i> . 2000//. 4:25                                                                                                                                                    | Level 1, Form<br>Title/abstract<br>screen |
| 94  | <b>A Juntunen, M Hwalek, A V Neale.</b> Tracking and interviewing clients at risk for HIV and substance abuse in a Latino community.. <i>Evaluation and program planning</i> . 1999//. 22:305                                                                                                                       | Level 1, Form<br>Title/abstract<br>screen |
| 95  | <b>L Luborsky, J P Barber, L Siqueland, S Johnson, L M Najavits, A Frank, D Daley.</b> The Revised Helping Alliance Questionnaire (HAq-II) : Psychometric Properties.. <i>The Journal of psychotherapy practice and research</i> . 1996//. 5:260                                                                    | Level 1, Form<br>Title/abstract<br>screen |
| 96  | <b>Davida M Schiff, Barry Zuckerman, Elizabeth Hutton, Carolyn Genatossio, Catherine Michelson, Megan Bair-Merritt.</b> Development and Pilot Implementation of a Trauma-Informed Care Curriculum for Pediatric Residents.. <i>Academic pediatrics</i> . 2017//. 17:794                                             | Level 1, Form<br>Title/abstract<br>screen |
| 97  | <b>Laura E Miller, Scott A Eldredge, Elizabeth D Dalton.</b> "Pain Is What the Patient Says It Is": Nurse-Patient Communication, Information Seeking, and Pain Management.. <i>The American journal of hospice &amp; palliative care</i> . 2017//. 34:966                                                           | Level 1, Form<br>Title/abstract<br>screen |
| 98  | <b>Lauren K Whiteside, Doyanne Darnell, Karlee Jackson, Jin Wang, Joan Russo, Dennis M Donovan, Douglas F Zatzick.</b> Collaborative care from the emergency department for injured patients with prescription drug misuse: An open feasibility study.. <i>Journal of substance abuse treatment</i> . 2017//. 82:12 | Level 1, Form<br>Title/abstract<br>screen |
| 99  | <b>Traci H Abraham, Patricia Wright, Penny White, Brenda M Booth, Michael A Cucciare.</b> Feasibility and acceptability of shared decision-making to promote alcohol behavior change among women Veterans: Results from focus groups.. <i>Journal of addictive diseases</i> . 2017//. 36:252                        | Level 2, Form<br>Full Text<br>Screening   |
| 100 | <b>Samuel F Sestito, Keri L Rodriguez, Shaddy K Saba, James W Conley, Michael A Mitchell, Adam J Gordon.</b> Homeless veterans' experiences with substance use, recovery, and treatment through photo elicitation.. <i>Substance abuse</i> . 2017//. 38:422                                                         | Level 1, Form<br>Title/abstract<br>screen |
| 101 | <b>Davida M Schiff, Barry Zuckerman, Elisha M Wachman, Megan Bair-Merritt.</b> Trainees' knowledge, attitudes, and practices towards caring for the substance-exposed mother-infant dyad.. <i>Substance abuse</i> . 2017//. 38:414                                                                                  | Level 1, Form<br>Title/abstract<br>screen |
| 102 | <b>Gladstone C 2nd McDowell, Joseph Winchell.</b> Role of primary care physicians in intrathecal pain management: a narrative review of the literature.. <i>Postgraduate medicine</i> . 2018//. 130:411                                                                                                             | Level 1, Form<br>Title/abstract<br>screen |
| 103 | <b>Myriam Forster, Timothy J Grigsby, Christopher J Rogers, Stephanie M</b>                                                                                                                                                                                                                                         | Level 1, Form                             |

|     |                                                                                                                                                                                                                                                                                                                                                                                                                                                                                                                                       |                                     |
|-----|---------------------------------------------------------------------------------------------------------------------------------------------------------------------------------------------------------------------------------------------------------------------------------------------------------------------------------------------------------------------------------------------------------------------------------------------------------------------------------------------------------------------------------------|-------------------------------------|
|     | <b>Benjamin.</b> The relationship between family-based adverse childhood experiences and substance use behaviors among a diverse sample of college students.. <i>Addictive behaviors.</i> 2018//. 76:298                                                                                                                                                                                                                                                                                                                              | Title/abstract screen               |
| 104 | <b>Marianne S Matthias, Nicole L Johnson, Cleveland G Shields, Matthew J Bair, Palmer MacKie, Monica Huffman, Stewart C Alexander.</b> "I'm Not Gonna Pull the Rug out From Under You": Patient-Provider Communication About Opioid Tapering.. <i>The journal of pain : official journal of the American Pain Society.</i> 2017//. 18:1365                                                                                                                                                                                            | Level 1, Form Title/abstract screen |
| 105 | <b>Maxine Stitzer, Tim Matheson, Colin Cunningham, James L Sorensen, Daniel J Feaster, Lauren Gooden, Alexis S Hammond, Heather Fitzsimons, Lisa R Metsch.</b> Enhancing patient navigation to improve intervention session attendance and viral load suppression of persons with HIV and substance use: a secondary post hoc analysis of the Project HOPE study.. <i>Addiction science &amp; clinical practice.</i> 2017//. 12:16                                                                                                    | Level 1, Form Title/abstract screen |
| 106 | <b>Katharine A Bradley, Evette Joy Ludman, Laura J Chavez, Jennifer F Bobb, Susan J Ruedebusch, Carol E Achtmeyer, Joseph O Merrill, Andrew J Saxon, Ryan M Caldeiro, Diane M Greenberg, Amy K Lee, Julie E Richards, Rachel M Thomas, Theresa E Matson, Emily C Williams, Eric Hawkins, Gwen Lapham, Daniel R Kivlahan.</b> Patient-centered primary care for adults at high risk for AUDs: the Choosing Healthier Drinking Options In primary CarE (CHOICE) trial.. <i>Addiction science &amp; clinical practice.</i> 2017//. 12:15 | Level 2, Form Full Text Screening   |
| 107 | <b>Ryan P Westergaard, Andrew Genz, Kristen Panico, Pamela J Surkan, Jeanne Keruly, Heidi E Hutton, Larry W Chang, Gregory D Kirk.</b> Acceptability of a mobile health intervention to enhance HIV care coordination for patients with substance use disorders.. <i>Addiction science &amp; clinical practice.</i> 2017//. 12:11                                                                                                                                                                                                     | Level 1, Form Title/abstract screen |
| 108 | <b>Brittini N Howard, Richard Van Dorn, Bronwyn J Myers, William A Zule, Felicia A Browne, Tara Carney, Wendee M Wechsberg.</b> Barriers and facilitators to implementing an evidence-based woman-focused intervention in South African health services.. <i>BMC health services research.</i> 2017//. 17:746                                                                                                                                                                                                                         | Level 1, Form Title/abstract screen |
| 109 | <b>Jan Gryczynski, Courtney D Nordeck, Shannon Gwin Mitchell, Kathleen R Page, Luke L Johnsen, Kevin E O'Grady, Robert P Schwartz.</b> Pilot Studies Examining Feasibility of Substance Use Disorder Screening and Treatment Linkage at Urban Sexually Transmitted Disease Clinics.. <i>Journal of addiction medicine.</i> 2017//. 11:350                                                                                                                                                                                             | Level 1, Form Title/abstract screen |
| 110 | <b>Jeffry Shaefer, Antje M Barreveld, Paul Arnstein, Ronald J Kulich.</b> Interprofessional Education for the Dentist in Managing Acute and Chronic Pain.. <i>Dental clinics of North America.</i> 2016//. 60:825                                                                                                                                                                                                                                                                                                                     | Level 1, Form Title/abstract screen |
| 111 | <b>Leena Mittal, Joji Suzuki.</b> Feasibility of collaborative care treatment of opioid use disorders with buprenorphine during pregnancy.. <i>Substance abuse.</i> 2017//. 38:261                                                                                                                                                                                                                                                                                                                                                    | Level 1, Form Title/abstract screen |
| 112 | <b>Ellen L Bassuk, Rachel E Latta, Robert Sember, Sheela Raja, Molly Richard.</b> Universal Design for Underserved Populations: Person-Centered, Recovery-Oriented and Trauma Informed.. <i>Journal of health care for the poor and underserved.</i> 2017//. 28:896                                                                                                                                                                                                                                                                   | Level 1, Form Title/abstract screen |
| 113 | <b>Evan Senreich.</b> The Perceptions of White Clients in a Substance Abuse Program in Which They Are in the Minority.. <i>Substance use &amp; misuse.</i> 2017//. 52:34                                                                                                                                                                                                                                                                                                                                                              | Level 1, Form Title/abstract screen |
| 114 | <b>Michael J Silverman.</b> Effects of Live and Educational Music Therapy on                                                                                                                                                                                                                                                                                                                                                                                                                                                          | Level 2, Form                       |



|     |                                                                                                                                                                                                                                                                                                                                                                                                                                |                                     |
|-----|--------------------------------------------------------------------------------------------------------------------------------------------------------------------------------------------------------------------------------------------------------------------------------------------------------------------------------------------------------------------------------------------------------------------------------|-------------------------------------|
|     | Working Alliance and Trust With Patients on Detoxification Unit: A Four-Group Cluster-Randomized Trial.. <i>Substance use &amp; misuse</i> . 2016//. 51:1741                                                                                                                                                                                                                                                                   | Full Text Screening                 |
| 115 | <b>Frances J Kay-Lambkin, Amanda L Baker, Kerrin Palazzi, Terry J Lewin, Brian J Kelly.</b> Therapeutic Alliance, Client Need for Approval, and Perfectionism as Differential Moderators of Response to eHealth and Traditionally Delivered Treatments for Comorbid Depression and Substance Use Problems.. <i>International journal of behavioral medicine</i> . 2017//. 24:728                                               | Level 2, Form Full Text Screening   |
| 116 | <b>Pablo Barrio, Lluisa Ortega, Hugo Lopez, Antoni Gual.</b> Self-management and Shared Decision-Making in Alcohol Dependence via a Mobile App: a Pilot Study.. <i>International journal of behavioral medicine</i> . 2017//. 24:722                                                                                                                                                                                           | Level 1, Form Title/abstract screen |
| 117 | <b>David E Gerber, Heidi A Hamann, Noel O Santini, Suhny Abbara, Hsienchang Chiu, Molly McGuire, Lisa Quirk, Hong Zhu, Simon J Craddock Lee.</b> Patient navigation for lung cancer screening in an urban safety-net system: Protocol for a pragmatic randomized clinical trial.. <i>Contemporary clinical trials</i> . 2017//. 60:78                                                                                          | Level 1, Form Title/abstract screen |
| 118 | <b>A C Sweetland, A Kritski, M A Oquendo, M E Sublette, A Norcini Pala, L R Batista Silva, A Karpati, E C Silva, M O Moraes, J R Lapa E Silva, M L Wainberg.</b> Addressing the tuberculosis-depression syndemic to end the tuberculosis epidemic.. <i>The international journal of tuberculosis and lung disease : the official journal of the International Union against Tuberculosis and Lung Disease</i> . 2017//. 21:852 | Level 1, Form Title/abstract screen |
| 119 | <b>C Susana Caxaj, Navjot K Gill.</b> Belonging and Mental Wellbeing Among a Rural Indian-Canadian Diaspora: Navigating Tensions in "Finding a Space of Our Own".. <i>Qualitative health research</i> . 2017//. 27:1119                                                                                                                                                                                                        | Level 1, Form Title/abstract screen |
| 120 | <b>Ken Thorpe, Sanjula Jain, Peter Joski.</b> Prevalence And Spending Associated With Patients Who Have A Behavioral Health Disorder And Other Conditions.. <i>Health affairs (Project Hope)</i> . 2017//. 36:124                                                                                                                                                                                                              | Level 1, Form Title/abstract screen |
| 121 | <b>Viviane Ben Nifla, Philippe Celli, Helene Samba, Cecile Vincent.</b> [Day clinic, a gateway towards risk reduction].. <i>Revue de l'infirmiere</i> . 2018//. 67:28                                                                                                                                                                                                                                                          | Level 1, Form Title/abstract screen |
| 122 | <b>Kara Zivin, Benjamin F Miller, Bruce Finke, Asaf Bitton, Perry Payne, Edith C Stowe, Ashok Reddy, Timothy J Day, Pauline Lapin, Janel L Jin, Laura L Sessums.</b> Behavioral Health and the Comprehensive Primary Care (CPC) Initiative: findings from the 2014 CPC behavioral health survey.. <i>BMC health services research</i> . 2017//. 17:612                                                                         | Level 1, Form Title/abstract screen |
| 123 | <b>Brendan J Clark, Jacqueline Jones, K Diandra Reed, Rachel Hodapp, Ivor S Douglas, David Van Pelt, Ellen L Burnham, Marc Moss.</b> The Experience of Patients with Alcohol Misuse after Surviving a Critical Illness. A Qualitative Study.. <i>Annals of the American Thoracic Society</i> . 2017//. 14:1154                                                                                                                 | Level 2, Form Full Text Screening   |
| 124 | <b>Timothy F Mott.</b> Lung Cancer: Screening and Evaluation of Patients With Solitary Pulmonary Nodules.. <i>FP essentials</i> . 2018//. 464:17                                                                                                                                                                                                                                                                               | Level 1, Form Title/abstract screen |
| 125 | <b>Thomas J Stopka, Marguerite Hutcheson, Ashley Donahue.</b> Access to healthcare insurance and healthcare services among syringe exchange program clients in Massachusetts: qualitative findings from health navigators with the iDU ("I do") Care Collaborative.. <i>Harm reduction journal</i> . 2017//. 14:26                                                                                                             | Level 1, Form Title/abstract screen |
| 126 | <b>Christine N Runyan, Amber L Hewitt, Stephen A Martin, Daniel Mullin.</b> Confronting the new epidemic: Integrated care for opioid use disorders.. <i>Families, systems &amp; health : the journal of collaborative family healthcare</i> . 2017//. 35:248                                                                                                                                                                   | Level 1, Form Title/abstract screen |

|     |                                                                                                                                                                                                                                                                                                                                                   |                                           |
|-----|---------------------------------------------------------------------------------------------------------------------------------------------------------------------------------------------------------------------------------------------------------------------------------------------------------------------------------------------------|-------------------------------------------|
| 127 | <b>Julie Blandthorn, Katie James, Ellen Bowman, Yvonne Bonomo, Lisa H Amir.</b> Two Case Studies Illustrating a Shared Decision-Making Approach to Illicit Methamphetamine Use and Breastfeeding.. <i>Breastfeeding medicine : the official journal of the Academy of Breastfeeding Medicine</i> . 2017//. 12:381                                 | Level 1, Form<br>Title/abstract<br>screen |
| 129 | <b>Ramin Asgary, Ramesh Naderi, Juan Wisnivesky.</b> Opt-Out Patient Navigation to Improve Breast and Cervical Cancer Screening Among Homeless Women.. <i>Journal of women's health (2002)</i> . 2017//. 26:999                                                                                                                                   | Level 1, Form<br>Title/abstract<br>screen |
| 130 | <b>Patrick W Corrigan, Dana J Kraus, Susan A Pickett, Annie Schmidt, Ed Stellan, Erin Hantke, Juana Lorena Lara.</b> Using Peer Navigators to Address the Integrated Health Care Needs of Homeless African Americans With Serious Mental Illness.. <i>Psychiatric services (Washington, D.C.)</i> . 2017//. 68:264                                | Level 1, Form<br>Title/abstract<br>screen |
| 132 | <b>Ed Day, Luke Mitcheson.</b> Psychosocial interventions in opiate substitution treatment services: does the evidence provide a case for optimism or nihilism?.. <i>Addiction (Abingdon, England)</i> . 2017//. 112:1329                                                                                                                         | Level 1, Form<br>Title/abstract<br>screen |
| 133 | <b>Audrey L Jones, Maria K Mor, John P Cashy, Adam J Gordon, Gretchen L Haas, James H Jr Schaefer, Leslie R M Hausmann.</b> Racial/Ethnic Differences in Primary Care Experiences in Patient-Centered Medical Homes among Veterans with Mental Health and Substance Use Disorders.. <i>Journal of general internal medicine</i> . 2016//. 31:1435 | Level 1, Form<br>Title/abstract<br>screen |
| 134 | <b>Rob J Fredericksen, Todd C Edwards, Jessica S Merlin, Laura E Gibbons, Deepa Rao, D Scott Batey, Lydia Dant, Edgar Paez, Anna Church, Paul K Crane, Heidi M Crane, Donald L Patrick.</b> Patient and provider priorities for self-reported domains of HIV clinical care.. <i>AIDS care</i> . 2015//. 27:1255                                   | Level 1, Form<br>Title/abstract<br>screen |
| 135 | <b>Ursula Running Bear, Janette Beals, Douglas K Novins, Spero M Manson.</b> Alcohol detoxification completion, acceptance of referral to substance abuse treatment, and entry into substance abuse treatment among Alaska Native people.. <i>Addictive behaviors</i> . 2017//. 65:25                                                             | Level 1, Form<br>Title/abstract<br>screen |
| 136 | <b>Elizabeth Bridges, Margaret M McNeill, Nancy Munro.</b> Research in Review: Advancing Critical Care Practice.. <i>American journal of critical care : an official publication, American Association of Critical-Care Nurses</i> . 2016//. 26:77                                                                                                | Level 1, Form<br>Title/abstract<br>screen |
| 138 | <b>Robin M A Clarke, Jessica Jeffrey, Mark Grossman, Thomas Strouse, Michael Gitlin, Samuel A Skootsky.</b> Delivering On Accountable Care: Lessons From A Behavioral Health Program To Improve Access And Outcomes.. <i>Health affairs (Project Hope)</i> . 2016//. 35:1487                                                                      | Level 1, Form<br>Title/abstract<br>screen |
| 139 | <b>Colleen L Barry, Andrew J Epstein, David A Fiellin, Liana Fraenkel, Susan H Busch.</b> Estimating demand for primary care-based treatment for substance and alcohol use disorders.. <i>Addiction (Abingdon, England)</i> . 2016//. 111:1376                                                                                                    | Level 1, Form<br>Title/abstract<br>screen |
| 140 | <b>Susan W Krigel, James E Grobe, Kathy Goggin, Kari Jo Harris, Jose L Moreno, Delwyn Catley.</b> Motivational interviewing and the decisional balance procedure for cessation induction in smokers not intending to quit.. <i>Addictive behaviors</i> . 2017//. 64:171                                                                           | Level 2, Form<br>Full Text<br>Screening   |
| 141 | <b>Allyson Kelley, LaDawn K Medicine Bull, Gary LaFranier.</b> Participatory visual methods for American Indian communities and mental health conversations.. <i>American Indian and Alaska native mental health research (Online)</i> . 2016//. 23:47                                                                                            | Level 1, Form<br>Title/abstract<br>screen |
| 142 | <b>Ramzi G Salloum, Kayla R Getz, Andy S L Tan, Lisa Carter-Harris, Kelly C Young-Wolff, Thomas J Jr George, Elizabeth A Shenkman.</b> Use of Electronic Cigarettes Among Cancer Survivors in the U.S.. <i>American journal of preventive medicine</i> . 2016//. 51:762                                                                           | Level 1, Form<br>Title/abstract<br>screen |

|     |                                                                                                                                                                                                                                                                                                                                                                                                                                                                                                         |                                           |
|-----|---------------------------------------------------------------------------------------------------------------------------------------------------------------------------------------------------------------------------------------------------------------------------------------------------------------------------------------------------------------------------------------------------------------------------------------------------------------------------------------------------------|-------------------------------------------|
| 143 | <b>Hiroyuki Kimura, Yasuharu Onishi, Shinichi Kishi, Nobuhiko Kurata, Satoshi Ogiso, Hideya Kamei, Chisato Tsuboi, Naoko Yamaguchi, Azusa Shiga, Mai Kondo, Yushun Yokoyama, Fumika Takasato, Hiroshige Fujishiro, Kanako Ishizuka, Takashi Okada, Yasuhiro Ogura, Norio Ozaki.</b> Successful Post-Transplant Psychiatric Interventions During Long-Term Follow-Up of Patients Receiving Liver Transplants for Alcoholic Liver Disease.. <i>The American journal of case reports</i> . 2017//. 18:1215 | Level 1, Form<br>Title/abstract<br>screen |
| 144 | <b>Gail L Rose, Gary J Badger, Joan M Skelly, Tonya A Ferraro, Charles D MacLean, John E Helzer.</b> A Randomized Controlled Trial of IVR-Based Alcohol Brief Intervention to Promote Patient-Provider Communication in Primary Care.. <i>Journal of general internal medicine</i> . 2016//. 31:996                                                                                                                                                                                                     | Level 1, Form<br>Title/abstract<br>screen |
| 145 | <b>Cati G Brown-Johnson, Andrea Burbank, Eric J Daza, Arianna Wassmann, Amy Chieng, Geoffrey W Rutledge, Judith J Prochaska.</b> Online Patient-Provider E-cigarette Consultations: Perceptions of Safety and Harm.. <i>American journal of preventive medicine</i> . 2016//. 51:882                                                                                                                                                                                                                    | Level 1, Form<br>Title/abstract<br>screen |
| 146 | <b>Noe Garin, Beatriz Zurita, Cesar Velasco, Anna Feliu, Mar Gutierrez, Montserrat Masip, M Antonia Mangués.</b> Prevalence and clinical impact of recreational drug consumption in people living with HIV on treatment: a cross-sectional study.. <i>BMJ open</i> . 2017//. 7:e014105                                                                                                                                                                                                                  | Level 1, Form<br>Title/abstract<br>screen |
| 147 | <b>Neeti M Kanodra, Charlene Pope, Chanita H Halbert, Gerard A Silvestri, LaShanta J Rice, Nichole T Tanner.</b> Primary Care Provider and Patient Perspectives on Lung Cancer Screening. A Qualitative Study.. <i>Annals of the American Thoracic Society</i> . 2016//. 13:1977                                                                                                                                                                                                                        | Level 1, Form<br>Title/abstract<br>screen |
| 148 | <b>Amandine Petit, Vanessa Risler.</b> [The group connected bike to help fight addiction].. <i>Soins. Psychiatrie</i> . 2017//. 38:34                                                                                                                                                                                                                                                                                                                                                                   | Level 1, Form<br>Title/abstract<br>screen |
| 149 | <b>Matthew Tobey, Julia Manasson, Kristen Decarlo, Katrina Ciraldo-Maryniuk, Jessie M Gaeta, Erica Wilson.</b> Homeless Individuals Approaching the End of Life: Symptoms and Attitudes.. <i>Journal of pain and symptom management</i> . 2017//. 53:738                                                                                                                                                                                                                                                | Level 1, Form<br>Title/abstract<br>screen |
| 150 | <b>Joseph V Pergolizzi, Frederick A Curro, Nanada Col, Mary Papa Ghods, Don Vena, Robert Taylor, Frederick Naftolin, Jo Ann LeQuang.</b> A multicentre evaluation of an opioid patient-provider agreement.. <i>Postgraduate medical journal</i> . 2017//. 93:613                                                                                                                                                                                                                                        | Level 1, Form<br>Title/abstract<br>screen |
| 151 | <b>Wynne Callon, Mary Catherine Beach, Somnath Saha, Geetanjali Chander, Ira B Wilson, Michael Barton Laws, Victoria Sharp, Jonathan Cohn, Richard Moore, P Todd Korthuis.</b> Assessing Problematic Substance Use in HIV Care: Which Questions Elicit Accurate Patient Disclosures?.. <i>Journal of general internal medicine</i> . 2016//. 31:1141                                                                                                                                                    | Level 1, Form<br>Title/abstract<br>screen |
| 152 | <b>Marsha Stanton, Daniel C McClughen.</b> The CDC Guideline and its Impact on Delivering Patient-Centered Care.. <i>Pain management nursing : official journal of the American Society of Pain Management Nurses</i> . 2017//. 18:270                                                                                                                                                                                                                                                                  | Level 1, Form<br>Title/abstract<br>screen |
| 153 | <b>Kasey Claborn, Sara Becker, Susan Ramsey, Josiah Rich, Peter D Friedmann.</b> Mobile technology intervention to improve care coordination between HIV and substance use treatment providers: development, training, and evaluation protocol.. <i>Addiction science &amp; clinical practice</i> . 2017//. 12:8                                                                                                                                                                                        | Level 1, Form<br>Title/abstract<br>screen |
| 154 | <b>Marjon van Rijn, Jacqueline J Suijker, Wietske Bol, Eva Hoff, Gerben Ter Riet, Sophia E de Rooij, Eric P Moll van Charante, Bianca M Buurman.</b> Comprehensive geriatric assessment: recognition of identified geriatric conditions by community-dwelling older persons.. <i>Age and ageing</i> . 2016//.                                                                                                                                                                                           | Level 1, Form<br>Title/abstract<br>screen |

|     |                                                                                                                                                                                                                                                                                                                                                                                                      |                                     |
|-----|------------------------------------------------------------------------------------------------------------------------------------------------------------------------------------------------------------------------------------------------------------------------------------------------------------------------------------------------------------------------------------------------------|-------------------------------------|
|     | 45:894                                                                                                                                                                                                                                                                                                                                                                                               |                                     |
| 156 | <b>Karin V Rhodes, Simon Basseyn, Robert Gallop, Elizabeth Noll, Aileen Rothbard, Paul Crits-Christoph.</b> Pennsylvania's Medical Home Initiative: Reductions in Healthcare Utilization and Cost Among Medicaid Patients with Medical and Psychiatric Comorbidities.. <i>Journal of general internal medicine.</i> 2016//. 31:1373                                                                  | Level 1, Form Title/abstract screen |
| 157 | <b>Magdalena Kulesza, Katherine E Watkins, Allison J Ober, Karen C Osilla, Brett Ewing.</b> Internalized stigma as an independent risk factor for substance use problems among primary care patients: Rationale and preliminary support.. <i>Drug and alcohol dependence.</i> 2017//. 180:52                                                                                                         | Level 1, Form Title/abstract screen |
| 158 | <b>Ruthanne Marcus, Iuliia Makarenko, Alyona Mazhnaya, Alexei Zelenev, Maxim Polonsky, Lynn Madden, Sergii Filippovych, Sergii Dvoriak, Sandra A Springer, Frederick L Altice.</b> Patient preferences and extended-release naltrexone: A new opportunity to treat opioid use disorders in Ukraine.. <i>Drug and alcohol dependence.</i> 2017//. 179:213                                             | Level 1, Form Title/abstract screen |
| 160 | <b>Carrie M Farmer, Shauna Stahlman, Kimberly A Hepner.</b> "You Should Drink Less": Frequency and Predictors of Discussions Between Providers and Patients About Reducing Alcohol Use.. <i>Substance use &amp; misuse.</i> 2017//. 52:139                                                                                                                                                           | Level 1, Form Title/abstract screen |
| 161 | <b>Traci H Abraham, Eleanor T Lewis, Karen L Drummond, Christine Timko, Michael A Cucciare.</b> Providers' perceptions of barriers and facilitators to disclosure of alcohol use by women veterans.. <i>Primary health care research &amp; development.</i> 2017//. 18:64                                                                                                                            | Level 1, Form Title/abstract screen |
| 162 | <b>Heather Palis, Kirsten Marchand, Defen Peng, Jill Fikowski, Scott Harrison, Patricia Spittal, Martin T Schechter, Eugenia Oviedo-Joekes.</b> Factors Associated with Perceived Abuse in the Health Care System Among Long-Term Opioid Users: A Cross-Sectional Study.. <i>Substance use &amp; misuse.</i> 2016//. 51:763                                                                          | Level 1, Form Title/abstract screen |
| 163 | <b>Will Damon, Will Small, Solanna Anderson, Lisa Maher, Evan Wood, Thomas Kerr, Ryan McNeil.</b> 'Crisis' and 'everyday' initiators: A qualitative study of coercion and agency in the context of methadone maintenance treatment initiation.. <i>Drug and alcohol review.</i> 2017//. 36:253                                                                                                       | Level 2, Form Full Text Screening   |
| 164 | <b>Rongchong Huang, Xiantao Song, Haishan Zhang, Wen Tian, Zheng Huang, Xingwei Zhang, Junqing Yang, Dongfeng Zhang, Jian Wu, Lei Zhong, Henry H Ting, SOS-COMEDY investigators.</b> The success of opening single chronic total occlusion lesions to improve myocardial viability trial (SOS-COMEDY): Study protocol of a prospective multicenter study.. <i>Medicine.</i> 2018//. 97:e0443         | Level 1, Form Title/abstract screen |
| 166 | <b>Inge Petersen, Lara Fairall, Arvin Bhana, Tasneem Kathree, One Selohilwe, Carrie Brooke-Sumner, Gill Faris, Erica Breuer, Nomvula Sibanyoni, Crick Lund, Vikram Patel.</b> Integrating mental health into chronic care in South Africa: the development of a district mental healthcare plan.. <i>The British journal of psychiatry : the journal of mental science.</i> 2016//. 208 Suppl 56:s29 | Level 1, Form Title/abstract screen |
| 167 | <b>Vikram Patel, Somnath Chatterji.</b> Integrating Mental Health In Care For Noncommunicable Diseases: An Imperative For Person-Centered Care.. <i>Health affairs (Project Hope).</i> 2015//. 34:1498                                                                                                                                                                                               | Level 1, Form Title/abstract screen |
| 168 | <b>Debbie Zagami, Jessica Hockenhull, Alanna Bodger, Krishna Bajee Sriram.</b> Communication of Pulmonary Function Test Results: A Survey of Patient's Preferences.. <i>PLoS one.</i> 2015//. 10:e0126617                                                                                                                                                                                            | Level 1, Form Title/abstract screen |
| 169 | <b>Donna M Evon, Carol E Golin, Paul Stewart, Michael W Fried, Shani</b>                                                                                                                                                                                                                                                                                                                             | Level 1, Form                       |

|     |                                                                                                                                                                                                                                                                                                                                                                                                                   |                                         |
|-----|-------------------------------------------------------------------------------------------------------------------------------------------------------------------------------------------------------------------------------------------------------------------------------------------------------------------------------------------------------------------------------------------------------------------|-----------------------------------------|
|     | <b>Alston, Bryce Reeve, Anna S Lok, Richard K Sterling, Joseph K Lim, Nancy Reau, Souvik Sarkar, David R Nelson, K R Reddy, Adrian M Di Bisceglie.</b> Patient engagement and study design of PROP UP: A multi-site patient-centered prospective observational study of patients undergoing hepatitis C treatment.. <i>Contemporary clinical trials</i> . 2017//. 57:58                                           | Title/abstract screen                   |
| 170 | <b>Marya Viorst Gwadz, Linda M Collins, Charles M Cleland, Noelle R Leonard, Leo Wilton, Monica Gandhi, R Scott Braithwaite, David C Perlman, Alexandra Kutnick, Amanda S Ritchie.</b> Using the multiphase optimization strategy (MOST) to optimize an HIV care continuum intervention for vulnerable populations: a study protocol.. <i>BMC public health</i> . 2017//. 17:383                                  | Level 1, Form<br>Title/abstract screen  |
| 171 | <b>R J Fredericksen, J Tufano, J Ralston, J McReynolds, M Stewart, W B Lober, K H Mayer, W C Mathews, M J Mugavero, P K Crane, H M Crane.</b> Provider perceptions of the value of same-day, electronic patient-reported measures for use in clinical HIV care.. <i>AIDS care</i> . 2016//. 28:1428                                                                                                               | Level 1, Form<br>Title/abstract screen  |
| 172 | <b>Karriem S Watson, Amanda C Blok, Joanna Buscemi, Yamile Molina, Marian Fitzgibbon, Melissa A Simon, Lance Williams, Kameron Matthews, Jamie L Studts, Sarah E Lillie, Jamie S Ostroff, Lisa Carter-Harris, Robert A Winn.</b> Society of Behavioral Medicine supports implementation of high quality lung cancer screening in high-risk populations.. <i>Translational behavioral medicine</i> . 2016//. 6:669 | Level 1, Form<br>Title/abstract screen  |
| 173 | <b>Sean M Robinson.</b> "Alcoholic" or "Person with alcohol use disorder"? Applying person-first diagnostic terminology in the clinical domain.. <i>Substance abuse</i> . 2017//. 38:9                                                                                                                                                                                                                            | Level 1, Form<br>Title/abstract screen  |
| 174 | <b>Nathan Crick, Joseph M Gabriel.</b> Medical Narrative and the Rhetoric of Identification: The Many Faces of Anna White Dildane.. <i>Health communication</i> . 2016//. 31:1318                                                                                                                                                                                                                                 | Level 2, Form<br>Full Text<br>Screening |
| 175 | <b>Larry Davidson.</b> The Recovery Movement: Implications For Mental Health Care And Enabling People To Participate Fully In Life.. <i>Health affairs (Project Hope)</i> . 2016//. 35:1091                                                                                                                                                                                                                       | Level 1, Form<br>Title/abstract screen  |
| 176 | <b>Amity E Quinn, Anna D Rubinsky, Anne C Fernandez, Hyeouk Chris Hahm, Jeffrey H Samet.</b> A Research Agenda to Advance the Coordination of Care for General Medical and Substance Use Disorders.. <i>Psychiatric services (Washington, D.C.)</i> . 2017//. 68:400                                                                                                                                              | Level 1, Form<br>Title/abstract screen  |
| 177 | <b>Thomas D'Aunno, Harold Pollack, Qixuan Chen, Peter D Friedmann.</b> Linkages Between Patient-centered Medical Homes and Addiction Treatment Organizations: Results From a National Survey.. <i>Medical care</i> . 2017//. 55:379                                                                                                                                                                               | Level 1, Form<br>Title/abstract screen  |
| 178 | <b>Sohini Ghosh, M Bradley Drummond.</b> Electronic cigarettes as smoking cessation tool: are we there?.. <i>Current opinion in pulmonary medicine</i> . 2017//. 23:111                                                                                                                                                                                                                                           | Level 1, Form<br>Title/abstract screen  |
| 179 | <b>Kiara K Spooner, Jason L Salemi, Hamisu M Salihu, Roger J Zoorob.</b> Discharge Against Medical Advice in the United States, 2002-2011.. <i>Mayo Clinic proceedings</i> . 2017//. 92:525                                                                                                                                                                                                                       | Level 1, Form<br>Title/abstract screen  |
| 180 | <b>Susan L Calcaterra, Anne D Drabkin, Reina Doyle, Sarah E Leslie, Ingrid A Binswanger, Joseph W Frank, Jennifer A Reich, Stephen Koester.</b> A Qualitative Study of Hospitalists' Perceptions of Patient Satisfaction Metrics on Pain Management.. <i>Hospital topics</i> . 2017//. 95:18                                                                                                                      | Level 1, Form<br>Title/abstract screen  |
| 181 | <b>G H Horner.</b> Mapping the road to quality collaborative patient care in a behavioral health community treatment center. Avoiding the detours of managed care.. <i>The Psychiatric clinics of North America</i> . 2000//. 23:363                                                                                                                                                                              | Level 1, Form<br>Title/abstract screen  |

|     |                                                                                                                                                                                                                                                                                                                                                                                                                                                                                                                               |                                           |
|-----|-------------------------------------------------------------------------------------------------------------------------------------------------------------------------------------------------------------------------------------------------------------------------------------------------------------------------------------------------------------------------------------------------------------------------------------------------------------------------------------------------------------------------------|-------------------------------------------|
| 182 | <b>J N Chappel, R L DuPont.</b> Twelve-step and mutual-help programs for addictive disorders.. <i>The Psychiatric clinics of North America</i> . 1999//. 22:425                                                                                                                                                                                                                                                                                                                                                               | Level 1, Form<br>Title/abstract<br>screen |
| 183 | <b>Matthew P Romagano, William E Scorza, Stephen E Lammers, Carole Dorr, John C Smulian.</b> Treatment of a Pregnant Patient in a Persistent Vegetative State.. <i>Obstetrics and gynecology</i> . 2017//. 129:107                                                                                                                                                                                                                                                                                                            | Level 1, Form<br>Title/abstract<br>screen |
| 184 | <b>Michele R Decker, Lorie Benning, Kathleen M Weber, Susan G Sherman, Adebola Adedimeji, Tracey E Wilson, Jennifer Cohen, Michael W Plankey, Mardge H Cohen, Elizabeth T Golub.</b> Physical and Sexual Violence Predictors: 20 Years of the Women's Interagency HIV Study Cohort.. <i>American journal of preventive medicine</i> . 2016//. 51:731                                                                                                                                                                          | Level 1, Form<br>Title/abstract<br>screen |
| 185 | <b>Carolyn M Fratto.</b> Trauma-Informed Care for Youth in Foster Care.. <i>Archives of psychiatric nursing</i> . 2016//. 30:439                                                                                                                                                                                                                                                                                                                                                                                              | Level 1, Form<br>Title/abstract<br>screen |
| 186 | <b>Yiwey Shieh, Martin Bohnenkamp.</b> Low-Dose CT Scan for Lung Cancer Screening: Clinical and Coding Considerations.. <i>Chest</i> . 2017//. 152:204                                                                                                                                                                                                                                                                                                                                                                        | Level 1, Form<br>Title/abstract<br>screen |
| 187 | <b>Leiyu Shi, De-Chih Lee, Michelle Chung, Hailun Liang, Diana Lock, Alek Sripipatana.</b> Patient-Centered Medical Home Recognition and Clinical Performance in U.S. Community Health Centers.. <i>Health services research</i> . 2017//. 52:984                                                                                                                                                                                                                                                                             | Level 1, Form<br>Title/abstract<br>screen |
| 188 | <b>Stephanie A Gernant, Rachel Bastien, Andrea Lai.</b> Development and evaluation of a multidisciplinary controlled substances committee within a patient-centered medical home.. <i>Journal of the American Pharmacists Association : JAPhA</i> . 2015//. 55:656                                                                                                                                                                                                                                                            | Level 1, Form<br>Title/abstract<br>screen |
| 189 | <b>Johanna Chapin-Bardales, Travis Sanchez, Gabriela Paz-Bailey, Kathy Hageman, Michael W Spiller, Yadira Rolon-Colon, Sandra Miranda de Leon.</b> Factors Associated With Recent Human Immunodeficiency Virus Testing Among Men Who Have Sex With Men in Puerto Rico, National Human Immunodeficiency Virus Behavioral Surveillance System, 2011.. <i>Sexually transmitted diseases</i> . 2016//. 43:346                                                                                                                     | Level 1, Form<br>Title/abstract<br>screen |
| 190 | <b>Karen E Lasser, Lisa M Quintiliani, Ve Truong, Ziming Xuan, Jennifer Murillo, Cheryl Jean, Lori Pbert.</b> Effect of Patient Navigation and Financial Incentives on Smoking Cessation Among Primary Care Patients at an Urban Safety-Net Hospital: A Randomized Clinical Trial.. <i>JAMA internal medicine</i> . 2017//. 177:1798                                                                                                                                                                                          | Level 1, Form<br>Title/abstract<br>screen |
| 191 | <b>Bryan R Garner, Heather J Gotham, Stephen J Tueller, Elizabeth L Ball, David Kaiser, Patricia Stilen, Kathryn Speck, Denna Vandersloot, Traci R Rieckmann, Michael Chaple, Erika G Martin, Steve Martino.</b> Testing the effectiveness of a motivational interviewing-based brief intervention for substance use as an adjunct to usual care in community-based AIDS service organizations: study protocol for a multisite randomized controlled trial.. <i>Addiction science &amp; clinical practice</i> . 2017//. 12:31 | Level 1, Form<br>Title/abstract<br>screen |
| 192 | <b>Evan Senreich, Lydia P Ogden, Joy Pastan Greenberg.</b> A postgraduation follow-up of social work students trained in "SBIRT": Rates of usage and perceptions of effectiveness.. <i>Social work in health care</i> . 2017//. 56:412                                                                                                                                                                                                                                                                                        | Level 1, Form<br>Title/abstract<br>screen |
| 193 | <b>Yoo Mi Jeong, Cindy B Veldhuis, Frances Aranda, Tonda L Hughes.</b> Racial/ethnic differences in unmet needs for mental health and substance use treatment in a community-based sample of sexual minority women.. <i>Journal of clinical nursing</i> . 2016//. 25:3557                                                                                                                                                                                                                                                     | Level 1, Form<br>Title/abstract<br>screen |

|     |                                                                                                                                                                                                                                                                                                                                                                                                                                                                                                                    |                                           |
|-----|--------------------------------------------------------------------------------------------------------------------------------------------------------------------------------------------------------------------------------------------------------------------------------------------------------------------------------------------------------------------------------------------------------------------------------------------------------------------------------------------------------------------|-------------------------------------------|
| 194 | <b>Lisa Tlach, Caroline Wusten, Anne Daubmann, Sarah Liebherz, Martin Harter, Jorg Dirmaier.</b> Information and decision-making needs among people with mental disorders: a systematic review of the literature.. <i>Health expectations : an international journal of public participation in health care and health policy.</i> 2015//. 18:1856                                                                                                                                                                 | Level 1, Form<br>Title/abstract<br>screen |
| 195 | <b>S Varvin.</b> A retrospective follow-up investigation of a group of schizophrenic patients treated in a psychotherapeutic unit: the Kastanjabakken Study.. <i>Psychopathology.</i> 1991//. 24:336                                                                                                                                                                                                                                                                                                               | Level 1, Form<br>Title/abstract<br>screen |
| 198 | <b>Mary Brolin, Maria Torres, Dominic Hodgkin, Constance Horgan, Margaret Lee, Elizabeth Merrick, Grant Ritter, Lee Panas, Natasha DeMarco, Jonna Hopwood, Andrea Gewirtz, John Straus, Janice Harrington, Nancy Lane.</b> Implementation of Client Incentives within a Recovery Navigation Program.. <i>Journal of substance abuse treatment.</i> 2017//. 72:25                                                                                                                                                   | Level 1, Form<br>Title/abstract<br>screen |
| 199 | <b>Maxine Stitzer, Donald Calsyn, Timothy Matheson, James Sorensen, Lauren Gooden, Lisa Metsch.</b> Development of a Multi-Target Contingency Management Intervention for HIV Positive Substance Users.. <i>Journal of substance abuse treatment.</i> 2017//. 72:66                                                                                                                                                                                                                                                | Level 1, Form<br>Title/abstract<br>screen |
| 200 | <b>Ann-Mari Lofthus, Heidi Westerlund, Dagfinn Bjorgen, Jonas Christoffer Lindstrom, Arnhild Lauveng, Hanne Clausen, Torleif Ruud, Kristin Sverdrvik Heiervang.</b> Are Users Satisfied with Assertive Community Treatment in Spite of Personal Restrictions?.. <i>Community mental health journal.</i> 2016//. 52:891                                                                                                                                                                                             | Level 1, Form<br>Title/abstract<br>screen |
| 202 | <b>David Farabee, Maureen Hillhouse, Timothy Condon, Barbara McCrady, Kathryn McCollister, Walter Ling.</b> Injectable pharmacotherapy for opioid use disorders (IPOD).. <i>Contemporary clinical trials.</i> 2016//. 49:70                                                                                                                                                                                                                                                                                        | Level 1, Form<br>Title/abstract<br>screen |
| 203 | <b>Robert P Schwartz, Sharon M Kelly, Shannon G Mitchell, Laura Dunlap, Gary A Zarkin, Anjalee Sharma, Kevin E O'Grady, Jerome H Jaffe.</b> Interim methadone and patient navigation in jail: Rationale and design of a randomized clinical trial.. <i>Contemporary clinical trials.</i> 2016//. 49:21                                                                                                                                                                                                             | Level 1, Form<br>Title/abstract<br>screen |
| 204 | <b>Redonna K Chandler, Matthew S Finger, David Farabee, Robert P Schwartz, Timothy Condon, Laura J Dunlap, Gary A Zarkin, Kathryn McCollister, Ryan D McDonald, Eugene Laska, David Bennett, Sharon M Kelly, Maureen Hillhouse, Shannon G Mitchell, Kevin E O'Grady, Joshua D Lee.</b> The SOMATICS collaborative: Introduction to a National Institute on Drug Abuse cooperative study of pharmacotherapy for opioid treatment in criminal justice settings.. <i>Contemporary clinical trials.</i> 2016//. 48:166 | Level 1, Form<br>Title/abstract<br>screen |
| 205 | <b>Katherine E Watkins, Allison J Ober, Karen Lamp, Mimi Lind, Claude Setodji, Karen Chan Osilla, Sarah B Hunter, Colleen M McCullough, Kirsten Becker, Praise O Iyiewuare, Allison Diamant, Keith Heinzerling, Harold Alan Pincus.</b> Collaborative Care for Opioid and Alcohol Use Disorders in Primary Care: The SUMMIT Randomized Clinical Trial.. <i>JAMA internal medicine.</i> 2017//. 177:1480                                                                                                            | Level 1, Form<br>Title/abstract<br>screen |
| 206 | <b>Sara L Kornfield, Marian Moseley, Dina Appleby, Courtney L McMickens, Mary D Sammel, C Neill Epperson.</b> Posttraumatic Symptom Reporting and Reported Cigarette Smoking During Pregnancy.. <i>Journal of women's health (2002).</i> 2017//. 26:662                                                                                                                                                                                                                                                            | Level 1, Form<br>Title/abstract<br>screen |
| 207 | <b>Traci Rieckmann, John Muench, Mary Ann McBurnie, Michael C Leo, Phillip Crawford, Daren Ford, Jennifer Stubbs, Conall O'Cleirigh, Kenneth H Mayer, Kevin Fiscella, Nicole Wright, Maya Doe-Simkins, Matthew Cuddeback, Elizabeth Salisbury-Afshar, Christine Nelson.</b>                                                                                                                                                                                                                                        | Level 1, Form<br>Title/abstract<br>screen |

|     |                                                                                                                                                                                                                                                                                                                                             |                                     |
|-----|---------------------------------------------------------------------------------------------------------------------------------------------------------------------------------------------------------------------------------------------------------------------------------------------------------------------------------------------|-------------------------------------|
|     | Medication-assisted treatment for substance use disorders within a national community health center research network.. <i>Substance abuse</i> . 2016//. 37:625                                                                                                                                                                              |                                     |
| 208 | <b>Brian D Kiluk, Kelly Serafini, Tami Frankforter, Charla Nich, Kathleen M Carroll.</b> Only connect: The working alliance in computer-based cognitive behavioral therapy.. <i>Behaviour research and therapy</i> . 2014//. 63:139                                                                                                         | Level 1, Form Title/abstract screen |
| 209 | <b>Ann Elizabeth Montgomery, Dorota Szymkowiak, Dennis Culhane.</b> Gender Differences in Factors Associated with Unsheltered Status and Increased Risk of Premature Mortality among Individuals Experiencing Homelessness.. <i>Women's health issues : official publication of the Jacobs Institute of Women's Health</i> . 2017//. 27:256 | Level 1, Form Title/abstract screen |
| 210 | <b>William G Shadel, Marc N Elliott, Ann C Haas, Amelia M Haviland, Nate Orr, Melissa M Farmer, Sai Ma, Robert Weech-Maldonado, Donna O Farley, Paul D Cleary.</b> Clinician advice to quit smoking among seniors.. <i>Preventive medicine</i> . 2015//. 70:83                                                                              | Level 1, Form Title/abstract screen |
| 211 | <b>Thomas B Richards, Mary C White, Ralph S Caraballo.</b> Lung cancer screening with low-dose computed tomography for primary care providers.. <i>Primary care</i> . 2014//. 41:307                                                                                                                                                        | Level 1, Form Title/abstract screen |
| 212 | <b>Trena I Mukherjee, Jeffrey A Wickersham, Mayur M Desai, Veena Pillai, Adeeba Kamarulzaman, Frederick L Altice.</b> Factors associated with interest in receiving prison-based methadone maintenance therapy in Malaysia.. <i>Drug and alcohol dependence</i> . 2016//. 164:120                                                           | Level 1, Form Title/abstract screen |
| 213 | <b>Daniel Ciccarone, George Jay Unick, Jenny K Cohen, Sarah G Mars, Daniel Rosenblum.</b> Nationwide increase in hospitalizations for heroin-related soft tissue infections: Associations with structural market conditions.. <i>Drug and alcohol dependence</i> . 2016//. 163:126                                                          | Level 1, Form Title/abstract screen |
| 214 | <b>Lindsay Gressard, Amy S DeGross, Thomas B Richards, Stephanie Melillo, Julia Kish-Doto, Christina L Heminger, Elizabeth A Rohan, Kristine Gabuten Allen.</b> A qualitative analysis of smokers' perceptions about lung cancer screening.. <i>BMC public health</i> . 2017//. 17:589                                                      | Level 1, Form Title/abstract screen |
| 215 | <b>Marcel J Casavant.</b> Urine drug screening in adolescents.. <i>Pediatric clinics of North America</i> . 2002//. 49:317                                                                                                                                                                                                                  | Level 1, Form Title/abstract screen |
| 216 | <b>M J Werner.</b> Principles of brief intervention for adolescent alcohol, tobacco, and other drug use.. <i>Pediatric clinics of North America</i> . 1995//. 42:335                                                                                                                                                                        | Level 1, Form Title/abstract screen |
| 217 | <b>Ming Yang, Elizabeth Wu, Huiying Rao, Fanny H Du, Angela Xie, Shanna Cheng, Cassandra Rodd, Andy Lin, Lai Wei, Anna S Lok.</b> A Comparative Study of Liver Disease Care in the USA and Urban and Rural China.. <i>Digestive diseases and sciences</i> . 2016//. 61:2847                                                                 | Level 1, Form Title/abstract screen |
| 218 | <b>Patrick Vijayalakshmy, Candice Hebert, Seth Green, Charlotte L Ingram.</b> Integrated multidisciplinary treatment teams; a mental health model for outpatient settings in the military.. <i>Military medicine</i> . 2011//. 176:986                                                                                                      | Level 1, Form Title/abstract screen |
| 219 | <b>Damon Mitchell, David Joseph Angelone.</b> Assessing the validity of the Stages of Change Readiness and Treatment Eagerness Scale with treatment-seeking military service members.. <i>Military medicine</i> . 2006//. 171:900                                                                                                           | Level 1, Form Title/abstract screen |
| 220 | <b>Jonathan P Singer, Roger D Yusen.</b> Defining patient-reported outcomes in chronic obstructive pulmonary disease: the patient-centered experience.. <i>The Medical clinics of North America</i> . 2012//. 96:767                                                                                                                        | Level 1, Form Title/abstract screen |
| 221 | <b>Adi V Gundlapalli, Andrew Redd, Daniel Bolton, Megan E Vanneman,</b>                                                                                                                                                                                                                                                                     | Level 1, Form                       |



|     |                                                                                                                                                                                                                                                                                                                                                                                                                                                                                                                                                                                                                                                                                                                                                                                                                                                                                                                                                                                                                                                                |                                     |
|-----|----------------------------------------------------------------------------------------------------------------------------------------------------------------------------------------------------------------------------------------------------------------------------------------------------------------------------------------------------------------------------------------------------------------------------------------------------------------------------------------------------------------------------------------------------------------------------------------------------------------------------------------------------------------------------------------------------------------------------------------------------------------------------------------------------------------------------------------------------------------------------------------------------------------------------------------------------------------------------------------------------------------------------------------------------------------|-------------------------------------|
|     | <b>Marjorie E Carter, Erin Johnson, Matthew H Samore, Jamison D Fargo, Thomas P O'Toole.</b> Patient-aligned Care Team Engagement to Connect Veterans Experiencing Homelessness With Appropriate Health Care.. <i>Medical care.</i> 2017//. 55 Suppl 9 Suppl 2:S104                                                                                                                                                                                                                                                                                                                                                                                                                                                                                                                                                                                                                                                                                                                                                                                            | Title/abstract screen               |
| 222 | <b>Thomas R Vetter, Zeev N Kain.</b> Role of the Perioperative Surgical Home in Optimizing the Perioperative Use of Opioids.. <i>Anesthesia and analgesia.</i> 2017//. 125:1653                                                                                                                                                                                                                                                                                                                                                                                                                                                                                                                                                                                                                                                                                                                                                                                                                                                                                | Level 1, Form Title/abstract screen |
| 223 | <b>Thomas John.</b> Setting up recovery clinics and promoting service user involvement.. <i>British journal of nursing (Mark Allen Publishing).</i> 2017//. 26:671                                                                                                                                                                                                                                                                                                                                                                                                                                                                                                                                                                                                                                                                                                                                                                                                                                                                                             | Level 1, Form Title/abstract screen |
| 224 | <b>S I Ovcharenko, B A Volel', Ya K Galetskaitė.</b> [A personalized approach to the pulmonary rehabilitation of patients with chronic obstructive pulmonary disease].. <i>Terapevticheskii arkhiv.</i> 2017//. 89:18                                                                                                                                                                                                                                                                                                                                                                                                                                                                                                                                                                                                                                                                                                                                                                                                                                          | Level 1, Form Title/abstract screen |
| 225 | <b>Akhil Shenoy, Jacob M Appel.</b> Safeguarding Confidentiality in Electronic Health Records.. <i>Cambridge quarterly of healthcare ethics : CQ : the international journal of healthcare ethics committees.</i> 2017//. 26:337                                                                                                                                                                                                                                                                                                                                                                                                                                                                                                                                                                                                                                                                                                                                                                                                                               | Level 1, Form Title/abstract screen |
| 226 | <b>Laxmaiah Manchikanti, Adam M Kaye, Nebojsa Nick Knezevic, Heath McAnally, Konstantin Slavin, Andrea M Trescot, Susan Blank, Vidyasagar Pampati, Salahadin Abdi, Jay S Grider, Alan D Kaye, Kavita N Manchikanti, Harold Cordner, Christopher G Gharibo, Michael E Harned, Sheri L Albers, Sairam Atluri, Steve M Aydin, Sanjay Bakshi, Robert L Barkin, Ramsin M Benyamin, Mark V Boswell, Ricardo M Buenaventura, Aaron K Calodney, David L Cedeno, Sukdeb Datta, Timothy R Deer, Bert Fellows, Vincent Galan, Vahid Grami, Hans Hansen, Standiford Helm II, Rafael Justiz, Dhanalakshmi Koyyalagunta, Yogesh Malla, Annu Navani, Kent H Nouri, Ramarao Pasupuleti, Nalini Sehgal, Sanford M Silverman, Thomas T Simopoulos, Vijay Singh, Daneshvari R Solanki, Peter S Staats, Ricardo Vallejo, Bradley W Wargo, Arthur Watanabe, Joshua A Hirsch.</b> Responsible, Safe, and Effective Prescription of Opioids for Chronic Non-Cancer Pain: American Society of Interventional Pain Physicians (ASIPP) Guidelines.. <i>Pain physician.</i> 2017//. 20:S3 | Level 1, Form Title/abstract screen |
| 227 | <b>Joshua L Akers, Ryan N Hansen, Ryan D Oftebro.</b> Implementing take-home naloxone in an urban community pharmacy.. <i>Journal of the American Pharmacists Association : JAPhA.</i> 2017//. 57:S161                                                                                                                                                                                                                                                                                                                                                                                                                                                                                                                                                                                                                                                                                                                                                                                                                                                         | Level 1, Form Title/abstract screen |
| 228 | <b>Mary Beth Sutter, Sarah Gopman, Lawrence Leeman.</b> Patient-centered Care to Address Barriers for Pregnant Women with Opioid Dependence.. <i>Obstetrics and gynecology clinics of North America.</i> 2017//. 44:95                                                                                                                                                                                                                                                                                                                                                                                                                                                                                                                                                                                                                                                                                                                                                                                                                                         | Level 2, Form Full Text Screening   |
| 229 | <b>D R Aberle.</b> Implementing lung cancer screening: the US experience.. <i>Clinical radiology.</i> 2017//. 72:401                                                                                                                                                                                                                                                                                                                                                                                                                                                                                                                                                                                                                                                                                                                                                                                                                                                                                                                                           | Level 1, Form Title/abstract screen |
| 230 | <b>Mette Groenkjaer, Charlotte de Crespigny, Dennis Liu, John Moss, Imelda Cairney, Deb Lee, Nicholas Procter, Cherrie Galletly.</b> "The Chicken or the Egg": Barriers and Facilitators to Collaborative Care for People With Comorbidity in a Metropolitan Region of South Australia.. <i>Issues in mental health nursing.</i> 2017//. 38:18                                                                                                                                                                                                                                                                                                                                                                                                                                                                                                                                                                                                                                                                                                                 | Level 1, Form Title/abstract screen |
| 231 | <b>Kevin Richard, Timothy Baghurst, J Michael Faragher, Erin Stotts.</b> Practical Treatments Considering the Role of Sociocultural Factors on Problem Gambling.. <i>Journal of gambling studies.</i> 2017//. 33:265                                                                                                                                                                                                                                                                                                                                                                                                                                                                                                                                                                                                                                                                                                                                                                                                                                           | Level 1, Form Title/abstract screen |
| 232 | <b>Paulina Sockolow, Seran Schug, Jichen Zhu, T J Smith, Yalini Senathirajah, Sandra Bloom.</b> At-risk adolescents as experts in a new                                                                                                                                                                                                                                                                                                                                                                                                                                                                                                                                                                                                                                                                                                                                                                                                                                                                                                                        | Level 1, Form Title/abstract        |

|     |                                                                                                                                                                                                                                                                                                                                                                                                                                                                                                                                                                                |                                     |
|-----|--------------------------------------------------------------------------------------------------------------------------------------------------------------------------------------------------------------------------------------------------------------------------------------------------------------------------------------------------------------------------------------------------------------------------------------------------------------------------------------------------------------------------------------------------------------------------------|-------------------------------------|
|     | requirements elicitation procedure for the development of a smart phone psychoeducational trauma-informed care application.. <i>Informatics for health &amp; social care</i> . 2017//. 42:77                                                                                                                                                                                                                                                                                                                                                                                   | screen                              |
| 233 | <b>David J Steiner, Thomson Reuters Accelus.</b> Pharmaceuticals and Medical Devices: Medicare Part D.. <i>Issue brief (Health Policy Tracking Service)</i> . 2016//. 2016:1                                                                                                                                                                                                                                                                                                                                                                                                   | Level 1, Form Title/abstract screen |
| 234 | <b>Tanya E Baker, Grace Chang.</b> The use of auricular acupuncture in opioid use disorder: A systematic literature review.. <i>The American journal on addictions</i> . 2016//. 25:592                                                                                                                                                                                                                                                                                                                                                                                        | Level 1, Form Title/abstract screen |
| 235 | <b>Coral Sirdifield, Sara Owen, Charlie Brooker.</b> Engaging offenders on probation in health research: lessons from the field.. <i>Nurse researcher</i> . 2016//. 24:18                                                                                                                                                                                                                                                                                                                                                                                                      | Level 1, Form Title/abstract screen |
| 236 | <b>Elizabeth M Camacho, Dionysios Ntais, Peter Coventry, Peter Bower, Karina Lovell, Carolyn Chew-Graham, Clare Baguley, Linda Gask, Chris Dickens, Linda M Davies.</b> Long-term cost-effectiveness of collaborative care (vs usual care) for people with depression and comorbid diabetes or cardiovascular disease: a Markov model informed by the COINCIDE randomised controlled trial.. <i>BMJ open</i> . 2016//. 6:e012514                                                                                                                                               | Level 1, Form Title/abstract screen |
| 237 | <b>Pascal Wabnitz, Klaus-Thomas Kronmuller, Erwin Wieskus-Friedemann, Sabine Kliem, Johannes Hoppmann, Monika Burek, Michael Lohr, Ulrich Kemper, Andre Nienaber.</b> ["Nicht von schlechten Eltern - NischE": A Family Orientated Collaborative Care Approach to Support Children in Families with Mentally Ill Parents].. <i>Praxis der Kinderpsychologie und Kinderpsychiatrie</i> . 2016//. 65:668                                                                                                                                                                         | Level 1, Form Title/abstract screen |
| 238 | <b>Marie-Josée Fleury, Guy Grenier, Catherine Vallee, Denise Aube, Lambert Farand, Jean-Marie Bamvita, Genevieve Cyr.</b> Implementation of the Quebec mental health reform (2005-2015).. <i>BMC health services research</i> . 2016//. 16:586                                                                                                                                                                                                                                                                                                                                 | Level 1, Form Title/abstract screen |
| 239 | <b>Todd J Anderson, Jean Gregoire, Glen J Pearson, Arden R Barry, Patrick Couture, Martin Dawes, Gordon A Francis, Jacques Jr Genest, Steven Grover, Milan Gupta, Robert A Hegele, David C Lau, Lawrence A Leiter, Eva Lonn, G B John Mancini, Ruth McPherson, Daniel Ngui, Paul Poirier, John L Sievenpiper, James A Stone, George Thanassoulis, Richard Ward.</b> 2016 Canadian Cardiovascular Society Guidelines for the Management of Dyslipidemia for the Prevention of Cardiovascular Disease in the Adult.. <i>The Canadian journal of cardiology</i> . 2016//. 32:1263 | Level 1, Form Title/abstract screen |
| 240 | <b>Rebecca P Barclay, Robert J Hilt.</b> Integrated Care for Pediatric Substance Abuse.. <i>Child and adolescent psychiatric clinics of North America</i> . 2016//. 25:769                                                                                                                                                                                                                                                                                                                                                                                                     | Level 1, Form Title/abstract screen |
| 241 | <b>Jennifer J Bowdoin, Rosa Rodriguez-Monguio, Elaine Puleo, David Keller, Joan Roche.</b> Associations between the patient-centered medical home and preventive care and healthcare quality for non-elderly adults with mental illness: A surveillance study analysis.. <i>BMC health services research</i> . 2016//. 16:434                                                                                                                                                                                                                                                  | Level 1, Form Title/abstract screen |
| 243 | <b>Irene Tami-Maury, Aditya J Wagh, Nathalie E Abou Khalil, Ellen R Gritz, Mark S Chambers.</b> Dental care in Texas: An opportunity for implementing a comprehensive and patient-centric approach with special emphasis on cancer patients and survivors.. <i>Texas dental journal</i> . 2016//. 133:364                                                                                                                                                                                                                                                                      | Level 1, Form Title/abstract screen |
| 244 | <b>Shiraz I Mishra, Andrew L Sussman, Ambroshia M Murrietta, Christina M Getrich, Robert Rhyne, Richard E Crowell, Kathryn L Taylor, Ellen J Reifler, Pamela H Wescott, Ali I Saeed, Richard M Hoffman.</b> Patient                                                                                                                                                                                                                                                                                                                                                            | Level 1, Form Title/abstract screen |

|     |                                                                                                                                                                                                                                                                                                                                                                                                                                                                                                                                                                                                                                                                                                                                                                                        |                                     |
|-----|----------------------------------------------------------------------------------------------------------------------------------------------------------------------------------------------------------------------------------------------------------------------------------------------------------------------------------------------------------------------------------------------------------------------------------------------------------------------------------------------------------------------------------------------------------------------------------------------------------------------------------------------------------------------------------------------------------------------------------------------------------------------------------------|-------------------------------------|
|     | Perspectives on Low-Dose Computed Tomography for Lung Cancer Screening, New Mexico, 2014.. <i>Preventing chronic disease</i> . 2016//. 13:E108                                                                                                                                                                                                                                                                                                                                                                                                                                                                                                                                                                                                                                         |                                     |
| 245 | <b>Haq Nawaz, Paul V Petraro, Christina Via, Saif Ullah, Lionel Lim, Dorothea Wild, Mary Kennedy, Edward M Phillips.</b> Lifestyle medicine curriculum for a preventive medicine residency program: implementation and outcomes.. <i>Medical education online</i> . 2016//. 21:29339                                                                                                                                                                                                                                                                                                                                                                                                                                                                                                   | Level 1, Form Title/abstract screen |
| 246 | <b>Leah C Susser, Stephanie A Sansone, Alison D Hermann.</b> Selective serotonin reuptake inhibitors for depression in pregnancy.. <i>American journal of obstetrics and gynecology</i> . 2016//. 215:722                                                                                                                                                                                                                                                                                                                                                                                                                                                                                                                                                                              | Level 1, Form Title/abstract screen |
| 247 | <b>Lisa R Metsch, Daniel J Feaster, Lauren Gooden, Tim Matheson, Maxine Stitzer, Moupali Das, Mamta K Jain, Allan E Rodriguez, Wendy S Armstrong, Gregory M Lucas, Ank E Nijhawan, Mari-Lynn Drainoni, Patricia Herrera, Pamela Vergara-Rodriguez, Jeffrey M Jacobson, Michael J Mugavero, Meg Sullivan, Eric S Daar, Deborah K McMahon, David C Ferris, Robert Lindblad, Paul VanVeldhuisen, Neal Oden, Pedro C Castellon, Susan Tross, Louise F Haynes, Antoine Douaihy, James L Sorensen, David S Metzger, Raul N Mandler, Grant N Colfax, Carlos del Rio.</b> Effect of Patient Navigation With or Without Financial Incentives on Viral Suppression Among Hospitalized Patients With HIV Infection and Substance Use: A Randomized Clinical Trial.. <i>JAMA</i> . 2016//. 316:156 | Level 1, Form Title/abstract screen |
| 248 | <b>Sebastiano Guarnaccia, Charvonne N Holliday, Emanuele D'Agata, Ada Pluda, Gaia Pecorelli, Valeria Gretter, Susanna Facchetti, Richard A Bilonick, Matthew G Masiello, Edmund Ricci.</b> Clinical and health promotion asthma management: an intervention for children and adolescents.. <i>Allergy and asthma proceedings</i> . 2016//. 37:70                                                                                                                                                                                                                                                                                                                                                                                                                                       | Level 1, Form Title/abstract screen |
| 249 | <b>Denny Z H Levett, Mark Edwards, Mike Grocott, Monty Mythen.</b> Preparing the patient for surgery to improve outcomes.. <i>Best practice &amp; research. Clinical anaesthesiology</i> . 2016//. 30:145                                                                                                                                                                                                                                                                                                                                                                                                                                                                                                                                                                              | Level 1, Form Title/abstract screen |
| 250 | <b>Nancy Elder, Michelle Penm, Harini Pallerla, Mary Beth Vonder Meulen, Amy Diane Short, Tiffany Diers, Ryan Joseph Imhoff, Brendan Wilson, Jill Martin Boone.</b> Provision of Recommended Chronic Pain Assessment and Management in Primary Care: Does Patient-Centered Medical Home (PCMH) Recognition Make a Difference?.. <i>Journal of the American Board of Family Medicine : JABFM</i> . 2016//. 29:474                                                                                                                                                                                                                                                                                                                                                                       | Level 1, Form Title/abstract screen |
| 251 | <b>Kyle L Olesek, Jared Outcalt, Giancarlo Dimaggio, Raffaele Popolo, Sunita George, Paul H Lysaker.</b> Cluster B Personality Disorder Traits as a Predictor of Therapeutic Alliance Over Time in Residential Treatment for Substance Use Disorders.. <i>The Journal of nervous and mental disease</i> . 2016//. 204:736                                                                                                                                                                                                                                                                                                                                                                                                                                                              | Level 1, Form Title/abstract screen |
| 252 | <b>Ashley Archiopoli, Tamar Ginossar, Bryan Wilcox, Magdalena Avila, Ricky Hill, John Oetzel.</b> Factors of interpersonal communication and behavioral health on medication self-efficacy and medication adherence.. <i>AIDS care</i> . 2016//. 28:1607                                                                                                                                                                                                                                                                                                                                                                                                                                                                                                                               | Level 1, Form Title/abstract screen |
| 253 | <b>Sainza Garcia, Monica Martinez-Cengotitabengoa, Saioa Lopez-Zurbano, Inaki Zorrilla, Purificacion Lopez, Eduard Vieta, Ana Gonzalez-Pinto.</b> Adherence to Antipsychotic Medication in Bipolar Disorder and Schizophrenic Patients: A Systematic Review.. <i>Journal of clinical psychopharmacology</i> . 2016//. 36:355                                                                                                                                                                                                                                                                                                                                                                                                                                                           | Level 1, Form Title/abstract screen |
| 254 | <b>Kathleen L Ruchalski, Kathleen Brown.</b> Lung Cancer Screening Update.. <i>Journal of thoracic imaging</i> . 2016//. 31:190                                                                                                                                                                                                                                                                                                                                                                                                                                                                                                                                                                                                                                                        | Level 1, Form Title/abstract screen |

|     |                                                                                                                                                                                                                                                                                                                                                                                                                                            |                                           |
|-----|--------------------------------------------------------------------------------------------------------------------------------------------------------------------------------------------------------------------------------------------------------------------------------------------------------------------------------------------------------------------------------------------------------------------------------------------|-------------------------------------------|
| 255 | <b>Kathy Puskar, Ann M Mitchell, Susan A Albrecht, Linda R Frank, Irene Kane, Holly Hagle, Dawn Lindsay, Heeyoung Lee, Marie Fioravanti, Kimberly S Talcott.</b> Interprofessional collaborative practice incorporating training for alcohol and drug use screening for healthcare providers in rural areas.. <i>Journal of interprofessional care.</i> 2016//. 30:542                                                                     | Level 1, Form<br>Title/abstract<br>screen |
| 256 | <b>Jayne Kotz, Ailsa Munns, Rhonda Marriott, Julia V Marley.</b> Perinatal depression and screening among Aboriginal Australians in the Kimberley.. <i>Contemporary nurse.</i> 2016//. 52:42                                                                                                                                                                                                                                               | Level 1, Form<br>Title/abstract<br>screen |
| 258 | <b>Santina Wheat, Dorothy Dschida, Mary R Talen.</b> Psychiatric Emergencies.. <i>Primary care.</i> 2016//. 43:341                                                                                                                                                                                                                                                                                                                         | Level 1, Form<br>Title/abstract<br>screen |
| 259 | <b>Elizabeth W Cozine, John M Wilkinson.</b> Depression Screening, Diagnosis, and Treatment Across the Lifespan.. <i>Primary care.</i> 2016//. 43:229                                                                                                                                                                                                                                                                                      | Level 1, Form<br>Title/abstract<br>screen |
| 260 | <b>Victoria A Anyikwa.</b> Trauma-Informed Approach to Survivors of Intimate Partner Violence.. <i>Journal of evidence-informed social work.</i> 2016//. 13:484                                                                                                                                                                                                                                                                            | Level 1, Form<br>Title/abstract<br>screen |
| 261 | <b>Kulnaree Hanpatchaiyakul, Henrik Eriksson, Jureerat Kijssomporn, Gunnel Ostlund.</b> Healthcare providers' experiences of working with alcohol addiction treatment in Thailand.. <i>Contemporary nurse.</i> 2016//. 52:59                                                                                                                                                                                                               | Level 1, Form<br>Title/abstract<br>screen |
| 262 | <b>Douglas F Zatzick, Joan Russo, Doyanne Darnell, David A Chambers, Lawrence Palinkas, Erik Van Eaton, Jin Wang, Leah M Ingraham, Roxanne Guiney, Patrick Heagerty, Bryan Comstock, Lauren K Whiteside, Gregory Jurkovich.</b> An effectiveness-implementation hybrid trial study protocol targeting posttraumatic stress disorder and comorbidity.. <i>Implementation science : IS.</i> 2016//. 11:58                                    | Level 1, Form<br>Title/abstract<br>screen |
| 263 | <b>Francoise Labat, Anjali Sharma.</b> Qualitative study exploring surgical team members' perception of patient safety in conflict-ridden Eastern Democratic Republic of Congo.. <i>BMJ open.</i> 2016//. 6:e009379                                                                                                                                                                                                                        | Level 1, Form<br>Title/abstract<br>screen |
| 264 | <b>Lisa Rapp.</b> Delinquent-Victim Youth-Adapting a Trauma-Informed Approach for the Juvenile Justice System.. <i>Journal of evidence-informed social work.</i> 2016//. 13:492                                                                                                                                                                                                                                                            | Level 1, Form<br>Title/abstract<br>screen |
| 266 | <b>Sacha Agrawal, Pat Capponi, Jenna Lopez, Sean Kidd, Charlotte Ringsted, David Wiljer, Sophie Soklaridis.</b> From Surviving to Advising: A Novel Course Pairing Mental Health and Addictions Service Users as Advisors to Senior Psychiatry Residents.. <i>Academic psychiatry : the journal of the American Association of Directors of Psychiatric Residency Training and the Association for Academic Psychiatry.</i> 2016//. 40:475 | Level 1, Form<br>Title/abstract<br>screen |
| 267 | <b>Jenna A LoGiudice, Sherifa Douglas.</b> Incorporation of Sexual Violence in Nursing Curricula Using Trauma-Informed Care: A Case Study.. <i>The Journal of nursing education.</i> 2016//. 55:215                                                                                                                                                                                                                                        | Level 1, Form<br>Title/abstract<br>screen |
| 269 | <b>John F Kelly, M Claire Greene, Brandon G Bergman.</b> Recovery benefits of the "therapeutic alliance" among 12-step mutual-help organization attendees and their sponsors.. <i>Drug and alcohol dependence.</i> 2016//. 162:64                                                                                                                                                                                                          | Level 1, Form<br>Title/abstract<br>screen |
| 270 | <b>Babak Tofighi, Ellie Grossman, Scott Sherman, Edward V Nunes, Joshua D Lee.</b> Mobile Phone Messaging During Unobserved "Home" Induction to Buprenorphine.. <i>Journal of addiction medicine.</i> 2016//. 10:309                                                                                                                                                                                                                       | Level 1, Form<br>Title/abstract<br>screen |
| 271 | <b>Anja Gysin-Maillart, Simon Schwab, Leila Soravia, Millie Megert, Konrad Michel.</b> A Novel Brief Therapy for Patients Who Attempt Suicide: A 24-                                                                                                                                                                                                                                                                                       | Level 1, Form<br>Title/abstract           |

|     |                                                                                                                                                                                                                                                                                                                                                                                                                                                                                                                                                           |                                           |
|-----|-----------------------------------------------------------------------------------------------------------------------------------------------------------------------------------------------------------------------------------------------------------------------------------------------------------------------------------------------------------------------------------------------------------------------------------------------------------------------------------------------------------------------------------------------------------|-------------------------------------------|
|     | months Follow-Up Randomized Controlled Study of the Attempted Suicide Short Intervention Program (ASSIP).. <i>PLoS medicine</i> . 2016//. 13:e1001968                                                                                                                                                                                                                                                                                                                                                                                                     | screen                                    |
| 272 | <b>David A Richards, Peter Bower, Carolyn Chew-Graham, Linda Gask, Karina Lovell, John Cape, Stephen Pilling, Ricardo Araya, David Kessler, Michael Barkham, J Martin Bland, Simon Gilbody, Colin Green, Glyn Lewis, Chris Manning, Evangelos Kontopantelis, Jacqueline J Hill, Adwoa Hughes-Morley, Abigail Russell.</b> Clinical effectiveness and cost-effectiveness of collaborative care for depression in UK primary care (CADET): a cluster randomised controlled trial.. <i>Health technology assessment (Winchester, England)</i> . 2016//. 20:1 | Level 1, Form<br>Title/abstract<br>screen |
| 273 | <b>Sven Wahlin, Sara Wallhed Finn, Sven Andreasson.</b> [Stop stigmatizing alcohol problems].. <i>Lakartidningen</i> . 2016//. 113:#pages#                                                                                                                                                                                                                                                                                                                                                                                                                | Level 1, Form<br>Title/abstract<br>screen |
| 275 | <b>Claudia Lin Xiao, Emorfia Gavriliadis, Stuart Lee, Jayashri Kulkarni.</b> Do mental health clinicians elicit a history of previous trauma in female psychiatric inpatients?.. <i>Journal of mental health (Abingdon, England)</i> . 2016//. 25:359                                                                                                                                                                                                                                                                                                     | Level 1, Form<br>Title/abstract<br>screen |
| 276 | <b>Kelly A Aschbrenner, John A Naslund, Lydia E Gill, Stephen J Bartels, Dror Ben-Zeev.</b> A Qualitative Study of Client-Clinician Text Exchanges in a Mobile Health Intervention for Individuals With Psychotic Disorders and Substance Use.. <i>Journal of dual diagnosis</i> . 2016//. 12:63                                                                                                                                                                                                                                                          | Level 1, Form<br>Title/abstract<br>screen |
| 277 | <b>Valerie Noel, Mary Woods, Jonathan Routhier, Robert Drake.</b> Planning Treatment and Assessing Recovery in Participants With Dual Diagnosis: Preliminary Evaluation of a New Clinical Tool.. <i>Journal of dual diagnosis</i> . 2016//. 12:55                                                                                                                                                                                                                                                                                                         | Level 1, Form<br>Title/abstract<br>screen |
| 278 | <b>Barbara St Marie.</b> Primary care experiences of people who live with chronic pain and receive opioids to manage pain: A qualitative methodology.. <i>Journal of the American Association of Nurse Practitioners</i> . 2016//. 28:429                                                                                                                                                                                                                                                                                                                 | Level 1, Form<br>Title/abstract<br>screen |
| 279 | <b>Jean Yoon, Adam Chow, Lisa V Rubenstein.</b> Impact of Medical Home Implementation Through Evidence-based Quality Improvement on Utilization and Costs.. <i>Medical care</i> . 2016//. 54:118                                                                                                                                                                                                                                                                                                                                                          | Level 1, Form<br>Title/abstract<br>screen |
| 280 | <b>Rebekah Sypniewski.</b> Motivational Interviewing: A Practical Intervention for School Nurses to Engage in Trauma Informed Care.. <i>NASN school nurse (Print)</i> . 2016//. 31:40                                                                                                                                                                                                                                                                                                                                                                     | Level 1, Form<br>Title/abstract<br>screen |
| 282 | <b>Katherine E Lubarsky, Jonathan D Avery.</b> Dignity Therapy for Alcohol Use Disorder.. <i>The American journal of psychiatry</i> . 2016//. 173:90                                                                                                                                                                                                                                                                                                                                                                                                      | Level 2, Form<br>Full Text<br>Screening   |
| 283 | <b>Babak Tofighi, Ellie Grossman, Sewit Bereket, Joshua D Lee.</b> Text message content preferences to improve buprenorphine maintenance treatment in primary care.. <i>Journal of addictive diseases</i> . 2016//. 35:92                                                                                                                                                                                                                                                                                                                                 | Level 1, Form<br>Title/abstract<br>screen |
| 284 | <b>David Mechanic, Mark Olfson.</b> The Relevance of the Affordable Care Act for Improving Mental Health Care.. <i>Annual review of clinical psychology</i> . 2016//. 12:515                                                                                                                                                                                                                                                                                                                                                                              | Level 1, Form<br>Title/abstract<br>screen |
| 285 | <b>JoAn R Laes.</b> The Integration of Medical Toxicology and Addiction Medicine: a New Era in Patient Care.. <i>Journal of medical toxicology : official journal of the American College of Medical Toxicology</i> . 2016//. 12:79                                                                                                                                                                                                                                                                                                                       | Level 1, Form<br>Title/abstract<br>screen |
| 286 | <b>Marjolein Snaterse, Jos Dobber, Patricia Jepma, Ron J G Peters, Gerben Ter Riet, S Matthijs Boekholdt, Bianca M Buurman, Wilma J M Scholte op Reimer.</b> Effective components of nurse-coordinated care to prevent recurrent coronary events: a systematic review and meta-analysis.. <i>Heart (British Cardiac</i>                                                                                                                                                                                                                                   | Level 1, Form<br>Title/abstract<br>screen |

|     |                                                                                                                                                                                                                                                                                                                                                                                                                                            |                                     |
|-----|--------------------------------------------------------------------------------------------------------------------------------------------------------------------------------------------------------------------------------------------------------------------------------------------------------------------------------------------------------------------------------------------------------------------------------------------|-------------------------------------|
|     | <i>Society</i> ). 2016//. 102:50                                                                                                                                                                                                                                                                                                                                                                                                           |                                     |
| 288 | <b>Ryan McNeil, Thomas Kerr, Bernie Pauly, Evan Wood, Will Small.</b> Advancing patient-centered care for structurally vulnerable drug-using populations: a qualitative study of the perspectives of people who use drugs regarding the potential integration of harm reduction interventions into hospitals.. <i>Addiction (Abingdon, England)</i> . 2016//. 111:685                                                                      | Level 2, Form Full Text Screening   |
| 289 | <b>Jamie Chang, Leslie Dubbin, Janet Shim.</b> Negotiating substance use stigma: the role of cultural health capital in provider-patient interactions.. <i>Sociology of health &amp; illness</i> . 2016//. 38:90                                                                                                                                                                                                                           | Level 2, Form Full Text Screening   |
| 290 | <b>Susan E Collins, Connor B Jones, Gail Hoffmann, Lonnie A Nelson, Starlyn M Hawes, Veronique S Grazioli, Jessica L Mackelprang, Jessica Holttum, Greta Kaese, James Lenert, Patrick Herndon, Seema L Clifasefi.</b> In their own words: Content analysis of pathways to recovery among individuals with the lived experience of homelessness and alcohol use disorders.. <i>The International journal on drug policy</i> . 2016//. 27:89 | Level 1, Form Title/abstract screen |
| 291 | <b>Colleen T LaBelle, Steve Choongheon Han, Alexis Bergeron, Jeffrey H Samet.</b> Office-Based Opioid Treatment with Buprenorphine (OBOT-B): Statewide Implementation of the Massachusetts Collaborative Care Model in Community Health Centers.. <i>Journal of substance abuse treatment</i> . 2016//. 60:6                                                                                                                               | Level 1, Form Title/abstract screen |
| 292 | <b>Allysha C Robinson, Amy R Knowlton.</b> Gender Differences in Psychosocial Factors Associated with HIV Viral Suppression Among African-American Injection Drug Users.. <i>AIDS and behavior</i> . 2016//. 20:385                                                                                                                                                                                                                        | Level 1, Form Title/abstract screen |
| 293 | <b>John F Kelly, M Claire Greene, Brandon Bergman, Bettina B Hoepfner, Valerie Slaymaker.</b> The Sponsor Alliance Inventory: Assessing the Therapeutic Bond Between 12-Step Attendees and Their Sponsors.. <i>Alcohol and alcoholism (Oxford, Oxfordshire)</i> . 2016//. 51:32                                                                                                                                                            | Level 1, Form Title/abstract screen |
| 294 | <b>Gerald Cochran, Adam J Gordon, Craig Field, Jennifer Bacci, Ranjita Dhital, Thomas Ylioja, Maxine Stitzer, Thomas Kelly, Ralph Tarter.</b> Developing a framework of care for opioid medication misuse in community pharmacy.. <i>Research in social &amp; administrative pharmacy : RSAP</i> . 2016//. 12:293                                                                                                                          | Level 1, Form Title/abstract screen |
| 295 | <b>Melissa L Anderson, Neil S Glickman, Lisa A Mistler, Marco Gonzalez.</b> Working therapeutically with deaf people recovering from trauma and addiction.. <i>Psychiatric rehabilitation journal</i> . 2016//. 39:27                                                                                                                                                                                                                      | Level 1, Form Title/abstract screen |
| 296 | <b>Marc L Steinberg, Jill M Williams, Naomi F Stahl, Patricia Dooley Budsock, Nina A Cooperman.</b> An Adaptation of Motivational Interviewing Increases Quit Attempts in Smokers With Serious Mental Illness.. <i>Nicotine &amp; tobacco research : official journal of the Society for Research on Nicotine and Tobacco</i> . 2016//. 18:243                                                                                             | Level 1, Form Title/abstract screen |
| 297 | <b>Jill Sederstrom.</b> IT PAYS TO BE PATIENT-CENTERED AND TRAUMA-INFORMED.. <i>Behavioral healthcare</i> . 2015//. 35:28                                                                                                                                                                                                                                                                                                                  | Level 2, Form Full Text Screening   |
| 298 | <b>Sally Bradford, Debra Rickwood.</b> Acceptability and utility of an electronic psychosocial assessment (myAssessment) to increase self-disclosure in youth mental healthcare: a quasi-experimental study.. <i>BMC psychiatry</i> . 2015//. 15:305                                                                                                                                                                                       | Level 1, Form Title/abstract screen |
| 299 | <b>Annie Lewis-O'Connor, Mardi Chadwick.</b> Engaging the Voice of Patients Affected by Gender-Based Violence: Informing Practice and Policy.. <i>Journal of forensic nursing</i> . 2015//. 11:240                                                                                                                                                                                                                                         | Level 1, Form Title/abstract screen |
| 300 | <b>Geraldine S Whittaker.</b> An educational approach for "non-compliant"                                                                                                                                                                                                                                                                                                                                                                  | Level 1, Form                       |

|     |                                                                                                                                                                                                                                                                                                                                                                                        |                                     |
|-----|----------------------------------------------------------------------------------------------------------------------------------------------------------------------------------------------------------------------------------------------------------------------------------------------------------------------------------------------------------------------------------------|-------------------------------------|
|     | patients.. <i>The Canadian journal of critical care nursing</i> . 2015//. 26:11                                                                                                                                                                                                                                                                                                        | Title/abstract screen               |
| 301 | <b>Salim S Virani, Thomas M Maddox, Paul S Chan, Fengming Tang, Julia M Akeroyd, Samantha A Risch, William J Oetgen, Anita Deswal, Biykem Bozkurt, Christie M Ballantyne, Laura A Petersen.</b> Provider Type and Quality of Outpatient Cardiovascular Disease Care: Insights From the NCDR PINNACLE Registry.. <i>Journal of the American College of Cardiology</i> . 2015//. 66:1803 | Level 1, Form Title/abstract screen |
| 302 | <b>Pia Rydell, Pontus Stralin.</b> [Investigation and follow-up requires collaboration].. <i>Lakartidningen</i> . 2015//. 112:#pages#                                                                                                                                                                                                                                                  | Level 1, Form Title/abstract screen |
| 303 | <b>Li-Tzy Wu, Udi E Ghitza, Bryan C Batch, Michael J Pencina, Leoncio Flavio Rojas, Benjamin A Goldstein, Tony Schibler, Ashley A Dunham, Shelley Rusincovitch, Kathleen T Brady.</b> Substance use and mental diagnoses among adults with and without type 2 diabetes: Results from electronic health records data.. <i>Drug and alcohol dependence</i> . 2015//. 156:162             | Level 1, Form Title/abstract screen |
| 304 | <b>Lisa M Quintiliani, Zlatka L Russinova, Philippe P Bloch, Ve Truong, Ziming Xuan, Lori Pbert, Karen E Lasser.</b> Patient navigation and financial incentives to promote smoking cessation in an underserved primary care population: A randomized controlled trial protocol.. <i>Contemporary clinical trials</i> . 2015//. 45:449                                                 | Level 1, Form Title/abstract screen |
| 305 | <b>David Roll, Margaret Spottswood, Hsiang Huang.</b> Using Shared Medical Appointments to Increase Access to Buprenorphine Treatment.. <i>Journal of the American Board of Family Medicine : JABFM</i> . 2015//. 28:676                                                                                                                                                               | Level 1, Form Title/abstract screen |
| 306 | <b>Antoinette Krupski, Imara I West, Meredith C Graves, David C Atkins, Charles Maynard, Kristin Bumgardner, Dennis Donovan, Richard Ries, Peter Roy-Byrne.</b> Clinical Needs of Patients with Problem Drug Use.. <i>Journal of the American Board of Family Medicine : JABFM</i> . 2015//. 28:605                                                                                    | Level 1, Form Title/abstract screen |
| 307 | <b>P Staccini, L Fernandez-Luque.</b> Health Social Media and Patient-Centered Care: Buzz or Evidence? Findings from the Section "Education and Consumer Health Informatics" of the 2015 Edition of the IMIA Yearbook.. <i>Yearbook of medical informatics</i> . 2015//. 10:160                                                                                                        | Level 1, Form Title/abstract screen |
| 308 | <b>Carla Kaufmann, Stefan Markun, Susann Hasler, Kaba Dalla Lana, Thomas Rosemann, Oliver Senn, Claudia Steurer-Stey.</b> Performance Measures in the Management of Chronic Obstructive Pulmonary Disease in Primary Care--A Retrospective Analysis.. <i>Praxis</i> . 2015//. 104:897                                                                                                  | Level 1, Form Title/abstract screen |
| 309 | <b>Anne Kveim Lie, Terje Jensen, Hanne Lichtwarck, Jon Storaas, Erik Torjussen, Ingrid Amalia Havnes.</b> [Putting the patient at the center--already as a student].. <i>Tidsskrift for den Norske laegeforening : tidsskrift for praktisk medicin, ny raeke</i> . 2015//. 135:1236                                                                                                    | Level 2, Form Full Text Screening   |
| 310 | <b>Rita Kukafka, In cheol Jeong, Joseph Finkelstein.</b> Optimizing Decision Support for Tailored Health Behavior Change Applications.. <i>Studies in health technology and informatics</i> . 2015//. 216:108                                                                                                                                                                          | Level 1, Form Title/abstract screen |
| 311 | <b>Michael S Martin, Gordana Eljdupovic, Kwame McKenzie, Ian Colman.</b> Risk of violence by inmates with childhood trauma and mental health needs.. <i>Law and human behavior</i> . 2015//. 39:614                                                                                                                                                                                    | Level 1, Form Title/abstract screen |
| 312 | <b>Bravein Amalakuhan, Sandra G Adams.</b> Improving outcomes in chronic obstructive pulmonary disease: the role of the interprofessional approach.. <i>International journal of chronic obstructive pulmonary disease</i> . 2015//. 10:1225                                                                                                                                           | Level 1, Form Title/abstract screen |

|     |                                                                                                                                                                                                                                                                                                                                                                                                         |                                           |
|-----|---------------------------------------------------------------------------------------------------------------------------------------------------------------------------------------------------------------------------------------------------------------------------------------------------------------------------------------------------------------------------------------------------------|-------------------------------------------|
| 313 | <b>Michael P Schaub, Larissa J Maier, Andreas Wenger, Lars Stark, Oliver Berg, Thilo Beck, Boris B Quednow, Severin Haug.</b> Evaluating the efficacy of a web-based self-help intervention with and without chat counseling in reducing the cocaine use of problematic cocaine users: the study protocol of a pragmatic three-arm randomized controlled trial.. <i>BMC psychiatry</i> . 2015//. 15:156 | Level 1, Form<br>Title/abstract<br>screen |
| 314 | <b>Colleen Anne Dell, Nancy Poole.</b> Taking a PAWS to Reflect on How the Work of a Therapy Dog Supports a Trauma-Informed Approach to Prisoner Health.. <i>Journal of forensic nursing</i> . 2015//. 11:167                                                                                                                                                                                           | Level 1, Form<br>Title/abstract<br>screen |
| 315 | <b>Jennifer L Saylor, Kathleen A Schell, Mark F Mendell, Jennifer S Graber.</b> Development of a Clinical Competency Checklist for Care of Patients Experiencing Substance Withdrawal Delirium or Delirium: Use of a Delphi Technique and Expert Panel.. <i>Journal of psychosocial nursing and mental health services</i> . 2015//. 53:29                                                              | Level 2, Form<br>Full Text<br>Screening   |
| 316 | <b>Sasa Brankovic.</b> Boredom, dopamine, and the thrill of psychosis: psychiatry in a new key.. <i>Psychiatria Danubina</i> . 2015//. 27:126                                                                                                                                                                                                                                                           | Level 1, Form<br>Title/abstract<br>screen |
| 317 | <b>Terry Shih, Gaetano Paone, Patricia F Theurer, Donna McDonald, David M Shahian, Richard L Prager.</b> The Society of Thoracic Surgeons Adult Cardiac Surgery Database Version 2.73: More Is Better.. <i>The Annals of thoracic surgery</i> . 2015//. 100:516                                                                                                                                         | Level 1, Form<br>Title/abstract<br>screen |
| 318 | <b>Michael J Barry.</b> A Shared Decision-making Intervention: Success or Failure?.. <i>Anesthesiology</i> . 2015//. 123:5                                                                                                                                                                                                                                                                              | Level 1, Form<br>Title/abstract<br>screen |
| 319 | <b>Kristen P Morie, Charla Nich, Karen Hunkele, Marc N Potenza, Kathleen M Carroll.</b> Alexithymia level and response to computer-based training in cognitive behavioral therapy among cocaine-dependent methadone maintained individuals.. <i>Drug and alcohol dependence</i> . 2015//. 152:157                                                                                                       | Level 1, Form<br>Title/abstract<br>screen |
| 320 | <b>Iris Torchalla, Isabelle Aube Linden, Verena Strehlau, Erika K Neilson, Michael Krausz.</b> "Like a lots happened with my whole childhood": violence, trauma, and addiction in pregnant and postpartum women from Vancouver's Downtown Eastside.. <i>Harm reduction journal</i> . 2015//. 12:1                                                                                                       | Level 1, Form<br>Title/abstract<br>screen |
| 321 | <b>Roxana-Maria Nemes, Paraschiva Postolache, Adeline Tintila, F D Mihaltan, F D Petrariu.</b> Aspects of physician-patient communication in the program of smoking cessation.. <i>Revista medico-chirurgicala a Societatii de Medici si Naturalisti din Iasi</i> . 2015//. 119:23                                                                                                                      | Level 2, Form<br>Full Text<br>Screening   |
| 322 | <b>Katherine Berry, Lynsey Gregg, Rosalyn Hartwell, Gillian Haddock, Mike Fitzsimmons, Christine Barrowclough.</b> Therapist-client relationships in a psychological therapy trial for psychosis and substance misuse.. <i>Drug and alcohol dependence</i> . 2015//. 152:170                                                                                                                            | Level 1, Form<br>Title/abstract<br>screen |
| 323 | <b>Allison J Ober, Katherine E Watkins, Sarah B Hunter, Karen Lamp, Mimi Lind, Claude M Setodji.</b> An organizational readiness intervention and randomized controlled trial to test strategies for implementing substance use disorder treatment into primary care: SUMMIT study protocol.. <i>Implementation science : IS</i> . 2015//. 10:66                                                        | Level 2, Form<br>Full Text<br>Screening   |
| 324 | <b>Katherine L Mills.</b> The importance of providing trauma-informed care in alcohol and other drug services.. <i>Drug and alcohol review</i> . 2015//. 34:231                                                                                                                                                                                                                                         | Level 1, Form<br>Title/abstract<br>screen |
| 325 | <b>Mark van Veen, Bauke Koekkoek, Niels Mulder, Debby Postulart, Eddy Adang, Steven Teerenstra, Lisette Schoonhoven, Theo van Achterberg.</b>                                                                                                                                                                                                                                                           | Level 1, Form<br>Title/abstract           |



|     |                                                                                                                                                                                                                                                                                                                                                                                                                          |                                     |
|-----|--------------------------------------------------------------------------------------------------------------------------------------------------------------------------------------------------------------------------------------------------------------------------------------------------------------------------------------------------------------------------------------------------------------------------|-------------------------------------|
|     | Cost effectiveness of interpersonal community psychiatric treatment for people with long-term severe non-psychotic mental disorders: protocol of a multi-centre randomized controlled trial.. <i>BMC psychiatry</i> . 2015//. 15:100                                                                                                                                                                                     | screen                              |
| 326 | <b>Bernadette Bernie Pauly, Jane McCall, Annette J Browne, J Parker, Ashley Mollison.</b> Toward cultural safety: nurse and patient perceptions of illicit substance use in a hospitalized setting.. <i>ANS. Advances in nursing science</i> . 2015//. 38:121                                                                                                                                                            | Level 2, Form Full Text Screening   |
| 327 | <b>Andrew J Epstein, Colleen L Barry, David A Fiellin, Susan H Busch.</b> Consumers' Valuation of Primary Care-Based Treatment Options for Mental and Substance Use Disorders.. <i>Psychiatric services (Washington, D.C.)</i> . 2015//. 66:772                                                                                                                                                                          | Level 1, Form Title/abstract screen |
| 330 | <b>Robert J Smith, Karin Rhodes, Breah Paciotti, Sheila Kelly, Jeanmarie Perrone, Zachary F Meisel.</b> Patient Perspectives of Acute Pain Management in the Era of the Opioid Epidemic.. <i>Annals of emergency medicine</i> . 2015//. 66:246                                                                                                                                                                           | Level 1, Form Title/abstract screen |
| 331 | <b>Bethany A DiPaula, Elizabeth Menachery.</b> Physician-pharmacist collaborative care model for buprenorphine-maintained opioid-dependent patients.. <i>Journal of the American Pharmacists Association : JAPhA</i> . 2015//. 55:187                                                                                                                                                                                    | Level 1, Form Title/abstract screen |
| 332 | <b>Teresa Lopez-Castro, Mei-Chen Hu, Santiago Papini, Lesia M Ruglass, Denise A Hien.</b> Pathways to change: Use trajectories following trauma-informed treatment of women with co-occurring post-traumatic stress disorder and substance use disorders.. <i>Drug and alcohol review</i> . 2015//. 34:242                                                                                                               | Level 2, Form Full Text Screening   |
| 334 | <b>Susan E Collins, Veronique S Grazioli, Nicole I Torres, Emily M Taylor, Connor B Jones, Gail E Hoffman, Laura Haelsig, Mengdan D Zhu, Alyssa S Hatsukami, Molly J Koker, Patrick Herndon, Shawna M Greenleaf, Parker E Dean.</b> Qualitatively and quantitatively evaluating harm-reduction goal setting among chronically homeless individuals with alcohol dependence.. <i>Addictive behaviors</i> . 2015//. 45:184 | Level 1, Form Title/abstract screen |
| 335 | <b>Robert J Smith, Austin S Kilaru, Jeanmarie Perrone, Breah Paciotti, Frances K Barg, Sarah M Gadsden, Zachary F Meisel.</b> How, why, and for whom do emergency medicine providers use prescription drug monitoring programs?.. <i>Pain medicine (Malden, Mass.)</i> . 2015//. 16:1122                                                                                                                                 | Level 1, Form Title/abstract screen |
| 336 | <b>Kimber P Richter, Edward F Ellerbeck.</b> Response to commentaries: changing the treatment default will improve decision-making.. <i>Addiction (Abingdon, England)</i> . 2015//. 110:390                                                                                                                                                                                                                              | Level 1, Form Title/abstract screen |
| 337 | <b>Jennifer Morton, Marjorie Withers, Shelley Cohen Konrad, Carry Buterbaugh, RuthAnne Spence.</b> Bridging the gaps: An early integrated support collaborative for at risk mothers in rural Maine.. <i>Work (Reading, Mass.)</i> . 2015//. 50:413                                                                                                                                                                       | Level 1, Form Title/abstract screen |
| 338 | <b>Mark D Schwartz, Ashley Jensen, Binhuan Wang, Katelyn Bennett, Anne Dembitzer, Shiela Strauss, Antoinette Schoenthaler, Colleen Gillespie, Scott Sherman.</b> Panel Management to Improve Smoking and Hypertension Outcomes by VA Primary Care Teams: A Cluster-Randomized Controlled Trial.. <i>Journal of general internal medicine</i> . 2015//. 30:916                                                            | Level 1, Form Title/abstract screen |
| 339 | <b>Brady J McKee, Andrea B McKee, Andrea Borondy Kitts, Shawn M Regis, Christoph Wald.</b> Low-dose computed tomography screening for lung cancer in a clinical setting: essential elements of a screening program.. <i>Journal of thoracic imaging</i> . 2015//. 30:115                                                                                                                                                 | Level 1, Form Title/abstract screen |
| 340 | <b>Alyson H Sheehan, Myrna L Friedlander.</b> Therapeutic Alliance and Retention in Brief Strategic Family Therapy: A Mixed-Methods Study.. <i>Journal</i>                                                                                                                                                                                                                                                               | Level 1, Form Title/abstract        |

|     |                                                                                                                                                                                                                                                                                                                                                                                                                                                                                                                                                                                                                                     |                                     |
|-----|-------------------------------------------------------------------------------------------------------------------------------------------------------------------------------------------------------------------------------------------------------------------------------------------------------------------------------------------------------------------------------------------------------------------------------------------------------------------------------------------------------------------------------------------------------------------------------------------------------------------------------------|-------------------------------------|
|     | <i>of marital and family therapy</i> . 2015//. 41:415                                                                                                                                                                                                                                                                                                                                                                                                                                                                                                                                                                               | screen                              |
| 341 | <b>Elizabeth K McClain, Erin Jewell Burks</b> . Managing attention-deficit/hyperactivity disorder in children and adolescents.. <i>Primary care</i> . 2015//. 42:99                                                                                                                                                                                                                                                                                                                                                                                                                                                                 | Level 1, Form Title/abstract screen |
| 342 | <b>Pamela J Biernacki, Mary T Champagne, Shane Peng, David R Maizel, Barbara S Turner</b> . Transformation of Care: Integrating the Registered Nurse Care Coordinator into the Patient-Centered Medical Home.. <i>Population health management</i> . 2015//. 18:330                                                                                                                                                                                                                                                                                                                                                                 | Level 1, Form Title/abstract screen |
| 343 | <b>Paula C G Alves, Celia M D Sales, Mark Ashworth</b> . Personalising the evaluation of substance misuse treatment: a new approach to outcome measurement.. <i>The International journal on drug policy</i> . 2015//. 26:333                                                                                                                                                                                                                                                                                                                                                                                                       | Level 1, Form Title/abstract screen |
| 344 | <b>M Lascaux, O Phan</b> . [Comparison of European therapies for cannabis addiction among adolescents].. <i>L'Encephale</i> . 2015//. 41 Suppl 1:S21                                                                                                                                                                                                                                                                                                                                                                                                                                                                                | Level 2, Form Full Text Screening   |
| 346 | <b>John C Fortney, Jeffrey M Pyne, Timothy A Kimbrell, Teresa J Hudson, Dean E Robinson, Ronald Schneider, William M Moore, Paul J Custer, Kathleen M Grubbs, Paula P Schnurr</b> . Telemedicine-based collaborative care for posttraumatic stress disorder: a randomized clinical trial.. <i>JAMA psychiatry</i> . 2015//. 72:58                                                                                                                                                                                                                                                                                                   | Level 1, Form Title/abstract screen |
| 347 | <b>Johanne Eliacin, Michelle P Salyers, Marina Kukla, Marianne S Matthias</b> . Factors influencing patients' preferences and perceived involvement in shared decision-making in mental health care.. <i>Journal of mental health (Abingdon, England)</i> . 2015//. 24:24                                                                                                                                                                                                                                                                                                                                                           | Level 1, Form Title/abstract screen |
| 348 | <b>Amy E Whittle, Sara M Buckelew, Jason M Satterfield, Paula J Lum, Patricia O'Sullivan</b> . Addressing Adolescent Substance Use: Teaching Screening, Brief Intervention, and Referral to Treatment (SBIRT) and Motivational Interviewing (MI) to Residents.. <i>Substance abuse</i> . 2015//. 36:325                                                                                                                                                                                                                                                                                                                             | Level 1, Form Title/abstract screen |
| 349 | <b>Eriphylli Argyra, Ioanna Siafaka, Astero Moutzouri, Vassilios Papadopoulos, Martina Rekatsina, Athina Vadalouca, Kassiani Theodoraki</b> . How does an undergraduate pain course influence future physicians' awareness of chronic pain concepts? A comparative study.. <i>Pain medicine (Malden, Mass.)</i> . 2015//. 16:301                                                                                                                                                                                                                                                                                                    | Level 1, Form Title/abstract screen |
| 350 | <b>Matthew S Kendra, Kenneth R Weingardt, Michael A Cucciare, Christine Timko</b> . Satisfaction with substance use treatment and 12-step groups predicts outcomes.. <i>Addictive behaviors</i> . 2015//. 40:27                                                                                                                                                                                                                                                                                                                                                                                                                     | Level 1, Form Title/abstract screen |
| 351 | <b>Barbara K Campbell, Joseph Gyuish, Thao Le, Elizabeth A Wells, Dennis McCarty</b> . The relationship of therapeutic alliance and treatment delivery fidelity with treatment retention in a multisite trial of twelve-step facilitation.. <i>Psychology of addictive behaviors : journal of the Society of Psychologists in Addictive Behaviors</i> . 2015//. 29:106                                                                                                                                                                                                                                                              | Level 1, Form Title/abstract screen |
| 352 | <b>Louisa G Sylvia, Richard C Shelton, David E Kemp, Emily E Bernstein, Edward S Friedman, Benjamin D Brody, Susan L McElroy, Vivek Singh, Mauricio Tohen, Charles L Bowden, Terence A Ketter, Thilo Deckersbach, Michael E Thase, Noreen A Reilly-Harrington, Andrew A Nierenberg, Dustin J Rabideau, Gustavo Kinrys, James H Kocsis, William V Bobo, Masoud Kamali, Melvin G McInnis, Joseph R Calabrese</b> . Medical burden in bipolar disorder: findings from the Clinical and Health Outcomes Initiative in Comparative Effectiveness for Bipolar Disorder study (Bipolar CHOICE).. <i>Bipolar disorders</i> . 2015//. 17:212 | Level 1, Form Title/abstract screen |
| 353 | <b>William R Miller, Theresa B Moyers</b> . The forest and the trees: relational and                                                                                                                                                                                                                                                                                                                                                                                                                                                                                                                                                | Level 2, Form                       |

|     |                                                                                                                                                                                                                                                                                                                                                                                                                                                                                                                                            |                                           |
|-----|--------------------------------------------------------------------------------------------------------------------------------------------------------------------------------------------------------------------------------------------------------------------------------------------------------------------------------------------------------------------------------------------------------------------------------------------------------------------------------------------------------------------------------------------|-------------------------------------------|
|     | specific factors in addiction treatment.. <i>Addiction (Abingdon, England)</i> . 2015//. 110:401                                                                                                                                                                                                                                                                                                                                                                                                                                           | Full Text<br>Screening                    |
| 354 | <b>Ingrid A Binswanger, Elizabeth Whitley, Paul-Ryan Haffey, Shane R Mueller, Sung-Joon Min.</b> A patient navigation intervention for drug-involved former prison inmates.. <i>Substance abuse</i> . 2015//. 36:34                                                                                                                                                                                                                                                                                                                        | Level 1, Form<br>Title/abstract<br>screen |
| 356 | <b>Volker Tschuschke, Aureliano Cramer, Miriam Koehler, Jessica Berglar, Katharina Muth, Pia Staczan, Agnes Von Wyl, Peter Schulthess, Margit Koemeda-Lutz.</b> The role of therapists' treatment adherence, professional experience, therapeutic alliance, and clients' severity of psychological problems: Prediction of treatment outcome in eight different psychotherapy approaches. Preliminary results of a naturalistic study.. <i>Psychotherapy research : journal of the Society for Psychotherapy Research</i> . 2015//. 25:420 | Level 1, Form<br>Title/abstract<br>screen |
| 357 | <b>Michael J Penkunas, Stephen Hahn-Smith.</b> An Evaluation of IMPACT for the Treatment of Late-Life Depression in a Public Mental Health System.. <i>The journal of behavioral health services &amp; research</i> . 2015//. 42:334                                                                                                                                                                                                                                                                                                       | Level 1, Form<br>Title/abstract<br>screen |
| 358 | <b>Celine Dosissard, Jerome Lipari.</b> [Emergency departments and deliberate medicinal self-poisoning].. <i>Revue de l'infirmiere</i> . 2014//. #volume#:18                                                                                                                                                                                                                                                                                                                                                                               | Level 1, Form<br>Title/abstract<br>screen |
| 359 | <b>Mara Buchbinder, Rachel Wilbur, Diana Zuskov, Samuel McLean, Betsy Sleath.</b> Teachable moments and missed opportunities for smoking cessation counseling in a hospital emergency department: a mixed-methods study of patient-provider communication.. <i>BMC health services research</i> . 2014//. 14:651                                                                                                                                                                                                                           | Level 1, Form<br>Title/abstract<br>screen |
| 360 | <b>Julie Viveros, Joan Kub.</b> Interview with Julie Viveros, RN, Director of Nursing, Charlotte Rescue Mission, Rebound men's program. Interview by Joan Kub.. <i>Journal of addictions nursing</i> . 2014//. 25:211                                                                                                                                                                                                                                                                                                                      | Level 2, Form<br>Full Text<br>Screening   |
| 361 | <b>C F Rueda-Clausen, E Benterud, T Bond, R Olszowka, M T Vallis, A M Sharma.</b> Effect of implementing the 5As of obesity management framework on provider-patient interactions in primary care.. <i>Clinical obesity</i> . 2014//. 4:39                                                                                                                                                                                                                                                                                                 | Level 1, Form<br>Title/abstract<br>screen |
| 362 | <b>Arlene Lovejoy-Bluem.</b> Drug-exposed newborns and caregivers:quality care collaborative for the mother-baby-community triad.. <i>Neonatal network : NN</i> . 2014//. 33:356                                                                                                                                                                                                                                                                                                                                                           | Level 1, Form<br>Title/abstract<br>screen |
| 364 | <b>Dror Ben-Zeev, Susan M Kaiser, Izabela Krzos.</b> Remote "hovering" with individuals with psychotic disorders and substance use: feasibility, engagement, and therapeutic alliance with a text-messaging mobile interventionist.. <i>Journal of dual diagnosis</i> . 2014//. 10:197                                                                                                                                                                                                                                                     | Level 2, Form<br>Full Text<br>Screening   |
| 365 | <b>Iain Atherton, Richard Kyle.</b> How empathy skills can change nursing.. <i>Nursing standard (Royal College of Nursing (Great Britain) : 1987)</i> . 2014//. 29:24                                                                                                                                                                                                                                                                                                                                                                      | Level 1, Form<br>Title/abstract<br>screen |
| 366 | <b>Siobhan M Phillips, Russell E Glasgow, Ghalib Bello, Marcia G Ory, Beth A Glenn, Sherri N Sheinfeld-Gorin, Roy T Sabo, Suzanne Heurtin-Roberts, Sallie Beth Johnson, Alex H Krist, MOHR Study Group.</b> Frequency and prioritization of patient health risks from a structured health risk assessment.. <i>Annals of family medicine</i> . 2014//. 12:505                                                                                                                                                                              | Level 1, Form<br>Title/abstract<br>screen |
| 367 | <b>Anonymous.</b> Unique program aims to connect frequent ED utilizers with medical homes, resources to meet complex needs.. <i>ED management : the monthly update on emergency department management</i> . 2014//. 26:117                                                                                                                                                                                                                                                                                                                 | Level 1, Form<br>Title/abstract<br>screen |
| 368 | <b>Stephen A Maisto, Megan Kirouac, Katie Witkiewitz.</b> Alcohol use disorder clinical course research: informing clinicians' treatment planning now and in the future.. <i>Journal of studies on alcohol and drugs</i> . 2014//. 75:799                                                                                                                                                                                                                                                                                                  | Level 1, Form<br>Title/abstract<br>screen |

|     |                                                                                                                                                                                                                                                                                                                                                                                                           |                                           |
|-----|-----------------------------------------------------------------------------------------------------------------------------------------------------------------------------------------------------------------------------------------------------------------------------------------------------------------------------------------------------------------------------------------------------------|-------------------------------------------|
| 369 | <b>Rodger Kessler, Benjamin F Miller, Mark Kelly, Debbie Graham, Amanda Kennedy, Benjamin Littenberg, Charles D MacLean, Constance van Eeghen, Sarah Hudson Scholle, Manasi Tirodkar, Suzanne Morton, Wilson D Pace.</b> Mental health, substance abuse, and health behavior services in patient-centered medical homes.. <i>Journal of the American Board of Family Medicine : JABFM.</i> 2014//. 27:637 | Level 1, Form<br>Title/abstract<br>screen |
| 370 | <b>Nathan D Shippee, Brooke H Rosen, Kurt B Angstman, Manuel E Fuentes, Ramona S DeJesus, Steven M Bruce, Mark D Williams.</b> Baseline screening tools as indicators for symptom outcomes and health services utilization in a collaborative care model for depression in primary care: a practice-based observational study.. <i>General hospital psychiatry.</i> 2014//. 36:563                        | Level 1, Form<br>Title/abstract<br>screen |
| 371 | <b>David E Arterburn, Anita P Courcoulas.</b> Bariatric surgery for obesity and metabolic conditions in adults.. <i>BMJ (Clinical research ed.).</i> 2014//. 349:g3961                                                                                                                                                                                                                                    | Level 1, Form<br>Title/abstract<br>screen |
| 372 | <b>Laura P Richardson, Evette Ludman, Elizabeth McCauley, Jeff Lindenbaum, Cindy Larison, Chuan Zhou, Greg Clarke, David Brent, Wayne Katon.</b> Collaborative care for adolescents with depression in primary care: a randomized clinical trial.. <i>JAMA.</i> 2014//. 312:809                                                                                                                           | Level 1, Form<br>Title/abstract<br>screen |
| 373 | <b>Patrick W Corrigan, Susan Pickett, Karen Batia, Patrick J Michaels.</b> Peer navigators and integrated care to address ethnic health disparities of people with serious mental illness.. <i>Social work in public health.</i> 2014//. 29:581                                                                                                                                                           | Level 1, Form<br>Title/abstract<br>screen |
| 374 | <b>Judith Haber, Andrew I Spielman, Mark Wolff, Donna Shelley.</b> Interprofessional education between dentistry and nursing: the NYU experience.. <i>Journal of the California Dental Association.</i> 2014//. 42:44                                                                                                                                                                                     | Level 1, Form<br>Title/abstract<br>screen |
| 375 | <b>Kate Traynor.</b> Rhode Island's opioid epidemic response features collaborative practice model.. <i>American journal of health-system pharmacy : AJHP : official journal of the American Society of Health-System Pharmacists.</i> 2014//. 71:1328                                                                                                                                                    | Level 1, Form<br>Title/abstract<br>screen |
| 376 | <b>A Karger.</b> [Gender differences in depression].. <i>Bundesgesundheitsblatt, Gesundheitsforschung, Gesundheitsschutz.</i> 2014//. 57:1092                                                                                                                                                                                                                                                             | Level 1, Form<br>Title/abstract<br>screen |
| 377 | <b>Leena Mittal.</b> Buprenorphine for the treatment of opioid dependence in pregnancy.. <i>The Journal of perinatal &amp; neonatal nursing.</i> 2014//. 28:178                                                                                                                                                                                                                                           | Level 1, Form<br>Title/abstract<br>screen |
| 378 | <b>Sharon Levy, Janet F Williams.</b> Adolescent substance use: the role of the medical home.. <i>Adolescent medicine: state of the art reviews.</i> 2014//. 25:1                                                                                                                                                                                                                                         | Level 1, Form<br>Title/abstract<br>screen |
| 379 | <b>Dolly A John, Ichiro Kawachi, Christopher S Lathan, John Z Ayanian.</b> Disparities in perceived unmet need for supportive services among patients with lung cancer in the Cancer Care Outcomes Research and Surveillance Consortium.. <i>Cancer.</i> 2014//. 120:3178                                                                                                                                 | Level 1, Form<br>Title/abstract<br>screen |
| 380 | <b>Elisa Becze.</b> Centering on wellness. Tobacco cessation and whole-person healing put the focus on the patient.. <i>ONS connect.</i> 2014//. 29:26                                                                                                                                                                                                                                                    | Level 2, Form<br>Full Text<br>Screening   |
| 381 | <b>Zev Schuman-Olivier, Roger D Weiss, Bettina B Hoepfner, Jacob Borodovsky, Mark J Albanese.</b> Emerging adult age status predicts poor buprenorphine treatment retention.. <i>Journal of substance abuse treatment.</i> 2014//. 47:202                                                                                                                                                                 | Level 1, Form<br>Title/abstract<br>screen |
| 382 | <b>Joji Suzuki, Michele L Matthews, David Brick, Minh-Thuy Nguyen, Ajay D Wasan, Robert N Jamison, Andrew L Ellner, Lori W Tishler, Roger D</b>                                                                                                                                                                                                                                                           | Level 1, Form<br>Title/abstract           |

|     |                                                                                                                                                                                                                                                                                                                                                                                                                      |                                           |
|-----|----------------------------------------------------------------------------------------------------------------------------------------------------------------------------------------------------------------------------------------------------------------------------------------------------------------------------------------------------------------------------------------------------------------------|-------------------------------------------|
|     | <b>Weiss.</b> Implementation of a collaborative care management program with buprenorphine in primary care: a comparison between opioid-dependent patients and patients with chronic pain using opioids nonmedically.. <i>Journal of opioid management.</i> 2014//. 10:159                                                                                                                                           | screen                                    |
| 383 | <b>Frederic Ketterer, Linda Symons, Marie-Claire Lambrechts, Philippe Mairiaux, Lode Godderis, Lieve Peremans, Roy Remmen, Marc Vanmeerbeek.</b> What factors determine Belgian general practitioners' approaches to detecting and managing substance abuse? A qualitative study based on the I-Change Model.. <i>BMC family practice.</i> 2014//. 15:119                                                            | Level 1, Form<br>Title/abstract<br>screen |
| 384 | <b>Jay I Kumar, Melody Anthony, Steven A Crawford, Ronald A Arky, Asaf Bitton, Garth L Splinter.</b> A comparison of Tier 1 and Tier 3 medical homes under Oklahoma Medicaid program.. <i>The Journal of the Oklahoma State Medical Association.</i> 2014//. 107:157                                                                                                                                                 | Level 1, Form<br>Title/abstract<br>screen |
| 385 | <b>Kathleen P Decker, Stephanie L Peglow, Carl R Samples.</b> Participation in a novel treatment component during residential substance use treatment is associated with improved outcome: a pilot study.. <i>Addiction science &amp; clinical practice.</i> 2014//. 9:7                                                                                                                                             | Level 2, Form<br>Full Text<br>Screening   |
| 386 | <b>Richard L Brown, Paul D Moberg, Joyce B Allen, Candace T Peterson, Laura A Saunders, Mia D Croyle, Robin M Lecoanet, Sarah M Linnan, Kim Briedenbach, Scott B Caldwell.</b> A team approach to systematic behavioral screening and intervention.. <i>The American journal of managed care.</i> 2014//. 20:e113                                                                                                    | Level 1, Form<br>Title/abstract<br>screen |
| 387 | <b>Howard Epstein, Carmen Hansen, David Thorson.</b> A protocol for addressing acute pain and prescribing opioids.. <i>Minnesota medicine.</i> 2014//. 97:47                                                                                                                                                                                                                                                         | Level 1, Form<br>Title/abstract<br>screen |
| 388 | <b>Vijay Singh, Ketti Petersen, Simone Rauscher Singh.</b> Intimate partner violence victimization: identification and response in primary care.. <i>Primary care.</i> 2014//. 41:261                                                                                                                                                                                                                                | Level 1, Form<br>Title/abstract<br>screen |
| 389 | <b>Katharine A Bradley, Daniel R Kivlahan.</b> Bringing patient-centered care to patients with alcohol use disorders.. <i>JAMA.</i> 2014//. 311:1861                                                                                                                                                                                                                                                                 | Level 1, Form<br>Title/abstract<br>screen |
| 390 | <b>Yasmin Senturias, Barbara Burns.</b> Managing children and adolescents with fetal alcohol spectrum disorders in the medical home.. <i>Current problems in pediatric and adolescent health care.</i> 2014//. 44:96                                                                                                                                                                                                 | Level 1, Form<br>Title/abstract<br>screen |
| 391 | <b>Jacob L Taylor, Rebecca A McKibben, Matthew DeCamp, Margaret S Chisolm.</b> Putting a face on the prescription opioid epidemic: a case report.. <i>General hospital psychiatry.</i> 2014//. 36:449.e1                                                                                                                                                                                                             | Level 2, Form<br>Full Text<br>Screening   |
| 392 | <b>Douglas Zatzick, Joan Russo, Sarah Peregrine Lord, Christopher Varley, Jin Wang, Lucy Berliner, Gregory Jurkovich, Lauren K Whiteside, Stephen O'Connor, Frederick P Rivara.</b> Collaborative care intervention targeting violence risk behaviors, substance use, and posttraumatic stress and depressive symptoms in injured adolescents: a randomized clinical trial.. <i>JAMA pediatrics.</i> 2014//. 168:532 | Level 1, Form<br>Title/abstract<br>screen |
| 393 | <b>Dail Fields, Terry C Blum, Paul M Roman.</b> Dissemination activities: a critical new role for substance abuse treatment organizations.. <i>The journal of behavioral health services &amp; research.</i> 2014//. 41:473                                                                                                                                                                                          | Level 1, Form<br>Title/abstract<br>screen |
| 394 | <b>Joanna L Starrels, Bryan Wu, Deena Peyser, Aaron D Fox, Abigail Batchelder, Frances K Barg, Julia H Arnsten, Chinazo O Cunningham.</b> It made my life a little easier: primary care providers' beliefs and attitudes about using opioid treatment agreements.. <i>Journal of opioid management.</i> 2014//.                                                                                                      | Level 1, Form<br>Title/abstract<br>screen |

|     |                                                                                                                                                                                                                                                                                                                                                                                                                                             |                                           |
|-----|---------------------------------------------------------------------------------------------------------------------------------------------------------------------------------------------------------------------------------------------------------------------------------------------------------------------------------------------------------------------------------------------------------------------------------------------|-------------------------------------------|
|     | 10:95                                                                                                                                                                                                                                                                                                                                                                                                                                       |                                           |
| 395 | <b>Melissa M Farmer, Danielle E Rose, Lisa V Rubenstein, Ismelda A Canelo, Gordon Schectman, Richard Stark, Elizabeth M Yano.</b> Challenges facing primary care practices aiming to implement patient-centered medical homes.. <i>Journal of general internal medicine.</i> 2014//. 29 Suppl 2:S555                                                                                                                                        | Level 1, Form<br>Title/abstract<br>screen |
| 396 | <b>Jolynne Jo Carter, Annette C Watson, Patrice V Sminkey.</b> Pain management: screening and assessment of pain as part of a comprehensive case management process.. <i>Professional case management.</i> 2014//. 19:126                                                                                                                                                                                                                   | Level 1, Form<br>Title/abstract<br>screen |
| 398 | <b>Claudia Steurer-Stey, Stefan Markun, Kaba Dalla Lana, Anja Frei, Ulrike Held, Michel Wensing, Thomas Rosemann.</b> The improving care in chronic obstructive lung disease study: CAROL improving processes of care and quality of life of COPD patients in primary care: study protocol for a randomized controlled trial.. <i>Trials.</i> 2014//. 15:96                                                                                 | Level 1, Form<br>Title/abstract<br>screen |
| 399 | <b>Sofie L Champassak, Kathy Goggin, Sarah Finocchiaro-Kessler, Maghen Farris, Maniza Ehtesham, Rachel Schoor, Delwyn Catley.</b> A qualitative assessment of provider perspectives on smoking cessation counselling.. <i>Journal of evaluation in clinical practice.</i> 2014//. 20:281                                                                                                                                                    | Level 1, Form<br>Title/abstract<br>screen |
| 400 | <b>Lawrence A Palinkas, Angela M Robertson, Jennifer L Syvertsen, Daniel O Hernandez, Monica D Ulibarri, M Gudelia Rangel, Gustavo Martinex, Steffanie A Strathdee.</b> Client perspectives on design and implementation of a couples-based intervention to reduce sexual and drug risk behaviors among female sex workers and their noncommercial partners in Tijuana and Ciudad Juarez, Mexico.. <i>AIDS and behavior.</i> 2014//. 18:583 | Level 1, Form<br>Title/abstract<br>screen |
| 401 | <b>I Gilles, B Bejaoui, N Courvoisier, A Clemence.</b> Inhabitants' and professionals' social representations of health determinants in a disadvantaged urban area in France: a qualitative analysis.. <i>Revue d'epidemiologie et de sante publique.</i> 2014//. 62:5                                                                                                                                                                      | Level 1, Form<br>Title/abstract<br>screen |
| 403 | <b>Nena Messina, Stacy Calhoun, Jeremy Braithwaite.</b> Trauma-informed treatment decreases posttraumatic stress disorder among women offenders.. <i>Journal of trauma &amp; dissociation : the official journal of the International Society for the Study of Dissociation (ISSD).</i> 2014//. 15:6                                                                                                                                        | Level 1, Form<br>Title/abstract<br>screen |
| 404 | <b>Stephanie Rodgers, Martin Grosse Holtforth, Mario Muller, Michael P Hengartner, Wulf Rossler, Vladeta Ajdacic-Gross.</b> Symptom-based subtypes of depression and their psychosocial correlates: a person-centered approach focusing on the influence of sex.. <i>Journal of affective disorders.</i> 2014//. 156:92                                                                                                                     | Level 1, Form<br>Title/abstract<br>screen |
| 405 | <b>Ted J Johnson, David H Sanders, Judy L Stange.</b> The Affordable Care Act for behavioral health consumers and families.. <i>Journal of social work in disability &amp; rehabilitation.</i> 2014//. 13:110                                                                                                                                                                                                                               | Level 1, Form<br>Title/abstract<br>screen |
| 406 | <b>Daniel Almirall, Jan A Blalock.</b> Summary of the SRNT treatment network Webinar: getting SMART about developing individualized sequences of health interventions.. <i>Nicotine &amp; tobacco research : official journal of the Society for Research on Nicotine and Tobacco.</i> 2014//. 16:252                                                                                                                                       | Level 1, Form<br>Title/abstract<br>screen |
| 407 | <b>Wan-Sen Yan, Yong-Hui Li, Lin Xiao, Ning Zhu, Antoine Bechara, Nan Sui.</b> Working memory and affective decision-making in addiction: a neurocognitive comparison between heroin addicts, pathological gamblers and healthy controls.. <i>Drug and alcohol dependence.</i> 2014//. 134:194                                                                                                                                              | Level 1, Form<br>Title/abstract<br>screen |
| 408 | <b>Hyun-Hee Heo, Kathryn L Braun.</b> Culturally tailored interventions of chronic disease targeting Korean Americans: a systematic review.. <i>Ethnicity &amp; health.</i> 2014//. 19:64                                                                                                                                                                                                                                                   | Level 1, Form<br>Title/abstract<br>screen |

|     |                                                                                                                                                                                                                                                                                                                                                                                    |                                     |
|-----|------------------------------------------------------------------------------------------------------------------------------------------------------------------------------------------------------------------------------------------------------------------------------------------------------------------------------------------------------------------------------------|-------------------------------------|
| 409 | <b>Billie Bonevski.</b> System-centred tobacco management: from 'whole-person' to 'whole-system' change.. <i>Drug and alcohol review.</i> 2014//. 33:99                                                                                                                                                                                                                            | Level 2, Form Full Text Screening   |
| 410 | <b>Gillian S Gould.</b> Patient-centred tobacco management.. <i>Drug and alcohol review.</i> 2014//. 33:93                                                                                                                                                                                                                                                                         | Level 2, Form Full Text Screening   |
| 411 | <b>Van L King, Robert K Brooner, Jessica M Peirce, Ken Kolodner, Michael S Kidorf.</b> A randomized trial of Web-based videoconferencing for substance abuse counseling.. <i>Journal of substance abuse treatment.</i> 2014//. 46:36                                                                                                                                               | Level 1, Form Title/abstract screen |
| 412 | <b>Kurt B Angstman, Sara Oberhelman, James E Rohrer, Matthew R Meunier, Norman H Rasmussen, Daniel H Chappell.</b> Depression remission decreases outpatient utilization at 6 and 12 months after enrollment into collaborative care management.. <i>Population health management.</i> 2014//. 17:48                                                                               | Level 1, Form Title/abstract screen |
| 413 | <b>Kirstyn M Kameg, Nadine Cozzo Englert, Valerie M Howard, Katherine J Perozzi.</b> Fusion of psychiatric and medical high fidelity patient simulation scenarios: effect on nursing student knowledge, retention of knowledge, and perception.. <i>Issues in mental health nursing.</i> 2013//. 34:892                                                                            | Level 1, Form Title/abstract screen |
| 414 | <b>Stella M Savarimuthu, Ashley E Jensen, Antoinette Schoenthaler, Anne Dembitzer, Craig Tenner, Colleen Gillespie, Mark D Schwartz, Scott E Sherman.</b> Developing a toolkit for panel management: improving hypertension and smoking cessation outcomes in primary care at the VA.. <i>BMC family practice.</i> 2013//. 14:176                                                  | Level 1, Form Title/abstract screen |
| 415 | <b>Neelam Mabood, Samina Ali, Kathryn A Dong, T Cameron Wild, Amanda S Newton.</b> Experiences of pediatric emergency physicians in providing alcohol-related care to adolescents in the emergency department.. <i>Pediatric emergency care.</i> 2013//. 29:1260                                                                                                                   | Level 1, Form Title/abstract screen |
| 416 | <b>Karen E Lasser, Karey S Kenst, Lisa M Quintiliani, Renda Soylemez Wiener, Jennifer Murillo, Lori Pbert, Ziming Xuan, Deborah J Bowen.</b> Patient navigation to promote smoking cessation among low-income primary care patients: a pilot randomized controlled trial.. <i>Journal of ethnicity in substance abuse.</i> 2013//. 12:374                                          | Level 1, Form Title/abstract screen |
| 417 | <b>Amber Cornforth.</b> COPD self-management supportive care: chaos and complexity theory.. <i>British journal of nursing (Mark Allen Publishing).</i> 2013//. 22:1101                                                                                                                                                                                                             | Level 1, Form Title/abstract screen |
| 418 | <b>Thomas P O'Toole, Claire Bourgault, Erin E Johnson, Stephen G Redihan, Matthew Borgia, Riccardo Aiello, Vincent Kane.</b> New to care: demands on a health system when homeless veterans are enrolled in a medical home model.. <i>American journal of public health.</i> 2013//. 103 Suppl 2:S374                                                                              | Level 1, Form Title/abstract screen |
| 419 | <b>Susanne Buhse, Tabitha Heller, Jurgen Kasper, Ingrid Muhlhauser, Ulrich Alfons Muller, Thomas Lehmann, Matthias Lenz.</b> An evidence-based shared decision making programme on the prevention of myocardial infarction in type 2 diabetes: protocol of a randomised-controlled trial.. <i>BMC family practice.</i> 2013//. 14:155                                              | Level 1, Form Title/abstract screen |
| 420 | <b>Nickeisha Clarke, Eun-Young Mun, Shalonda Kelly, Helene R White, Katherine Lynch.</b> Treatment outcomes of a combined cognitive behavior therapy and pharmacotherapy for a sample of women with and without substance abuse histories on an acute psychiatric unit: do therapeutic alliance and motivation matter?.. <i>The American journal on addictions.</i> 2013//. 22:566 | Level 1, Form Title/abstract screen |
| 423 | <b>Jennifer K Manuel, Howard Newville, Sandra E Larios, James L Sorensen.</b> Confidentiality protections versus collaborative care in the treatment of                                                                                                                                                                                                                            | Level 1, Form Title/abstract        |

|     |                                                                                                                                                                                                                                                                                                                                                                                                                                                                       |                                           |
|-----|-----------------------------------------------------------------------------------------------------------------------------------------------------------------------------------------------------------------------------------------------------------------------------------------------------------------------------------------------------------------------------------------------------------------------------------------------------------------------|-------------------------------------------|
|     | substance use disorders.. <i>Addiction science &amp; clinical practice</i> . 2013//. 8:13                                                                                                                                                                                                                                                                                                                                                                             | screen                                    |
| 424 | <b>Janice Pettie</b> . Toxicology had to be the focus, not psychological care.. <i>Nursing standard (Royal College of Nursing (Great Britain) : 1987)</i> . 2013//. 27:33                                                                                                                                                                                                                                                                                             | Level 1, Form<br>Title/abstract<br>screen |
| 425 | <b>David A Richards, Jacqueline J Hill, Linda Gask, Karina Lovell, Carolyn Chew-Graham, Peter Bower, John Cape, Stephen Pilling, Ricardo Araya, David Kessler, J Martin Bland, Colin Green, Simon Gilbody, Glyn Lewis, Chris Manning, Adwoa Hughes-Morley, Michael Barkham</b> . Clinical effectiveness of collaborative care for depression in UK primary care (CADET): cluster randomised controlled trial.. <i>BMJ (Clinical research ed.)</i> . 2013//. 347:f4913 | Level 1, Form<br>Title/abstract<br>screen |
| 426 | <b>Ted Nirenberg, Richard Longabaugh, Janette Baird, Michael J Mello</b> . Treatment may influence self-report and jeopardize our understanding of outcome.. <i>Journal of studies on alcohol and drugs</i> . 2013//. 74:770                                                                                                                                                                                                                                          | Level 1, Form<br>Title/abstract<br>screen |
| 427 | <b>William S Blau</b> . The needle in a haystack: appropriate use of interventional techniques in the management of chronic pain.. <i>North Carolina medical journal</i> . 2013//. 74:215                                                                                                                                                                                                                                                                             | Level 1, Form<br>Title/abstract<br>screen |
| 428 | <b>David L Bell, David J Breland, Mary A Ott</b> . Adolescent and young adult male health: a review.. <i>Pediatrics</i> . 2013//. 132:535                                                                                                                                                                                                                                                                                                                             | Level 1, Form<br>Title/abstract<br>screen |
| 429 | <b>Laura R Lander, Patrick Marshalek, Miheret Yitayew, Dolly Ford, Carl R Sullivan, Kelly K Gurka</b> . Rural healthcare disparities: challenges and solutions for the pregnant opioid-dependent population.. <i>The West Virginia medical journal</i> . 2013//. 109:22                                                                                                                                                                                               | Level 1, Form<br>Title/abstract<br>screen |
| 430 | <b>Sarah Biggs</b> . Don't overlook psychological care in paracetamol overdose.. <i>Nursing standard (Royal College of Nursing (Great Britain) : 1987)</i> . 2013//. 27:33                                                                                                                                                                                                                                                                                            | Level 1, Form<br>Title/abstract<br>screen |
| 431 | <b>Marcia S Seeberg, Mark Scarbecz, Timothy L Hottel</b> . An innovative behavioral science curriculum at the University of Tennessee College of Dentistry.. <i>The Journal of the Tennessee Dental Association</i> . 2013//. 93:31                                                                                                                                                                                                                                   | Level 1, Form<br>Title/abstract<br>screen |
| 432 | <b>Cheryl J Ho, Charles Preston, Kim Fredericks, Sara L Doorley, Richard J Kramer, Lawrence Kwan, Ahmad Kamal</b> . A unique model for treating chronic hepatitis C in patients with psychiatric disorders, substance abuse, and/or housing instability.. <i>Journal of addiction medicine</i> . 2013//. 7:320                                                                                                                                                        | Level 1, Form<br>Title/abstract<br>screen |
| 433 | <b>K Van Royen, R Remmen, M Vanmeerbeek, L Godderis, P Mairiaux, L Peremans</b> . A review of guidelines for collaboration in substance misuse management.. <i>Occupational medicine (Oxford, England)</i> . 2013//. 63:445                                                                                                                                                                                                                                           | Level 1, Form<br>Title/abstract<br>screen |
| 434 | <b>Marica Ferri, Marina Davoli, Roberto D'Amico</b> . Involving patients in setting the research agenda in drug addiction.. <i>BMJ (Clinical research ed.)</i> . 2013//. 347:f4513                                                                                                                                                                                                                                                                                    | Level 1, Form<br>Title/abstract<br>screen |
| 435 | <b>Tonelle E Handley, Frances J Kay-Lambkin, Amanda L Baker, Terry J Lewin, Brian J Kelly, Kerry J Inder, John R Attia, David J Kavanagh</b> . Incidental treatment effects of CBT on suicidal ideation and hopelessness.. <i>Journal of affective disorders</i> . 2013//. 151:275                                                                                                                                                                                    | Level 2, Form<br>Full Text<br>Screening   |
| 436 | <b>Carmela Salomon, Bridget Hamilton</b> . "All roads lead to medication?" Qualitative responses from an Australian first-person survey of antipsychotic discontinuation.. <i>Psychiatric rehabilitation journal</i> . 2013//. 36:160                                                                                                                                                                                                                                 | Level 1, Form<br>Title/abstract<br>screen |
| 437 | <b>Ashly E Jordan, Carmen L Masson, Pedro Mateu-Gelabert, Courtney McKnight, Nicole Pepper, Katie Bouche, Laura Guzman, Evan Kletter,</b>                                                                                                                                                                                                                                                                                                                             | Level 1, Form<br>Title/abstract           |



|     |                                                                                                                                                                                                                                                                                                                                                                                                                                       |                                     |
|-----|---------------------------------------------------------------------------------------------------------------------------------------------------------------------------------------------------------------------------------------------------------------------------------------------------------------------------------------------------------------------------------------------------------------------------------------|-------------------------------------|
|     | <b>Randy M Seewald, Don C Des-Jarlais, James L Sorensen, David C Perlman.</b> Perceptions of drug users regarding hepatitis C screening and care: a qualitative study.. <i>Harm reduction journal</i> . 2013//. 10:10                                                                                                                                                                                                                 | screen                              |
| 439 | <b>Leah Farrell-Carnahan, Jennifer Hetteema, Justin Jackson, Shivi Kamalanathan, Lee M Ritterband, Karen S Ingersoll.</b> Feasibility and promise of a remote-delivered preconception motivational interviewing intervention to reduce risk for alcohol-exposed pregnancy.. <i>Telemedicine journal and e-health : the official journal of the American Telemedicine Association</i> . 2013//. 19:597                                 | Level 1, Form Title/abstract screen |
| 440 | <b>Marsha Snyder, Lois Platt.</b> Substance use and brain reward mechanisms in older adults.. <i>Journal of psychosocial nursing and mental health services</i> . 2013//. 51:15                                                                                                                                                                                                                                                       | Level 1, Form Title/abstract screen |
| 441 | <b>Abigail Zuger.</b> Talking to patients in the 21st century.. <i>JAMA</i> . 2013//. 309:2384                                                                                                                                                                                                                                                                                                                                        | Level 1, Form Title/abstract screen |
| 443 | <b>Eric D Shirley, James O Sanders.</b> Patient satisfaction: Implications and predictors of success.. <i>The Journal of bone and joint surgery. American volume</i> . 2013//. 95:e69                                                                                                                                                                                                                                                 | Level 1, Form Title/abstract screen |
| 444 | <b>Jeanne Miranda, Michael K Ong, Loretta Jones, Bowen Chung, Elizabeth L Dixon, Lingqi Tang, Jim Gilmore, Cathy Sherbourne, Victoria K Ngo, Susan Stockdale, Esmeralda Ramos, Thomas R Belin, Kenneth B Wells.</b> Community-partnered evaluation of depression services for clients of community-based agencies in under-resourced communities in Los Angeles.. <i>Journal of general internal medicine</i> . 2013//. 28:1279       | Level 1, Form Title/abstract screen |
| 445 | <b>Areej Hassan, Emily A Blood, Aaron Pikilingis, Emily G Krull, LaQuita McNickles, Glenn Marmon, Sarah Wylie, Elizabeth R Woods, Eric W Flegler.</b> Youths' health-related social problems: concerns often overlooked during the medical visit.. <i>The Journal of adolescent health : official publication of the Society for Adolescent Medicine</i> . 2013//. 53:265                                                             | Level 1, Form Title/abstract screen |
| 446 | <b>Adam Isaiah Newman, Shelley Beckstead, David Beking, Susan Finch, Tina Knorr, Carol Lynch, Meredith MacKenzie, Daphne Mayer, Brenda Melles, Ron Shore.</b> Treatment of chronic hepatitis C infection among current and former injection drug users within a multidisciplinary treatment model at a community health centre.. <i>Canadian journal of gastroenterology = Journal canadien de gastroenterologie</i> . 2013//. 27:217 | Level 1, Form Title/abstract screen |
| 447 | <b>William C Becker, Liana Fraenkel, Robert D Kerns, David A Fiellin.</b> A research agenda for enhancing appropriate opioid prescribing in primary care.. <i>Journal of general internal medicine</i> . 2013//. 28:1364                                                                                                                                                                                                              | Level 1, Form Title/abstract screen |
| 448 | <b>Frank R Dillon.</b> Measurement equivalence of the Revised Helping Alliance Questionnaire across African American and non-Latino White substance using adult outpatients.. <i>Journal of substance abuse treatment</i> . 2013//. 45:173                                                                                                                                                                                            | Level 1, Form Title/abstract screen |
| 449 | <b>Alexandre B Laudet, Keith Humphreys.</b> Promoting recovery in an evolving policy context: what do we know and what do we need to know about recovery support services?.. <i>Journal of substance abuse treatment</i> . 2013//. 45:126                                                                                                                                                                                             | Level 1, Form Title/abstract screen |
| 450 | <b>Samantha Wolfe, Frances Kay-Lambkin, Jenny Bowman, Steven Childs.</b> To enforce or engage: the relationship between coercion, treatment motivation and therapeutic alliance within community-based drug and alcohol clients.. <i>Addictive behaviors</i> . 2013//. 38:2187                                                                                                                                                        | Level 1, Form Title/abstract screen |
| 451 | <b>David R Veroff, Tamara Ochoa-Arvelo, Benjamin Venator.</b> A randomized study of telephonic care support in populations at risk for musculoskeletal                                                                                                                                                                                                                                                                                | Level 1, Form Title/abstract        |

|     |                                                                                                                                                                                                                                                                                                                                                                                                                                                                                                       |                                           |
|-----|-------------------------------------------------------------------------------------------------------------------------------------------------------------------------------------------------------------------------------------------------------------------------------------------------------------------------------------------------------------------------------------------------------------------------------------------------------------------------------------------------------|-------------------------------------------|
|     | preference-sensitive surgeries.. <i>BMC medical informatics and decision making</i> . 2013//. 13:21                                                                                                                                                                                                                                                                                                                                                                                                   | screen                                    |
| 452 | <b>Kristin A Hom, Stephanie J Woods</b> . Trauma and its aftermath for commercially sexually exploited women as told by front-line service providers.. <i>Issues in mental health nursing</i> . 2013//. 34:75                                                                                                                                                                                                                                                                                         | Level 1, Form<br>Title/abstract<br>screen |
| 453 | <b>Richard Wender, Elizabeth T H Fontham, Ermilo Jr Barrera, Graham A Colditz, Timothy R Church, David S Ettinger, Ruth Etzioni, Christopher R Flowers, G Scott Gazelle, Douglas K Kelsey, Samuel J LaMonte, James S Michaelson, Kevin C Oeffinger, Ya-Chen Tina Shih, Daniel C Sullivan, William Travis, Louise Walter, Andrew M D Wolf, Otis W Brawley, Robert A Smith</b> . American Cancer Society lung cancer screening guidelines.. <i>CA: a cancer journal for clinicians</i> . 2013//. 63:107 | Level 1, Form<br>Title/abstract<br>screen |
| 455 | <b>Harlan Matusow, Andrew Rosenblum</b> . The most critical unresolved issue associated with: psychoanalytic theories of addiction: can the talking cure tell us anything about substance use and misuse?.. <i>Substance use &amp; misuse</i> . 2013//. 48:239                                                                                                                                                                                                                                        | Level 1, Form<br>Title/abstract<br>screen |
| 456 | <b>Teresa M Salgado, Rebekah Moles, Shalom I Benrimoj, Fernando Fernandez-Llimos</b> . Exploring the role of pharmacists in outpatient dialysis centers: a qualitative study of nephrologist views.. <i>Nephrology, dialysis, transplantation : official publication of the European Dialysis and Transplant Association - European Renal Association</i> . 2013//. 28:397                                                                                                                            | Level 1, Form<br>Title/abstract<br>screen |
| 457 | <b>R McLaurin, S Geraghty</b> . Placenta praevia, placental abruption and amphetamine use in pregnancy: a case study.. <i>Women and birth : journal of the Australian College of Midwives</i> . 2013//. 26:138                                                                                                                                                                                                                                                                                        | Level 1, Form<br>Title/abstract<br>screen |
| 458 | <b>Jessica De Maeyer, Chijs van Nieuwenhuizen, Ilja L Bongers, Eric Broekaert, Wouter Vanderplasschen</b> . Profiles of quality of life in opiate-dependent individuals after starting methadone treatment: a latent class analysis.. <i>The International journal on drug policy</i> . 2013//. 24:342                                                                                                                                                                                                | Level 1, Form<br>Title/abstract<br>screen |
| 459 | <b>Karine Bertrand, Natacha Brunelle, Isabelle Richer, Isabelle Beaudoin, Annie Lemieux, Jean-Marc Menard</b> . Assessing covariates of drug use trajectories among adolescents admitted to a drug addiction center: mental health problems, therapeutic alliance, and treatment persistence.. <i>Substance use &amp; misuse</i> . 2013//. 48:117                                                                                                                                                     | Level 1, Form<br>Title/abstract<br>screen |
| 460 | <b>Stuart J Lee, Elizabeth Crowther, Charlotte Keating, Jayashri Kulkarni</b> . What is needed to deliver collaborative care to address comorbidity more effectively for adults with a severe mental illness?.. <i>The Australian and New Zealand journal of psychiatry</i> . 2013//. 47:333                                                                                                                                                                                                          | Level 1, Form<br>Title/abstract<br>screen |
| 462 | <b>Jon M Houck, Theresa B Moyers, Claudia D Tesche</b> . Through a glass darkly: some insights on change talk via magnetoencephalography.. <i>Psychology of addictive behaviors : journal of the Society of Psychologists in Addictive Behaviors</i> . 2013//. 27:489                                                                                                                                                                                                                                 | Level 1, Form<br>Title/abstract<br>screen |
| 463 | <b>Barbara K Campbell, Jennifer K Manuel, Sarah Turcotte Manser, K Michelle Peavy, Julija Stelmokas, Dennis McCarty, Joseph R Guldish</b> . Assessing fidelity of treatment delivery in group and individual 12-step facilitation.. <i>Journal of substance abuse treatment</i> . 2013//. 44:169                                                                                                                                                                                                      | Level 1, Form<br>Title/abstract<br>screen |
| 464 | <b>Ameera Aldossary, Louise Barriball, Alison While</b> . The perceived health promotion practice of nurses in Saudi Arabia.. <i>Health promotion international</i> . 2013//. 28:431                                                                                                                                                                                                                                                                                                                  | Level 1, Form<br>Title/abstract<br>screen |
| 465 | <b>Matthew Brensilver, Shabana Tariq, Steven Shoptaw</b> . Optimizing pain management through collaborations with behavioral and addiction medicine in                                                                                                                                                                                                                                                                                                                                                | Level 1, Form<br>Title/abstract           |

|     |                                                                                                                                                                                                                                                                                                                                                               |                                     |
|-----|---------------------------------------------------------------------------------------------------------------------------------------------------------------------------------------------------------------------------------------------------------------------------------------------------------------------------------------------------------------|-------------------------------------|
|     | primary care.. <i>Primary care</i> . 2012//. 39:661                                                                                                                                                                                                                                                                                                           | screen                              |
| 466 | <b>Michelle Anne Bholat, Lara Ray, Matthew Brensilver, Kimberly Ling, Steven Shoptaw.</b> Integration of behavioral medicine in primary care.. <i>Primary care</i> . 2012//. 39:605                                                                                                                                                                           | Level 1, Form Title/abstract screen |
| 467 | <b>Adam Pearson, Jon Lurie, Tor Tosteson, Wenyan Zhao, William Abdu, James N Weinstein.</b> Who should have surgery for spinal stenosis? Treatment effect predictors in SPORT.. <i>Spine</i> . 2012//. 37:1791                                                                                                                                                | Level 1, Form Title/abstract screen |
| 468 | <b>Justin B Hunt, Geoffrey Curran, Teresa Kramer, Sip Mouden, Susan Ward-Jones, Richard Owen, John Fortney.</b> Partnership for implementation of evidence-based mental health practices in rural federally qualified health centers: theory and methods.. <i>Progress in community health partnerships : research, education, and action</i> . 2012//. 6:389 | Level 1, Form Title/abstract screen |
| 469 | <b>Robert J Ursano, David M Benedek, Charles C Engel.</b> Trauma-informed care for primary care: the lessons of war.. <i>Annals of internal medicine</i> . 2012//. 157:905                                                                                                                                                                                    | Level 1, Form Title/abstract screen |
| 470 | <b>Pierre C Baehni.</b> Translating science into action--prevention of periodontal disease at patient level.. <i>Periodontology 2000</i> . 2012//. 60:162                                                                                                                                                                                                     | Level 1, Form Title/abstract screen |
| 471 | <b>Chih-Lin Chi, W Nick Street, Jennifer G Robinson, Matthew A Crawford.</b> Individualized patient-centered lifestyle recommendations: an expert system for communicating patient specific cardiovascular risk information and prioritizing lifestyle options.. <i>Journal of biomedical informatics</i> . 2012//. 45:1164                                   | Level 1, Form Title/abstract screen |
| 472 | <b>David B Cooper, Jo Cooper.</b> "Palliative care can sustain and support mental health clients" .. <i>Nursing times</i> . 2012//. 108:11                                                                                                                                                                                                                    | Level 1, Form Title/abstract screen |
| 473 | <b>Rosalyn Stewart, Leonard Feldman, Daniel Bitzel, M Christopher Gibbons, Maura McGuire.</b> Urban health and primary care at Johns Hopkins: urban primary care medical home resident training programs.. <i>Journal of health care for the poor and underserved</i> . 2012//. 23:103                                                                        | Level 1, Form Title/abstract screen |
| 474 | <b>Kathleen F Harrington, Julie A McDougal, Maria Pisu, Bin Zhang, Rajani S Sadasivam, Thomas K Houston, William C Bailey, CHART Collaborative Group.</b> Web-based smoking cessation intervention that transitions from inpatient to outpatient: study protocol for a randomized controlled trial.. <i>Trials</i> . 2012//. 13:123                           | Level 1, Form Title/abstract screen |
| 475 | <b>Frances J Kay-Lambkin, Amanda L Baker, Alison Healey, Samantha Wolfe, Aaron Simpson, Michelle Brooks, Jenny Bowman, Steven Childs.</b> Study protocol: a dissemination trial of computerized psychological treatment for depression and alcohol/other drug use comorbidity in an Australian clinical service.. <i>BMC psychiatry</i> . 2012//. 12:77       | Level 1, Form Title/abstract screen |
| 476 | <b>John Muench, Kelly Jarvis, Josh Boverman, Joseph Hardman, Meg Hayes, Jim Winkle.</b> Tilling the soil while sowing the seeds: combining resident education with medical home transformation.. <i>Substance abuse</i> . 2012//. 33:282                                                                                                                      | Level 1, Form Title/abstract screen |
| 477 | <b>Jennifer Askew Buxton, Alison Chandler-Altendorf, Antonio E Puente.</b> A novel collaborative practice model for treatment of mental illness in indigent and uninsured patients.. <i>American journal of health-system pharmacy : AJHP : official journal of the American Society of Health-System Pharmacists</i> . 2012//. 69:1054                       | Level 1, Form Title/abstract screen |
| 478 | <b>Robert L Dupont, Gregory E Skipper.</b> Six lessons from state physician health programs to promote long-term recovery.. <i>Journal of psychoactive drugs</i> .                                                                                                                                                                                            | Level 2, Form Full Text             |

|     |                                                                                                                                                                                                                                                                                                                                                                                               |                                     |
|-----|-----------------------------------------------------------------------------------------------------------------------------------------------------------------------------------------------------------------------------------------------------------------------------------------------------------------------------------------------------------------------------------------------|-------------------------------------|
|     | 2012//. 44:72                                                                                                                                                                                                                                                                                                                                                                                 | Screening                           |
| 479 | <b>Ernest Rasyidi, Jeffery N Wilkins, Itai Danovitch.</b> Training the next generation of providers in addiction medicine.. <i>The Psychiatric clinics of North America.</i> 2012//. 35:461                                                                                                                                                                                                   | Level 1, Form Title/abstract screen |
| 480 | <b>David R Pating, Michael M Miller, Eric Goplerud, Judith Martin, Douglas M Ziedonis.</b> New systems of care for substance use disorders: treatment, finance, and technology under health care reform.. <i>The Psychiatric clinics of North America.</i> 2012//. 35:327                                                                                                                     | Level 1, Form Title/abstract screen |
| 481 | <b>Larry Culpepper.</b> Does screening for depression in primary care improve outcome?.. <i>Current psychiatry reports.</i> 2012//. 14:345                                                                                                                                                                                                                                                    | Level 1, Form Title/abstract screen |
| 482 | <b>Todd Molfenter, Victor A Capoccia, Michael G Boyle, Carol K Sherbeck.</b> The readiness of addiction treatment agencies for health care reform.. <i>Substance abuse treatment, prevention, and policy.</i> 2012//. 7:16                                                                                                                                                                    | Level 1, Form Title/abstract screen |
| 483 | <b>Viviane Rohart.</b> [Modifying the relationship with psychoactive substances].. <i>Revue de l'infirmiere.</i> 2012//. #volume#:22                                                                                                                                                                                                                                                          | Level 1, Form Title/abstract screen |
| 484 | <b>Marie-Line Raynal, Fabienne Plancon, Claire du Lac, Sylvie Fourchault, Fabienne Rinaudo, Caroline Buchsbaum, Didier Touzeau.</b> [Alcohol, an addiction like any other].. <i>Revue de l'infirmiere.</i> 2012//. #volume#:14                                                                                                                                                                | Level 2, Form Full Text Screening   |
| 485 | <b>Jason E Bonner, A Sidney 4th Barritt, Michael W Fried, Donna M Evon.</b> Tangible resources for preparing patients for antiviral therapy for chronic hepatitis C.. <i>Digestive diseases and sciences.</i> 2012//. 57:1439                                                                                                                                                                 | Level 1, Form Title/abstract screen |
| 486 | <b>Nicole M Capezza, Lisa M Najavits.</b> Rates of trauma-informed counseling at substance abuse treatment facilities: reports from over 10,000 programs.. <i>Psychiatric services (Washington, D.C.).</i> 2012//. 63:390                                                                                                                                                                     | Level 2, Form Full Text Screening   |
| 488 | <b>Aleksandra Zgierska, Michael Miller, David Rabago.</b> Patient satisfaction, prescription drug abuse, and potential unintended consequences.. <i>JAMA.</i> 2012//. 307:1377                                                                                                                                                                                                                | Level 1, Form Title/abstract screen |
| 489 | <b>Mary Rosedale, Dolores Malaspina, Daniel Malamud, Shiela M Strauss, Jaclyn D Horne, Salman Abouzieed, Ricardo A Cruciani, Helena Knotkova.</b> Developing patient-centered treatment protocols in brain stimulation: a rationale for combining quantitative and qualitative approaches in persons with HIV.. <i>Journal of the American Psychiatric Nurses Association.</i> 2012//. 18:166 | Level 1, Form Title/abstract screen |
| 490 | <b>Susan Kaiser.</b> Psychiatric and addiction consultation for patients in critical care.. <i>Critical care nursing clinics of North America.</i> 2012//. 24:9                                                                                                                                                                                                                               | Level 1, Form Title/abstract screen |
| 491 | <b>Amal Abdel-Baki, Clairelaine Ouellet-Plamondon, Ashok Malla.</b> Pharmacotherapy challenges in patients with first-episode psychosis.. <i>Journal of affective disorders.</i> 2012//. 138 Suppl:S3                                                                                                                                                                                         | Level 1, Form Title/abstract screen |
| 492 | <b>Melou Jansen, Marleen M E M van Doorn, Anna Lichtwarck-Aschoff, Rowella C W M Kuijpers, Huub Theunissen, Mirjam Korte, Jose van Rossum, Annemiek Wauben, Isabela Granic.</b> Effectiveness of a cognitive-behavioral therapy (CBT) manualized program for clinically anxious children: study protocol of a randomized controlled trial.. <i>BMC psychiatry.</i> 2012//. 12:16              | Level 1, Form Title/abstract screen |
| 493 | <b>Rodger Kessler.</b> Mental health care treatment initiation when mental health services are incorporated into primary care practice.. <i>Journal of the American Board of Family Medicine : JABFM.</i> 2012//. 25:255                                                                                                                                                                      | Level 1, Form Title/abstract screen |

|     |                                                                                                                                                                                                                                                                                                                                                                                                      |                                           |
|-----|------------------------------------------------------------------------------------------------------------------------------------------------------------------------------------------------------------------------------------------------------------------------------------------------------------------------------------------------------------------------------------------------------|-------------------------------------------|
| 494 | <b>Karen-leigh Edward, Rhonda Nelson Hearity, Boyce Felstead.</b> Service integration for the dually diagnosed.. <i>Australian journal of primary health.</i> 2012//. 18:17                                                                                                                                                                                                                          | Level 1, Form<br>Title/abstract<br>screen |
| 495 | <b>Muhsin Michael Orsini, David L Wyrick, Jeffrey J Milroy.</b> Collaborative evaluation of a high school prevention curriculum: How methods of collaborative evaluation enhanced a randomized control trial to inform program improvement.. <i>Evaluation and program planning.</i> 2012//. 35:529                                                                                                  | Level 1, Form<br>Title/abstract<br>screen |
| 496 | <b>Hein de Haan, Evelien Joosten, Toon Wijdeveld, Peter Boswinkel, Job van der Palen, Cor De Jong.</b> Alexithymia is not a stable personality trait in patients with substance use disorders.. <i>Psychiatry research.</i> 2012//. 198:123                                                                                                                                                          | Level 1, Form<br>Title/abstract<br>screen |
| 497 | <b>David L Mintz, David F Flynn.</b> How (not what) to prescribe: nonpharmacologic aspects of psychopharmacology.. <i>The Psychiatric clinics of North America.</i> 2012//. 35:143                                                                                                                                                                                                                   | Level 1, Form<br>Title/abstract<br>screen |
| 498 | <b>Katherine Newman Taylor, Suzanne Sambrook.</b> CBT for culture change: formulating teams to improve patient care.. <i>Behavioural and cognitive psychotherapy.</i> 2012//. 40:496                                                                                                                                                                                                                 | Level 1, Form<br>Title/abstract<br>screen |
| 499 | <b>David Mechanic.</b> Seizing opportunities under the Affordable Care Act for transforming the mental and behavioral health system.. <i>Health affairs (Project Hope).</i> 2012//. 31:376                                                                                                                                                                                                           | Level 1, Form<br>Title/abstract<br>screen |
| 501 | <b>Kim A Hoffman, Carla A Green, James H 2nd Ford, Jennifer P Wisdom, David H Gustafson, Dennis McCarty.</b> Improving quality of care in substance abuse treatment using five key process improvement principles.. <i>The journal of behavioral health services &amp; research.</i> 2012//. 39:234                                                                                                  | Level 2, Form<br>Full Text<br>Screening   |
| 502 | <b>Kenneth Wilson, Angela Halsey, Helen Macpherson, Jane Billington, Sharon Hill, Gavin Johnson, Keerthy Raju, Pat Abbott.</b> The psycho-social rehabilitation of patients with alcohol-related brain damage in the community.. <i>Alcohol and alcoholism (Oxford, Oxfordshire).</i> 2012//. 47:304                                                                                                 | Level 1, Form<br>Title/abstract<br>screen |
| 503 | <b>William Robinson, Sarah Moody-Thomas, Deann Gruber.</b> Patient perspectives on tobacco cessation services for persons living with HIV/AIDS.. <i>AIDS care.</i> 2012//. 24:71                                                                                                                                                                                                                     | Level 1, Form<br>Title/abstract<br>screen |
| 505 | <b>Dail Fields, Paul M Roman, Terry C Blum.</b> Management systems, patient quality improvement, resource availability, and substance abuse treatment quality.. <i>Health services research.</i> 2012//. 47:1068                                                                                                                                                                                     | Level 2, Form<br>Full Text<br>Screening   |
| 506 | <b>Marina A Bornovalova, Kim L Gratz, Stacey B Daughters, Elizabeth D Hunt, C W Lejuez.</b> Initial RCT of a distress tolerance treatment for individuals with substance use disorders.. <i>Drug and alcohol dependence.</i> 2012//. 122:70                                                                                                                                                          | Level 1, Form<br>Title/abstract<br>screen |
| 507 | <b>Thomas M Kelly, Dennis C Daley, Antoine B Douaihy.</b> Treatment of substance abusing patients with comorbid psychiatric disorders.. <i>Addictive behaviors.</i> 2012//. 37:11                                                                                                                                                                                                                    | Level 2, Form<br>Full Text<br>Screening   |
| 508 | <b>Jennifer Broom, David Sowden, Merran Williams, Kuong Taing, Karen Morwood, Karen McGill.</b> Moving from viral suppression to comprehensive patient-centered care: the high prevalence of comorbid conditions and health risk factors in HIV-1-infected patients in Australia.. <i>Journal of the International Association of Physicians in AIDS Care (Chicago, Ill. : 2002).</i> 2012//. 11:109 | Level 1, Form<br>Title/abstract<br>screen |
| 509 | <b>David Misdrahi, Marion Petit, Olivier Blanc, Franck Bayle, Pierre-Michel Llorca.</b> The influence of therapeutic alliance and insight on medication adherence in schizophrenia.. <i>Nordic journal of psychiatry.</i> 2012//. 66:49                                                                                                                                                              | Level 1, Form<br>Title/abstract<br>screen |
| 510 | <b>Helen-Maria Lekas, Karolynn Siegel, Jason Leider.</b> Challenges facing providers caring for HIV/HCV-coinfected patients.. <i>Qualitative health research.</i>                                                                                                                                                                                                                                    | Level 1, Form<br>Title/abstract           |

|     |                                                                                                                                                                                                                                                                                                                                                                                                                        |                                     |
|-----|------------------------------------------------------------------------------------------------------------------------------------------------------------------------------------------------------------------------------------------------------------------------------------------------------------------------------------------------------------------------------------------------------------------------|-------------------------------------|
|     | 2012//. 22:54                                                                                                                                                                                                                                                                                                                                                                                                          | screen                              |
| 511 | <b>Angela Patterson.</b> Behaviour change to treat overactive bladder syndrome.. <i>Nursing times.</i> 2011//. 107:16                                                                                                                                                                                                                                                                                                  | Level 1, Form Title/abstract screen |
| 512 | <b>Len Fromer.</b> Implementing chronic care for COPD: planned visits, care coordination, and patient empowerment for improved outcomes.. <i>International journal of chronic obstructive pulmonary disease.</i> 2011//. 6:605                                                                                                                                                                                         | Level 1, Form Title/abstract screen |
| 513 | <b>Rajani S Sadasivam, Kathryn Delaughter, Katie Crenshaw, Heather J Sobko, Jessica H Williams, Heather L Coley, Midge N Ray, Daniel E Ford, Jeroan J Allison, Thomas K Houston.</b> Development of an interactive, Web-delivered system to increase provider-patient engagement in smoking cessation.. <i>Journal of medical Internet research.</i> 2011//. 13:e87                                                    | Level 1, Form Title/abstract screen |
| 514 | <b>Maria C Raven, Kelly M Doran, Shannon Kostrowski, Colleen C Gillespie, Brian D Elbel.</b> An intervention to improve care and reduce costs for high-risk patients with frequent hospital admissions: a pilot study.. <i>BMC health services research.</i> 2011//. 11:270                                                                                                                                            | Level 1, Form Title/abstract screen |
| 515 | <b>Rani Marx, Michael J Drennan, Elizabeth C Johnson, Anne M Hirozawa, Winnie M Tse, Mitchell H Katz.</b> Assessing and increasing patient panel size in the public sector.. <i>Journal of public health management and practice : JPHMP.</i> 2011//. 17:506                                                                                                                                                           | Level 1, Form Title/abstract screen |
| 516 | <b>Gordon O Matheson, Martin Klugl, Jiri Dvorak, Lars Engebretsen, Willem H Meeuwisse, Martin Schwellnus, Steven N Blair, Willem van Mechelen, Wayne Derman, Mats Borjesson, Fredrik Bendiksen, Richard Weiler.</b> Responsibility of sport and exercise medicine in preventing and managing chronic disease: applying our knowledge and skill is overdue.. <i>British journal of sports medicine.</i> 2011//. 45:1272 | Level 1, Form Title/abstract screen |
| 517 | <b>Allen Smart, Kate B Reynolds, Susan Yaggy.</b> Integrating substance abuse treatment into the medical home.. <i>North Carolina medical journal.</i> 2011//. 72:245                                                                                                                                                                                                                                                  | Level 1, Form Title/abstract screen |
| 518 | <b>Linda Rosenberg.</b> Addressing trauma in mental health and substance use treatment.. <i>The journal of behavioral health services &amp; research.</i> 2011//. 38:428                                                                                                                                                                                                                                               | Level 1, Form Title/abstract screen |
| 519 | <b>Trijntje Y G van der Voort, Berno van Meijel, Peter J J Goossens, Janwillem Renes, Aartjan T F Beekman, Ralph W Kupka.</b> Collaborative care for patients with bipolar disorder: a randomised controlled trial.. <i>BMC psychiatry.</i> 2011//. 11:133                                                                                                                                                             | Level 1, Form Title/abstract screen |
| 520 | <b>Martin Weegmann, Edward J Khantzian.</b> Envelopments: immersion in and emergence from drug misuse.. <i>American journal of psychotherapy.</i> 2011//. 65:163                                                                                                                                                                                                                                                       | Level 1, Form Title/abstract screen |
| 521 | <b>Catherine J Segan, Ron Borland, Kay A Wilhelm, Sunil S Bhar, Ainslie T Hannan, David R Dunt, Ian T Ferretter.</b> Helping smokers with depression to quit smoking: collaborative care with Quitline.. <i>The Medical journal of Australia.</i> 2011//. 195:S7                                                                                                                                                       | Level 1, Form Title/abstract screen |
| 522 | <b>Frances J Kay-Lambkin, Amanda L Baker, Brian Kelly, Terry J Lewin.</b> Clinician-assisted computerised versus therapist-delivered treatment for depressive and addictive disorders: a randomised controlled trial.. <i>The Medical journal of Australia.</i> 2011//. 195:S44                                                                                                                                        | Level 2, Form Full Text Screening   |
| 523 | <b>Nancy M Petry, Jeremiah Weinstock, Sheila M Alessi.</b> A randomized trial of contingency management delivered in the context of group counseling.. <i>Journal</i>                                                                                                                                                                                                                                                  | Level 1, Form Title/abstract        |

|     |                                                                                                                                                                                                                                                                                                                                                                             |                                     |
|-----|-----------------------------------------------------------------------------------------------------------------------------------------------------------------------------------------------------------------------------------------------------------------------------------------------------------------------------------------------------------------------------|-------------------------------------|
|     | <i>of consulting and clinical psychology</i> . 2011//. 79:686                                                                                                                                                                                                                                                                                                               | screen                              |
| 524 | <b>Gabriela Novotna, Karen A Urbanoski, Brian R Rush</b> . Client-centered design of residential addiction and mental health care facilities: staff perceptions of their work environment.. <i>Qualitative health research</i> . 2011//. 21:1527                                                                                                                            | Level 2, Form Full Text Screening   |
| 525 | <b>Alison B Hamilton, Ines Poza, Donna L Washington</b> . "Homelessness and trauma go hand-in-hand": pathways to homelessness among women veterans.. <i>Women's health issues : official publication of the Jacobs Institute of Women's Health</i> . 2011//. 21:S203                                                                                                        | Level 1, Form Title/abstract screen |
| 526 | <b>Beth Thomas Hertz</b> . Combining quantity & quality. Adding new revenue streams can enable your practice to offer higher levels of service.. <i>Medical economics</i> . 2011//. 88:24                                                                                                                                                                                   | Level 1, Form Title/abstract screen |
| 527 | <b>Anna K McDowell, Timothy W Lineberry, J Michael Bostwick</b> . Practical suicide-risk management for the busy primary care physician.. <i>Mayo Clinic proceedings</i> . 2011//. 86:792                                                                                                                                                                                   | Level 1, Form Title/abstract screen |
| 528 | <b>Lynn E Sullivan, Jeanette M Tetrault, R Scott Braithwaite, Barbara J Turner, David A Fiellin</b> . A meta-analysis of the efficacy of nonphysician brief interventions for unhealthy alcohol use: implications for the patient-centered medical home.. <i>The American journal on addictions</i> . 2011//. 20:343                                                        | Level 1, Form Title/abstract screen |
| 529 | <b>William C Wadland, Vincent J WinklerPrins, Mary M Noel, Margaret E Thompson, Carlos F Rios-Bedoya</b> . Student performance on smoking cessation counseling with standardized patients.. <i>Family medicine</i> . 2011//. 43:422                                                                                                                                         | Level 1, Form Title/abstract screen |
| 530 | <b>Louise Stone</b> . Explaining the unexplainable - crafting explanatory frameworks for medically unexplained symptoms.. <i>Australian family physician</i> . 2011//. 40:440                                                                                                                                                                                               | Level 1, Form Title/abstract screen |
| 531 | <b>Lawrence Ward, Nima M Patel, Alexandra Hanlon, Shaden Eldakar-Hein, Kristin Sherlinski, Stephanie H Ward</b> . Prescription medication borrowing among adult patients at an urban medical center.. <i>Journal of urban health : bulletin of the New York Academy of Medicine</i> . 2011//. 88:997                                                                        | Level 1, Form Title/abstract screen |
| 532 | <b>Anirban Basu</b> . Economics of individualization in comparative effectiveness research and a basis for a patient-centered health care.. <i>Journal of health economics</i> . 2011//. 30:549                                                                                                                                                                             | Level 1, Form Title/abstract screen |
| 533 | <b>Geir Smedslund, Rigmor C Berg, Karianne T Hammerstrom, Asbjorn Steiro, Kari A Leiknes, Helene M Dahl, Kjetil Karlsen</b> . Motivational interviewing for substance abuse.. <i>The Cochrane database of systematic reviews</i> . 2011//. #volume#:CD008063                                                                                                                | Level 1, Form Title/abstract screen |
| 535 | <b>Robert Hoffmann, Virna Little</b> . Trans-disciplinary care: a new approach to improving the effectiveness of tobacco use interventions.. <i>Journal of health care for the poor and underserved</i> . 2011//. 22:409                                                                                                                                                    | Level 1, Form Title/abstract screen |
| 536 | <b>Klea D Bertakis, Rahman Azari</b> . Patient-centered care is associated with decreased health care utilization.. <i>Journal of the American Board of Family Medicine : JABFM</i> . 2011//. 24:229                                                                                                                                                                        | Level 1, Form Title/abstract screen |
| 537 | <b>Christina Nicolaidis</b> . Police officer, deal-maker, or health care provider? Moving to a patient-centered framework for chronic opioid management.. <i>Pain medicine (Malden, Mass.)</i> . 2011//. 12:890                                                                                                                                                             | Level 1, Form Title/abstract screen |
| 538 | <b>Courtney Valdez, Rachel Kimerling, Jenny K Hyun, Hanna F Mark, Meghan Saweikis, Joanne Pavao</b> . Veterans Health Administration mental health treatment settings of patients who report military sexual trauma.. <i>Journal of trauma &amp; dissociation : the official journal of the International Society for the Study of Dissociation (ISSD)</i> . 2011//. 12:232 | Level 1, Form Title/abstract screen |

|     |                                                                                                                                                                                                                                                                                                                                                                                                           |                                     |
|-----|-----------------------------------------------------------------------------------------------------------------------------------------------------------------------------------------------------------------------------------------------------------------------------------------------------------------------------------------------------------------------------------------------------------|-------------------------------------|
| 540 | <b>Rogério M Pinto, Aimee N C Campbell, Denise A Hien, Gary Yu, Prakash Gorroochurn.</b> Retention in the National Institute on Drug Abuse Clinical Trials Network Women and Trauma Study: implications for posttrial implementation.. <i>The American journal of orthopsychiatry</i> . 2011//. 81:211                                                                                                    | Level 2, Form Full Text Screening   |
| 541 | <b>Benjamin J Powers, Susanne Danus, Janet M Grubber, Maren K Olsen, Eugene Z Oddone, Hayden B Bosworth.</b> The effectiveness of personalized coronary heart disease and stroke risk communication.. <i>American heart journal</i> . 2011//. 161:673                                                                                                                                                     | Level 1, Form Title/abstract screen |
| 542 | <b>Manuela Garcia de la Hera, Maria Carmen Davo, Rosa Ballester-Anon, Jesus Vioque.</b> The opinions of injecting drug user (IDUs) HIV patients and health professionals on access to antiretroviral treatment and health services in Valencia, Spain.. <i>Evaluation &amp; the health professions</i> . 2011//. 34:349                                                                                   | Level 1, Form Title/abstract screen |
| 543 | <b>Daniel P Alford, Colleen T LaBelle, Natalie Kretsch, Alexis Bergeron, Michael Winter, Michael Botticelli, Jeffrey H Samet.</b> Collaborative care of opioid-addicted patients in primary care using buprenorphine: five-year experience.. <i>Archives of internal medicine</i> . 2011//. 171:425                                                                                                       | Level 1, Form Title/abstract screen |
| 544 | <b>Stephen R Shirk, Marc S Karver, Renee Brown.</b> The alliance in child and adolescent psychotherapy.. <i>Psychotherapy (Chicago, Ill.)</i> . 2011//. 48:17                                                                                                                                                                                                                                             | Level 1, Form Title/abstract screen |
| 545 | <b>Amy S B Bohnert, Kara Zivin, Deborah E Welsh, Amy M Kilbourne.</b> Ratings of patient-provider communication among veterans: serious mental illnesses, substance use disorders, and the moderating role of trust.. <i>Health communication</i> . 2011//. 26:267                                                                                                                                        | Level 1, Form Title/abstract screen |
| 546 | <b>Laura S Lorenz, Jon A Chilingerian.</b> Using visual and narrative methods to achieve fair process in clinical care.. <i>Journal of visualized experiments : JoVE</i> . 2011//. #volume#:#pages#                                                                                                                                                                                                       | Level 1, Form Title/abstract screen |
| 548 | <b>Deborah S Finnell, Jongwon Lee.</b> Psychometric properties of the decisional balance for patient choice in substance abuse treatment.. <i>Issues in mental health nursing</i> . 2011//. 32:243                                                                                                                                                                                                        | Level 1, Form Title/abstract screen |
| 549 | <b>David B Buller, Walter F Young, Erwin P Bettinghaus, Ron Borland, Joseph B Walther, Donald Helme, Peter A Andersen, Gary R Cutter, Julie A Maloy.</b> Continued benefits of a technical assistance web site to local tobacco control coalitions during a state budget shortfall.. <i>Journal of public health management and practice : JPHMP</i> . 2011//. 17:E10                                     | Level 1, Form Title/abstract screen |
| 550 | <b>Billie Bonevski, Christine Paul, Catherine D'Este, Robert Sanson-Fisher, Robert West, Afaf Girgis, Mohammad Siahpush, Robert Carter.</b> RCT of a client-centred, caseworker-delivered smoking cessation intervention for a socially disadvantaged population.. <i>BMC public health</i> . 2011//. 11:70                                                                                               | Level 1, Form Title/abstract screen |
| 551 | <b>Frances Kay-Lambkin, Amanda Baker, Terry Lewin, Vaughan Carr.</b> Acceptability of a clinician-assisted computerized psychological intervention for comorbid mental health and substance use problems: treatment adherence data from a randomized controlled trial.. <i>Journal of medical Internet research</i> . 2011//. 13:e11                                                                      | Level 2, Form Full Text Screening   |
| 552 | <b>Larry F Hamm, Bonnie K Sanderson, Philip A Ades, Kathy Berra, Leonard A Kaminsky, Jeffrey L Roitman, Mark A Williams.</b> Core competencies for cardiac rehabilitation/secondary prevention professionals: 2010 update: position statement of the American Association of Cardiovascular and Pulmonary Rehabilitation.. <i>Journal of cardiopulmonary rehabilitation and prevention</i> . 2011//. 31:2 | Level 1, Form Title/abstract screen |
| 553 | <b>Brenda Roman, Nicole Borges, Ann K Morrison.</b> Teaching motivational                                                                                                                                                                                                                                                                                                                                 | Level 1, Form                       |



|     |                                                                                                                                                                                                                                                                                                                                                                                                     |                                        |
|-----|-----------------------------------------------------------------------------------------------------------------------------------------------------------------------------------------------------------------------------------------------------------------------------------------------------------------------------------------------------------------------------------------------------|----------------------------------------|
|     | interviewing skills to third-year psychiatry clerkship students.. <i>Academic psychiatry : the journal of the American Association of Directors of Psychiatric Residency Training and the Association for Academic Psychiatry</i> . 2011//. 35:51                                                                                                                                                   | Title/abstract screen                  |
| 554 | <b>Susan V Eisen, Kathryn A Bottonari, Mark E Glickman, Avron 3rd Spiro, Mark R Schultz, Lawrence Herz, Robert Rosenheck, Ethan S Rofman.</b> The incremental value of self-reported mental health measures in predicting functional outcomes of veterans.. <i>The journal of behavioral health services &amp; research</i> . 2011//. 38:170                                                        | Level 1, Form<br>Title/abstract screen |
| 555 | <b>Theresa W Kim, Richard Saitz, Debbie M Cheng, Michael R Winter, Julie Witas, Jeffrey H Samet.</b> Initiation and engagement in chronic disease management care for substance dependence.. <i>Drug and alcohol dependence</i> . 2011//. 115:80                                                                                                                                                    | Level 1, Form<br>Title/abstract screen |
| 556 | <b>Benjamin J Morasco, Kathryn Corson, Dennis C Turk, Steven K Dobscha.</b> Association between substance use disorder status and pain-related function following 12 months of treatment in primary care patients with musculoskeletal pain.. <i>The journal of pain : official journal of the American Pain Society</i> . 2011//. 12:352                                                           | Level 1, Form<br>Title/abstract screen |
| 557 | <b>Klea D Bertakis, Rahman Azari.</b> Determinants and outcomes of patient-centered care.. <i>Patient education and counseling</i> . 2011//. 85:46                                                                                                                                                                                                                                                  | Level 1, Form<br>Title/abstract screen |
| 558 | <b>P Todd Korthuis, Somnath Saha, Geetanjali Chander, Dennis McCarty, Richard D Moore, Jonathan A Cohn, Victoria L Sharp, Mary Catherine Beach.</b> Substance use and the quality of patient-provider communication in HIV clinics.. <i>AIDS and behavior</i> . 2011//. 15:832                                                                                                                      | Level 1, Form<br>Title/abstract screen |
| 559 | <b>Robert E Booth, Barbara K Campbell, Susan K Mikulich-Gilbertson, Carrie J Tillotson, Dongseok Choi, James Robinson, Donald A Calsyn, Raul N Mandler, Lindsay M Jenkins, Laetitia L Thompson, Catherine L Dempsey, Michael R Liepman, Dennis McCarty.</b> Reducing HIV-related risk behaviors among injection drug users in residential detoxification.. <i>AIDS and behavior</i> . 2011//. 15:30 | Level 1, Form<br>Title/abstract screen |
| 560 | <b>John E Zeber, Alexander L Miller, Laurel A Copeland, John F McCarthy, Kara Zivin, Marcia Valenstein, Devra Greenwald, Amy M Kilbourne.</b> Medication adherence, ethnicity, and the influence of multiple psychosocial and financial barriers.. <i>Administration and policy in mental health</i> . 2011//. 38:86                                                                                | Level 1, Form<br>Title/abstract screen |
| 562 | <b>Nora D Volkow.</b> Toward individualized treatment for substance abuse.. <i>Addiction science &amp; clinical practice</i> . 2010//. 5:2                                                                                                                                                                                                                                                          | Level 1, Form<br>Title/abstract screen |
| 563 | <b>Frank Verloin DeGruy, Rebecca S Etz.</b> Attending to the whole person in the patient-centered medical home: the case for incorporating mental healthcare, substance abuse care, and health behavior change.. <i>Families, systems &amp; health : the journal of collaborative family healthcare</i> . 2010//. 28:298                                                                            | Level 1, Form<br>Title/abstract screen |
| 564 | <b>Gregory A Goldman, Robert J Gregory.</b> Relationships between techniques and outcomes for borderline personality disorder.. <i>American journal of psychotherapy</i> . 2010//. 64:359                                                                                                                                                                                                           | Level 1, Form<br>Title/abstract screen |
| 565 | <b>Christauria Welland, Neil Ribner.</b> Culturally specific treatment for partner-abusive Latino men: a qualitative study to identify and implement program components.. <i>Violence and victims</i> . 2010//. 25:799                                                                                                                                                                              | Level 1, Form<br>Title/abstract screen |
| 566 | <b>Francoise Ninane, Jean-Bernard Daeppen, Olivier Bugnon, Alain Pecoud.</b> [Integrated care: how to support a culture change?]. <i>Revue medicale suisse</i> . 2010//. 6:2302                                                                                                                                                                                                                     | Level 1, Form<br>Title/abstract screen |

|     |                                                                                                                                                                                                                                                                                                                    |                                           |
|-----|--------------------------------------------------------------------------------------------------------------------------------------------------------------------------------------------------------------------------------------------------------------------------------------------------------------------|-------------------------------------------|
| 567 | <b>Erica S N Tan, Mark A Yarhouse.</b> Facilitating congruence between religious beliefs and sexual identity with mindfulness.. <i>Psychotherapy (Chicago, Ill.)</i> . 2010//. 47:500                                                                                                                              | Level 1, Form<br>Title/abstract<br>screen |
| 568 | <b>Bernadette Lange.</b> The yoga mat as common ground: policy from a holistic perspective.. <i>Beginnings (American Holistic Nurses' Association)</i> . 2010//. 30:22                                                                                                                                             | Level 1, Form<br>Title/abstract<br>screen |
| 569 | <b>Fadia T Shaya, Xia Yan, Maryam Farshid, Samer Barakat, Miah Jung, Sara Low, Donald Fedder.</b> Social networks in cardiovascular disease management.. <i>Expert review of pharmacoeconomics &amp; outcomes research</i> . 2010//. 10:701                                                                        | Level 1, Form<br>Title/abstract<br>screen |
| 570 | <b>Amy M Kilbourne, Carrie Farmer Teh, Deborah Welsh, Harold Alan Pincus, Elaine Lasky, Brian Perron, Mark S Bauer.</b> Implementing composite quality metrics for bipolar disorder: towards a more comprehensive approach to quality measurement.. <i>General hospital psychiatry</i> . 2010//. 32:636            | Level 1, Form<br>Title/abstract<br>screen |
| 571 | <b>Diane E Boyer, Catherine Kane.</b> Program evaluation of a community crisis stabilization program.. <i>Archives of psychiatric nursing</i> . 2010//. 24:387                                                                                                                                                     | Level 1, Form<br>Title/abstract<br>screen |
| 572 | <b>Seddon Savage.</b> The patient-centered opioid treatment agreement.. <i>The American journal of bioethics : AJOB</i> . 2010//. 10:18                                                                                                                                                                            | Level 1, Form<br>Title/abstract<br>screen |
| 573 | <b>Benjamin G Druss, Barbara J Mauer.</b> Health care reform and care at the behavioral health--primary care interface.. <i>Psychiatric services (Washington, D.C.)</i> . 2010//. 61:1087                                                                                                                          | Level 1, Form<br>Title/abstract<br>screen |
| 574 | <b>Sara B McMenamin, Nicole M Bellows, Helen A Halpin, Diane R Rittenhouse, Lawrence P Casalino, Stephen M Shortell.</b> Adoption of policies to treat tobacco dependence in U.S. medical groups.. <i>American journal of preventive medicine</i> . 2010//. 39:449                                                 | Level 1, Form<br>Title/abstract<br>screen |
| 575 | <b>Astrid Birgden, Luke Grant.</b> Establishing a compulsory drug treatment prison: Therapeutic policy, principles, and practices in addressing offender rights and rehabilitation.. <i>International journal of law and psychiatry</i> . 2010//. 33:341                                                           | Level 1, Form<br>Title/abstract<br>screen |
| 576 | <b>Len Fromer, Thomas Barnes, Chris Garvey, Gabriel Ortiz, Dennis F Saver, Barbara Yawn.</b> Innovations to achieve excellence in COPD diagnosis and treatment in primary care.. <i>Postgraduate medicine</i> . 2010//. 122:150                                                                                    | Level 1, Form<br>Title/abstract<br>screen |
| 577 | <b>Molly Magill, Nadine R Mastroleo, Timothy R Apodaca, Nancy P Barnett, Suzanne M Colby, Peter M Monti.</b> Motivational interviewing with significant other participation: assessing therapeutic alliance and patient satisfaction and engagement.. <i>Journal of substance abuse treatment</i> . 2010//. 39:391 | Level 1, Form<br>Title/abstract<br>screen |
| 578 | <b>Elizabeth Loder.</b> The approach to the difficult patient.. <i>Handbook of clinical neurology</i> . 2010//. 97:233                                                                                                                                                                                             | Level 1, Form<br>Title/abstract<br>screen |
| 579 | <b>Darryl L Bassett.</b> Risk assessment and management in bipolar disorders.. <i>The Medical journal of Australia</i> . 2010//. 193:S21                                                                                                                                                                           | Level 1, Form<br>Title/abstract<br>screen |
| 580 | <b>Kara Zivin, Paul N Pfeiffer, Benjamin R Szymanski, Marcia Valenstein, Edward P Post, Erin M Miller, John F McCarthy.</b> Initiation of Primary Care-Mental Health Integration programs in the VA Health System: associations with psychiatric diagnoses in primary care.. <i>Medical care</i> . 2010//. 48:843  | Level 1, Form<br>Title/abstract<br>screen |
| 581 | <b>James Tew, Johanna Klaus, David W Oslin.</b> The Behavioral Health                                                                                                                                                                                                                                              | Level 1, Form                             |

|     |                                                                                                                                                                                                                                                                                     |                                     |
|-----|-------------------------------------------------------------------------------------------------------------------------------------------------------------------------------------------------------------------------------------------------------------------------------------|-------------------------------------|
|     | Laboratory: building a stronger foundation for the patient-centered medical home.. <i>Families, systems &amp; health : the journal of collaborative family healthcare</i> . 2010//. 28:130                                                                                          | Title/abstract screen               |
| 582 | <b>Brian P Kaskie, Kathleen C Buckwalter</b> . The collaborative model of mental health care for older Iowans.. <i>Research in gerontological nursing</i> . 2010//. 3:200                                                                                                           | Level 1, Form Title/abstract screen |
| 583 | <b>Eleanor T Lewis, Ann Combs, Jodie A Trafton</b> . Reasons for under-use of prescribed opioid medications by patients in pain.. <i>Pain medicine (Malden, Mass.)</i> . 2010//. 11:861                                                                                             | Level 1, Form Title/abstract screen |
| 584 | <b>Steven B Andrews, Tyler Drake, William Haslett, Rajesh Munusamy</b> . Developing web-based online support tools: the Dartmouth decision support software.. <i>Psychiatric rehabilitation journal</i> . 2010//. 34:37                                                             | Level 1, Form Title/abstract screen |
| 585 | <b>Samadhi Deva Campbell, Simon Justin Adamson, Janet Deborah Carter</b> . Client language during motivational enhancement therapy and alcohol use outcome.. <i>Behavioural and cognitive psychotherapy</i> . 2010//. 38:399                                                        | Level 1, Form Title/abstract screen |
| 586 | <b>Douglas L Polcin, Gantt P Galloway, Jason Bond, Rachael Korcha, Thomas K Greenfield</b> . How do residents of recovery houses experience confrontation between entry and 12-month follow-up?.. <i>Journal of psychoactive drugs</i> . 2010//. 42:49                              | Level 1, Form Title/abstract screen |
| 587 | <b>C Wallace</b> . Integrated assessment of older adults who misuse alcohol.. <i>Nursing standard (Royal College of Nursing (Great Britain) : 1987)</i> . 2010//. 24:51                                                                                                             | Level 1, Form Title/abstract screen |
| 588 | <b>Christine Barrowclough, Petra Meier, Ruth Beardmore, Richard Emsley</b> . Predicting therapeutic alliance in clients with psychosis and substance misuse.. <i>The Journal of nervous and mental disease</i> . 2010//. 198:373                                                    | Level 1, Form Title/abstract screen |
| 589 | <b>H M Seidling, S P W Schmitt, T Bruckner, J Kaltschmidt, M G Pruszydlo, C Senger, T Bertsche, I Walter-Sack, W E Haefeli</b> . Patient-specific electronic decision support reduces prescription of excessive doses.. <i>Quality &amp; safety in health care</i> . 2010//. 19:e15 | Level 1, Form Title/abstract screen |
| 590 | <b>Sonja Pasche, Bronwyn Myers, Mohamed Adam</b> . Factors associated with retention in alcohol and other drug treatment among disadvantaged communities in Cape Town, South Africa.. <i>Journal of studies on alcohol and drugs</i> . 2010//. 71:395                               | Level 1, Form Title/abstract screen |
| 591 | <b>Megan Petrie, Douglas Zatzick</b> . Collaborative care interventions in general trauma patients.. <i>Oral and maxillofacial surgery clinics of North America</i> . 2010//. 22:261                                                                                                | Level 1, Form Title/abstract screen |
| 592 | <b>Eunice C Wong, Grant N Marshall</b> . Barriers to the collaborative care of patients with orofacial injury.. <i>Oral and maxillofacial surgery clinics of North America</i> . 2010//. 22:247                                                                                     | Level 1, Form Title/abstract screen |
| 593 | <b>Vivek Shetty, Grant N Marshall</b> . Preface: collaborative care of the facial injury patient.. <i>Oral and maxillofacial surgery clinics of North America</i> . 2010//. 22:ix                                                                                                   | Level 1, Form Title/abstract screen |
| 594 | <b>Robert A Rosenheck, Michael S Neale, Somaia Mohamed</b> . Transition to low intensity case management in a VA Assertive Community Treatment model program.. <i>Psychiatric rehabilitation journal</i> . 2010//. 33:288                                                           | Level 1, Form Title/abstract screen |
| 595 | <b>Leanne Finney</b> . Nursing care for the patient with co-existing pain and substance misuse: meeting the patient's needs.. <i>Medsurg nursing : official journal of the Academy of Medical-Surgical Nurses</i> . 2010//. 19:25                                                   | Level 2, Form Full Text Screening   |

|     |                                                                                                                                                                                                                                                                                                                                 |                                     |
|-----|---------------------------------------------------------------------------------------------------------------------------------------------------------------------------------------------------------------------------------------------------------------------------------------------------------------------------------|-------------------------------------|
| 596 | <b>Laura M Garnier, Amelia M Arria, Kimberly M Caldeira, Kathryn B Vincent, Kevin E O'Grady, Eric D Wish.</b> Sharing and selling of prescription medications in a college student sample.. <i>The Journal of clinical psychiatry</i> . 2010//. 71:262                                                                          | Level 1, Form Title/abstract screen |
| 597 | <b>Kathleen R Delaney.</b> Recovery paradigm: confession of the unenlightened.. <i>Archives of psychiatric nursing</i> . 2010//. 24:137                                                                                                                                                                                         | Level 1, Form Title/abstract screen |
| 598 | <b>Bronwyn J Myers, Sonja Pasche, Mohamed Adam.</b> Correlates of substance abuse treatment completion among disadvantaged communities in Cape Town, South Africa.. <i>Substance abuse treatment, prevention, and policy</i> . 2010//. 5:3                                                                                      | Level 1, Form Title/abstract screen |
| 599 | <b>Vivek Shetty, Larissa J Mooney, Corwin M Zigler, Thomas R Belin, Debra Murphy, Richard Rawson.</b> The relationship between methamphetamine use and increased dental disease.. <i>Journal of the American Dental Association (1939)</i> . 2010//. 141:307                                                                    | Level 1, Form Title/abstract screen |
| 600 | <b>Kent E Hutchison.</b> Substance use disorders: realizing the promise of pharmacogenomics and personalized medicine.. <i>Annual review of clinical psychology</i> . 2010//. 6:577                                                                                                                                             | Level 1, Form Title/abstract screen |
| 601 | <b>Erdmann Fahndrich, Ingrid Munk.</b> [Absconding of a patient from an acute psychiatric ward. Whom do the courts hold liable?]. <i>Psychiatrische Praxis</i> . 2010//. 37:89                                                                                                                                                  | Level 1, Form Title/abstract screen |
| 602 | <b>Susan Swartz Woods, Carlos Roberto Jaen.</b> Increasing consumer demand for tobacco treatments: Ten design recommendations for clinicians and healthcare systems.. <i>American journal of preventive medicine</i> . 2010//. 38:S385                                                                                          | Level 2, Form Full Text Screening   |
| 603 | <b>William Fals-Stewart, Wendy K K Lam.</b> Computer-assisted cognitive rehabilitation for the treatment of patients with substance use disorders: a randomized clinical trial.. <i>Experimental and clinical psychopharmacology</i> . 2010//. 18:87                                                                            | Level 1, Form Title/abstract screen |
| 604 | <b>Nancy M Petry, Sheila M Alessi, David M Ledgerwood, Sean Sierra.</b> Psychometric properties of the contingency management competence scale.. <i>Drug and alcohol dependence</i> . 2010//. 109:167                                                                                                                           | Level 1, Form Title/abstract screen |
| 605 | <b>Steven D Vannoy, Patricia Arean, Jurgen Unutzer.</b> Advantages of using estimated depression-free days for evaluating treatment efficacy.. <i>Psychiatric services (Washington, D.C.)</i> . 2010//. 61:160                                                                                                                  | Level 1, Form Title/abstract screen |
| 606 | <b>Paul Crits-Christoph, Sarah Ring-Kurtz, Bridget McClure, Christina Temes, Agatha Kulaga, Robert Gallop, Robert Forman, John Rotrosen.</b> A randomized controlled study of a web-based performance improvement system for substance abuse treatment providers.. <i>Journal of substance abuse treatment</i> . 2010//. 38:251 | Level 1, Form Title/abstract screen |
| 607 | <b>T Nordfjaern, T Rundmo, R Hole.</b> Treatment and recovery as perceived by patients with substance addiction.. <i>Journal of psychiatric and mental health nursing</i> . 2010//. 17:46                                                                                                                                       | Level 2, Form Full Text Screening   |
| 608 | <b>S Lampen-Imkamp, U Blanke, W Dillo.</b> ["Help Conference", a new social assistance for integration according to 53 SGB XII--a two-year analysis].. <i>Gesundheitswesen (Bundesverband der Arzte des Offentlichen Gesundheitsdienstes (Germany))</i> . 2010//. 72:763                                                        | Level 1, Form Title/abstract screen |
| 609 | <b>Doug Sellman.</b> The 10 most important things known about addiction.. <i>Addiction (Abingdon, England)</i> . 2010//. 105:6                                                                                                                                                                                                  | Level 1, Form Title/abstract screen |
| 610 | <b>Miguel E Gallardo, Shannon J Curry.</b> Shifting perspectives: culturally                                                                                                                                                                                                                                                    | Level 2, Form                       |

|     |                                                                                                                                                                                                                                                                                                                                                           |                                     |
|-----|-----------------------------------------------------------------------------------------------------------------------------------------------------------------------------------------------------------------------------------------------------------------------------------------------------------------------------------------------------------|-------------------------------------|
|     | responsive interventions with latino substance abusers.. <i>Journal of ethnicity in substance abuse</i> . 2009//. 8:314                                                                                                                                                                                                                                   | Full Text Screening                 |
| 611 | <b>William B Jaffee, Genie L Bailey, Michelle Lohman, Paula Riggs, Leah McDonald, Roger D Weiss.</b> Methods of recruiting adolescents with psychiatric and substance use disorders for a clinical trial.. <i>The American journal of drug and alcohol abuse</i> . 2009//. 35:381                                                                         | Level 1, Form Title/abstract screen |
| 612 | <b>Rebekka S Palmer, Mary K Murphy, Alessandro Piselli, Samuel A Ball.</b> Substance user treatment dropout from client and clinician perspectives: a pilot study.. <i>Substance use &amp; misuse</i> . 2009//. 44:1021                                                                                                                                   | Level 1, Form Title/abstract screen |
| 613 | <b>Brian E Perron, Matthew O Howard, Jenna K Nienhuis, Mark S Bauer, Amanda Toler Woodward, Amy M Kilbourne.</b> Prevalence and burden of general medical conditions among adults with bipolar I disorder: results from the National Epidemiologic Survey on Alcohol and Related Conditions.. <i>The Journal of clinical psychiatry</i> . 2009//. 70:1407 | Level 1, Form Title/abstract screen |
| 614 | <b>Vani Nath Simmons, Erika B Litvin, Riddhi D Patel, Paul B Jacobsen, Judith C McCaffrey, Gerold Bepler, Gwendolyn P Quinn, Thomas H Brandon.</b> Patient-provider communication and perspectives on smoking cessation and relapse in the oncology setting.. <i>Patient education and counseling</i> . 2009//. 77:398                                    | Level 1, Form Title/abstract screen |
| 615 | <b>Douglas Gourlay, Howard A Heit.</b> Commentary.. <i>Clinical chemistry</i> . 2009//. 55:1769                                                                                                                                                                                                                                                           | Level 1, Form Title/abstract screen |
| 616 | <b>Richard M Bergenstal, Nick Freemantle, Malgorzata Leyk, Gordon B Jr Cutler, Risa P Hayes, Douglas B Muchmore.</b> Does availability of AIR insulin increase insulin use and improve glycemic control in patients with type 2 diabetes?.. <i>Diabetes technology &amp; therapeutics</i> . 2009//. 11 Suppl 2:S45                                        | Level 1, Form Title/abstract screen |
| 617 | <b>Roger Nuttall.</b> Holistic care of a drug-related wound: a case study from a clinic for homeless people.. <i>Nursing times</i> . 2009//. 105:18                                                                                                                                                                                                       | Level 1, Form Title/abstract screen |
| 618 | <b>Joseph P Gone.</b> A community-based treatment for Native American historical trauma: prospects for evidence-based practice.. <i>Journal of consulting and clinical psychology</i> . 2009//. 77:751                                                                                                                                                    | Level 1, Form Title/abstract screen |
| 619 | <b>Carolyn Coulson, Felicity Ng, Marjan Geertsema, Seetal Dodd, Michael Berk.</b> Client-reported reasons for non-engagement in drug and alcohol treatment.. <i>Drug and alcohol review</i> . 2009//. 28:372                                                                                                                                              | Level 1, Form Title/abstract screen |
| 621 | <b>Christine M J Snyder, Stephen A Anderson.</b> An examination of mandated versus voluntary referral as a determinant of clinical outcome.. <i>Journal of marital and family therapy</i> . 2009//. 35:278                                                                                                                                                | Level 1, Form Title/abstract screen |
| 623 | <b>Carina Marquez, Samuel J Mitchell, C Bradley Hare, Malcolm John, Jeffrey D Klausner.</b> Methamphetamine use, sexual activity, patient-provider communication, and medication adherence among HIV-infected patients in care, San Francisco 2004-2006.. <i>AIDS care</i> . 2009//. 21:575                                                               | Level 1, Form Title/abstract screen |
| 624 | <b>Timothy R Apodaca, Richard Longabaugh.</b> Mechanisms of change in motivational interviewing: a review and preliminary evaluation of the evidence.. <i>Addiction (Abingdon, England)</i> . 2009//. 104:705                                                                                                                                             | Level 1, Form Title/abstract screen |
| 625 | <b>Peter G Miller, William R Miller.</b> What should we be aiming for in the treatment of addiction?.. <i>Addiction (Abingdon, England)</i> . 2009//. 104:685                                                                                                                                                                                             | Level 1, Form Title/abstract screen |
| 627 | <b>Pierre Thomas, Koksai Alptekin, Mihai Gheorghe, Mauro Mauri, Jose</b>                                                                                                                                                                                                                                                                                  | Level 1, Form                       |

|     |                                                                                                                                                                                                                                                                                                                                                                                                                |                                     |
|-----|----------------------------------------------------------------------------------------------------------------------------------------------------------------------------------------------------------------------------------------------------------------------------------------------------------------------------------------------------------------------------------------------------------------|-------------------------------------|
|     | <b>Manuel Olivares, Michael Riedel.</b> Management of patients presenting with acute psychotic episodes of schizophrenia.. <i>CNS drugs</i> . 2009//. 23:193                                                                                                                                                                                                                                                   | Title/abstract screen               |
| 628 | <b>Kristin Ross.</b> Clients best served through collaborative practice.. <i>Nursing BC</i> . 2009//. 41:6                                                                                                                                                                                                                                                                                                     | Level 1, Form Title/abstract screen |
| 629 | <b>James J Clark.</b> Contemporary psychotherapy research: implications for substance misuse treatment and research.. <i>Substance use &amp; misuse</i> . 2009//. 44:42                                                                                                                                                                                                                                        | Level 1, Form Title/abstract screen |
| 630 | <b>Douglas C Smith, James A Hall, Mijin Jang, Stephan Arndt.</b> Therapist adherence to a motivational-interviewing intervention improves treatment entry for substance-misusing adolescents with low problem perception.. <i>Journal of studies on alcohol and drugs</i> . 2009//. 70:101                                                                                                                     | Level 1, Form Title/abstract screen |
| 631 | <b>Anonymous.</b> From the editors.. <i>Cambridge quarterly of healthcare ethics : CQ : the international journal of healthcare ethics committees</i> . 2009//. 18:4                                                                                                                                                                                                                                           | Level 1, Form Title/abstract screen |
| 632 | <b>Carol T Mowbray, Amanda Toler Woodward, Mark C Holter, Peter MacFarlane, Deborah Bybee.</b> Characteristics of users of consumer-run drop-in centers versus clubhouses.. <i>The journal of behavioral health services &amp; research</i> . 2009//. 36:361                                                                                                                                                   | Level 1, Form Title/abstract screen |
| 633 | <b>Dennis McCarty, David Gustafson, Victor A Capoccia, Frances Cotter.</b> Improving care for the treatment of alcohol and drug disorders.. <i>The journal of behavioral health services &amp; research</i> . 2009//. 36:52                                                                                                                                                                                    | Level 2, Form Full Text Screening   |
| 634 | <b>Anita Kihlstrom, Ewa Wikstrom.</b> Towards network and citizen: collaborative care for drug abusers.. <i>The International journal of health planning and management</i> . 2009//. 24:233                                                                                                                                                                                                                   | Level 1, Form Title/abstract screen |
| 635 | <b>Shailesh Kumar, Darren Malone.</b> Panic disorder.. <i>BMJ clinical evidence</i> . 2008//. 2008:#pages#                                                                                                                                                                                                                                                                                                     | Level 1, Form Title/abstract screen |
| 636 | <b>Stephanie S Covington, Cynthia Burke, Sandy Keaton, Candice Norcott.</b> Evaluation of a trauma-informed and gender-responsive intervention for women in drug treatment.. <i>Journal of psychoactive drugs</i> . 2008//. Suppl 5:387                                                                                                                                                                        | Level 2, Form Full Text Screening   |
| 638 | <b>Clive G Long, Barbara Fulton, Clive R Hollin.</b> The development of a 'best practice' service for women in a medium-secure psychiatric setting: treatment components and evaluation.. <i>Clinical psychology &amp; psychotherapy</i> . 2008//. 15:304                                                                                                                                                      | Level 1, Form Title/abstract screen |
| 639 | <b>Linda M Chatters, Kai McKeever Bullard, Robert Joseph Taylor, Amanda Toler Woodward, Harold W Neighbors, James S Jackson.</b> Religious participation and DSM-IV disorders among older African Americans: findings from the National Survey of American Life.. <i>The American journal of geriatric psychiatry : official journal of the American Association for Geriatric Psychiatry</i> . 2008//. 16:957 | Level 1, Form Title/abstract screen |
| 640 | <b>J Christopher Perry, J Christopher Fowler, Ann Greif Howe.</b> Subject and interviewer determinants of the adequacy of the dynamic interview.. <i>The Journal of nervous and mental disease</i> . 2008//. 196:612                                                                                                                                                                                           | Level 1, Form Title/abstract screen |
| 641 | <b>P Preston Reynolds.</b> Title VII innovations in American medical and dental education: responding to 21st century priorities for the health of the American public.. <i>Academic medicine : journal of the Association of American Medical Colleges</i> . 2008//. 83:1015                                                                                                                                  | Level 1, Form Title/abstract screen |
| 642 | <b>Karni Shelef, Gary M Diamond.</b> Short form of the revised Vanderbilt                                                                                                                                                                                                                                                                                                                                      | Level 1, Form                       |

|     |                                                                                                                                                                                                                                                                                                                                                     |                                        |
|-----|-----------------------------------------------------------------------------------------------------------------------------------------------------------------------------------------------------------------------------------------------------------------------------------------------------------------------------------------------------|----------------------------------------|
|     | therapeutic alliance scale: development, reliability, and validity.. <i>Psychotherapy research : journal of the Society for Psychotherapy Research</i> . 2008//. 18:433                                                                                                                                                                             | Title/abstract screen                  |
| 643 | <b>Carole Fernandez, Denise Wilson</b> . Maori women's views on smoking cessation initiatives.. <i>Nursing praxis in New Zealand inc</i> . 2008//. 24:27                                                                                                                                                                                            | Level 1, Form<br>Title/abstract screen |
| 644 | <b>Stephen D Cassivi, Mark S Allen, Gregg D Vanderwaardt, Lori L Ewoldt, Mary E Cordes, Dennis A Wigle, Francis C Nichols, Peter C Pairolero, Claude Deschamps</b> . Patient-centered quality indicators for pulmonary resection.. <i>The Annals of thoracic surgery</i> . 2008//. 86:927                                                           | Level 1, Form<br>Title/abstract screen |
| 645 | <b>Nicholas Steel, Max Bachmann, Susan Maisey, Paul Shekelle, Elizabeth Breeze, Michael Marmot, David Melzer</b> . Self reported receipt of care consistent with 32 quality indicators: national population survey of adults aged 50 or more in England.. <i>BMJ (Clinical research ed.)</i> . 2008//. 337:a957                                     | Level 1, Form<br>Title/abstract screen |
| 646 | <b>Amy L Marr, Tyson Pillow, Stephen Brown</b> . Southside medical homes network: linking emergency department patients to community care.. <i>Prehospital and disaster medicine</i> . 2008//. 23:282                                                                                                                                               | Level 1, Form<br>Title/abstract screen |
| 647 | <b>Hakan Odeberg, Bruce Rodriguez-Silva, Pirjo Salander, Bjorn Martensson</b> . Individualized continuation electroconvulsive therapy and medication as a bridge to relapse prevention after an index course of electroconvulsive therapy in severe mood disorders: a naturalistic 3-year cohort study.. <i>The journal of ECT</i> . 2008//. 24:183 | Level 1, Form<br>Title/abstract screen |
| 648 | <b>Aaron Hogue, Craig E Henderson, Sarah Dauber, Priscilla C Barajas, Adam Fried, Howard A Liddle</b> . Treatment adherence, competence, and outcome in individual and family therapy for adolescent behavior problems.. <i>Journal of consulting and clinical psychology</i> . 2008//. 76:544                                                      | Level 1, Form<br>Title/abstract screen |
| 649 | <b>Judy C Chang, Diane Dado, Richard M Frankel, Keri L Rodriguez, Susan Zickmund, Bruce S Ling, Robert M Arnold</b> . When pregnant patients disclose substance use: missed opportunities for behavioral change counseling.. <i>Patient education and counseling</i> . 2008//. 72:394                                                               | Level 1, Form<br>Title/abstract screen |
| 650 | <b>Simon J Adamson, J Douglas Sellman</b> . Five-year outcomes of alcohol-dependent persons treated with motivational enhancement.. <i>Journal of studies on alcohol and drugs</i> . 2008//. 69:589                                                                                                                                                 | Level 1, Form<br>Title/abstract screen |
| 651 | <b>Holly Blake</b> . Innovation in practice: mobile phone technology in patient care.. <i>British journal of community nursing</i> . 2008//. 13:160                                                                                                                                                                                                 | Level 1, Form<br>Title/abstract screen |
| 652 | <b>Steven K Dobscha, Kathryn Corson, Ruth Q Leibowitz, Mark D Sullivan, Martha S Gerrity</b> . Rationale, design, and baseline findings from a randomized trial of collaborative care for chronic musculoskeletal pain in primary care.. <i>Pain medicine (Malden, Mass.)</i> . 2008//. 9:1050                                                      | Level 1, Form<br>Title/abstract screen |
| 653 | <b>Sean J Tollison, Christine M Lee, Clayton Neighbors, Teryl A Neil, Nichole D Olson, Mary E Larimer</b> . Questions and reflections: the use of motivational interviewing microskills in a peer-led brief alcohol intervention for college students.. <i>Behavior therapy</i> . 2008//. 39:183                                                    | Level 1, Form<br>Title/abstract screen |
| 654 | <b>Zoe Slote Morris, Maria Gannon</b> . Drug misuse treatment services in Scotland: predicting outcomes.. <i>International journal for quality in health care : journal of the International Society for Quality in Health Care</i> . 2008//. 20:271                                                                                                | Level 1, Form<br>Title/abstract screen |
| 655 | <b>Kimberly Horn, Geri Dino, Candice Hamilton, N Noerachmanto, Jianjun Zhang</b> . Feasibility of a smoking cessation intervention for teens in the emergency department: reach, implementation fidelity, and acceptability..                                                                                                                       | Level 1, Form<br>Title/abstract screen |

|     |                                                                                                                                                                                                                                                                                                                                                                                                         |                                           |
|-----|---------------------------------------------------------------------------------------------------------------------------------------------------------------------------------------------------------------------------------------------------------------------------------------------------------------------------------------------------------------------------------------------------------|-------------------------------------------|
|     | <i>American journal of critical care : an official publication, American Association of Critical-Care Nurses. 2008//. 17:205</i>                                                                                                                                                                                                                                                                        |                                           |
| 657 | <b>Michael L Dennis, Melissa L Ives, Michelle K White, Randolph D Muck.</b> The Strengthening Communities for Youth (SCY) initiative: a cluster analysis of the services received, their correlates and how they are associated with outcomes.. <i>Journal of psychoactive drugs. 2008//. 40:3</i>                                                                                                      | Level 1, Form<br>Title/abstract<br>screen |
| 658 | <b>Robert M Bossarte, Ernest E 3rd Sullivent, Julie Sinclair, Danae Bixler, Thomas R Simon, Monica H Swahn, Kristin Wilson.</b> Injury, violence, and risk among participants in a mass gathering of the Rainbow Family of Living Light.. <i>Journal of health care for the poor and underserved. 2008//. 19:588</i>                                                                                    | Level 1, Form<br>Title/abstract<br>screen |
| 659 | <b>Jose Capece.</b> [Rethinking addictions: the cognitive paradigm and substance dependence disorder].. <i>Vertex (Buenos Aires, Argentina). 2008//. 19:527</i>                                                                                                                                                                                                                                         | Level 1, Form<br>Title/abstract<br>screen |
| 660 | <b>Michael G Rank, Iris Chaffin, Charles R Figley, Tiffany Lawrence.</b> The treatment of posttraumatic stress disorder in an extended care psychiatric rehabilitation program.. <i>Work (Reading, Mass.). 2008//. 30:113</i>                                                                                                                                                                           | Level 1, Form<br>Title/abstract<br>screen |
| 661 | <b>David Forbes, Ruth Parslow, Mark Creamer, Nicholas Allen, Tony McHugh, Mal Hopwood.</b> Mechanisms of anger and treatment outcome in combat veterans with posttraumatic stress disorder.. <i>Journal of traumatic stress. 2008//. 21:142</i>                                                                                                                                                         | Level 1, Form<br>Title/abstract<br>screen |
| 663 | <b>Teresa J Hudson, Richard R Owen, Carol R Thrush, Tracey L Armitage, Purushottam Thapa.</b> Guideline implementation and patient-tailoring strategies to improve medication adherence for schizophrenia.. <i>The Journal of clinical psychiatry. 2008//. 69:74</i>                                                                                                                                    | Level 1, Form<br>Title/abstract<br>screen |
| 664 | <b>Jane Scullion.</b> Patient-focused outcomes in chronic obstructive pulmonary disease.. <i>Nursing standard (Royal College of Nursing (Great Britain) : 1987). 2008//. 22:50</i>                                                                                                                                                                                                                      | Level 1, Form<br>Title/abstract<br>screen |
| 665 | <b>Richard A Grucza, Thomas R Przybeck, C Robert Cloninger.</b> Screening for alcohol problems: an epidemiological perspective and implications for primary care.. <i>Missouri medicine. 2008//. 105:67</i>                                                                                                                                                                                             | Level 1, Form<br>Title/abstract<br>screen |
| 666 | <b>Donna J Keyser, Jeanie Knox Houtsinger, Katherine Watkins, Harold Alan Pincus.</b> Applying the institute of medicine quality chasm framework to improving health care for mental and substance use conditions.. <i>The Psychiatric clinics of North America. 2008//. 31:43</i>                                                                                                                      | Level 1, Form<br>Title/abstract<br>screen |
| 667 | <b>Sharon M Flicker, Charles W Turner, Holly B Waldron, Janet L Brody, Timothy J Ozechowski.</b> Ethnic background, therapeutic alliance, and treatment retention in functional family therapy with adolescents who abuse substances.. <i>Journal of family psychology : JFP : journal of the Division of Family Psychology of the American Psychological Association (Division 43). 2008//. 22:167</i> | Level 2, Form<br>Full Text<br>Screening   |
| 668 | <b>Barbara Lopez, Seth J Schwartz, Guillermo Prado, Ana E Campo, Hilda Pantin.</b> Adolescent neurological development and its implications for adolescent substance use prevention.. <i>The journal of primary prevention. 2008//. 29:5</i>                                                                                                                                                            | Level 1, Form<br>Title/abstract<br>screen |
| 669 | <b>Gillian M Craig, Helen Booth, Jo Hall, Alistair Story, Andrew Hayward, Ann Goodburn, Alimuddin Zumla.</b> Establishing a new service role in tuberculosis care: the tuberculosis link worker.. <i>Journal of advanced nursing. 2008//. 61:413</i>                                                                                                                                                    | Level 1, Form<br>Title/abstract<br>screen |
| 670 | <b>Aaron Hogue, Sarah Dauber, Priscilla Chinchilla, Adam Fried, Craig</b>                                                                                                                                                                                                                                                                                                                               | Level 1, Form                             |



|     |                                                                                                                                                                                                                                                                                                                                                                                                        |                                     |
|-----|--------------------------------------------------------------------------------------------------------------------------------------------------------------------------------------------------------------------------------------------------------------------------------------------------------------------------------------------------------------------------------------------------------|-------------------------------------|
|     | <b>Henderson, Jaime Inclan, Robert H Reiner, Howard A Liddle.</b> Assessing fidelity in individual and family therapy for adolescent substance abuse.. <i>Journal of substance abuse treatment.</i> 2008//. 35:137                                                                                                                                                                                     | Title/abstract screen               |
| 671 | <b>S Keshavjee, I Y Gelmanova, A D Pasechnikov, S P Mishustin, Y G Andreev, A Yedilbayev, J J Furin, J S Mukherjee, M L Rich, E A Nardell, P E Farmer, J Y Kim, S S Shin.</b> Treating multidrug-resistant tuberculosis in Tomsk, Russia: developing programs that address the linkage between poverty and disease.. <i>Annals of the New York Academy of Sciences.</i> 2008//. 1136:1                 | Level 1, Form Title/abstract screen |
| 673 | <b>Daniel H Angres, Ailsa K Nielsen.</b> The role of the TCI-R (Temperament Character Inventory) in individualized treatment planning in a population of addicted professionals.. <i>Journal of addictive diseases.</i> 2007//. 26 Suppl 1:51                                                                                                                                                          | Level 1, Form Title/abstract screen |
| 674 | <b>Rachel Gonzales, David C Perlman.</b> Response: a case for collaborative care.. <i>Addiction science &amp; clinical practice.</i> 2007//. 4:43                                                                                                                                                                                                                                                      | Level 1, Form Title/abstract screen |
| 675 | <b>Jennifer M Strickland, Angela Huskey, David B Brushwood.</b> Pharmacist-physician collaboration in pain management practice.. <i>Journal of opioid management.</i> 2007//. 3:295                                                                                                                                                                                                                    | Level 1, Form Title/abstract screen |
| 676 | <b>Laura Weiss Roberts, Mark E Johnson, Christiane Brems, Teddy D Warner.</b> Ethical disparities: challenges encountered by multidisciplinary providers in fulfilling ethical standards in the care of rural and minority people.. <i>The Journal of rural health : official journal of the American Rural Health Association and the National Rural Health Care Association.</i> 2007//. 23 Suppl:89 | Level 1, Form Title/abstract screen |
| 677 | <b>Thomas F Kresina.</b> Medication assisted treatment of drug abuse and dependence: global availability and utilization.. <i>Recent patents on anti-infective drug discovery.</i> 2007//. 2:79                                                                                                                                                                                                        | Level 1, Form Title/abstract screen |
| 678 | <b>Louis-Georges Cournoyer, Serge Brochu, Michel Landry, Jacques Bergeron.</b> Therapeutic alliance, patient behaviour and dropout in a drug rehabilitation programme: the moderating effect of clinical subpopulations.. <i>Addiction (Abingdon, England).</i> 2007//. 102:1960                                                                                                                       | Level 1, Form Title/abstract screen |
| 679 | <b>Ronald W Manderscheid.</b> A room in the medical home. Consumers deserve "first-floor" access to mental and substance use care in collaborative care systems.. <i>Behavioral healthcare.</i> 2007//. 27:45                                                                                                                                                                                          | Level 1, Form Title/abstract screen |
| 680 | <b>Betty D Morgan, Anne P Rossi.</b> Difficult-to-manage HIV/AIDS clients with psychiatric illness and substance abuse problems: a collaborative practice with psychiatric advanced practice nurses.. <i>The Journal of the Association of Nurses in AIDS Care : JANAC.</i> 2007//. 18:77                                                                                                              | Level 1, Form Title/abstract screen |
| 681 | <b>Mayur M Desai, Robert A Rosenheck, Rani A Desai.</b> Prevalence and correlates of human immunodeficiency virus testing and posttest counseling among outpatients with serious mental illness.. <i>The Journal of nervous and mental disease.</i> 2007//. 195:776                                                                                                                                    | Level 1, Form Title/abstract screen |
| 682 | <b>Maureen Fitzgerald, Jay Ford.</b> Helping states and providers work together.. <i>Behavioral healthcare.</i> 2007//. 27:14                                                                                                                                                                                                                                                                          | Level 1, Form Title/abstract screen |
| 683 | <b>Ian B Hickie, Andrea S Fogarty, Tracey A Davenport, Georgina M Luscombe, Jane Burns.</b> Responding to experiences of young people with common mental health problems attending Australian general practice.. <i>The Medical journal of Australia.</i> 2007//. 187:S47                                                                                                                              | Level 1, Form Title/abstract screen |
| 684 | <b>Greer Sullivan, Michelle G Craske, Cathy Sherbourne, Mark J Edlund,</b>                                                                                                                                                                                                                                                                                                                             | Level 1, Form                       |

|     |                                                                                                                                                                                                                                                                                                                                                                                                                                                                  |                                     |
|-----|------------------------------------------------------------------------------------------------------------------------------------------------------------------------------------------------------------------------------------------------------------------------------------------------------------------------------------------------------------------------------------------------------------------------------------------------------------------|-------------------------------------|
|     | <b>Raphael D Rose, Daniela Golinelli, Denise A Chavira, Alexander Bystritsky, Murray B Stein, Peter P Roy-Byrne.</b> Design of the Coordinated Anxiety Learning and Management (CALM) study: innovations in collaborative care for anxiety disorders.. <i>General hospital psychiatry</i> . 2007//. 29:379                                                                                                                                                       | Title/abstract screen               |
| 685 | <b>Mitchell P Karno.</b> A case study of mediators of treatment effectiveness.. <i>Alcoholism, clinical and experimental research</i> . 2007//. 31:33s                                                                                                                                                                                                                                                                                                           | Level 1, Form Title/abstract screen |
| 686 | <b>Kahryn Hughes.</b> Migrating identities: the relational constitution of drug use and addiction.. <i>Sociology of health &amp; illness</i> . 2007//. 29:673                                                                                                                                                                                                                                                                                                    | Level 1, Form Title/abstract screen |
| 687 | <b>Meaghan Nelson, Heidi E Hamilton.</b> Improving in-office discussion of chronic obstructive pulmonary disease: results and recommendations from an in-office linguistic study in chronic obstructive pulmonary disease.. <i>The American journal of medicine</i> . 2007//. 120:S28                                                                                                                                                                            | Level 1, Form Title/abstract screen |
| 688 | <b>Jon Morgenstern, James R McKay.</b> Rethinking the paradigms that inform behavioral treatment research for substance use disorders.. <i>Addiction (Abingdon, England)</i> . 2007//. 102:1377                                                                                                                                                                                                                                                                  | Level 1, Form Title/abstract screen |
| 689 | <b>Marcia Andersen, Elaine Hockman, Geoffrey Smereck, Jannie Tinsley, Dollie Milfort, Robert Wilcox, Teresa Smith, Christopher Connelly, Latonia Adams, Richard Thomas.</b> Retaining women in HIV medical care.. <i>The Journal of the Association of Nurses in AIDS Care : JANAC</i> . 2007//. 18:33                                                                                                                                                           | Level 1, Form Title/abstract screen |
| 690 | <b>Samuel A Ball.</b> Comparing individual therapies for personality disordered opioid dependent patients.. <i>Journal of personality disorders</i> . 2007//. 21:305                                                                                                                                                                                                                                                                                             | Level 1, Form Title/abstract screen |
| 691 | <b>Robert Forman, Paul Crits-Christoph, Ovgu Kaynak, Matt Worley, Donald A Hantula, Agatha Kulaga, John Rotrosen, Melissa Chu, Robert Gallop, Jennifer Potter, Patrice Muchowski, Kirk Brower, Stephen Strobbe, Kathy Magruder, A'Delle H Chellis, Tad Clodfelter, Margaret Cawley.</b> A feasibility study of a web-based performance improvement system for substance abuse treatment providers.. <i>Journal of substance abuse treatment</i> . 2007//. 33:363 | Level 1, Form Title/abstract screen |
| 692 | <b>John C Fortney, Jeffrey M Pyne, Mark J Edlund, David K Williams, Dean E Robinson, Dinesh Mittal, Kathy L Henderson.</b> A randomized trial of telemedicine-based collaborative care for depression.. <i>Journal of general internal medicine</i> . 2007//. 22:1086                                                                                                                                                                                            | Level 1, Form Title/abstract screen |
| 693 | <b>Kieran J Moriarty, Helen Platt, Sandra Crompton, Wendy Darling, Martin Blakemore, Sue Hutchinson, David Proctor, Malcolm Brown, Burt Burtun, George Lipscomb, Kadukkavil Padmakumar.</b> Collaborative care for alcohol-related liver disease.. <i>Clinical medicine (London, England)</i> . 2007//. 7:125                                                                                                                                                    | Level 1, Form Title/abstract screen |
| 694 | <b>John D Corrigan, Jennifer Bogner.</b> Interventions to promote retention in substance abuse treatment.. <i>Brain injury</i> . 2007//. 21:343                                                                                                                                                                                                                                                                                                                  | Level 2, Form Full Text Screening   |
| 695 | <b>Norma G Bartholomew, George W Joe, Grace A Rowan-Szal, D Dwayne Simpson.</b> Counselor assessments of training and adoption barriers.. <i>Journal of substance abuse treatment</i> . 2007//. 33:193                                                                                                                                                                                                                                                           | Level 1, Form Title/abstract screen |
| 696 | <b>Bruce R Schackman, Paul A Teixeira, Ann B Beeder.</b> Offers of hepatitis C care do not lead to treatment.. <i>Journal of urban health : bulletin of the New York Academy of Medicine</i> . 2007//. 84:455                                                                                                                                                                                                                                                    | Level 1, Form Title/abstract screen |
| 697 | <b>Linda Weinreb, Joanne Nicholson, Valerie Williams, Fran Anthes.</b>                                                                                                                                                                                                                                                                                                                                                                                           | Level 1, Form                       |

|     |                                                                                                                                                                                                                                                                              |                                     |
|-----|------------------------------------------------------------------------------------------------------------------------------------------------------------------------------------------------------------------------------------------------------------------------------|-------------------------------------|
|     | Integrating behavioral health services for homeless mothers and children in primary care.. <i>The American journal of orthopsychiatry</i> . 2007//. 77:142                                                                                                                   | Title/abstract screen               |
| 698 | <b>Susan A Murphy, L M Collins, A John Rush.</b> Customizing treatment to the patient: adaptive treatment strategies.. <i>Drug and alcohol dependence</i> . 2007//. 88 Suppl 2:S1                                                                                            | Level 1, Form Title/abstract screen |
| 699 | <b>Eunice C Wong, Grant N Marshall, Vivek Shetty, Annie Zhou, Howard Belzberg, Dennis-Duke R Yamashita.</b> Survivors of violence-related facial injury: psychiatric needs and barriers to mental health care.. <i>General hospital psychiatry</i> . 2007//. 29:117          | Level 1, Form Title/abstract screen |
| 700 | <b>J Miles, K Sugumar, F Macrory, D G Sims, S W D'Souza.</b> Methadone-exposed newborn infants: outcome after alterations to a service for mothers and infants.. <i>Child: care, health and development</i> . 2007//. 33:206                                                 | Level 1, Form Title/abstract screen |
| 701 | <b>Robert K Brooner, Michael S Kidorf, Van L King, Kenneth B Stoller, Karin J Neufeld, Ken Kolodner.</b> Comparing adaptive stepped care and monetary-based voucher interventions for opioid dependence.. <i>Drug and alcohol dependence</i> . 2007//. 88 Suppl 2:S14        | Level 1, Form Title/abstract screen |
| 702 | <b>Sandra L Tunis, Douglas E Faries, Michael D Stensland, Donald P Hay, Bruce J Kinon.</b> An examination of factors affecting persistence with initial antipsychotic treatment in patients with schizophrenia.. <i>Current medical research and opinion</i> . 2007//. 23:97 | Level 1, Form Title/abstract screen |
| 703 | <b>Laurie Drabble.</b> Pathways to collaboration: exploring values and collaborative practice between child welfare and substance abuse treatment fields.. <i>Child maltreatment</i> . 2007//. 12:31                                                                         | Level 1, Form Title/abstract screen |
| 704 | <b>Daniel E Rivera, Michael D Pew, Linda M Collins.</b> Using engineering control principles to inform the design of adaptive interventions: a conceptual introduction.. <i>Drug and alcohol dependence</i> . 2007//. 88 Suppl 2:S31                                         | Level 1, Form Title/abstract screen |
| 705 | <b>Susan A Murphy, Kevin G Lynch, David Oslin, James R McKay, Tom TenHave.</b> Developing adaptive treatment strategies in substance abuse research.. <i>Drug and alcohol dependence</i> . 2007//. 88 Suppl 2:S24                                                            | Level 1, Form Title/abstract screen |
| 706 | <b>Ronda C Zakocs, Sarah Guckenbug.</b> What coalition factors foster community capacity? Lessons learned from the Fighting Back Initiative.. <i>Health education &amp; behavior : the official publication of the Society for Public Health Education</i> . 2007//. 34:354  | Level 1, Form Title/abstract screen |
| 707 | <b>Joanne Csete.</b> "Second on the needle": human rights of women who use drugs.. <i>HIV/AIDS policy &amp; law review</i> . 2006//. 11:66                                                                                                                                   | Level 1, Form Title/abstract screen |
| 708 | <b>Alexie Cintron, R Sean Morrison.</b> Pain and ethnicity in the United States: A systematic review.. <i>Journal of palliative medicine</i> . 2006//. 9:1454                                                                                                                | Level 1, Form Title/abstract screen |
| 709 | <b>Christianne Esposito-Smythers, Anthony Spirito, Rebecca Uth, Heather LaChance.</b> Cognitive behavioral treatment for suicidal alcohol abusing adolescents: development and pilot testing.. <i>The American journal on addictions</i> . 2006//. 15 Suppl 1:126            | Level 1, Form Title/abstract screen |
| 711 | <b>Thuy Boardman, Delwyn Catley, James E Grobe, Todd D Little, Jasjit S Ahluwalia.</b> Using motivational interviewing with smokers: do therapist behaviors relate to engagement and therapeutic alliance?.. <i>Journal of substance abuse treatment</i> . 2006//. 31:329    | Level 1, Form Title/abstract screen |
| 712 | <b>Samantha P Clarke, Lindsay G Oades, Trevor P Crowe, Frank P Deane.</b> Collaborative goal technology: theory and practice.. <i>Psychiatric rehabilitation</i>                                                                                                             | Level 1, Form Title/abstract        |

|     |                                                                                                                                                                                                                                                                                                                                                    |                                           |
|-----|----------------------------------------------------------------------------------------------------------------------------------------------------------------------------------------------------------------------------------------------------------------------------------------------------------------------------------------------------|-------------------------------------------|
|     | <i>journal</i> . 2006//. 30:129                                                                                                                                                                                                                                                                                                                    | screen                                    |
| 713 | <b>Barbara J Felton, Amy Barr, Gary Clark, Sam J Tsemberis.</b> ACT team members' responses to training in recovery-oriented practices.. <i>Psychiatric rehabilitation journal</i> . 2006//. 30:112                                                                                                                                                | Level 1, Form<br>Title/abstract<br>screen |
| 714 | <b>J Cornuz, R Bize.</b> Motivating for cancer prevention.. <i>Recent results in cancer research. Fortschritte der Krebsforschung. Progres dans les recherches sur le cancer</i> . 2006//. 168:7                                                                                                                                                   | Level 1, Form<br>Title/abstract<br>screen |
| 715 | <b>Lawrence Blonde, Judith Dempster, Joanne M Gallivan, Elizabeth Warren-Boulton.</b> Reducing cardiovascular disease risk in patients with diabetes: a message from the National Diabetes Education Program.. <i>Journal of the American Academy of Nurse Practitioners</i> . 2006//. 18:524                                                      | Level 1, Form<br>Title/abstract<br>screen |
| 716 | <b>Rebecca de Guzman, Noelle R Leonard, Marya Viorst Gwadz, Rebecca Young, Amanda S Ritchie, Grisel Arredondo, Marion Riedel.</b> "I thought there was no hope for me": a behavioral intervention for urban mothers with problem drinking.. <i>Qualitative health research</i> . 2006//. 16:1252                                                   | Level 2, Form<br>Full Text<br>Screening   |
| 717 | <b>Daniel Z Lieberman.</b> Effects of a personified guide on adherence to an online program for alcohol abusers.. <i>Cyberpsychology &amp; behavior : the impact of the Internet, multimedia and virtual reality on behavior and society</i> . 2006//. 9:603                                                                                       | Level 1, Form<br>Title/abstract<br>screen |
| 718 | <b>Natalie I Vokes, Jeannine M Bailey, Karin V Rhodes.</b> "Should I give you my smoking lecture now or later?" Characterizing emergency physician smoking discussions and cessation counseling.. <i>Annals of emergency medicine</i> . 2006//. 48:406                                                                                             | Level 1, Form<br>Title/abstract<br>screen |
| 719 | <b>J Brazier, I Tumur, M Holmes, M Ferriter, G Parry, K Dent-Brown, S Paisley.</b> Psychological therapies including dialectical behaviour therapy for borderline personality disorder: a systematic review and preliminary economic evaluation.. <i>Health technology assessment (Winchester, England)</i> . 2006//. 10:iii                       | Level 1, Form<br>Title/abstract<br>screen |
| 721 | <b>Mudita Rastogi, Serena Wadhwa.</b> Substance abuse among Asian Indians in the United States: a consideration of cultural factors in etiology and treatment.. <i>Substance use &amp; misuse</i> . 2006//. 41:1239                                                                                                                                | Level 1, Form<br>Title/abstract<br>screen |
| 722 | <b>Alexandra Fickenscher, Douglas K Novins, Spero M Manson.</b> Illicit peyote use among American Indian adolescents in substance abuse treatment: a preliminary investigation.. <i>Substance use &amp; misuse</i> . 2006//. 41:1139                                                                                                               | Level 1, Form<br>Title/abstract<br>screen |
| 723 | <b>Robin Dauterive.</b> Was my patient fortunate or forsaken?.. <i>The Journal of clinical ethics</i> . 2006//. 17:90                                                                                                                                                                                                                              | Level 1, Form<br>Title/abstract<br>screen |
| 724 | <b>Suzanne M Burke.</b> The case manager's view.. <i>The Journal of clinical ethics</i> . 2006//. 17:83                                                                                                                                                                                                                                            | Level 1, Form<br>Title/abstract<br>screen |
| 725 | <b>Ann Boyer, Debbie Indyk.</b> Shaping garments of care: tools for maximizing adherence potential.. <i>Social work in health care</i> . 2006//. 42:151                                                                                                                                                                                            | Level 1, Form<br>Title/abstract<br>screen |
| 726 | <b>Amy Knowlton, Julia Arnsten, Lois Eldred, James Wilkinson, Marc Gourevitch, Starley Shade, Krista Dowling, David Purcell,INSPIRE Team.</b> Individual, interpersonal, and structural correlates of effective HAART use among urban active injection drug users.. <i>Journal of acquired immune deficiency syndromes (1999)</i> . 2006//. 41:486 | Level 1, Form<br>Title/abstract<br>screen |
| 727 | <b>Sandra G Adams, Jacqueline A Pugh, Lewis E Kazis, Shuko Lee, Antonio Anzueto.</b> Characteristics associated with sustained abstinence from smoking among patients with COPD.. <i>The American journal of medicine</i> . 2006//.                                                                                                                | Level 1, Form<br>Title/abstract<br>screen |

|     |                                                                                                                                                                                                                                                                                                 |                                           |
|-----|-------------------------------------------------------------------------------------------------------------------------------------------------------------------------------------------------------------------------------------------------------------------------------------------------|-------------------------------------------|
|     | 119:441                                                                                                                                                                                                                                                                                         |                                           |
| 728 | <b>James D Wilkinson, Wei Zhao, Scott Santibanez, Julia Arnsten, Amy Knowlton, Cynthia A Gomez, Lisa R Metsch,INSPIRE Study Group.</b> Providers' HIV prevention discussions with HIV-seropositive injection drug users.. <i>AIDS and behavior</i> . 2006//. 10:699                             | Level 1, Form<br>Title/abstract<br>screen |
| 730 | <b>Marc D Basson, Timothy W Butler, Harish Verma.</b> Predicting patient nonappearance for surgery as a scheduling strategy to optimize operating room utilization in a veterans' administration hospital.. <i>Anesthesiology</i> . 2006//. 104:826                                             | Level 1, Form<br>Title/abstract<br>screen |
| 733 | <b>Judy Graham-Garcia, Beverly George-Gay, Douglas Heater, Abigail Butts, Janie Heath.</b> Application of the Synergy Model with the surgical care of smokers.. <i>Critical care nursing clinics of North America</i> . 2006//. 18:29                                                           | Level 1, Form<br>Title/abstract<br>screen |
| 735 | <b>C A Binks, M Fenton, L McCarthy, T Lee, C E Adams, C Duggan.</b> Psychological therapies for people with borderline personality disorder.. <i>The Cochrane database of systematic reviews</i> . 2006//. #volume#:CD005652                                                                    | Level 1, Form<br>Title/abstract<br>screen |
| 736 | <b>Mark P Popenhagen.</b> Collaborative practice. Undertreatment of pain and fears of addiction in pediatric chronic pain patients: how do we stop the problem?.. <i>Journal for specialists in pediatric nursing : JSPN</i> . 2006//. 11:61                                                    | Level 1, Form<br>Title/abstract<br>screen |
| 737 | <b>Jane L Givens, Catherine J Datto, Katy Ruckdeschel, Kathryn Knott, Cynthia Zubritsky, David W Oslin, Soumya Nyshadham, Poornima Vanguri, Frances K Barg.</b> Older patients' aversion to antidepressants. A qualitative study.. <i>Journal of general internal medicine</i> . 2006//. 21:146 | Level 1, Form<br>Title/abstract<br>screen |
| 739 | <b>Karen Herzig, Dale Danley, Rebecca Jackson, Ruth Petersen, Linda Chamberlain, Barbara Gerbert.</b> Seizing the 9-month moment: addressing behavioral risks in prenatal patients.. <i>Patient education and counseling</i> . 2006//. 61:228                                                   | Level 2, Form<br>Full Text<br>Screening   |
| 740 | <b>J Hamann, A Loh, J Kasper, B Neuner, C Spies, W Kissling, M Harter, C Heesen.</b> [Effects of a shared decision making model in psychiatric and neurologic practice].. <i>Der Nervenarzt</i> . 2006//. 77:1071                                                                               | Level 1, Form<br>Title/abstract<br>screen |
| 741 | <b>Linda S Kahn, Chester H Fox, Julie Krause-Kelly, Diane E Berdine, Renee B Cadzow.</b> Identifying barriers and facilitating factors to improve screening mammography rates in women diagnosed with mental illness and substance use disorders.. <i>Women &amp; health</i> . 2005//. 42:111   | Level 1, Form<br>Title/abstract<br>screen |
| 742 | <b>Maxima Encinares, Gabriella Golea.</b> Client-centered care for individuals with dual diagnoses in the justice system.. <i>Journal of psychosocial nursing and mental health services</i> . 2005//. 43:29                                                                                    | Level 1, Form<br>Title/abstract<br>screen |
| 743 | <b>Mark Ilgen, Rudolf Moos.</b> Deterioration following alcohol-use disorder treatment in project MATCH.. <i>Journal of studies on alcohol</i> . 2005//. 66:517                                                                                                                                 | Level 1, Form<br>Title/abstract<br>screen |
| 744 | <b>Cynthia M A Geppert, Sanjeev Arora.</b> Ethical issues in the treatment of hepatitis C.. <i>Clinical gastroenterology and hepatology : the official clinical practice journal of the American Gastroenterological Association</i> . 2005//. 3:937                                            | Level 1, Form<br>Title/abstract<br>screen |
| 745 | <b>Annemarie Beldon, Suzanne Crozier.</b> Health promotion in pregnancy: the role of the midwife.. <i>The journal of the Royal Society for the Promotion of Health</i> . 2005//. 125:216                                                                                                        | Level 1, Form<br>Title/abstract<br>screen |
| 746 | <b>Chanson D Noether, Norma Finkelstein, Nancy R VanDeMark, Andrea Savage, Beth Glover Reed, Dawn Jahn Moses.</b> Design strengths and issues of SAMHSA's Women, Co-occurring Disorders, and Violence Study.. <i>Psychiatric services (Washington, D.C.)</i> . 2005//. 56:1233                  | Level 2, Form<br>Full Text<br>Screening   |

|     |                                                                                                                                                                                                                                                                                                                                                                                                                                                                             |                                           |
|-----|-----------------------------------------------------------------------------------------------------------------------------------------------------------------------------------------------------------------------------------------------------------------------------------------------------------------------------------------------------------------------------------------------------------------------------------------------------------------------------|-------------------------------------------|
| 747 | <b>Emily Gray, Jim McCambridge, John Strang.</b> The effectiveness of motivational interviewing delivered by youth workers in reducing drinking, cigarette and cannabis smoking among young people: quasi-experimental pilot study.. <i>Alcohol and alcoholism (Oxford, Oxfordshire)</i> . 2005//. 40:535                                                                                                                                                                   | Level 1, Form<br>Title/abstract<br>screen |
| 748 | <b>Duncan Mortimer, Leonie Segal.</b> Economic evaluation of interventions for problem drinking and alcohol dependence: cost per QALY estimates.. <i>Alcohol and alcoholism (Oxford, Oxfordshire)</i> . 2005//. 40:549                                                                                                                                                                                                                                                      | Level 1, Form<br>Title/abstract<br>screen |
| 749 | <b>Richard Christensen, Lorrie Garces.</b> Encouraging transdisciplinary approaches to care.. <i>Journal of health care for the poor and underserved</i> . 2005//. 16:181                                                                                                                                                                                                                                                                                                   | Level 1, Form<br>Title/abstract<br>screen |
| 750 | <b>Victoria A Cargill, Valerie E Stone.</b> HIV/AIDS: a minority health issue.. <i>The Medical clinics of North America</i> . 2005//. 89:895                                                                                                                                                                                                                                                                                                                                | Level 1, Form<br>Title/abstract<br>screen |
| 751 | <b>Margaret Lynch.</b> Caring for the patient with delirium tremens.. <i>The Journal of practical nursing</i> . 2005//. 55:21                                                                                                                                                                                                                                                                                                                                               | Level 1, Form<br>Title/abstract<br>screen |
| 753 | <b>H Westley Clark, A Kathryn Power.</b> Women, Co-occurring Disorders, and Violence Study: a case for trauma-informed care.. <i>Journal of substance abuse treatment</i> . 2005//. 28:145                                                                                                                                                                                                                                                                                  | Level 1, Form<br>Title/abstract<br>screen |
| 754 | <b>Steffanie A Strathdee, M Latka, J Campbell, P T O'Driscoll, E T Golub, F Kapadia, R A Pollini, R S Garfein, D L Thomas, H Hagan, Study to Reduce Intravenous Exposures Project.</b> Factors associated with interest in initiating treatment for hepatitis C Virus (HCV) infection among young HCV-infected injection drug users.. <i>Clinical infectious diseases : an official publication of the Infectious Diseases Society of America</i> . 2005//. 40 Suppl 5:S304 | Level 1, Form<br>Title/abstract<br>screen |
| 756 | <b>Jeffrey T Parsons, Elana Rosof, Joseph C Punzalan, Lauren Di Maria.</b> Integration of motivational interviewing and cognitive behavioral therapy to improve HIV medication adherence and reduce substance use among HIV-positive men and women: results of a pilot project.. <i>AIDS patient care and STDs</i> . 2005//. 19:31                                                                                                                                          | Level 1, Form<br>Title/abstract<br>screen |
| 757 | <b>Mark Sullivan, Betty Ferrell.</b> Ethical challenges in the management of chronic nonmalignant pain: negotiating through the cloud of doubt.. <i>The journal of pain : official journal of the American Pain Society</i> . 2005//. 6:2                                                                                                                                                                                                                                   | Level 1, Form<br>Title/abstract<br>screen |
| 758 | <b>Scott D Miller, Barry L Duncan, Ryan Sorrell, George S Brown.</b> The partners for change outcome management system.. <i>Journal of clinical psychology</i> . 2005//. 61:199                                                                                                                                                                                                                                                                                             | Level 1, Form<br>Title/abstract<br>screen |
| 759 | <b>Kathleen M Wesa, Patricia Culliton.</b> Recommendations and guidelines regarding the preferred research protocol for investigating the impact of an optimal healing environment on patients with substance abuse.. <i>Journal of alternative and complementary medicine (New York, N.Y.)</i> . 2004//. 10 Suppl 1:S193                                                                                                                                                   | Level 1, Form<br>Title/abstract<br>screen |
| 760 | <b>Denise M Dudzinski, Mark Sullivan.</b> When agreeing with the patient is not enough: a schizophrenic woman requests pregnancy termination.. <i>General hospital psychiatry</i> . 2004//. 26:475                                                                                                                                                                                                                                                                          | Level 1, Form<br>Title/abstract<br>screen |
| 762 | <b>Benny J Primm, Lucille Perez, Gary C Dennis, Lennette Benjamin, Westley Clark, Kathy Keough, W David Leak, Richard Payne, Deborah Smith, Louis W Sullivan, National Medical Association.</b> Managing pain: The Challenge in Underserved Populations: Appropriate Use Versus Abuse and Diversion.. <i>Journal of the National Medical Association</i> . 2004//. 96:1152                                                                                                  | Level 1, Form<br>Title/abstract<br>screen |

|     |                                                                                                                                                                                                                                                                                                                                                      |                                           |
|-----|------------------------------------------------------------------------------------------------------------------------------------------------------------------------------------------------------------------------------------------------------------------------------------------------------------------------------------------------------|-------------------------------------------|
| 763 | <b>Roberto Secades-Villa, Jose Ramon Fernande-Hermida, Cristina Arnaez-Montaraz.</b> Motivational interviewing and treatment retention among drug user patients: a pilot study.. <i>Substance use &amp; misuse</i> . 2004//. 39:1369                                                                                                                 | Level 1, Form<br>Title/abstract<br>screen |
| 764 | <b>Holly A Sindelar, Ana M Abrantes, Chantelle Hart, William Lewander, Anthony Spirito.</b> Motivational interviewing in pediatric practice.. <i>Current problems in pediatric and adolescent health care</i> . 2004//. 34:322                                                                                                                       | Level 1, Form<br>Title/abstract<br>screen |
| 765 | <b>Roxanne Struthers, Felicia S Hodge.</b> Sacred tobacco use in Ojibwe communities.. <i>Journal of holistic nursing : official journal of the American Holistic Nurses' Association</i> . 2004//. 22:209                                                                                                                                            | Level 1, Form<br>Title/abstract<br>screen |
| 767 | <b>John de Miranda.</b> Coming to the addiction community: consumer--directed care.. <i>Behavioral healthcare tomorrow</i> . 2004//. 13:25                                                                                                                                                                                                           | Level 1, Form<br>Title/abstract<br>screen |
| 768 | <b>D A Murphy, W D Marelich, D Hoffman, W N Steers.</b> Predictors of antiretroviral adherence.. <i>AIDS care</i> . 2004//. 16:471                                                                                                                                                                                                                   | Level 1, Form<br>Title/abstract<br>screen |
| 769 | <b>Ching-Yen Chen, Ying-Jen Chen, Yeong-Yuh Juang, Chia-Yih Liu, Ching-I Hung.</b> Role and attitude of companions on geriatric psychiatry outpatient visits in Taiwan.. <i>Psychiatry and clinical neurosciences</i> . 2004//. 58:257                                                                                                               | Level 1, Form<br>Title/abstract<br>screen |
| 770 | <b>Daliah Heller, Kate McCoy, Chinazo Cunningham.</b> An invisible barrier to integrating HIV primary care with harm reduction services: philosophical clashes between the harm reduction and medical models.. <i>Public health reports (Washington, D.C. : 1974)</i> . 2004//. 119:32                                                               | Level 1, Form<br>Title/abstract<br>screen |
| 771 | <b>Douglas Zatzick, Peter Roy-Byrne, Joan Russo, Frederick Rivara, RoseAnne Droesch, Amy Wagner, Chris Dunn, Gregory Jurkovich, Edwina Uehara, Wayne Katon.</b> A randomized effectiveness trial of stepped collaborative care for acutely injured trauma survivors.. <i>Archives of general psychiatry</i> . 2004//. 61:498                         | Level 1, Form<br>Title/abstract<br>screen |
| 773 | <b>Beverly Beltran Cagle.</b> Kicking butt. A review of smoking cessation strategies.. <i>Advance for nurse practitioners</i> . 2004//. 12:61                                                                                                                                                                                                        | Level 1, Form<br>Title/abstract<br>screen |
| 774 | <b>Henning Krampe, Thilo Wagner, Heinrich Kufner, Henriette Jahn, Sabina Stawicki, Jennifer Reinhold, Wiebke Timmer, Birgit Kroner-Herwig, Hannelore Ehrenreich.</b> Therapist rotation--a new element in the outpatient treatment of alcoholism.. <i>Substance use &amp; misuse</i> . 2004//. 39:135                                                | Level 2, Form<br>Full Text<br>Screening   |
| 775 | <b>Wanda K Nicholson, Bergina Brickhouse, Neil R Powe, Yvonne Bronner.</b> Prenatal patients' views of prenatal care services: a medical center-based assessment of knowledge and intent to use support services.. <i>Ethnicity &amp; disease</i> . 2004//. 14:13                                                                                    | Level 1, Form<br>Title/abstract<br>screen |
| 776 | <b>Lewis E Kazis, Donald R Miller, Katherine M Skinner, Austin Lee, Xinhua S Ren, Jack A Clark, William H Rogers, Avron 3rd Spiro, Alfredo Selim, Mark Linzer, Susan M Payne, Dorcas Mansell, R Graeme Fincke.</b> Patient-reported measures of health: The Veterans Health Study.. <i>The Journal of ambulatory care management</i> . 2004//. 27:70 | Level 1, Form<br>Title/abstract<br>screen |
| 777 | <b>Douglas B Marlowe.</b> Integrating substance abuse treatment and criminal justice supervision.. <i>Science &amp; practice perspectives</i> . 2003//. 2:4                                                                                                                                                                                          | Level 1, Form<br>Title/abstract<br>screen |
| 778 | <b>Andrew Tatarsky.</b> Harm reduction psychotherapy: extending the reach of traditional substance use treatment.. <i>Journal of substance abuse treatment</i> . 2003//. 25:249                                                                                                                                                                      | Level 2, Form<br>Full Text<br>Screening   |

|     |                                                                                                                                                                                                                                                                                                                                                               |                                           |
|-----|---------------------------------------------------------------------------------------------------------------------------------------------------------------------------------------------------------------------------------------------------------------------------------------------------------------------------------------------------------------|-------------------------------------------|
| 779 | <b>Kathryn Godfrey.</b> Clinical management where medicine meets management. Get out, stay out.. <i>The Health service journal.</i> 2003//. 113:28                                                                                                                                                                                                            | Level 1, Form<br>Title/abstract<br>screen |
| 781 | <b>Julia B Graham, Barbara L Brush, Reverend Maureen Andrew.</b> Spiritual-care process and content: lessons learned from the ECHO Project.. <i>Journal of the American Academy of Nurse Practitioners.</i> 2003//. 15:473                                                                                                                                    | Level 1, Form<br>Title/abstract<br>screen |
| 782 | <b>Richard T Penson, Laura A Fergus, Ross J Haston, John R Clark, Andrew Demotses, James J O'Connell, Bruce A Chabner, Thomas J Jr Lynch.</b> The Kenneth B. Schwartz Center at Massachusetts General Hospital hematology-oncology department: hope for the homeless.. <i>The oncologist.</i> 2003//. 8:488                                                   | Level 1, Form<br>Title/abstract<br>screen |
| 783 | <b>Eric F Wagner.</b> Conceptualizing alcohol treatment research for Hispanic/Latino adolescents.. <i>Alcoholism, clinical and experimental research.</i> 2003//. 27:1349                                                                                                                                                                                     | Level 2, Form<br>Full Text<br>Screening   |
| 784 | <b>J Scott Tonigan.</b> Project Match treatment participation and outcome by self-reported ethnicity.. <i>Alcoholism, clinical and experimental research.</i> 2003//. 27:1340                                                                                                                                                                                 | Level 1, Form<br>Title/abstract<br>screen |
| 785 | <b>Chris Dunn.</b> Brief motivational interviewing interventions targeting substance abuse in the acute care medical setting.. <i>Seminars in clinical neuropsychiatry.</i> 2003//. 8:188                                                                                                                                                                     | Level 1, Form<br>Title/abstract<br>screen |
| 786 | <b>John Foster, Colin Brewer, Terry Steele.</b> Naltrexone implants can completely prevent early (1-month) relapse after opiate detoxification: a pilot study of two cohorts totalling 101 patients with a note on naltrexone blood levels.. <i>Addiction biology.</i> 2003//. 8:211                                                                          | Level 1, Form<br>Title/abstract<br>screen |
| 787 | <b>George E Woody, Robert Gallop, Lester Luborsky, Jack Blaine, Arlene Frank, Ihsan M Salloum, David Gastfriend, Paul Crits-Christoph, Cocaine Psychotherapy Study Group.</b> HIV risk reduction in the National Institute on Drug Abuse Cocaine Collaborative Treatment Study.. <i>Journal of acquired immune deficiency syndromes (1999).</i> 2003//. 33:82 | Level 1, Form<br>Title/abstract<br>screen |
| 789 | <b>Kevin Moore, Derek McLaughlin.</b> Depression: the challenge for all healthcare professionals.. <i>Nursing standard (Royal College of Nursing (Great Britain) : 1987).</i> 2003//. 17:45                                                                                                                                                                   | Level 1, Form<br>Title/abstract<br>screen |
| 790 | <b>Elias Vasquez, Marie Eileen Onieal.</b> Substance abuse education for nurse practitioners in primary care.. <i>Substance abuse.</i> 2002//. 23:235                                                                                                                                                                                                         | Level 1, Form<br>Title/abstract<br>screen |
| 791 | <b>Patricia E Penn, Audrey J Brooks, Brenda DeWitt Worsham.</b> Treatment concerns of women with co-occurring serious mental illness and substance abuse disorders.. <i>Journal of psychoactive drugs.</i> 2002//. 34:355                                                                                                                                     | Level 1, Form<br>Title/abstract<br>screen |
| 792 | <b>Louise Tiffen, Susan Sheridan.</b> Improving take-up of hepatitis C services.. <i>Nursing times.</i> 2002//. 98:30                                                                                                                                                                                                                                         | Level 1, Form<br>Title/abstract<br>screen |
| 793 | <b>Jonathan P Lacro, Laura B Dunn, Christian R Dolder, Susan G Leckband, Dilip V Jeste.</b> Prevalence of and risk factors for medication nonadherence in patients with schizophrenia: a comprehensive review of recent literature.. <i>The Journal of clinical psychiatry.</i> 2002//. 63:892                                                                | Level 1, Form<br>Title/abstract<br>screen |
| 794 | <b>Jorg Andreas Nikitopoulos, Bernhard Croissant.</b> [New holistic treatment strategies in alcoholism: the goal is abstinence].. <i>Pflege Zeitschrift.</i> 2002//. 55:545                                                                                                                                                                                   | Level 1, Form<br>Title/abstract<br>screen |
| 795 | <b>R Conviser, M B Pounds.</b> The role of ancillary services in client-centred systems of care.. <i>AIDS care.</i> 2002//. 14 Suppl 1:S119                                                                                                                                                                                                                   | Level 1, Form<br>Title/abstract           |



|     |                                                                                                                                                                                                                                                                                                         |                                           |
|-----|---------------------------------------------------------------------------------------------------------------------------------------------------------------------------------------------------------------------------------------------------------------------------------------------------------|-------------------------------------------|
|     |                                                                                                                                                                                                                                                                                                         | screen                                    |
| 797 | <b>Kathryn I Pollak, Kimberly S H Yarnall, Barbara K Rimer, Isaac Lipkus, Pauline R Lyna.</b> Factors associated with patient-recalled smoking cessation advice in a low-income clinic.. <i>Journal of the National Medical Association.</i> 2002//. 94:354                                             | Level 1, Form<br>Title/abstract<br>screen |
| 798 | <b>Arthur Margolin, S Kelly Avants, Theodore R Holford.</b> Interpreting conflicting findings from clinical trials of auricular acupuncture for cocaine addiction: does treatment context influence outcome?.. <i>Journal of alternative and complementary medicine (New York, N.Y.).</i> 2002//. 8:111 | Level 1, Form<br>Title/abstract<br>screen |
| 799 | <b>Jamie Winters, William Fals-Stewart, Timothy J O'Farrell, Gary R Birchler, Michelle L Kelley.</b> Behavioral couples therapy for female substance-abusing patients: effects on substance use and relationship adjustment.. <i>Journal of consulting and clinical psychology.</i> 2002//. 70:344      | Level 1, Form<br>Title/abstract<br>screen |
| 800 | <b>Mark Latowsky.</b> Safer injection facilities for injection drug users: the debate continues.. <i>CMAJ : Canadian Medical Association journal = journal de l'Association medicale canadienne.</i> 2002//. 166:419                                                                                    | Level 1, Form<br>Title/abstract<br>screen |
| 802 | <b>A Lancelot, J Sims.</b> Mental illness and substance abuse.. <i>Nursing times.</i> 2001//. 97:36                                                                                                                                                                                                     | Level 1, Form<br>Title/abstract<br>screen |
| 803 | <b>N Falsafi.</b> The use of holistic concepts in professional practice.. <i>Journal of holistic nursing : official journal of the American Holistic Nurses' Association.</i> 2001//. 19:390                                                                                                            | Level 1, Form<br>Title/abstract<br>screen |
| 804 | <b>R C Kessler, P A Berglund, M L Bruce, J R Koch, E M Laska, P J Leaf, R W Manderscheid, R A Rosenheck, E E Walters, P S Wang.</b> The prevalence and correlates of untreated serious mental illness.. <i>Health services research.</i> 2001//. 36:987                                                 | Level 1, Form<br>Title/abstract<br>screen |
| 805 | <b>G J Treisman, A F Angelino, H E Hutton.</b> Psychiatric issues in the management of patients with HIV infection.. <i>JAMA.</i> 2001//. 286:2857                                                                                                                                                      | Level 1, Form<br>Title/abstract<br>screen |
| 806 | <b>L R Fenton, J J Cecero, C Nich, T L Frankforter, K M Carroll.</b> Perspective is everything: the predictive validity of six working alliance instruments.. <i>The Journal of psychotherapy practice and research.</i> 2001//. 10:262                                                                 | Level 1, Form<br>Title/abstract<br>screen |
| 808 | <b>M Encinares, K A Lorbergs.</b> Framing nursing practice within a forensic outpatient service.. <i>Journal of psychosocial nursing and mental health services.</i> 2001//. 39:35                                                                                                                      | Level 1, Form<br>Title/abstract<br>screen |
| 809 | <b>G Bonner.</b> Decision making for health care professionals: use of decision trees within the community mental health setting.. <i>Journal of advanced nursing.</i> 2001//. 35:349                                                                                                                   | Level 1, Form<br>Title/abstract<br>screen |
| 810 | <b>R MacQueen.</b> Alcohol and drug services have been patient centred for years.. <i>BMJ (Clinical research ed.).</i> 2001//. 323:111                                                                                                                                                                  | Level 1, Form<br>Title/abstract<br>screen |
| 811 | <b>H C Mutasa.</b> Risk factors associated with noncompliance with methadone substitution therapy (MST) and relapse among chronic opiate users in an Outer London community.. <i>Journal of advanced nursing.</i> 2001//. 35:97                                                                         | Level 1, Form<br>Title/abstract<br>screen |
| 812 | <b>B T Hoyt, R L Norton.</b> Online medical control and initial refusal of care: does it help to talk with the patient?.. <i>Academic emergency medicine : official journal of the Society for Academic Emergency Medicine.</i> 2001//. 8:725                                                           | Level 1, Form<br>Title/abstract<br>screen |
| 813 | <b>D F Zatzick, P Roy-Byrne, J E Russo, F P Rivara, A Koike, G J Jurkovich, W Katon.</b> Collaborative interventions for physically injured trauma survivors: a                                                                                                                                         | Level 1, Form<br>Title/abstract           |

|     |                                                                                                                                                                                                                                                                                                                                                              |                                     |
|-----|--------------------------------------------------------------------------------------------------------------------------------------------------------------------------------------------------------------------------------------------------------------------------------------------------------------------------------------------------------------|-------------------------------------|
|     | pilot randomized effectiveness trial.. <i>General hospital psychiatry</i> . 2001//. 23:114                                                                                                                                                                                                                                                                   | screen                              |
| 814 | <b>P Denning</b> . Strategies for implementation of harm reduction in treatment settings.. <i>Journal of psychoactive drugs</i> . 2001//. 33:23                                                                                                                                                                                                              | Level 2, Form Full Text Screening   |
| 815 | <b>J P Barber, L Luborsky, R Gallop, P Crits-Christoph, A Frank, R D Weiss, M E Thase, M B Connolly, M Gladis, C Foltz, L Siqueland</b> . Therapeutic alliance as a predictor of outcome and retention in the National Institute on Drug Abuse Collaborative Cocaine Treatment Study.. <i>Journal of consulting and clinical psychology</i> . 2001//. 69:119 | Level 2, Form Full Text Screening   |
| 816 | <b>K R Williams, J Galas, D Light, C Pepper, C Ryan, A E Kleinmann, R Burreight, P Donovick</b> . Head injury and alexithymia: implications for family practice care.. <i>Brain injury</i> . 2001//. 15:349                                                                                                                                                  | Level 1, Form Title/abstract screen |
| 817 | <b>R D Fallot, M Harris</b> . A trauma-informed approach to screening and assessment.. <i>New directions for mental health services</i> . 2001//. #volume#:23                                                                                                                                                                                                | Level 1, Form Title/abstract screen |
| 818 | <b>L B Mauksch, S M Tucker, W J Katon, J Russo, J Cameron, E Walker, R Spitzer</b> . Mental illness, functional impairment, and patient preferences for collaborative care in an uninsured, primary care population.. <i>The Journal of family practice</i> . 2001//. 50:41                                                                                  | Level 1, Form Title/abstract screen |
| 819 | <b>E M McGee</b> . Alcoholics Anonymous and nursing. Lessons in holism and spiritual care.. <i>Journal of holistic nursing : official journal of the American Holistic Nurses' Association</i> . 2000//. 18:11                                                                                                                                               | Level 1, Form Title/abstract screen |
| 820 | <b>K E Bauman, S T Ennett, V A Foshee, M Pemberton, T S King, G G Koch</b> . Influence of a family-directed program on adolescent cigarette and alcohol cessation.. <i>Prevention science : the official journal of the Society for Prevention Research</i> . 2000//. 1:227                                                                                  | Level 1, Form Title/abstract screen |
| 821 | <b>M Thompson</b> . Five giant leaps toward integrating health care delivery and ways to drive organizations to leap or get out of the way.. <i>The Journal of ambulatory care management</i> . 2000//. 23:1                                                                                                                                                 | Level 1, Form Title/abstract screen |
| 822 | <b>C G Long, M Williams, M Midgley, C R Hollin</b> . Within-program factors as predictors of drinking outcome following cognitive-behavioral treatment.. <i>Addictive behaviors</i> . 2000//. 25:573                                                                                                                                                         | Level 1, Form Title/abstract screen |
| 823 | <b>M S Neale, R A Rosenheck</b> . Therapeutic limit setting in an assertive community treatment program.. <i>Psychiatric services (Washington, D.C.)</i> . 2000//. 51:499                                                                                                                                                                                    | Level 1, Form Title/abstract screen |
| 824 | <b>M Olfson, D Mechanic, S Hansell, C A Boyer, J Walkup, P J Weiden</b> . Predicting medication noncompliance after hospital discharge among patients with schizophrenia.. <i>Psychiatric services (Washington, D.C.)</i> . 2000//. 51:216                                                                                                                   | Level 1, Form Title/abstract screen |
| 825 | <b>G D Comerchi, R Schwebel</b> . Substance abuse: an overview.. <i>Adolescent medicine (Philadelphia, Pa.)</i> . 2000//. 11:79                                                                                                                                                                                                                              | Level 1, Form Title/abstract screen |
| 827 | <b>M Olfson, D Mechanic, C A Boyer, S Hansell, J Walkup, P J Weiden</b> . Assessing clinical predictions of early rehospitalization in schizophrenia.. <i>The Journal of nervous and mental disease</i> . 1999//. 187:721                                                                                                                                    | Level 1, Form Title/abstract screen |
| 828 | <b>Anonymous</b> . Fiscal year (FY) 1999 funding opportunities. Substance Abuse and Mental Health Services Administration, HHS. Notice of funding availability.. <i>Federal register</i> . 1999//. 64:20318                                                                                                                                                  | Level 1, Form Title/abstract screen |

|     |                                                                                                                                                                                                                                                                                                                                                  |                                     |
|-----|--------------------------------------------------------------------------------------------------------------------------------------------------------------------------------------------------------------------------------------------------------------------------------------------------------------------------------------------------|-------------------------------------|
| 829 | <b>M S Edmands, L A Hoff, L Kaylor, L Mower, S Sorrell.</b> Bridging gaps between mind, body, & spirit. Healing the whole person.. <i>Journal of psychosocial nursing and mental health services</i> . 1999//. 37:35                                                                                                                             | Level 1, Form Title/abstract screen |
| 830 | <b>J K Ockene, A Adams, T G Hurley, E V Wheeler, J R Hebert.</b> Brief physician- and nurse practitioner-delivered counseling for high-risk drinkers: does it work?.. <i>Archives of internal medicine</i> . 1999//. 159:2198                                                                                                                    | Level 2, Form Full Text Screening   |
| 831 | <b>J B Frank, M F Rodowski.</b> Review of psychological issues in victims of domestic violence seen in emergency settings.. <i>Emergency medicine clinics of North America</i> . 1999//. 17:657                                                                                                                                                  | Level 1, Form Title/abstract screen |
| 832 | <b>O Kampman, K Lehtinen.</b> Compliance in psychoses.. <i>Acta psychiatrica Scandinavica</i> . 1999//. 100:167                                                                                                                                                                                                                                  | Level 1, Form Title/abstract screen |
| 833 | <b>G T Wilson, K L Loeb, B T Walsh, E Labouvie, E Petkova, X Liu, C Waternaux.</b> Psychological versus pharmacological treatments of bulimia nervosa: predictors and processes of change.. <i>Journal of consulting and clinical psychology</i> . 1999//. 67:451                                                                                | Level 1, Form Title/abstract screen |
| 835 | <b>N el-Guebaly, D C Hodgins, S Armstrong, J Addington.</b> Methodological and clinical challenges in evaluating treatment outcome of substance-related disorders and comorbidity.. <i>Canadian journal of psychiatry. Revue canadienne de psychiatrie</i> . 1999//. 44:264                                                                      | Level 1, Form Title/abstract screen |
| 837 | <b>L A Lawendowski.</b> A motivational intervention for adolescent smokers.. <i>Preventive medicine</i> . 1998//. 27:A39                                                                                                                                                                                                                         | Level 2, Form Full Text Screening   |
| 838 | <b>D P Stevens, K W Kizer, T W Elwood, G L Warden.</b> VA aligns health professions education with healthcare priorities.. <i>Journal of allied health</i> . 1998//. 27:123                                                                                                                                                                      | Level 1, Form Title/abstract screen |
| 839 | <b>S Creamer, C McMurtrie.</b> Special needs of pregnant and parenting women in recovery: a move toward a more woman-centered approach.. <i>Women's health issues : official publication of the Jacobs Institute of Women's Health</i> . 1998//. 8:239                                                                                           | Level 1, Form Title/abstract screen |
| 840 | <b>P Crits-Christoph, L Siqueland, J Chittams, J P Barber, A T Beck, A Frank, B Liese, L Luborsky, D Mark, D Mercer, L S Onken, L M Najavits, M E Thase, G Woody.</b> Training in cognitive, supportive-expressive, and drug counseling therapies for cocaine dependence.. <i>Journal of consulting and clinical psychology</i> . 1998//. 66:484 | Level 2, Form Full Text Screening   |
| 841 | <b>C C Butler, R Pill, N C Stott.</b> Qualitative study of patients' perceptions of doctors' advice to quit smoking: implications for opportunistic health promotion.. <i>BMJ (Clinical research ed.)</i> . 1998//. 316:1878                                                                                                                     | Level 1, Form Title/abstract screen |
| 842 | <b>D J Hess, C Kenner.</b> Families caring for children with fetal alcohol syndrome: the nurse's role in early identification and intervention.. <i>Holistic nursing practice</i> . 1998//. 12:47                                                                                                                                                | Level 1, Form Title/abstract screen |
| 843 | <b>S N Fisk.</b> The Association of Nurses in AIDS Care. Position paper on harm reduction and HIV care for drug users: integrating harm-reduction methods and HIV care.. <i>The Journal of the Association of Nurses in AIDS Care : JANAC</i> . 1998//. 9:19                                                                                     | Level 1, Form Title/abstract screen |
| 844 | <b>K M Carroll, G J Connors, N L Cooney, C C DiClemente, D M Donovan, R R Kadden, R L Longabaugh, B J Rounsaville, P W Wirtz, A Zweben.</b> Internal validity of Project MATCH treatments: discriminability and integrity.. <i>Journal of consulting and clinical psychology</i> . 1998//. 66:290                                                | Level 1, Form Title/abstract screen |

|     |                                                                                                                                                                                                                                                                                                                              |                                     |
|-----|------------------------------------------------------------------------------------------------------------------------------------------------------------------------------------------------------------------------------------------------------------------------------------------------------------------------------|-------------------------------------|
| 845 | <b>P D Friedmann, R Saitz, J H Samet.</b> Management of adults recovering from alcohol or other drug problems: relapse prevention in primary care.. <i>JAMA</i> . 1998//. 279:1227                                                                                                                                           | Level 2, Form Full Text Screening   |
| 846 | <b>S E Teagle, C D Brindis.</b> Substance use among pregnant adolescents: a comparison of self-reported use and provider perception.. <i>The Journal of adolescent health : official publication of the Society for Adolescent Medicine</i> . 1998//. 22:229                                                                 | Level 1, Form Title/abstract screen |
| 847 | <b>M Vojnovic, M Martinov-Cvejic, V Grujic.</b> [Biosocial aspects of physician-patient communication in general medicine].. <i>Medicinski pregled</i> . 1997//. 50:395                                                                                                                                                      | Level 1, Form Title/abstract screen |
| 848 | <b>M Soyka, C Kirchmayer, G Kotter, C John, E Lohnert, H J Moller.</b> [New possibilities in therapy and rehabilitation of alcohol dependent patients. Catamnestic study of the efficacy of ambulatory withdrawal therapy exemplified by a model facility].. <i>Fortschritte der Neurologie-Psychiatrie</i> . 1997//. 65:407 | Level 1, Form Title/abstract screen |
| 849 | <b>W S Fenton, C R Blyler, R K Heinsen.</b> Determinants of medication compliance in schizophrenia: empirical and clinical findings.. <i>Schizophrenia bulletin</i> . 1997//. 23:637                                                                                                                                         | Level 1, Form Title/abstract screen |
| 850 | <b>J K Ockene, E V Wheeler, A Adams, T G Hurley, J Hebert.</b> Provider training for patient-centered alcohol counseling in a primary care setting.. <i>Archives of internal medicine</i> . 1997//. 157:2334                                                                                                                 | Level 2, Form Full Text Screening   |
| 851 | <b>Anonymous.</b> Beyond the Therapeutic Alliance: Keeping the Drug-Dependent Individual in Treatment. Proceedings of a meeting. May 10-11, 1994.. <i>NIDA research monograph</i> . 1997//. 165:1                                                                                                                            | Level 1, Form Title/abstract screen |
| 853 | <b>M H Kearney.</b> Drug treatment for women: traditional models and new directions.. <i>Journal of obstetric, gynecologic, and neonatal nursing : JOGNN</i> . 1997//. 26:459                                                                                                                                                | Level 2, Form Full Text Screening   |
| 857 | <b>G Westland.</b> Biodynamic massage.. <i>Complementary therapies in nursing &amp; midwifery</i> . 1996//. 2:47                                                                                                                                                                                                             | Level 1, Form Title/abstract screen |
| 858 | <b>L Rew.</b> Health risks of homeless adolescents. Implications for holistic nursing.. <i>Journal of holistic nursing : official journal of the American Holistic Nurses' Association</i> . 1996//. 14:348                                                                                                                  | Level 1, Form Title/abstract screen |
| 859 | <b>E Arborelius, B Peterson.</b> Smoking discussions at the child health clinic. A passive, an advisory or a judgemental approach?.. <i>Scandinavian journal of caring sciences</i> . 1996//. 10:169                                                                                                                         | Level 1, Form Title/abstract screen |
| 860 | <b>J L Jacobs, L C Damson, D E Rogers.</b> One approach to care for patients infected with human immunodeficiency virus in an academic medical center.. <i>Bulletin of the New York Academy of Medicine</i> . 1996//. 73:301                                                                                                 | Level 1, Form Title/abstract screen |
| 861 | <b>W R Miller.</b> Motivational interviewing: research, practice, and puzzles.. <i>Addictive behaviors</i> . 1996//. 21:835                                                                                                                                                                                                  | Level 2, Form Full Text Screening   |
| 862 | <b>F D Butterfoss, R M Goodman, A Wandersman.</b> Community coalitions for prevention and health promotion: factors predicting satisfaction, participation, and planning.. <i>Health education quarterly</i> . 1996//. 23:65                                                                                                 | Level 1, Form Title/abstract screen |
| 863 | <b>S B Fawcett, A Paine-Andrews, V T Francisco, J A Schultz, K P Richter, R K Lewis, E L Williams, K J Harris, J Y Berkley, J L Fisher.</b> Using empowerment theory in collaborative partnerships for community health and development.. <i>American journal of community psychology</i> . 1995//. 23:677                   | Level 1, Form Title/abstract screen |

|     |                                                                                                                                                                                                                                                     |                                     |
|-----|-----------------------------------------------------------------------------------------------------------------------------------------------------------------------------------------------------------------------------------------------------|-------------------------------------|
| 864 | <b>C E Grella, J J Annon, M D Anglin.</b> Ethnic differences in HIV risk behaviors, self-perceptions, and treatment outcomes among women in methadone maintenance treatment.. <i>Journal of psychoactive drugs.</i> 1995//. 27:421                  | Level 1, Form Title/abstract screen |
| 865 | <b>D M Wing, T Thompson.</b> Causes of alcoholism: a qualitative study of traditional Muscogee (Creek) Indians.. <i>Public health nursing (Boston, Mass.).</i> 1995//. 12:417                                                                       | Level 2, Form Full Text Screening   |
| 866 | <b>R Rosenheck.</b> Substance abuse and the chronically mentally ill: therapeutic alliance and therapeutic limit-setting.. <i>Community mental health journal.</i> 1995//. 31:283                                                                   | Level 1, Form Title/abstract screen |
| 867 | <b>H Chabrol, R Fouraste.</b> [Cognitive-behavioral and systemic approaches to drug addiction among adolescents: value and limitations].. <i>Annales medico-psychologiques.</i> 1995//. 153:240                                                     | Level 1, Form Title/abstract screen |
| 868 | <b>J Finke, L Teusch, M Gastpar.</b> [Psychotherapy in the psychiatric clinic--an empirical study of the expectations of patients].. <i>Psychiatrische Praxis.</i> 1995//. 22:112                                                                   | Level 1, Form Title/abstract screen |
| 869 | <b>T Allen, P Heffington.</b> A case study. The challenges of serving mental health and addictions recovery patients.. <i>PFCA review.</i> 1994//. #volume#:4                                                                                       | Level 1, Form Title/abstract screen |
| 871 | <b>F Shapiro, S Vogelmann-Sine, L F Sine.</b> Eye movement desensitization and reprocessing: treating trauma and substance abuse.. <i>Journal of psychoactive drugs.</i> 1994//. 26:379                                                             | Level 1, Form Title/abstract screen |
| 872 | <b>C C DiClemente, K M Carroll, G J Connors, R M Kadden.</b> Process assessment in treatment matching research.. <i>Journal of studies on alcohol. Supplement.</i> 1994//. 12:156                                                                   | Level 1, Form Title/abstract screen |
| 873 | <b>L Agapetus.</b> Yalom's model. Applied to an outpatient better breathers group.. <i>Journal of psychosocial nursing and mental health services.</i> 1994//. 32:11                                                                                | Level 1, Form Title/abstract screen |
| 874 | <b>H Waitzkin, T Britt.</b> Processing narratives of self-destructive behavior in routine medical encounters: health promotion, disease prevention, and the discourse of health care.. <i>Social science &amp; medicine (1982).</i> 1993//. 36:1121 | Level 1, Form Title/abstract screen |
| 875 | <b>M Olfson, I D Glick, D Mechanic.</b> Inpatient treatment of schizophrenia in general hospitals.. <i>Hospital &amp; community psychiatry.</i> 1993//. 44:40                                                                                       | Level 1, Form Title/abstract screen |
| 877 | <b>B Johnson.</b> Psychoanalysis of a man with active alcoholism.. <i>Journal of substance abuse treatment.</i> 1992//. 9:111                                                                                                                       | Level 1, Form Title/abstract screen |
| 878 | <b>J R Buskirk.</b> Headlock: psychotherapy of a patient with multiple neurological and psychiatric problems.. <i>Bulletin of the Menninger Clinic.</i> 1992//. 56:361                                                                              | Level 1, Form Title/abstract screen |
| 879 | <b>B Spielman.</b> Expanding the boundaries of informed consent: disclosing alcoholism and HIV status to patients.. <i>The American journal of medicine.</i> 1992//. 93:216                                                                         | Level 1, Form Title/abstract screen |
| 880 | <b>S S O'Malley, A J Jaffe, G Chang, R S Schottenfeld, R E Meyer, B Rounsaville.</b> Naltrexone and coping skills therapy for alcohol dependence. A controlled study.. <i>Archives of general psychiatry.</i> 1992//. 49:881                        | Level 1, Form Title/abstract screen |
| 881 | <b>P Lurie, P R Lee.</b> Fifteen solutions to the problems of prescription drug abuse.. <i>Journal of psychoactive drugs.</i> 1991//. 23:349                                                                                                        | Level 1, Form Title/abstract screen |

|     |                                                                                                                                                                                                                                                                 |                                     |
|-----|-----------------------------------------------------------------------------------------------------------------------------------------------------------------------------------------------------------------------------------------------------------------|-------------------------------------|
| 882 | <b>W Pfeiffer, W Feuerlein, E Brenk-Schulte.</b> The motivation of alcohol dependents to undergo treatment.. <i>Drug and alcohol dependence</i> . 1991//. 29:87                                                                                                 | Level 2, Form Full Text Screening   |
| 884 | <b>H J Luderer.</b> [Client-centered self-experience groups in male alcohol-dependent patients].. <i>Psychiatrische Praxis</i> . 1987//. 14:169                                                                                                                 | Level 1, Form Title/abstract screen |
| 885 | <b>J F Clarkin, S W Hurt, J L Crilly.</b> Therapeutic alliance and hospital treatment outcome.. <i>Hospital &amp; community psychiatry</i> . 1987//. 38:871                                                                                                     | Level 1, Form Title/abstract screen |
| 886 | <b>L Wermuth, S Scheidt.</b> Enlisting family support in drug treatment.. <i>Family process</i> . 1986//. 25:25                                                                                                                                                 | Level 1, Form Title/abstract screen |
| 887 | <b>R B Millman.</b> Considerations on the psychotherapy of the substance abuser.. <i>Journal of substance abuse treatment</i> . 1986//. 3:103                                                                                                                   | Level 1, Form Title/abstract screen |
| 888 | <b>J M Ellison, D Jacobs.</b> Emergency psychopharmacology: a review and update.. <i>Annals of emergency medicine</i> . 1986//. 15:962                                                                                                                          | Level 1, Form Title/abstract screen |
| 889 | <b>J D McCarroll.</b> Client-centered treatment for the alcoholic in an ambulatory care setting.. <i>Family &amp; community health</i> . 1985//. 7:26                                                                                                           | Level 2, Form Full Text Screening   |
| 890 | <b>M Jones.</b> Therapeutic communities, old and new.. <i>The American journal of drug and alcohol abuse</i> . 1979//. 6:137                                                                                                                                    | Level 1, Form Title/abstract screen |
| 892 | <b>F W Obitz.</b> Alcoholics' perceptions of selected counseling techniques.. <i>The British journal of addiction to alcohol and other drugs</i> . 1975//. 70:187                                                                                               | Level 1, Form Title/abstract screen |
| 893 | <b>S I Greenspan.</b> The clinical use of operant learning approaches: some complex issues.. <i>The American journal of psychiatry</i> . 1974//. 131:852                                                                                                        | Level 1, Form Title/abstract screen |
| 894 | <b>P R Kilmann, R J Howell.</b> Effects of structure of marathon group therapy and locus of control of therapeutic outcome.. <i>Journal of consulting and clinical psychology</i> . 1974//. 42:912                                                              | Level 1, Form Title/abstract screen |
| 895 | <b>R Kellner.</b> The evidence in favour of psychotherapy.. <i>The British journal of medical psychology</i> . 1967//. 40:341                                                                                                                                   | Level 1, Form Title/abstract screen |
| 896 | <b>S G ALLISON.</b> Nondirective group therapy of alcoholics in a state hospital.. <i>Quarterly journal of studies on alcohol</i> . 1952//. 13:596                                                                                                              | Level 1, Form Title/abstract screen |
| 897 | <b>Edwards S.,Levitzky E.,Molina P.E.,Gunaldo T.P.</b> Interprofessional education (IPE) to equip healthcare professional students for future team-based alcohol use disorder treatment. <i>Alcoholism: Clinical and Experimental Research</i> . 2018//. 42:81A | Level 1, Form Title/abstract screen |
| 898 | <b>Epstein E.E.,McCrary B.S.,Hallgren K.A.</b> Individual versus group female-specific cognitive behavior therapy for alcohol use disorder. <i>Alcoholism: Clinical and Experimental Research</i> . 2018//. 42:294A                                             | Level 1, Form Title/abstract screen |
| 899 | <b>Ludman E.J.,Matson T.,Bobb J.F.,Richards J.E.,Lapham G.T.,Bradley K.A.</b> Alcohol-related nurse care management in primary care: Randomized                                                                                                                 | Level 1, Form Title/abstract        |

|     |                                                                                                                                                                                                                                                                                                                                                                                                      |                                     |
|-----|------------------------------------------------------------------------------------------------------------------------------------------------------------------------------------------------------------------------------------------------------------------------------------------------------------------------------------------------------------------------------------------------------|-------------------------------------|
|     | controlled trial depressive symptom outcomes. <i>Alcoholism: Clinical and Experimental Research</i> . 2018//. 42:264A                                                                                                                                                                                                                                                                                | screen                              |
| 900 | <b>Borelli J.L.,Sohn L.,Wang B.A.,Hong K.,DeCoste C.,Suchman N.E.</b> . Therapist-Client Language Matching: Initial Promise as a Measure of Therapist-Client Relationship Quality. <i>Psychoanalytic Psychology</i> . 2018//. #volume#:#pages#                                                                                                                                                       | Level 2, Form Full Text Screening   |
| 901 | <b>Lowenstein L.M.,Deyter G.M.R.,Nishi S.,Wang T.,Volk R.J.</b> . Shared decision-making conversations and smoking cessation interventions: Critical components of low-dose CT lung cancer screening programs. <i>Translational Lung Cancer Research</i> . 2018//. 7:254                                                                                                                             | Level 1, Form Title/abstract screen |
| 902 | <b>Yedidia M.J.</b> . Competencies for engaging high-needs patients in primary care. <i>Healthcare</i> . 2018//. 6:122                                                                                                                                                                                                                                                                               | Level 1, Form Title/abstract screen |
| 903 | <b>Ferrari M.,Flora N.,Anderson K.K.,Haughton A.,Tuck A.,Archie S.,Kidd S.,McKenzie K.</b> . Gender differences in pathways to care for early psychosis. <i>Early Intervention in Psychiatry</i> . 2018//. 12:355                                                                                                                                                                                    | Level 1, Form Title/abstract screen |
| 904 | <b>Giannitrapani K.,Glassman P.,Azarfar A.,Silveira M.,Midboe A.,Kerns R.D.,Pearlman R.,Becker W.,Lorenz K.</b> . Conducting signature informed consent for opioid therapy in patients with cancer: A qualitative analysis of multidisciplinary provider's perspectives. <i>Journal of General Internal Medicine</i> . 2018//. 33:148                                                                | Level 1, Form Title/abstract screen |
| 907 | <b>Steckowych K.,Smith M.</b> . Lessons learned and real-world challenges of implementing clinical pharmacy services in a primary care office. <i>Journal of the American Pharmacists Association</i> . 2018//. 58:e132                                                                                                                                                                              | Level 1, Form Title/abstract screen |
| 908 | <b>Gurney M.,Shim C.,Hwang S.</b> . APPE OTC registry project: Patient decisions, cost savings, and pharmacy consultation. <i>Journal of the American Pharmacists Association</i> . 2018//. 58:e103                                                                                                                                                                                                  | Level 1, Form Title/abstract screen |
| 909 | <b>Baumann A.,Skirvin J.,Youn R.,Poliskey K.,Ryan V.</b> . Pharmacists' role in an interdisciplinary team-based care approach to the treatment of opioid use disorder at a community health center. <i>Journal of the American Pharmacists Association</i> . 2018//. 58:e174                                                                                                                         | Level 1, Form Title/abstract screen |
| 913 | <b>Boden S.D.</b> . Spinescope. <i>Seminars in Spine Surgery</i> . 2018//. 30:135                                                                                                                                                                                                                                                                                                                    | Level 1, Form Title/abstract screen |
| 917 | <b>Goggin K.,Bradley-Ewing A.,Myers A.L.,Lee B.R.,Hurley E.A.,Delay K.B.,Schlachter S.,Ramphal A.,Pina K.,Yu D.,Weltmer K.,Linnemayr S.,Butler C.C.,Newland J.G.</b> . Protocol for a randomised trial of higher versus lower intensity patient-provider communication interventions to reduce antibiotic misuse in two paediatric ambulatory clinics in the USA. <i>BMJ Open</i> . 2018//. 8:020981 | Level 1, Form Title/abstract screen |
| 918 | <b>Morley J.,Levak S.,Kapoor S.,Ritter M.K.,O'Grady M.,Morgenstern J.,Conigliaro J.</b> . Project reduce: Beyond the brief intervention. building a model for treating alcohol use disorder within a patient centered medical home-early lessons. <i>Journal of General Internal Medicine</i> . 2018//. 33:827                                                                                       | Level 1, Form Title/abstract screen |
| 919 | <b>Conneely A.,Marshall S.,Bristowe K.,McQuillan R.</b> . Qualitative study exploring the experience of homelessness staff working with homeless people with life-limiting illnesses in Dublin, Ireland. <i>Palliative Medicine</i> . 2018//. 32:88                                                                                                                                                  | Level 1, Form Title/abstract screen |
| 920 | <b>Hudson B.F.,Shulman C.,Brophy N.,Kennedy P.,Stone P.</b> . Developing and evaluating a training workshop for hostel staff around supporting homeless                                                                                                                                                                                                                                              | Level 1, Form Title/abstract        |

|     |                                                                                                                                                                                                                                                                                                                                                                                                              |                                     |
|-----|--------------------------------------------------------------------------------------------------------------------------------------------------------------------------------------------------------------------------------------------------------------------------------------------------------------------------------------------------------------------------------------------------------------|-------------------------------------|
|     | people with advanced ill health. <i>Palliative Medicine</i> . 2018//. 32:123                                                                                                                                                                                                                                                                                                                                 | screen                              |
| 921 | <b>Moore K.</b> The perils of the incidentaloma: A case of lung cancer screening gone wrong. <i>Journal of General Internal Medicine</i> . 2018//. 33:642                                                                                                                                                                                                                                                    | Level 1, Form Title/abstract screen |
| 922 | <b>Spacht A.,Tang J.W.,Farnan J.M.,Kostas T.,Arora V.M.,Scheetz M.H.,White S.R.,Press V.G.</b> Engaging pritzker students in inter-professional chronic disease management: Integrating the curriculum and defining value added roles within the recover QI program. <i>Journal of General Internal Medicine</i> . 2018//. 33:703                                                                            | Level 1, Form Title/abstract screen |
| 923 | <b>Schapira M.M.,Rodriquez K.,Kaminstein D.,Chhatre S.,Kravetz J.,Bastian L.A.,Asan O.,Prigge J.,Villegas J.,Hruska K.L.,Karas C.,Shea J.A.,Fraenkel L.</b> Implementation of lung cancer screening decision support in the VA: Where providers and patients thinking converges and diverges. <i>Journal of General Internal Medicine</i> . 2018//. 33:236                                                   | Level 1, Form Title/abstract screen |
| 924 | <b>Soh M.,Schutz K.,Cowan B.J.,Kopelson K.,Seragaki S.,Keenan C.,Gelberg L.,Warde C.</b> Developing and assessing a super huddle for an interprofessional (IP) training program. <i>Journal of General Internal Medicine</i> . 2018//. 33:698                                                                                                                                                                | Level 1, Form Title/abstract screen |
| 925 | <b>Percac-Lima S.,Hodgkin D.,Ashburner J.M.,Pandharipande P.,Park E.R.,Gorton E.,Atlas S.J.</b> Provider perceptions and costs outcomes of a community-health center based patient navigation program for lung cancer screening. <i>Journal of General Internal Medicine</i> . 2018//. 33:316                                                                                                                | Level 1, Form Title/abstract screen |
| 926 | <b>Laks J.,Patel K.,Alford D.P.,Jones S.M.,Armstrong S.E.,Waite K.,Henault L.,Paasche-Orlow M.K.</b> Just sign here? A national survey of opioid treatment agreements for chronic pain management. <i>Journal of General Internal Medicine</i> . 2018//. 33:251                                                                                                                                              | Level 1, Form Title/abstract screen |
| 927 | <b>Jacob R.A.,Paranjape A.</b> Trauma alert! How social complexity contributes to medical complexity. <i>Journal of General Internal Medicine</i> . 2018//. 33:379                                                                                                                                                                                                                                           | Level 1, Form Title/abstract screen |
| 928 | <b>Takler G.B.,DeGrandis F.M.,Montori V.M.,Nagykaldi Z.,Rothberg M.B.</b> Individualizing disease prevention for middle-aged adults: A pilot study. <i>Journal of General Internal Medicine</i> . 2018//. 33:244                                                                                                                                                                                             | Level 1, Form Title/abstract screen |
| 932 | <b>Isenberg S.R.,Maragh-Bass A.C.,Ridgeway K.,Beach M.C.,Knowlton A.R.</b> A qualitative exploration of chronic pain and opioid treatment among HIV patients with drug use disorders. <i>Journal of Opioid Management</i> . 2017//. 13:5                                                                                                                                                                     | Level 1, Form Title/abstract screen |
| 939 | <b>Viron M.</b> Smoke free program at Massachusetts mental health center: A peer-supported approach. <i>Psychiatric Services</i> . 2016//. 67:696                                                                                                                                                                                                                                                            | Level 1, Form Title/abstract screen |
| 942 | <b>Kowalski A.J.,Poongothai S.,Chwastiak L.,Hutcheson M.,Tandon N.,Khadgawat R.,Sridhar G.R.,Aravind S.R.,Sosale B.,Anjana R.M.,Rao D.,Sagar R.,Mehta N.,Narayan K.M.V.,Unutzer J.,Katon W.,Mohan V.,Ali M.K.</b> The INtegrating DEPrEssion and Diabetes treatmENT (INDEPENDENT) study: Design and methods to address mental healthcare gaps in India. <i>Contemporary Clinical Trials</i> . 2017//. 60:113 | Level 1, Form Title/abstract screen |
| 950 | <b>Feng X.,Tan X.,Riley B.,Zheng T.,Bias T.,Sambamoorthi U.</b> Polypharmacy and Multimorbidity among Medicaid Enrollees: A Multistate Analysis. <i>Population Health Management</i> . 2018//. 21:123                                                                                                                                                                                                        | Level 1, Form Title/abstract screen |
| 954 | <b>Kirchhof P.,Benussi S.,Kotecha D.,Ahlsson A.,Atar D.,Casadei B.,Castella M.,Diener H.-C.,Heidbuchel H.,Hendriks J.,Hindricks G.,Manolis A.S.,Oldgren J.,Popescu B.A.,Schotten U.,Van Putte B.,Vardas P.,Agewall</b>                                                                                                                                                                                       | Level 1, Form Title/abstract screen |



|     |                                                                                                                                                                                                                                                                                                                                                                                                                                                                                                                                                                         |                                     |
|-----|-------------------------------------------------------------------------------------------------------------------------------------------------------------------------------------------------------------------------------------------------------------------------------------------------------------------------------------------------------------------------------------------------------------------------------------------------------------------------------------------------------------------------------------------------------------------------|-------------------------------------|
|     | <b>S.,Camm J.,Baron Esquivias G.,Budts W.,Carerj S.,Casselma n F.,Coca A.,De Caterina R.,Deftereos S.,Dobrev D.,Ferro J.M.,Filippatos G.,Fitzsimons D.,Goren ek B.,Guenoun M.,Hohnloser S.H.,Kolh P.,Lip G.Y.H.,Manolis A.,McMurray J.,Ponikowski P.,Rosenhek R.,Ruschitzka F.,Savelieva I.,Sharma S.,Suwalski P.,Tamargo J.L.,Taylor C.J.,Van Gelder I.C.,Voors A.A.,Windecker S.,Zamorano J.L.,Zeppenfeld K.</b> 2016 ESC Guidelines for the management of atrial fibrillation developed in collaboration with EACTS. <i>European Heart Journal</i> . 2016//. 37:2893 |                                     |
| 956 | <b>Danielson E.,Mazurenko O.,Andraka-Christou B.,Dilulio J.,Downs S.,Hurley R.,Harle C.</b> How do primary care clinicians and patients discuss risks, benefits, and goals in chronic opioid therapy?. <i>Journal of Pain</i> . 2018//. 19:S38                                                                                                                                                                                                                                                                                                                          | Level 1, Form Title/abstract screen |
| 959 | <b>O'connor M.K.,Mueller L.,Kwon E.,Drebing C.E.,O'Connor A.A.,Semiatin A.,Wang S.,Daley R.</b> Enhanced vocational rehabilitation for Veterans with mild traumatic brain injury and mental illness: Pilot study. <i>Journal of Rehabilitation Research and Development</i> . 2016//. 53:307                                                                                                                                                                                                                                                                            | Level 1, Form Title/abstract screen |
| 961 | <b>Tucker C.B.</b> Bridging the gap: Increasing the screening for depression among high-risk adolescents. <i>Ochsner Journal</i> . 2018//. 18:e12                                                                                                                                                                                                                                                                                                                                                                                                                       | Level 1, Form Title/abstract screen |
| 965 | <b>Carter B.L.</b> Primary care physician-pharmacist collaborative care model: Strategies for implementation. <i>Pharmacotherapy</i> . 2016//. 36:363                                                                                                                                                                                                                                                                                                                                                                                                                   | Level 1, Form Title/abstract screen |
| 966 | <b>Mazzone P.J.,Silvestri G.A.,Patel S.,Kanne J.P.,Kinsinger L.S.,Wiener R.S.,Soo Hoo G.,Detterbeck F.C.</b> Screening for Lung Cancer: CHEST Guideline and Expert Panel Report. <i>Chest</i> . 2018//. 153:954                                                                                                                                                                                                                                                                                                                                                         | Level 1, Form Title/abstract screen |
| 967 | <b>Peppas I.,Fitchett E.J.A.,Kenworthy W.,Kimkool P.,Fertleman C.R.</b> Designing transformative osces: Lessons from an adolescent smoking cessation station. <i>Archives of Disease in Childhood</i> . 2018//. 103:A76                                                                                                                                                                                                                                                                                                                                                 | Level 1, Form Title/abstract screen |
| 968 | <b>Malhi G.S.,Outhred T.,Hamilton A.,Boyce P.M.,Bryant R.,Fitzgerald P.B.,Lyndon B.,Mulder R.,Murray G.,Porter R.J.,Singh A.B.,Fritz K.</b> Royal australian and New Zealand college of psychiatrists clinical practice guidelines for mood disorders: Major depression summary. <i>Medical Journal of Australia</i> . 2018//. 208:175                                                                                                                                                                                                                                  | Level 1, Form Title/abstract screen |
| 971 | <b>Spattini L.,Mattei G.,Raisi F.,Ferrari S.,Pingani L.,Galeazzi G.M.</b> Efficacy of animal assisted therapy on people with mental disorders: An update on the evidence. <i>Minerva Psichiatrica</i> . 2018//. 59:54                                                                                                                                                                                                                                                                                                                                                   | Level 1, Form Title/abstract screen |
| 973 | <b>Erkmen C.,Mitchell M.</b> Lung cancer screening in a predominantly African-American population. <i>International Journal of Radiation Oncology Biology Physics</i> . 2017//. 98:242                                                                                                                                                                                                                                                                                                                                                                                  | Level 1, Form Title/abstract screen |
| 974 | <b>Dixon L.B.,Holoshitz Y.,Nossel I.</b> Treatment engagement of individuals experiencing mental illness: Review and update. <i>World Psychiatry</i> . 2016//. 15:13                                                                                                                                                                                                                                                                                                                                                                                                    | Level 1, Form Title/abstract screen |
| 976 | <b>Garvey W.T.,Hurley D.L.,Kushner R.F.</b> Patient-centered care of the patient with obesity. <i>Endocrine Practice</i> . 2016//. 22:1                                                                                                                                                                                                                                                                                                                                                                                                                                 | Level 1, Form Title/abstract screen |
| 978 | <b>Dissanayake V.,Dalka E.T.,Koh C.,Bisanzo M.,Brandt R.S.,Erickson T.B.,Chamberlain S.</b> A pilot study on the management and outcomes of self-poisoning in a rural Ugandan Emergency Centre. <i>African Journal of Emergency Medicine</i> . 2018//. 8:25                                                                                                                                                                                                                                                                                                             | Level 1, Form Title/abstract screen |

|      |                                                                                                                                                                                                                                                                                                                                                                                                           |                                     |
|------|-----------------------------------------------------------------------------------------------------------------------------------------------------------------------------------------------------------------------------------------------------------------------------------------------------------------------------------------------------------------------------------------------------------|-------------------------------------|
| 985  | <b>Randhawa S.,Moore R.F.,DiSesa V.,Kaiser L.,Ma G.X.,Jaklitsch M.T.,Erkmen C.P.</b> Role of Thoracic Surgeons in Lung Cancer Screening: Opportune Time for Involvement. <i>Journal of Thoracic Oncology</i> . 2018//. 13:e33                                                                                                                                                                             | Level 1, Form Title/abstract screen |
| 987  | <b>Mazzone P.J.</b> Obstacles to and Solutions for a Successful Lung Cancer Screening Program. <i>Seminars in Respiratory and Critical Care Medicine</i> . 2016//. 37:659                                                                                                                                                                                                                                 | Level 1, Form Title/abstract screen |
| 990  | <b>Garber G.,Petok A.,McLafferty L.,Jangro W.,Bahnsen R.,Vaughan-Briggs C.</b> Collaborative care approach to managing acute psychiatric conditions in patients with cancer. <i>Psycho-Oncology</i> . 2018//. 27:25                                                                                                                                                                                       | Level 1, Form Title/abstract screen |
| 991  | <b>Shin S.,Leslie K.,Carlisle C.,Rosenkranz S.,Abid S.,Tulloch T.</b> Medical complexity and concurrent disorders in adolescents. <i>Journal of Adolescent Health</i> . 2018//. 62:S128                                                                                                                                                                                                                   | Level 1, Form Title/abstract screen |
| 993  | <b>Jacobson F.L.,Jaklitsch M.T.</b> Computed Tomography Scanning for Early Detection of Lung Cancer. <i>Annual Review of Medicine</i> . 2018//. 69:235                                                                                                                                                                                                                                                    | Level 1, Form Title/abstract screen |
| 995  | <b>Carson N.J.,Katz A.M.,Alegria M.</b> How patients and clinicians make meaning of physical suffering in mental health evaluations. <i>Transcultural Psychiatry</i> . 2016//. 53:595                                                                                                                                                                                                                     | Level 1, Form Title/abstract screen |
| 996  | <b>Irena A.,Reid K.,Battiola R.</b> Bias in the eyes of resident physicians. <i>Wisconsin Medical Journal</i> . 2017//. 116:269                                                                                                                                                                                                                                                                           | Level 1, Form Title/abstract screen |
| 999  | <b>Jansson I.,Fors A.,Ekman I.,Ulin K.</b> Documentation of person-centred health plans for patients with acute coronary syndrome. <i>European Journal of Cardiovascular Nursing</i> . 2018//. 17:114                                                                                                                                                                                                     | Level 1, Form Title/abstract screen |
| 1003 | <b>Portacolone E.,Covinsky K.,Johnson J.,Rubinstein R.,Halpern J.</b> The perspective of people with cognitive impairment on therapeutic alliances: A case study. <i>Alzheimer's and Dementia</i> . 2017//. 13:P489                                                                                                                                                                                       | Level 1, Form Title/abstract screen |
| 1005 | <b>Castillo E.G.,Shaner R.,Tang L.,Chung B.,Jones F.,Whittington Y.,Miranda J.,Wells K.B.</b> Improving depression care for adults with serious mental illness in underresourced areas: Community coalitions versus technical support. <i>Psychiatric Services</i> . 2018//. 69:195                                                                                                                       | Level 1, Form Title/abstract screen |
| 1013 | <b>Balekian A.A.,Tanner N.T.,Fisher J.M.,Silvestri G.A.,Gould M.K.</b> Factors associated with a positive baseline screening exam result in the national lung screening trial. <i>Annals of the American Thoracic Society</i> . 2016//. 13:1568                                                                                                                                                           | Level 1, Form Title/abstract screen |
| 1020 | <b>Copeland A.,Criswell A.</b> The primary care provider role in the us screening context: Current practices and strategies for physician engagement. <i>Journal of Thoracic Oncology</i> . 2017//. 12:S2170                                                                                                                                                                                              | Level 1, Form Title/abstract screen |
| 1021 | <b>Fathi J.</b> Communicating complex issues simply: Pivotal role of nursing in lung cancer screening. <i>Journal of Thoracic Oncology</i> . 2017//. 12:S1743                                                                                                                                                                                                                                             | Level 1, Form Title/abstract screen |
| 1023 | <b>Henderson J.L.,Cheung A.,Cleverley K.,Chaim G.,Moretti M.E.,De Oliveira C.,Hawke L.D.,Willan A.R.,O'Brien D.,Heffernan O.,Herzog T.,Courey L.,McDonald H.,Grant E.,Szatmari P.</b> Integrated collaborative care teams to enhance service delivery to youth with mental health and substance use challenges: Protocol for a pragmatic randomised controlled trial. <i>BMJ Open</i> . 2017//. 7:e014080 | Level 1, Form Title/abstract screen |
| 1028 | <b>Ahn M.S.</b> Beyond the prescription pad: Psychotherapy interventions for parents/caregivers of youth with serious mental illnesses and treatment nonadherence. <i>Journal of the American Academy of Child and Adolescent</i>                                                                                                                                                                         | Level 1, Form Title/abstract screen |

|      |                                                                                                                                                                                                                                                                                                                                                          |                                     |
|------|----------------------------------------------------------------------------------------------------------------------------------------------------------------------------------------------------------------------------------------------------------------------------------------------------------------------------------------------------------|-------------------------------------|
|      | <i>Psychiatry</i> . 2017//. 56:S23                                                                                                                                                                                                                                                                                                                       |                                     |
| 1029 | <b>Rackley S.J.</b> . Collaborative care for adolescent depression: The Mayo Clinic experience. <i>Journal of the American Academy of Child and Adolescent Psychiatry</i> . 2017//. 56:S105                                                                                                                                                              | Level 1, Form Title/abstract screen |
| 1030 | <b>Al-Mateen C.S.</b> . Unconscious bias, microaggressions, and health. <i>Journal of the American Academy of Child and Adolescent Psychiatry</i> . 2017//. 56:S76                                                                                                                                                                                       | Level 1, Form Title/abstract screen |
| 1031 | <b>Krampe H.,Stawicki S.,Ribbe K.,Wagner T.,Bartels C.,Kroener-Herwig B.,Ehrenreich H.</b> . Development of an outcome prediction measure for alcoholism therapy by multimodal monitoring of treatment processes. <i>Journal of Psychiatric Research</i> . 2008//. 43:30                                                                                 | Level 1, Form Title/abstract screen |
| 1037 | <b>Kuerbis A.,Houser J.,Levak S.,Shao S.,Morgenstern J.</b> . Exploration of treatment matching of problem drinker characteristics to motivational interviewing and non-directive client-centered psychotherapy. <i>Journal of Substance Abuse Treatment</i> . 2018//. 86:9                                                                              | Level 1, Form Title/abstract screen |
| 1042 | <b>Ravi A.,Pfeiffer M.R.,Rosner Z.,Shea J.A.</b> . Trafficking and Trauma: Insight and Advice for the Healthcare System from Sex-trafficked Women Incarcerated on Rikers Island. <i>Medical Care</i> . 2017//. 55:1017                                                                                                                                   | Level 1, Form Title/abstract screen |
| 1043 | <b>Gilbert C.R.,Ely R.,Fathi J.T.,Louie B.E.,Wilshire C.L.,Modin H.,Aye R.W.,Farivar A.S.,Vallieres E.,Gorden J.A.</b> . The economic impact of a nurse practitioner-directed lung cancer screening, incidental pulmonary nodule, and tobacco-cessation clinic. <i>Journal of Thoracic and Cardiovascular Surgery</i> . 2018//. 155:416                  | Level 1, Form Title/abstract screen |
| 1044 | <b>Bristow B.,Lewis D.</b> . Electronic smoking cessation documentation in an ambulatory cancer centre: Development and implementation. <i>Journal of Medical Imaging and Radiation Sciences</i> . 2015//. 46:S24                                                                                                                                        | Level 1, Form Title/abstract screen |
| 1045 | <b>Plevinsky J.,Miller S.,Maddux M.,Fishman L.,Noe J.,Kahn S.,Greenley R.</b> . Substance use and self-management in college students with inflammatory bowel diseases (IBD). <i>Journal of Pediatric Gastroenterology and Nutrition</i> . 2017//. 65:S153                                                                                               | Level 1, Form Title/abstract screen |
| 1049 | <b>Sairenji T.,Collins K.L.,Evans D.V.</b> . An Update on Inflammatory Bowel Disease. <i>Primary Care - Clinics in Office Practice</i> . 2017//. 44:673                                                                                                                                                                                                  | Level 1, Form Title/abstract screen |
| 1051 | <b>Orkaby A.R.,Rich M.W.</b> . Cardiovascular Screening and Primary Prevention in Older Adults. <i>Clinics in Geriatric Medicine</i> . 2018//. 34:81                                                                                                                                                                                                     | Level 1, Form Title/abstract screen |
| 1052 | <b>Oliva E.M.,Christopher M.L.D.,Wells D.,Bounthavong M.,Harvey M.,Himstreet J.,Emmendorfer T.,Valentino M.,Franchi M.,Goodman F.,Trafton J.A.</b> . Opioid overdose education and naloxone distribution: Development of the Veterans Health Administration's national program. <i>Journal of the American Pharmacists Association</i> . 2017//. 57:S168 | Level 1, Form Title/abstract screen |
| 1053 | <b>Erkmen C.P.,Ma G.X.,Sferra S.R.</b> . Novel use of an electronic medical record to monitor performance of a lung cancer screening program. <i>Journal of Thoracic Oncology</i> . 2017//. 12:S1549                                                                                                                                                     | Level 1, Form Title/abstract screen |
| 1054 | <b>Moore R.,Sferra S.R.,Kaiser L.R.,DiSesa V.J.,Ma G.X.,Erkmen C.P.</b> . Implementation of lung cancer screening with quality metrics in a diverse urban population. <i>Journal of the American College of Surgeons</i> . 2017//. 225:S120                                                                                                              | Level 1, Form Title/abstract screen |
| 1056 | <b>Andreasson S.B.</b> . Tackling alcohol use: Screening, target group, and patient centred care. <i>BMJ (Online)</i> . 2017//. 356:j1119                                                                                                                                                                                                                | Level 1, Form Title/abstract        |

|      |                                                                                                                                                                                                                                                                                                                                                                                                                                                                                           |                                           |
|------|-------------------------------------------------------------------------------------------------------------------------------------------------------------------------------------------------------------------------------------------------------------------------------------------------------------------------------------------------------------------------------------------------------------------------------------------------------------------------------------------|-------------------------------------------|
|      |                                                                                                                                                                                                                                                                                                                                                                                                                                                                                           | screen                                    |
| 1067 | <b>Miranda L.S.,Datta S.,Melzer A.C.,Wiener R.S.,Davis J.M.,Tong B.C.,Golden S.E.,Slatore C.G.</b> . Rationale and design of the lung cancer screening implementation: Evaluation of patient-centered care study. <i>Annals of the American Thoracic Society</i> . 2017//. 14:1581                                                                                                                                                                                                        | Level 1, Form<br>Title/abstract<br>screen |
| 1068 | <b>Moyers T.B.,Houck J.,Glynn L.H.,Hallgren K.A.,Manuel J.K.</b> . A randomized controlled trial to influence client language in substance use disorder treatment. <i>Drug and Alcohol Dependence</i> . 2017//. 172:43                                                                                                                                                                                                                                                                    | Level 1, Form<br>Title/abstract<br>screen |
| 1071 | <b>Johnson K.A.T.,Seitz-Brown C.,Anderson K.,Degeorge D.,Blevins E.,Daughters S.B.</b> . 1-Year post treatment outcomes from a RCT of a behavioral activation treatment for substance use and depression. <i>Drug and Alcohol Dependence</i> . 2017//. 171:e96                                                                                                                                                                                                                            | Level 1, Form<br>Title/abstract<br>screen |
| 1072 | <b>Kelly S.M.,O'Grady K.E.,Gryczynski J.,Mitchell S.G.,Jaffe J.H.,Schwartz R.P.</b> . Methadone patients in patient-centered treatment: One-year arrest data. <i>Drug and Alcohol Dependence</i> . 2017//. 171:e100                                                                                                                                                                                                                                                                       | Level 2, Form<br>Full Text<br>Screening   |
| 1074 | <b>Mann K.,Aubin H.-J.,Charlet K.,Witkiewitz K.</b> . Can reduced drinking be a viable goal for alcohol dependent patients?. <i>World Psychiatry</i> . 2017//. 16:325                                                                                                                                                                                                                                                                                                                     | Level 1, Form<br>Title/abstract<br>screen |
| 1075 | <b>Howard H.,Clark K.</b> . Interprofessional-shared decision making for pregnant women with opioid use: Results from a provider training. <i>Current Women's Health Reviews</i> . 2017//. 13:121                                                                                                                                                                                                                                                                                         | Level 1, Form<br>Title/abstract<br>screen |
| 1077 | <b>Grad R.,Legare F.,Bell N.R.,Dickinson J.A.,Singh H.,Moore A.E.,Kasperavicius D.,Kretschmer K.L.</b> . Shared decision making in preventive health care: What it is; What. <i>Canadian Family Physician</i> . 2017//. 63:#pages#                                                                                                                                                                                                                                                        | Level 1, Form<br>Title/abstract<br>screen |
| 1078 | <b>Michaud G.C.,Channick C.L.,Caplan-Shaw C.,Iaccarino J.M.,Slatore C.G.,Bade B.,Tanner N.,Robitaille C.,Gonzalez A.V.,Goudie E.,Liberman M.,Sharma D.,Shojaee S.,Merrick C.M.,Maldonado F.,Nguyen Q.L.,Rivera-Lebron B.,Poston J.T.</b> . ATS Core Curriculum 2017: Part IV. Adult pulmonary medicine series editor: Jason T. Poston Part IV Editors: Gaetane C. Michaud, Colleen L. Channick, and Caralee Caplan-Shaw. <i>Annals of the American Thoracic Society</i> . 2017//. 14:S196 | Level 1, Form<br>Title/abstract<br>screen |
| 1083 | <b>Dowrick C.</b> . Update on advances in psychiatric treatment in primary care. <i>BJ Psych Advances</i> . 2016//. 22:99                                                                                                                                                                                                                                                                                                                                                                 | Level 1, Form<br>Title/abstract<br>screen |
| 1084 | <b>Young-Hyman D.,De Groot M.,Hill-Briggs F.,Gonzalez J.,Hood K.,Peyrot M.</b> . Psychosocial care for people with diabetes: A position statement of the American Diabetes Association. <i>Diabetes care</i> 2016;39:2126-2140. <i>Diabetes Care</i> . 2017//. 40:e131                                                                                                                                                                                                                    | Level 1, Form<br>Title/abstract<br>screen |
| 1088 | <b>Clavisi O.,Sabanovic H.,Harris B.,Bywaters L.</b> . Attitudes and beliefs of opioid medication among patients with musculoskeletal pain. <i>Internal Medicine Journal</i> . 2017//. 47:18                                                                                                                                                                                                                                                                                              | Level 1, Form<br>Title/abstract<br>screen |
| 1090 | <b>Santos N.,Chin C.</b> . Navigating the complexities of patients with substance use disorders through stem cell transplant: The role of the social worker. <i>Journal of Psychosocial Oncology</i> . 2016//. 34:140                                                                                                                                                                                                                                                                     | Level 1, Form<br>Title/abstract<br>screen |
| 1091 | <b>Villafuerte D.,Mangat M.,Malave A.</b> . Abrikosoff's wheeze. <i>American Journal of Respiratory and Critical Care Medicine</i> . 2017//. 195:#pages#                                                                                                                                                                                                                                                                                                                                  | Level 1, Form<br>Title/abstract<br>screen |
| 1092 | <b>Fathi J.T.,Blanshan S.C.,Wilson A.K.,Wilshire C.L.,Gilbert C.R.,Aye</b>                                                                                                                                                                                                                                                                                                                                                                                                                | Level 2, Form                             |

|      |                                                                                                                                                                                                                                                                                                                        |                                           |
|------|------------------------------------------------------------------------------------------------------------------------------------------------------------------------------------------------------------------------------------------------------------------------------------------------------------------------|-------------------------------------------|
|      | <b>R.W.,Farivar A.S.,Louie B.E.,Vallieres E.,Gorden J.A.</b> . Integrating smoking cessation counseling and treatment in a lung cancer screening program: An effective approach to long-term smoking cessation success. <i>American Journal of Respiratory and Critical Care Medicine</i> . 2017//. 195:#pages#        | Full Text<br>Screening                    |
| 1093 | <b>Landon C.,Gallardo K.</b> . COPD access to community health - Catch smoking cessation in severely mentally ill patients. <i>American Journal of Respiratory and Critical Care Medicine</i> . 2017//. 195:#pages#                                                                                                    | Level 1, Form<br>Title/abstract<br>screen |
| 1094 | <b>Zeliadt S.,Greene P.,Krebs P.,Klein D.,Ko B.,Swanson L.,Todd K.,Feemster L.C.,Au D.H.,Reinke L.F.,Heffner J.</b> . Knowledge gaps and biased risk perceptions among current smokers participating in lung cancer screening. <i>American Journal of Respiratory and Critical Care Medicine</i> . 2017//. 195:#pages# | Level 1, Form<br>Title/abstract<br>screen |
| 1095 | <b>Nicklas D.,Lane J.L.,Hanson J.,Owens J.,Treitz M.</b> . Using Digital Stories to Reflect on the Culture of Overuse, Misuse, and Underuse in Medicine and Enhance the Patient-Provider Relationship. <i>Academic Pediatrics</i> . 2017//. 17:694                                                                     | Level 1, Form<br>Title/abstract<br>screen |
| 1096 | <b>Hoffman R.M.,Sanchez R.</b> . Lung Cancer Screening. <i>Medical Clinics of North America</i> . 2017//. 101:769                                                                                                                                                                                                      | Level 1, Form<br>Title/abstract<br>screen |
| 1097 | <b>Spithoff S.,Kahan M.,Hardy K.,Clarke S.,Mukerji G.,Robertson A.,Pripstein L.,Molnar L.,Krishnamurthy A.,Lamba W.</b> . Pilot feasibility study of a primary care and addiction medicine collaborative care model SUN:SHARE. <i>Canadian Family Physician</i> . 2016//. 62:S35                                       | Level 1, Form<br>Title/abstract<br>screen |
| 1098 | <b>Rabien A.,Price M.</b> . Development of a clinical decision support tool for the primary prevention of cardiovascular disease. <i>Canadian Family Physician</i> . 2015//. 61:S2                                                                                                                                     | Level 1, Form<br>Title/abstract<br>screen |
| 1099 | <b>Li G.,Thabane L.,Delate T.,Witt D.M.,Levine M.A.H.,Cheng J.,Holbrook A.</b> . Can we predict individual combined benefit and harm of therapy? Warfarin therapy for atrial fibrillation as a test case. <i>PLoS ONE</i> . 2016//. 11:e0160713                                                                        | Level 1, Form<br>Title/abstract<br>screen |
| 1100 | <b>Baumann M.,Tchicaya A.,Lorentz N.,Le Bihan E.</b> . Impact of patients' communication with the medical practitioners, on their adherence declared to preventive behaviours, five years after a coronary angiography, in Luxembourg. <i>PLoS ONE</i> . 2016//. 11:e0157321                                           | Level 1, Form<br>Title/abstract<br>screen |
| 1102 | <b>Mehta P.,Brown A.,Chung B.,Jones F.,Tang L.,Gilmore J.,Miranda J.,Wells K.</b> . Community partners in care: 6-month outcomes of two quality improvement depression care interventions in male participants. <i>Ethnicity and Disease</i> . 2017//. 27:223                                                          | Level 1, Form<br>Title/abstract<br>screen |
| 1103 | <b>Inzucchi S.E.,Bergenstal R.M.,Buse J.B.,Diamant M.,Ferrannini E.,Nauck M.,Peters A.L.,Tsapas A.,Wender R.,Matthews D.R.</b> . Management of hyperglycemia in type 2 diabetes: A patient-centered approach. <i>Diabetes Care</i> . 2012//. 35:1364                                                                   | Level 1, Form<br>Title/abstract<br>screen |
| 1106 | <b>Percac-Lima S.,Ashburner J.M.,Rigotti N.,Park E.R.,Chang Y.,Atlas S.J.</b> . Lung cancer screening patient navigation for current smokers in community health centers: A randomized controlled trial. <i>Journal of Clinical Oncology</i> . 2017//. 35:#pages#                                                      | Level 1, Form<br>Title/abstract<br>screen |
| 1107 | <b>Schneiderhan J.,Clauw D.,Schwenk T.L.</b> . Primary care of patients with chronic pain. <i>JAMA - Journal of the American Medical Association</i> . 2017//. 317:2367                                                                                                                                                | Level 1, Form<br>Title/abstract<br>screen |
| 1108 | <b>Padwa H.,Ling W.,Antonini V.P.,Grossman J.</b> . Development of a patient-centered research agenda for patients with opioid use disorders. <i>Journal of</i>                                                                                                                                                        | Level 2, Form<br>Full Text                |

|      |                                                                                                                                                                                                                                                      |                                     |
|------|------------------------------------------------------------------------------------------------------------------------------------------------------------------------------------------------------------------------------------------------------|-------------------------------------|
|      | <i>Neuroimmune Pharmacology</i> . 2017//. 12:S109                                                                                                                                                                                                    | Screening                           |
| 1109 | <b>Garde E.L.,Manning V.,Lubman D.I.</b> . Characteristics of clients currently accessing a national online alcohol and drug counselling service. <i>Australasian Psychiatry</i> . 2017//. 25:250                                                    | Level 1, Form Title/abstract screen |
| 1110 | <b>Blyer K.,Hulton L.</b> . College students, shared decision making, and the appropriate use of antibiotics for respiratory tract infections: A systematic literature review. <i>Journal of American college health : J of ACH</i> . 2016//. 64:334 | Level 1, Form Title/abstract screen |
| 1113 | <b>Mailis-Gagnon A.,Nicholson K.,Chaparro L.</b> . Analysis of complaints to a tertiary care pain clinic over a nine-year period. <i>Pain Research and Management</i> . 2010//. 15:17                                                                | Level 1, Form Title/abstract screen |
| 1114 | <b>Pignone M.P.,Bibbins-Domingo K.</b> . Update on Key Clinical Preventive Services for Adults. <i>Medical Clinics of North America</i> . 2017//. 101:#pages#                                                                                        | Level 1, Form Title/abstract screen |
| 1117 | <b>Ryan P.,Johnson B.,Rathbun J.,Woo K.</b> . There is still time to avoid the 4% CMS payment penalty. <i>Journal of Vascular Surgery: Venous and Lymphatic Disorders</i> . 2017//. 5:606                                                            | Level 1, Form Title/abstract screen |
| 1121 | <b>Srinivasa S.R.</b> . Use of yoga as a therapy for substance abuse treatment. <i>Alcoholism: Clinical and Experimental Research</i> . 2017//. 41:363A                                                                                              | Level 1, Form Title/abstract screen |
| 1122 | <b>Morgenstern J.,Kuerbis A.,Levak S.,Amrhein P.</b> . Dismantling motivational interviewing (MI) for problem drinkers. <i>Alcoholism: Clinical and Experimental Research</i> . 2017//. 41:275A                                                      | Level 2, Form Full Text Screening   |
| 1123 | <b>Erkmen C.,Sferra S.,Goldman C.,Kaiser L.,Disesa V.,Ma G.</b> . Smoking patterns in a predominantly African American population undergoing lung cancer screening. <i>Journal of Thoracic Oncology</i> . 2017//. 12:S572                            | Level 1, Form Title/abstract screen |
| 1124 | <b>Christensen J.,Garst J.,Wahidi M.,Hogan C.,Crittenden H.,Bruce S.,D'Amico T.,Tong B.</b> . A structured lung cancer screening program facilitates patient and provider compliance. <i>Journal of Thoracic Oncology</i> . 2017//. 12:S572          | Level 1, Form Title/abstract screen |
| 1125 | <b>Henderson L.,Jones L.,Benefield T.,Reuland D.,Brenner A.,Molina P.,Rivera M.</b> . Appropriateness of lung cancer screening with low dose computed tomography. <i>Journal of Thoracic Oncology</i> . 2017//. 12:S565                              | Level 1, Form Title/abstract screen |
| 1129 | <b>Yuan A.S.,Siggins C.A.,Erekson E.</b> . Perioperative Management of Older Women in Urogynecologic Surgery. <i>Current Geriatrics Reports</i> . 2017//. 6:43                                                                                       | Level 1, Form Title/abstract screen |
| 1133 | <b>Shukla A.,McQueen P.,Alqadri S.,Govindarajan R.</b> . Compassionate Neurological Care OSCEA Primer for Teaching Patient Centered Care in Neurology Clerkship. <i>Neurology</i> . 2017//. 88:#pages#                                               | Level 1, Form Title/abstract screen |
| 1135 | <b>Tzelepis F.,Paul C.L.,Williams C.M.,Gilligan C.,Regan T.,Daly J.,Hodder R.K.,Wiggers J.</b> . Real-time video counselling for smoking cessation. <i>Cochrane Database of Systematic Reviews</i> . 2017//. 2017:CD012659                           | Level 1, Form Title/abstract screen |
| 1136 | <b>Kuo E.J.,Owen M.,Chok S.,Salman A.,Lema J.,Kalantari H.,Hassen G.</b> . Predicting different kinds of utilization patterns by frequent users in the emergency department. <i>Annals of Emergency Medicine</i> . 2016//. 68:S123                   | Level 1, Form Title/abstract screen |
| 1137 | <b>Redberg R.F.,Katz M.H.</b> . Statins for primary prevention: The debate is intense, but the data are weak. <i>JAMA - Journal of the American Medical Association</i> . 2016//. 316:1979                                                           | Level 1, Form Title/abstract screen |
| 1153 | <b>Oral R.,Ramirez M.,Coohy C.,Nakada S.,Walz A.,Kuntz A.,Benoit</b>                                                                                                                                                                                 | Level 1, Form                       |

|      |                                                                                                                                                                                                                                                                                                                                                                              |                                     |
|------|------------------------------------------------------------------------------------------------------------------------------------------------------------------------------------------------------------------------------------------------------------------------------------------------------------------------------------------------------------------------------|-------------------------------------|
|      | <b>J.,Peek-Asa C.</b> . Adverse childhood experiences and trauma informed care: The future of health care. <i>Pediatric Research</i> . 2016//. 79:227                                                                                                                                                                                                                        | Title/abstract screen               |
| 1158 | <b>Beharie N.,Lennon M.C.,McKay M.M.</b> . Assessing the Relationship between the Perceived Shelter Environment and Mental Health among Homeless Caregivers. <i>Behavioral Medicine</i> . 2015//. 41:107                                                                                                                                                                     | Level 1, Form Title/abstract screen |
| 1159 | <b>St Clair M.C.,Neufeld S.,Jones P.B.,Fonagy P.,Bullmore E.T.,Dolan R.J.,Moutoussis M.,Toseeb U.,Goodyer I.M.</b> . Characterising the latent structure and organisation of self-reported thoughts, feelings and behaviours in adolescents and young adults. <i>PLoS ONE</i> . 2017//. 12:e0175381                                                                          | Level 1, Form Title/abstract screen |
| 1167 | <b>Chung B.,Ngo V.K.,Ong M.K.,Pulido E.,Jones F.,Gilmore J.,Stoker-Mtume N.,Johnson M.,Tang L.,Wells K.B.,Sherbourne C.,Miranda J.</b> . Participation in training for depression care quality improvement: A randomized trial of community engagement or technical support. <i>Psychiatric Services</i> . 2015//. 66:831                                                    | Level 1, Form Title/abstract screen |
| 1168 | <b>Rose G.L.,Guth S.E.,Badger G.J.,Plante D.A.,Fazzino T.L.,Helzer J.E.</b> . Brief intervention for heavy drinking in primary care: Role of patient initiation. <i>Journal of Addiction Medicine</i> . 2015//. 9:368                                                                                                                                                        | Level 1, Form Title/abstract screen |
| 1169 | <b>Percac-Lima S.,Ashburner J.M.,Rigotti N.A.,Park E.R.,Atlas S.J.</b> . Patient navigation program for lung cancer screening in community health centers. <i>Journal of General Internal Medicine</i> . 2017//. 32:S782                                                                                                                                                     | Level 1, Form Title/abstract screen |
| 1170 | <b>Lowenstein M.,Vijayaraghavan M.,Burke N.J.,Karliner L.S.,Peters M.,Kaplan C.P.</b> . It's complicated: Patient and physician attitudes towards lung cancer screening implementation. <i>Journal of General Internal Medicine</i> . 2017//. 32:S237                                                                                                                        | Level 1, Form Title/abstract screen |
| 1171 | <b>Hemming P.,Greenblatt L.,Revels J.</b> . Identifying behavioral health competencies for internal medicine residents: Qualitative interviews with residents, faculty and behavioral health clinicians at a clinic with integrated behavioral health. <i>Journal of General Internal Medicine</i> . 2017//. 32:S211                                                         | Level 1, Form Title/abstract screen |
| 1172 | <b>Bekelman D.,Allen L.,Hattler B.,Havranek E.P.,Fairclough D.,McBryde C.F.,Meek P.</b> . Collaborative care to alleviate symptoms and adjust to illness (CASA): Primary efficacy results from the casa randomized clinical trial of a palliative symptom and psychosocial care intervention in heart failure. <i>Journal of General Internal Medicine</i> . 2017//. 32:S141 | Level 1, Form Title/abstract screen |
| 1173 | <b>Mo S.S.,Hu Y.E.,Nash T.R.,Feingold S.B.</b> . Tracking patient reported outcome measures in a student-faculty collaborative clinic. <i>Journal of General Internal Medicine</i> . 2017//. 32:S357                                                                                                                                                                         | Level 1, Form Title/abstract screen |
| 1174 | <b>Weinstein E.,Mallano D.,Botnick L.,Hamblin C.,Delgado M.</b> . Preventing avoidable visits and inpatient admissions in high risk patients. <i>Journal of General Internal Medicine</i> . 2017//. 32:S788                                                                                                                                                                  | Level 1, Form Title/abstract screen |
| 1175 | <b>Roche M.S.</b> . The long road home. <i>Journal of General Internal Medicine</i> . 2017//. 32:S619                                                                                                                                                                                                                                                                        | Level 1, Form Title/abstract screen |
| 1178 | <b>Farmer A.D.,Gallagher J.,Bruckner-Holt C.,Aziz Q.</b> . Narcotic bowel syndrome. <i>The Lancet Gastroenterology and Hepatology</i> . 2017//. 2:361                                                                                                                                                                                                                        | Level 1, Form Title/abstract screen |
| 1179 | <b>Roncero C.,Szerman N.,Teran A.,Pino C.,Vazquez J.M.,Velasco E.,Garcia-Dorado M.,Casas M.</b> . Professionals' perception on the management of patients with dual disorders. <i>Patient Preference and Adherence</i> . 2016//. 10:1855                                                                                                                                     | Level 1, Form Title/abstract screen |
| 1189 | <b>Samson P.,Waters E.A.,Meyers B.,Politi M.C.</b> . Shared Decision Making and                                                                                                                                                                                                                                                                                              | Level 1, Form                       |

|      |                                                                                                                                                                                                                                                                                                                                                       |                                     |
|------|-------------------------------------------------------------------------------------------------------------------------------------------------------------------------------------------------------------------------------------------------------------------------------------------------------------------------------------------------------|-------------------------------------|
|      | Effective Risk Communication in the High-Risk Patient with Operable Stage i Non-Small Cell Lung Cancer. <i>Annals of Thoracic Surgery</i> . 2016//. 101:2049                                                                                                                                                                                          | Title/abstract screen               |
| 1190 | <b>Van Den Heuvel J.,Groenhof K.,Franx A.,Lely T.,Bekker M.</b> E-Health: The next generation obstetrical care. <i>BJOG: An International Journal of Obstetrics and Gynaecology</i> . 2017//. 124:147                                                                                                                                                 | Level 1, Form Title/abstract screen |
| 1191 | <b>Gonzalez K.F.,Meyers S.,Portelli-Gupta J.,Valentine A.,Brick D.,Matthews M.,Suzuki J.</b> Undergraduate-level health coaches as volunteers to assist with office-based opioid treatment with buprenorphine. <i>American Journal on Addictions</i> . 2017//. 26:285                                                                                 | Level 1, Form Title/abstract screen |
| 1192 | <b>Bisaga A.</b> Integrating MAT into systems based practice and innovative collaborative care models, emphasizing data from vermont hub and Spoke System. <i>American Journal on Addictions</i> . 2017//. 26:235                                                                                                                                     | Level 1, Form Title/abstract screen |
| 1193 | <b>Edinger J.D.,Grubber J.,Ulmer C.,Zervakis J.,Olsen M.</b> A Collaborative paradigm for improving management of sleep disorders in primary care: A randomized clinical trial. <i>Sleep</i> . 2016//. 39:237                                                                                                                                         | Level 1, Form Title/abstract screen |
| 1194 | <b>Lewandowski A.N.,Skillings J.L.</b> Who gets a lung transplant? Assessing the psychosocial decision-making process for transplant listing. <i>Global Cardiology Science and Practice</i> . 2016//. 2016:26                                                                                                                                         | Level 1, Form Title/abstract screen |
| 1200 | <b>Barnicot K.,Gonzalez R.,McCabe R.,Priebe S.</b> Skills use and common treatment processes in dialectical behaviour therapy for borderline personality disorder. <i>Journal of Behavior Therapy and Experimental Psychiatry</i> . 2016//. 52:147                                                                                                    | Level 1, Form Title/abstract screen |
| 1201 | <b>Arnow B.A.,Steidtmann D.,Blasey C.,Manber R.,Constantino M.J.,Klein D.N.,Markowitz J.C.,Rothbaum B.O.,Thase M.E.,Fisher A.J.,Kocsis J.H.</b> The relationship between the therapeutic alliance and treatment outcome in two distinct psychotherapies for chronic depression. <i>Journal of Consulting and Clinical Psychology</i> . 2013//. 81:627 | Level 1, Form Title/abstract screen |
| 1202 | <b>Butow P.,Sharpe L.</b> The impact of communication on adherence in pain management. <i>Pain</i> . 2013//. 154:S101                                                                                                                                                                                                                                 | Level 1, Form Title/abstract screen |
| 1203 | <b>Pressley J.,Smith R.</b> No Ordinary Life: Complex Narratives of Trauma and Resilience in Under-Resourced Communities. <i>Journal of Aggression, Maltreatment and Trauma</i> . 2017//. 26:137                                                                                                                                                      | Level 1, Form Title/abstract screen |
| 1207 | <b>Ghitza U.E.</b> Commentary: Addictions neuroclinical assessment: A neuroscience-based framework for addictive disorders. <i>Frontiers in Psychiatry</i> . 2017//. 8:2                                                                                                                                                                              | Level 1, Form Title/abstract screen |
| 1208 | <b>Munoz R.T.,Fox M.D.,Brahm N.,McIntosh H.C.</b> The 'treatment' effect of illicit drug use on the relationship between childhood trauma and perceptions of health among a homeless sample. <i>Journal of Pharmacy Practice</i> . 2016//. 29:286                                                                                                     | Level 1, Form Title/abstract screen |
| 1209 | <b>McCarthy C.,Bateman M.T.,Wagner M.</b> Impact of a clinical pharmacist-led seminar series on primary care provider knowledge of psychotropic medications. <i>Journal of Pharmacy Practice</i> . 2016//. 29:309                                                                                                                                     | Level 1, Form Title/abstract screen |
| 1212 | <b>Uliaszek A.A.,Rashid T.,Williams G.E.,Gulamani T.</b> Group therapy for university students: A randomized control trial of dialectical behavior therapy and positive psychotherapy. <i>Behaviour Research and Therapy</i> . 2016//. 77:78                                                                                                          | Level 1, Form Title/abstract screen |
| 1216 | <b>Henry S.G.,Holt Z.B.</b> Frustrated Patients and Fearful Physicians. <i>Journal of General Internal Medicine</i> . 2017//. 32:148                                                                                                                                                                                                                  | Level 1, Form Title/abstract screen |



|      |                                                                                                                                                                                                                                                                                                    |                                     |
|------|----------------------------------------------------------------------------------------------------------------------------------------------------------------------------------------------------------------------------------------------------------------------------------------------------|-------------------------------------|
| 1217 | <b>Garcia Fernandez S.</b> Adherence to antipsychotic medication in bipolar disorder and schizophrenia patients: A systematic review. <i>European Neuropsychopharmacology</i> . 2016//. 26:S434                                                                                                    | Level 1, Form Title/abstract screen |
| 1218 | <b>Macneil C.A.,Hasty M.K.,Evans M.,Redlich C.,Berk M.</b> The therapeutic alliance: is it necessary or sufficient to engender positive outcomes?. <i>Acta Neuropsychiatrica</i> . 2009//. 21:95                                                                                                   | Level 1, Form Title/abstract screen |
| 1219 | <b>Prabhu M.,McQuaid-Hanson E.,Hopp S.,Kaimal A.,Leffert L.,Bateman B.T.</b> Shared decision-making for opioid prescribing after cesarean delivery. <i>American Journal of Obstetrics and Gynecology</i> . 2017//. 216:S469                                                                        | Level 1, Form Title/abstract screen |
| 1220 | <b>Abbasi F.</b> Crisis of faith or mental illness?. <i>Journal of the American Academy of Child and Adolescent Psychiatry</i> . 2016//. 55:S22                                                                                                                                                    | Level 1, Form Title/abstract screen |
| 1221 | <b>Szigethy E.</b> Medical home model in treatment of functional abdominal pain. <i>Journal of the American Academy of Child and Adolescent Psychiatry</i> . 2016//. 55:S35                                                                                                                        | Level 1, Form Title/abstract screen |
| 1222 | <b>Dawson K.L.</b> Overview of pharmacological interventions for adolescent tobacco use disorder. <i>Journal of the American Academy of Child and Adolescent Psychiatry</i> . 2016//. 55:S20                                                                                                       | Level 1, Form Title/abstract screen |
| 1226 | <b>Bluml B.M.,Watson L.L.,Skelton J.B.,Manolakis P.G.,Brock K.A.</b> Improving outcomes for diverse populations disproportionately affected by diabetes: Final results of Project IMPACT: Diabetes. <i>Journal of the American Pharmacists Association</i> . 2014//. 54:477                        | Level 1, Form Title/abstract screen |
| 1227 | <b>Buhrer C.</b> Extremely immature infants at the limits of viability. <i>Monatsschrift fur Kinderheilkunde</i> . 2016//. 164:660                                                                                                                                                                 | Level 1, Form Title/abstract screen |
| 1228 | <b>Levenson J.S.,Grady M.D.</b> The Influence of Childhood Trauma on Sexual Violence and Sexual Deviance in Adulthood. <i>Acta Anaesthesiologica Belgica</i> . 2016//. #volume#:#pages#                                                                                                            | Level 1, Form Title/abstract screen |
| 1236 | <b>Carroll J.F.X.,Hall C.E.,Kearse R.,Mooney M.,Potestivo J.,Forman N.</b> Meeting the treatment needs of veterans with substance use disorders. <i>Alcoholism Treatment Quarterly</i> . 2016//. 34:354                                                                                            | Level 1, Form Title/abstract screen |
| 1238 | <b>Catchpole R.E.H.,Brownlie E.B.</b> Characteristics of youth presenting to a Canadian youth concurrent disorders program: Clinical complexity, trauma, adaptive functioning and treatment priorities. <i>Journal of the Canadian Academy of Child and Adolescent Psychiatry</i> . 2016//. 25:106 | Level 1, Form Title/abstract screen |
| 1241 | <b>Bollard E.R.</b> The Management of Chronic Pain: What Do We Know, What Do We Do, and How Should We Redesign Our Comprehensive Assessment and Treatment in order to Provide for More Patient-Centered Care?. <i>Medical Clinics of North America</i> . 2016//. 100:#pages#                       | Level 1, Form Title/abstract screen |
| 1242 | <b>Van Den Heuvel M.,Barozzino T.,Milligan K.,Ford-Jones E.,Freeman S.</b> We need psychologists!. <i>Paediatrics and Child Health (Canada)</i> . 2016//. 21:e1                                                                                                                                    | Level 1, Form Title/abstract screen |
| 1246 | <b>Jonas D.E.,Garza D.</b> An evidence-based approach to screening and providing appropriate interventions for unhealthy alcohol use in primary care settings. <i>Journal of Comparative Effectiveness Research</i> . 2016//. 5:521                                                                | Level 1, Form Title/abstract screen |
| 1250 | <b>Weinstock T.,Kidambi P.,Channick C.L.,Michaud G.C.,Broaddus C.,Makani S.S.,Soylemez Wiener R.,Wilson K.C.,Thomson C.C.</b> Implementation of lung cancer screening programs with low-dose computed tomography in clinical practice. <i>Annals of the American Thoracic Society</i> .            | Level 1, Form Title/abstract screen |

|      |                                                                                                                                                                                                                                                                                                                                    |                                           |
|------|------------------------------------------------------------------------------------------------------------------------------------------------------------------------------------------------------------------------------------------------------------------------------------------------------------------------------------|-------------------------------------------|
|      | 2016//. 13:425                                                                                                                                                                                                                                                                                                                     |                                           |
| 1257 | <b>Pang R.,Van Leur P.,Sullivan S.,Wotherspoon C.</b> The clinical and psychosocial impacts on management to patients with COPD in harp settings. <i>Respirology</i> . 2016//. 21:54                                                                                                                                               | Level 1, Form<br>Title/abstract<br>screen |
| 1258 | <b>Jewell G.,Gera J.,DeRosa M.</b> Transforming maternity care: Signature's strong start maternity medical home model. <i>Obstetrics and Gynecology</i> . 2016//. 127:106S                                                                                                                                                         | Level 1, Form<br>Title/abstract<br>screen |
| 1259 | <b>Anonymous.</b> 8th AACR Conference on the Science of Health Disparities in Racial/Ethnic Minorities and the Medically Underserved. <i>Cancer Epidemiology Biomarkers and Prevention</i> . 2016//. 25:#pages#                                                                                                                    | Level 1, Form<br>Title/abstract<br>screen |
| 1260 | <b>Coyne I.,Gibson F.,Shields L.,Sheaf G.,Leclercq E.,O'Mathuna D.</b> Interventions for promoting participation in shared decision-making for children with cancer: Update of a cochrane review. <i>Pediatric Blood and Cancer</i> . 2016//. 63:S224                                                                              | Level 1, Form<br>Title/abstract<br>screen |
| 1261 | <b>Rutka M.,Ferenci T.,Nagy F.,Szepes Z.,Farkas K.,Balint A.,Bor R.,Milassin A.,Lenart Z.,Molnar T.</b> Do you think that complementary and alternative medicine use is frequent amongst inflammatory bowel disease patients: Forget it!-results from a comparative study. <i>Journal of Crohn's and Colitis</i> . 2016//. 10:S276 | Level 1, Form<br>Title/abstract<br>screen |
| 1262 | <b>Moadel A.,Kolidas E.,Ghavamian R.</b> Psychosocial needs assessment of underserved prostate cancer patients: Survivorship program planning. <i>Journal of Clinical Oncology</i> . 2016//. 34:#pages#                                                                                                                            | Level 1, Form<br>Title/abstract<br>screen |
| 1263 | <b>Chen A.,Kiersma M.,Hutchison R.,Wright K.</b> Psychometric testing of the kiersma-chen empathy scale-patient version. <i>Journal of the American Pharmacists Association</i> . 2016//. 56:e107                                                                                                                                  | Level 1, Form<br>Title/abstract<br>screen |
| 1264 | <b>Andress M.,Lanius P.,Ricchetti C.,Haight R.,Willis R.</b> Assessing 30-day readmissions and interventions provided by community and hospital pharmacy residents collaborating with a provider in a transitions of care clinic. <i>Journal of the American Pharmacists Association</i> . 2016//. 56:e64                          | Level 1, Form<br>Title/abstract<br>screen |
| 1265 | <b>Zatzick D.</b> The design and implementation of a pragmatic trial targeting the full spectrum of alcohol, drug and ptsd comorbidity after injury. <i>Alcoholism: Clinical and Experimental Research</i> . 2016//. 40:307A                                                                                                       | Level 1, Form<br>Title/abstract<br>screen |
| 1266 | <b>Palmer R.H.C.,Brick L.A.,Agrawal A.,Keller M.C.,Heath A.C.,McGeary J.E.,Bierut L.J.,Knopik V.S.</b> Multivariate genetic architecture of DSM-5 alcohol use disorder. <i>Alcoholism: Clinical and Experimental Research</i> . 2016//. 40:306A                                                                                    | Level 1, Form<br>Title/abstract<br>screen |
| 1267 | <b>Clark B.J.,Jones J.,Reed K.D.,Burnham E.L.,Douglas I.S.,Van Pelt D.,Moss M.</b> Barriers to alcohol treatment in medical intensive care unit survivors with alcohol misuse: A qualitative study. <i>Alcoholism: Clinical and Experimental Research</i> . 2016//. 40:243A                                                        | Level 1, Form<br>Title/abstract<br>screen |
| 1268 | <b>Kuerbis A.,Houser J.,Amrhein P.,Morgenstern J.</b> In-session commitment language predicting weekly average of daily commitment among problem drinkers. <i>Alcoholism: Clinical and Experimental Research</i> . 2016//. 40:188A                                                                                                 | Level 1, Form<br>Title/abstract<br>screen |
| 1269 | <b>Parrish D.E.,Benjamins L.,Von Sternberg K.,Duron J.,Velasquez M.M.</b> Choices-teen: Phase I trial to pilot a gender-specific intervention to reduce bundled health risks among females in the juvenile justice system. <i>Alcoholism: Clinical and Experimental Research</i> . 2016//. 40:64A                                  | Level 1, Form<br>Title/abstract<br>screen |
| 1270 | <b>Dash G.,Garcia T.,Anderson K.G.</b> Therapeutic alliance and participant satisfaction in a high school-based group alcohol intervention program.                                                                                                                                                                                | Level 1, Form<br>Title/abstract           |

|      |                                                                                                                                                                                                                                                                                                           |                                           |
|------|-----------------------------------------------------------------------------------------------------------------------------------------------------------------------------------------------------------------------------------------------------------------------------------------------------------|-------------------------------------------|
|      | <i>Alcoholism: Clinical and Experimental Research</i> . 2016//. 40:64A                                                                                                                                                                                                                                    | screen                                    |
| 1271 | <b>Nelson K.M., Sylling P.W., Taylor L., Curtis I., Rose D., Schectman G., Stark R., Fihn S.D.</b> . Elements of the patient centered medical home associated with clinical quality: Evidence for access, continuity and care coordination. <i>Journal of General Internal Medicine</i> . 2016//. 31:S209 | Level 1, Form<br>Title/abstract<br>screen |
| 1272 | <b>Corveleyn A., Irwin K.</b> . Cancer care equity for patients with severe mental illness: A case study of a woman with lung cancer and schizophrenia on clozapine. <i>Psycho-Oncology</i> . 2016//. 25:140                                                                                              | Level 1, Form<br>Title/abstract<br>screen |
| 1273 | <b>Gulati R., Nawaz M., Eltoukhy H., Pysopoulos N.</b> . A comparative readability analysis of online patient education materials for cirrhosis and liver transplant. <i>Gastroenterology</i> . 2016//. 150:S246                                                                                          | Level 1, Form<br>Title/abstract<br>screen |
| 1274 | <b>Papademetriou M., Perreault G., Gillespie C., Zabar S., Weinshel E., Williams R.</b> . Reducing medical errors: Using osces to assess fellows' performance in system based practice milestones. <i>Gastroenterology</i> . 2016//. 150:S146                                                             | Level 1, Form<br>Title/abstract<br>screen |
| 1275 | <b>Chin C., Santos N.</b> . Managing the complexities of patients with substance use disorders through stem cell transplant: Psychoeducation and social work interventions. <i>Biology of Blood and Marrow Transplantation</i> . 2016//. 22:S184                                                          | Level 1, Form<br>Title/abstract<br>screen |
| 1276 | <b>Slatore C.G., Au D.H., Press N., Wiener R.S., Golden S.E., Ganzini L.</b> . Decision making among Veterans with incidental pulmonary nodules: A qualitative analysis. <i>Respiratory Medicine</i> . 2015//. 109:532                                                                                    | Level 1, Form<br>Title/abstract<br>screen |
| 1277 | <b>Ash D., Suetani S., Nair J., Halpin M.</b> . Recovery-based services in a psychiatric intensive care unit - The consumer perspective. <i>Australasian Psychiatry</i> . 2015//. 23:524                                                                                                                  | Level 1, Form<br>Title/abstract<br>screen |
| 1280 | <b>Levine Baruch R., Vishnevsky B., Kalman T.</b> . Split-care patients and their caregivers: How collaborative is collaborative care?. <i>Journal of Nervous and Mental Disease</i> . 2015//. 203:412                                                                                                    | Level 1, Form<br>Title/abstract<br>screen |
| 1281 | <b>Rickerby M.L., Roesler T.A.</b> . Training Child Psychiatrists in Family-Based Integrated Care. <i>Child and Adolescent Psychiatric Clinics of North America</i> . 2015//. 24:501                                                                                                                      | Level 1, Form<br>Title/abstract<br>screen |
| 1288 | <b>Deck S.M., Platt P.A.</b> . Homelessness Is Traumatic: Abuse, Victimization, and Trauma Histories of Homeless Men. <i>Journal of Aggression, Maltreatment and Trauma</i> . 2015//. 24:1022                                                                                                             | Level 1, Form<br>Title/abstract<br>screen |
| 1290 | <b>Ellsberg M., Arango D.J., Morton M., Gennari F., Kiplesund S., Contreras M., Watts C.</b> . Prevention of violence against women and girls: What does the evidence say?. <i>The Lancet</i> . 2015//. 385:1555                                                                                          | Level 1, Form<br>Title/abstract<br>screen |
| 1292 | <b>Raistrick D.S., Tober G.W., Unsworth S.L.</b> . Attitudes of healthcare professionals in a general hospital to patients with substance misuse disorders. <i>Journal of Substance Use</i> . 2015//. 20:56                                                                                               | Level 1, Form<br>Title/abstract<br>screen |
| 1294 | <b>Tsuyuki R.T.</b> . Supporting patient-centred care / A l'appui des soins centres sur le patient. <i>Canadian Pharmacists Journal</i> . 2015//. 148:57                                                                                                                                                  | Level 1, Form<br>Title/abstract<br>screen |
| 1295 | <b>Anonymous.</b> A patient being treated in a primary care clinic receives collaborative care treatment for hypertension and depression. <i>American Journal of Psychiatry</i> . 2015//. 172:722                                                                                                         | Level 1, Form<br>Title/abstract<br>screen |
| 1297 | <b>Loza B., Murawiec S.</b> Long-acting injectable (LAI) antipsychotics for schizophrenia treatment: The new treatment standards. <i>Psychiatry</i> . 2015//. 12:119                                                                                                                                      | Level 1, Form<br>Title/abstract<br>screen |
| 1304 | <b>Teoh Y.P.</b> . Advances in the diagnosis and management of dyslipidaemia.                                                                                                                                                                                                                             | Level 1, Form                             |

|      |                                                                                                                                                                                                                                                                                                                              |                                     |
|------|------------------------------------------------------------------------------------------------------------------------------------------------------------------------------------------------------------------------------------------------------------------------------------------------------------------------------|-------------------------------------|
|      | <i>Prescriber</i> . 2015//. 26:21                                                                                                                                                                                                                                                                                            | Title/abstract screen               |
| 1306 | <b>Aboujaoude E.,Salame W.,Naim L.</b> Telemental health: A status update. <i>World Psychiatry</i> . 2015//. 14:223                                                                                                                                                                                                          | Level 1, Form Title/abstract screen |
| 1307 | <b>Sicot R.,Yguel J.,Mazeas C.,Kalamarides S.,Questel F.,Azuar J.,Braganca A.,Curac S.,Desaive P.,Harbonnier J.,Trabut J.B.,Hispard E.</b> Alcoholic patient's orientation from an emergency department: Situation and perspectives. <i>Journal Europeen des Urgences et de Reanimation</i> . 2015//. 27:77                  | Level 1, Form Title/abstract screen |
| 1308 | <b>McLachlan A.,Sutton T.,Ding P.,Kerr A.</b> A Nurse Practitioner Clinic: A Novel Approach to Supporting Patients Following Heart Valve Surgery. <i>Heart Lung and Circulation</i> . 2015//. 24:1126                                                                                                                        | Level 1, Form Title/abstract screen |
| 1309 | <b>Kajeepeta S.,Gelaye B.,Jackson C.L.,Williams M.A.</b> Adverse childhood experiences are associated with adult sleep disorders: A systematic review. <i>Sleep Medicine</i> . 2015//. 16:320                                                                                                                                | Level 1, Form Title/abstract screen |
| 1314 | <b>Park M.,Reynolds C.F.</b> Depression among older adults with diabetes mellitus. <i>Clinics in Geriatric Medicine</i> . 2015//. 31:117                                                                                                                                                                                     | Level 1, Form Title/abstract screen |
| 1322 | <b>Lefebvre K.</b> Usability of a mobile application to educate military personnel about prescription drug abuse. <i>Journal of the American Pharmacists Association</i> . 2015//. 55:e421                                                                                                                                   | Level 1, Form Title/abstract screen |
| 1323 | <b>Zeev Y.B.,Bovill M.,Bonevski B.,Gould G.</b> Indigenous Counselling And Nicotine (ICAN) quit in pregnancy-developing an evidence-based intervention for smoking cessation for indigenous pregnant women. <i>Asia-Pacific Journal of Clinical Oncology</i> . 2015//. 11:8                                                  | Level 2, Form Full Text Screening   |
| 1324 | <b>David P.</b> Multidisciplinary approach to a comprehensive CT screening. <i>Journal of Thoracic Oncology</i> . 2015//. 10:S156                                                                                                                                                                                            | Level 1, Form Title/abstract screen |
| 1325 | <b>Sawa T.,Eguchi K.,Nakanishi Y.,Nakagawa K.,Mitsudomi T.</b> Advocates making a responsible case for high-risk screening. <i>Journal of Thoracic Oncology</i> . 2015//. 10:S120                                                                                                                                            | Level 1, Form Title/abstract screen |
| 1326 | <b>Bogojevic G.,Zigmund D.,Ziravac L.</b> The problem of non-compliance during treatment of schizophrenia. <i>European Archives of Psychiatry and Clinical Neuroscience</i> . 2015//. 265:S66                                                                                                                                | Level 1, Form Title/abstract screen |
| 1327 | <b>Catino A.,Aloe F.,Piccininno M.E.,Daniele A.,Misino A.,Ricci D.,Damiani B.,Cormio C.,Logroscino A.,Galetta D.</b> An interdisciplinary early simultaneous palliative approach in advanced lung cancer (a-LC): Preliminary data in outpatient setting experience. <i>Journal of Clinical Oncology</i> . 2015//. 33:#pages# | Level 1, Form Title/abstract screen |
| 1329 | <b>Mitchell S.G.,Monico L.,Lertch E.,Gryczynski J.,Kelly S.M.,O'Grady K.E.,Jaffe J.H.,Schwartz R.P.</b> Counselors' views of providing patient-centered methadone treatment in a clinical trial. <i>Drug and Alcohol Dependence</i> . 2015//. 156:e154                                                                       | Level 2, Form Full Text Screening   |
| 1330 | <b>Plaisanu C.,Iorgoveanu V.,Neagu A.,Ionescu R.</b> Evaluation of patients' awareness regarding glucocorticoids side effects and prevention strategies. <i>Annals of the Rheumatic Diseases</i> . 2015//. 74:413                                                                                                            | Level 1, Form Title/abstract screen |
| 1331 | <b>Weinshel E.,Balzora S.,Dikman A.,Malter L.,Gillespie C.,Zabar S.</b> Experiential faculty development program: Using objective structured clinical examinations (OSCEs) to assess and reinforce practicing physicians' patient-                                                                                           | Level 1, Form Title/abstract screen |

|      |                                                                                                                                                                                                                                                                                           |                                     |
|------|-------------------------------------------------------------------------------------------------------------------------------------------------------------------------------------------------------------------------------------------------------------------------------------------|-------------------------------------|
|      | centered care skills. <i>American Journal of Gastroenterology</i> . 2015//. 110:S927                                                                                                                                                                                                      |                                     |
| 1332 | <b>Belle-Isle L.,Pauly B.,Benoit C.</b> . At the table with people who use drugs: How is power in decision-making being shared?. <i>Canadian Journal of Infectious Diseases and Medical Microbiology</i> . 2015//. 26:119B                                                                | Level 1, Form Title/abstract screen |
| 1333 | <b>Farinha T.,Lanius P.,Shea L.,Vatanka P.,Willis R.,Ricchetti C.</b> . Does a community pharmacist's intervention post hospital discharge have an impact on 30-day or 90-day smoking cessation rates?. <i>Journal of the American Pharmacists Association</i> . 2015//. 55:e203          | Level 1, Form Title/abstract screen |
| 1334 | <b>Geng S.,Roberts P.,Maris L.,Nichol A.,Bloch D.</b> . Effects of a non-narcotic pain management program through collaborative practice with pharmacists and physicians. <i>Journal of the American Pharmacists Association</i> . 2015//. 55:e188                                        | Level 1, Form Title/abstract screen |
| 1335 | <b>Simmons V.,Diaz D.,Meltzer L.,Hoehn A.,Sutton S.,Meade C.,Jacobsen P.,McCaffrey J.,Haura E.,Brandon T.</b> . Smoking relapse prevention intervention for cancer patients. <i>Psycho-Oncology</i> . 2015//. 24:33                                                                       | Level 1, Form Title/abstract screen |
| 1337 | <b>Vasilian C.,Tamasan S.</b> . Changing mentalities in general hospital mental health care-arguments from reality based liaison psychiatry data Romanian experience. <i>European Psychiatry</i> . 2015//. 30:611                                                                         | Level 1, Form Title/abstract screen |
| 1338 | <b>Bradley K.,Lee A.,Richards J.,Ludman E.,Lozano P.,Caldeiro R.</b> . Improving care for alcohol misuse in medical settings: Patient and family needs. <i>Alcoholism: Clinical and Experimental Research</i> . 2015//. 39:205A                                                           | Level 2, Form Full Text Screening   |
| 1339 | <b>Schlauch R.C.,Connors G.J.,Maisto S.A.,Dearing R.,Prince M.,Duerr M.</b> . Therapeutic alliance and drinking behavior over the course of treatment for alcohol dependence. <i>Alcoholism: Clinical and Experimental Research</i> . 2015//. 39:140A                                     | Level 2, Form Full Text Screening   |
| 1340 | <b>Prince M.A.,Connors G.J.,Maisto S.A.,Dearing R.L.</b> . Within treatment therapeutic alliance rating profiles predict post treatment frequency of alcohol use. <i>Alcoholism: Clinical and Experimental Research</i> . 2015//. 39:140A                                                 | Level 2, Form Full Text Screening   |
| 1341 | <b>Aharonovich E.,Hasin D.,Delker E.,Cannizzaro D.</b> . Prevalence and clinical correlates of binge drinking among HIV drug abusers in brief interventions. <i>Alcoholism: Clinical and Experimental Research</i> . 2015//. 39:20A                                                       | Level 1, Form Title/abstract screen |
| 1342 | <b>Lapham G.T.,Lee A.,Williams E.C.,Richards J.,Ludman E.,Bradley K.A.</b> . The relationship between social network support and readiness to change drinking among primary care patients with unhealthy drinking. <i>Alcoholism: Clinical and Experimental Research</i> . 2015//. 39:18A | Level 1, Form Title/abstract screen |
| 1343 | <b>Quinn A.E.,Horgan C.M.,Hodgkin D.,Stewart M.,Brolin M.,Lane N.</b> . Bundled payment for alcohol use disorder treatment. <i>Alcoholism: Clinical and Experimental Research</i> . 2015//. 39:12A                                                                                        | Level 1, Form Title/abstract screen |
| 1344 | <b>Epstein A.J.,Barry C.L.,Fiellin D.A.,Busch S.H.</b> . Patient valuation of different approaches to mental health and substance use disorder treatment. <i>Value in Health</i> . 2015//. 18:A277                                                                                        | Level 1, Form Title/abstract screen |
| 1346 | <b>Jackson S.L.,Chwastiak L.,Chew L.,Kiefer M.M.,Mertens K.,De keyser P.,Lin E.</b> . Implementation of team-based care for diabetes for safety net population with complex medical and psychosocial comorbidities. <i>Journal of General Internal Medicine</i> . 2015//. 30:S536         | Level 1, Form Title/abstract screen |
| 1347 | <b>Roth S.L.,Ricketts S.,Shaparin N.,Jacobs C.,Desantis D.,Khalid L.,Houghton L.,Starrels J.L.</b> . Copilots: A collaborative pain intervention for long-term opioid treatment safety. <i>Journal of General Internal Medicine</i> . 2015//. 30:S529                                     | Level 1, Form Title/abstract screen |

|      |                                                                                                                                                                                                                                                                                                                                                                                 |                                           |
|------|---------------------------------------------------------------------------------------------------------------------------------------------------------------------------------------------------------------------------------------------------------------------------------------------------------------------------------------------------------------------------------|-------------------------------------------|
| 1348 | <b>Sedhom R.,Sharma R.</b> The importance of patient education and communication at hospital discharge: A case of rapid recognition and readmission for guillain-barre syndrome as a result of the teach-back method. <i>Journal of General Internal Medicine</i> . 2015//. 30:S463                                                                                             | Level 1, Form<br>Title/abstract<br>screen |
| 1349 | <b>Nelson K.M.,Sylling P.W.,Wong E.,Taylor L.,Helfrich C.D.,Curtis I.,Schectman G.,Stark R.,Fihn S.D.</b> Implementation of the patient centered medical home (PCMH) in the veterans health administration (VHA): Associations with clinical outcomes, patient satisfaction, provider burnoutand health care use. <i>Journal of General Internal Medicine</i> . 2015//. 30:S185 | Level 1, Form<br>Title/abstract<br>screen |
| 1350 | <b>Block L.,LaVine N.A.,Verbsky J.,Conigliaro J.,Chaudhry S.</b> Do internal medicine residents perform patient centered medical home EPAs? A mixed-methods study. <i>Journal of General Internal Medicine</i> . 2015//. 30:S141                                                                                                                                                | Level 1, Form<br>Title/abstract<br>screen |
| 1351 | <b>Barry C.,Busch S.,Epstein A.,Fiellin D.</b> Willingness to enter drug treatment: The role of treatment models, copays and financial incentives. <i>Drug and Alcohol Dependence</i> . 2015//. 146:e218                                                                                                                                                                        | Level 1, Form<br>Title/abstract<br>screen |
| 1352 | <b>Rivera-Suazo S.,Albizu C.E.,Santiago S.,Perez C.</b> Stigmatizing experiences while in drug abuse treatment: A qualitative exploration of client's perceptions. <i>Drug and Alcohol Dependence</i> . 2015//. 146:e81                                                                                                                                                         | Level 1, Form<br>Title/abstract<br>screen |
| 1353 | <b>Morse D.,Cerulli C.,Bandyopadhyay S.,Guido J.J.,Yang H.,Wilson J.L.,Taxman F.</b> Support, traumatization, and employment differences in drug court outcomes. <i>Drug and Alcohol Dependence</i> . 2015//. 146:e47                                                                                                                                                           | Level 1, Form<br>Title/abstract<br>screen |
| 1354 | <b>Tofighi B.,Grossman E.,Buirkle E.,Lee J.D.</b> Mobile phone and text messaging in a public sector, office-based buprenorphine program. <i>Drug and Alcohol Dependence</i> . 2015//. 146:e4                                                                                                                                                                                   | Level 1, Form<br>Title/abstract<br>screen |
| 1355 | <b>Mullin M.,Kovalenko E.,Ousley P.,Hurd C.,Harris H.,Kinderman A.</b> Bringing it to the streets: A novel approach to improve palliative care for homeless adults. <i>Journal of Pain and Symptom Management</i> . 2015//. 49:383                                                                                                                                              | Level 1, Form<br>Title/abstract<br>screen |
| 1356 | <b>Tierce-Hazard S.,Sadarangani T.</b> Optimizing the primary care management of chronic pain through telecare. <i>Journal of Clinical Outcomes Management</i> . 2014//. 21:493                                                                                                                                                                                                 | Level 1, Form<br>Title/abstract<br>screen |
| 1357 | <b>Garimella P.S.,Hirsch A.T.</b> Peripheral artery disease and chronic kidney disease: Clinical synergy to improve outcomes. <i>Advances in Chronic Kidney Disease</i> . 2014//. 21:460                                                                                                                                                                                        | Level 1, Form<br>Title/abstract<br>screen |
| 1358 | <b>Powell A.A.,White K.M.,Partin M.R.,Halek K.,Hysong S.J.,Zarling E.,Kirsh S.R.,Bloomfield H.E.</b> More than a score: A qualitative study of ancillary benefits of performance measurement. <i>BMJ Quality and Safety</i> . 2014//. 23:651                                                                                                                                    | Level 1, Form<br>Title/abstract<br>screen |
| 1360 | <b>Siantz E.,Aranda M.P.</b> Chronic disease self-management interventions for adults with serious mental illness: A systematic review of the literature. <i>General Hospital Psychiatry</i> . 2014//. 36:233                                                                                                                                                                   | Level 1, Form<br>Title/abstract<br>screen |
| 1361 | <b>Brenner C.J.,Shyn S.I.</b> Diagnosis and Management of Bipolar Disorder in Primary Care. A DSM-5 Update. <i>Medical Clinics of North America</i> . 2014//. 98:1025                                                                                                                                                                                                           | Level 1, Form<br>Title/abstract<br>screen |
| 1362 | <b>Ardino V.</b> Trauma-informed care: Is cultural competence a viable solution for efficient policy strategies?. <i>Clinical Neuropsychiatry</i> . 2014//. 11:45                                                                                                                                                                                                               | Level 1, Form<br>Title/abstract<br>screen |
| 1363 | <b>Hollon S.D.,Arean P.A.,Craske M.G.,Crawford K.A.,Kivlahan D.R.,Magnavita J.J.,Ollendick T.H.,Sexton T.L.,Spring B.,Bufka L.F.,Galper D.I.,Kurtzman H.</b> Development of clinical practice guidelines.                                                                                                                                                                       | Level 1, Form<br>Title/abstract<br>screen |

|      |                                                                                                                                                                                                                                                                                                                            |                                           |
|------|----------------------------------------------------------------------------------------------------------------------------------------------------------------------------------------------------------------------------------------------------------------------------------------------------------------------------|-------------------------------------------|
|      | <i>Annual Review of Clinical Psychology</i> . 2014//. 10:213                                                                                                                                                                                                                                                               |                                           |
| 1365 | <b>Esquibel A.Y.,Borkan J.</b> Doctors and patients in pain: Conflict and collaboration in opioid prescription in primary care. <i>Pain</i> . 2014//. 155:2575                                                                                                                                                             | Level 1, Form<br>Title/abstract<br>screen |
| 1366 | <b>Chao D.V.K.</b> Collaborative care. <i>Hong Kong Practitioner</i> . 2014//. 36:1                                                                                                                                                                                                                                        | Level 1, Form<br>Title/abstract<br>screen |
| 1367 | <b>Helling D.K.,Johnson S.G.</b> Defining and advancing ambulatory care pharmacy practice: It is time to lengthen our stride. <i>American Journal of Health-System Pharmacy</i> . 2014//. 71:1348                                                                                                                          | Level 1, Form<br>Title/abstract<br>screen |
| 1368 | <b>Tumber P.S.</b> Optimizing perioperative analgesia for the complex pain patient: Medical and interventional strategies. <i>Canadian Journal of Anesthesia</i> . 2014//. 61:131                                                                                                                                          | Level 1, Form<br>Title/abstract<br>screen |
| 1372 | <b>Rice K.,Bourbeau J.,MacDonald R.,Wilt T.J.</b> Collaborative self-management and behavioral change. <i>Clinics in Chest Medicine</i> . 2014//. 35:337                                                                                                                                                                   | Level 1, Form<br>Title/abstract<br>screen |
| 1373 | <b>Bender B.G.</b> Nonadherence in chronic obstructive pulmonary disease patients: What do we know and what should we do next?. <i>Current Opinion in Pulmonary Medicine</i> . 2014//. 20:132                                                                                                                              | Level 1, Form<br>Title/abstract<br>screen |
| 1374 | <b>Wiarda N.R.,McMinn M.R.,Peterson M.A.,Gregor J.A.</b> Use of technology for note taking and therapeutic alliance. <i>Psychotherapy</i> . 2014//. 51:443                                                                                                                                                                 | Level 1, Form<br>Title/abstract<br>screen |
| 1377 | <b>Glowacz F.,Buzitu R.</b> Girls victims of sexual abuse and delinquent trajectory: What factors of resiliency?. <i>Neuropsychiatrie de l'Enfance et de l'Adolescence</i> . 2014//. 62:349                                                                                                                                | Level 1, Form<br>Title/abstract<br>screen |
| 1379 | <b>Chung B.,Ong M.,Ettner S.L.,Jones F.,Gilmore J.,McCreary M.,Sherbourne C.,Ngo V.,Koegel P.,Tang L.,Dixon E.,Miranda J.,Belin T.R.,Wells K.B.</b> 12-month outcomes of community engagement versus technical assistance to implement depression collaborative care. <i>Annals of Internal Medicine</i> . 2014//. 161:S23 | Level 1, Form<br>Title/abstract<br>screen |
| 1380 | <b>Planner C.,Gask L.,Reilly S.</b> Serious mental illness and the role of primary care. <i>Current Psychiatry Reports</i> . 2014//. 16:458                                                                                                                                                                                | Level 1, Form<br>Title/abstract<br>screen |
| 1382 | <b>Arnow B.A.,Steidtmann D.</b> Harnessing the potential of the therapeutic alliance. <i>World Psychiatry</i> . 2014//. 13:238                                                                                                                                                                                             | Level 1, Form<br>Title/abstract<br>screen |
| 1384 | <b>Kramer U.,Berthoud L.,Keller S.,Caspar F.</b> Motive-oriented psychotherapeutic relationship facing a patient presenting with narcissistic personality disorder: A case study. <i>Journal of Contemporary Psychotherapy</i> . 2014//. 44:71                                                                             | Level 1, Form<br>Title/abstract<br>screen |
| 1385 | <b>Johnson A.M.,Goldstein L.B.,Bennett P.,O'Brien E.C.,Rosamond W.D.</b> Compliance with acute stroke care quality measures in hospitals with and without primary stroke center certification: The North Carolina Stroke Care Collaborative. <i>Journal of the American Heart Association</i> . 2014//. 3:e000423          | Level 1, Form<br>Title/abstract<br>screen |
| 1386 | <b>Du Plessis J.,Brar S.,Kalluri M.</b> A review of fibrotic lung diseases in older age. <i>CME Journal Geriatric Medicine</i> . 2014//. 15:58                                                                                                                                                                             | Level 1, Form<br>Title/abstract<br>screen |
| 1391 | <b>Williams I.L.</b> Considering discontinuation of drug use as a potentially traumatizing event. <i>Mental Health and Substance Use: Dual Diagnosis</i> . 2014//.                                                                                                                                                         | Level 1, Form<br>Title/abstract           |

|      |                                                                                                                                                                                                                                                                                                                                                                                                                                                                                                                  |                                           |
|------|------------------------------------------------------------------------------------------------------------------------------------------------------------------------------------------------------------------------------------------------------------------------------------------------------------------------------------------------------------------------------------------------------------------------------------------------------------------------------------------------------------------|-------------------------------------------|
|      | 7:1                                                                                                                                                                                                                                                                                                                                                                                                                                                                                                              | screen                                    |
| 1392 | <b>Baharudin D.F.,Mohd Hussin A.H.,Sumari M.,Mohamed S.,Zakaria M.Z.,Sawai R.P.</b> . Family intervention for the treatment and rehabilitation of drug addiction: An exploratory study. <i>Journal of Substance Use</i> . 2014//. 19:301                                                                                                                                                                                                                                                                         | Level 1, Form<br>Title/abstract<br>screen |
| 1394 | <b>Berardi D.,Ferrannini L.,Menchetti M.,Vaggi M.</b> . Primary care psychiatry in Italy. <i>Journal of Nervous and Mental Disease</i> . 2014//. 202:460                                                                                                                                                                                                                                                                                                                                                         | Level 1, Form<br>Title/abstract<br>screen |
| 1396 | <b>Yohannes A.M.,Alexopoulos G.S.</b> . Depression and anxiety in patients with COPD. <i>European Respiratory Review</i> . 2014//. 23:345                                                                                                                                                                                                                                                                                                                                                                        | Level 1, Form<br>Title/abstract<br>screen |
| 1400 | <b>Inzerillo F.,Barrale C.,Catanese G.,Calandra F.</b> . That obscure object of desire: Psychological and psychodynamic aspects of the relationship between elderly and drug. <i>Giornale di Gerontologia</i> . 2014//. 62:506                                                                                                                                                                                                                                                                                   | Level 1, Form<br>Title/abstract<br>screen |
| 1402 | <b>Ruescas-Escolano E.,Orozco-Beltran D.,Gaubert-Tortosa M.,Navarro-Palazon A.,Cordero-Fort A.,Navarro-Perez J.,Carratala-Munuera C.,Pertusa-Martinez S.,Soler-Bahilo E.,Brotons-Munto F.,Bort-Cubero J.,Nunez-Martinez M.A.,Bertomeu-Martinez V.,Lopez-Pineda A.,Gil-Guillen V.F.</b> . The PROPRESE trial: Results of a new health care organizational model in primary care for patients with chronic coronary heart disease based on a multifactorial intervention. <i>Atencion Primaria</i> . 2014//. 46:10 | Level 1, Form<br>Title/abstract<br>screen |
| 1413 | <b>Erickson A.,Becker M.,Shaw S.,Kasper K.,Keynan Y.</b> . Substance use and its impact on care outcomes among HIV-infected individuals in Manitoba. <i>Canadian Journal of Infectious Diseases and Medical Microbiology</i> . 2014//. 25:91A                                                                                                                                                                                                                                                                    | Level 1, Form<br>Title/abstract<br>screen |
| 1414 | <b>Stridsman C.,Zingmark K.,Lindberg A.,Skar L.</b> . Experiences of well-being when living with chronic obstructive pulmonary disease (COPD). <i>European Respiratory Journal</i> . 2014//. 44:#pages#                                                                                                                                                                                                                                                                                                          | Level 1, Form<br>Title/abstract<br>screen |
| 1415 | <b>Smith A.L.,MacDonald N.,Thavarajah K.,DiGiovine B.,Kalus J.S.</b> . Development and implementation of clinical pharmacy services within an outpatient pulmonary clinic. <i>Pharmacotherapy</i> . 2014//. 34:e232                                                                                                                                                                                                                                                                                              | Level 1, Form<br>Title/abstract<br>screen |
| 1416 | <b>Johnson S.C.</b> . Building bridges: Networking to establish the exchange of culturally sensitive addiction treatment modalities and research. <i>Alcohol and Alcoholism</i> . 2014//. 49:#pages#                                                                                                                                                                                                                                                                                                             | Level 1, Form<br>Title/abstract<br>screen |
| 1417 | <b>Mizusawa T.</b> . Building bridges: Networking to establish the exchange of culturally sensitive addiction treatment modalities and research. <i>Alcohol and Alcoholism</i> . 2014//. 49:#pages#                                                                                                                                                                                                                                                                                                              | Level 1, Form<br>Title/abstract<br>screen |
| 1418 | <b>Matsumoto T.</b> . Building bridges: Networking to establish the exchange of culturally sensitive addiction treatment modalities and research. <i>Alcohol and Alcoholism</i> . 2014//. 49:#pages#                                                                                                                                                                                                                                                                                                             | Level 1, Form<br>Title/abstract<br>screen |
| 1419 | <b>Saito T.</b> . The history of alcoholism treatment in Japan. <i>Alcohol and Alcoholism</i> . 2014//. 49:#pages#                                                                                                                                                                                                                                                                                                                                                                                               | Level 1, Form<br>Title/abstract<br>screen |
| 1420 | <b>O'Mara B.</b> . Lessons learned: A partnership approach for 'smoking care' in a housing crisis and homelessness services organisation. <i>Asia-Pacific Journal of Clinical Oncology</i> . 2014//. 10:201                                                                                                                                                                                                                                                                                                      | Level 1, Form<br>Title/abstract<br>screen |
| 1421 | <b>McNair C.,Alker-Jones H.</b> . Youth Mental Health Nurse Practitioners: An Australian regional and rural approach. <i>Early Intervention in Psychiatry</i> . 2014//. 8:161                                                                                                                                                                                                                                                                                                                                    | Level 1, Form<br>Title/abstract<br>screen |



|      |                                                                                                                                                                                                                                                                                                                                                                                                                                                       |                                           |
|------|-------------------------------------------------------------------------------------------------------------------------------------------------------------------------------------------------------------------------------------------------------------------------------------------------------------------------------------------------------------------------------------------------------------------------------------------------------|-------------------------------------------|
| 1422 | <b>Addington J.</b> Psychosocial treatment in the RAISE-ETP study. <i>Early Intervention in Psychiatry</i> . 2014//. 8:1                                                                                                                                                                                                                                                                                                                              | Level 1, Form<br>Title/abstract<br>screen |
| 1423 | <b>Graffi J.,Quoix E.,Molard A.,Kopferschmitt-Kubler M.-C.,Bacque M.-F.</b> Conflict and therapeutic alliance: The refusal of smoking cessation despite medical guidelines. <i>Psycho-Oncology</i> . 2014//. 23:230                                                                                                                                                                                                                                   | Level 1, Form<br>Title/abstract<br>screen |
| 1424 | <b>Harley B.</b> Should HIV and tuberculosis services be integrated in settings with high TB/HIV co-infection?. <i>International Journal of Infectious Diseases</i> . 2014//. 21:44                                                                                                                                                                                                                                                                   | Level 1, Form<br>Title/abstract<br>screen |
| 1425 | <b>Di Prospero L.S.,Robson S.,Gupta T.D.,Bristow B.,Peacock M.,O'Leary B.</b> Leading practice: Integrating best practice initiatives as part of the radiation therapist role. <i>Journal of Medical Imaging and Radiation Sciences</i> . 2014//. 45:164                                                                                                                                                                                              | Level 1, Form<br>Title/abstract<br>screen |
| 1426 | <b>Bradley K.A.,Lapham G.T.,Richards J.,Merrill J.O.,Williams E.C.,Lee A.K.,Holden E.,Chavez L.J.,Kivlahan D.R.</b> The prevalence of DSM-IV versus DSM-5 alcohol use disorders (AUD) in primary care patients at high risk for AUD in the choice trial. <i>Alcoholism: Clinical and Experimental Research</i> . 2014//. 38:124A                                                                                                                      | Level 1, Form<br>Title/abstract<br>screen |
| 1427 | <b>Hawkins E.J.,Lapham G.T.,Lee A.K.,Kivlahan D.R.,Berger B.D.,Hebert P.L.,Saxon A.J.,Bradley K.A.</b> Prevalence and comorbidity of PTSD among heavy drinkers enrolled in a collaborative care trial for alcohol use disorders in VA primary care. <i>Alcoholism: Clinical and Experimental Research</i> . 2014//. 38:63A                                                                                                                            | Level 1, Form<br>Title/abstract<br>screen |
| 1428 | <b>Williams E.C.,Lapham G.T.,Lee A.K.,Richards J.E.,Berger D.B.,Ludman E.,Bradley K.A.</b> Readiness to change and severity of unhealthy alcohol use among primary care patients recruited to a trial of collaborative care. <i>Alcoholism: Clinical and Experimental Research</i> . 2014//. 38:57A                                                                                                                                                   | Level 1, Form<br>Title/abstract<br>screen |
| 1429 | <b>Ludman E.J.,Williams E.C.,Lapham G.,Richards J.,Chavez L.,Merrill J.,Holden E.,Greenberg D.,Bradley K.</b> Baseline prevalence and correlates of depression among heavy drinking veterans enrolled in a collaborative care randomized trial. <i>Alcoholism: Clinical and Experimental Research</i> . 2014//. 38:46A                                                                                                                                | Level 1, Form<br>Title/abstract<br>screen |
| 1430 | <b>Seal K.H.,Sachs E.,Lin T.,Tarasovsky G.,Bertenthal D.,Koenig C.J.</b> Implementing change in clinical practice culture: Pain and opioid management bootcamps for VA clinicians. <i>Journal of General Internal Medicine</i> . 2014//. 29:S522                                                                                                                                                                                                      | Level 1, Form<br>Title/abstract<br>screen |
| 1431 | <b>Pace C.A.,Tsui J.J.,Nader C.,Bergeron L.P.,LaBelle C.T.,Samet J.H.</b> Integrating care for hepatitis C virus infection with office-based therapy for opioid dependence. <i>Journal of General Internal Medicine</i> . 2014//. 29:S488                                                                                                                                                                                                             | Level 1, Form<br>Title/abstract<br>screen |
| 1432 | <b>Bradley K.,Lapham G.T.,Richards J.E.,Merrill J.,Williams E.,Lee A.K.,Holden E.,Chavez L.,Kivlahan D.</b> Results of population-based, proactive outreach to nontreatment seeking primary care patients at high risk for aud in the choice trial. <i>Journal of General Internal Medicine</i> . 2014//. 29:S202                                                                                                                                     | Level 1, Form<br>Title/abstract<br>screen |
| 1433 | <b>Nelson K.M.,Helfrich C.,Sun H.,Hebert P.,Liu C.-F.,Dolan E.D.,Taylor L.,Wong E.,Maynard C.,Hernandez S.,Sanders W.J.,Curtis I.,Randall I.A.,Schectman G.,Stark R.,Fihn S.D.</b> Implementation of the patient centered medical home (PCMH) in the veterans health administration (VHA); Associations with clinical outcomes, patient satisfaction, provider burnout and utilization. <i>Journal of General Internal Medicine</i> . 2014//. 29:S123 | Level 1, Form<br>Title/abstract<br>screen |
| 1434 | <b>Rodgers M.A.,Shofer F.S.,Rhodes K.V.</b> Impact of childhood sexual abuse on                                                                                                                                                                                                                                                                                                                                                                       | Level 1, Form                             |

|      |                                                                                                                                                                                                                                                                                                                                                           |                                     |
|------|-----------------------------------------------------------------------------------------------------------------------------------------------------------------------------------------------------------------------------------------------------------------------------------------------------------------------------------------------------------|-------------------------------------|
|      | the severity of psychosocial risks among female ED patients. <i>Academic Emergency Medicine</i> . 2014//. 21:S59                                                                                                                                                                                                                                          | Title/abstract screen               |
| 1435 | <b>Kennedy G.,Ricketts S.,Ceide M.E.,Marcus P.</b> Emerging models of psychiatric services in a pioneer accountable care organization: Personal reflections of psychiatrists on the front line. <i>American Journal of Geriatric Psychiatry</i> . 2014//. 22:S14                                                                                          | Level 1, Form Title/abstract screen |
| 1436 | <b>Ramirez M.D.,Marsh B.</b> Cotton fever: A self-limiting syndrome in IVDA. <i>Journal of Investigative Medicine</i> . 2014//. 62:281                                                                                                                                                                                                                    | Level 1, Form Title/abstract screen |
| 1437 | <b>White J.</b> Understanding the value of the lung cancer nurse specialist. <i>Lung Cancer</i> . 2014//. 83:S40                                                                                                                                                                                                                                          | Level 1, Form Title/abstract screen |
| 1438 | <b>Leclerc E.,Mansur R.B.,Brietzke E.</b> Determinants of adherence to treatment in bipolar disorder: A comprehensive review. <i>Journal of Affective Disorders</i> . 2013//. 149:247                                                                                                                                                                     | Level 1, Form Title/abstract screen |
| 1440 | <b>Pompili M.,Venturini P.,Palermo M.,Stefani H.,Seretti M.E.,Lamis D.A.,Serafini G.,Amore M.,Girardi P.</b> Mood disorders medications: Predictors of nonadherence - Review of the current literature. <i>Expert Review of Neurotherapeutics</i> . 2013//. 13:809                                                                                        | Level 1, Form Title/abstract screen |
| 1442 | <b>Kuehn B.M.</b> Health reform, research pave way for collaborative care for mental illness. <i>JAMA - Journal of the American Medical Association</i> . 2013//. 309:2425                                                                                                                                                                                | Level 1, Form Title/abstract screen |
| 1444 | <b>Elos D.</b> A therapeutic community for female patients with dual diagnosis: Protected residence for treatment of sexually abused women Clinical reflections, difficulties in the treatment and hypotheses for intervention in the therapeutic community. <i>Psychotropes (Belgium)</i> . 2013//. 19:109                                               | Level 1, Form Title/abstract screen |
| 1445 | <b>Crawford G.B.,Burgess T.A.,Young M.,Brooksbank M.A.,Brown M.</b> A patient-centred model of care incorporating a palliative approach: A framework to meet the needs of people with advanced COPD?. <i>Progress in Palliative Care</i> . 2013//. 21:286                                                                                                 | Level 1, Form Title/abstract screen |
| 1446 | <b>Casimir Y.E.,Williams M.M.,Liang M.Y.,Pitakmongkolkul S.,Slyer J.T.</b> Effectiveness of patient-centered self-care education for adults with heart failure on knowledge, self-care behaviors, quality of life, and readmissions: A systematic review protocol. <i>JB I Database of Systematic Reviews and Implementation Reports</i> . 2013//. 11:107 | Level 1, Form Title/abstract screen |
| 1449 | <b>Shirley E.D.,Sanders D.O.</b> The orthopaedic forum :Patient satisfaction: Implications and predictors of success. <i>Journal of Bone and Joint Surgery - Series A</i> . 2013//. 95:e691                                                                                                                                                               | Level 1, Form Title/abstract screen |
| 1451 | <b>Juska M.,Balon R.</b> Chronic non-cancer pain and substance use disorders: Challenges and strategies. <i>Current Psychiatry</i> . 2013//. 12:35                                                                                                                                                                                                        | Level 2, Form Full Text Screening   |
| 1453 | <b>Pavao J.,Turchik J.A.,Hyun J.K.,Karpenko J.,Saweikis M.,McCutcheon S.,Kane V.,Kimerling R.</b> Military sexual trauma among homeless veterans. <i>Journal of General Internal Medicine</i> . 2013//. 28:S536                                                                                                                                           | Level 1, Form Title/abstract screen |
| 1455 | <b>Matthias M.S.,Krebs E.E.,Collins L.A.,Bergman A.A.,Coffing J.,Bair M.J.</b> "I'm Not Abusing or Anything": Patient-physician communication about opioid treatment in chronic pain. <i>Patient Education and Counseling</i> . 2013//. 93:197                                                                                                            | Level 1, Form Title/abstract screen |
| 1456 | <b>Boiselle P.M.</b> Computed tomography screening for lung cancer. <i>JAMA - Journal of the American Medical Association</i> . 2013//. 309:1163                                                                                                                                                                                                          | Level 1, Form Title/abstract        |

|      |                                                                                                                                                                                                                                                                                                          |                                           |
|------|----------------------------------------------------------------------------------------------------------------------------------------------------------------------------------------------------------------------------------------------------------------------------------------------------------|-------------------------------------------|
|      |                                                                                                                                                                                                                                                                                                          | screen                                    |
| 1459 | <b>Linden I.A.,Torchalla I.,Krausz M.</b> . Addiction in maternity: Prevalence of mental illness, substance use, and trauma. <i>Journal of Aggression, Maltreatment and Trauma</i> . 2013//. 22:1070                                                                                                     | Level 1, Form<br>Title/abstract<br>screen |
| 1461 | <b>Pallaveshi L.,Zisman-Ilani Y.,Roe D.,Rudnick A.</b> . Psychiatric rehabilitation pertaining to health care environments: Facilitating skills and supports of people with mental illness in relation to their mental and physical health care. <i>Current Psychiatry Reviews</i> . 2013//. 9:214       | Level 1, Form<br>Title/abstract<br>screen |
| 1466 | <b>Cahana A.,Dansie E.J.,Theodore B.R.,Wilson H.D.,Turk D.C.</b> . Redesigning Delivery of Opioids to Optimize Pain Management, Improve Outcomes, and Contain Costs. <i>Pain Medicine (United States)</i> . 2013//. 14:36                                                                                | Level 1, Form<br>Title/abstract<br>screen |
| 1467 | <b>Angstman K.B.,Shippee N.D.,MacLaughlin K.L.,Rasmussen N.H.,Wilkinson J.M.,Williams M.D.,Katzelnick D.J.</b> . Patient self-assessment factors predictive of persistent depressive symptoms 6 months after enrollment in collaborative care management. <i>Depression and Anxiety</i> . 2013//. 30:143 | Level 1, Form<br>Title/abstract<br>screen |
| 1468 | <b>Wortzel H.S.,Matarazzo B.,Homaifar B.</b> . A model for therapeutic risk management of the suicidal patient. <i>Journal of Psychiatric Practice</i> . 2013//. 19:323                                                                                                                                  | Level 1, Form<br>Title/abstract<br>screen |
| 1470 | <b>Politi M.C.,Wolin K.Y.,Legare F.</b> . Implementing clinical practice guidelines about health promotion and disease prevention through shared decision making. <i>Journal of General Internal Medicine</i> . 2013//. 28:838                                                                           | Level 1, Form<br>Title/abstract<br>screen |
| 1472 | <b>Goodrich D.E.,Kilbourne A.M.,Nord K.M.,Bauer M.S.</b> . Mental health collaborative care and its role in primary care settings. <i>Current Psychiatry Reports</i> . 2013//. 15:383                                                                                                                    | Level 1, Form<br>Title/abstract<br>screen |
| 1474 | <b>Munizza C.,Argentero P.,Coppo A.,Tibaldi G.,Di Giannantonio M.,Picci R.L.,Rucci P.</b> . Public Beliefs and Attitudes towards Depression in Italy: A National Survey. <i>PLoS ONE</i> . 2013//. 8:e63806                                                                                              | Level 1, Form<br>Title/abstract<br>screen |
| 1479 | <b>Roberts B.M.</b> . The seeds of dual diagnosis discourse in an Australian state. <i>Mental Health and Substance Use: Dual Diagnosis</i> . 2013//. 6:325                                                                                                                                               | Level 1, Form<br>Title/abstract<br>screen |
| 1490 | <b>Antonov N.,Donitova V.,Sakharova G.</b> . Survey on smoking cessation among patients in hospitals. <i>European Respiratory Journal</i> . 2013//. 42:#pages#                                                                                                                                           | Level 1, Form<br>Title/abstract<br>screen |
| 1491 | <b>Anonymous.</b> . 5th International Congress on Psychopharmacology & International Symposium on Child and Adolescent Psychopharmacology. <i>Bulletin of Clinical Psychopharmacology</i> . 2013//. 23:S1                                                                                                | Level 1, Form<br>Title/abstract<br>screen |
| 1492 | <b>Balouch H.,Noott A.</b> . The therapeutic alliance between pharmacist and services users accessing substitute treatment for opiate addiction-keys to successful engagement and outcomes. <i>International Journal of Pharmacy Practice</i> . 2013//. 21:125                                           | Level 2, Form<br>Full Text<br>Screening   |
| 1493 | <b>Levy K.,Plard V.,Jeannin R.,Baubet T.,Reyre A.</b> . Addicts parents and their toddlers: A therapeutic approach using video. <i>Archives of Women's Mental Health</i> . 2013//. 16:S127                                                                                                               | Level 1, Form<br>Title/abstract<br>screen |
| 1494 | <b>Grote N.,Katon W.,Lohr M.J.</b> . Momcare: Culturally relevant treatment services for perinatal depression. <i>Archives of Women's Mental Health</i> . 2013//. 16:S4                                                                                                                                  | Level 1, Form<br>Title/abstract<br>screen |
| 1495 | <b>Graffi J.,Quoix E.,Molard A.,Bacque M.-F.</b> . Personality factors in adhesion to tobacco cessation after lung cancer diagnosis. <i>Psycho-Oncology</i> . 2013//. 22:348                                                                                                                             | Level 1, Form<br>Title/abstract           |

|      |                                                                                                                                                                                                                                                                                                                                 |                                           |
|------|---------------------------------------------------------------------------------------------------------------------------------------------------------------------------------------------------------------------------------------------------------------------------------------------------------------------------------|-------------------------------------------|
|      |                                                                                                                                                                                                                                                                                                                                 | screen                                    |
| 1496 | <b>Smith R.C.</b> . Intensive mental health training for medical residents. <i>Journal of General Internal Medicine</i> . 2013//. 28:S469                                                                                                                                                                                       | Level 1, Form<br>Title/abstract<br>screen |
| 1497 | <b>Sue K.,Simon R.E.,Sneh G.,Chaudhary M.J.,Zeidman J.,Cohen M.J.</b> . Development of a student-faculty collaborative clinic with a special focus on serving post-incarcerated patients. <i>Journal of General Internal Medicine</i> . 2013//. 28:S434                                                                         | Level 1, Form<br>Title/abstract<br>screen |
| 1498 | <b>Singh S.,Chang H.-Y.,Richards T.M.,Weiner J.,Clark J.M.,Segal J.B.</b> . Glucagon-like peptide-1-based therapies and risk of hospitalization for acute pancreatitis in type 2 diabetes: Population based matched case-control study. <i>Journal of General Internal Medicine</i> . 2013//. 28:S82                            | Level 1, Form<br>Title/abstract<br>screen |
| 1500 | <b>Simon S.R.,Checchi K.,McNair S.S.,Rubin A.,Marcello T.,Bickmore T.</b> . A pilot study of a computer-based relational agent to screen for substance-use problems in primary care. <i>Journal of General Internal Medicine</i> . 2013//. 28:S6                                                                                | Level 1, Form<br>Title/abstract<br>screen |
| 1501 | <b>Graham D.M.,Espin-Garcia O.,Brown C.,Halytskyy O.,Mahler M.,Pringle D.,Eng L.,Niu C.,Lam C.,Charow R.,Villeneuve J.,Shani R.M.,Tiessen K.,Howell D.,Jones J.M.,Alibhai S.M.H.,Xu W.,Liu G.</b> . Complementary and alternative medicine and other health behaviors. <i>Journal of Clinical Oncology</i> . 2013//. 31:#pages# | Level 1, Form<br>Title/abstract<br>screen |
| 1502 | <b>Schippers G.M.</b> . Benefits of patient-centred care in alcohol dependence. <i>European Neuropsychopharmacology</i> . 2013//. 23:S634                                                                                                                                                                                       | Level 2, Form<br>Full Text<br>Screening   |
| 1503 | <b>Di Paula B.A.,Menachery E.</b> . Pharmacist-physician collaborative care model for suboxone-maintained patients at a health department. <i>Journal of Pharmacy Practice</i> . 2013//. 26:305                                                                                                                                 | Level 1, Form<br>Title/abstract<br>screen |
| 1504 | <b>Crotwell S.M.,Brovko J.,Epstein E.,McCrary B.S.</b> . Studying client, partner, and therapist behavior in alcohol behavioral couple therapy: Relation among therapist common factors and change over time. <i>Alcoholism: Clinical and Experimental Research</i> . 2013//. 37:201A                                           | Level 2, Form<br>Full Text<br>Screening   |
| 1505 | <b>Agyemang L.,Dearing R.,Duerr M.,Maisto S.,Connors G.</b> . Therapeutic alliances and post-treatment health functioning following outpatient treatment for an alcohol use disorder. <i>Alcoholism: Clinical and Experimental Research</i> . 2013//. 37:145A                                                                   | Level 2, Form<br>Full Text<br>Screening   |
| 1506 | <b>Agyemang L.,Dearing R.,Duerr M.,Connors G.,Maisto S.</b> . Predictors of therapeutic alliance in the early phases of outpatient treatment for an alcohol use disorder. <i>Alcoholism: Clinical and Experimental Research</i> . 2013//. 37:144A                                                                               | Level 1, Form<br>Title/abstract<br>screen |
| 1507 | <b>Van Royen K.,Remmen R.,Vanmeerbeek M.,Peremans L.</b> . Collaborative care in the management of addiction to alcohol, illegal drugs, hypnotics and tranquilizers. A review. <i>European Journal of General Practice</i> . 2013//. 19:34                                                                                      | Level 1, Form<br>Title/abstract<br>screen |
| 1508 | <b>Chen K.L.,Ratanawongsa N.</b> . Room to improve: Infrequent use of behavior change counseling and patient-centered communication with diabetic patients in a safety net clinic. <i>Journal of Investigative Medicine</i> . 2013//. 61:127                                                                                    | Level 1, Form<br>Title/abstract<br>screen |
| 1509 | <b>Nambiar S.P.,Chand P.K.,Murthy P.,Suman L.N.</b> . Emotional and interpersonal themes in psychotherapy: Recognizing maintaining factors in men with substance use disorders. <i>Indian Journal of Psychiatry</i> . 2013//. 55:S103                                                                                           | Level 2, Form<br>Full Text<br>Screening   |
| 1510 | <b>Balhara,Dhal A.</b> . E-health: Expanding the horizons to address problem alcohol use in India. <i>Indian Journal of Psychiatry</i> . 2013//. 55:S12                                                                                                                                                                         | Level 1, Form<br>Title/abstract<br>screen |

|      |                                                                                                                                                                                                                                                                                                                             |                                           |
|------|-----------------------------------------------------------------------------------------------------------------------------------------------------------------------------------------------------------------------------------------------------------------------------------------------------------------------------|-------------------------------------------|
| 1511 | <b>Altman M.,Apter A.J.,Ginsburg K.,Naimi D.R.</b> Interviewing adolescents with asthma: Are we doing enough?. <i>Journal of Allergy and Clinical Immunology</i> . 2013//. 131:AB236                                                                                                                                        | Level 1, Form<br>Title/abstract<br>screen |
| 1512 | <b>Rosenberger J.G.,Stupiansky N.,Zimet G.D.,Weaver B.,Novak D.S.,Rosenthal S.</b> Health care utilization among a national sample of young men who have sex with men recruited from online social and sexual networks. <i>Journal of Adolescent Health</i> . 2013//. 52:S36                                                | Level 1, Form<br>Title/abstract<br>screen |
| 1513 | <b>Obradovic I.,Palle C.</b> How to improve the attractiveness of services for young drug users ? the benefits of focus group discussions. <i>Psychotropes (Belgium)</i> . 2012//. 18:77                                                                                                                                    | Level 1, Form<br>Title/abstract<br>screen |
| 1516 | <b>Khalily M.T.,Wota A.P.,Hallahan B.</b> Post-traumatic stress disorder (PTSD) symptoms in adults with psychiatric disorders. <i>Irish Journal of Psychological Medicine</i> . 2012//. 29:102                                                                                                                              | Level 1, Form<br>Title/abstract<br>screen |
| 1517 | <b>Simon G.E.,Imel Z.E.,Ludman E.J.,Steinfeld B.J.</b> Is dropout after a first psychotherapy visit always a bad outcome?. <i>Psychiatric Services</i> . 2012//. 63:705                                                                                                                                                     | Level 1, Form<br>Title/abstract<br>screen |
| 1518 | <b>Bowden C.L.,Perlis R.H.,Thase M.E.,Ketter T.A.,Ostacher M.M.,Calabrese J.R.,Reilly-Harrington N.A.,Gonzalez J.M.,Singh V.,Nierenberg A.A.,Sachs G.S.</b> Aims and Results of the NIMH Systematic Treatment Enhancement Program for Bipolar Disorder (STEP-BD). <i>CNS Neuroscience and Therapeutics</i> . 2012//. 18:243 | Level 1, Form<br>Title/abstract<br>screen |
| 1520 | <b>Servili C.</b> An international perspective on youth mental health: The role of primary health care and collaborative care models. <i>Journal of the Canadian Academy of Child and Adolescent Psychiatry</i> . 2012//. 21:127                                                                                            | Level 1, Form<br>Title/abstract<br>screen |
| 1522 | <b>Thor-Wiedemann S.,Wiedemann G.J.</b> Breast cancer prevention - State of the art. <i>Klinikerzt</i> . 2012//. 41:119                                                                                                                                                                                                     | Level 1, Form<br>Title/abstract<br>screen |
| 1524 | <b>Tallian K.B.,Hirsch J.D.,Kuo G.M.,Chang C.A.,Gilmer T.,Messinger M.,Chan P.,Daniels C.E.,Lee K.C.</b> Development of a pharmacist-psychiatrist collaborative medication therapy management clinic. <i>Journal of the American Pharmacists Association</i> . 2012//. 52:e252                                              | Level 1, Form<br>Title/abstract<br>screen |
| 1527 | <b>Bertakis K.D.,Azari R.</b> Patient-centered care: The influence of patient and resident physician gender and gender concordance in primary care. <i>Journal of Women's Health</i> . 2012//. 21:326                                                                                                                       | Level 1, Form<br>Title/abstract<br>screen |
| 1528 | <b>Gestuvo M.K.</b> Health maintenance in older adults: Combining evidence and individual preferences. <i>Mount Sinai Journal of Medicine</i> . 2012//. 79:560                                                                                                                                                              | Level 1, Form<br>Title/abstract<br>screen |
| 1534 | <b>Barnicot K.,Katsakou C.,Bhatti N.,Savill M.,Fearn N.,Priebe S.</b> Factors predicting the outcome of psychotherapy for borderline personality disorder: A systematic review. <i>Clinical Psychology Review</i> . 2012//. 32:400                                                                                          | Level 1, Form<br>Title/abstract<br>screen |
| 1536 | <b>Earl G.L.,Henstenburg J.A.</b> Dietary approaches to hypertension: A call to pharmacists to promote lifestyle changes. <i>Journal of the American Pharmacists Association</i> . 2012//. 52:637                                                                                                                           | Level 1, Form<br>Title/abstract<br>screen |
| 1539 | <b>Leib O.,Lutz-Vorderbrugge A.,Borner N.,Godderz W.,Clement T.,Bertram H.,Weber W.</b> Preventive measures and screening examinations in the elderly. <i>Pravention und Rehabilitation</i> . 2012//. 24:1                                                                                                                  | Level 1, Form<br>Title/abstract<br>screen |
| 1547 | <b>Bellino S.,Rinaldi C.,Brunetti C.,Bogetto F.</b> Interpersonal psychotherapy: Recent indications beyond major depression. <i>Journal of Psychopathology</i> . 2012//. 18:359                                                                                                                                             | Level 1, Form<br>Title/abstract<br>screen |

|      |                                                                                                                                                                                                                                                                                                                                                                                                                                                                                                                                                                                                                   |                                           |
|------|-------------------------------------------------------------------------------------------------------------------------------------------------------------------------------------------------------------------------------------------------------------------------------------------------------------------------------------------------------------------------------------------------------------------------------------------------------------------------------------------------------------------------------------------------------------------------------------------------------------------|-------------------------------------------|
| 1549 | <b>Feldman M.D.,Berkowitz S.A.</b> . Role of behavioral medicine in primary care. <i>Current Opinion in Psychiatry</i> . 2012//. 25:121                                                                                                                                                                                                                                                                                                                                                                                                                                                                           | Level 1, Form<br>Title/abstract<br>screen |
| 1551 | <b>Soler J.K.,Okkes I.,Oskam S.,van Boven K.,Zivotic P.,Jevtic M.,Dobbs F.,Lamberts H.,van Boven C.,Dijksterhuis P.H.,Groen A.,de Haan J.,Groot A.M.H.,Janssen D.,Polman T.A.L.,Polderman G.O.,Stolp K.E.I.,Valken N.,Veltman M.T.M.,Woerdeman M.,Calleja F.P.,Sammut C.,Sammut M.R.,Sammut D.,Bonnici J.,Buhagiar J.,Baldacchino A.</b> . An international comparative family medicine study of the transition project data from the Netherlands, Malta and Serbia. Is family medicine an international discipline? Comparing diagnostic odds ratios across populations. <i>Family Practice</i> . 2012//. 29:299 | Level 1, Form<br>Title/abstract<br>screen |
| 1552 | <b>Rafeyan R.</b> . Outcomes and cost effectiveness of collaborative care disease management approach in depression patients. <i>Journal of Managed Care Medicine</i> . 2012//. 15:10                                                                                                                                                                                                                                                                                                                                                                                                                             | Level 1, Form<br>Title/abstract<br>screen |
| 1553 | <b>Stepankova L.,Kalvachova M.,Kofiinkova I.</b> . Seminar for HPH coordinators (Health Promoting Hospitals) and WHO HPH Autumn School 2011 held in Prague. <i>Casopis Lekarů Ceskych</i> . 2012//. 151:149                                                                                                                                                                                                                                                                                                                                                                                                       | Level 1, Form<br>Title/abstract<br>screen |
| 1554 | <b>Hall K.,Gibbie T.,Lubman D.I.</b> . Motivational interviewing techniques: Facilitating behaviour change in the general practice setting. <i>Australian Family Physician</i> . 2012//. 41:660                                                                                                                                                                                                                                                                                                                                                                                                                   | Level 1, Form<br>Title/abstract<br>screen |
| 1560 | <b>Couteron J.</b> . The French network of consultations for young drug consumer. <i>Neuropsychiatrie de l'Enfance et de l'Adolescence</i> . 2012//. 60:S26                                                                                                                                                                                                                                                                                                                                                                                                                                                       | Level 2, Form<br>Full Text<br>Screening   |
| 1561 | <b>Van Dijk D.,Koeter M.W.J.,Hijman R.,Kahn R.S.,Van Den Brink W.</b> . Effect of cannabis use on the course of schizophrenia in male patients: A prospective cohort study. <i>Schizophrenia Research</i> . 2012//. 136:S372                                                                                                                                                                                                                                                                                                                                                                                      | Level 1, Form<br>Title/abstract<br>screen |
| 1562 | <b>Mallampati D.,Knudsen J.,Cohen M.J.,Cunningham J.,Lee C.-M.,Ticona L.,Ignacio R.B.,Bollman B.</b> . The crimson care collaborative chelsea clinic: Integrating medical, mental, and social healthcare for post-incarceration and urgent care patients in a student-faculty clinic. <i>Journal of General Internal Medicine</i> . 2012//. 27:S568                                                                                                                                                                                                                                                               | Level 1, Form<br>Title/abstract<br>screen |
| 1563 | <b>Consoli S.M.,Lemogne C.,Guelfi J.D.,Letessier L.,Nordmann J.-P.,Renard J.-P.,Estephan M.,Troy S.,Denis P.,Rouland J.-F.,Sellem E.</b> . Influence of motivational interviewing training on therapeutic alliance in glaucoma patients. <i>Psychosomatic Medicine</i> . 2012//. 74:A42                                                                                                                                                                                                                                                                                                                           | Level 1, Form<br>Title/abstract<br>screen |
| 1564 | <b>Kelehan M.</b> . The healthy lifestyle capacity building project for the remote physical activity workforce in Aboriginal communities across the Northern Territory, Australia. <i>Journal of Science and Medicine in Sport</i> . 2012//. 15:S258                                                                                                                                                                                                                                                                                                                                                              | Level 1, Form<br>Title/abstract<br>screen |
| 1565 | <b>Mann K.</b> . Nalmefene reduces alcohol consumption in alcohol dependent patients, results of randomized controlled trials in Europe. <i>Alcoholism: Clinical and Experimental Research</i> . 2012//. 36:18A                                                                                                                                                                                                                                                                                                                                                                                                   | Level 1, Form<br>Title/abstract<br>screen |
| 1566 | <b>Carstens C.,Wingenfeld S.,Tam K.</b> . The relationship between cultural competence, service use, and treatment outcomes. <i>Journal of Mental Health Policy and Economics</i> . 2012//. 15:S6                                                                                                                                                                                                                                                                                                                                                                                                                 | Level 1, Form<br>Title/abstract<br>screen |
| 1567 | <b>Lalonde L.,Goudreau J.,Hudon E.,Duhamel F.,Lussier M.T.,Bareil C.,Levesque L.,Ladouceur M.,Poirier N.,Milard A.</b> . TRANSIT: A primary care interprofessional intervention program to improve the management of cardiovascular risk factors in patients with multiple chronic conditions. <i>Journal of Population Therapeutics and Clinical Pharmacology</i> . 2012//. 19:e143                                                                                                                                                                                                                              | Level 1, Form<br>Title/abstract<br>screen |

|      |                                                                                                                                                                                                                                                                                                                                                                                     |                                           |
|------|-------------------------------------------------------------------------------------------------------------------------------------------------------------------------------------------------------------------------------------------------------------------------------------------------------------------------------------------------------------------------------------|-------------------------------------------|
| 1568 | <b>Le S.,Bull V.,Spring S.,Baharom A.,Paramanatham J.,Beswick L.,Mulley W.,Polkinghorne K.,Ratnam D.,Dev A.,Sievert W.,Pianko S.</b> Low rates of hepatitis C virus (HCV) treatment and seroclearance associated with reduced graft survival in renal transplant recipients in a single centre Australian cohort. <i>Journal of Gastroenterology and Hepatology</i> . 2012//. 27:83 | Level 1, Form<br>Title/abstract<br>screen |
| 1569 | <b>Bird L.,Longo R.,Hocking A.,Watson F.,Joubert L.</b> Aboriginal cancer care at peter MAC: Connecting and responding (ACCAP). <i>Journal of Thoracic Oncology</i> . 2012//. 7:S159                                                                                                                                                                                                | Level 1, Form<br>Title/abstract<br>screen |
| 1570 | <b>Lalonde L.,Bareil C.,Lussier M.-T.,Goudreau J.,Hudon E.</b> TRANSIT: Improving interprofessional management of cardiovascular risk in primary care. <i>Canadian Pharmacists Journal</i> . 2012//. 145:S45                                                                                                                                                                        | Level 1, Form<br>Title/abstract<br>screen |
| 1571 | <b>Nirenberg T.D.,Baird J.,Longabaugh R.,Mello M.J.</b> Mi-based intervention may decrease the lie: Self reported pretreatment audit scores of court referred youth increase after they receive MI. <i>Alcoholism: Clinical and Experimental Research</i> . 2012//. 36:238A                                                                                                         | Level 1, Form<br>Title/abstract<br>screen |
| 1572 | <b>Paves A.P.,Hsu S.H.,Liu J.,Lostutter T.W.</b> Acculturation, peer drinking, protective behaviors, and alcoholrelated problems in asian and pacific islander american college students: A path model. <i>Alcoholism: Clinical and Experimental Research</i> . 2012//. 36:221A                                                                                                     | Level 1, Form<br>Title/abstract<br>screen |
| 1573 | <b>Blom A.,Cloete M.,Hendricks N.,Joubert B.,Roux S.,Barnard R.,Snell C.,Marais A.-S.,Seedat S.,Gossage J.P.,Blankenship J.,May P.A.</b> High risk pregnant women and case management: Efficacy of prevention in a community with the highest fetal alcohol syndrome prevalence in the world. <i>Alcoholism: Clinical and Experimental Research</i> . 2012//. 36:213A               | Level 1, Form<br>Title/abstract<br>screen |
| 1574 | <b>Epstein E.E.,McCrary B.S.,Hildebrandt T.,Jensen N.,Cook S.,Gaba A.</b> Preliminary efficacy of a single gender female-specific cognitivebehavioral therapy (CBT) group therapy for alcohol dependent women. <i>Alcoholism: Clinical and Experimental Research</i> . 2012//. 36:159A                                                                                              | Level 1, Form<br>Title/abstract<br>screen |
| 1575 | <b>Stasiewicz P.R.,Bradizza C.M.</b> Identifying multiple mechanisms of change in alcoholism treatment. <i>Alcoholism: Clinical and Experimental Research</i> . 2012//. 36:158A                                                                                                                                                                                                     | Level 2, Form<br>Full Text<br>Screening   |
| 1576 | <b>Khorsandi P.,Dopheide J.A.</b> Psychiatric pharmacist management of depression in patients with diabetes. <i>Journal of Pharmacy Practice</i> . 2012//. 25:289                                                                                                                                                                                                                   | Level 1, Form<br>Title/abstract<br>screen |
| 1577 | <b>Flaherty L.T.</b> School-based interventions as part of the therapeutic alliance. <i>Adolescent Psychiatry</i> . 2012//. 2:105                                                                                                                                                                                                                                                   | Level 1, Form<br>Title/abstract<br>screen |
| 1578 | <b>Lewis D.,Osmar K.</b> Interprofessional collaboration in the creation and standardization of patient assessment and documentation for radiation therapy. <i>Journal of Medical Imaging and Radiation Sciences</i> . 2012//. 43:S57                                                                                                                                               | Level 1, Form<br>Title/abstract<br>screen |
| 1579 | <b>Salvo M.C.,Nigro S.C.</b> Cardiometabolic disease: (part1) the pharmacist's tools for managing dyslipidemia and hypertension. <i>Drug Topics</i> . 2011//. 155:25                                                                                                                                                                                                                | Level 1, Form<br>Title/abstract<br>screen |
| 1584 | <b>Brown P.,Kritzler R.,Petryna M.,Polley C.M.,Tietze K.J.,Binaso K.A.,Watson L.,Ellis W.M.,Blum B.M.,Cummings J.,Sullivan M.,Fitch M.L.,Belknap B.</b> White paper on expanding the role of pharmacists in chronic obstructive pulmonary disease. <i>Journal of the American Pharmacists Association</i> . 2011//. 51:203                                                          | Level 1, Form<br>Title/abstract<br>screen |
| 1587 | <b>Farro S.A.,Clark C.,Hopkins Eyles C.</b> Assessing trauma-informed care                                                                                                                                                                                                                                                                                                          | Level 1, Form                             |

|      |                                                                                                                                                                                                                                                                                                                        |                                     |
|------|------------------------------------------------------------------------------------------------------------------------------------------------------------------------------------------------------------------------------------------------------------------------------------------------------------------------|-------------------------------------|
|      | readiness in behavioral health: An organizational case study. <i>Journal of Dual Diagnosis</i> . 2011//. 7:228                                                                                                                                                                                                         | Title/abstract screen               |
| 1588 | <b>Kellogg S.H.,Tatarsky A.</b> Re-envisioning addiction treatment: A six-point plan. <i>Alcoholism Treatment Quarterly</i> . 2011//. 30:109                                                                                                                                                                           | Level 1, Form Title/abstract screen |
| 1590 | <b>Tsosie U.,Nannauck S.,Buchwald D.,Russo J.,Trusz S.G.,Foy H.,Zatzick D.</b> Staying connected: A feasibility study linking American Indian and Alaska native trauma survivors to their tribal communities. <i>Psychiatry</i> . 2011//. 74:349                                                                       | Level 1, Form Title/abstract screen |
| 1600 | <b>Muzik M.,Thelen K.,Rosenblum K.L.</b> Perinatal depression: Detection and treatment. <i>Neuropsychiatry</i> . 2011//. 1:179                                                                                                                                                                                         | Level 1, Form Title/abstract screen |
| 1606 | <b>Campo R.A.,Rowland J.H.,Irwin M.L.,Nathan P.C.,Gritz E.R.,Kinney A.Y.</b> Cancer prevention after cancer: Changing the paradigm - A report from the american society of preventive oncology. <i>Cancer Epidemiology Biomarkers and Prevention</i> . 2011//. 20:2317                                                 | Level 1, Form Title/abstract screen |
| 1608 | <b>Diener M.J.,Monroe J.M.</b> The relationship between adult attachment style and therapeutic alliance in individual psychotherapy: A meta-analytic review. <i>Psychotherapy</i> . 2011//. 48:237                                                                                                                     | Level 1, Form Title/abstract screen |
| 1613 | <b>Perestelo-Perez L.,Gonzalez-Lorenzo M.,Perez-Ramos J.,Rivero-Santana A.,Serrano-Aguilar P.</b> Patient involvement and shared decision-making in mental health care. <i>Current Clinical Pharmacology</i> . 2011//. 6:83                                                                                            | Level 1, Form Title/abstract screen |
| 1614 | <b>Tibaldi G.,Salvador-Carulla L.,Garcia-Gutierrez J.C.</b> From treatment adherence to advanced shared decision making: New professional strategies and attitudes in mental health care. <i>Current Clinical Pharmacology</i> . 2011//. 6:91                                                                          | Level 1, Form Title/abstract screen |
| 1619 | <b>Woltmann E.M.,Wilkniss S.M.,Teachout A.,McHugo G.J.,Drake R.E.</b> Trial of an electronic decision support system to facilitate shared decision making in community mental health. <i>Psychiatric Services</i> . 2011//. 62:54                                                                                      | Level 1, Form Title/abstract screen |
| 1621 | <b>Chawla N.</b> A multiple-behavior lifestyle intervention for cancer patients and their families delivered in a community-based oncological and hematologic treatment clinic. <i>Journal of Family Psychotherapy</i> . 2011//. 22:74                                                                                 | Level 1, Form Title/abstract screen |
| 1622 | <b>Fortune Z.,Barrett B.,Armstrong D.,Coid J.,Crawford M.,Mudd D.,Rose D.,Slade M.,Spence R.,Tyrer P.,Moran P.</b> Clinical and economic outcomes from the UK pilot psychiatric services for personality-disordered offenders. <i>International Review of Psychiatry</i> . 2011//. 23:61                               | Level 1, Form Title/abstract screen |
| 1623 | <b>Brinkhaus B.,Lewith G.,Rehberg B.,Heusser P.,Cummings M.,Michalsen A.,Teut M.,Willich S.N.,Irnich D.</b> How to treat a patient with chronic low back pain - Methodology and results of the first international case conference of integrative medicine. <i>Complementary Therapies in Medicine</i> . 2011//. 19:54 | Level 1, Form Title/abstract screen |
| 1624 | <b>Tsai J.,O'Connell M.,KasproW J.,Rosenheck R.A.</b> Factors related to rapidity of housing placement in housing and Urban Development-Department of Veterans affairs supportive housing program of 1990s. <i>Journal of Rehabilitation Research and Development</i> . 2011//. 48:755                                 | Level 1, Form Title/abstract screen |
| 1626 | <b>Gittins H.,Patel S.,Ennals G.,Plant J.,Redfern J.,Shober M.,Collins A.,Nazareth D.,Davies L.</b> Smoking cessation advice (SCA) and referral: Do we need to further educate healthcare professionals?. <i>European Respiratory Journal</i> . 2011//. 38:#pages#                                                     | Level 1, Form Title/abstract screen |
| 1627 | <b>Tan R.,Su A.,Hendriks M.M.,Mahendran R.</b> Collaborative care for improving the clinical outcomes of patients with psychiatric conditions. <i>Annals of the Academy of Medicine Singapore</i> . 2011//. 40:S199                                                                                                    | Level 1, Form Title/abstract screen |



|      |                                                                                                                                                                                                                                                                                                            |                                     |
|------|------------------------------------------------------------------------------------------------------------------------------------------------------------------------------------------------------------------------------------------------------------------------------------------------------------|-------------------------------------|
| 1628 | <b>Dalkilic A.</b> Psychopharmacological treatments in eating disorders. <i>Klinik Psikofarmakoloji Bulteni</i> . 2011//. 21:S93                                                                                                                                                                           | Level 1, Form Title/abstract screen |
| 1629 | <b>DiPaula B.A.,Park D.</b> Collaborative drug therapy management for buprenorphine-maintained patients. <i>Journal of Pharmacy Practice</i> . 2011//. 24:280                                                                                                                                              | Level 1, Form Title/abstract screen |
| 1630 | <b>Elfrink M.</b> ACT and Recovery: A new perspective on treatment for early psychosis. The first 3 years: Qualitative and quantitative data. <i>European Archives of Psychiatry and Clinical Neuroscience</i> . 2011//. 261:S33                                                                           | Level 1, Form Title/abstract screen |
| 1631 | <b>Von Sternberg K.,Velasquez M.M.,Ingersoll K.,Green C.,Hetteima J.,Wagner C.</b> Using latent profile analyses to examine key components of an evidence-based intervention to reduce alcohol-exposed pregnancy: Project choices. <i>Alcoholism: Clinical and Experimental Research</i> . 2011//. 35:145A | Level 1, Form Title/abstract screen |
| 1632 | <b>Urbanoski K.A.,Kelly J.F.,Hoepfner B.B.,Slaymaker V.</b> The influence of therapeutic alliance on treatment response and outcome among young adults in residential substance use disorder treatment. <i>Alcoholism: Clinical and Experimental Research</i> . 2011//. 35:84A                             | Level 1, Form Title/abstract screen |
| 1633 | <b>Yousif O.E.,Ibrahim A.S.</b> TB/HIV among patients attending referred clinics in Shaab Hospital, Khartoum. <i>Annals of Thoracic Medicine</i> . 2011//. 6:182                                                                                                                                           | Level 1, Form Title/abstract screen |
| 1635 | <b>Iliopoulou L.,Koutras V.,Kominou K.,Fidi E.,Gonta S.,Basogianni V.</b> The management of relapse in an outpatient program for heroin user by administration of naltrexone. <i>European Psychiatry</i> . 2011//. 26:#pages#                                                                              | Level 2, Form Full Text Screening   |
| 1636 | <b>Ortega L.,Robles N.,Matrai S.,Gual A.</b> The e-mail as a potential therapeutic tool in patients with alcohol dependence: The patient's perspective. <i>European Psychiatry</i> . 2011//. 26:#pages#                                                                                                    | Level 1, Form Title/abstract screen |
| 1637 | <b>Mcquaid J.,Slater M.,Golish M.,Parkes K.,Chircop-Rollick T.,Rutledge T.,Cone R.,Peterzell D.,Atkinson J.,Nance P.</b> Visual and psychosocial feedback intervention for phantom limb pain: Participant characteristics. <i>Journal of Pain</i> . 2011//. 12:P76                                         | Level 1, Form Title/abstract screen |
| 1638 | <b>Leucht S.</b> Psychoeducation and shared decision making as a way to reduce non-compliance in mental disorders. <i>European Neuropsychopharmacology</i> . 2011//. 21:S109                                                                                                                               | Level 1, Form Title/abstract screen |
| 1639 | <b>Robards F.,Jarrett C.,Bennett D.</b> Resources to support psychosocial assessments with young people. <i>Journal of Adolescent Health</i> . 2011//. 48:S97                                                                                                                                              | Level 1, Form Title/abstract screen |
| 1655 | <b>Bertakis K.D.</b> The influence of gender on the doctor-patient interaction. <i>Patient Education and Counseling</i> . 2009//. 76:356                                                                                                                                                                   | Level 1, Form Title/abstract screen |
| 1658 | <b>Kreyenbuhl J.,Nossel I.R.,Dixon L.B.</b> Disengagement from mental health treatment among individuals with schizophrenia and strategies for facilitating connections to care: A review of the literature. <i>Schizophrenia Bulletin</i> . 2009//. 35:696                                                | Level 1, Form Title/abstract screen |
| 1659 | <b>Gold S.H.,Hilsenroth M.J.</b> Effects of graduate clinicians' personal therapy on therapeutic alliance. <i>Clinical Psychology and Psychotherapy</i> . 2009//. 16:159                                                                                                                                   | Level 1, Form Title/abstract screen |
| 1660 | <b>Wisnivesky J.P.,Kattan M.,Evans D.,Leventhal H.,Musumeci-Szabo T.J.,McGinn T.,Halm E.A.</b> Assessing the relationship between language proficiency and asthma morbidity among inner-city asthmatics. <i>Medical Care</i> .                                                                             | Level 1, Form Title/abstract screen |

|      |                                                                                                                                                                                                                                                                                           |                                           |
|------|-------------------------------------------------------------------------------------------------------------------------------------------------------------------------------------------------------------------------------------------------------------------------------------------|-------------------------------------------|
|      | 2009//. 47:243                                                                                                                                                                                                                                                                            |                                           |
| 1662 | <b>Despland J.-N.</b> . Which psychotherapy for which patient? Research data and clinical issues. <i>Psychotropes</i> . 2010//. 16:9                                                                                                                                                      | Level 1, Form<br>Title/abstract<br>screen |
| 1665 | <b>Hohman M.,Roads L.,Corbett R.</b> . Initial validation of a subtle trauma symptom screening scale embedded in a needs assessment given to women entering drug treatment. <i>Journal of Dual Diagnosis</i> . 2010//. 6:2                                                                | Level 1, Form<br>Title/abstract<br>screen |
| 1668 | <b>Mammucari M.,Fiore M.,Geppetti P.</b> . Opioids prescription: The art of the two-way communication. <i>Trends in Medicine</i> . 2010//. 10:135                                                                                                                                         | Level 1, Form<br>Title/abstract<br>screen |
| 1669 | <b>Webb C.A.,DeRubeis R.J.,Barber J.P.</b> . Therapist Adherence/Competence and Treatment Outcome: A Meta-Analytic Review. <i>Journal of Consulting and Clinical Psychology</i> . 2010//. 78:200                                                                                          | Level 1, Form<br>Title/abstract<br>screen |
| 1670 | <b>Krones T.,Keller H.,Becker A.,Sonnichsen A.,Baum E.,Donner-Banzhoff N.</b> . The theory of planned behaviour in a randomized trial of a decision aid on cardiovascular risk prevention. <i>Patient Education and Counseling</i> . 2010//. 78:169                                       | Level 1, Form<br>Title/abstract<br>screen |
| 1671 | <b>McKinney K.A.,Greenfield B.G.</b> . Self-compliance at 'Prozac campus'. <i>Anthropology and Medicine</i> . 2010//. 17:173                                                                                                                                                              | Level 1, Form<br>Title/abstract<br>screen |
| 1673 | <b>Angstman K.B.,DeJesus R.S.,Rohrer J.E.</b> . Correlation between mental health comorbidity screening scores and clinical response in collaborative care treatment for depression. <i>Mental Health in Family Medicine</i> . 2010//. 7:129                                              | Level 1, Form<br>Title/abstract<br>screen |
| 1675 | <b>Hauser W.</b> . Fibromyalgia syndrome (FMS). <i>DoctorConsult - The Journal. Wissen fur Klinik und Praxis</i> . 2010//. 1:e93                                                                                                                                                          | Level 1, Form<br>Title/abstract<br>screen |
| 1676 | <b>Kotwani A.,Wattal C.,Katewa S.,Joshic P.C.,Holloway K.</b> . Factors influencing primary care physicians to prescribe antibiotics in Delhi India. <i>Family Practice</i> . 2010//. 27:684                                                                                              | Level 1, Form<br>Title/abstract<br>screen |
| 1679 | <b>Calabro K.S.,Costello T.C.,Prokhorov A.V.</b> . Denormalization of tobacco use and the role of the pediatric health-care provider. <i>Pediatric, Allergy, Immunology, and Pulmonology</i> . 2010//. 23:273                                                                             | Level 1, Form<br>Title/abstract<br>screen |
| 1683 | <b>Ozanne E.,Esserman L.</b> . Decision making in breast cancer prevention. <i>Psicooncologia</i> . 2010//. 7:299                                                                                                                                                                         | Level 1, Form<br>Title/abstract<br>screen |
| 1684 | <b>Bamatter W.,Carroll K.M.,Anez L.M.,Paris M.,Ball S.A.,Nich C.,Frankforter T.L.,Suarez-Morales L.,Szapocznik J.,Martino S.</b> . Informal discussions in substance abuse treatment sessions with Spanish-speaking clients. <i>Journal of Substance Abuse Treatment</i> . 2010//. 39:353 | Level 1, Form<br>Title/abstract<br>screen |
| 1687 | <b>Bremmon K.E.,La Barge R.A.</b> . Evaluation of a unique collaborative practice model for tobacco cessation in a veteran population. <i>Pharmacotherapy</i> . 2010//. 30:462e                                                                                                           | Level 1, Form<br>Title/abstract<br>screen |
| 1688 | <b>Sajatovic M.</b> . Enhancing treatment adherence: A patient-centered approach. <i>Bipolar Disorders</i> . 2010//. 12:48                                                                                                                                                                | Level 1, Form<br>Title/abstract<br>screen |
| 1689 | <b>Lalonde L.,Belanger D.,Duhamel F.,Goudreau J.,Hudon E.,Lussier M.-T.,Martin E.,Levesque L.</b> . Preventing cardiovascular disease in primary care: Priorities for action. <i>Journal of Population Therapeutics and Clinical</i>                                                      | Level 1, Form<br>Title/abstract<br>screen |

|      |                                                                                                                                                                                                                                                                                                         |                                     |
|------|---------------------------------------------------------------------------------------------------------------------------------------------------------------------------------------------------------------------------------------------------------------------------------------------------------|-------------------------------------|
|      | <i>Pharmacology</i> . 2010//. 17:e115                                                                                                                                                                                                                                                                   |                                     |
| 1690 | <b>Jacobsen B.,Elfrink M.B.,Gijsman H.J.</b> . Collaboration works! Remission and recovery in ACT for early psychosis. <i>Early Intervention in Psychiatry</i> . 2010//. 4:180                                                                                                                          | Level 1, Form Title/abstract screen |
| 1691 | <b>Gent L.C.,Garson J.K.,Dundon W.D.,Courtright L.E.,Pettinati H.M.,Oslin D.W.</b> . A comparison of CBI therapist and MM clinician ratings of the therapeutic alliance in the treatment of alcohol dependent clients. <i>Alcoholism: Clinical and Experimental Research</i> . 2010//. 34:226A          | Level 2, Form Full Text Screening   |
| 1692 | <b>Garson J.K.,Gent L.C.,Dundon W.D.,Courtright L.E.,Pettinati H.M.,Oslin D.W.</b> . Further evidence supporting the relationship of the therapeutic alliance and treatment outcome when utilizing medical-based interventions. <i>Alcoholism: Clinical and Experimental Research</i> . 2010//. 34:226A | Level 2, Form Full Text Screening   |
| 1693 | <b>Tonigan J.S.,Rice S.L.</b> . The importance of early impressions about AA usefulness for later abstinence. <i>Alcoholism: Clinical and Experimental Research</i> . 2010//. 34:174A                                                                                                                   | Level 1, Form Title/abstract screen |
| 1694 | <b>Mahone I.,Mistler L.</b> . Shared decision making in medication use: An emerging best practice in mental health. <i>European Psychiatry</i> . 2010//. 25:#pages#                                                                                                                                     | Level 1, Form Title/abstract screen |
| 1695 | <b>De Fruyt J.,Axters M.,Haspeslagh M.,Demyttenaere K.</b> . Decision making capacity in patients admitted to a psychiatric emergency service: A field trial. <i>European Psychiatry</i> . 2010//. 25:#pages#                                                                                           | Level 1, Form Title/abstract screen |
| 1696 | <b>Moczygamba L.,Matzke G.,Gatewood S.,Alexander A.,Kennedy A.,Osborn R.,Goode J.,Reynolds-Cane D.</b> . Development of a clinical pharmacy services provider network for homeless patients. <i>Journal of the American Pharmacists Association</i> . 2010//. 50:275                                    | Level 1, Form Title/abstract screen |
| 1697 | <b>Gatewood S.,Alexander A.,Osborn R.,Kennedy A.,Goode J.,Matzke G.,Reynolds-Cane D.</b> . Expansion of clinical pharmacy services in an underserved population through an academic-community partnership. <i>Journal of the American Pharmacists Association</i> . 2010//. 50:268                      | Level 1, Form Title/abstract screen |
| 1698 | <b>Chartier F.,Rouillon F.,Lukasiewicz M.,Kraemer S.,D'yachkova Y.</b> . Effectiveness of olanzapine standard oral and orally disintegrating tablets in a 1-year European observational study. <i>European Neuropsychopharmacology</i> . 2010//. 20:S508                                                | Level 1, Form Title/abstract screen |
| 1699 | <b>Richardson D.F.,Adamson S.J.,Deering D.E.A.</b> . The role of therapeutic alliance in treatment for people with mild to moderate alcohol dependence. <i>Alcoholism: Clinical and Experimental Research</i> . 2010//. 34:169A                                                                         | Level 2, Form Full Text Screening   |
| 1701 | <b>Kilbourne A.M.,Biswas K.,Pirraglia P.A.,Sajatovic M.,Williford W.O.,Bauer M.S.</b> . Is the collaborative chronic care model effective for patients with bipolar disorder and co-occurring conditions?. <i>Journal of Affective Disorders</i> . 2009//. 112:256                                      | Level 1, Form Title/abstract screen |
| 1707 | <b>Bass C.,Jones D.P.H.</b> . Fabricated or induced illness: assessment of perpetrators and approaches to management. <i>Psychiatry</i> . 2009//. 8:158                                                                                                                                                 | Level 1, Form Title/abstract screen |
| 1710 | <b>Joe G.W.,Simpson D.D.,Rowan-Szal G.A.</b> . Interaction of counseling rapport and topics discussed in sessions with methadone treatment clients. <i>Substance Use and Misuse</i> . 2009//. 44:3                                                                                                      | Level 2, Form Full Text Screening   |
| 1711 | <b>Phan O.,Lascaux M.</b> . Motivational interviews with cannabis dependant adolescents. <i>Annales Medico-Psychologiques</i> . 2009//. 167:523                                                                                                                                                         | Level 2, Form Full Text Screening   |

|      |                                                                                                                                                                                                                                                                                                                                              |                                           |
|------|----------------------------------------------------------------------------------------------------------------------------------------------------------------------------------------------------------------------------------------------------------------------------------------------------------------------------------------------|-------------------------------------------|
| 1713 | <b>Salous A.,Omar H.A.</b> . Substance abuse among adolescents: A cross-cultural review. <i>International Journal on Disability and Human Development</i> . 2009//. 8:155                                                                                                                                                                    | Level 1, Form<br>Title/abstract<br>screen |
| 1715 | <b>Anstiss T.</b> . Motivational interviewing in primary care. <i>Journal of Clinical Psychology in Medical Settings</i> . 2009//. 16:87                                                                                                                                                                                                     | Level 1, Form<br>Title/abstract<br>screen |
| 1718 | <b>Vannoy S.D.,Areal P.,Unutzer J.D.</b> . The use of depression free days for tracking late-life depression outcomes. <i>American Journal of Geriatric Psychiatry</i> . 2009//. 17:A98                                                                                                                                                      | Level 1, Form<br>Title/abstract<br>screen |
| 1719 | <b>Chandler G.M.,Cowperthwait C.M.,Hay A.C.,Sylvia L.G.,Ostacher M.J.,Nierenberg A.A.,Perlis R.H.,Sachs G.S.</b> . Anxiety or irritability can lead to misdiagnosis of bipolar disorder: Results from systematic consultations at the MGH collaborative care initiative (CCI) consultation service. <i>Bipolar Disorders</i> . 2009//. 11:28 | Level 1, Form<br>Title/abstract<br>screen |
| 1720 | <b>Houck J.M.,Manuel J.K.,Pyeatt C.J.,Moyers T.B.,Montoya V.L.</b> . A new scale to assess barriers to adopting motivational interviewing. <i>Alcoholism: Clinical and Experimental Research</i> . 2009//. 33:137A                                                                                                                           | Level 1, Form<br>Title/abstract<br>screen |
| 1721 | <b>Newman A.,Beckstead S.,Finch S.,Knorr T.,Lynch C.,MacKenzie M.,Robertson R.,Shore R.</b> . Hepatitis C treatment of a marginalized population: A multi-disciplinary primary practitioner-led treatment model in practice. <i>Canadian Journal of Gastroenterology</i> . 2009//. 23:#pages#                                                | Level 1, Form<br>Title/abstract<br>screen |
| 1722 | <b>Martins M.,Castro L.C.</b> . Comorbid borderline personality disorder and alcohol use disorder: A case of combined psychotherapeutic and pharmacotherapeutic interventions. <i>European Psychiatry</i> . 2009//. 24:S407                                                                                                                  | Level 2, Form<br>Full Text<br>Screening   |
| 1741 | <b>Stergiopoulos V.,Dewa C.S.,Rouleau K.,Yoder S.,Chau N.</b> . Collaborative mental health care for the homeless: The role of psychiatry in positive housing and mental health outcomes. <i>Canadian Journal of Psychiatry</i> . 2008//. 53:61                                                                                              | Level 1, Form<br>Title/abstract<br>screen |
| 1743 | <b>Yohannes A.M.</b> . Management of anxiety and depression in patients with COPD. <i>Expert Review of Respiratory Medicine</i> . 2008//. 2:337                                                                                                                                                                                              | Level 1, Form<br>Title/abstract<br>screen |
| 1745 | <b>Trinh N.-H.,Moore D.,Brendel D.H.</b> . Ethics consultation to PACT teams: Balancing client autonomy and clinical necessity. <i>Harvard Review of Psychiatry</i> . 2008//. 16:365                                                                                                                                                         | Level 1, Form<br>Title/abstract<br>screen |
| 1746 | <b>Davis P.,Abou-Saleh M.T.</b> . Developing an enhanced counseling intervention for the primary prevention of hepatitis C among injecting drug users. <i>Addictive Disorders and their Treatment</i> . 2008//. 7:65                                                                                                                         | Level 1, Form<br>Title/abstract<br>screen |
| 1747 | <b>Holmes-Rovner M.,Stommel M.,Corser W.D.,Olomu A.,Holtrop J.S.,Siddiqi A.,Dunn S.L.</b> . Does outpatient telephone coaching add to hospital quality improvement following hospitalization for acute coronary syndrome?. <i>Journal of General Internal Medicine</i> . 2008//. 23:1464                                                     | Level 1, Form<br>Title/abstract<br>screen |
| 1751 | <b>Singh A.N.,Strand P.S.</b> . A person-centered, strength-based treatment of aggression and sexually inappropriate behavior in mental health. <i>Clinical Case Studies</i> . 2008//. 7:397                                                                                                                                                 | Level 1, Form<br>Title/abstract<br>screen |
| 1753 | <b>Barber J.P.,Gallop R.,Crits-Christoph P.,Barrett M.S.,Klostermann S.,McCarthy K.S.,Sharpless B.A.</b> . THE ROLE OF THE ALLIANCE AND TECHNIQUES IN PREDICTING OUTCOME OF SUPPORTIVE-EXPRESSIVE DYNAMIC THERAPY FOR COCAINE DEPENDENCE. <i>Psychoanalytic Psychology</i> . 2008//. 25:461                                                  | Level 2, Form<br>Full Text<br>Screening   |
| 1755 | <b>Bonsack C.,Montagrin Y.,Gibellini S.,Favrod J.,Besson J.,Conus P.</b>                                                                                                                                                                                                                                                                     | Level 2, Form                             |

|      |                                                                                                                                                                                                                                                                               |                                     |
|------|-------------------------------------------------------------------------------------------------------------------------------------------------------------------------------------------------------------------------------------------------------------------------------|-------------------------------------|
|      | Practice of a motivational intervention for cannabis users with psychosis. <i>Schweizer Archiv fur Neurologie und Psychiatrie</i> . 2008//. 159:378                                                                                                                           | Full Text Screening                 |
| 1756 | <b>Haskard K.B.,Williams S.L.,DiMatteo M.R.,Rosenthal R.,White M.K.,Goldstein M.G.</b> . Physician and Patient Communication Training in Primary Care: Effects on Participation and Satisfaction. <i>Health Psychology</i> . 2008//. 27:513                                   | Level 1, Form Title/abstract screen |
| 1757 | <b>Henderson D.</b> . Improving adherence: How far have we come?. <i>European Neuropsychopharmacology</i> . 2008//. 18:S590                                                                                                                                                   | Level 1, Form Title/abstract screen |
| 1762 | <b>Ambresin G.,de Roten Y.,Drapeau M.,Despland J.-N.</b> . Early change in maladaptive defence style and development of therapeutic alliance. <i>Clinical Psychology and Psychotherapy</i> . 2007//. 14:89                                                                    | Level 1, Form Title/abstract screen |
| 1766 | <b>Angell B.,Martinez N.I.,Mahoney C.A.,Corrigan P.W.</b> . Payeeship, financial leverage, and the client-provider relationship. <i>Psychiatric Services</i> . 2007//. 58:365                                                                                                 | Level 1, Form Title/abstract screen |
| 1770 | <b>Mendez V. J.C.,Maluenda M. R.,Loo T. X.,Isla P. R.,Anza A.</b> . Therapeutic alliance in addict patients of two institutions of Antofagasta. <i>Revista Chilena de Neuro-Psiquiatria</i> . 2007//. 45:141                                                                  | Level 1, Form Title/abstract screen |
| 1772 | <b>Bricker J.B.,Russo J.,Stein M.B.,Sherbourne C.,Craske M.,Schraufnagel T.J.,Roy-Byrne P.</b> . Does occasional cannabis use impact anxiety and depression treatment outcomes? Results from a randomized effectiveness trial. <i>Depression and Anxiety</i> . 2007//. 24:392 | Level 1, Form Title/abstract screen |
| 1773 | <b>Stawicki S.,Krampe H.,Niehaus S.,Ribbe K.,Wagner T.,Bartels C.,Kroner-Herwig B.,Ehrenreich H.</b> . Multimodal monitoring of psychotherapeutic processes in the treatment of alcohol dependent patients. <i>Suchtmedizin in Forschung und Praxis</i> . 2007//. 9:27        | Level 2, Form Full Text Screening   |
| 1774 | <b>Anonymous.</b> Part A: Treatment recommendations for patients with substance use disorders. <i>American Journal of Psychiatry</i> . 2007//. 164:5                                                                                                                          | Level 2, Form Full Text Screening   |
| 1776 | <b>Wiederholt P.A.,Connor N.P.,Hartig G.K.,Harari P.M.</b> . Bridging Gaps in Multidisciplinary Head and Neck Cancer Care: Nursing Coordination and Case Management. <i>International Journal of Radiation Oncology Biology Physics</i> . 2007//. 69:S88                      | Level 1, Form Title/abstract screen |
| 1777 | <b>Huguelet P.</b> . Recovery as an organising principle for the care of patients with severe mental disorders. <i>Schweizer Archiv fur Neurologie und Psychiatrie</i> . 2007//. 158:271                                                                                      | Level 1, Form Title/abstract screen |
| 1780 | <b>Teplin D.</b> . Substance dependence and personality disorders: What's the deal?. <i>Journal of Opioid Management</i> . 2007//. 3:242                                                                                                                                      | Level 1, Form Title/abstract screen |
| 1783 | <b>Mann B.J.,Grana W.A.,Indelicato P.A.,O'Neill D.F.,George S.Z.</b> . A survey of sports medicine physicians regarding psychological issues in patient-athletes. <i>American Journal of Sports Medicine</i> . 2007//. 35:2140                                                | Level 1, Form Title/abstract screen |
| 1785 | <b>Rastogi M.,Wadhwa S.</b> . Substance abuse among Asian Indians in the United States: A consideration of cultural factors in etiology and treatment. <i>Substance Use and Misuse</i> . 2006//. 41:1239                                                                      | Level 1, Form Title/abstract screen |
| 1790 | <b>Swann A.C.</b> . Long-term treatment in bipolar disorder. <i>Journal of Clinical Psychiatry</i> . 2005//. 66:7                                                                                                                                                             | Level 1, Form Title/abstract screen |

|      |                                                                                                                                                                                                                                                                                                                                                                      |                                           |
|------|----------------------------------------------------------------------------------------------------------------------------------------------------------------------------------------------------------------------------------------------------------------------------------------------------------------------------------------------------------------------|-------------------------------------------|
| 1791 | <b>Hensley R.D.,Jones A.K.,Williams A.G.,Willsher L.B.,Cain P.P.</b> . One-year clinical outcomes for Louisiana residents diagnosed with type 2 diabetes and hypertension. <i>Journal of the American Academy of Nurse Practitioners</i> . 2005//. 17:363                                                                                                            | Level 1, Form<br>Title/abstract<br>screen |
| 1793 | <b>Kobin C.,Tyson E.</b> . Thematic analysis of hip-hop music: Can hip-hop in therapy facilitate empathic connections when working with clients in urban settings?. <i>Arts in Psychotherapy</i> . 2006//. 33:343                                                                                                                                                    | Level 1, Form<br>Title/abstract<br>screen |
| 1796 | <b>Pomm H.A.</b> . Regaining balance after "reality vertigo:" Teaching learners to attend to the psychological aspects of patients with chronic, nonmalignant pain. <i>Family Medicine</i> . 2006//. 38:86                                                                                                                                                           | Level 1, Form<br>Title/abstract<br>screen |
| 1797 | <b>Meier P.S.,Donmall M.C.</b> . Differences in client and therapist views of the working alliance in drug treatment. <i>Journal of Substance Use</i> . 2006//. 11:73                                                                                                                                                                                                | Level 2, Form<br>Full Text<br>Screening   |
| 1798 | <b>Onate J.</b> . Psychiatric consultation in outpatient primary care settings: Should consultation change to collaboration?. <i>Primary Psychiatry</i> . 2006//. 13:41                                                                                                                                                                                              | Level 1, Form<br>Title/abstract<br>screen |
| 1799 | <b>Stoddard F.J.,Usher C.T.,Abrams A.N.</b> . Psychopharmacology in Pediatric Critical Care. <i>Child and Adolescent Psychiatric Clinics of North America</i> . 2006//. 15:611                                                                                                                                                                                       | Level 1, Form<br>Title/abstract<br>screen |
| 1806 | <b>De Lucas Taracena Ma.T.,Montanes Rada F.</b> . Attachment styles and representations in drug users. <i>Adicciones</i> . 2006//. 18:377                                                                                                                                                                                                                            | Level 1, Form<br>Title/abstract<br>screen |
| 1809 | <b>Jones S.,Burrell-Hodgson G.,Tate G.,Fowler B.</b> . Personality disorder in primary care: Factors associated with therapist views of process and outcome. <i>Behavioural and Cognitive Psychotherapy</i> . 2006//. 34:453                                                                                                                                         | Level 1, Form<br>Title/abstract<br>screen |
| 1810 | <b>Holmes A.,Hodge M.,Lenten S.,Fielding J.,Castle D.,Velakoulis D.,Bradley G.</b> . Chronic mental illness and community treatment resistance. <i>Australasian Psychiatry</i> . 2006//. 14:272                                                                                                                                                                      | Level 1, Form<br>Title/abstract<br>screen |
| 1813 | <b>Brook M.,Hilty D.M.,Liu W.,Hu R.,Frye M.A.</b> . Discharge against medical advice from inpatient psychiatric treatment: A literature review. <i>Psychiatric Services</i> . 2006//. 57:1192                                                                                                                                                                        | Level 1, Form<br>Title/abstract<br>screen |
| 1814 | <b>Gifford E.V.,Ritsher J.B.,McKellar J.D.,Moos R.H.</b> . Acceptance and relationship context: A model of substance use disorder treatment outcome. <i>Addiction</i> . 2006//. 101:1167                                                                                                                                                                             | Level 2, Form<br>Full Text<br>Screening   |
| 1816 | <b>Redfern J.M.,Mckevitt C.,Wolfe C.D.A.</b> . Risk management after stroke: The limits of a patient-centred approach. <i>Health, Risk and Society</i> . 2006//. 8:123                                                                                                                                                                                               | Level 1, Form<br>Title/abstract<br>screen |
| 1820 | <b>Kisely S.,Duerden D.,Shaddick S.,Jayabarathan A.</b> . Collaboration between primary care and psychiatric services: Does it help family physicians?. <i>Canadian Family Physician</i> . 2006//. 52:876                                                                                                                                                            | Level 1, Form<br>Title/abstract<br>screen |
| 1821 | <b>Hu L.-X.,Wu J.-L.,Feng J.,Hou Y.-M.</b> . Ameliorative effect of client-centered therapy in combination with individual and group interventions on the psychological health status in members of drugs rehabilitation through labor. <i>Chinese Journal of Clinical Rehabilitation</i> . 2006//. 10:72                                                            | Level 1, Form<br>Title/abstract<br>screen |
| 1822 | <b>Barber J.P.,Gallop R.,Crits-Christoph P.,Frank A.,Thase M.E.,Weiss R.D.,Connolly Gibbons M.B.</b> . The role of therapist adherence, therapist competence, and alliance in predicting outcome of individual drug counseling: Results from the National Institute Drug Abuse Collaborative Cocaine Treatment Study. <i>Psychotherapy Research</i> . 2006//. 16:229 | Level 2, Form<br>Full Text<br>Screening   |

|      |                                                                                                                                                                                                                                                                                                                                                                     |                                           |
|------|---------------------------------------------------------------------------------------------------------------------------------------------------------------------------------------------------------------------------------------------------------------------------------------------------------------------------------------------------------------------|-------------------------------------------|
| 1826 | <b>Piccoli G.B.,Soragna G.,Rossetti M.,Putaggio S.,Perrotta L.,Bonetto A.,Magnano A.,Vercellone F.</b> Non-compliance after a kidney-pancreas transplantation - A narrative case-analysis involving different patient-physician relationships and ethical frames. <i>Transplantationsmedizin: Organ der Deutschen Transplantationsgesellschaft</i> . 2005//. 17:107 | Level 1, Form<br>Title/abstract<br>screen |
| 1827 | <b>Galluzzi K.E.</b> Editor's message: Patient-centered care for chronic nonmalignant pain. <i>Journal of the American Osteopathic Association</i> . 2005//. 105:#pages#                                                                                                                                                                                            | Level 1, Form<br>Title/abstract<br>screen |
| 1828 | <b>Roy-Byrne P.,Stein M.B.,Russo J.,Craske M.,Katon W.,Sullivan G.,Sherbourne C.</b> Medical illness and response to treatment in primary care panic disorder. <i>General Hospital Psychiatry</i> . 2005//. 27:237                                                                                                                                                  | Level 1, Form<br>Title/abstract<br>screen |
| 1830 | <b>Rumpold G.,Doering S.,Smrekar U.,Schubert C.,Koza R.,Schatz D.S.,Bertl-Schuessler A.,Janecke N.,Lampe A.,Schuessler G.</b> Changes in motivation and the therapeutic alliance during a pretherapy diagnostic and motivation-enhancing phase among psychotherapy outpatients. <i>Psychotherapy Research</i> . 2005//. 15:117                                      | Level 1, Form<br>Title/abstract<br>screen |
| 1831 | <b>Faw L.,Hogue A.,Johnson S.,Diamond G.M.,Liddle H.A.</b> The Adolescent Therapeutic Alliance Scale (ATAS): Initial psychometrics and prediction of outcome in family-based substance abuse prevention counseling. <i>Psychotherapy Research</i> . 2005//. 15:141                                                                                                  | Level 1, Form<br>Title/abstract<br>screen |
| 1836 | <b>Nielsen A.S.</b> Factors influencing the therapeutic alliance and treatment compliance: The individual experience. <i>NAD Publication</i> . 2005//. #volume#:187                                                                                                                                                                                                 | Level 1, Form<br>Title/abstract<br>screen |
| 1837 | <b>Park E.R.,Wolfe T.J.,Gokhale M.,Winickoff J.P.,Rigotti N.A.</b> Perceived preparedness to provide preventive counseling reports of graduating primary care residents at academic health centers. <i>Journal of General Internal Medicine</i> . 2005//. 20:386                                                                                                    | Level 1, Form<br>Title/abstract<br>screen |
| 1840 | <b>Jensen P.S.,Weersing R.,Hoagwood K.E.,Goldman E.</b> What is the evidence for evidence-based treatments? A hard look at our soft underbelly. <i>Mental Health Services Research</i> . 2005//. 7:53                                                                                                                                                               | Level 1, Form<br>Title/abstract<br>screen |
| 1841 | <b>Leichsenring F.</b> Are psychodynamic and psychoanalytic therapies effective? A review of empirical data. <i>International Journal of Psychoanalysis</i> . 2005//. 86:841                                                                                                                                                                                        | Level 1, Form<br>Title/abstract<br>screen |
| 1842 | <b>Blaise M.</b> From hand to hand: Reflections on the prescription and dispensing of medication at the moment of consultation as a tool against drug addiction. <i>Information Psychiatrique</i> . 2005//. 81:429                                                                                                                                                  | Level 1, Form<br>Title/abstract<br>screen |
| 1848 | <b>Powers T.A.,Alonso A.</b> Dynamic psychotherapy and the problem of time. <i>Journal of Contemporary Psychotherapy</i> . 2004//. 34:125                                                                                                                                                                                                                           | Level 1, Form<br>Title/abstract<br>screen |
| 1849 | <b>Goforth H.W.,Lupash D.P.,Brown M.E.,Tan J.,Fernandez F.</b> Role of alcohol and substances of abuse in the immunomodulation of human immunodeficiency virus disease: A review. <i>Addictive Disorders and their Treatment</i> . 2004//. 3:174                                                                                                                    | Level 1, Form<br>Title/abstract<br>screen |
| 1855 | <b>Moretti F.,Goss C.,Del Piccolo L.</b> Communication strategies to motivate patients to follow doctor's advice. <i>Recenti Progressi in Medicina</i> . 2004//. 95:61                                                                                                                                                                                              | Level 1, Form<br>Title/abstract<br>screen |
| 1863 | <b>Galloway V.A.,Brodsky S.L.</b> Caring less, doing more: The role of therapeutic detachment with volatile and unmotivated clients. <i>American Journal of Psychotherapy</i> . 2003//. 57:32                                                                                                                                                                       | Level 1, Form<br>Title/abstract<br>screen |

|      |                                                                                                                                                                                                                                                                                                                                     |                                           |
|------|-------------------------------------------------------------------------------------------------------------------------------------------------------------------------------------------------------------------------------------------------------------------------------------------------------------------------------------|-------------------------------------------|
| 1864 | <b>Demmel R.,Rist F.,Hagen J.,Aulhorn I.,Scheuren B.,Scherbaum N.,Gesenhues S.,Rollnick S.</b> Secondary prevention beyond screening and brief advice. <i>Suchtmedizin in Forschung und Praxis</i> . 2003//. 5:33                                                                                                                   | Level 1, Form<br>Title/abstract<br>screen |
| 1866 | <b>Oetzel K.B.,Scherer D.G.</b> Therapeutic engagement with adolescents in psychotherapy. <i>Psychotherapy</i> . 2003//. 40:215                                                                                                                                                                                                     | Level 1, Form<br>Title/abstract<br>screen |
| 1867 | <b>Jessup M.A.,Humphreys J.C.,Brindis C.D.,Lee K.A.</b> Extrinsic barriers to substance abuse treatment among pregnant drug dependent women. <i>Journal of Drug Issues</i> . 2003//. 33:285                                                                                                                                         | Level 1, Form<br>Title/abstract<br>screen |
| 1868 | <b>Mills P.D.,Harvey P.W.</b> Beyond community-based diabetes management and the COAG coordinated care trial. <i>Australian Journal of Rural Health</i> . 2003//. 11:131                                                                                                                                                            | Level 1, Form<br>Title/abstract<br>screen |
| 1870 | <b>Fenton W.S.</b> Shared decision making: A model for the physician-patient relationship in the 21st century?. <i>Acta Psychiatrica Scandinavica</i> . 2003//. 107:401                                                                                                                                                             | Level 1, Form<br>Title/abstract<br>screen |
| 1874 | <b>Barber J.P.,Liese B.S.,Abrams M.J.</b> Development of the cognitive therapy adherence and competence scale. <i>Psychotherapy Research</i> . 2003//. 13:205                                                                                                                                                                       | Level 1, Form<br>Title/abstract<br>screen |
| 1884 | <b>Walters G.D.</b> Lessons learned from project MATCH. <i>Addictive Disorders and their Treatment</i> . 2002//. 1:135                                                                                                                                                                                                              | Level 1, Form<br>Title/abstract<br>screen |
| 1885 | <b>Milbrodt T.</b> Breaking the cycle of alcohol problems among native Americans: Culturally-sensitive treatment in the Lakota community. <i>Alcoholism Treatment Quarterly</i> . 2002//. 20:19                                                                                                                                     | Level 2, Form<br>Full Text<br>Screening   |
| 1888 | <b>Mallow A.J.</b> To sink or swim: The use of dream material in addiction treatment. <i>Journal of Substance Use</i> . 2002//. 7:157                                                                                                                                                                                               | Level 1, Form<br>Title/abstract<br>screen |
| 1889 | <b>Santiago N.J.,Klein D.N.,Vivian D.,Vocisano C.,Dowling F.,Arnow B.A.,Manber R.,Markowitz J.C.,McCullough Jr. J.P.,Riso L.P.L.,Rothbaum B.O.,Rush A.J.,Thase M.E.,Keller M.B.</b> Pretreatment correlates of the therapeutic alliance in the chronically depressed. <i>Journal of Contemporary Psychotherapy</i> . 2002//. 32:281 | Level 1, Form<br>Title/abstract<br>screen |
| 1893 | <b>Teusch L.,Bohme H.,Finke J.,Gastpar M.</b> Effects of client-centered psychotherapy for personality disorders alone and in combination with psychopharmacological treatment: An empirical follow-up study. <i>Psychotherapy and Psychosomatics</i> . 2001//. 70:328                                                              | Level 1, Form<br>Title/abstract<br>screen |
| 1894 | <b>Cecero J.J.,Fenton L.R.,Nich C.,Frankforter T.L.,Carroll K.M.</b> Focus on therapeutic alliance: The psychometric properties of six measures across three treatments. <i>Psychotherapy</i> . 2001//. 38:1                                                                                                                        | Level 1, Form<br>Title/abstract<br>screen |
| 1898 | <b>Waldstein S.R.,Neumann S.A.,Drossman D.A.,Novack D.H.</b> Teaching psychosomatic (biopsychosocial) medicine in United States medical schools: Survey findings. <i>Psychosomatic Medicine</i> . 2001//. 63:335                                                                                                                    | Level 1, Form<br>Title/abstract<br>screen |
| 1902 | <b>Martin D.J.,Garske J.P.,Katherine Davis M.</b> Relation of the therapeutic alliance with outcome and other variables: A meta-analytic review. <i>Journal of Consulting and Clinical Psychology</i> . 2000//. 68:438                                                                                                              | Level 1, Form<br>Title/abstract<br>screen |
| 1911 | <b>Rihmer Z.,Pestality P.</b> Bipolar II disorder and suicidal behavior. <i>Psychiatric Clinics of North America</i> . 1999//. 22:667                                                                                                                                                                                               | Level 1, Form<br>Title/abstract<br>screen |



|      |                                                                                                                                                                                                                                                                  |                                           |
|------|------------------------------------------------------------------------------------------------------------------------------------------------------------------------------------------------------------------------------------------------------------------|-------------------------------------------|
| 1915 | <b>Guinjoan S.M.,Ross D.R.</b> . The use of metaphors by the 'Ambulatory inpatients' of the managed care era. <i>American Journal of Psychotherapy</i> . 1999//. 53:188                                                                                          | Level 1, Form<br>Title/abstract<br>screen |
| 1916 | <b>Schwartz B.</b> . Preventing the spread of antimicrobial resistance among bacterial respiratory pathogens in industrialized countries: The case for judicious antimicrobial use. <i>Clinical Infectious Diseases</i> . 1999//. 28:211                         | Level 1, Form<br>Title/abstract<br>screen |
| 1918 | <b>Gordon J.R.</b> . Harm reduction psychotherapy comes out of the closet. <i>In Session - Psychotherapy in Practice</i> . 1998//. 4:69                                                                                                                          | Level 1, Form<br>Title/abstract<br>screen |
| 1931 | <b>Cadilhac P.,Schmitt L.,Sztulman H.,Moron P.,Reinert M.</b> . Assessment of the interpersonal psychotherapy's effect during opioid detoxification: Statistical analysis of the textual data. <i>Annales Medico-Psychologiques</i> . 1996//. 154:382            | Level 1, Form<br>Title/abstract<br>screen |
| 1933 | <b>Varma S.C.,Siris S.G.</b> . Alcohol abuse in Asian Americans. Epidemiological and treatment issues. <i>American Journal on Addictions</i> . 1996//. 5:136                                                                                                     | Level 1, Form<br>Title/abstract<br>screen |
| 1935 | <b>Bremner A.J.</b> . The therapeutic alliance in severe mental disorder. <i>Therapeutic Communities: the International Journal for Therapeutic and Supportive Organizations</i> . 1995//. 16:193                                                                | Level 1, Form<br>Title/abstract<br>screen |
| 1937 | <b>Najavits L.M.,Luborsky L.,Frank A.,Weiss R.D.,Liese B.S.,Thompson H.,Nakayama E.,Siqueland L.,Daley D.,Onken L.S.</b> . Therapists' emotional reactions to substance abusers: A new questionnaire and initial findings. <i>Psychotherapy</i> . 1995//. 32:669 | Level 1, Form<br>Title/abstract<br>screen |
| 1940 | <b>Kalir H.H.</b> . Psychiatric primary care. <i>Clinical Consultations in Obstetrics and Gynecology</i> . 1995//. 7:27                                                                                                                                          | Level 1, Form<br>Title/abstract<br>screen |
| 1941 | <b>MacKinney T.G.,Walters D.,Bird G.L.,Nattinger A.B.</b> . Improvements in preventive care and communication for deaf patients: Results of a novel primary health care program. <i>Journal of General Internal Medicine</i> . 1995//. 10:133                    | Level 1, Form<br>Title/abstract<br>screen |
| 1948 | <b>Goldblatt M.J.</b> . Hospitalization of the suicidal patient. <i>Death Studies</i> . 1994//. 18:453                                                                                                                                                           | Level 1, Form<br>Title/abstract<br>screen |
| 1949 | <b>Aapro N.,Dazord A.,Gerin P.,De Coulon N.,Scariati G.,Lastrico A.,Andreoli A.</b> . Follow-up of patients receiving psychotherapy at an institution in Geneva. <i>Psychotherapies</i> . 1994//. 14:183                                                         | Level 1, Form<br>Title/abstract<br>screen |
| 1953 | <b>Rockland L.H.</b> . A review of supportive psychotherapy, 1986-1992. <i>Hospital and Community Psychiatry</i> . 1993//. 44:1053                                                                                                                               | Level 1, Form<br>Title/abstract<br>screen |
| 1956 | <b>Southwick S.M.,Satel S.L.</b> . Exploring the meanings of substance abuse: An important dimension of early work with borderline patients. <i>American Journal of Psychotherapy</i> . 1990//. 44:61                                                            | Level 1, Form<br>Title/abstract<br>screen |
| 1957 | <b>German P.S.,Burton L.C.</b> . Clinicians, the elderly and drugs. <i>Journal of Drug Issues</i> . 1989//. 19:221                                                                                                                                               | Level 1, Form<br>Title/abstract<br>screen |
| 1958 | <b>Hambrecht M.</b> . Relapse in psychotherapy. <i>PPmP Psychotherapie Psychosomatik Medizinische Psychologie</i> . 1988//. 38:425                                                                                                                               | Level 1, Form<br>Title/abstract<br>screen |
| 1959 | <b>Levine D.M.</b> . The physician's role in health-promotion and disease prevention. <i>Bulletin of the New York Academy of Medicine: Journal of Urban Health</i> .                                                                                             | Level 1, Form<br>Title/abstract           |

|      |                                                                                                                                                                                                                                                                                                                                                                                                  |                                     |
|------|--------------------------------------------------------------------------------------------------------------------------------------------------------------------------------------------------------------------------------------------------------------------------------------------------------------------------------------------------------------------------------------------------|-------------------------------------|
|      | 1987//. 63:950                                                                                                                                                                                                                                                                                                                                                                                   | screen                              |
| 1961 | <b>Feselmayer S.,Heinzl K.</b> . Client-centered psychotherapy with addicts. <i>Wiener Zeitschrift für Suchtforschung</i> . 1985//. 8:39                                                                                                                                                                                                                                                         | Level 2, Form Full Text Screening   |
| 1963 | <b>Windsor R.A.,Green L.W.,Roseman J.M.</b> . Health promotion and maintenance for patients with chronic obstructive pulmonary disease: A review. <i>Journal of Chronic Diseases</i> . 1980//. 33:5                                                                                                                                                                                              | Level 1, Form Title/abstract screen |
| 1966 | <b>Mansell Pattison E.</b> . The Jack Donovan memorial lecture-1978: Differential approaches to multiple problems associated with alcoholism. <i>Contemporary Drug Problems</i> . 1978//. 7:265                                                                                                                                                                                                  | Level 1, Form Title/abstract screen |
| 1968 | <b>Flynn W.R.</b> . Drug abuse as a defense in adolescence: a follow up. <i>Adolescence</i> . 1973//. 8:363                                                                                                                                                                                                                                                                                      | Level 1, Form Title/abstract screen |
| 1972 | <b>Deirdre O'Sullivan, Justin Watts, Chad Shenk.</b> Child maltreatment severity, chronic substance abuse, and disability status.. <i>Rehabilitation Psychology</i> . 2018/05//. 63:313                                                                                                                                                                                                          | Level 1, Form Title/abstract screen |
| 1974 | <b>Björn Philips, Roger Karlsson, Rebecca Nygren, Amelie Rother-Schirren, Andrzej Werbart.</b> Early therapeutic process related to dropout in mentalization-based treatment with dual diagnosis patients.. <i>Psychoanalytic Psychology</i> . 2018/04//. 35:205                                                                                                                                 | Level 2, Form Full Text Screening   |
| 1975 | <b>Jocelyn C. Anderson, Jacquelyn C. Campbell, Nancy E. Glass, Michele R. Decker, Nancy Perrin, Jason Farley.</b> Impact of intimate partner violence on clinic attendance, viral suppression and CD4 cell count of women living with HIV in an urban clinic setting.. <i>AIDS Care</i> . 2018/04//. 30:399                                                                                      | Level 1, Form Title/abstract screen |
| 1977 | <b>Jennifer J. Esala, Maria M. Vukovich, Ashley Hanbury, Shraddha Kashyap, Amy Joscelyne.</b> Collaborative care for refugees and torture survivors: Key findings from the literature.. <i>Traumatology</i> . 2018/03/08/. #volume#:#pages#                                                                                                                                                      | Level 1, Form Title/abstract screen |
| 1978 | <b>P. Kushalnagar, A. Engleman, G. Sadler.</b> Deaf patient-provider communication and lung cancer screening: Health information national trends survey in american sign language (hints-asl).. <i>Patient Education and Counseling</i> . 2018/03/05/. #volume#:#pages#                                                                                                                          | Level 1, Form Title/abstract screen |
| 1979 | <b>Annett Lotzin, Sven Buth, Susanne Sehner, Philipp Hiller, Marcus-Sebastian Martens, Silke Pawils, Franka Metzner, John Read, Martin Härter, Ingo Schäfer.</b> 'Learning how to ask': Effectiveness of a training for trauma inquiry and response in substance use disorder healthcare professionals.. <i>Psychological Trauma: Theory, Research, Practice, and Policy</i> . 2018/03//. 10:229 | Level 1, Form Title/abstract screen |
| 1982 | <b>Catherine DeCarlo Santiago, Tali Raviv, Lisa H. Jaycox.</b> Universal and schoolwide interventions for trauma.. <i>Creating healing school communities: School-based interventions for students exposed to trauma..</i> 2018//. #volume#:#37                                                                                                                                                  | Level 1, Form Title/abstract screen |
| 1983 | <b>Randi Sokol, Chiara Albanese, Deviney Chaponis, Jessica Early, George Maxted, Diana Morrill, Grace Poirier, Fran Puopolo, Zev Schuman-Olivier.</b> Why use group visits for opioid use disorder treatment in primary care? A patient-centered qualitative study.. <i>Substance Abuse</i> . 2018/01//. 39:52                                                                                   | Level 1, Form Title/abstract screen |
| 1984 | <b>Charles Geier, Nicole Roberts, David Lydon-Staley.</b> The effects of smoking abstinence on incentivized spatial working memory.. <i>Substance Use &amp; Misuse</i> . 2018/01//. 53:86                                                                                                                                                                                                        | Level 1, Form Title/abstract screen |

|      |                                                                                                                                                                                                                                                                                                                                                                                         |                                     |
|------|-----------------------------------------------------------------------------------------------------------------------------------------------------------------------------------------------------------------------------------------------------------------------------------------------------------------------------------------------------------------------------------------|-------------------------------------|
| 1985 | <b>April Joy Damian, Joseph J. Gallo, Tamar Mendelson.</b> Barriers and facilitators for access to mental health services by traumatized youth.. <i>Children and Youth Services Review</i> . 2018/01//. 85:273                                                                                                                                                                          | Level 1, Form Title/abstract screen |
| 1987 | <b>Lortiz I. Babilonia.</b> Integrating person-centered therapy with rational emotive behavioral therapy to treatment alcohol use disorder in Hispanic armed forces members.. <i>Dissertation Abstracts International: Section B: The Sciences and Engineering</i> . 2018//. 78:#pages#                                                                                                 | Level 2, Form Full Text Screening   |
| 1988 | <b>Jessica Ann Brown.</b> A relational investigation of the therapeutic alliance in substance abuse treatment: A qualitative inquiry.. <i>Dissertation Abstracts International: Section B: The Sciences and Engineering</i> . 2018//. 78:#pages#                                                                                                                                        | Level 2, Form Full Text Screening   |
| 1989 | <b>Jennifer J. Buckley.</b> Exploring the role of trauma in women's substance use disorder treatment: A naturalistic study.. <i>Dissertation Abstracts International: Section B: The Sciences and Engineering</i> . 2018//. 78:#pages#                                                                                                                                                  | Level 2, Form Full Text Screening   |
| 1990 | <b>Laura Eidlitz.</b> Therapeutic alliance and age of trauma onset in treatment of Comorbid Posttraumatic Stress Disorder and Alcohol Use Disorder.. <i>Dissertation Abstracts International: Section B: The Sciences and Engineering</i> . 2018//. 79:#pages#                                                                                                                          | Level 2, Form Full Text Screening   |
| 1991 | <b>Faith May Golden.</b> Lived experiences and coping styles of Alaskan women with opioid use disorders.. <i>Dissertation Abstracts International: Section B: The Sciences and Engineering</i> . 2018//. 78:#pages#                                                                                                                                                                     | Level 1, Form Title/abstract screen |
| 1992 | <b>Maya Hodgdon.</b> Impact of voices curriculum on adolescent mothers.. <i>Dissertation Abstracts International: Section B: The Sciences and Engineering</i> . 2018//. 78:#pages#                                                                                                                                                                                                      | Level 1, Form Title/abstract screen |
| 1993 | <b>Alexandra H. Kutnick.</b> Understanding adaptation to an HIV diagnosis in the context of urban poverty: A qualitative examination.. <i>Dissertation Abstracts International: Section B: The Sciences and Engineering</i> . 2018//. 78:#pages#                                                                                                                                        | Level 1, Form Title/abstract screen |
| 1994 | <b>Mebane E. Powell.</b> Impact of psychological maltreatment during childhood by one's maternal figure on the mental and physical health of older adult men.. <i>Dissertation Abstracts International Section A: Humanities and Social Sciences</i> . 2018//. 79:#pages#                                                                                                               | Level 1, Form Title/abstract screen |
| 1996 | <b>Alberta S. J. van der Watt, Gareth Nortje, Lola Kola, John Appiah-Poku, Caleb Othieno, Benjamin Harris, Bibilola D. Oladeji, Oluyomi Esan, Victor Makanjuola, LeShawndra N. Price, Soraya Seedat, Oye Gureje.</b> Collaboration between biomedical and complementary and alternative care providers: Barriers and pathways.. <i>Qualitative Health Research</i> . 2017/12//. 27:2177 | Level 1, Form Title/abstract screen |
| 1997 | <b>Yvonne C. M. Rensen, Jos I. M. Egger, Josette Westhoff, Serge J. W. Walvoort, Roy P. C. Kessels.</b> The effect of errorless learning on quality of life in patients with Korsakoff's syndrome.. <i>Neuropsychiatric Disease and Treatment</i> . 2017/11/27/. 13:#pages#                                                                                                             | Level 1, Form Title/abstract screen |
| 2003 | <b>Emily Gardiner, Grace Iarocci, Marlene Moretti.</b> Integrative care for adolescents with dual diagnosis: Considering trauma and attachment within an innovative model for clinical practice.. <i>Journal of Mental Health Research in Intellectual Disabilities</i> . 2017/10//. 10:321                                                                                             | Level 1, Form Title/abstract screen |
| 2005 | <b>Pablo Barrio, Lluisa Ortega, Hugo López, Antoni Gual.</b> Self-management and shared decision-making in alcohol dependence via a mobile app: A pilot study.. <i>International Journal of Behavioral Medicine</i> . 2017/10//. 24:722                                                                                                                                                 | Level 2, Form Full Text Screening   |
| 2007 | <b>Lesia M. Ruglass, Alina Shevorykin, Christina Brezing, Mei-Chen Hu, Denise A. Hien.</b> Demographic and clinical characteristics of treatment seeking                                                                                                                                                                                                                                | Level 1, Form Title/abstract        |

|      |                                                                                                                                                                                                                                                                                                                                                                                                                                                          |                                     |
|------|----------------------------------------------------------------------------------------------------------------------------------------------------------------------------------------------------------------------------------------------------------------------------------------------------------------------------------------------------------------------------------------------------------------------------------------------------------|-------------------------------------|
|      | women with full and subthreshold PTSD and concurrent cannabis and cocaine use disorders.. <i>Journal of Substance Abuse Treatment</i> . 2017/09//. 80:45                                                                                                                                                                                                                                                                                                 | screen                              |
| 2008 | <b>Bethany M. Kwan, Sanjay Chadha, Mika K. Hamer, David Spagnolo, Sheila Kee.</b> Mixed methods evaluation of a collaborative care implementation using RE-AIM.. <i>Families, Systems, &amp; Health</i> . 2017/09//. 35:295                                                                                                                                                                                                                              | Level 1, Form Title/abstract screen |
| 2009 | <b>Andy Guise, Maureen Seguin, Gitau Mburu, Susie McLean, Pippa Grenfell, Zahed Islam, Sergii Filippovych, Happy Assan, Andrea Low, Peter Vickerman, Tim Rhodes.</b> Integrated opioid substitution therapy and HIV care: A qualitative systematic review and synthesis of client and provider experiences.. <i>AIDS Care</i> . 2017/09//. 29:1119                                                                                                       | Level 2, Form Full Text Screening   |
| 2010 | <b>Eileen Klein.</b> Using social support for LGBTQ clients with mental illness to be out of the closet, in treatment, and in the community.. <i>Journal of Gay &amp; Lesbian Social Services: The Quarterly Journal of Community &amp; Clinical Practice</i> . 2017/07//. 29:221                                                                                                                                                                        | Level 1, Form Title/abstract screen |
| 2012 | <b>Eugenia Oviedo-Joekes, Kirsten Marchand, Heather Palis, Daphne Guh, Suzanne Brissette, Kurt Lock, Scott MacDonald, Scott Harrison, Aslam H. Anis, Michael Krausz, David C. Marsh, Martin T. Schechter.</b> Predictors of treatment allocation guesses in a randomized controlled trial testing double-blind injectable hydromorphone and diacetylmorphine for severe opioid use disorder.. <i>Addiction Research &amp; Theory</i> . 2017/07//. 25:263 | Level 1, Form Title/abstract screen |
| 2013 | <b>James F. Boswell, Nicole M. Cain, Jennifer M. Oswald, Andrew A. McAleavey, Robert Adelman.</b> Interpersonal pathoplasticity and trajectories of change in routine adolescent and young adult residential substance abuse treatment.. <i>Journal of Consulting and Clinical Psychology</i> . 2017/07//. 85:676                                                                                                                                        | Level 1, Form Title/abstract screen |
| 2015 | <b>Laurel A. Mattos, Adam T. Schmidt, Craig E. Henderson, Aaron Hogue.</b> Therapeutic alliance and treatment outcome in the outpatient treatment of urban adolescents: The role of callous–unemotional traits.. <i>Psychotherapy</i> . 2017/06//. 54:136                                                                                                                                                                                                | Level 1, Form Title/abstract screen |
| 2016 | <b>Elena Argento, Steffanie A. Strathdee, Shira Goldenberg, Melissa Braschel, Julio Montaner, Kate Shannon.</b> Violence, trauma and living with HIV: Longitudinal predictors of initiating crystal methamphetamine injection among sex workers.. <i>Drug and Alcohol Dependence</i> . 2017/06/01/. 175:198                                                                                                                                              | Level 1, Form Title/abstract screen |
| 2018 | <b>Laurence Rigaud, Sabine de Bazelaire, Lucia Romo.</b> Utilisation d’outils numériques en vue du traitement de l’addiction au cannabis d’un public francophone: Synthèse de la recherche. = Use of electronic tools to treat cannabis addiction in a francophone population: A research overview.. <i>Alcoologie et Addictologie</i> . 2017/06//. 39:41S                                                                                               | Level 1, Form Title/abstract screen |
| 2021 | <b>Aymeric Reyre, Raphaël Jeannin, Myriam Largueche, Marie Rose Moro, Thierry Baubet, Olivier Taieb.</b> Overcoming professionals’ challenging experiences to promote a trustful therapeutic alliance in addiction treatment: A qualitative study.. <i>Drug and Alcohol Dependence</i> . 2017/05/01/. 174:30                                                                                                                                             | Level 2, Form Full Text Screening   |
| 2022 | <b>Audrey L. Jones, Leslie R. M. Hausmann, Gretchen L. Haas, Maria K. Mor, John P. Cashy, James H. Jr. Schaefer, Adam J. Gordon.</b> A national evaluation of homeless and nonhomeless veterans’ experiences with primary care.. <i>Psychological Services</i> . 2017/05//. 14:174                                                                                                                                                                       | Level 1, Form Title/abstract screen |
| 2023 | <b>Marco Antonio Nocito Echevarria, Tassio Andrade Reis, Giuliano Ruffo Capatti, Victor Siciliano Soares, Dartiu Xavier da Silveira, Thiago Marques Fidalgo.</b> N-acetylcysteine for treating cocaine addiction—A systematic review.. <i>Psychiatry Research</i> . 2017/05//. 251:197                                                                                                                                                                   | Level 1, Form Title/abstract screen |
| 2024 | <b>Cathryn Glanton Holzhauer, Stephanie A. Gamble.</b> Depressive symptoms                                                                                                                                                                                                                                                                                                                                                                               | Level 1, Form                       |

|      |                                                                                                                                                                                                                                                                                                                                                    |                                     |
|------|----------------------------------------------------------------------------------------------------------------------------------------------------------------------------------------------------------------------------------------------------------------------------------------------------------------------------------------------------|-------------------------------------|
|      | mediate the relationship between changes in emotion regulation during treatment and abstinence among women with alcohol use disorders.. <i>Psychology of Addictive Behaviors</i> . 2017/05//. 31:284                                                                                                                                               | Title/abstract screen               |
| 2027 | <b>Suzanne Carlberg-Racich, Lindsey Roden.</b> Barriers to patient-centered human immunodeficiency virus (HIV) care with African American patients who use drugs: Social construction of the typical and ideal care visit.. <i>Substance Abuse</i> . 2017/04//. 38:205                                                                             | Level 1, Form Title/abstract screen |
| 2030 | <b>Vincent Chin-Hung Chen, Hua Ting, Meng-Huan Wu, Tsang-Yaw Lin, Michael Gossop.</b> Sleep disturbance and its associations with severity of dependence, depression and quality of life among heroin-dependent patients: A cross-sectional descriptive study.. <i>Substance Abuse Treatment, Prevention, and Policy</i> . 2017/03/20/. 12:#pages# | Level 1, Form Title/abstract screen |
| 2032 | <b>Kristen Clements-Nolle, Sandra Larson, Aliya Buttar, Lindsey Dermid-Gray.</b> Childhood maltreatment and unprotected sex among female juvenile offenders: Evidence of mediation by substance abuse and psychological distress.. <i>Women's Health Issues</i> . 2017/03//Mar-Apr, 2017. 27:188                                                   | Level 1, Form Title/abstract screen |
| 2037 | <b>Carrisa S. Hoelscher, Michael W. Kramer, Christopher Nguyen, Olivia D. Cooper, Eric Anthony Day.</b> Decision making and communication in a statewide interagency task force: An investigation of planned versus utilized processes.. <i>Management Communication Quarterly</i> . 2017/02//. 31:39                                              | Level 1, Form Title/abstract screen |
| 2038 | <b>Nhat Huynh, Natalie Arabian, Anna Naito, Stan Louie, Michael W. Jakowec, Liana Asatryan, Daryl L. Davies.</b> Preclinical development of moxidectin as a novel therapeutic for alcohol use disorder.. <i>Neuropharmacology</i> . 2017/02//. 113:60                                                                                              | Level 1, Form Title/abstract screen |
| 2039 | <b>Elias M. Klemperer, John R. Hughes, Peter W. Callas, Laura J. Solomon.</b> Working alliance and empathy as mediators of brief telephone counseling for cigarette smokers who are not ready to quit.. <i>Psychology of Addictive Behaviors</i> . 2017/02//. 31:130                                                                               | Level 1, Form Title/abstract screen |
| 2040 | <b>Jennifer Pecina, Frederick North, Mark D. Williams, Kurt B. Angstman.</b> Use of an on-line patient portal in a depression collaborative care management program.. <i>Journal of Affective Disorders</i> . 2017/01/15/. 208:1                                                                                                                   | Level 1, Form Title/abstract screen |
| 2041 | <b>Lisa K. Kearney, Laura O. Wray, Katherine M. Dollar, Andrew S. Pomerantz.</b> Psychological assessment in the Veterans Health Administration (VHA) model of integrated primary care.. <i>Handbook of psychological assessment in primary care settings</i> .. 2017///. #volume#:709                                                             | Level 1, Form Title/abstract screen |
| 2042 | <b>Adam Silberstein, Lindsey Boone.</b> Multiple relationships in recovery communities.. <i>Multiple relationships in psychotherapy and counseling: Unavoidable, common, and mandatory dual relations in therapy</i> .. 2017///. #volume#:130                                                                                                      | Level 1, Form Title/abstract screen |
| 2043 | <b>Elyse R. Park, Christina M. Luberto, Conall O'Cleirigh, Giselle K. Perez, Julianne G. Wilner.</b> Smoking cessation.. <i>The Massachusetts General Hospital handbook of behavioral medicine: A clinician's guide to evidence-based psychosocial interventions for individuals with medical illness</i> .. 2017///. #volume#:9                   | Level 1, Form Title/abstract screen |
| 2044 | <b>Mrigaya Sinha.</b> Shame and psychotherapy: Theory, method and practice.. <i>The value of shame: Exploring a health resource in cultural contexts</i> .. 2017///. #volume#:251                                                                                                                                                                  | Level 1, Form Title/abstract screen |
| 2049 | <b>Jacquelyn H. Flaskerud.</b> Collaboration needed: Pain care and opioid abuse.. <i>Issues in Mental Health Nursing</i> . 2017/01//. 38:92                                                                                                                                                                                                        | Level 1, Form Title/abstract screen |

|      |                                                                                                                                                                                                                                                                                                                                                                                                                   |                                     |
|------|-------------------------------------------------------------------------------------------------------------------------------------------------------------------------------------------------------------------------------------------------------------------------------------------------------------------------------------------------------------------------------------------------------------------|-------------------------------------|
| 2051 | <b>J. Valdes-Stauber.</b> Suizidales Verhalten aus anthropologischer Sicht: Dialektik zwischen dem medizinischen und dem philosophischen Paradigma. = Suicide, suicidal behaviour, anthropology, holistic view of human being, practical science, therapeutic relationship.. <i>Nervenheilkunde: Zeitschrift für interdisziplinäre Fortbildung.</i> 2017///. 36:251                                               | Level 1, Form Title/abstract screen |
| 2052 | <b>Teresa Lyn Fresquez.</b> Effect of therapeutic alliance of clients on methadone maintenance treatment outcomes.. <i>Dissertation Abstracts International: Section B: The Sciences and Engineering.</i> 2017///. 78:#pages#                                                                                                                                                                                     | Level 2, Form Full Text Screening   |
| 2053 | <b>Timofey S. Galuza.</b> Using big data in psychotherapy research: Possibilities and perils.. <i>Dissertation Abstracts International: Section B: The Sciences and Engineering.</i> 2017///. 78:#pages#                                                                                                                                                                                                          | Level 1, Form Title/abstract screen |
| 2054 | <b>Melissa K. Rosenow.</b> Substance abuse and trauma in Latino adolescents: A workbook.. <i>Dissertation Abstracts International: Section B: The Sciences and Engineering.</i> 2017///. 77:#pages#                                                                                                                                                                                                               | Level 2, Form Full Text Screening   |
| 2055 | <b>Vikram Patel, Shuiyuan Xiao, Hanhui Chen, Fahmy Hanna, A. T. Jotheeswaran, Dan Luo, Rachana Parikh, Eesha Sharma, Shamaila Usmani, Yu Yu, Benjamin G. Druss, Shekhar Saxena.</b> The magnitude of and health system responses to the mental health treatment gap in adults in India and China.. <i>The Lancet.</i> 2016/12/17/. 388:3074                                                                       | Level 1, Form Title/abstract screen |
| 2056 | <b>Sarah K. Hill, Peggy Cantrell, Joellen Edwards, Will Dalton.</b> Factors influencing mental health screening and treatment among women in a rural south central Appalachian primary care clinic.. <i>The Journal of Rural Health.</i> 2016//Win 2016. 32:82                                                                                                                                                    | Level 1, Form Title/abstract screen |
| 2062 | <b>Cynthia Shellhaas, Elizabeth Conrey, Dushka Crane, Allison Lorenz, Andrew Wapner, Reena Oza-Frank, Jo Bouchard.</b> The Ohio gestational diabetes postpartum care learning collaborative: Development of a quality improvement initiative to improve systems of care for women.. <i>Maternal and Child Health Journal.</i> 2016/11//. 20:71                                                                    | Level 1, Form Title/abstract screen |
| 2066 | <b>Jeanette Waxmonsky, Lilia Verchinina, Hyungjin Myra Kim, Zongshan Lai, Daniel Eisenberg, Julia T. Kyle, Kristina M. Nord, Jenny H. Rementer, David E. Goodrich, Mark S. Bauer, Marshall R. Thomas, Amy M. Kilbourne.</b> Correlates of emergency department use by individuals with bipolar disorder enrolled in a collaborative care implementation study.. <i>Psychiatric Services.</i> 2016/11/01/. 67:1265 | Level 1, Form Title/abstract screen |
| 2068 | <b>William R. Morrone.</b> President's message: Food and Drug Administration approved naloxone and continued use of improvised nasal naloxone: What is a treatment advocate and educator to do?. <i>Journal of Addictive Diseases.</i> 2016/10//. 35:339                                                                                                                                                          | Level 1, Form Title/abstract screen |
| 2069 | <b>Laura Pavia, Maria Di Blasi, Antonia Cinquegrana, Ernesto Scioti, Tiziana Bussola, Annaluisa Pasinelli, Paola Cavani.</b> The influence of retention, turnover, and alliance on process and outcomes in rolling group psychotherapy for cocaine disorder.. <i>International Journal of Group Psychotherapy.</i> 2016/10//. 66:526                                                                              | Level 1, Form Title/abstract screen |
| 2072 | <b>Robert Sky Allen, Bradley D. Olson.</b> Predicting attrition in the treatment of substance use disorders.. <i>International Journal of Mental Health and Addiction.</i> 2016/10//. 14:728                                                                                                                                                                                                                      | Level 1, Form Title/abstract screen |
| 2075 | <b>Nuria Mallorquí-Bagué, Ana B. Fagundo, Susana Jimenez-Murcia, Rafael de la Torre, Rosa M. Baños, Cristina Botella, Felipe F. Casanueva, Ana B. Crujeiras, Jose C. Fernández-García, Jose M. Fernández-Real, Gema Frühbeck, Roser Granero, Amaia Rodríguez, Iris Tolosa-Sola, Francisco J.</b>                                                                                                                  | Level 1, Form Title/abstract screen |

|      |                                                                                                                                                                                                                                                                                                                                                                                  |                                           |
|------|----------------------------------------------------------------------------------------------------------------------------------------------------------------------------------------------------------------------------------------------------------------------------------------------------------------------------------------------------------------------------------|-------------------------------------------|
|      | <b>Ortega, Francisco J. Tinahones, Eva Alvarez-Moya, Cristian Ochoa, Jose M. Menchón, Fernando Fernández-Aranda.</b> Decision making impairment: A shared vulnerability in obesity, gambling disorder and substance use disorders?. <i>PLoS ONE</i> . 2016/09/30/. 11:#pages#                                                                                                    |                                           |
| 2076 | <b>Rinat Feniger-Schaal.</b> A dramatherapy case study with a young man who has dual diagnosis of intellectual disability and mental health problems.. <i>The Arts in Psychotherapy</i> . 2016/09//. 50:40                                                                                                                                                                       | Level 1, Form<br>Title/abstract<br>screen |
| 2078 | <b>Chelsea Faye Dale, Victoria Christine Fontana, Julia Anna Martinez.</b> What's your 'vice?': A combined approach to drugs and other addictive substances and activities.. <i>Addiction Research &amp; Theory</i> . 2016/09//. 24:366                                                                                                                                          | Level 1, Form<br>Title/abstract<br>screen |
| 2080 | <b>Gregorio González-Alcaide, Amador Calafat, Elisardo Becoña, Bart Thijs, Wolfgang Glänzel.</b> Co-citation analysis of articles published in substance abuse journals: Intellectual structure and research fields (2001–2012).. <i>Journal of Studies on Alcohol and Drugs</i> . 2016/09//. 77:710                                                                             | Level 1, Form<br>Title/abstract<br>screen |
| 2082 | <b>Megan Kirouac, Katie Witkiewitz, Dennis M. Donovan.</b> Client Evaluation of Treatment for alcohol use disorder in COMBINE.. <i>Journal of Substance Abuse Treatment</i> . 2016/08//. 67:38                                                                                                                                                                                   | Level 1, Form<br>Title/abstract<br>screen |
| 2083 | <b>Robert M. Bray, Charles C. Engel, Jason Williams, Lisa H. Jaycox, Marian E. Lane, Jessica K. Morgan, Jürgen Unützer.</b> Posttraumatic stress disorder in U.S. Military primary care: Trajectories and predictors of one-year prognosis.. <i>Journal of Traumatic Stress</i> . 2016/08//. 29:340                                                                              | Level 1, Form<br>Title/abstract<br>screen |
| 2087 | <b>Julie F. Brown, Johnnie Hamilton-Mason, Peter Maramaldi, L. Jarrett Barnhill.</b> Exploring perspectives of individuals with intellectual disabilities and histories of challenging behaviors about family relationships: An emergent topic in a grounded theory focus group study.. <i>Journal of Mental Health Research in Intellectual Disabilities</i> . 2016/07//. 9:133 | Level 1, Form<br>Title/abstract<br>screen |
| 2089 | <b>Debra Houry, Grant Baldwin.</b> Announcing the CDC guideline for prescribing opioids for chronic pain.. <i>Journal of Safety Research</i> . 2016/06//. 57:83                                                                                                                                                                                                                  | Level 1, Form<br>Title/abstract<br>screen |
| 2094 | <b>Wesley Sowers, Anelle Primm, Deborah Cohen, Jacquelyn Pettis, Ken Thompson.</b> Transforming psychiatry: A curriculum on recovery-oriented care.. <i>Academic Psychiatry</i> . 2016/06//. 40:461                                                                                                                                                                              | Level 1, Form<br>Title/abstract<br>screen |
| 2100 | <b>Jack Bergman, Paul Willner, Louk Vanderschuren, Bart Ellenbroek.</b> Addiction: Etiology and therapeutics.. <i>Behavioural Pharmacology</i> . 2016/04//. 27:83                                                                                                                                                                                                                | Level 1, Form<br>Title/abstract<br>screen |
| 2104 | <b>Rolf Sundet, Hesook Suzie Kim, Ottar Ness, Marit Borg, Bengt Karlsson, Stian Biong.</b> Collaboration: Suggested understandings.. <i>Australian and New Zealand Journal of Family Therapy</i> . 2016/03//. 37:93                                                                                                                                                              | Level 1, Form<br>Title/abstract<br>screen |
| 2105 | <b>Agnes Higgins, Louise Doyle, Carmel Downes, Jean Morrissey, Paul Costello, Michael Brennan, Michael Nash.</b> There is more to risk and safety planning than dramatic risks: Mental health nurses' risk assessment and safety-management practice.. <i>International Journal of Mental Health Nursing</i> . 2016/03//. 25:159                                                 | Level 1, Form<br>Title/abstract<br>screen |
| 2106 | <b>Diana L. Perry, Monica L. Daniels.</b> Implementing trauma—Informed practices in the school setting: A pilot study.. <i>School Mental Health</i> . 2016/03//. 8:177                                                                                                                                                                                                           | Level 1, Form<br>Title/abstract<br>screen |
| 2108 | <b>Vibeke Zoffmann, Åsa Hörnsten, Solveig Storbækken, Marit Graue, Bodil Rasmussen, Astrid Wahl, Marit Kirkevold.</b> Translating person-centered care into practice: A comparative analysis of motivational interviewing, illness-                                                                                                                                              | Level 1, Form<br>Title/abstract<br>screen |

|      |                                                                                                                                                                                                                                                                                                                                                                                                                                                                                                               |                                           |
|------|---------------------------------------------------------------------------------------------------------------------------------------------------------------------------------------------------------------------------------------------------------------------------------------------------------------------------------------------------------------------------------------------------------------------------------------------------------------------------------------------------------------|-------------------------------------------|
|      | integration support, and guided self-determination.. <i>Patient Education and Counseling</i> . 2016/03//. 99:400                                                                                                                                                                                                                                                                                                                                                                                              |                                           |
| 2110 | <b>Kulnaree Hanpatchaiyakul, Henrik Eriksson, Jureerat Kijssomporn, Gunnel Östlund.</b> Healthcare providers' experiences of working with alcohol addiction treatment in Thailand.. <i>Contemporary Nurse</i> . 2016/02//. 52:59                                                                                                                                                                                                                                                                              | Level 1, Form<br>Title/abstract<br>screen |
| 2111 | <b>Todd C. Edwards, Rob J. Fredericksen, Heidi M. Crane, Paul K. Crane, Mari M. Kitahata, William C. Mathews, Kenneth H. Mayer, Leo S. Morales, Michael J. Mugavero, Rosa Solorio, Frances M. Yang, Donald L. Patrick.</b> Content validity of Patient-Reported Outcomes Measurement Information System (PROMIS) items in the context of HIV clinical care.. <i>Quality of Life Research: An International Journal of Quality of Life Aspects of Treatment, Care &amp; Rehabilitation</i> . 2016/02//. 25:293 | Level 1, Form<br>Title/abstract<br>screen |
| 2113 | <b>Michael K. Monisse-Redman.</b> Collaborative practice development to improve clinical outcomes for adolescents with co-occurring mental illness, substance use and impulse control disorders.. <i>Child and adolescent health yearbook 2015..</i> 2016//. #volume#:117                                                                                                                                                                                                                                     | Level 1, Form<br>Title/abstract<br>screen |
| 2114 | <b>Nananda F. Col, Vicky Springmann.</b> Decision aids: Do they work?. <i>Handbook of health decision science..</i> 2016//. #volume#:279                                                                                                                                                                                                                                                                                                                                                                      | Level 1, Form<br>Title/abstract<br>screen |
| 2115 | <b>Ramin Mojtabai.</b> Commentary: Common themes and divergent views on heterogeneity in long-term course and outcome of adult mental and substance disorders.. <i>Long-term outcomes in psychopathology research: Rethinking the scientific agenda..</i> 2016//. #volume#:77                                                                                                                                                                                                                                 | Level 1, Form<br>Title/abstract<br>screen |
| 2116 | <b>Caroline Giroux, W. Edwin Smith.</b> Psychotherapy principles.. <i>On-call geriatric psychiatry: Handbook of principles and practice..</i> 2016//. #volume#:45                                                                                                                                                                                                                                                                                                                                             | Level 1, Form<br>Title/abstract<br>screen |
| 2118 | <b>Douglas Opler, Shaojie Han.</b> Stimulants.. <i>Pocket guide to addiction assessment and treatment..</i> 2016//. #volume#:201                                                                                                                                                                                                                                                                                                                                                                              | Level 1, Form<br>Title/abstract<br>screen |
| 2119 | <b>David R. McDuff.</b> Adjustment and anxiety disorders.. <i>Sports psychiatry..</i> 2016//. #volume#:1                                                                                                                                                                                                                                                                                                                                                                                                      | Level 1, Form<br>Title/abstract<br>screen |
| 2120 | <b>Casey T. Taft, Christopher M. Murphy, Suzannah K. Creech.</b> Adjunctive interventions.. <i>Trauma-informed treatment and prevention of intimate partner violence..</i> 2016//. #volume#:175                                                                                                                                                                                                                                                                                                               | Level 1, Form<br>Title/abstract<br>screen |
| 2121 | <b>Marie Tournier.</b> A need for personalised suicidology: Pharmacoepidemiology.. <i>Understanding suicide: From diagnosis to personalized treatment..</i> 2016//. #volume#:403                                                                                                                                                                                                                                                                                                                              | Level 1, Form<br>Title/abstract<br>screen |
| 2124 | <b>Michael Rentrop, Susanne Hörz-Sagstetter.</b> Übertragungsfokussierte Psychotherapie und Sucht. = Transference-focused psychotherapy and addiction.. <i>PTT: Persönlichkeitsstörungen Theorie und Therapie</i> . 2016//. 20:43                                                                                                                                                                                                                                                                             | Level 1, Form<br>Title/abstract<br>screen |
| 2130 | <b>Denise M. Connor, G. David Elkin, Kewchang Lee, Vanessa Thompson, Heather Whelan.</b> The unbefriended patient: An exercise in ethical clinical reasoning.. <i>Journal of General Internal Medicine</i> . 2016/01//. 31:128                                                                                                                                                                                                                                                                                | Level 1, Form<br>Title/abstract<br>screen |
| 2131 | <b>Kim Markie-Frost.</b> The challenges and possibilities of social work with indigenous families.. <i>International Journal of Disability, Development and Education</i> . 2016/01//. 63:140                                                                                                                                                                                                                                                                                                                 | Level 1, Form<br>Title/abstract<br>screen |
| 2134 | <b>Mary Ann Burg, Oliver Oyama.</b> The behavioral health specialist in primary care: Skills for integrated practice.. #journal#. 2016//. #volume#:#pages#                                                                                                                                                                                                                                                                                                                                                    | Level 1, Form<br>Title/abstract           |



|      |                                                                                                                                                                                                                                                                                                                                                                                           |                                           |
|------|-------------------------------------------------------------------------------------------------------------------------------------------------------------------------------------------------------------------------------------------------------------------------------------------------------------------------------------------------------------------------------------------|-------------------------------------------|
|      |                                                                                                                                                                                                                                                                                                                                                                                           | screen                                    |
| 2135 | <b>Damita SunWolf LaRue.</b> Effects of history on Native American Indians: Providing culturally-sensitive therapeutic care.. <i>Dissertation Abstracts International: Section B: The Sciences and Engineering</i> . 2016///. 77:#pages#                                                                                                                                                  | Level 1, Form<br>Title/abstract<br>screen |
| 2136 | <b>Florencia Lebensohn-Chialvo.</b> Adaptive significance of personal pronoun use in families of adolescent substance abusers.. <i>Dissertation Abstracts International: Section B: The Sciences and Engineering</i> . 2016///. 76:#pages#                                                                                                                                                | Level 1, Form<br>Title/abstract<br>screen |
| 2137 | <b>Bethany Remeniuk.</b> Capturing affective dimensions of cancer-induced bone pain preclinically.. <i>Dissertation Abstracts International: Section B: The Sciences and Engineering</i> . 2016///. 76:#pages#                                                                                                                                                                            | Level 1, Form<br>Title/abstract<br>screen |
| 2138 | <b>Christopher L. Smith.</b> Role of Substance Use and Working Alliance on relapse in treatment for early psychosis.. <i>Dissertation Abstracts International: Section B: The Sciences and Engineering</i> . 2016///. 76:#pages#                                                                                                                                                          | Level 1, Form<br>Title/abstract<br>screen |
| 2139 | <b>Songyuan Tang.</b> Factors associated with effectiveness of Methadone Maintenance Treatment in Yunnan province of China.. <i>Dissertation Abstracts International: Section B: The Sciences and Engineering</i> . 2016///. 76:#pages#                                                                                                                                                   | Level 1, Form<br>Title/abstract<br>screen |
| 2140 | <b>Kathleen M. Grubbs, John C. Fortney, Jeffrey M. Pyne, Teresa Hudson, William Mark Moore, Paul Custer, Ronald Schneider, Paula P. Schnurr.</b> Predictors of initiation and engagement of cognitive processing therapy among veterans with PTSD enrolled in collaborative care.. <i>Journal of Traumatic Stress</i> . 2015/12//. 28:580                                                 | Level 1, Form<br>Title/abstract<br>screen |
| 2142 | <b>Lisa Tlach, Caroline Wüsten, Anne Daubmann, Sarah Liebherz, Martin Härter, Jörg Dirmaier.</b> Information and decision-making needs among people with mental disorders: A systematic review of the literature.. <i>Health Expectations: An International Journal of Public Participation in Health Care &amp; Health Policy</i> . 2015/12//. 18:1856                                   | Level 1, Form<br>Title/abstract<br>screen |
| 2143 | <b>Rahul Shidhaye, Crick Lund, Dan Chisholm.</b> Closing the treatment gap for mental, neurological and substance use disorders by strengthening existing health care platforms: Strategies for delivery and integration of evidence-based interventions.. <i>International Journal of Mental Health Systems</i> . 2015/12//. 9:#pages#                                                   | Level 1, Form<br>Title/abstract<br>screen |
| 2147 | <b>Douglas Zatzick, Stephen S. O'Connor, Joan Russo, Jin Wang, Nigel Bush, Jeff Love, Roselyn Peterson, Leah Ingraham, Doyanne Darnell, Lauren Whiteside, Erik Van Eaton.</b> Technology-enhanced stepped collaborative care targeting posttraumatic stress disorder and comorbidity after injury: A randomized controlled trial.. <i>Journal of Traumatic Stress</i> . 2015/10//. 28:391 | Level 1, Form<br>Title/abstract<br>screen |
| 2149 | <b>Traci C. Green, Emily F. Dauria, Jeffrey Bratberg, Corey S. Davis, Alexander Y. Walley.</b> Orienting patients to greater opioid safety: Models of community pharmacy-based naloxone.. <i>Harm Reduction Journal</i> . 2015/08/06/. 12:#pages#                                                                                                                                         | Level 1, Form<br>Title/abstract<br>screen |
| 2150 | <b>Neil J. Kitchiner.</b> Review of Care of military service members, veterans, and their families.. <i>The British Journal of Psychiatry</i> . 2015/08//. 207:180                                                                                                                                                                                                                        | Level 1, Form<br>Title/abstract<br>screen |
| 2151 | <b>Mary P. Ghods, Ian T. Schmid, Carol A. Pamer, Brian M. Lappin, Dale C. Slavin.</b> Developing and initiating validation of a model opioid patient-prescriber agreement as a tool for patient-centered pain treatment.. <i>The Patient: Patient-Centered Outcomes Research</i> . 2015/08//. 8:349                                                                                       | Level 1, Form<br>Title/abstract<br>screen |
| 2153 | <b>Richard M. Hoffman, Andrew L. Sussman, Christina M. Getrich, Robert L. Rhyne, Richard E. Crowell, Kathryn L. Taylor, Ellen J. Reifler, Pamela</b>                                                                                                                                                                                                                                      | Level 1, Form<br>Title/abstract           |

|      |                                                                                                                                                                                                                                                                                                                                                                                                                                        |                                           |
|------|----------------------------------------------------------------------------------------------------------------------------------------------------------------------------------------------------------------------------------------------------------------------------------------------------------------------------------------------------------------------------------------------------------------------------------------|-------------------------------------------|
|      | <b>H. Wescott, Ambroshia M. Murrietta, Ali I. Saeed, Shiraz I. Mishra.</b> Attitudes and beliefs of primary care providers in New Mexico about lung cancer screening using low-dose computed tomography.. <i>Preventing Chronic Disease: Public Health Research, Practice, and Policy</i> . 2015/07/09/. 12:#pages#                                                                                                                    | screen                                    |
| 2157 | <b>George De Leon.</b> 'The gold standard' and related considerations for a maturing science of substance abuse treatment. Therapeutic communities; A case in point.. <i>Substance Use &amp; Misuse</i> . 2015/07//. 50:1106                                                                                                                                                                                                           | Level 1, Form<br>Title/abstract<br>screen |
| 2158 | <b>Susan E. Collins, Véronique S. Grazioli, Nicole I. Torres, Emily M. Taylor, Connor B. Jones, Gail E. Hoffman, Laura Haelsig, Mengdan D. Zhu, Alyssa S. Hatsukami, Molly J. Koker, Patrick Herndon, Shawna M. Greenleaf, Parker E. Dean.</b> Qualitatively and quantitatively evaluating harm-reduction goal setting among chronically homeless individuals with alcohol dependence.. <i>Addictive Behaviors</i> . 2015/06//. 45:184 | Level 1, Form<br>Title/abstract<br>screen |
| 2159 | <b>Sanno E. Zack, Louis G. Castonguay, James F. Boswell, Andrew A. McAleavey, Robert Adelman, David R. Kraus, George A. Pate.</b> Attachment history as a moderator of the alliance outcome relationship in adolescents.. <i>Psychotherapy</i> . 2015/06//. 52:258                                                                                                                                                                     | Level 1, Form<br>Title/abstract<br>screen |
| 2164 | <b>Paula C. G. Alves, Célia M. D. Sales, Mark Ashworth.</b> Personalising the evaluation of substance misuse treatment: A new approach to outcome measurement.. <i>International Journal of Drug Policy</i> . 2015/04//. 26:333                                                                                                                                                                                                        | Level 1, Form<br>Title/abstract<br>screen |
| 2165 | <b>Udi E. Ghitza.</b> Needed relapse-prevention research on novel framework (ASPIRE model) for substance use disorders treatment.. <i>Frontiers in Psychiatry</i> . 2015/03/06/. 6:#pages#                                                                                                                                                                                                                                             | Level 2, Form<br>Full Text<br>Screening   |
| 2166 | <b>Arieahn Matamonasa-Bennett.</b> 'A disease of the outside people': Native American men's perceptions of intimate partner violence.. <i>Psychology of Women Quarterly</i> . 2015/03//. 39:20                                                                                                                                                                                                                                         | Level 1, Form<br>Title/abstract<br>screen |
| 2168 | <b>Christina Brezing, Maria Ferrara, Oliver Freudenreich.</b> The syndemic illness of HIV and trauma: Implications for a trauma-informed model of care.. <i>Psychosomatics: Journal of Consultation and Liaison Psychiatry</i> . 2015/03//. 56:107                                                                                                                                                                                     | Level 1, Form<br>Title/abstract<br>screen |
| 2170 | <b>J. MacLaren Kelly, Ewgeni Jakubovski, Michael H. Bloch.</b> Prognostic subgroups for remission and response in the Coordinated Anxiety Learning and Management (CALM) trial.. <i>The Journal of Clinical Psychiatry</i> . 2015/03//. 76:267                                                                                                                                                                                         | Level 1, Form<br>Title/abstract<br>screen |
| 2172 | <b>Iain H. McKillop.</b> Alcohol and the brain-liver axis: A further case of mind over matter?. <i>Alcoholism: Clinical and Experimental Research</i> . 2015/03//. 39:405                                                                                                                                                                                                                                                              | Level 1, Form<br>Title/abstract<br>screen |
| 2175 | <b>Bradley V. Watts, Paula P. Schnurr, Maha Zayed, Yinong Young-Xu, Patricia Stender, Hilary Llewellyn-Thomas.</b> A randomized controlled clinical trial of a patient decision aid for posttraumatic stress disorder.. <i>Psychiatric Services</i> . 2015/02/01/. 66:149                                                                                                                                                              | Level 1, Form<br>Title/abstract<br>screen |
| 2176 | <b>Rachel Kimerling, Lori A. Bastian, Bevanne A. Bean-Mayberry, Meggan M. Bucossi, Diane V. Carney, Karen M. Goldstein, Ciaran S. Phibbs, Alyssa Pomernacki, Anne G. Sadler, Elizabeth M. Yano, Susan M. Frayne.</b> Patient-centered mental health care for female veterans.. <i>Psychiatric Services</i> . 2015/02/01/. 66:155                                                                                                       | Level 1, Form<br>Title/abstract<br>screen |
| 2178 | <b>Lori Raney, Gina Lasky, Clare Scott.</b> The collaborative care team in action.. <i>Integrated care: Working at the interface of primary care and behavioral health</i> .. 2015///. #volume#:17                                                                                                                                                                                                                                     | Level 1, Form<br>Title/abstract<br>screen |

|      |                                                                                                                                                                                                                                                                                                                                                                                                                                                                |                                     |
|------|----------------------------------------------------------------------------------------------------------------------------------------------------------------------------------------------------------------------------------------------------------------------------------------------------------------------------------------------------------------------------------------------------------------------------------------------------------------|-------------------------------------|
| 2179 | <b>Joseph Parks.</b> Behavioral health homes.. <i>Integrated care: Working at the interface of primary care and behavioral health..</i> 2015///. #volume#:193                                                                                                                                                                                                                                                                                                  | Level 2, Form Full Text Screening   |
| 2180 | <b>W. Scott Craig.</b> The importance of integrated psychological services in primary care.. <i>Integrated psychological services in primary care..</i> 2015///. #volume#:3                                                                                                                                                                                                                                                                                    | Level 1, Form Title/abstract screen |
| 2181 | <b>Ou Sha, Yue Hao, Eric Yu-Pang Cho, Li Zhou.</b> Clinical applications and side effects of ketamine.. <i>Ketamine: Use and abuse..</i> 2015///. #volume#:13                                                                                                                                                                                                                                                                                                  | Level 1, Form Title/abstract screen |
| 2182 | <b>Kimberly Stoner.</b> Laboratory tests.. <i>Psychiatric care of the medical patient..</i> 2015///. #volume#:105                                                                                                                                                                                                                                                                                                                                              | Level 1, Form Title/abstract screen |
| 2183 | <b>Kenneth Wayne Phelps, Ashley Blackmon Jones, Rebecca Ann Payne.</b> The interplay between mental and sexual health.. <i>Systemic sex therapy..</i> 2015///. #volume#:255                                                                                                                                                                                                                                                                                    | Level 1, Form Title/abstract screen |
| 2184 | <b>Maxine Stitzer, Nancy Petry.</b> Contingency management.. <i>The American Psychiatric Publishing textbook of substance abuse treatment..</i> 2015///. #volume#:423                                                                                                                                                                                                                                                                                          | Level 1, Form Title/abstract screen |
| 2185 | <b>Henry J. Steadman, Brian Case, Chanson Noether, Samantha Califano, Susan Salasin.</b> From resource center to systems change: The GAINS Model.. <i>The sequential intercept model and criminal justice: Promoting community alternatives for individuals with serious mental illness..</i> 2015///. #volume#:137                                                                                                                                            | Level 1, Form Title/abstract screen |
| 2186 | <b>Lorraine Greaves, Nancy Poole, Ellexis Boyle.</b> The future of transdisciplinarity in addiction.. <i>Transforming addiction: Gender, trauma, transdisciplinarity..</i> 2015///. #volume#:216                                                                                                                                                                                                                                                               | Level 2, Form Full Text Screening   |
| 2187 | <b>Patrick J. Raue, Patricia A. Areán.</b> Interpersonal psychotherapy for late-life depression.. <i>Treatment of late-life depression, anxiety, trauma, and substance abuse..</i> 2015///. #volume#:71                                                                                                                                                                                                                                                        | Level 1, Form Title/abstract screen |
| 2188 | <b>Frederik Haarig, Stephan Mühlig.</b> Nutzung von Conjoint-Analysen zur Messung von Therapiezielpräferenzen aus Patientenperspektive in der Behandlung psychischer Störungen: Eine systematische Literaturübersicht. = Conjoint analysis for measuring treatment preferences of patients with psychiatric disorders: A systematic literature review.. <i>Zeitschrift für Klinische Psychologie und Psychotherapie: Forschung und Praxis.</i> 2015/01//. 44:1 | Level 1, Form Title/abstract screen |
| 2190 | <b>Molly R. Wolf, Thomas H. Nochajski, Hon. Mark G. Farrell.</b> The effects of childhood sexual abuse and other trauma on drug court participants.. <i>Journal of Social Work Practice in the Addictions.</i> 2015/01//. 15:44                                                                                                                                                                                                                                | Level 1, Form Title/abstract screen |
| 2196 | <b>Lori Holleran Steiker.</b> Trauma-Informed Care and Addiction Recovery: An Interview With Nancy J. Smyth, PhD, LCSW.. <i>Journal of Social Work Practice in the Addictions.</i> 2015/01//. 15:134                                                                                                                                                                                                                                                           | Level 2, Form Full Text Screening   |
| 2197 | <b>Hal Arkowitz, William R. Miller, Stephen Rollnick.</b> Motivational interviewing in the treatment of psychological problems., 2nd ed.. #journal#. 2015///. #volume#:#pages#                                                                                                                                                                                                                                                                                 | Level 1, Form Title/abstract screen |
| 2198 | <b>Jessica Lynn Larsen.</b> Trauma and the justice-involved veteran.. <i>Dissertation Abstracts International: Section B: The Sciences and Engineering.</i> 2015///. 76:#pages#                                                                                                                                                                                                                                                                                | Level 1, Form Title/abstract screen |
| 2199 | <b>John S. Wodarski, Sarah V. Curtis.</b> E-therapy for substance abuse and comorbidity.. #journal#. 2015///. #volume#:#pages#                                                                                                                                                                                                                                                                                                                                 | Level 1, Form Title/abstract screen |

|      |                                                                                                                                                                                                                                                                                                                                             |                                           |
|------|---------------------------------------------------------------------------------------------------------------------------------------------------------------------------------------------------------------------------------------------------------------------------------------------------------------------------------------------|-------------------------------------------|
| 2202 | <b>Thomas J. Waltz, Duncan G. Campbell, JoAnn E. Kirchner, Anayansi Lombardero, Cory Bolkan, Kara Zivin, Andrew B. Lanto, Edmund F. Chaney, Lisa V. Rubenstein.</b> Veterans with depression in primary care: Provider preferences, matching, and care satisfaction.. <i>Families, Systems, &amp; Health</i> . 2014/12//. 32:367            | Level 1, Form<br>Title/abstract<br>screen |
| 2203 | <b>My Frankl, Björn Philips, Peter Wennberg.</b> Psychotherapy role expectations and experiences—Discrepancy and therapeutic alliance among patients with substance use disorders.. <i>Psychology and Psychotherapy: Theory, Research and Practice</i> . 2014/12//. 87:411                                                                  | Level 1, Form<br>Title/abstract<br>screen |
| 2204 | <b>Alexis Kuerbis, Stephen Armeli, Frederick Muench, Jon Morgenstern.</b> Profiles of confidence and commitment to change as predictors of moderated drinking: A person-centered approach.. <i>Psychology of Addictive Behaviors</i> . 2014/12//. 28:1065                                                                                   | Level 1, Form<br>Title/abstract<br>screen |
| 2205 | <b>Ingo Schäfer, Lil Gromus, Armita Atabaki, Silke Pawils, Uwe Verthein, Jens Reimer, Bernd Schulte, Marcus Martens.</b> Are experiences of sexual violence related to special needs in patients with substance use disorders? A study in opioid-dependent patients.. <i>Addictive Behaviors</i> . 2014/12//. 39:1691                       | Level 1, Form<br>Title/abstract<br>screen |
| 2206 | <b>Beth D. Darnall, Michael E. Schatman.</b> Urine drug screening: Necessary or alienating?. <i>Pain Medicine</i> . 2014/12//. 15:1999                                                                                                                                                                                                      | Level 1, Form<br>Title/abstract<br>screen |
| 2211 | <b>Mustafa C. Karakus.</b> Affordable Care Act and behavioral health services: Special section editor's note.. <i>The Journal of Behavioral Health Services &amp; Research</i> . 2014/10//. 41:408                                                                                                                                          | Level 1, Form<br>Title/abstract<br>screen |
| 2215 | <b>Rachael Hinton, Pat Bradley, Thomas Trauer, Tricia Nagel.</b> Strengthening acute inpatient mental health care for Indigenous clients.. <i>Advances in Mental Health</i> . 2014/08//. 12:125                                                                                                                                             | Level 1, Form<br>Title/abstract<br>screen |
| 2216 | <b>Kurt Kroenke, Erin E. Krebs, Jingwei Wu, Zhangsheng Yu, Neale R. Chumbler, Matthew J. Bair.</b> Telecare collaborative management of chronic pain in primary care: A randomized clinical trial.. <i>JAMA: Journal of the American Medical Association</i> . 2014/07/16/. 312:240                                                         | Level 1, Form<br>Title/abstract<br>screen |
| 2219 | <b>Jessica Roberts Williams, Kevin D. Hennessy.</b> Increasing adoption of comparative effectiveness research in community behavioral health: Introduction to special section.. <i>The Journal of Behavioral Health Services &amp; Research</i> . 2014/07//. 41:254                                                                         | Level 1, Form<br>Title/abstract<br>screen |
| 2220 | <b>Jessica Roberts Williams, Stephen J. Tregear, Tracy Dusablon, Lizbeth E. Caceda-Castro, Kristin J. Miller, Gary Hill, Kevin D. Hennessy.</b> Increasing adoption of comparative effectiveness research in community behavioral health: Methodology.. <i>The Journal of Behavioral Health Services &amp; Research</i> . 2014/07//. 41:258 | Level 1, Form<br>Title/abstract<br>screen |
| 2223 | <b>Noell L. Rowan, Sandra S. Butler.</b> Resilience in attaining and sustaining sobriety among older lesbians with alcoholism.. <i>Journal of Gerontological Social Work</i> . 2014/05//. 57:176                                                                                                                                            | Level 1, Form<br>Title/abstract<br>screen |
| 2224 | <b>Susan H. McDaniel, Frank V. III deGruy.</b> An introduction to primary care and psychology.. <i>American Psychologist</i> . 2014/05//May-Jun, 2014. 69:325                                                                                                                                                                               | Level 1, Form<br>Title/abstract<br>screen |
| 2225 | <b>Debra Sheets.</b> Review of Transgender Tuesdays: A clinic in the tenderloin.. <i>Journal of Gerontological Social Work</i> . 2014/05//. 57:413                                                                                                                                                                                          | Level 1, Form<br>Title/abstract<br>screen |
| 2226 | <b>Melissa M. Goldstein.</b> Health information privacy and health information                                                                                                                                                                                                                                                              | Level 1, Form                             |

|      |                                                                                                                                                                                                                                                                                                                                                                                            |                                         |
|------|--------------------------------------------------------------------------------------------------------------------------------------------------------------------------------------------------------------------------------------------------------------------------------------------------------------------------------------------------------------------------------------------|-----------------------------------------|
|      | technology in the US correctional setting.. <i>American Journal of Public Health</i> . 2014/05//. 104:803                                                                                                                                                                                                                                                                                  | Title/abstract screen                   |
| 2227 | <b>Jeffrey P. Haibach, Gregory P. Beehler, Katherine M. Dollar, Deborah S. Finnell.</b> Moving toward integrated behavioral intervention for treating multimorbidity among chronic pain, depression, and substance-use disorders in primary care.. <i>Medical Care</i> . 2014/04//. 52:322                                                                                                 | Level 1, Form<br>Title/abstract screen  |
| 2228 | <b>Stephanie Rodgers, Martin Grosse Holtforth, Mario Müller, Michael P. Hengartner, Wulf Rössler, Vladeta Ajdacic-Gross.</b> Symptom-based subtypes of depression and their psychosocial correlates: A person-centered approach focusing on the influence of sex.. <i>Journal of Affective Disorders</i> . 2014/03/01/. 156:92                                                             | Level 1, Form<br>Title/abstract screen  |
| 2229 | <b>Patricia A. Cioe.</b> 'Regarding: Cardiovascular risk-factor knowledge and risk perception among HIV-infected adults': Reply to the editor.. <i>JANAC: Journal of the Association of Nurses in AIDS Care</i> . 2014/03//. 25:106                                                                                                                                                        | Level 1, Form<br>Title/abstract screen  |
| 2230 | <b>Gerhard H. H. Müller-Schwefe, Antonie M. Wimmer, Joachim Dejonckheere, Antje Eggers, Renato Vellucci.</b> Patients' and physicians' perspectives on opioid therapy for chronic cancer and musculoskeletal pain in Germany, Italy, and Turkey: Pain Research (PARES) Survey.. <i>Current Medical Research and Opinion</i> . 2014/03//. 30:339                                            | Level 1, Form<br>Title/abstract screen  |
| 2231 | <b>Josephine D. Korchmaros, Sally J. Stevens.</b> Examination of the role of therapeutic alliance, treatment dose, and treatment completion in the effectiveness of The Seven Challenges.. <i>Child &amp; Adolescent Social Work Journal</i> . 2014/02//. 31:1                                                                                                                             | Level 1, Form<br>Title/abstract screen  |
| 2233 | <b>David B. Bekelman, Stephanie Hooker, Carolyn T. Nowels, Deborah S. Main, Paula Meek, Connor McBryde, Brack Hattler, Karl A. Lorenz, Paul A. Heidenreich.</b> Feasibility and acceptability of a collaborative care intervention to improve symptoms and quality of life in chronic heart failure: Mixed methods pilot trial.. <i>Journal of Palliative Medicine</i> . 2014/02//. 17:145 | Level 1, Form<br>Title/abstract screen  |
| 2235 | <b>Ritu Chahil.</b> Narcissism.. <i>Essential psychopathology casebook</i> .. 2014//. #volume#:537                                                                                                                                                                                                                                                                                         | Level 1, Form<br>Title/abstract screen  |
| 2236 | <b>Edna Hamera.</b> Motivational interviewing.. <i>Psychotherapy for the advanced practice psychiatric nurse: A how-to guide for evidence-based practice</i> .. 2014//. #volume#:299                                                                                                                                                                                                       | Level 2, Form<br>Full Text<br>Screening |
| 2237 | <b>Susie Adams, Deborah Antai-Otong.</b> Psychotherapeutic approaches for addictions and related disorders.. <i>Psychotherapy for the advanced practice psychiatric nurse: A how-to guide for evidence-based practice</i> .. 2014//. #volume#:565                                                                                                                                          | Level 2, Form<br>Full Text<br>Screening |
| 2238 | <b>Anne C. Dobbmeyer, Jeffrey L. Goodie, Christopher L. Hunter.</b> Health care provider and system interventions promoting health behavior change.. <i>The handbook of health behavior change</i> .. 2014//. #volume#:417                                                                                                                                                                 | Level 1, Form<br>Title/abstract screen  |
| 2243 | <b>Scott T. Walters, Steven J. Ondersma, Karen S. Ingersoll, Mayra Rodriguez, Jennifer Lerch, Matthew E. Rossheim, Faye S. Taxman.</b> MAPIT: Development of a web-based intervention targeting substance abuse treatment in the criminal justice system.. <i>Journal of Substance Abuse Treatment</i> . 2014/01//. 46:60                                                                  | Level 1, Form<br>Title/abstract screen  |
| 2244 | <b>Jeanette Waxmonsky, Amy M. Kilbourne, David E. Goodrich, Kristina M. Nord, Zongshan Lai, Christina Laird, Julia Clogston, Hyungjin Myra Kim, Christopher Miller, Mark S. Bauer.</b> Enhanced fidelity to treatment for bipolar disorder: Results From a randomized controlled implementation trial..                                                                                    | Level 1, Form<br>Title/abstract screen  |

|      |                                                                                                                                                                                                                                                                                                                                                    |                                           |
|------|----------------------------------------------------------------------------------------------------------------------------------------------------------------------------------------------------------------------------------------------------------------------------------------------------------------------------------------------------|-------------------------------------------|
|      | <i>Psychiatric Services</i> . 2014/01/01/. 65:81                                                                                                                                                                                                                                                                                                   |                                           |
| 2250 | <b>Myrna M. Weissman, Sidney H. Hankerson, Pamela Scorza, Mark Olsson, Helena Verdelli, Steven Shea, Rafael Lantigua, Milton Wainberg.</b> Interpersonal counseling (IPC) for depression in primary care.. <i>American Journal of Psychotherapy</i> . 2014///. 68:359                                                                              | Level 1, Form<br>Title/abstract<br>screen |
| 2251 | <b>Ellen Frank, Fiona C. Ritchey, Jessica C. Levenson.</b> Is interpersonal psychotherapy infinitely adaptable? A compendium of the multiple modifications of IPT.. <i>American Journal of Psychotherapy</i> . 2014///. 68:385                                                                                                                     | Level 1, Form<br>Title/abstract<br>screen |
| 2252 | <b>Neal Adams, Diane M. Grieder.</b> Treatment planning for person-centered care: Shared decision making for whole health., 2nd ed.. #journal#. 2014///. #volume#:#pages#                                                                                                                                                                          | Level 1, Form<br>Title/abstract<br>screen |
| 2253 | <b>LaTrica Y. Henegar.</b> A qualitative study of educator and counselor interdisciplinary collaboration regarding adolescent substance abusers' academic attainment.. <i>Dissertation Abstracts International Section A: Humanities and Social Sciences</i> . 2014///. 74:#pages#                                                                 | Level 1, Form<br>Title/abstract<br>screen |
| 2254 | <b>Tanya R. Sorrell.</b> Mental health treatment preferences for persons of Mexican heritage.. <i>Dissertation Abstracts International: Section B: The Sciences and Engineering</i> . 2014///. 74:#pages#                                                                                                                                          | Level 1, Form<br>Title/abstract<br>screen |
| 2255 | <b>James John Weidel.</b> The relationship of temporal discounting and working alliance to substance abuse treatment process in hispanic adolescents.. <i>Dissertation Abstracts International: Section B: The Sciences and Engineering</i> . 2014///. 75:#pages#                                                                                  | Level 2, Form<br>Full Text<br>Screening   |
| 2256 | <b>Garry Williamson.</b> The effect of counselor changes and ruptures in the therapeutic alliance on treatment outcome for methadone maintenance clients in an outpatient clinic.. <i>Dissertation Abstracts International: Section B: The Sciences and Engineering</i> . 2014///. 75:#pages#                                                      | Level 2, Form<br>Full Text<br>Screening   |
| 2258 | <b>Laura J. Holt, Stephen Armeli, Howard Tennen, Carol S. Austad, Sarah A. Raskin, Carolyn R. Fallahi, Rebecca Wood, Rivkah I. Rosen, Meredith K. Ginley, Godfrey D. Pearlson.</b> A person-centered approach to understanding negative reinforcement drinking among first year college students.. <i>Addictive Behaviors</i> . 2013/12//. 38:2937 | Level 1, Form<br>Title/abstract<br>screen |
| 2259 | <b>Vivian Barnett Brown, Maxine Harris, Roger Fallot.</b> Moving toward trauma-informed practice in addiction treatment: A collaborative model of agency assessment.. <i>Journal of Psychoactive Drugs</i> . 2013/11//. 45:386                                                                                                                     | Level 2, Form<br>Full Text<br>Screening   |
| 2262 | <b>Catrin Lewis, Neil Roberts, Tracey Vick, Jonathan I. Bisson.</b> Development of a guided self-help (GSH) program for the treatment of mild-to-moderate posttraumatic stress disorder (PTSD).. <i>Depression and Anxiety</i> . 2013/11//. 30:1121                                                                                                | Level 1, Form<br>Title/abstract<br>screen |
| 2263 | <b>Thérèse von Braun, Sam Larsson, Yvonne Sjöblom.</b> Chapter 10. Perspectives on treatment, alliance and narratives concerning substance use-related dependency.. <i>Substance Use &amp; Misuse</i> . 2013/11//. 48:1386                                                                                                                         | Level 2, Form<br>Full Text<br>Screening   |
| 2265 | <b>Christoph Flückiger, Aaron C. Del Re, Adam O. Horvath, Dianne Symonds, Michael Ackert, Bruce E. Wampold.</b> Substance use disorders and racial/ethnic minorities matter: A meta-analytic examination of the relation between alliance and outcome.. <i>Journal of Counseling Psychology</i> . 2013/10//. 60:610                                | Level 1, Form<br>Title/abstract<br>screen |
| 2266 | <b>Hein A. de Haan, Evelien A. G. Joosten, Lydia de Haan, Arnt F. A. Schellekens, Jan K. Buitelaar, Job van der Palen, Cor A. J. De Jong.</b> A family history of alcoholism relates to alexithymia in substance use disorder                                                                                                                      | Level 1, Form<br>Title/abstract<br>screen |

|      |                                                                                                                                                                                                                                                                                                                 |                                           |
|------|-----------------------------------------------------------------------------------------------------------------------------------------------------------------------------------------------------------------------------------------------------------------------------------------------------------------|-------------------------------------------|
|      | patients.. <i>Comprehensive Psychiatry</i> . 2013/10//. 54:911                                                                                                                                                                                                                                                  |                                           |
| 2269 | <b>John Oldham</b> . From the editor: Integrated care.. <i>Journal of Psychiatric Practice</i> . 2013/09//. 19:343                                                                                                                                                                                              | Level 1, Form<br>Title/abstract<br>screen |
| 2270 | <b>Arthur M. Michalek</b> . Back to the future... the challenge for cancer education and training in developing countries.. <i>Journal of Cancer Education</i> . 2013/09//. 28:395                                                                                                                              | Level 1, Form<br>Title/abstract<br>screen |
| 2273 | <b>Henry Chung, Azalea Kim, Charles J. Neighbors, Johnine Cummings, Sally Ricketts, Megan A. O'Grady, Donald Raum</b> . Early experience of a pilot intervention for patients with depression and chronic medical illness in an urban ACO.. <i>General Hospital Psychiatry</i> . 2013/09//Sep-Oct, 2013. 35:468 | Level 1, Form<br>Title/abstract<br>screen |
| 2274 | <b>Yolonda R. Pickett, Kisha N. Bazelais, Martha L. Bruce</b> . Late-life depression in older African Americans: A comprehensive review of epidemiological and clinical data.. <i>International Journal of Geriatric Psychiatry</i> . 2013/09//. 28:903                                                         | Level 1, Form<br>Title/abstract<br>screen |
| 2279 | <b>Jane M. Plagge, Mary W. Lu, Travis I. Lovejoy, Andrea I. Karl, Steven K. Dobscha</b> . Treatment of comorbid pain and PTSD in returning veterans: A collaborative approach utilizing behavioral activation.. <i>Pain Medicine</i> . 2013/08//. 14:1164                                                       | Level 1, Form<br>Title/abstract<br>screen |
| 2283 | <b>Margaret W. Bultas, Mary P. Curtis</b> . Using simulation to teach child injury prevention to mothers recovering from substance abuse.. <i>Journal of Community Health Nursing</i> . 2013/07//. 30:155                                                                                                       | Level 1, Form<br>Title/abstract<br>screen |
| 2284 | <b>Nicola Thomas, Rosamund Bryar</b> . An evaluation of self-management package for people with diabetes at risk of chronic kidney disease.. <i>Primary Health Care Research and Development</i> . 2013/07//. 14:270                                                                                            | Level 1, Form<br>Title/abstract<br>screen |
| 2287 | <b>Brad Donohue, Michelle Pitts, Yulia Gavrilova, Ashley Ayarza, Kristina I. Cintron</b> . A culturally sensitive approach to treating substance abuse in athletes using evidence-supported methods.. <i>Journal of Clinical Sport Psychology</i> . 2013/06//. 7:98                                             | Level 1, Form<br>Title/abstract<br>screen |
| 2289 | <b>Jennifer S. Funderburk, Robyn L. Fielder</b> . A primary mental health care model for advanced practicum training in a university health clinic.. <i>Training and Education in Professional Psychology</i> . 2013/05//. 7:112                                                                                | Level 1, Form<br>Title/abstract<br>screen |
| 2291 | <b>Carolyn Baird</b> . Delivering trauma-informed care.. <i>Journal of Addictions Nursing</i> . 2013/04//Apr-Jun, 2013. 24:126                                                                                                                                                                                  | Level 1, Form<br>Title/abstract<br>screen |
| 2293 | <b>Robert M. Post, Peter Kalivas</b> . Bipolar disorder and substance misuse: Pathological and therapeutic implications of their comorbidity and cross-sensitisation.. <i>The British Journal of Psychiatry</i> . 2013/03//. 202:172                                                                            | Level 1, Form<br>Title/abstract<br>screen |
| 2294 | <b>Ellen J. Hahn, Mary Kay Rayens, Nancy York</b> . Readiness for smoke-free policy and overall strength of tobacco control in rural tobacco-growing communities.. <i>Health Promotion Practice</i> . 2013/03//. 14:238                                                                                         | Level 1, Form<br>Title/abstract<br>screen |
| 2295 | <b>Kurt B. Angstman, Norman H. Rasmussen, Kathy L. MacLaughlin, Jeffrey P. Staab</b> . Inter-relationship of the functional status question of the PHQ-9 and depression remission after six months of collaborative care management.. <i>Journal of Psychiatric Research</i> . 2013/03//. 47:418                | Level 1, Form<br>Title/abstract<br>screen |
| 2298 | <b>Lianne Fuino Estefan, Martha L. Coulter, Carla L. VandeWeerd, Mary Armstrong, Peter Gorski</b> . Relationships between stressors and parenting attitudes in a child welfare parenting program.. <i>Journal of Child and Family</i>                                                                           | Level 1, Form<br>Title/abstract<br>screen |

|      |                                                                                                                                                                                                                                                                                                                                                                        |                                     |
|------|------------------------------------------------------------------------------------------------------------------------------------------------------------------------------------------------------------------------------------------------------------------------------------------------------------------------------------------------------------------------|-------------------------------------|
|      | <i>Studies</i> . 2013/02//. 22:199                                                                                                                                                                                                                                                                                                                                     |                                     |
| 2300 | <b>Thomas J. Doyle, Peter D. Friedmann, William H. Zywiak.</b> Management of patients with alcohol dependence in recovery: Options for maintenance and anticipating and managing relapse in primary care.. <i>Addressing unhealthy alcohol use in primary care</i> .. 2013///. #volume#:85                                                                             | Level 1, Form Title/abstract screen |
| 2301 | <b>Laura Weiss Roberts, Kim Bullock.</b> Ethical considerations in caring for people living with addictions.. <i>Applied ethics in mental health care: An interdisciplinary reader</i> .. 2013///. #volume#:223                                                                                                                                                        | Level 2, Form Full Text Screening   |
| 2302 | <b>Jennifer A. Robinson, James M. Bolton.</b> Substance use in response to anxiety disorders.. <i>Comprehensive addictive behaviors and disorders, Vol. 1: Principles of addiction</i> .. 2013///. #volume#:507                                                                                                                                                        | Level 1, Form Title/abstract screen |
| 2303 | <b>Kevin Huckshorn, Janice L. LeBel.</b> Trauma-informed care.. <i>Modern community mental health: An interdisciplinary approach</i> .. 2013///. #volume#:62                                                                                                                                                                                                           | Level 1, Form Title/abstract screen |
| 2304 | <b>David Murphy, Stephen Joseph.</b> Facilitating posttraumatic growth through relational depth.. <i>Relational depth: New perspectives and developments</i> .. 2013///. #volume#:90                                                                                                                                                                                   | Level 1, Form Title/abstract screen |
| 2305 | <b>Donna Sabella.</b> Health issues and interactions with adult survivors.. <i>Sex trafficking: A clinical guide for nurses</i> .. 2013///. #volume#:151                                                                                                                                                                                                               | Level 1, Form Title/abstract screen |
| 2306 | <b>Michael Mancini.</b> Assessment strategies for substance use disorders.. <i>Social work practice in the addictions</i> .. 2013///. #volume#:49                                                                                                                                                                                                                      | Level 2, Form Full Text Screening   |
| 2308 | <b>Paula P. Schnurr, Matthew J. Friedman, Thomas E. Oxman, Allen J. Dietrich, Mark W. Smith, Brian Shiner, Elizabeth Forshay, Jiang Gui, Veronica Thurston.</b> RESPECT-PTSD: Re-engineering systems for the primary care treatment of PTSD, a randomized controlled trial.. <i>Journal of General Internal Medicine</i> . 2013/01//. 28:32                            | Level 1, Form Title/abstract screen |
| 2309 | <b>Francesco Bartoli, Silvio Scarone, Massimo Clerici.</b> Il rischio di ricovero in pazienti comorbili affetti da disturbi psicotici e da uso di sostanze: Follow-up a 12 anni. = Risk of hospitalization among patients with co-occurring psychotic and substance use disorders: A 12-year follow-up.. <i>Rivista di Psichiatria</i> . 2013/01//Jan-Feb, 2013. 48:51 | Level 1, Form Title/abstract screen |
| 2312 | <b>Sylvia Trent-Adams, Laura W. Cheever.</b> Providing HIV pre-exposure prophylaxis: Lessons learned from the Ryan White HIV/AIDS Program.. <i>American Journal of Preventive Medicine</i> . 2013/01//. 44:S147                                                                                                                                                        | Level 1, Form Title/abstract screen |
| 2313 | <b>Cristina M. Benki.</b> Risks and needs of participants in batterer intervention programs.. <i>Dissertation Abstracts International: Section B: The Sciences and Engineering</i> . 2013///. 74:#pages#                                                                                                                                                               | Level 1, Form Title/abstract screen |
| 2314 | <b>Holly Joy D'Angelo-Scott.</b> An investigation of the impact of a multidisciplinary, collaborative maternity care model in Nova Scotia, Canada.. <i>Dissertation Abstracts International: Section B: The Sciences and Engineering</i> . 2013///. 74:#pages#                                                                                                         | Level 1, Form Title/abstract screen |
| 2315 | <b>Anthony N. Giardina.</b> Factors affecting the therapeutic alliances' impact on substance use disorder treatment outcomes.. <i>Dissertation Abstracts International: Section B: The Sciences and Engineering</i> . 2013///. 74:#pages#                                                                                                                              | Level 2, Form Full Text Screening   |
| 2316 | <b>Emily Jones.</b> Collaborative behavioral and medical care in community health centers: Trends 2000-2007, correlates of capacity, and elements of collaborative care.. <i>Dissertation Abstracts International Section A: Humanities and Social</i>                                                                                                                 | Level 1, Form Title/abstract screen |



|      |                                                                                                                                                                                                                                                                                                                               |                                     |
|------|-------------------------------------------------------------------------------------------------------------------------------------------------------------------------------------------------------------------------------------------------------------------------------------------------------------------------------|-------------------------------------|
|      | <i>Sciences</i> . 2013///. 74:#pages#                                                                                                                                                                                                                                                                                         |                                     |
| 2317 | <b>Sean P. McGowan</b> . Exploring whether the working alliance is a mediator between client resistance, therapist directiveness, and drinking outcomes in an alcohol dependent population.. <i>Dissertation Abstracts International: Section B: The Sciences and Engineering</i> . 2013///. 74:#pages#                       | Level 2, Form Full Text Screening   |
| 2318 | <b>Annette M. McTague</b> . Examining correlations between readiness for treatment and relapse potential: Communicating data to improve client show rate.. <i>Dissertation Abstracts International: Section B: The Sciences and Engineering</i> . 2013///. 73:#pages#                                                         | Level 1, Form Title/abstract screen |
| 2319 | <b>D. Eugene Mead</b> . Becoming a marriage and family therapist: From classroom to consulting room.. <i>#journal#</i> . 2013///. #volume#:#pages#                                                                                                                                                                            | Level 1, Form Title/abstract screen |
| 2320 | <b>Julie A. Nelson</b> . The relationships among shame, working alliance and aftercare attendance to treatment outcomes.. <i>Dissertation Abstracts International: Section B: The Sciences and Engineering</i> . 2013///. 73:#pages#                                                                                          | Level 1, Form Title/abstract screen |
| 2321 | <b>Barbara Jones Warren</b> . Shared decision making: A recovery cultural process.. <i>Journal of Psychosocial Nursing and Mental Health Services</i> . 2012/12//. 50:1                                                                                                                                                       | Level 1, Form Title/abstract screen |
| 2324 | <b>Allison R. Gilbert, Marisa E. Domino, Joseph P. Morrissey, Bradley N. Gaynes</b> . Differential service utilization associated with trauma-informed integrated treatment for women with co-occurring disorders.. <i>Administration and Policy in Mental Health and Mental Health Services Research</i> . 2012/11//. 39:426 | Level 2, Form Full Text Screening   |
| 2325 | <b>Inga Dennhag, Mary Beth Connolly Gibbons, Jacques P. Barber, Robert Gallop, Paul Crits-Christoph</b> . Do supervisors and independent judges agree on evaluations of therapist adherence and competence in the treatment of cocaine dependence?. <i>Psychotherapy Research</i> . 2012/11//. 22:720                         | Level 1, Form Title/abstract screen |
| 2326 | <b>Michael P. Chaney, Michael D. Brubaker</b> . Addiction in LGBTQ communities: Influences, treatment, and prevention.. <i>Journal of LGBT Issues in Counseling</i> . 2012/10//. 6:234                                                                                                                                        | Level 1, Form Title/abstract screen |
| 2327 | <b>Laurie Drabble, Michele J. Eliason</b> . Substance use disorders treatment for sexual minority women.. <i>Journal of LGBT Issues in Counseling</i> . 2012/10//. 6:274                                                                                                                                                      | Level 2, Form Full Text Screening   |
| 2329 | <b>Tytti Artkoski, Pekka Saarnio</b> . Therapist effects in substance abuse treatment: A naturalistic study.. <i>Journal of Substance Use</i> . 2012/10//. 17:456                                                                                                                                                             | Level 2, Form Full Text Screening   |
| 2331 | <b>Patricia Nemeec</b> . Review of The heart and soul of change: Delivering what works in therapy (2nd ed.).. <i>Psychiatric Rehabilitation Journal</i> . 2012/09//. 35:415                                                                                                                                                   | Level 1, Form Title/abstract screen |
| 2332 | <b>Liz Beddoe</b> . Review of Knowledge-in-practice in the caring professions: Multidisciplinary perspectives.. <i>Australian Social Work</i> . 2012/09//. 65:435                                                                                                                                                             | Level 1, Form Title/abstract screen |
| 2333 | <b>Larry Davidson</b> . Use of coercion in recovery-oriented care: Staying vigilant.. <i>Psychiatric Services</i> . 2012/08/01/. 63:834                                                                                                                                                                                       | Level 1, Form Title/abstract screen |
| 2336 | <b>Inga Dennhag, Mary Beth Connolly Gibbons, Jacques P. Barber, Robert Gallop, Paul Crits-Christoph</b> . How many treatment sessions and patients are needed to create a stable score of adherence and competence in the treatment of cocaine dependence?. <i>Psychotherapy Research</i> . 2012/07//. 22:475                 | Level 1, Form Title/abstract screen |

|      |                                                                                                                                                                                                                                                                                                                                                                                                                                                                                                                                      |                                           |
|------|--------------------------------------------------------------------------------------------------------------------------------------------------------------------------------------------------------------------------------------------------------------------------------------------------------------------------------------------------------------------------------------------------------------------------------------------------------------------------------------------------------------------------------------|-------------------------------------------|
| 2337 | <b>Siamia Rashid, Alex Copello, Max Birchwood.</b> Muslim faith healers' views on substance misuse and psychosis.. <i>Mental Health, Religion &amp; Culture</i> . 2012/07//. 15:653                                                                                                                                                                                                                                                                                                                                                  | Level 1, Form<br>Title/abstract<br>screen |
| 2340 | <b>Ambreen Rashid.</b> Review of Human needs and intellectual disabilities: Applications for person centred planning, dual diagnosis and crisis intervention.. <i>Journal of Intellectual Disability Research</i> . 2012/06//. 56:652                                                                                                                                                                                                                                                                                                | Level 1, Form<br>Title/abstract<br>screen |
| 2344 | <b>Marina L. Merrill, Nicole L. Taylor, Alison J. Martin, Lauren A. Maxim, Ryan D'Ambrosio, Roy M. Gabriel, Staci J. Wendt, Danyelle Mannix, Michael E. Wells.</b> A mixed-method exploration of functioning in safe schools/healthy students partnerships.. <i>Evaluation and Program Planning</i> . 2012/05//. 35:280                                                                                                                                                                                                              | Level 1, Form<br>Title/abstract<br>screen |
| 2345 | <b>Anilkrishna B. Thota, Theresa Ann Sipe, Guthrie J. Byard, Carlos S. Zometa, Robert A. Hahn, Lela R. McKnight-Eily, Daniel P. Chapman, Ana F. Abraido-Lanza, Jane L. Pearson, Clinton W. Anderson, Alan J. Gelenberg, Kevin D. Hennessy, Farifteh F. Duffy, Mary E. Vernon-Smiley, Donald E. Jr. Nease, Samantha P. Williams.</b> Collaborative care to improve the management of depressive disorders: A community guide systematic review and meta-analysis.. <i>American Journal of Preventive Medicine</i> . 2012/05//. 42:525 | Level 1, Form<br>Title/abstract<br>screen |
| 2348 | <b>Thomas M. Richardson, Bruce Friedman, Carol Podgorski, Kerry Knox, Susan Fisher, Hua He, Yeates Conwell.</b> Depression and its correlates among older adults accessing aging services.. <i>The American Journal of Geriatric Psychiatry</i> . 2012/04//. 20:346                                                                                                                                                                                                                                                                  | Level 1, Form<br>Title/abstract<br>screen |
| 2350 | <b>Annette Christy, Colleen Clark, Autumn Frei, Sarah Rynearson-Moody.</b> Challenges of diverting veterans to trauma informed care: The heterogeneity of Intercept 2.. <i>Criminal Justice and Behavior</i> . 2012/04//. 39:461                                                                                                                                                                                                                                                                                                     | Level 1, Form<br>Title/abstract<br>screen |
| 2351 | <b>Telsie A. Davis, Julie Ancis.</b> Look to the relationship: A review of African American women substance users' poor treatment retention and working alliance development.. <i>Substance Use &amp; Misuse</i> . 2012/04//. 47:662                                                                                                                                                                                                                                                                                                 | Level 2, Form<br>Full Text<br>Screening   |
| 2355 | <b>Elizabeth M. Yano, Edmund F. Chaney, Duncan G. Campbell, Ruth Klap, Barbara F. Simon, Laura M. Bonner, Andrew B. Lanto, Lisa V. Rubenstein.</b> Yield of practice-based depression screening in VA primary care settings.. <i>Journal of General Internal Medicine</i> . 2012/03//. 27:331                                                                                                                                                                                                                                        | Level 1, Form<br>Title/abstract<br>screen |
| 2357 | <b>Anja Koski-Jännes, Tanja Hirschovits-Gerz, Marjo Pennonen.</b> Population, professional, and client support for different models of managing addictive behaviors.. <i>Substance Use &amp; Misuse</i> . 2012/02//. 47:296                                                                                                                                                                                                                                                                                                          | Level 1, Form<br>Title/abstract<br>screen |
| 2358 | <b>Olivier Taïeb, Sylvie Chevret, Marie Rose Moro, Mitchell G. Weiss, Anne Biadi-Imhof, Aymeric Reyre, Thierry Baubet.</b> Impact of migration on explanatory models of illness and addiction severity in patients with drug dependence in a Paris suburb.. <i>Substance Use &amp; Misuse</i> . 2012/02//. 47:347                                                                                                                                                                                                                    | Level 1, Form<br>Title/abstract<br>screen |
| 2359 | <b>Tammi Vacha-Haase.</b> Clinical practice with older adults.. <i>APA handbook of counseling psychology, Vol. 2: Practice, interventions, and applications</i> .. 2012///. #volume#:497                                                                                                                                                                                                                                                                                                                                             | Level 1, Form<br>Title/abstract<br>screen |
| 2360 | <b>Laura Mufson, Laurie Reider Lewis, Meredith Gunlicks-Stoessel, Jami F. Young.</b> Treatment of adolescent depression with interpersonal psychotherapy.. <i>Casebook of interpersonal psychotherapy</i> .. 2012///. #volume#:203                                                                                                                                                                                                                                                                                                   | Level 1, Form<br>Title/abstract<br>screen |
| 2361 | <b>Shelley Cohen Konrad, Jennifer Morton.</b> If I feel judged by you, I will not trust you: Relational practice with addicted mothers.. <i>Falling through the cracks: Psychodynamic practice with vulnerable and oppressed populations</i> .. 2012///. #volume#:107                                                                                                                                                                                                                                                                | Level 2, Form<br>Full Text<br>Screening   |

|      |                                                                                                                                                                                                                                                                            |                                           |
|------|----------------------------------------------------------------------------------------------------------------------------------------------------------------------------------------------------------------------------------------------------------------------------|-------------------------------------------|
| 2362 | <b>Brian K. Sullivan.</b> The one-stop shop: Collaboration beyond psychology.. <i>Getting better at private practice</i> .. 2012///. #volume#:292                                                                                                                          | Level 1, Form<br>Title/abstract<br>screen |
| 2363 | <b>Julian D. Ford.</b> Posttraumatic stress disorder among youth involved in juvenile justice.. <i>Handbook of juvenile forensic psychology and psychiatry</i> .. 2012///. #volume#:485                                                                                    | Level 1, Form<br>Title/abstract<br>screen |
| 2364 | <b>Mark B. Scholl, A. Scott McGowan, James T. Hansen.</b> Introduction to humanistic perspectives on contemporary counseling issues.. <i>Humanistic perspectives on contemporary counseling issues</i> .. 2012///. #volume#:3                                              | Level 1, Form<br>Title/abstract<br>screen |
| 2365 | <b>Jane E. Myers, Phillip Clarke, Jennifer B. Brown, Denisha A. Champion.</b> Wellness: Theory, research, and applications for counselors.. <i>Humanistic perspectives on contemporary counseling issues</i> .. 2012///. #volume#:17                                       | Level 2, Form<br>Full Text<br>Screening   |
| 2366 | <b>Michael D'Andrea, Judy Daniels.</b> Humanism and multiculturalism.. <i>Humanistic perspectives on contemporary counseling issues</i> .. 2012///. #volume#:45                                                                                                            | Level 1, Form<br>Title/abstract<br>screen |
| 2367 | <b>Mark B. Scholl, Emma Kendrick, Dallas Wilkes, W. Bryce Hagedorn.</b> Humanism and substance abuse counseling.. <i>Humanistic perspectives on contemporary counseling issues</i> .. 2012///. #volume#:85                                                                 | Level 1, Form<br>Title/abstract<br>screen |
| 2368 | <b>Sylvia K. Fisher, Gary M. Blau, Jeffrey M. Poirier.</b> Where do we go from here? Next steps for research, practice, and policy.. <i>Improving emotional and behavioral outcomes for LGBT youth: A guide for professionals</i> .. 2012///. #volume#:267                 | Level 1, Form<br>Title/abstract<br>screen |
| 2369 | <b>Rodger Kessler.</b> An outcome and clinical research focus in an integrated care patient-centered medical home.. <i>Integrated care: Applying theory to practice</i> .. 2012///. #volume#:297                                                                           | Level 1, Form<br>Title/abstract<br>screen |
| 2370 | <b>Frances E. Aboud.</b> Health psychology.. <i>Internationalizing the psychology curriculum in the United States</i> .. 2012///. #volume#:263                                                                                                                             | Level 1, Form<br>Title/abstract<br>screen |
| 2371 | <b>Maree Teeson, Wayne Hall, Louise Mewton, Margaret Grigg.</b> Substance-related disorders.. <i>Mental health in Australia: Collaborative community practice</i> .. 2012///. #volume#:694                                                                                 | Level 1, Form<br>Title/abstract<br>screen |
| 2372 | <b>Mark J. Bates, John C. Bradley, Nazanin Bahraini, Matthew N. Goldenberg.</b> Clinical management of suicide risk with military and veteran personnel.. <i>The American Psychiatric Publishing textbook of suicide assessment and management</i> .. 2012///. #volume#:40 | Level 1, Form<br>Title/abstract<br>screen |
| 2373 | <b>John T. Maltzberger, Joseph B. Stoklosa.</b> Outpatient treatment.. <i>The American Psychiatric Publishing textbook of suicide assessment and management</i> .. 2012///. #volume#:303                                                                                   | Level 1, Form<br>Title/abstract<br>screen |
| 2374 | <b>Daniel J. Fischer, Theresa B. Moyers.</b> Motivational interviewing as a brief psychotherapy.. <i>The art and science of brief psychotherapies: An illustrated guide</i> .. 2012///. #volume#:27                                                                        | Level 1, Form<br>Title/abstract<br>screen |
| 2375 | <b>Lisa Lopez Levers, Elizabeth M. Ventura, Demond E. Bledsoe.</b> Models for trauma intervention: Integrative approaches to therapy.. <i>Trauma counseling: Theories and interventions</i> .. 2012///. #volume#:493                                                       | Level 1, Form<br>Title/abstract<br>screen |
| 2378 | <b>Telsie A. Davis.</b> Removing a barrier to widen the door to recovery: Working alliance development with African American women substance abusers.. <i>Dissertation Abstracts International: Section B: The Sciences and Engineering</i> . 2012///. 73:612              | Level 2, Form<br>Full Text<br>Screening   |

|      |                                                                                                                                                                                                                                                                                                                                        |                                           |
|------|----------------------------------------------------------------------------------------------------------------------------------------------------------------------------------------------------------------------------------------------------------------------------------------------------------------------------------------|-------------------------------------------|
| 2379 | <b>Susan E. Rosenkranz.</b> The contributions of psychological maltreatment and complex PTSD to the prediction of substance use problem severity among youth.. <i>Dissertation Abstracts International: Section B: The Sciences and Engineering</i> . 2012///. 73:631                                                                  | Level 1, Form<br>Title/abstract<br>screen |
| 2380 | <b>Marsha Nneka Sargeant.</b> Psycholinguistic indicators of motivation for substance use behavior change among individuals with serious mental illness.. <i>Dissertation Abstracts International: Section B: The Sciences and Engineering</i> . 2012///. 73:1266                                                                      | Level 1, Form<br>Title/abstract<br>screen |
| 2381 | <b>Nickeisha Clarke.</b> The effects of therapeutic alliance and client readiness to change on cognitive behavior therapy treatment outcomes for a sample of substance and non-substance abusing psychiatric inpatient women.. <i>Dissertation Abstracts International: Section B: The Sciences and Engineering</i> . 2012///. 73:1843 | Level 1, Form<br>Title/abstract<br>screen |
| 2382 | <b>Lindsey W. North.</b> Working alliance and outcome in adolescents and adults in treatment for substance abuse.. <i>Dissertation Abstracts International: Section B: The Sciences and Engineering</i> . 2012///. 73:2513                                                                                                             | Level 2, Form<br>Full Text<br>Screening   |
| 2383 | <b>Claudette Voelkel Fette.</b> School-based occupational therapy: Perspectives on strength-based assessment and providing related interventions for elementary students with mental health needs.. <i>Dissertation Abstracts International: Section B: The Sciences and Engineering</i> . 2012///. 73:3544                            | Level 1, Form<br>Title/abstract<br>screen |
| 2384 | <b>Lindsay C. Sharp.</b> Older adult patient-doctor communication regarding alcohol use: A qualitative study.. <i>Dissertation Abstracts International: Section B: The Sciences and Engineering</i> . 2012///. 72:6707                                                                                                                 | Level 1, Form<br>Title/abstract<br>screen |
| 2385 | <b>Jon M. Houck.</b> The neuroscience of motivational interviewing change talk.. <i>Dissertation Abstracts International: Section B: The Sciences and Engineering</i> . 2012///. 72:7707                                                                                                                                               | Level 1, Form<br>Title/abstract<br>screen |
| 2386 | <b>Patt Denning, Jeannie Little.</b> Practicing harm reduction psychotherapy: An alternative approach to addictions., 2nd ed.. #journal#. 2012///. #volume#: #pages#                                                                                                                                                                   | Level 2, Form<br>Full Text<br>Screening   |
| 2388 | <b>Louise Johns.</b> Review of CBT for psychosis: A symptom-based approach.. <i>Cognitive Behaviour Therapy</i> . 2011/12//. 40:313                                                                                                                                                                                                    | Level 1, Form<br>Title/abstract<br>screen |
| 2389 | <b>Geoffrey M. Curran, Jeffrey Pyne, John C. Fortney, Allen Gifford, Stephen M. Asch, David Rimland, Maria Rodriguez-Barradas, Thomas P. Monson, Amy M. Kilbourne, Hilde Hagedorn, Joseph Atkinson.</b> Development and implementation of collaborative care for depression in HIV clinics.. <i>AIDS Care</i> . 2011/12//. 23:1626     | Level 1, Form<br>Title/abstract<br>screen |
| 2390 | <b>Samantha S. Yard, David Huh, Kevin M. King, Jane M. Simoni.</b> Patient-level moderators of the efficacy of peer support and pager reminder interventions to promote antiretroviral adherence.. <i>AIDS and Behavior</i> . 2011/11//. 15:1596                                                                                       | Level 1, Form<br>Title/abstract<br>screen |
| 2391 | <b>Bernadette Pereira, Gracy Andrew, Sulochana Pednekar, Betty R Kirkwood, Vikram Patel.</b> The integration of the treatment for common mental disorders in primary care: Experiences of health care providers in the MANAS trial in Goa, India.. <i>International Journal of Mental Health Systems</i> . 2011/10/03/. 5: #pages#     | Level 1, Form<br>Title/abstract<br>screen |
| 2395 | <b>Racquel J. Merritt, Mary S. Jackson, Sara M. Bunn, Lashaunda R. Joyner.</b> Substance abuse prevention interventions for pregnant women: A synopsis of a need for collaborative work.. <i>Journal of Human Behavior in the Social Environment</i> . 2011/10//. 21:858                                                               | Level 1, Form<br>Title/abstract<br>screen |

|      |                                                                                                                                                                                                                                                                                                                                                                                         |                                           |
|------|-----------------------------------------------------------------------------------------------------------------------------------------------------------------------------------------------------------------------------------------------------------------------------------------------------------------------------------------------------------------------------------------|-------------------------------------------|
| 2396 | <b>Kathryn Corson, Melanie N. Doak, Lauren Denneson, Megan Crutchfield, Geoffrey Soleck, Kathryn C. Dickinson, Martha S. Gerrity, Steven K. Dobscha.</b> Primary care clinician adherence to guidelines for the management of chronic musculoskeletal pain: Results from the study of the effectiveness of a collaborative approach to pain.. <i>Pain Medicine</i> . 2011/10//. 12:1490 | Level 1, Form<br>Title/abstract<br>screen |
| 2399 | <b>Kathleen Ell, Wayne Katon, Bin Xie, Pey-Jiuan Lee, Suad Kapetanovic, Jeffrey Guterman, Chih-Ping Chou.</b> One-year postcollaborative depression care trial outcomes among predominantly Hispanic diabetes safety net patients.. <i>General Hospital Psychiatry</i> . 2011/09//Sep-Oct, 2011. 33:436                                                                                 | Level 1, Form<br>Title/abstract<br>screen |
| 2401 | <b>Kathryn Sheridan, Wendy L. Haight, Leah Cleeland.</b> The role of grandparents in preventing aggressive and other externalizing behavior problems in children from rural, methamphetamine-involved families.. <i>Children and Youth Services Review</i> . 2011/09//. 33:1583                                                                                                         | Level 1, Form<br>Title/abstract<br>screen |
| 2405 | <b>Ethan S. Rofman.</b> Review of Primary care mental health.. <i>The Journal of Clinical Psychiatry</i> . 2011/07//. 72:1018                                                                                                                                                                                                                                                           | Level 1, Form<br>Title/abstract<br>screen |
| 2407 | <b>Monica Payne, Megan Gething, Alison A. Moore, M. Carrington Reid.</b> Primary care providers' perspectives on psychoactive medication disorders in older adults.. <i>American Journal of Geriatric Pharmacotherapy (AJGP)</i> . 2011/06//. 9:164                                                                                                                                     | Level 1, Form<br>Title/abstract<br>screen |
| 2408 | <b>Paul Crits-Christoph, Jessica L. Hamilton, Sarah Ring-Kurtz, Robert Gallop, Bridget McClure, Agatha Kulaga, John Rotrosen.</b> Program, counselor, and patient variability in the alliance: A multilevel study of the alliance in relation to substance use outcomes.. <i>Journal of Substance Abuse Treatment</i> . 2011/06//. 40:405                                               | Level 2, Form<br>Full Text<br>Screening   |
| 2410 | <b>Elizabeth Evans, M. Douglas Anglin, Darren Urada, Joy Yang.</b> Promising practices for delivery of court-supervised substance abuse treatment: Perspectives from six high-performing California counties operating Proposition 36.. <i>Evaluation and Program Planning</i> . 2011/05//. 34:124                                                                                      | Level 1, Form<br>Title/abstract<br>screen |
| 2413 | <b>Paul Crits-Christoph, Jennifer Johnson, Robert Gallop, Mary Beth Connolly Gibbons, Sarah Ring-Kurtz, Jessica L. Hamilton, Xin Tu.</b> A generalizability theory analysis of group process ratings in the treatment of cocaine dependence.. <i>Psychotherapy Research</i> . 2011/05//. 21:252                                                                                         | Level 1, Form<br>Title/abstract<br>screen |
| 2418 | <b>Branka Agic, Robert E. Mann, Marianne Kobus-Matthews.</b> Alcohol use in seven ethnic communities in Ontario: A qualitative investigation.. <i>Drugs: Education, Prevention &amp; Policy</i> . 2011/04//. 18:116                                                                                                                                                                     | Level 1, Form<br>Title/abstract<br>screen |
| 2419 | <b>Rogério M. Pinto, Aimee N. C. Campbell, Denise A. Hien, Gary Yu, Prakash Gorroochurn.</b> Retention in the National Institute on Drug Abuse Clinical Trials Network Women and Trauma Study: Implications for posttrial implementation.. <i>American Journal of Orthopsychiatry</i> . 2011/04//. 81:211                                                                               | Level 1, Form<br>Title/abstract<br>screen |
| 2421 | <b>Ihsan M. Salloum, Juan E. Mezzich.</b> Outlining the bases of person-centred integrative diagnosis.. <i>Journal of Evaluation in Clinical Practice</i> . 2011/04//. 17:354                                                                                                                                                                                                           | Level 1, Form<br>Title/abstract<br>screen |
| 2422 | <b>Kim J. Masters.</b> 'Ultrashort stays and a focus on recovery': To the editor.. <i>Psychiatric Services</i> . 2011/04//. 62:434                                                                                                                                                                                                                                                      | Level 1, Form<br>Title/abstract<br>screen |
| 2424 | <b>Douglas Zatzick, Frederick Rivara, Gregory Jurkovich, Joan Russo, Sarah Geiss Trusz, Jin Wang, Amy Wagner, Kari Stephens, Chris Dunn, Edwina Uehara, Megan Petrie, Charles Engel, Dimitri Davydow, Wayne Katon.</b>                                                                                                                                                                  | Level 1, Form<br>Title/abstract<br>screen |

|      |                                                                                                                                                                                                                                                                                                                                                                                                                   |                                           |
|------|-------------------------------------------------------------------------------------------------------------------------------------------------------------------------------------------------------------------------------------------------------------------------------------------------------------------------------------------------------------------------------------------------------------------|-------------------------------------------|
|      | Enhancing the population impact of collaborative care interventions: Mixed method development and implementation of stepped care targeting posttraumatic stress disorder and related comorbidities after acute trauma.. <i>General Hospital Psychiatry</i> . 2011/03//Mar-Apr, 2011. 33:123                                                                                                                       |                                           |
| 2426 | <b>Anne Kari Knudsen, Cinzia Brunelli, Stein Kaasa, Giovanni Apolone, Oscar Corli, Mauro Montanari, Robin Fainsinger, Nina Aass, Peter Fayers, Augusto Caraceni, Pål Klepstad.</b> Which variables are associated with pain intensity and treatment response in advanced cancer patients? – implications for a future classification system for cancer pain.. <i>European Journal of Pain</i> . 2011/03//. 15:320 | Level 1, Form<br>Title/abstract<br>screen |
| 2428 | <b>Henny A. Westra, Hal Arkowitz.</b> Introduction.. <i>Cognitive and Behavioral Practice</i> . 2011/02//. 18:1                                                                                                                                                                                                                                                                                                   | Level 1, Form<br>Title/abstract<br>screen |
| 2429 | <b>Charles Nelson, Kate St. Cyr, Margaret Weiser, Shannon Gifford, Jane Gallimore, Andrew Morningstar.</b> Knowledge gained from the Traumatic Brain Injury Screen—Implications for treating Canadian military personnel.. <i>Military Medicine</i> . 2011/02//. 176:156                                                                                                                                          | Level 1, Form<br>Title/abstract<br>screen |
| 2430 | <b>Kathleen Ell, Bin Xie, Suad Kapetanovic, David I. Quinn, Pey-Jiuan Lee, Anjanette Wells, Chih-Ping Chou.</b> One-year follow-up of collaborative depression care for low-income, predominantly Hispanic patients with cancer.. <i>Psychiatric Services</i> . 2011/02//. 62:162                                                                                                                                 | Level 1, Form<br>Title/abstract<br>screen |
| 2431 | <b>Amo Fuhrmann, Bemhard M. Schroer, Renate de Jong-Meyer.</b> Systematic motivational counseling in groups: Promoting therapeutic change through client interaction.. <i>Handbook of motivational counseling: Goal-based approaches to assessment and intervention with addiction and other problems</i> .. 2011//. #volume#:303                                                                                 | Level 1, Form<br>Title/abstract<br>screen |
| 2432 | <b>Michael R. Tilus, Kevin M. McGuinness, Mimi Sa, Earl Sutherland, Bret A. Moore, Vincen Barnes, Johna C. Hartnell, Anthony Tranchita.</b> Collaborative practice with pediatricians within the Indian Health Service: Taking care of frontier children.. <i>Pediatricians and pharmacologically trained psychologists: Practitioner's guide to collaborative treatment</i> .. 2011//. #volume#:95               | Level 1, Form<br>Title/abstract<br>screen |
| 2434 | <b>Betty Vreeland, Anna Marie Toto, Marie Verna, Jill Williams.</b> Cultivating physical health and wellness utilizing a person-centered approach.. <i>Serious mental illness: Person-centered approaches</i> .. 2011//. #volume#:284                                                                                                                                                                             | Level 1, Form<br>Title/abstract<br>screen |
| 2435 | <b>Leon Ginsberg.</b> Editorial note.. <i>Administration in Social Work</i> . 2011/01//. 35:1                                                                                                                                                                                                                                                                                                                     | Level 1, Form<br>Title/abstract<br>screen |
| 2437 | <b>A. L. Roberts, S. E. Gilman, J. Breslau, N. Breslau, K. C. Koenen.</b> Race/ethnic differences in exposure to traumatic events, development of post-traumatic stress disorder, and treatment-seeking for post-traumatic stress disorder in the United States.. <i>Psychological Medicine</i> . 2011/01//. 41:71                                                                                                | Level 1, Form<br>Title/abstract<br>screen |
| 2438 | <b>Laurie Drabble.</b> Advancing collaborative practice between substance abuse treatment and child welfare fields: What helps and hinders the process?. <i>Administration in Social Work</i> . 2011/01//. 35:88                                                                                                                                                                                                  | Level 1, Form<br>Title/abstract<br>screen |
| 2439 | <b>Lisa D . Butler, Filomena M . Critelli, Elaine S. Rinfrette.</b> Trauma-informed care and mental health.. <i>Directions in Psychiatry</i> . 2011//. 31:197                                                                                                                                                                                                                                                     | Level 1, Form<br>Title/abstract<br>screen |
| 2440 | <b>David Menges.</b> The role of therapeutic alliance in individual and couples cognitive-behavioral therapy for women with alcohol dependence.. <i>Dissertation</i>                                                                                                                                                                                                                                              | Level 1, Form<br>Title/abstract           |

|      |                                                                                                                                                                                                                                                                                                                                                                                                      |                                     |
|------|------------------------------------------------------------------------------------------------------------------------------------------------------------------------------------------------------------------------------------------------------------------------------------------------------------------------------------------------------------------------------------------------------|-------------------------------------|
|      | <i>Abstracts International Section A: Humanities and Social Sciences</i> . 2011///. 72:1108                                                                                                                                                                                                                                                                                                          | screen                              |
| 2441 | <b>Harriett Elizabeth Reeh</b> . The relationships between perceived therapeutic alliance, therapist self-disclosure, and dropout expectancy among male substance abuse treatment participants.. <i>Dissertation Abstracts International: Section B: The Sciences and Engineering</i> . 2011///. 72:1150                                                                                             | Level 2, Form Full Text Screening   |
| 2442 | <b>Ashley C. Lyman</b> . Experienced clinicians' perspectives on dual diagnosis: A qualitative investigation.. <i>Dissertation Abstracts International: Section B: The Sciences and Engineering</i> . 2011///. 72:1799                                                                                                                                                                               | Level 1, Form Title/abstract screen |
| 2443 | <b>Allison J. Applebaum</b> . Correlates of neuropsychological functioning and associations with therapeutic alliance in HIV-infected and HIV-uninfected opiate-dependent patients.. <i>Dissertation Abstracts International: Section B: The Sciences and Engineering</i> . 2011///. 72:2430                                                                                                         | Level 1, Form Title/abstract screen |
| 2444 | <b>Marina Lalayants</b> . Multidisciplinary clinical consultation in child protection: Contextual influences and stakeholder perceptions of best practices.. <i>Dissertation Abstracts International Section A: Humanities and Social Sciences</i> . 2011///. 71:3040                                                                                                                                | Level 1, Form Title/abstract screen |
| 2445 | <b>Masha Godkin</b> . A case study of the treatment team approach in addiction.. <i>Dissertation Abstracts International: Section B: The Sciences and Engineering</i> . 2011///. 71:5122                                                                                                                                                                                                             | Level 1, Form Title/abstract screen |
| 2446 | <b>Tracey Cherie Gilbert</b> . Coping, spirituality, motivation to change, and the working alliance: The associations with substance abuse treatment outcomes.. <i>Dissertation Abstracts International: Section B: The Sciences and Engineering</i> . 2011///. 71:5788                                                                                                                              | Level 1, Form Title/abstract screen |
| 2447 | <b>Donna M. Sudak</b> . Combining CBT and medication: An evidence-based approach.. #journal#. 2011///. #volume#:#pages#                                                                                                                                                                                                                                                                              | Level 1, Form Title/abstract screen |
| 2451 | <b>Steve Sussman</b> . Introduction to issue on special populations: Persons, places, and situations.. <i>Evaluation &amp; the Health Professions</i> . 2010/12//. 33:412                                                                                                                                                                                                                            | Level 1, Form Title/abstract screen |
| 2453 | <b>Rowena J. Dolor, Truls Østbye, Pauline Lyna, Cynthia J. Coffman, Stewart C. Alexander, James A. Tulskey, Rebecca J. Namenek Brouwer, Iguehi Esoimeme, Kathryn I. Pollak</b> . What are physicians' and patients' beliefs about diet, weight, exercise, and smoking cessation counseling?. <i>Preventive Medicine: An International Journal Devoted to Practice and Theory</i> . 2010/11//. 51:440 | Level 1, Form Title/abstract screen |
| 2457 | <b>Julie Kipp</b> . Review of Ordinary life therapy: Experiences from a collaborative systemic practice.. <i>Psychosis: Psychological, Social and Integrative Approaches</i> . 2010/10//. 2:261                                                                                                                                                                                                      | Level 1, Form Title/abstract screen |
| 2458 | <b>Alicia L. Picken, Katherine Berry, Nicholas Tarrier, Christine Barrowclough</b> . Traumatic events, posttraumatic stress disorder, attachment style, and working alliance in a sample of people with psychosis.. <i>Journal of Nervous and Mental Disease</i> . 2010/10//. 198:775                                                                                                                | Level 1, Form Title/abstract screen |
| 2459 | <b>Mehrnaz Davoudi, Richard A. Rawson</b> . Screening, brief intervention, and referral to treatment (SBIRT) initiatives in California: Notable trends, challenges, and recommendations.. <i>Journal of Psychoactive Drugs</i> . 2010/09//. Sarc Suppl 6:239                                                                                                                                         | Level 1, Form Title/abstract screen |
| 2464 | <b>Kathleen Ell, María P. Aranda, Bin Xie, Pey-Juan Lee, Chih-Ping Chou</b> . Collaborative depression treatment in older and younger adults with physical illness: Pooled comparative analysis of three randomized clinical trials.. <i>The</i>                                                                                                                                                     | Level 1, Form Title/abstract screen |

|      |                                                                                                                                                                                                                                                                                                         |                                           |
|------|---------------------------------------------------------------------------------------------------------------------------------------------------------------------------------------------------------------------------------------------------------------------------------------------------------|-------------------------------------------|
|      | <i>American Journal of Geriatric Psychiatry</i> . 2010/06//. 18:520                                                                                                                                                                                                                                     |                                           |
| 2466 | <b>Eric Latimer, Olivier Farmer, Anne G. Crocker, Todd Jenkins.</b> Perceived coercion, client-centredness, and positive and negative pressures in an assertive community treatment program: An exploratory study.. <i>Canadian Journal of Community Mental Health</i> . 2010///Spr 2010. 29:35         | Level 1, Form<br>Title/abstract<br>screen |
| 2469 | <b>Steven D. Vannoy, Patricia Arean, Jürgen Unützer.</b> Advantages of using estimated depression-free days for evaluating treatment efficacy.. <i>Psychiatric Services</i> . 2010/02//. 61:160                                                                                                         | Level 1, Form<br>Title/abstract<br>screen |
| 2470 | <b>Niklaus Stulz, Robert Gallop, Wolfgang Lutz, Glenda L. Wrenn, Paul Crits-Christoph.</b> Examining differential effects of psychosocial treatments for cocaine dependence: An application of latent trajectory analyses.. <i>Drug and Alcohol Dependence</i> . 2010/01/15/. 106:164                   | Level 1, Form<br>Title/abstract<br>screen |
| 2471 | <b>Meredith L. Gunlicks-Stoessel, Laura Mufson.</b> Interpersonal psychotherapy for depressed adolescents.. <i>Dulcan's textbook of child and adolescent psychiatry</i> .. 2010///. #volume#:887                                                                                                        | Level 1, Form<br>Title/abstract<br>screen |
| 2472 | <b>Paul Nagy.</b> Motivational interviewing.. <i>Dulcan's textbook of child and adolescent psychiatry</i> .. 2010///. #volume#:915                                                                                                                                                                      | Level 1, Form<br>Title/abstract<br>screen |
| 2473 | <b>Leanne Hides, Steve Carroll, Dan I. Lubman, Amanda Baker.</b> Brief motivational interviewing for depression and anxiety.. <i>Oxford guide to low intensity CBT interventions</i> .. 2010///. #volume#:177                                                                                           | Level 1, Form<br>Title/abstract<br>screen |
| 2474 | <b>Gary M. Blau, Shannon CrossBear, Coretta Mallery.</b> Adaptation and innovation.. <i>The leadership equation: Strategies for individuals who are champions for children, youth, and families</i> .. 2010///. #volume#:141                                                                            | Level 1, Form<br>Title/abstract<br>screen |
| 2475 | <b>Catherine Eubanks-Carter, J. Christopher Muran, Jeremy D. Safran.</b> Alliance ruptures and resolution.. <i>The therapeutic alliance: An evidence-based guide to practice</i> .. 2010///. #volume#:74                                                                                                | Level 1, Form<br>Title/abstract<br>screen |
| 2476 | <b>Lorna Smith Benjamin, Kenneth L. Critchfield.</b> An interpersonal perspective on therapy alliances and techniques.. <i>The therapeutic alliance: An evidence-based guide to practice</i> .. 2010///. #volume#:123                                                                                   | Level 1, Form<br>Title/abstract<br>screen |
| 2479 | <b>Paul Branscum, Manoj Sharma.</b> A review of motivational interviewing-based interventions targeting problematic drinking among college students.. <i>Alcoholism Treatment Quarterly</i> . 2010/01//. 28:63                                                                                          | Level 1, Form<br>Title/abstract<br>screen |
| 2482 | <b>Brian D. Roland.</b> The impact of counselor recovery status, disclosure, education, and experience on the working alliance in the treatment of substance use disorders.. <i>Dissertation Abstracts International Section A: Humanities and Social Sciences</i> . 2010///. 71:1798                   | Level 1, Form<br>Title/abstract<br>screen |
| 2483 | <b>Margaret M. Murray.</b> Opportunistic interventions to treat alcohol problems in emergency department settings: Is there a role for social work and other non-physician health professions?. <i>Dissertation Abstracts International: Section B: The Sciences and Engineering</i> . 2010///. 71:3588 | Level 1, Form<br>Title/abstract<br>screen |
| 2484 | <b>Nazli Seewer.</b> The effects of adult attachment styles on treatment outcome of methamphetamine abusers.. <i>Dissertation Abstracts International: Section B: The Sciences and Engineering</i> . 2010///. 70:5846                                                                                   | Level 1, Form<br>Title/abstract<br>screen |
| 2485 | <b>Robert A. DiTomasso, Barbara A. Golden, Harry Morris.</b> Handbook of cognitive behavioral approaches in primary care.. #journal#. 2010///. #volume#: #pages#                                                                                                                                        | Level 1, Form<br>Title/abstract<br>screen |
| 2486 | <b>Katherine van Wormer, Bruce A. Thyer.</b> Evidence-based practice in the field                                                                                                                                                                                                                       | Level 2, Form<br>Full Text                |



|      |                                                                                                                                                                                                                                                                                |                                           |
|------|--------------------------------------------------------------------------------------------------------------------------------------------------------------------------------------------------------------------------------------------------------------------------------|-------------------------------------------|
|      | of substance abuse: A book of readings.. #journal#. 2010///. #volume#: #pages#                                                                                                                                                                                                 | Screening                                 |
| 2487 | <b>Neeraj K. Arora, Richard L. Jr. Street, Ronald M. Epstein, Phyllis N. Butow.</b> Facilitating patient-centered cancer communication: A road map.. <i>Patient Education and Counseling</i> . 2009/12//. 77:319                                                               | Level 1, Form<br>Title/abstract<br>screen |
| 2488 | <b>Henri Gomez.</b> La fonction soignante en alcoologie. = Healthcare function in alcohol rehabilitation.. <i>Alcoologie et Addictologie</i> . 2009/12//. 31:337                                                                                                               | Level 1, Form<br>Title/abstract<br>screen |
| 2491 | <b>Margaret Pereyra, Lisa R. Metsch, Lauren Gooden.</b> HIV-positive patients' discussion of oral health with their HIV primary care providers in Miami, Florida.. <i>AIDS Care</i> . 2009/12//. 21:1578                                                                       | Level 1, Form<br>Title/abstract<br>screen |
| 2492 | <b>Domin Chan, Allen D. Cheadle, Gayle Reiber, Jürgen Unützer, Edmund F. Chaney.</b> Health care utilization and its costs for depressed veterans with and without comorbid PTSD symptoms.. <i>Psychiatric Services</i> . 2009/12//. 60:1612                                   | Level 1, Form<br>Title/abstract<br>screen |
| 2493 | <b>Jean Sandra Adams, Sandra Steele, Alyson McGregor Kettles, Helen Walker, Ian Brown, Mick Collins, Susan Sookoo, Phil Woods.</b> Experience of collaborative research practice in forensic mental health.. <i>The British Journal of Forensic Practice</i> . 2009/11//. 11:4 | Level 1, Form<br>Title/abstract<br>screen |
| 2494 | <b>Michael R. Clark.</b> Psychiatry and chronic pain: Examining the interface and designing a structure for a patient-center approach to treatment.. <i>European Journal of Pain Supplements</i> . 2009/11//. 3:95                                                             | Level 1, Form<br>Title/abstract<br>screen |
| 2495 | <b>Christopher C. Wagner, Karen S. Ingersoll.</b> Beyond behavior: Eliciting broader change with motivational interviewing.. <i>Journal of Clinical Psychology</i> . 2009/11//. 65:1180                                                                                        | Level 1, Form<br>Title/abstract<br>screen |
| 2496 | <b>Jeffrey A. Buck.</b> Recent changes in Medicaid policy and their possible effects on mental health services.. <i>Psychiatric Services</i> . 2009/11//. 60:1504                                                                                                              | Level 1, Form<br>Title/abstract<br>screen |
| 2498 | <b>Leigh Gemmell, Carlo C. DiClemente.</b> Styles of physician advice about smoking cessation in college students.. <i>Journal of American College Health</i> . 2009/09//Sep-Oct, 2009. 58:113                                                                                 | Level 1, Form<br>Title/abstract<br>screen |
| 2499 | <b>Michael J. Silverman.</b> The effect of lyric analysis on treatment eagerness and working alliance in consumers who are in detoxification: A randomized clinical effectiveness study.. <i>Music Therapy Perspectives</i> . 2009/09//. 27:115                                | Level 1, Form<br>Title/abstract<br>screen |
| 2500 | <b>William R. Miller, Gary S. Rose.</b> Toward a theory of motivational interviewing.. <i>American Psychologist</i> . 2009/09//. 64:527                                                                                                                                        | Level 1, Form<br>Title/abstract<br>screen |
| 2501 | <b>Steve J. Allsop, Clare F. Stevens.</b> Evidence-based practice or imperfect seduction? Developing capacity to respond effectively to drug-related problems.. <i>Drug and Alcohol Review</i> . 2009/09//. 28:541                                                             | Level 1, Form<br>Title/abstract<br>screen |
| 2503 | <b>Thomas O'Hare, Margaret Sherrer.</b> Effects of clinic staff support on psychosocial well-being and PTSD symptom severity in clients with severe mental illnesses.. <i>Best Practices in Mental Health: An International Journal</i> . 2009/07//. 5:1                       | Level 1, Form<br>Title/abstract<br>screen |
| 2505 | <b>Joan Mitchell, Judith Belle Brown, Carrie Smith.</b> Interprofessional education: A nurse practitioner impacts family medicine residents' smoking cessation counselling experiences.. <i>Journal of Interprofessional Care</i> . 2009/07//. 23:401                          | Level 1, Form<br>Title/abstract<br>screen |
| 2506 | <b>Nevin J. Harper.</b> The relationship of therapeutic alliance to outcome in wilderness treatment.. <i>Journal of Adventure Education and Outdoor Learning</i> .                                                                                                             | Level 1, Form<br>Title/abstract           |

|      |                                                                                                                                                                                                                                                                                                                                                     |                                     |
|------|-----------------------------------------------------------------------------------------------------------------------------------------------------------------------------------------------------------------------------------------------------------------------------------------------------------------------------------------------------|-------------------------------------|
|      | 2009/06//. 9:45                                                                                                                                                                                                                                                                                                                                     | screen                              |
| 2507 | <b>Martin C. Wesley, Neresa B. Minatrea, Joshua C. Watson.</b> Animal-assisted therapy in the treatment of substance dependence.. <i>Anthrozoös</i> . 2009/06//. 22:137                                                                                                                                                                             | Level 2, Form Full Text Screening   |
| 2509 | <b>Judith K. Ockene, George W. Reed, Sarah Reiff-Hekking.</b> Brief patient-centered clinician-delivered counseling for high-risk drinking: 4-year results.. <i>Annals of Behavioral Medicine</i> . 2009/06//. 37:335                                                                                                                               | Level 2, Form Full Text Screening   |
| 2510 | <b>Ora Nakash, Sarah Dargouth, Vanessa Oddo, Shan Gao, Margarita Alegría.</b> Patient initiation of information: Exploring its role during the mental health intake visit.. <i>Patient Education and Counseling</i> . 2009/05//. 75:220                                                                                                             | Level 1, Form Title/abstract screen |
| 2511 | <b>J. Law, C. Plunkett, J. Taylor, M. Gunning.</b> Developing policy in the provision of parenting programmes: Integrating a review of reviews with the perspectives of both parents and professionals.. <i>Child: Care, Health and Development</i> . 2009/05//. 35:302                                                                             | Level 1, Form Title/abstract screen |
| 2517 | <b>Wadih Maalouf, Cynthia L. Arfken.</b> Guest editors' introduction: Assessing the problem of substance abuse in the Arab world.. <i>Journal of Muslim Mental Health</i> . 2009/03//. 4:5                                                                                                                                                          | Level 1, Form Title/abstract screen |
| 2518 | <b>Chuan-Fen Liu, Cory Bolkan, Domin Chan, Elizabeth M. Yano, Lisa V. Rubenstein, Edmund F. Chaney.</b> Dual use of VA and non-VA services among primary care patients with depression.. <i>Journal of General Internal Medicine</i> . 2009/03//. 24:305                                                                                            | Level 1, Form Title/abstract screen |
| 2519 | <b>Marie Borum, Mary Reyes, Huy Nguyen.</b> Providing counseling on alcohol use for patients with liver disease: Another missed opportunity.. <i>Patient Education and Counseling</i> . 2009/02//. 74:277                                                                                                                                           | Level 1, Form Title/abstract screen |
| 2520 | <b>Rudolf H. Moos.</b> Addictive disorders in context: Principles and puzzles of effective treatment and recovery.. <i>Addictive behaviors: New readings on etiology, prevention, and treatment</i> .. 2009///. #volume#:537                                                                                                                        | Level 1, Form Title/abstract screen |
| 2521 | <b>Virginia Hill Rice.</b> Monitoring the tobacco epidemic with national, regional, and international databases and systematic reviews: Evidence for nursing research and clinical decision making.. <i>Annual review of nursing research, 2009: Advancing nursing science in tobacco control</i> .. 2009///. 27:91                                 | Level 1, Form Title/abstract screen |
| 2522 | <b>Eric R. Levensky, Brian C. Kersh, Lavina L. Cavasos, J. Annette Brooks.</b> Motivational interviewing.. <i>General principles and empirically supported techniques of cognitive behavior therapy</i> .. 2009///. #volume#:455                                                                                                                    | Level 1, Form Title/abstract screen |
| 2523 | <b>Peter H. Musser, Joshua N. Semiatin, Casey T. Taft, Christopher M. Murphy.</b> Motivational interviewing as a pregroup intervention for partner-violent men.. <i>Motivational interviewing and stages of change in intimate partner violence</i> .. 2009///. #volume#:61                                                                         | Level 1, Form Title/abstract screen |
| 2524 | <b>James R. McKay.</b> Other developments in disease management for substance use disorders.. <i>Treating substance use disorders with adaptive continuing care</i> .. 2009///. #volume#:191                                                                                                                                                        | Level 2, Form Full Text Screening   |
| 2528 | <b>Glenn Roberts.</b> Review of Principles and practice of psychiatric rehabilitation: An empirical approach.. <i>The British Journal of Psychiatry</i> . 2009/01//. 194:93                                                                                                                                                                         | Level 1, Form Title/abstract screen |
| 2530 | <b>Kathleen Ell, Wayne Katon, Leopoldo J. Cabassa, Bin Xie, Pey-Jiuan Lee, Suad Kapetanovic, Jeffry Guterman.</b> Depression and diabetes among low-income Hispanics: Design elements of a socio-culturally adapted collaborative care model randomized controlled trial.. <i>International Journal of Psychiatry in Medicine</i> . 2009///. 39:113 | Level 1, Form Title/abstract screen |

|      |                                                                                                                                                                                                                                                                                                                                                    |                                           |
|------|----------------------------------------------------------------------------------------------------------------------------------------------------------------------------------------------------------------------------------------------------------------------------------------------------------------------------------------------------|-------------------------------------------|
| 2531 | <b>Larry F. Forthun, Marilyn J. Montgomery.</b> Profiles of adolescent identity development: Response to an intervention for alcohol/other drug problems.. <i>Alcoholism Treatment Quarterly</i> . 2009///. 27:132                                                                                                                                 | Level 1, Form<br>Title/abstract<br>screen |
| 2532 | <b>Ellen T. Bartley.</b> Family stability, social support and working alliance with a clinical case manager as predictors of exits from homelessness among the mentally ill.. <i>Dissertation Abstracts International Section A: Humanities and Social Sciences</i> . 2009///. 70:688                                                              | Level 1, Form<br>Title/abstract<br>screen |
| 2533 | <b>Nyasanu A. Barbee.</b> The clinical implications of racial differences and inpatient psychological outcome in a sample of veterans.. <i>Dissertation Abstracts International: Section B: The Sciences and Engineering</i> . 2009///. 69:6399                                                                                                    | Level 1, Form<br>Title/abstract<br>screen |
| 2534 | <b>Peter Berzins.</b> Therapeutic alliance as a predictor of psychotherapy process and outcome: The role of expert versus novice raters.. <i>Dissertation Abstracts International: Section B: The Sciences and Engineering</i> . 2009///. 69:7129                                                                                                  | Level 1, Form<br>Title/abstract<br>screen |
| 2535 | <b>Jennifer Fende Guajardo.</b> The effects of pretreatment preparation with clients in a substance abuse treatment program.. <i>Dissertation Abstracts International: Section B: The Sciences and Engineering</i> . 2009///. 69:7810                                                                                                              | Level 1, Form<br>Title/abstract<br>screen |
| 2536 | <b>Ricky Greenwald.</b> Treating problem behaviors: A trauma-informed approach.. #journal#. 2009///. #volume#:#pages#                                                                                                                                                                                                                              | Level 1, Form<br>Title/abstract<br>screen |
| 2537 | <b>Linda Frisman, Michael Prendergast, Hsiu-Ju Lin, Eleni Rodis, Lisa Greenwell.</b> Applying classification and regression tree analysis to identify prisoners with high HIV risk behaviors.. <i>Journal of Psychoactive Drugs</i> . 2008/12//. 40:447                                                                                            | Level 1, Form<br>Title/abstract<br>screen |
| 2540 | <b>Vivian B. Brown, Lisa A. Melchior.</b> Women with co-occurring disorders (COD): Treatment settings and service needs.. <i>Journal of Psychoactive Drugs</i> . 2008/11//. Sarc Suppl 5:365                                                                                                                                                       | Level 2, Form<br>Full Text<br>Screening   |
| 2542 | <b>John W. Jr. Williams, J. Sloan Manning.</b> 'Collaborative mental health and primary care for bipolar disorder': Erratum.. <i>Journal of Psychiatric Practice</i> . 2008/11//. 14:411                                                                                                                                                           | Level 1, Form<br>Title/abstract<br>screen |
| 2543 | <b>Rose C. Maly, Judith A. Stein, Yoshiko Umezawa, Barbara Leake, M. Douglas Anglin.</b> Racial/ethnic differences in breast cancer outcomes among older patients: Effects of physician communication and patient empowerment.. <i>Health Psychology</i> . 2008/11//. 27:728                                                                       | Level 1, Form<br>Title/abstract<br>screen |
| 2550 | <b>Ashley Christiani, Angela L. Hudson, Adeline Nyamathi, Malaika Mutere, Jeffrey Sweat.</b> Attitudes of homeless and drug-using youth regarding barriers and facilitators in delivery of quality and culturally sensitive health care.. <i>Journal of Child and Adolescent Psychiatric Nursing</i> . 2008/08//. 21:154                           | Level 1, Form<br>Title/abstract<br>screen |
| 2552 | <b>Heather Liszka Rose, Peter M. Miller, Lynne S. Nemeth, Ruth G. Jenkins, Paul J. Nietert, Andrea M. Wessell, Steven Ornstein.</b> Alcohol screening and brief counseling in a primary care hypertensive population: A quality improvement intervention.. <i>Addiction</i> . 2008/08//. 103:1271                                                  | Level 1, Form<br>Title/abstract<br>screen |
| 2553 | <b>Carol E. Blixen, Noah J. Webster, Andrew J. Hund, Adam T. Perzynski, Stephanie W. Kanuch, Eleanor Palo Stoller, Richard A. McCormick, Neal V. Dawson.</b> Communicating about alcohol consumption to nonharmful drinkers with hepatitis C: Patient and provider perspectives.. <i>Journal of General Internal Medicine</i> . 2008/08//. 23:1290 | Level 1, Form<br>Title/abstract<br>screen |
| 2554 | <b>Marja Humphrey.</b> Review of Collaborative treatment of traumatized children and teens: The trauma systems therapy approach.. <i>The Family Journal</i> . 2008/07//. 16:275                                                                                                                                                                    | Level 1, Form<br>Title/abstract<br>screen |

|      |                                                                                                                                                                                                                                                                                                            |                                           |
|------|------------------------------------------------------------------------------------------------------------------------------------------------------------------------------------------------------------------------------------------------------------------------------------------------------------|-------------------------------------------|
| 2557 | <b>Paul Crits-Christoph, Mary Beth Connolly Gibbons, Robert Gallop, Sarah Ring-Kurtz, Jacques P. Barber, Matthew Worley, Julie Present, Bridget Hearon.</b> Supportive-expressive psychodynamic therapy for cocaine dependence: A closer look.. <i>Psychoanalytic Psychology</i> . 2008/07//. 25:483       | Level 1, Form<br>Title/abstract<br>screen |
| 2559 | <b>John Greist.</b> A promising debut for computerized therapies.. <i>The American Journal of Psychiatry</i> . 2008/07//. 165:793                                                                                                                                                                          | Level 1, Form<br>Title/abstract<br>screen |
| 2563 | <b>Constance H. Fung, Claude M. Setodji, Fuan-Yue Kung, Joan Keeseey, Steven M. Asch, John Adams, Elizabeth A. McGlynn.</b> The relationship between multimorbidity and patients' ratings of communication.. <i>Journal of General Internal Medicine</i> . 2008/06//. 23:788                               | Level 1, Form<br>Title/abstract<br>screen |
| 2565 | <b>Bauke Koekkoek, John G. Gunderson, Ad Kaasenbrood, Thomas G. Gutheil.</b> Chronic suicidality in a physician: An alliance yet to become therapeutic.. <i>Harvard Review of Psychiatry</i> . 2008/05//. 16:195                                                                                           | Level 1, Form<br>Title/abstract<br>screen |
| 2567 | <b>Stian Biong, Bengt Karlsson, Tommy Svensson.</b> Metaphors of a shifting sense of self in men recovering from substance abuse and suicidal behavior.. <i>Journal of Psychosocial Nursing and Mental Health Services</i> . 2008/04//. 46:35                                                              | Level 1, Form<br>Title/abstract<br>screen |
| 2568 | <b>John E. Zeber, Laurel A. Copeland, Chester B. Good, Michael J. Fine, Mark S. Bauer, Amy M. Kilbourne.</b> Therapeutic alliance perceptions and medication adherence in patients with bipolar disorder.. <i>Journal of Affective Disorders</i> . 2008/04//. 107:53                                       | Level 1, Form<br>Title/abstract<br>screen |
| 2569 | <b>Jennifer Wisdom, Roy Gabriel, Eldon Edmundson, Sarann Bielavitz, Joe Hromco.</b> Challenges substance abuse treatment agencies faced in adoption of computer-based technology to improve assessment.. <i>The Journal of Behavioral Health Services &amp; Research</i> . 2008/04//. 35:158               | Level 1, Form<br>Title/abstract<br>screen |
| 2572 | <b>Janie Sheridan, Felicity Goodyear-Smith, Rachael Butler, Amanda Wheeler, Annette Gohns.</b> Barriers to, and incentives for, the transfer of opioid-dependent people on methadone maintenance treatment from secondary care to primary health care.. <i>Drug and Alcohol Review</i> . 2008/03//. 27:178 | Level 1, Form<br>Title/abstract<br>screen |
| 2573 | <b>Brenda D. Smith, Cristina Mogro-Wilson.</b> Inter-agency collaboration: Policy and practice in child welfare and substance abuse treatment.. <i>Administration in Social Work</i> . 2008/02//. 32:5                                                                                                     | Level 1, Form<br>Title/abstract<br>screen |
| 2575 | <b>Cory F. Newman.</b> Substance use disorders.. <i>Adapting cognitive therapy for depression: Managing complexity and comorbidity</i> .. 2008///. #volume#:233                                                                                                                                            | Level 1, Form<br>Title/abstract<br>screen |
| 2577 | <b>Rodger Kessler, Dale Stafford.</b> Introduction.. <i>Collaborative medicine case studies: Evidence in practice</i> .. 2008///. #volume#:3                                                                                                                                                               | Level 1, Form<br>Title/abstract<br>screen |
| 2578 | <b>Rodger Kessler, Dale Stafford.</b> Primary care is the de facto mental health system.. <i>Collaborative medicine case studies: Evidence in practice</i> .. 2008///. #volume#:9                                                                                                                          | Level 1, Form<br>Title/abstract<br>screen |
| 2579 | <b>Rodger Kessler.</b> How I learned about integrated care by failing miserably: The deadly sins of integration.. <i>Collaborative medicine case studies: Evidence in practice</i> .. 2008///. #volume#:39                                                                                                 | Level 1, Form<br>Title/abstract<br>screen |
| 2580 | <b>Parinda Khatri, Gregg Perry, Febe Wallace.</b> Walking the tightrope without a net: Integrated care for the patient with diabetes, cardiovascular disease, and bipolar disorder...And no insurance.. <i>Collaborative medicine case studies: Evidence in practice</i> .. 2008///. #volume#:309          | Level 1, Form<br>Title/abstract<br>screen |
| 2581 | <b>Shelly A. Wiechelt, Wendy Lutz, Nancy J. Smyth, Charles Syms.</b> Integrating                                                                                                                                                                                                                           | Level 1, Form                             |

|      |                                                                                                                                                                                                                                                                                                                                                                                                                                                                       |                                     |
|------|-----------------------------------------------------------------------------------------------------------------------------------------------------------------------------------------------------------------------------------------------------------------------------------------------------------------------------------------------------------------------------------------------------------------------------------------------------------------------|-------------------------------------|
|      | research and practice: A collaborative model for addressing trauma and addiction.. <i>Stress, trauma and substance use</i> .. 2008///. #volume#:101                                                                                                                                                                                                                                                                                                                   | Title/abstract screen               |
| 2582 | <b>David W. Brook.</b> Group therapy.. <i>The American Psychiatric Publishing textbook of substance abuse treatment</i> .. 2008///. #volume#:413                                                                                                                                                                                                                                                                                                                      | Level 1, Form Title/abstract screen |
| 2583 | <b>Bonita M. Veysey.</b> Mental health, substance abuse, and trauma.. <i>Treating the juvenile offender</i> .. 2008///. #volume#:210                                                                                                                                                                                                                                                                                                                                  | Level 1, Form Title/abstract screen |
| 2584 | <b>Stanley Sacks, Karen McKendrick, JoAnn Y. Sacks, Steven Banks, Michael Harle.</b> Enhanced outpatient treatment for co-occurring disorders: Main outcomes.. <i>Journal of Substance Abuse Treatment</i> . 2008/01//. 34:48                                                                                                                                                                                                                                         | Level 1, Form Title/abstract screen |
| 2585 | <b>Maite P. Mena, Victoria B. Mitrani, Joan A. Muir, Daniel A. Santisteban.</b> Extended parent-child separations: Impact on substance-abusing Hispanic adolescents.. <i>Journal for Specialists in Pediatric Nursing</i> . 2008/01//. 13:50                                                                                                                                                                                                                          | Level 1, Form Title/abstract screen |
| 2587 | <b>Jo Brocato, Eric F. Wagner.</b> Predictors of retention in an alternative-to-prison substance abuse treatment program.. <i>Criminal Justice and Behavior</i> . 2008/01//. 35:99                                                                                                                                                                                                                                                                                    | Level 1, Form Title/abstract screen |
| 2589 | <b>Diana Marie Hess.</b> An investigation of the counseling needs of adult female Mexican Americans with low income status: A modified Delphi study.. <i>Dissertation Abstracts International Section A: Humanities and Social Sciences</i> . 2008///. 69:1283                                                                                                                                                                                                        | Level 1, Form Title/abstract screen |
| 2590 | <b>Sarah Watson Feldstein.</b> Motivational interviewing with late-adolescent/college underage drinkers: An investigation of therapeutic alliance.. <i>Dissertation Abstracts International: Section B: The Sciences and Engineering</i> . 2008///. 68:4821                                                                                                                                                                                                           | Level 1, Form Title/abstract screen |
| 2591 | <b>Elissa Mccarthy.</b> Role of the case management relationship in helping homeless mothers with addictive disorders.. <i>Dissertation Abstracts International: Section B: The Sciences and Engineering</i> . 2008///. 68:4834                                                                                                                                                                                                                                       | Level 2, Form Full Text Screening   |
| 2592 | <b>Bradley Roger Brummett.</b> Attachment style, early maladaptive schemas, coping self-efficacy, therapy alliance and their influence on addiction severity in methadone-maintenance treatment.. <i>Dissertation Abstracts International: Section B: The Sciences and Engineering</i> . 2008///. 68:6952                                                                                                                                                             | Level 1, Form Title/abstract screen |
| 2593 | <b>Stephen Rollnick, William R. Miller, Christopher C. Butler.</b> Motivational interviewing in health care: Helping patients change behavior.. #journal#. 2008///. #volume#:#pages#                                                                                                                                                                                                                                                                                  | Level 1, Form Title/abstract screen |
| 2594 | <b>Kenneth W. Wanberg, Harvey B. Milkman.</b> Criminal conduct and substance abuse treatment: Strategies for self-improvement and change, pathways to responsible living: The provider's guide., 2nd ed.. #journal#. 2008///. #volume#:#pages#                                                                                                                                                                                                                        | Level 1, Form Title/abstract screen |
| 2595 | <b>James L. Levenson.</b> Psychosomatic medicine: Future tasks and priorities for the new psychiatric subspecialty.. <i>Revista Brasileira de Psiquiatria</i> . 2007/12//. 29:301                                                                                                                                                                                                                                                                                     | Level 1, Form Title/abstract screen |
| 2596 | <b>Robert Forman, Paul Crits-Christoph, Övgü Kaynak, Matt Worley, Donald A. Hantula, Agatha Kulaga, John Rotrosen, Melissa Chu, Robert Gallop, Jennifer Potter, Patrice Muchowski, Kirk Brower, Stephen Strobbe, Kathy Magruder, A'Delle H. Chellis, Tad Clodfelter, Margaret Cawley.</b> A feasibility study of a web-based performance improvement system for substance abuse treatment providers.. <i>Journal of Substance Abuse Treatment</i> . 2007/12//. 33:363 | Level 1, Form Title/abstract screen |

|      |                                                                                                                                                                                                                                                                                                                                                       |                                           |
|------|-------------------------------------------------------------------------------------------------------------------------------------------------------------------------------------------------------------------------------------------------------------------------------------------------------------------------------------------------------|-------------------------------------------|
| 2599 | <b>Georgiana Shick Tryon, Sasha Collins Blackwell, Elizabeth Felleman Hammel.</b> A meta-analytic examination of client-therapist perspectives of the working alliance.. <i>Psychotherapy Research</i> . 2007/11//. 17:629                                                                                                                            | Level 1, Form<br>Title/abstract<br>screen |
| 2600 | <b>Damon Lipinski, James P. Whelan, Andrew W. Meyers.</b> Treatment of pathological gambling using a guided self-change approach.. <i>Clinical Case Studies</i> . 2007/10//. 6:394                                                                                                                                                                    | Level 1, Form<br>Title/abstract<br>screen |
| 2604 | <b>Vikram Patel, Ricardo Araya, Sudipto Chatterjee, Dan Chisholm, Alex Cohen, Mary De Silva, C. Hosman, Hugh McGuire, Graciela Rojas, Mark van Ommeren.</b> Treatment and prevention of mental disorders in low-income and middle-income countries.. <i>The Lancet</i> . 2007/09//. 370:991                                                           | Level 1, Form<br>Title/abstract<br>screen |
| 2606 | <b>Mona M. Shattell, Sharon S. Starr, Sandra P. Thomas.</b> 'Take my hand, help me out': Mental health service recipients' experience of the therapeutic relationship.. <i>International Journal of Mental Health Nursing</i> . 2007/08//. 16:274                                                                                                     | Level 1, Form<br>Title/abstract<br>screen |
| 2609 | <b>Carole Schauer, Anita Everett, Paolo del Vecchio, Leigh Anderson.</b> Promoting the value and practice of shared decision-making in mental health care.. <i>Psychiatric Rehabilitation Journal</i> . 2007///Sum 2007. 31:54                                                                                                                        | Level 1, Form<br>Title/abstract<br>screen |
| 2610 | <b>Duncan G. Campbell, Bradford L. Felker, Chuan-Fen Liu, Elizabeth M. Yano, JoAnn E. Kirchner, Domin Chan, Lisa V. Rubenstein, Edmund F. Chaney.</b> Prevalence of depression-PTSD comorbidity: Implications for clinical practice guidelines and primary care-based interventions.. <i>Journal of General Internal Medicine</i> . 2007/06//. 22:711 | Level 1, Form<br>Title/abstract<br>screen |
| 2613 | <b>Brenda D. Smith, Cristina Mogro-Wilson.</b> Multi-level influences on the practice of inter-agency collaboration in child welfare and substance abuse treatment.. <i>Children and Youth Services Review</i> . 2007/05//. 29:545                                                                                                                    | Level 1, Form<br>Title/abstract<br>screen |
| 2614 | <b>A. Kathryn Power, Paolo del Vecchio.</b> Consumer-directed behavioral health care.. <i>Psychiatric Services</i> . 2007/05//. 58:714                                                                                                                                                                                                                | Level 1, Form<br>Title/abstract<br>screen |
| 2618 | <b>Eunice C. Wong, Larry E. Beutler, Nolan W. Zane.</b> Using mediators and moderators to test assumptions underlying culturally sensitive therapies: An exploratory example.. <i>Cultural Diversity and Ethnic Minority Psychology</i> . 2007/04//. 13:169                                                                                           | Level 1, Form<br>Title/abstract<br>screen |
| 2621 | <b>Michael Münchow.</b> Nej/ja, tak! Frustration og gratifikation i misbrugsbehandling. = No/yes please! Frustration and gratification in treatment of addictions.. <i>Matrix: Nordisk Tidsskrift for Psykoterapi</i> . 2007/03//. 24:31                                                                                                              | Level 1, Form<br>Title/abstract<br>screen |
| 2624 | <b>Paul Crits-Christoph, Mary Beth Connolly Gibbons, Jacques P. Barber, Bojun Hu, Bridget Hearon, Matt Worley, Robert Gallop.</b> Predictors of sustained abstinence during psychosocial treatments for cocaine dependence.. <i>Psychotherapy Research</i> . 2007/03//. 17:240                                                                        | Level 1, Form<br>Title/abstract<br>screen |
| 2626 | <b>Robert J. Gallop, Paul Crits-Christoph, Thomas R. Ten Have, Jacques P. Barber, Arlene Frank, Margaret L. Griffin, Michael E. Thase.</b> Differential transitions between cocaine use and abstinence for men and women.. <i>Journal of Consulting and Clinical Psychology</i> . 2007/02//. 75:95                                                    | Level 1, Form<br>Title/abstract<br>screen |
| 2628 | <b>Susan Dowd Stone.</b> Using dialectical behavior therapy in clinical practice: Client empowerment, social work values.. <i>Cognitive behavior therapy in clinical social work practice</i> .. 2007///. #volume#:147                                                                                                                                | Level 1, Form<br>Title/abstract<br>screen |
| 2629 | <b>Christina Rosen Galvin, John Sommers-Flanagan, Linwood G. Vereen.</b> 'Are you saying Corey is an addict?': Childhood substance abuse.. <i>Critical incidents in counseling children</i> .. 2007///. #volume#:337                                                                                                                                  | Level 1, Form<br>Title/abstract<br>screen |
| 2630 | <b>Maria Hodermarska, Suzannah Scott-Moncrieff.</b> Operatic play: A drama and                                                                                                                                                                                                                                                                        | Level 1, Form                             |

|      |                                                                                                                                                                                                                                                                                             |                                     |
|------|---------------------------------------------------------------------------------------------------------------------------------------------------------------------------------------------------------------------------------------------------------------------------------------------|-------------------------------------|
|      | music therapy collaboration.. <i>Healing the inner city child: Creative arts therapies with at-risk youth</i> .. 2007///. #volume#:242                                                                                                                                                      | Title/abstract screen               |
| 2631 | <b>Steven P. Verney, Billie Jo Kipp.</b> Acculturation and alcohol treatment in ethnic minority populations: Assessment issues and implications.. <i>Alcoholism Treatment Quarterly</i> . 2007///. 25:47                                                                                    | Level 1, Form Title/abstract screen |
| 2632 | <b>Howard A. Paul.</b> Review of The therapist's guide to psychopharmacology: Working with patients, families, and physicians to optimize care.. <i>Child &amp; Family Behavior Therapy</i> . 2007///. 29:83                                                                                | Level 1, Form Title/abstract screen |
| 2633 | <b>Andrea Savage, Laura Quiros, Sarah-Jane Dodd, Diane Bonavota.</b> Building trauma informed practice: Appreciating the impact of trauma in the lives of women with substance abuse and mental health problems.. <i>Journal of Social Work Practice in the Addictions</i> . 2007///. 7:91  | Level 2, Form Full Text Screening   |
| 2635 | <b>Doreen D. Salina, Linda M. Lesondak, Lisa A. Razzano, Ann Weilbaeher.</b> Co-occurring mental disorders among incarcerated women: Preliminary findings from an integrated health treatment study.. <i>Journal of Offender Rehabilitation</i> . 2007///. 45:207                           | Level 1, Form Title/abstract screen |
| 2636 | <b>Sarah W. Feldstein, Alyssa A. Forcehimes.</b> Motivational interviewing with underage college drinkers: A preliminary look at the role of empathy and alliance.. <i>The American Journal of Drug and Alcohol Abuse</i> . 2007///. 33:737                                                 | Level 1, Form Title/abstract screen |
| 2637 | <b>Susan M. Grantham.</b> Major depression and alcohol comorbidity in an elderly population: Access, outcomes, and services use.. <i>Dissertation Abstracts International Section A: Humanities and Social Sciences</i> . 2007///. 68:1153                                                  | Level 1, Form Title/abstract screen |
| 2638 | <b>Michele M. Sutcliffe.</b> A program evaluation of the pediatric behavioral health project: A co-location model of integrated behavioral health care.. <i>Dissertation Abstracts International: Section B: The Sciences and Engineering</i> . 2007///. 68:1946                            | Level 1, Form Title/abstract screen |
| 2639 | <b>Andrew J. Darchuk.</b> The role of the therapeutic alliance and its relationship to treatment outcome and client motivation in an adolescent substance abuse treatment setting.. <i>Dissertation Abstracts International: Section B: The Sciences and Engineering</i> . 2007///. 68:3392 | Level 1, Form Title/abstract screen |
| 2640 | <b>Michael C. Wolff.</b> Substance abuse counseling: Exploring the pathways of therapeutic process.. <i>Dissertation Abstracts International: Section B: The Sciences and Engineering</i> . 2007///. 67:4728                                                                                | Level 2, Form Full Text Screening   |
| 2641 | <b>Stephen Brayton Woolley.</b> Mental illness, its treatment, and symptoms of mental and physical illness.. <i>Dissertation Abstracts International: Section B: The Sciences and Engineering</i> . 2007///. 67:5459                                                                        | Level 1, Form Title/abstract screen |
| 2642 | <b>Martin Cortez Wesley.</b> Animal-assisted therapy and the therapeutic alliance in the treatment of substance dependence.. <i>Dissertation Abstracts International: Section B: The Sciences and Engineering</i> . 2007///. 67:6083                                                        | Level 2, Form Full Text Screening   |
| 2643 | <b>Hoyle Leigh, John Mark Streltzer.</b> Handbook of consultation-liaison psychiatry.. #journal#. 2007///. #volume#: #pages#                                                                                                                                                                | Level 1, Form Title/abstract screen |
| 2644 | <b>Glenn N. Saxe, B. Heidi Ellis, Julie B. Kaplow.</b> Collaborative treatment of traumatized children and teens: The trauma systems therapy approach.. #journal#. 2007///. #volume#: #pages#                                                                                               | Level 1, Form Title/abstract screen |
| 2645 | <b>Myrna M. Weissman, John C. Markowitz, Gerald L. Klerman.</b> Clinician's quick guide to interpersonal psychotherapy.. #journal#. 2007///. #volume#: #pages#                                                                                                                              | Level 1, Form Title/abstract screen |

|      |                                                                                                                                                                                                                                                                                                                |                                           |
|------|----------------------------------------------------------------------------------------------------------------------------------------------------------------------------------------------------------------------------------------------------------------------------------------------------------------|-------------------------------------------|
| 2646 | <b>Mayyada Wazaify, Carmel M. Hughes, James C. McElnay.</b> The implementation of a harm minimisation model for the identification and treatment of over-the-counter drug misuse and abuse in community pharmacies in Northern Ireland.. <i>Patient Education and Counseling</i> . 2006/12//. 64:136           | Level 1, Form<br>Title/abstract<br>screen |
| 2647 | <b>Christopher D. Carroll, Ronald W. Manderscheid, Allen S. Daniels, Amelia Compagni.</b> Convergence of Service, Policy, and Science Toward Consumer-Driven Mental Health Care.. <i>Journal of Mental Health Policy and Economics</i> . 2006/12//. 9:185                                                      | Level 1, Form<br>Title/abstract<br>screen |
| 2651 | <b>Monica H. Swahn, John E. Donovan.</b> Alcohol and violence: Comparison of the psychosocial correlates of adolescent involvement in alcohol-related physical fighting versus other physical fighting.. <i>Addictive Behaviors</i> . 2006/11//. 31:2014                                                       | Level 1, Form<br>Title/abstract<br>screen |
| 2652 | <b>Aloen L. Townsend, David E. Biegel, Karen J. Ishler, Barbara Wieder, Amy Rini.</b> Families of Persons With Substance Use and Mental Disorders: A Literature Review and Conceptual Framework.. <i>Family Relations: An Interdisciplinary Journal of Applied Family Studies</i> . 2006/10//. 55:473          | Level 1, Form<br>Title/abstract<br>screen |
| 2654 | <b>Louis J. Prezenza.</b> Naltrexone as a 'mandate' or as a choice: Comments on 'Judicially mandated naltrexone use by criminal offenders: A legal analysis.'. <i>Journal of Substance Abuse Treatment</i> . 2006/09//. 31:129                                                                                 | Level 1, Form<br>Title/abstract<br>screen |
| 2657 | <b>Ron Langevin.</b> Acceptance and Completion of Treatment Among Sex Offenders.. <i>International Journal of Offender Therapy and Comparative Criminology</i> . 2006/08//. 50:402                                                                                                                             | Level 1, Form<br>Title/abstract<br>screen |
| 2660 | <b>Steven H. Woolf, Alex H. Krist, Robert E. Johnson, Diane B. Wilson, Stephen F. Rothemich, Gregory J. Norman, Kelly J. Devers.</b> 'A Practice-Sponsored Web Site to Help Patients Pursue Healthy Behaviors: An ACORN Study': Corrections.. <i>Annals of Family Medicine</i> . 2006/07//Jul-Aug, 2006. 4:371 | Level 1, Form<br>Title/abstract<br>screen |
| 2661 | <b>Michael Fendrich, Amy Hubbell, Arthur J. Lurigio.</b> Providers' perceptions of gender-specific drug treatment.. <i>Journal of Drug Issues</i> . 2006///Sum 2006. 36:667                                                                                                                                    | Level 1, Form<br>Title/abstract<br>screen |
| 2664 | <b>Nancy Suchman, Marjukka Pajulo, Cindy DeCoste, Linda Mayes.</b> Parenting interventions for drug-dependent mothers and their young children: the case for an attachment-based approach.. <i>Family Relations: An Interdisciplinary Journal of Applied Family Studies</i> . 2006/04//. 55:211                | Level 1, Form<br>Title/abstract<br>screen |
| 2665 | <b>Amelia Compagni, Ronald W. Manderscheid.</b> A Neuroscientist-Consumer Alliance to Transform Mental Health Care.. <i>The Journal of Behavioral Health Services &amp; Research</i> . 2006/04//. 33:265                                                                                                       | Level 1, Form<br>Title/abstract<br>screen |
| 2667 | <b>Catherine J. Datto, Richard Thompson, Kathryn Knott, Ira R. Katz.</b> Older Adult Report of Change in Depressive Symptoms as a Treatment Decision Tool.. <i>Journal of the American Geriatrics Society</i> . 2006/04//. 54:627                                                                              | Level 1, Form<br>Title/abstract<br>screen |
| 2668 | <b>Robert Elliott, Dave Mearns, Peter F. Schmid, William B. Stiles.</b> Potsdam and beyond.. <i>Person-Centered and Experiential Psychotherapies</i> . 2006///Spr 2006. 5:1                                                                                                                                    | Level 1, Form<br>Title/abstract<br>screen |
| 2674 | <b>Ralph Aquila, John Kelleher, Thomas Sweet.</b> Housing.. <i>Clinical guide to the treatment of the mentally ill homeless person</i> .. 2006///. #volume#:65                                                                                                                                                 | Level 1, Form<br>Title/abstract<br>screen |
| 2675 | <b>A. Simpson.</b> Shared care and inter-professional practice.. <i>Dual diagnosis nursing</i> .. 2006///. #volume#:130                                                                                                                                                                                        | Level 1, Form<br>Title/abstract<br>screen |
| 2678 | <b>Elizabeth H. B. Lin, Wayne Katon, Carolyn Rutter, Greg E. Simon, Evette</b>                                                                                                                                                                                                                                 | Level 1, Form                             |



|      |                                                                                                                                                                                                                                                                                                                                                                                                    |                                     |
|------|----------------------------------------------------------------------------------------------------------------------------------------------------------------------------------------------------------------------------------------------------------------------------------------------------------------------------------------------------------------------------------------------------|-------------------------------------|
|      | <b>J. Ludman, Michael Von Korjff, Bessie Young, Malia Oliver, Paul C. Ciechanowski, Leslie Kinder, Edward Walker.</b> Effects of Enhanced Depression Treatment on Diabetes Self-Care.. <i>Annals of Family Medicine</i> . 2006/01//Jan-Feb, 2006. 4:46                                                                                                                                             | Title/abstract screen               |
| 2681 | <b>Douglas L. Polcin.</b> Reexamining confrontation and motivational interviewing.. <i>Addictive Disorders &amp; Their Treatment</i> . 2006///. 5:201                                                                                                                                                                                                                                              | Level 1, Form Title/abstract screen |
| 2684 | <b>Leslie Alkalay.</b> Profiling adolescent substance abusers by therapeutic alliance.. <i>Dissertation Abstracts International: Section B: The Sciences and Engineering</i> . 2006///. 67:2822                                                                                                                                                                                                    | Level 2, Form Full Text Screening   |
| 2685 | <b>Lesia M. Ruglass.</b> Ethnocultural differences in therapeutic alliance and outcome for women with comorbid posttraumatic stress disorder and substance use disorder.. <i>Dissertation Abstracts International: Section B: The Sciences and Engineering</i> . 2006///. 66:4499                                                                                                                  | Level 2, Form Full Text Screening   |
| 2686 | <b>Thuy Tran Boardman.</b> Motivational interviewing: Examining the therapeutic process.. <i>Dissertation Abstracts International: Section B: The Sciences and Engineering</i> . 2006///. 66:6262                                                                                                                                                                                                  | Level 2, Form Full Text Screening   |
| 2687 | <b>Anna Chur-Hansen.</b> 'Adding Life to Years': A Manual of Instruction for Practitioners to Help Clients Quit Smoking.. <i>PsycCRITIQUES</i> . 2006///. 51:#pages#                                                                                                                                                                                                                               | Level 1, Form Title/abstract screen |
| 2688 | <b>Christopher Gillberg, Richard Harrington, Hans-Christoph Steinhausen.</b> A clinician's handbook of child and adolescent psychiatry.. #journal#. 2006///. #volume#:#pages#                                                                                                                                                                                                                      | Level 1, Form Title/abstract screen |
| 2689 | <b>Zoë Henderson.</b> Review of Drug induced. Addiction and treatment in perspective.. <i>Drugs: Education, Prevention &amp; Policy</i> . 2005/12//. 12:511                                                                                                                                                                                                                                        | Level 1, Form Title/abstract screen |
| 2691 | <b>Monica Paccaloni, Francesca Moretti, Christa Zimmermann.</b> Le informazioni fornite e il coinvolgimento alla cura in psichiatria: Cosa pensano gli psichiatri? Una revisione della letteratura. = Giving information and involving in treatment: What do psychiatrists think? A review.. <i>Epidemiologia e Psichiatria Sociale</i> . 2005/10//Oct-Dec, 2005. 14:198                           | Level 1, Form Title/abstract screen |
| 2692 | <b>David Leonard, Susan Brann, John Tiller.</b> Dissociative disorders: Pathways to diagnosis, clinician attitudes and their impact.. <i>Australian and New Zealand Journal of Psychiatry</i> . 2005/10//. 39:940                                                                                                                                                                                  | Level 1, Form Title/abstract screen |
| 2695 | <b>Alain D Lesage.</b> Can Psychiatrists Prevent Suicide? Yes, in Collaboration.. <i>The Canadian Journal of Psychiatry / La Revue canadienne de psychiatrie</i> . 2005/08//. 50:507                                                                                                                                                                                                               | Level 1, Form Title/abstract screen |
| 2698 | <b>Mads Uffe Pedersen.</b> Arbejdsalliancens todimensionalitet og dens betydning for behandling af heroinafhængige: En kvantitativ undersøgelse af forskellige allianceskalaer. = The Two-Dimensionality of the Working Alliance and some Implications for Treatment of Heroin Dependent Persons. A quantitative study of different alliance scales.. <i>Nordisk Psykologi</i> . 2005/07//. 57:131 | Level 2, Form Full Text Screening   |
| 2700 | <b>Satish Kedia, Stephanie W. Perry.</b> Factors associated with client-collateral agreement in substance abuse post-treatment self-reports.. <i>Addictive Behaviors</i> . 2005/07//. 30:1086                                                                                                                                                                                                      | Level 1, Form Title/abstract screen |
| 2702 | <b>Saxby Pridmore.</b> Review of Pain and depression. An interdisciplinary client-centered approach. Advances in psychosomatic medicine, Vol. 25.. <i>Australian and New Zealand Journal of Psychiatry</i> . 2005/05//. 39:427                                                                                                                                                                     | Level 1, Form Title/abstract screen |
| 2703 | <b>Daniela Wittmann.</b> Review of Social Skills Training for Schizophrenia                                                                                                                                                                                                                                                                                                                        | Level 1, Form                       |

|      |                                                                                                                                                                                                                                                                                                                                                                                          |                                     |
|------|------------------------------------------------------------------------------------------------------------------------------------------------------------------------------------------------------------------------------------------------------------------------------------------------------------------------------------------------------------------------------------------|-------------------------------------|
|      | (Second Edition) A Step-by-Step Guide.. <i>Annals of Clinical Psychiatry</i> . 2005/04//Apr-Jun, 2005. 17:102                                                                                                                                                                                                                                                                            | Title/abstract screen               |
| 2704 | <b>Connie R. Matthews, Peggy Lorah.</b> An Examination of Addiction Treatment Completion by Gender and Ethnicity.. <i>Journal of Addictions &amp; Offender Counseling</i> . 2005/04//. 25:114                                                                                                                                                                                            | Level 1, Form Title/abstract screen |
| 2705 | <b>Maurice Dongier.</b> Review of Integrated Treatment for Dual Disorders. A Guide to Effective Practice.. <i>The Canadian Journal of Psychiatry / La Revue canadienne de psychiatrie</i> . 2005/04//. 50:299                                                                                                                                                                            | Level 1, Form Title/abstract screen |
| 2706 | <b>Ronda L. Dearing, Christopher Barrick, Kurt H. Dermen, Kimberly S. Walitzer.</b> Indicators of Client Engagement: Influences on Alcohol Treatment Satisfaction and Outcomes.. <i>Psychology of Addictive Behaviors</i> . 2005/03//. 19:71                                                                                                                                             | Level 1, Form Title/abstract screen |
| 2708 | <b>Kathleen M. Carroll.</b> Editorial: Only connect?. <i>Addiction</i> . 2005/03//. 100:267                                                                                                                                                                                                                                                                                              | Level 1, Form Title/abstract screen |
| 2710 | <b>Roger D. Weiss, Margaret L. Griffin, Robert J. Gallop, Lisa M. Najavits, Arlene Frank, Paul Crits-Christoph, Michael E. Thase, Jack Blaine, David R. Gastfriend, Dennis Daley, Lester Luborsky.</b> The effect of 12-step self-help group attendance and participation on drug use outcomes among cocaine-dependent patients.. <i>Drug and Alcohol Dependence</i> . 2005/02//. 77:177 | Level 1, Form Title/abstract screen |
| 2711 | <b>Patrick Boyle, Christina M. Delos Reyes, Richard A. Kruszynski.</b> Integrated Dual-Disorder Treatment.. <i>Evidence-based mental health practice: A textbook</i> .. 2005//. #volume#:349                                                                                                                                                                                             | Level 2, Form Full Text Screening   |
| 2714 | <b>Richard Dembo, Wansley Walters, Kathleen Meyers.</b> A Practice/Research Collaborative: An Innovative Approach to Identifying and Responding to Psychosocial Functioning Problems and Recidivism Risk Among Juvenile Arrestees.. <i>Journal of Offender Rehabilitation</i> . 2005//. 41:39                                                                                            | Level 1, Form Title/abstract screen |
| 2715 | <b>Irene Panagopoulos, Lina A. Ricciardelli.</b> Harm reduction and decision making among recreational ecstasy users.. <i>International Journal of Drug Policy</i> . 2005/01//. 16:54                                                                                                                                                                                                    | Level 1, Form Title/abstract screen |
| 2716 | <b>Sharlene A. Wolchik, Irwin N. Sandler, Emily Winslow, Vicki Smith-Daniels.</b> Programs for Promoting Parenting of Residential Parents: Moving From Efficacy to Effectiveness.. <i>Family Court Review</i> . 2005/01//. 43:65                                                                                                                                                         | Level 1, Form Title/abstract screen |
| 2718 | <b>Carla Maine.</b> Feminist-narrative therapy: Treating PTSD and substance abuse in women.. <i>Dissertation Abstracts International: Section B: The Sciences and Engineering</i> . 2005//. 66:564                                                                                                                                                                                       | Level 1, Form Title/abstract screen |
| 2719 | <b>Sharon M. Flicker.</b> The relationship between ethnic matching, therapeutic alliance, and treatment outcome with Hispanic and Anglo adolescents in family therapy.. <i>Dissertation Abstracts International: Section B: The Sciences and Engineering</i> . 2005//. 65:4282                                                                                                           | Level 2, Form Full Text Screening   |
| 2720 | <b>Lana R. Gaiton.</b> Investigation of therapeutic alliance in a treatment study with substance-abusing women with PTSD.. <i>Dissertation Abstracts International: Section B: The Sciences and Engineering</i> . 2005//. 65:4828                                                                                                                                                        | Level 2, Form Full Text Screening   |
| 2721 | <b>Julie M. Liszka-Chaloner.</b> An exploration of the relationship of attachment style and working alliance on substance abuse client treatment satisfaction.. <i>Dissertation Abstracts International: Section B: The Sciences and Engineering</i> . 2005//. 65:6660                                                                                                                   | Level 2, Form Full Text Screening   |
| 2722 | <b>Andrés G. Gil, Eric F. Wagner, Jonathan G. Tubman.</b> Culturally sensitive substance abuse intervention for Hispanic and African American adolescents:                                                                                                                                                                                                                               | Level 1, Form Title/abstract        |

|      |                                                                                                                                                                                                                                                                                                                                                       |                                           |
|------|-------------------------------------------------------------------------------------------------------------------------------------------------------------------------------------------------------------------------------------------------------------------------------------------------------------------------------------------------------|-------------------------------------------|
|      | Empirical examples from the Alcohol Treatment Targeting Adolescents in Need (ATTAIN) Project.. <i>Addiction</i> . 2004/11//. 99:140                                                                                                                                                                                                                   | screen                                    |
| 2724 | <b>Sylvia Dennison</b> . Review of Seeking Safety: A Treatment Manual for PTSD and Substance Misuse.. <i>The American Journal on Addictions</i> . 2004/10//Oct-Dec, 2004. 13:501                                                                                                                                                                      | Level 1, Form<br>Title/abstract<br>screen |
| 2725 | <b>Lynne Siqueland, Paul Crits-Christoph, Jacques P. Barber, Mary Beth Connolly Gibbons, Robert Gallop, Margaret Griffin, Arlene Frank, Michael E. Thase, Lester Luborsky, Bruce Liese</b> . What aspects of treatment matter to the patient in the treatment of cocaine dependence?. <i>Journal of Substance Abuse Treatment</i> . 2004/09//. 27:169 | Level 1, Form<br>Title/abstract<br>screen |
| 2726 | <b>Dan Chisholm, Kristy Sanderson, Jose Luis Ayuso-Mateos, Shekhar Saxena</b> . Reducing the global burden of depression: Population-level analysis of intervention cost-effectiveness in 14 world regions.. <i>The British Journal of Psychiatry</i> . 2004/05//. 184:393                                                                            | Level 1, Form<br>Title/abstract<br>screen |
| 2730 | <b>Peter Schlebusch</b> . Review of Problem drinking: A person-centred dialogue.. <i>Person-Centered and Experiential Psychotherapies</i> . 2004///Spr 2004. 3:70                                                                                                                                                                                     | Level 1, Form<br>Title/abstract<br>screen |
| 2731 | <b>Jon Glasby, Helen Lester</b> . Cases for change in mental health: partnership working in mental health services.. <i>Journal of Interprofessional Care</i> . 2004/02//. 18:7                                                                                                                                                                       | Level 1, Form<br>Title/abstract<br>screen |
| 2732 | <b>Joanne Neale</b> . Drug driving in Scotland: Prevalence and correlates amongst drug users entering treatment.. <i>International Journal of Drug Policy</i> . 2004/02//. 15:27                                                                                                                                                                      | Level 1, Form<br>Title/abstract<br>screen |
| 2733 | <b>Richard Dobbins</b> . Spiritual interventions in the treatment of dysthymia and alcoholism.. <i>Casebook for a spiritual strategy in counseling and psychotherapy</i> .. 2004///. #volume#:105                                                                                                                                                     | Level 2, Form<br>Full Text<br>Screening   |
| 2734 | <b>Meredith Hanson, Nabila El-Bassel</b> . Motivating substance-abusing clients through the helping process.. <i>Clinical work with substance-abusing clients</i> .. 2004///. #volume#:39                                                                                                                                                             | Level 1, Form<br>Title/abstract<br>screen |
| 2735 | <b>Marion S. Forgatch, Bernadette Marie Bullock, Gerald R. Patterson</b> . From Theory to Practice: Increasing Effective Parenting Through Role-Play.. <i>Handbook of mental health interventions in children and adolescents: An integrated developmental approach</i> .. 2004///. #volume#:782                                                      | Level 1, Form<br>Title/abstract<br>screen |
| 2736 | <b>Gerard J. Connors, Scott H. Stewart</b> . Alcohol and Other Substance Use Disorders.. <i>Handbook of primary care psychology</i> .. 2004///. #volume#:187                                                                                                                                                                                          | Level 1, Form<br>Title/abstract<br>screen |
| 2737 | <b>C. Robert Cloninger</b> . Sickly.. <i>Treatment companion to the DSM-IV-TR casebook</i> .. 2004///. #volume#:306                                                                                                                                                                                                                                   | Level 1, Form<br>Title/abstract<br>screen |
| 2738 | <b>Jacques P. Barber, Carol Foltz, Paul Crits-Christoph, Jesse Chittams</b> . Therapists' Adherence and Competence and Treatment Discrimination in the NIDA Collaborative Cocaine Treatment Study.. <i>Journal of Clinical Psychology</i> . 2004/01//. 60:29                                                                                          | Level 1, Form<br>Title/abstract<br>screen |
| 2740 | <b>Stanton Peele</b> . How I Found Common Cause with Social Workers.. <i>Journal of Social Work Practice in the Addictions</i> . 2004///. 4:117                                                                                                                                                                                                       | Level 1, Form<br>Title/abstract<br>screen |
| 2743 | <b>Roberto Secades-Villa, José Ramón Fernández-Hermida, Cristina Arnáez-Montaraz</b> . Motivational interviewing and treatment retention among drug user patients: A pilot study.. <i>Substance Use &amp; Misuse</i> . 2004///. 39:1369                                                                                                               | Level 1, Form<br>Title/abstract<br>screen |

|      |                                                                                                                                                                                                                                                                                                                                                |                                     |
|------|------------------------------------------------------------------------------------------------------------------------------------------------------------------------------------------------------------------------------------------------------------------------------------------------------------------------------------------------|-------------------------------------|
| 2744 | <b>Nathilee A. Caldeira.</b> Dissociation and treatment outcome in urban women with comorbid PTSD and substance use disorders.. <i>Dissertation Abstracts International: Section B: The Sciences and Engineering</i> . 2004///. 65:1540                                                                                                        | Level 1, Form Title/abstract screen |
| 2745 | <b>Jolae Brocato.</b> Predictors of client retention in alternative-to-prison substance abuse programs.. <i>Dissertation Abstracts International Section A: Humanities and Social Sciences</i> . 2004///. 65:1963                                                                                                                              | Level 1, Form Title/abstract screen |
| 2747 | <b>Eva Kit-San Pang.</b> Substance abuse in a Chinese-American family: A qualitative analysis of family attitudes and experiences.. <i>Dissertation Abstracts International: Section B: The Sciences and Engineering</i> . 2004///. 65:2644                                                                                                    | Level 1, Form Title/abstract screen |
| 2748 | <b>Cheryl L. Pugh.</b> An interface of the twelve-step theory and Afrocentric theory for the treatment of substance abuse in African Americans.. <i>Dissertation Abstracts International: Section B: The Sciences and Engineering</i> . 2004///. 64:5798                                                                                       | Level 1, Form Title/abstract screen |
| 2749 | <b>W. Robert Nay.</b> Taking charge of anger: How to resolve conflict, sustain relationships, and express yourself without losing control.. #journal#. 2004///. #volume#:#pages#                                                                                                                                                               | Level 1, Form Title/abstract screen |
| 2750 | <b>Eileen Britt, Neville M. Blampied, Stephen M. Hudson.</b> Motivational interviewing: A review.. <i>Australian Psychologist</i> . 2003/11///. 38:193                                                                                                                                                                                         | Level 1, Form Title/abstract screen |
| 2751 | <b>William D. Marelich, D. A. Murphy.</b> Effects of empowerment among HIV-positive women on the patient-provider relationship.. <i>AIDS Care</i> . 2003/08///. 15:475                                                                                                                                                                         | Level 1, Form Title/abstract screen |
| 2752 | <b>Roger D. Weiss, Margaret L. Griffin, Carissa Mazurick, Benjamin Berkman, David R. Gastfriend, Arlene Frank, Jacques P. Barber, Jack Blaine, Ihsan Salloum, Karla Moras.</b> The Relationship Between Cocaine Craving, Psychosocial Treatment, and Subsequent Cocaine Use.. <i>The American Journal of Psychiatry</i> . 2003/07///. 160:1320 | Level 1, Form Title/abstract screen |
| 2756 | <b>Cheryl A. Hosley, Linda Gensheimer, Mai Yang.</b> Building Effective Working Relationships Across Culturally and Ethnically Diverse Communities.. <i>Child Welfare: Journal of Policy, Practice, and Program</i> . 2003/03//Mar-Apr, 2003. 82:157                                                                                           | Level 1, Form Title/abstract screen |
| 2757 | <b>Jonathan Andrew Pastor.</b> Latino clinicians' perceptions of Latino men in psychotherapy: An exploratory study.. <i>Dissertation Abstracts International: Section B: The Sciences and Engineering</i> . 2003/03///. 63:3933                                                                                                                | Level 1, Form Title/abstract screen |
| 2758 | <b>Alice A. Gleghorn, Frances Cotter.</b> National and local perspectives on the Center for Substance Abuse Treatment Practice/Research Collaborative and Practice Improvement Collaborative Initiatives.. <i>Drug abuse treatment through collaboration: Practice and research partnerships that work</i> .. 2003///. #volume#:213            | Level 1, Form Title/abstract screen |
| 2759 | <b>Sheila Krystal.</b> A Nondual Approach To EMDR: Psychotherapy as Satsang.. <i>The sacred mirror: Nondual wisdom and psychotherapy</i> .. 2003///. #volume#:116                                                                                                                                                                              | Level 1, Form Title/abstract screen |
| 2760 | <b>Carlo C. DiClemente, Kathleen M. Carroll, William R. Miller, Gerard J. Connors, Dennis M. Donovan.</b> A look inside treatment: Therapist effects, the therapeutic alliance, and the process of intentional behavior change.. <i>Treatment matching in alcoholism</i> .. 2003///. #volume#:166                                              | Level 1, Form Title/abstract screen |
| 2762 | . Review of Addiction Treatment: A Strengths Perspective.. <i>Family Therapy</i> . 2003///. 30:62                                                                                                                                                                                                                                              | Level 1, Form Title/abstract screen |

|      |                                                                                                                                                                                                                                                                                                                                                                                           |                                           |
|------|-------------------------------------------------------------------------------------------------------------------------------------------------------------------------------------------------------------------------------------------------------------------------------------------------------------------------------------------------------------------------------------------|-------------------------------------------|
| 2763 | <b>Lynne Siqueland, Paul Crits-Christoph, Bob Gallop, David Gastfriend, Judy Lis, Arlene Frank, Margaret Griffin, Jack Blaine, Lester Luborsky.</b> Who starts treatment: Engagement in the NIDA collaborative cocaine treatment study.. <i>The American Journal on Addictions</i> . 2002///Win 2002. 11:10                                                                               | Level 1, Form<br>Title/abstract<br>screen |
| 2764 | <b>Lynne Siqueland, Paul Crits-Christoph, Robert Gallop, Jacques P. Barber, Margaret L. Griffin, Michael E. Thase, Denis Daley, Arlene Frank, David R. Gastfriend, Jack Blaine, Mary Beth Connolly, Madeline Gladis.</b> Retention in psychosocial treatment of cocaine dependence: Predictors and impact on outcome.. <i>The American Journal on Addictions</i> . 2002///Win 2002. 11:24 | Level 1, Form<br>Title/abstract<br>screen |
| 2767 | <b>R. Conviser, M. B. Pounds.</b> The role of ancillary services in client-centered systems of care.. <i>AIDS Care</i> . 2002/08//. 14:S119                                                                                                                                                                                                                                               | Level 1, Form<br>Title/abstract<br>screen |
| 2769 | <b>L. A. Aday.</b> A health services research perspective on the use of ancillary services to retain persons living with HIV/AIDS in primary care.. <i>AIDS Care</i> . 2002/08//. 14:S133                                                                                                                                                                                                 | Level 1, Form<br>Title/abstract<br>screen |
| 2770 | <b>Robert I. Simon, Thomas G. Gutheil.</b> A recurrent pattern of suicide risk factors observed in litigated cases: Lessons in risk management.. <i>Psychiatric Annals</i> . 2002/07//. 32:384                                                                                                                                                                                            | Level 1, Form<br>Title/abstract<br>screen |
| 2771 | <b>Noreen Lillie.</b> Women, alcohol, self-concept and self-esteem: A qualitative study of the experience of person-centred counselling.. <i>Counselling &amp; Psychotherapy Research</i> . 2002/06//. 2:99                                                                                                                                                                               | Level 2, Form<br>Full Text<br>Screening   |
| 2772 | <b>J. Arthur Jr. Gillaspay, Anna R. Wright, Catherine Campbell, Sandra Stokes, Byron Adinoff.</b> Group alliance and cohesion as predictors of drug and alcohol abuse treatment outcomes.. <i>Psychotherapy Research</i> . 2002///Sum 2002. 12:213                                                                                                                                        | Level 1, Form<br>Title/abstract<br>screen |
| 2773 | <b>Suzanne Spear, Richard A. Rawson.</b> Perspectives from the conference, 'Common Ground, Common Goals, Common Language: Bringing Substance Abuse Practice and Research Together.'. <i>Journal of Drug Issues</i> . 2002///Sum 2002. 32:751                                                                                                                                              | Level 1, Form<br>Title/abstract<br>screen |
| 2774 | <b>H. Westley Clark.</b> Bridging the gap between substance abuse practice and research: The National Treatment Plan Initiative.. <i>Journal of Drug Issues</i> . 2002///Sum 2002. 32:757                                                                                                                                                                                                 | Level 1, Form<br>Title/abstract<br>screen |
| 2775 | <b>Kathryn I. Pollack, Kimberly S. H. Yarnall, Barbara K. Rimer, Isaac Lipkus, Pauline R. Lyna.</b> Factors associated with patient-recalled smoking cessation advice in a low-income clinic.. <i>Journal of the National Medical Association</i> . 2002/05//. 94:354                                                                                                                     | Level 1, Form<br>Title/abstract<br>screen |
| 2777 | <b>Margaret K. Keiley.</b> Case 13. Visiting all the monsters.. <i>Clinical epiphanies in marital and family therapy: A practitioner's casebook of therapeutic insights, perceptions, and breakthroughs</i> .. 2002///. #volume#:317                                                                                                                                                      | Level 1, Form<br>Title/abstract<br>screen |
| 2778 | <b>Eric E. McCollum.</b> Trading monsters for dreams.. <i>Clinical epiphanies in marital and family therapy: A practitioner's casebook of therapeutic insights, perceptions, and breakthroughs</i> .. 2002///. #volume#:330                                                                                                                                                               | Level 1, Form<br>Title/abstract<br>screen |
| 2779 | <b>Leslie L. Feinauer.</b> Embracing monsters.. <i>Clinical epiphanies in marital and family therapy: A practitioner's casebook of therapeutic insights, perceptions, and breakthroughs</i> .. 2002///. #volume#:336                                                                                                                                                                      | Level 1, Form<br>Title/abstract<br>screen |
| 2780 | <b>Deborah Jones-Saumty.</b> Substance abuse treatment for Native Americans.. <i>Ethnicity and substance abuse: Prevention and intervention</i> .. 2002///. #volume#:270                                                                                                                                                                                                                  | Level 2, Form<br>Full Text<br>Screening   |

|      |                                                                                                                                                                                                                                                                                                                                                       |                                           |
|------|-------------------------------------------------------------------------------------------------------------------------------------------------------------------------------------------------------------------------------------------------------------------------------------------------------------------------------------------------------|-------------------------------------------|
| 2782 | <b>John Macleod.</b> Working with people who use illicit drugs.. <i>Promoting collaboration in primary mental health care..</i> 2002///. #volume#:158                                                                                                                                                                                                 | Level 1, Form<br>Title/abstract<br>screen |
| 2783 | <b>Kurt Renders.</b> Individuele motivationele cliëntgerichte psychotherapie met drugsgebruikers. = Individual motivational client-centered psychotherapy of substance abusers.. <i>Tijdschrift voor Psychotherapie.</i> 2002/01//. 28:17                                                                                                             | Level 2, Form<br>Full Text<br>Screening   |
| 2786 | <b>Drew D. Wallace.</b> Therapeutic alliance and the mediation of patient factors in treatment outcome: Latent variable path model.. <i>Dissertation Abstracts International: Section B: The Sciences and Engineering.</i> 2002/01//. 62:3393                                                                                                         | Level 1, Form<br>Title/abstract<br>screen |
| 2787 | <b>Katherine Tyson, Emily Carroll.</b> Innovative therapeutic care for homeless, mentally ill clients: Intrapsychic humanism in a residential setting.. <i>Families in Society.</i> 2001/11//Nov-Dec, 2001. 82:591                                                                                                                                    | Level 1, Form<br>Title/abstract<br>screen |
| 2788 | <b>Angela Maureen Kirk.</b> The perceptions and experiences of HIV positive individuals concerning the obstacles to their medical care.. <i>Dissertation Abstracts International: Section B: The Sciences and Engineering.</i> 2001/11//. 62:2488                                                                                                     | Level 1, Form<br>Title/abstract<br>screen |
| 2789 | <b>Woody Caan.</b> Coming together on alcohol and drugs: A capital idea.. <i>Journal of Mental Health.</i> 2001/10//. 10:477                                                                                                                                                                                                                          | Level 1, Form<br>Title/abstract<br>screen |
| 2790 | <b>Paul Crits-Christoph, Lynne Siqueland, Elizabeth McCalmont, Roger D. Weiss, David R. Gastfriend, Arlene Frank, Karla Moras, Jacques P. Barber, Jack Blaine, Michael E. Thase.</b> Impact of psychosocial treatments on associated problems of cocaine-dependent patients.. <i>Journal of Consulting and Clinical Psychology.</i> 2001/10//. 69:825 | Level 1, Form<br>Title/abstract<br>screen |
| 2791 | <b>Lisa R. Fenton, John J. Cecero, Charla Nich, Tami L. Frankforter, Kathleen M. Carroll.</b> Perspective is everything: The predictive validity working alliance instruments.. <i>Journal of Psychotherapy Practice &amp; Research.</i> 2001//Fal 2001. 10:262                                                                                       | Level 1, Form<br>Title/abstract<br>screen |
| 2792 | <b>Timothy T. Freitas.</b> The relationship between neurocognitive impairment, working alliance, and length of stay in a therapeutic community.. <i>Dissertation Abstracts International: Section B: The Sciences and Engineering.</i> 2001/09//. 62:1573                                                                                             | Level 1, Form<br>Title/abstract<br>screen |
| 2794 | <b>Ralf Demmel.</b> Motivational interviewing: Ein Literaturüberblick. = Motivational Interviewing: A Review.. <i>Sucht: Zeitschrift für Wissenschaft und Praxis.</i> 2001/06//. 47:171                                                                                                                                                               | Level 2, Form<br>Full Text<br>Screening   |
| 2796 | <b>George De Leon.</b> A commentary on 'Retention in substance dependence treatment: The relevance of in-treatment factors.'. <i>Journal of Substance Abuse Treatment.</i> 2001/06//. 20:263                                                                                                                                                          | Level 1, Form<br>Title/abstract<br>screen |
| 2797 | <b>Paul John Lamberty.</b> The process of long-term recovery from substance abuse among African American men: Implications for counselor training and practice.. <i>Dissertation Abstracts International Section A: Humanities and Social Sciences.</i> 2001/06//. 61:4681                                                                            | Level 2, Form<br>Full Text<br>Screening   |
| 2798 | <b>Sarah Michaela Logan.</b> Predicting working alliance of substance-abusing clients and counselors.. <i>Dissertation Abstracts International: Section B: The Sciences and Engineering.</i> 2001/06//. 61:6743                                                                                                                                       | Level 1, Form<br>Title/abstract<br>screen |
| 2799 | <b>Suzanne Johnson.</b> The therapeutic alliance with early adolescents: Introduction of an instrument.. <i>Dissertation Abstracts International: Section B: The Sciences and Engineering.</i> 2001/04//. 61:5567                                                                                                                                     | Level 1, Form<br>Title/abstract<br>screen |
| 2803 | <b>Bernadine Kay Flynn.</b> The consumer/case manager working alliance and its                                                                                                                                                                                                                                                                        | Level 2, Form                             |

|      |                                                                                                                                                                                                                                                                                                                                               |                                     |
|------|-----------------------------------------------------------------------------------------------------------------------------------------------------------------------------------------------------------------------------------------------------------------------------------------------------------------------------------------------|-------------------------------------|
|      | relationship to dual-disordered client outcomes in a representative payee treatment program.. <i>Dissertation Abstracts International: Section B: The Sciences and Engineering</i> . 2001/02//. 61:4078                                                                                                                                       | Full Text Screening                 |
| 2804 | <b>Pia Marinangeli</b> . Italian culture and its impact on addiction.. <i>Ethnocultural factors in substance abuse treatment</i> .. 2001///. #volume#:216                                                                                                                                                                                     | Level 1, Form Title/abstract screen |
| 2805 | <b>Jim Gilbert, Jan Langrod</b> . Polish identity and substance abuse.. <i>Ethnocultural factors in substance abuse treatment</i> .. 2001///. #volume#:234                                                                                                                                                                                    | Level 1, Form Title/abstract screen |
| 2806 | <b>Mary Ann Bromley, S. K. Chhem Sip</b> . Substance abuse treatment issues with Cambodian Americans.. <i>Ethnocultural factors in substance abuse treatment</i> .. 2001///. #volume#:321                                                                                                                                                     | Level 1, Form Title/abstract screen |
| 2807 | <b>Daya Singh Sandhu, Ruby Malik</b> . Ethnocultural background and substance abuse treatment of Asian Indian Americans.. <i>Ethnocultural factors in substance abuse treatment</i> .. 2001///. #volume#:368                                                                                                                                  | Level 1, Form Title/abstract screen |
| 2809 | <b>Frederick K. Goodwin, S. Nassir Ghaemi</b> . The difficult-to-treat patient with bipolar disorder.. <i>The difficult-to-treat psychiatric patient</i> .. 2001///. #volume#:7                                                                                                                                                               | Level 1, Form Title/abstract screen |
| 2810 | <b>Garry Prouty</b> . Pre-therapy: A treatment method for people with mental retardation who are also psychotic.. <i>Treating mental illness and behavior disorders in children and adults with mental retardation</i> .. 2001///. #volume#:155                                                                                               | Level 1, Form Title/abstract screen |
| 2812 | <b>Glenn D. Walters</b> . The Shaman effect in counseling clients with alcohol problems.. <i>Alcoholism Treatment Quarterly</i> . 2001///. 19:31                                                                                                                                                                                              | Level 1, Form Title/abstract screen |
| 2813 | <b>Judith Mishne</b> . Transformation of narcissism and the intersubjective therapeutic exchange: A depressed adolescent patient shares his music and lyrics with his therapist.. <i>Psychoanalytic Social Work</i> . 2001///. 8:71                                                                                                           | Level 1, Form Title/abstract screen |
| 2814 | <b>Zora Raboteg-Šarić, Majda Rijavec, Andrea Brajša-Žganec</b> . The relation of parental practices and self-conceptions to young adolescent problem behaviors and substance use.. <i>Nordic Journal of Psychiatry</i> . 2001///. 55:203                                                                                                      | Level 1, Form Title/abstract screen |
| 2815 | <b>Patricia E. Penn, Audrey J. Brooks</b> . Five years, twelve steps, and REBT in the treatment of dual diagnosis.. <i>Journal of Rational-Emotive &amp; Cognitive-Behavior Therapy</i> . 2000//W in 2000. 18:197                                                                                                                             | Level 1, Form Title/abstract screen |
| 2817 | <b>Roger D. Weiss, Margaret L. Griffin, Robert Gallop, Lester Luborsky, Lynne Siqueland, Arlene Frank, Lisa S. Onken, Dennis C. Daley, David R. Gastfriend</b> . Predictors of self-help group attendance in cocaine dependent patients.. <i>Journal of Studies on Alcohol</i> . 2000/09//. 61:714                                            | Level 1, Form Title/abstract screen |
| 2818 | <b>Jennie Echols-Hurst</b> . Examination of a structural model of empowerment and patient satisfaction.. <i>Dissertation Abstracts International: Section B: The Sciences and Engineering</i> . 2000/09//. 61:1322                                                                                                                            | Level 1, Form Title/abstract screen |
| 2819 | <b>Craig Robert Lareau</b> . The effect of therapeutic alliance on perceived levels of formal and informal coercion.. <i>Dissertation Abstracts International: Section B: The Sciences and Engineering</i> . 2000/09//. 61:1640                                                                                                               | Level 1, Form Title/abstract screen |
| 2822 | <b>Elayne L. Chou</b> . Predictors of treatment acceptability, willingness to see a counselor, and counselor preferences for asian-americans and whites: Acculturation, loss of face, self-construals, and collective self-esteem.. <i>Dissertation Abstracts International: Section B: The Sciences and Engineering</i> . 2000/02//. 60:4209 | Level 1, Form Title/abstract screen |

|      |                                                                                                                                                                                                                                                                                                                                                                                                                                                                                                                                                                  |                                           |
|------|------------------------------------------------------------------------------------------------------------------------------------------------------------------------------------------------------------------------------------------------------------------------------------------------------------------------------------------------------------------------------------------------------------------------------------------------------------------------------------------------------------------------------------------------------------------|-------------------------------------------|
| 2823 | <b>Ian H. Gotlib, Pamela K. Schraedley.</b> Interpersonal psychotherapy.. <i>Handbook of psychological change: Psychotherapy processes &amp; practices for the 21st century..</i> 2000///. #volume#:258                                                                                                                                                                                                                                                                                                                                                          | Level 1, Form<br>Title/abstract<br>screen |
| 2827 | <b>Christie Crews Taylor.</b> An analysis of urban smokable cocaine clients' perception of intensive out-patient treatment dynamics and treatment outcome.. <i>Dissertation Abstracts International Section A: Humanities and Social Sciences.</i> 1999/08//. 60:0351                                                                                                                                                                                                                                                                                            | Level 1, Form<br>Title/abstract<br>screen |
| 2828 | <b>Richardt Sapir-Weise, Mats Berglund, Arne Frank, Hans Kristenson.</b> Acupuncture in alcoholism treatment: A randomized out-patient study.. <i>Alcohol and Alcoholism.</i> 1999/07//Jul-Aug, 1999. 34:629                                                                                                                                                                                                                                                                                                                                                     | Level 1, Form<br>Title/abstract<br>screen |
| 2829 | <b>Paul Crits-Christoph, Lynne Siqueland, Jack Blaine, Arlene Frank, Lester Luborsky, Lisa S. Onken, Larry R. Muenz, Michael E. Thase, Roger D. Weiss, David R. Gastfriend, George E. Woody, Jacques P. Barber, Stephen F. Butler, Dennis Daley, Ihsan Salloum, Sarah Bishop, Lisa M. Najavits, Judy Lis, Delinda Mercer, Margaret L. Griffin, Karla Moras, Aaron T. Beck.</b> Psychosocial treatments for cocaine dependence: National Institute on Drug Abuse Collaborative Cocaine Treatment Study.. <i>Archives of General Psychiatry.</i> 1999/06//. 56:493 | Level 1, Form<br>Title/abstract<br>screen |
| 2832 | <b>Marta Meana, Sheri D. Pruitt, Timothy R. Dresselhaus.</b> Opioid therapy for chronic pancreatitis: Controlling aberrant use through behavioral management.. <i>General Hospital Psychiatry.</i> 1999/03//Mar-Apr, 1999. 21:137                                                                                                                                                                                                                                                                                                                                | Level 1, Form<br>Title/abstract<br>screen |
| 2836 | <b>Joan S. Doyle, David Stoop.</b> Witness and victim of multiple abuses: Case of Randy, age 10, in a residential treatment center, and follow-up at age 19 in prison.. <i>Play therapy with children in crisis: Individual, group, and family treatment..</i> 1999///. #volume#:131                                                                                                                                                                                                                                                                             | Level 1, Form<br>Title/abstract<br>screen |
| 2837 | <b>Lawrence D. Rickards, Walter Leginski, Frances L. Randolph, Deidre Oakley, James M. Herrell, Cheryl Gallagher.</b> Cooperative agreements for CMHS/CSAT collaborative program to prevent homelessness: An overview.. <i>Alcoholism Treatment Quarterly.</i> 1999///. 17:1                                                                                                                                                                                                                                                                                     | Level 1, Form<br>Title/abstract<br>screen |
| 2839 | <b>Lauren Lawendowski Aubrey.</b> Motivational interviewing with adolescents presenting for outpatient substance abuse treatment.. <i>Dissertation Abstracts International: Section B: The Sciences and Engineering.</i> 1998/09//. 59:1357                                                                                                                                                                                                                                                                                                                      | Level 2, Form<br>Full Text<br>Screening   |
| 2840 | <b>Gary Marc Diamond.</b> Therapist alliance building techniques with adolescents in family therapy.. <i>Dissertation Abstracts International: Section B: The Sciences and Engineering.</i> 1998/04//. 58:5640                                                                                                                                                                                                                                                                                                                                                   | Level 2, Form<br>Full Text<br>Screening   |
| 2841 | <b>Lisa M. Najavits, David R. Gastfriend, Jacques P. Barber, Sharon Reif, Larry R. Muenz, Jack Blaine, Arlene Frank, Paul Crits-Christoph, Michael Thase, Roger D. Weiss.</b> Cocaine dependence with and without PTSD among subjects in the National Institute on Drug Abuse Collaborative Cocaine Treatment Study.. <i>The American Journal of Psychiatry.</i> 1998/02//. 155:214                                                                                                                                                                              | Level 1, Form<br>Title/abstract<br>screen |
| 2842 | <b>Myrna M. Weissman, John C. Markowitz.</b> An overview of interpersonal psychotherapy.. <i>Interpersonal psychotherapy..</i> 1998///. #volume#:1                                                                                                                                                                                                                                                                                                                                                                                                               | Level 1, Form<br>Title/abstract<br>screen |
| 2843 | <b>Laura Mufson, Donna Moreau.</b> Interpersonal psychotherapy for adolescent depression.. <i>Interpersonal psychotherapy..</i> 1998///. #volume#:35                                                                                                                                                                                                                                                                                                                                                                                                             | Level 1, Form<br>Title/abstract<br>screen |
| 2844 | <b>Robert D. Margolis, Joan E. Zweben.</b> Determining Appropriate Treatment: The Collaborative Challenge.. <i>Treating patients with alcohol and other drug problems: An integrated approach..</i> 1998///. #volume#:145                                                                                                                                                                                                                                                                                                                                        | Level 2, Form<br>Full Text<br>Screening   |



|      |                                                                                                                                                                                                                                                                                                                                                                                                                                                                                                                                               |                                           |
|------|-----------------------------------------------------------------------------------------------------------------------------------------------------------------------------------------------------------------------------------------------------------------------------------------------------------------------------------------------------------------------------------------------------------------------------------------------------------------------------------------------------------------------------------------------|-------------------------------------------|
| 2845 | <b>Rudolf H. Moos, Bernice S. Moos.</b> The staff workplace and the quality and outcome of substance abuse treatment.. <i>Journal of Studies on Alcohol</i> . 1998/01//. 59:43                                                                                                                                                                                                                                                                                                                                                                | Level 1, Form<br>Title/abstract<br>screen |
| 2846 | <b>Jacques P. Barber, Ilana Krakauer, Naomi Calvo, Peter C. Badgio.</b> Measuring adherence and competence of dynamic therapists in the treatment of cocaine dependence.. <i>Journal of Psychotherapy Practice &amp; Research</i> . 1997//Win 1997. 6:12                                                                                                                                                                                                                                                                                      | Level 1, Form<br>Title/abstract<br>screen |
| 2848 | <b>M. Soyka, C. Kirchmayer, G. Kotter, C. John, E. Löhnert, H. -J. Möller.</b> Neue Möglichkeiten der Therapie und Rehabilitation alkohol-abhängiger Patienten. Katamnestiche Untersuchung zur Effizienz ambulanter Entwöhnungstherapien am Beispiel einer Modelleinrichtung. = New possibilities of treatment and rehabilitation of alcohol-dependent patients. Catamnestic study on the efficacy of outpatient treatment programmes demonstrated by a model procedure.. <i>Fortschritte der Neurologie, Psychiatrie</i> . 1997/09//. 65:407 | Level 1, Form<br>Title/abstract<br>screen |
| 2849 | <b>Paul Crits-Christoph, Lynne Siqueland, Jack Blaine, Arlene Frank, Lester Luborsky, Lisa Simon Onken, Larry Muenz, Michael E. Thase, Roger D. Weiss, David R. Gastfriend, George Woody, Jacques P. Barber, Stephen F. Butler, Dennis Daley, Sarah Bishop, Lisa M. Najavits, Judy Lis, Delinda Mercer, Margaret L. Griffin, Karla Moras, Aaron T. Beck.</b> The National Institute on Drug Abuse Collaborative Cocaine Treatment Study: Rationale and methods.. <i>Archives of General Psychiatry</i> . 1997/08//. 54:721                    | Level 1, Form<br>Title/abstract<br>screen |
| 2850 | <b>John Lilja, Sam Larsson, David Hamilton.</b> Toward a theory of social pharmacology: The actor-spectator paradox applied to the psychotropic prescribing process.. <i>Substance Use &amp; Misuse</i> . 1997/07//. 32:1175                                                                                                                                                                                                                                                                                                                  | Level 1, Form<br>Title/abstract<br>screen |
| 2851 | <b>Roger D. Weiss, Margaret L. Griffin, Cathryn Hufford, Larry R. Muenz, Lisa M. Najavits, Stephanie B. Jansson, Julia Kogan, Heather J. Thompson.</b> Early prediction of initiation of abstinence from cocaine: Use of a craving questionnaire.. <i>The American Journal on Addictions</i> . 1997//Sum 1997. 6:224                                                                                                                                                                                                                          | Level 1, Form<br>Title/abstract<br>screen |
| 2853 | <b>A. E. Eyler, Laurie L. Dicken, J. T. Fitzgerald, Mary S. Oh, Fredric M. Wolf, Andrew J. Zweifler.</b> Teaching smoking-cessation counseling to medical students using simulated patients.. <i>American Journal of Preventive Medicine</i> . 1997/05//May-Jun, 1997. 13:153                                                                                                                                                                                                                                                                 | Level 1, Form<br>Title/abstract<br>screen |
| 2854 | <b>Agneta Öjehagen, Mats Berglund, Lars Hansson.</b> The relationship between helping alliance and outcome in outpatient treatment of alcoholics: A comparative study of psychiatric treatment and multimodal behavioural therapy.. <i>Alcohol and Alcoholism</i> . 1997/05//May-Jun, 1997. 32:241                                                                                                                                                                                                                                            | Level 1, Form<br>Title/abstract<br>screen |
| 2855 | <b>Jerry A. Morris, James G. Hill.</b> Rural hospital addictions screening and treatment.. <i>Practicing psychology in rural settings: Hospital privileges and collaborative care</i> .. 1997//. #volume#:127                                                                                                                                                                                                                                                                                                                                 | Level 1, Form<br>Title/abstract<br>screen |
| 2856 | <b>Juan José Sánchez Sosa, Laura Hernández Guzmán, Lorena Romero M.</b> Predictores psicosociales del fracaso conyugal: Un estudio exploratorio. = Psychosocial predictors of marital distress: An exploratory study.. <i>Archivos Hispanoamericanos de Sexología</i> . 1997//. 3:125                                                                                                                                                                                                                                                         | Level 1, Form<br>Title/abstract<br>screen |
| 2857 | <b>Ray Dean.</b> Tyrannosaurus therapy: How to avoid emotional extinction.. #journal#. 1997//. #volume#: #pages#                                                                                                                                                                                                                                                                                                                                                                                                                              | Level 1, Form<br>Title/abstract<br>screen |
| 2858 | <b>Roger D. Weiss, Margaret L. Griffin, Lisa M. Najavits, Cathryn Hufford, Julia Kogan, Heather J. Thompson, Joseph H. Albeck, Sarah Bishop,</b>                                                                                                                                                                                                                                                                                                                                                                                              | Level 1, Form<br>Title/abstract           |

|      |                                                                                                                                                                                                                                                                                  |                                           |
|------|----------------------------------------------------------------------------------------------------------------------------------------------------------------------------------------------------------------------------------------------------------------------------------|-------------------------------------------|
|      | <b>Dennis C. Daley, Delinda Mercer, Lynne Siqueland.</b> Self-help activities in cocaine dependent patients entering treatment: Results from the NIDA collaborative cocaine treatment study.. <i>Drug and Alcohol Dependence</i> . 1996/12//. 43:79                              | screen                                    |
| 2862 | <b>Kate B. Carey.</b> Substance use reduction in the context of outpatient psychiatric treatment: A collaborative, motivational, harm reduction approach.. <i>Community Mental Health Journal</i> . 1996/06//. 32:291                                                            | Level 1, Form<br>Title/abstract<br>screen |
| 2864 | <b>Martha Morrison Dore, Leslie B. Alexander.</b> Preserving families at risk of child abuse and neglect: The role of the helping alliance.. <i>Child Abuse &amp; Neglect</i> . 1996/04//. 20:349                                                                                | Level 1, Form<br>Title/abstract<br>screen |
| 2866 | <b>Gerald L. Vidgal, Donald W. Stadler.</b> Assessment, client treatment matching, and managing the substance abusing offender.. <i>Drug treatment behind bars: Prison-based strategies for change</i> .. 1996//. #volume#:17                                                    | Level 1, Form<br>Title/abstract<br>screen |
| 2868 | <b>Frances A. Stillman.</b> Tobacco control and smoking cessation efforts in an inner-city African American community.. <i>Journal of Social Distress &amp; the Homeless</i> . 1996/01//. 5:55                                                                                   | Level 1, Form<br>Title/abstract<br>screen |
| 2870 | <b>Terri Gullickson.</b> Review of Addictions Treatment for Older Adults: Evaluation of an Innovative Client-Centered Approach.. <i>Contemporary Psychology</i> . 1995/11//. 40:1115                                                                                             | Level 1, Form<br>Title/abstract<br>screen |
| 2871 | <b>Helen Stephanie Raytek.</b> If you build it, they will come: Therapeutic alliance and the retention of couples in conjoint alcoholism treatment.. <i>Dissertation Abstracts International: Section B: The Sciences and Engineering</i> . 1995/11//. 56:2881                   | Level 2, Form<br>Full Text<br>Screening   |
| 2872 | <b>James H. Bray, John C. Rogers.</b> Linking psychologists and family physicians for collaborative practice.. <i>Professional Psychology: Research and Practice</i> . 1995/04//. 26:132                                                                                         | Level 1, Form<br>Title/abstract<br>screen |
| 2873 | <b>Jacques Morgan Ama Okonji.</b> Counseling style preference and perception of counselors by African American male students.. <i>Dissertation Abstracts International: Section B: The Sciences and Engineering</i> . 1995/03//. 55:3811                                         | Level 1, Form<br>Title/abstract<br>screen |
| 2874 | <b>Robert B. Jr. Rutherford, Mary Magee Quinn.</b> Establishing Effective Collaboration in the Schools.. <i>Contemporary Psychology</i> . 1995/02//. 40:132                                                                                                                      | Level 1, Form<br>Title/abstract<br>screen |
| 2875 | <b>Jay Fagan, Howard Stevenson.</b> Men as teachers: A self-help program on parenting for African American men.. <i>Social Work with Groups: A Journal of Community and Clinical Practice</i> . 1995//. 17:29                                                                    | Level 1, Form<br>Title/abstract<br>screen |
| 2876 | <b>Kathryn Marie Graham, Sarah J. Saunders, Margaret C. Flower, Carol Birchmore Timney, Marilyn White-Campbell, Anne Zeidman Pietropaolo.</b> Addictions treatment for older adults: Evaluation of an innovative client-centered approach.. #journal#. 1995//. #volume#: #pages# | Level 2, Form<br>Full Text<br>Screening   |
| 2877 | <b>Richard Longabaugh, Philip W. Wirtz, Carlo C. DiClemente, Mark Litt.</b> Issues in the development of client-treatment matching hypotheses.. <i>Journal of Studies on Alcohol</i> . 1994/12//. Suppl 12:46                                                                    | Level 1, Form<br>Title/abstract<br>screen |
| 2878 | <b>Neil B. Colan, Katherine C. Mague, Ronna S. Cohen, Robert J. Schneider.</b> Family education in the workplace: A prevention program for working parents and school-age children.. <i>The Journal of Primary Prevention</i> . 1994//Win 1994. 15:161                           | Level 1, Form<br>Title/abstract<br>screen |
| 2879 | <b>Eleanor J. Sullivan, Sandra M. Handley, Helen Connors.</b> The role of nurses in primary care: Managing alcohol-abusing patients.. <i>Alcohol Health &amp; Research World</i> . 1994//. 18:158                                                                                | Level 2, Form<br>Full Text<br>Screening   |

|      |                                                                                                                                                                                                                                                                                            |                                     |
|------|--------------------------------------------------------------------------------------------------------------------------------------------------------------------------------------------------------------------------------------------------------------------------------------------|-------------------------------------|
| 2880 | <b>James L. Sorensen, Joan E. Zweben.</b> Psychosocial treatment of the addictions: Problems in specific populations.. <i>Psychology of Addictive Behaviors</i> . 1993/09//. 7:147                                                                                                         | Level 1, Form Title/abstract screen |
| 2881 | <b>M. Dawn Terrell.</b> Ethnocultural factors and substance abuse: Toward culturally sensitive treatment models.. <i>Psychology of Addictive Behaviors</i> . 1993/09//. 7:162                                                                                                              | Level 2, Form Full Text Screening   |
| 2882 | <b>Mark Olfson.</b> The array of psychiatric services in general hospitals.. <i>General Hospital Psychiatry</i> . 1993/09//. 15:277                                                                                                                                                        | Level 1, Form Title/abstract screen |
| 2884 | <b>Raymond Sanchez Mayers, Federico Jr. Souflee, Carann Simpson Feazell.</b> Prevention and treatment of Hispanic substance abuse: A workplace perspective.. <i>Hispanic substance abuse</i> .. 1993///. #volume#:175                                                                      | Level 1, Form Title/abstract screen |
| 2885 | <b>Allen Zweben, David Barrett.</b> Brief couples treatment for alcohol problems.. <i>Treating alcohol problems: Marital and family interventions</i> .. 1993///. #volume#:353                                                                                                             | Level 1, Form Title/abstract screen |
| 2887 | <b>Jaime Inclan, Miguel Hernandez.</b> Cross-cultural perspectives and codependence: The case of poor Hispanics.. <i>American Journal of Orthopsychiatry</i> . 1992/04//. 62:245                                                                                                           | Level 1, Form Title/abstract screen |
| 2890 | <b>John B. Peachey, J. Spencer Madden, D. Adrian Wilkinson, Martha Sanchez-Craig, Charles P. O'Brien, Anna Rose Childress, George E. Vaillant, D. Colin Drummond, W. Falkowski.</b> Therapeutic skills.. <i>The international handbook of addiction behaviour</i> .. 1991///. #volume#:207 | Level 1, Form Title/abstract screen |
| 2891 | <b>Carole L. Donovan.</b> Factors predisposing, enabling and reinforcing routine screening of patients for preventing fetal alcohol syndrome: A survey of New Jersey physicians.. <i>Journal of Drug Education</i> . 1991///. 21:35                                                        | Level 1, Form Title/abstract screen |
| 2892 | <b>Patrick B. Johnson.</b> Review of Alcoholism in minority populations.. <i>Psychology of Addictive Behaviors</i> . 1991///. 5:97                                                                                                                                                         | Level 1, Form Title/abstract screen |
| 2893 | <b>Alice S. Honig, Annette E. Pfannenstiel.</b> Difficulties in reaching low-income new fathers: Issues and cases.. <i>Early Child Development and Care</i> . 1991///. 77:115                                                                                                              | Level 1, Form Title/abstract screen |
| 2894 | <b>Christine M. Nezu, Arthur M. Nezu, Patricia Arean.</b> Assertiveness and problem-solving training for mildly mentally retarded persons with dual diagnoses.. <i>Research in Developmental Disabilities</i> . 1991///. 12:371                                                            | Level 1, Form Title/abstract screen |
| 2895 | <b>L. F. Lowenstein.</b> The peer group promoting socialised behaviour: How can the peer group be mobilised to counteract and remedy negative behaviour?. <i>Education Today</i> . 1989///. 39:27                                                                                          | Level 1, Form Title/abstract screen |
| 2896 | <b>Kaj Noschis.</b> Testing a self-help instrument with early-risk alcohol consumers in general practice: A progress report.. <i>Contemporary Drug Problems: An Interdisciplinary Quarterly</i> . 1988///Fal 1988. 15:365                                                                  | Level 1, Form Title/abstract screen |
| 2898 | <b>M. D. Jackson, Duane Brown.</b> Use of Systematic Training for Effective Parenting (STEP) with elementary school parents.. <i>School Counselor</i> . 1986/11//. 34:100                                                                                                                  | Level 1, Form Title/abstract screen |
| 2901 | <b>Robert Q. Dana.</b> Pretreatment assertion levels as they relate to treatment outcome in an alcohol abusing sample.. <i>Dissertation Abstracts International</i> . 1985/09//. 46:956                                                                                                    | Level 1, Form Title/abstract screen |
| 2903 | <b>Joseph Westermeyer, John Neider.</b> Cultural affiliation among American Indian alcoholics: Correlations and change over a ten year period.. <i>Journal of</i>                                                                                                                          | Level 1, Form Title/abstract        |

|      |                                                                                                                                                                                                                                                                                            |                                           |
|------|--------------------------------------------------------------------------------------------------------------------------------------------------------------------------------------------------------------------------------------------------------------------------------------------|-------------------------------------------|
|      | <i>Operational Psychiatry</i> . 1985///. 16:17                                                                                                                                                                                                                                             | screen                                    |
| 2904 | <b>Paul A. Mider</b> . Patient–treatment interaction: Person versus thing centeredness of addicts in methadone and drug-free approaches.. <i>International Journal of the Addictions</i> . 1985///. 20:1191                                                                                | Level 1, Form<br>Title/abstract<br>screen |
| 2905 | <b>John Rogers, Margaret Durkin</b> . The semi-structured genogram interview. I: Protocol. II: Evaluation.. <i>Family Systems Medicine</i> . 1984///Sum 1984. 2:176                                                                                                                        | Level 1, Form<br>Title/abstract<br>screen |
| 2906 | <b>M. Keith Langley</b> . Post-traumatic stress disorders among Vietnam combat veterans.. <i>Social Casework</i> . 1982/12//. 63:593                                                                                                                                                       | Level 1, Form<br>Title/abstract<br>screen |
| 2907 | <b>Kenneth M. Ralph</b> . Asserting rights: A seductive option.. <i>Personnel &amp; Guidance Journal</i> . 1982/01//. 60:328                                                                                                                                                               | Level 1, Form<br>Title/abstract<br>screen |
| 2908 | <b>David M. McElroy</b> . A modified marathon with voluntarily institutionalized substance abusers: Effects on psychopathology, self-actualization and ward behavior.. <i>Dissertation Abstracts International</i> . 1976/05//. 36:7213                                                    | Level 1, Form<br>Title/abstract<br>screen |
| 2909 | <b>George de Leon, D. Vincent Biase</b> . Encounter group: Measurement of systolic blood pressure.. <i>Psychological Reports</i> . 1975/10//. 37:439                                                                                                                                       | Level 1, Form<br>Title/abstract<br>screen |
| 2910 | <b>Peter W. Bradshaw</b> . The problem of cigarette smoking and its control.. <i>International Journal of the Addictions</i> . 1973///. 8:353                                                                                                                                              | Level 1, Form<br>Title/abstract<br>screen |
| 2911 | . Medical school education on abuse of alcohol and other psychoactive drugs.. <i>JAMA: Journal of the American Medical Association</i> . 1972/03//. 219:1746                                                                                                                               | Level 1, Form<br>Title/abstract<br>screen |
| 2912 | <b>Laney K. Jones, Rebecca Pulk, Michael R. Gionfriddo, Michael A. Evans, Dean Parry</b> . Utilizing big data to provide better health at lower cost.. <i>American Journal of Health-System Pharmacy</i> . 2018/04//4/1/2018. 75:427                                                       | Level 1, Form<br>Title/abstract<br>screen |
| 2915 | <b>Corinne Ann Coppinger</b> . Collaborative care in a rural setting for a pregnant woman with heroin addiction.. <i>Women's Healthcare: A Clinical Journal for NPs</i> . 2017/02//. 5:28                                                                                                  | Level 2, Form<br>Full Text<br>Screening   |
| 2916 | <b>Henk Den Ouden, Rimke C. Vos, Guy E. H. M. Rutten</b> . Effectiveness of shared goal setting and decision making to achieve treatment targets in type 2 diabetes patients: A cluster-randomized trial ( OPTIMAL).. <i>Health Expectations</i> . 2017/10//. 20:1172                      | Level 1, Form<br>Title/abstract<br>screen |
| 2917 | <b>Susan C. Walley, Grant M. Mussman, Michele Lossius, Kristin A. Shadman, Lauren Destino, Matthew Garber, Shawn L. Ralston</b> . Implementing Parental Tobacco Dependence Treatment Within Bronchiolitis QI Collaboratives.. <i>Pediatrics</i> . 2018/06//. 141:1                         | Level 1, Form<br>Title/abstract<br>screen |
| 2918 | <b>Ilene A. Claudius, Shoma Desai, Ebony Davis, Sean Henderson</b> . Case-controlled Analysis of Patient-based Risk Factors for Assault in the Healthcare Workplace.. <i>Western Journal of Emergency Medicine: Integrating Emergency Care with Population Health</i> . 2017/10//. 18:1153 | Level 1, Form<br>Title/abstract<br>screen |
| 2919 | <b>Daniel L. Hall, Inga T. Lennes, Alaina Carr, Justin R. Eusebio, Gloria Y. Yeh, Elyse R. Park</b> . Lung Cancer Screening Uncertainty among Patients Undergoing LDCT.. <i>American Journal of Health Behavior</i> . 2018/01//Jan/Feb2018. 42:69                                          | Level 1, Form<br>Title/abstract<br>screen |
| 2920 | <b>Jessica L. Norman, Miranda E. Kroehl, Huong Mindy Lam, Carmen L. Lewis, Chelsea N. Mitchell, Cindy L. O'Bryant, Katy E. Trinkley</b> .                                                                                                                                                  | Level 1, Form<br>Title/abstract           |

|      |                                                                                                                                                                                                                                                                                                                                                  |                                     |
|------|--------------------------------------------------------------------------------------------------------------------------------------------------------------------------------------------------------------------------------------------------------------------------------------------------------------------------------------------------|-------------------------------------|
|      | Implementation of a pharmacist-managed clinic for patients with chronic nonmalignant pain.. <i>American Journal of Health-System Pharmacy</i> . 2017/08/15/. 74:1229                                                                                                                                                                             | screen                              |
| 2922 | <b>Felicity A. E. Homsted, Chelsea E. Magee, Noah Nesin.</b> Population health management in a small health system: Impact of controlled substance stewardship in a patient-centered medical home.. <i>American Journal of Health-System Pharmacy</i> . 2017/09/15/. 74:1468                                                                     | Level 1, Form Title/abstract screen |
| 2927 | <b>Anna E. Austin, Meghan E. Shanahan.</b> Association of childhood abuse and neglect with prescription opioid misuse: Examination of mediation by adolescent depressive symptoms and pain.. <i>Children &amp; Youth Services Review</i> . 2018/02//. 86:84                                                                                      | Level 1, Form Title/abstract screen |
| 2929 | <b>Glenn Albright, Craig Bryan, Cyrille Adam, Jeremiah McMillan, Kristen Shockley.</b> Using Virtual Patient Simulations to Prepare Primary Health Care Professionals to Conduct Substance Use and Mental Health Screening and Brief Intervention.. <i>Journal of the American Psychiatric Nurses Association</i> . 2018/05//May/Jun2018. 24:247 | Level 1, Form Title/abstract screen |
| 2940 | <b>BEVERLEY BOSTOCK COX.</b> Asthma-COPD overlap: diagnosis and management.. <i>Practice Nurse</i> . 2018/03//. 48:14                                                                                                                                                                                                                            | Level 1, Form Title/abstract screen |
| 2941 | <b>Ashley Tewksbury, Kevin M. Bozymiski, Laura Ruekert, Cheen Lum, Elizabeth Cunningham, Frank Covington.</b> Development of Collaborative Drug Therapy Management and Clinical Pharmacy Services in an Outpatient Psychiatric Clinic.. <i>Journal of Pharmacy Practice</i> . 2018/06//. 31:272                                                  | Level 1, Form Title/abstract screen |
| 2942 | <b>Cheyenne Newsome, Leslie Colip, Nathaniel Sharon, Jessica Conklin.</b> Incorporating a pharmacist into an interprofessional team providing transgender care under a medical home model.. <i>American Journal of Health-System Pharmacy</i> . 2017/02//2/1/2017. 74:135                                                                        | Level 1, Form Title/abstract screen |
| 2943 | <b>Margaret B. Nolan, Katherine E. Kemper, Thomas J. Glynn, Richard D. Hurt, J. Taylor Hays.</b> Tobacco Dependence Treatment Grants: A Collaborative Approach to the Implementation of WHO Tobacco Control Initiatives.. <i>Journal of Environmental &amp; Public Health</i> . 2018/03/22/. #volume#:1                                          | Level 1, Form Title/abstract screen |
| 2944 | <b>Lili Li, Shimin Zhu, Nick Tse, Samson Tse, Paul Wong.</b> Effectiveness of motivational interviewing to reduce illicit drug use in adolescents: a systematic review and meta-analysis.. <i>Addiction</i> . 2016/05//. 111:795                                                                                                                 | Level 1, Form Title/abstract screen |
| 2946 | <b>John D. Cramer, Brad Wisler, Christopher J. Gouveia.</b> Opioid Stewardship in Otolaryngology: State of the Art Review.. <i>Otolaryngology-Head &amp; Neck Surgery</i> . 2018/05//. 158:817                                                                                                                                                   | Level 1, Form Title/abstract screen |
| 2947 | <b>Michele C. Walsh, Moira Crowley, Scott Wexelblatt, Susan Ford, Pierce Kuhnell, Heather C. Kaplan, Richard McClead, Maurizio Macaluso, Carole Lannon.</b> Ohio Perinatal Quality Collaborative Improves Care of Neonatal Narcotic Abstinence Syndrome.. <i>Pediatrics</i> . 2018/04//. 141:1                                                   | Level 1, Form Title/abstract screen |
| 2952 | <b>Leontine van der Meer, Anna Petra Nieboer, Harry Finkenflügel, Jane Murray Cramm.</b> The importance of person-centred care and co-creation of care for the well-being and job satisfaction of professionals working with people with intellectual disabilities.. <i>Scandinavian Journal of Caring Sciences</i> . 2018/03//. 32:76           | Level 1, Form Title/abstract screen |
| 2953 | <b>Veronica L. Ford.</b> Measuring Patient Satisfaction in New Mothers with Substance Use Disorders: A Correlative Investigation.. <i>Health Science Journal</i> . 2016/10//. 10:1                                                                                                                                                               | Level 1, Form Title/abstract screen |

|      |                                                                                                                                                                                                                                                                                                                                                                                                                                                                                                                                       |                                           |
|------|---------------------------------------------------------------------------------------------------------------------------------------------------------------------------------------------------------------------------------------------------------------------------------------------------------------------------------------------------------------------------------------------------------------------------------------------------------------------------------------------------------------------------------------|-------------------------------------------|
| 2956 | . Bibliography.. <i>Progress in Palliative Care</i> . 2018/06//. 26:148                                                                                                                                                                                                                                                                                                                                                                                                                                                               | Level 1, Form<br>Title/abstract<br>screen |
| 2957 | <b>Christina Powers, Megan Comfort, Andrea M. Lopez, Alex H. Kral, Owen Murdoch, Jennifer Lorvick.</b> Addressing Structural Barriers to HIV Care among Triply Diagnosed Adults: Project Bridge Oakland.. <i>Health &amp; Social Work</i> . 2017/05//. 42:e53                                                                                                                                                                                                                                                                         | Level 1, Form<br>Title/abstract<br>screen |
| 2960 | <b>Jeanne E. Savage, Jessica E. Salvatore, Fazil Aliev, Alexis C. Edwards, Matthew Hickman, Kenneth S. Kendler, John Macleod, Antti Latvala, Anu Loukola, Jaakko Kaprio, Richard J. Rose, Grace Chan, Victor Hesselbrock, Bradley T. Webb, Amy Adkins, Tim B. Bigdeli, Brien P. Riley, Danielle M. Dick.</b> Polygenic Risk Score Prediction of Alcohol Dependence Symptoms Across Population-Based and Clinically Ascertained Samples.. <i>Alcoholism: Clinical &amp; Experimental Research</i> . 2018/03//. 42:520                  | Level 1, Form<br>Title/abstract<br>screen |
| 2962 | <b>Marie A. Fioravanti, Holly Hagle, Kathy Puskar, Emily Knapp, Irene Kane, Dawn Lindsay, Lauren Terhorst, Ann M. Mitchell.</b> Creative Learning Through the Use of Simulation to Teach Nursing Students Screening, Brief Intervention, and Referral to Treatment for Alcohol and Other Drug Use in a Culturally Competent Manner.. <i>Journal of Transcultural Nursing</i> . 2018/07//. 29:387                                                                                                                                      | Level 1, Form<br>Title/abstract<br>screen |
| 2963 | <b>Guido Mannaioni, Cecilia Lanzi, Michela Lotti, Valentina Galli, Arianna Totti, Ilaria Pacileo, Maria Sili, Chiara Pracucci, Arianna Dilaghi, Lara Bertieri, Mariarita Quaranta, Francesco Orsini, Brunella Occupati, Assia Michahelles, Riccardo Ciuti, Elisa Bianchini, Giancarlo Fabbro, Annibale Biggeri, Emanuela Masini, Flavio Moroni.</b> Methadone Dose Adjustments, Plasma R-Methadone Levels and Therapeutic Outcome of Heroin Users: A Randomized Clinical Trial.. <i>European Addiction Research</i> . 2018/03//. 24:9 | Level 1, Form<br>Title/abstract<br>screen |
| 2964 | <b>Mickey Sperlich, Julia S. Seng, Yang Li, Julie Taylor, Caroline Bradbury-Jones.</b> Integrating Trauma-Informed Care Into Maternity Care Practice: Conceptual and Practical Issues.. <i>Journal of Midwifery &amp; Women's Health</i> . 2017/11//Nov/Dec2017. 62:661                                                                                                                                                                                                                                                               | Level 1, Form<br>Title/abstract<br>screen |
| 2965 | <b>Sadaaki Fukui, Michelle P. Salyers, Charlie Rapp, Richard Goscha, Leslie Young, Ally Mabry.</b> Supporting shared decision making beyond consumer-prescriber interactions: Initial development of the CommonGround fidelity scale.. <i>American Journal of Psychiatric Rehabilitation</i> . 2016/07//Jul-Sep2016. 19:252                                                                                                                                                                                                           | Level 1, Form<br>Title/abstract<br>screen |
| 2967 | <b>Deborah Rigby.</b> The Case For.. <i>Journal of Pharmacy Practice &amp; Research</i> . 2018/06//. 48:280                                                                                                                                                                                                                                                                                                                                                                                                                           | Level 1, Form<br>Title/abstract<br>screen |
| 2969 | <b>KENT MOORE, BARBARA HAYS.</b> Coding Changes for Family Medicine in 2018.. <i>Family Practice Management</i> . 2018/01//Jan/Feb2018. 25:5                                                                                                                                                                                                                                                                                                                                                                                          | Level 1, Form<br>Title/abstract<br>screen |
| 2970 | <b>Bill Reddy.</b> COMBATING DRUG ADDICTION & THE OPIOID CRISIS: AN ANALYSIS.. <i>Acupuncture Today</i> . 2018/02//. 19:1                                                                                                                                                                                                                                                                                                                                                                                                             | Level 1, Form<br>Title/abstract<br>screen |
| 2974 | <b>Nicky Bundy.</b> The care programme approach and the politics of 'personality disorder'.. <i>Mental Health Practice</i> . 2017/07//. 20:32                                                                                                                                                                                                                                                                                                                                                                                         | Level 1, Form<br>Title/abstract<br>screen |
| 2975 | <b>GARY A. ENOS.</b> A lesson in LANGUAGE.. <i>Addiction Professional</i> . 2017///Spring2017. 15:10                                                                                                                                                                                                                                                                                                                                                                                                                                  | Level 1, Form<br>Title/abstract           |

|      |                                                                                                                                                                                                                                                                                                                                          |                                           |
|------|------------------------------------------------------------------------------------------------------------------------------------------------------------------------------------------------------------------------------------------------------------------------------------------------------------------------------------------|-------------------------------------------|
|      |                                                                                                                                                                                                                                                                                                                                          | screen                                    |
| 2977 | <b>Naweed I. Chowdhury, Jess C. Mace, Timothy L. Smith, Luke Rudmik.</b> What drives productivity loss in chronic rhinosinusitis? A SNOT-22 subdomain analysis.. <i>Laryngoscope</i> . 2018/01//. 128:23                                                                                                                                 | Level 1, Form<br>Title/abstract<br>screen |
| 2981 | <b>Anthony Estreet, Paul Archibald, M. Taqi Tirmazi, Sapphire Goodman, Tracy Cudjoe.</b> Exploring social work student education: The effect of a harm reduction curriculum on student knowledge and attitudes regarding opioid use disorders.. <i>Substance Abuse</i> . 2017/10//Oct-Dec2017. 38:369                                    | Level 1, Form<br>Title/abstract<br>screen |
| 2982 | <b>Lisa Carter-Harris, Duy Khanh Pham Ceppa, Nasser Hanna, Susan M. Rawl.</b> Lung cancer screening: what do long-term smokers know and believe?. <i>Health Expectations</i> . 2017/02//. 20:59                                                                                                                                          | Level 1, Form<br>Title/abstract<br>screen |
| 2983 | <b>Kathryn R. Puskar, Heeyoung Lee, Ann M. Mitchell, Irene Kane, Susan A. Albrecht, Linda Rose Frank, Holly Hagle, Dawn L. Lindsay, Martin P. Houze.</b> Interprofessional Collaborative Education for Substance Use Screening: Rural Areas and Challenges.. <i>Online Journal of Rural Nursing &amp; Health Care</i> . 2016/01//. 16:76 | Level 1, Form<br>Title/abstract<br>screen |
| 2985 | <b>Rebekah Blowers.</b> MILITARY VETERANS AND MASSAGE THERAPY.. <i>Massage Therapy Journal</i> . 2018///Spring2018. 57:51                                                                                                                                                                                                                | Level 1, Form<br>Title/abstract<br>screen |
| 2987 | <b>Rhona Reardon, Sarah Grogan.</b> Talking about smoking cessation with pregnant women: Exploring midwives' accounts.. <i>British Journal of Midwifery</i> . 2016/01//. 24:38                                                                                                                                                           | Level 2, Form<br>Full Text<br>Screening   |
| 2988 | <b>Kristoffer Nordheim, Espen Walderhaug, Ståle Alstadius, Ann Kern-Godal, Espen Arnevik, Fanny Duckert.</b> Young adults' reasons for dropout from residential substance use disorder treatment.. <i>Qualitative Social Work</i> . 2018/01//. 17:24                                                                                     | Level 1, Form<br>Title/abstract<br>screen |
| 2989 | <b>Guilhème Pérodeau, Émilie Grenon, Sébastien Grenier, Kieron O'Connor.</b> Systemic model of chronic benzodiazepine use among mature adults.. <i>Aging &amp; Mental Health</i> . 2016/04//. 20:380                                                                                                                                     | Level 1, Form<br>Title/abstract<br>screen |
| 2990 | <b>Laurie Knis Matthews, Claire M. Mulry, Lynne Richard.</b> Matthews Model of Clinical Reasoning: A Systematic Approach to Conceptualize Evaluation and Intervention.. <i>Occupational Therapy in Mental Health</i> . 2017/10//Oct-Dec2017. 33:360                                                                                      | Level 1, Form<br>Title/abstract<br>screen |
| 2991 | <b>Alison Knopf.</b> Pharmacies and buprenorphine prescribing: Team effort.. <i>Alcoholism &amp; Drug Abuse Weekly</i> . 2018/04/16/. 30:3                                                                                                                                                                                               | Level 1, Form<br>Title/abstract<br>screen |
| 2992 | <b>Julie Edwards, Jenna Butner.</b> ADOLESCENCE AND ALCOHOL USE DISORDERS.. <i>Family Doctor: A Journal of the New York State Academy of Family Physicians</i> . 2017///Winter2017. 5:22                                                                                                                                                 | Level 1, Form<br>Title/abstract<br>screen |
| 2994 | <b>Jillian Ireland, Ruth Evans, Rachel Buisson-Lex.</b> 'Bump, Baby and Beyond': Participant-led antenatal sessions using creative collaboration.. <i>British Journal of Midwifery</i> . 2016/09//. 24:650                                                                                                                               | Level 1, Form<br>Title/abstract<br>screen |
| 2995 | <b>Elizabeth Mollard, Diane Brage Hudson.</b> Nurse-Led Trauma-Informed Correctional Care for Women.. <i>Perspectives in Psychiatric Care</i> . 2016/07//. 52:224                                                                                                                                                                        | Level 1, Form<br>Title/abstract<br>screen |
| 2997 | <b>Sarah Carter Narendorf.</b> Intersection of homelessness and mental health: A mixed methods study of young adults who accessed psychiatric emergency services.. <i>Children &amp; Youth Services Review</i> . 2017/10//. 81:54                                                                                                        | Level 1, Form<br>Title/abstract<br>screen |

|      |                                                                                                                                                                                                                                                                                                                                     |                                           |
|------|-------------------------------------------------------------------------------------------------------------------------------------------------------------------------------------------------------------------------------------------------------------------------------------------------------------------------------------|-------------------------------------------|
| 3001 | <b>Christine Baker, Marianna Bruno, Laura Grant, Chloe Johnson, Bryan Bennett, Elaine Brohan, Birol Emir, Christine L Baker.</b> Content Validity of a Willingness to Quit Tool for Use with Current Smokers in Clinical Practice.. <i>Advances in Therapy</i> . 2017/10//. 34:2295                                                 | Level 1, Form<br>Title/abstract<br>screen |
| 3003 | <b>Alain H. Romanos, Ramzi V. Abou-Arraj, Stephanie E. Cruz, Zeina A. K. Majzoub.</b> Clinical and Patient-Centered Outcomes Following Treatment of Multiple Gingival Recessions Using Acellular Dermal Matrix Allografts.. <i>International Journal of Periodontics &amp; Restorative Dentistry</i> . 2017/11//Nov/Dec2017. 37:842 | Level 1, Form<br>Title/abstract<br>screen |
| 3004 | <b>Jane Murray Cramm, Anna Petra Nieboer.</b> Validation of an instrument to assess the delivery of patient-centred care to people with intellectual disabilities as perceived by professionals.. <i>BMC Health Services Research</i> . 2017/07/11/. 17:1                                                                           | Level 1, Form<br>Title/abstract<br>screen |
| 3005 | <b>Megan Shen, Heidi Hamann, Anna Thomas, Jamie Ostroff, Megan Johnson Shen, Heidi A Hamann, Anna J Thomas, Jamie S Ostroff.</b> Association between patient-provider communication and lung cancer stigma.. <i>Supportive Care in Cancer</i> . 2016/05//. 24:2093                                                                  | Level 1, Form<br>Title/abstract<br>screen |
| 3010 | <b>McLean D. Pollock, Sherri L. Green.</b> Effects of a Rural Family Drug Treatment Court Collaborative on Child Welfare Outcomes: Comparison Using Propensity Score Analysis.. <i>Child Welfare</i> . 2015/05//. 94:139                                                                                                            | Level 1, Form<br>Title/abstract<br>screen |
| 3013 | <b>Brendan McCormack, Marit Borg, Shaun Cardiff, Jan Dewing, Gaby Jacobs, Angie Titchen, Famke van Lieshout, Valerie Wilson.</b> A Kaleidoscope of Hope: Exploring Experiences of Hope Among Service Users and Informal Carers in Health Care Contexts.. <i>Journal of Holistic Nursing</i> . 2017/09//. 35:247                     | Level 1, Form<br>Title/abstract<br>screen |
| 3016 | <b>Claire Fitzpatrick.</b> What do we know about girls in the care and criminal justice systems?. <i>Safer Communities</i> . 2017/07//. 16:134                                                                                                                                                                                      | Level 1, Form<br>Title/abstract<br>screen |
| 3017 | <b>Stefan G. Kertesz.</b> The Unexpected Urine Test: A Matter Far From Simple.. <i>Journal of Addiction Medicine</i> . 2017/11//Nov/Dec2017. 11:417                                                                                                                                                                                 | Level 1, Form<br>Title/abstract<br>screen |
| 3018 | <b>Laurie Abler, Kathleen J. Sikkema, Melissa H. Watt, Nathan B. Hansen, Patrick A. Wilson, Arlene Kochman.</b> Depression and HIV Serostatus Disclosure to Sexual Partners Among Newly HIV-Diagnosed Men Who Have Sex with Men.. <i>AIDS Patient Care &amp; STDs</i> . 2015/10//. 29:550                                           | Level 1, Form<br>Title/abstract<br>screen |
| 3021 | <b>John F. Kelly.</b> Tens of millions successfully in long-term recovery-let us find out how they did it.. <i>Addiction</i> . 2017/05//. 112:762                                                                                                                                                                                   | Level 1, Form<br>Title/abstract<br>screen |
| 3022 | <b>Kamilah Konrad.</b> Basics of Patient Navigation.. <i>Journal of Oncology Navigation &amp; Survivorship</i> . 2016/05//. 7:20                                                                                                                                                                                                    | Level 1, Form<br>Title/abstract<br>screen |
| 3023 | <b>Emma Wilkinson.</b> Promoting smoking cessation as an essential part of diabetes care.. <i>Practice Nursing</i> . 2015/01//. 26:36                                                                                                                                                                                               | Level 1, Form<br>Title/abstract<br>screen |
| 3025 | <b>Travis Hales, Nancy Kusmaul, Thomas Nochajski.</b> Exploring the Dimensionality of Trauma-Informed Care: Implications for Theory and Practice.. <i>Human Service Organizations: Management, Leadership &amp; Governance</i> . 2017/06//Jun-Aug2017. 41:317                                                                       | Level 1, Form<br>Title/abstract<br>screen |
| 3026 | <b>Patricia Leighton, LeAnn Perkins.</b> Long-term cancer survivorship nurse                                                                                                                                                                                                                                                        | Level 1, Form                             |



|      |                                                                                                                                                                                                                                                                                                                                                                   |                                     |
|------|-------------------------------------------------------------------------------------------------------------------------------------------------------------------------------------------------------------------------------------------------------------------------------------------------------------------------------------------------------------------|-------------------------------------|
|      | practitioner care model promotes patient quality of life.. <i>American Nurse Today</i> . 2015/06//. 10:37                                                                                                                                                                                                                                                         | Title/abstract screen               |
| 3028 | <b>Lori Ebert, Carol Malte, Kim Hamlett-Berry, Jean Beckham, Miles McFall, Andrew Saxon.</b> Use of a Learning Collaborative to Support Implementation of Integrated Care for Smoking Cessation for Veterans With Posttraumatic Stress Disorder.. <i>American Journal of Public Health</i> . 2014/10//. 104:1935                                                  | Level 1, Form Title/abstract screen |
| 3029 | <b>Michael T. McKay, James R. Andretta, Jon C. Cole.</b> How Individuals Feel About the Past, Present, and Future Bears Little Relation to Alcohol-Related Problems, Anxiety, and Depression: A Person-Centered Analysis in a University Sample.. <i>Substance Use &amp; Misuse</i> . 2017/05//. 52:734                                                           | Level 1, Form Title/abstract screen |
| 3030 | <b>David Otiashvili, Irma Kirtadze, Kevin E. O'Grady, William Zule, Evgeny Krupitsky, Wendee M. Wechsberg, Hendrée E. Jones.</b> Comprehensive women-centered treatment for substance use disorders in Georgia: current status and future directions.. <i>Journal of Substance Use</i> . 2015/10//. 20:367                                                        | Level 2, Form Full Text Screening   |
| 3031 | <b>Johanna Taylor, David Shiers.</b> Don't Just Screen -- Intervene: Protecting the cardiometabolic health of people with severe mental illness.. <i>Diabetes &amp; Primary Care</i> . 2017/09//. 19:217                                                                                                                                                          | Level 1, Form Title/abstract screen |
| 3034 | <b>Brandon Snead, Debra Pakstis, Breonna Evans, Rhonda Nelson.</b> The Use of Creative Writing Interventions in Substance Abuse Treatment.. <i>Therapeutic Recreation Journal</i> . 2015/03//. 49:179                                                                                                                                                             | Level 1, Form Title/abstract screen |
| 3039 | <b>Ranak B. Trivedi, Edward P. Post, Haili Sun, Andrew Pomerantz, Andrew J. Saxon, John D. Piette, Charles Maynard, Bruce Arnow, Idamay Curtis, Stephan D. Fihn, Karin Nelson.</b> Prevalence, Comorbidity, and Prognosis of Mental Health Among US Veterans.. <i>American Journal of Public Health</i> . 2015/12//. 105:2564                                     | Level 1, Form Title/abstract screen |
| 3042 | <b>Amy O'Donnell, Catherine Haighton, David Chappel, Colin Shevills, Eileen Kaner.</b> Impact of financial incentives on alcohol intervention delivery in primary care: a mixed-methods study.. <i>BMC Family Practice</i> . 2016/11/25/. 17:1                                                                                                                    | Level 1, Form Title/abstract screen |
| 3046 | <b>Phillip Coffin, Glenn-Milo Santos, Grant Colfax, Moupali Das, Tim Matheson, Erin DeMicco, James Dilley, Eric Vittinghoff, Jerris Raiford, Monique Carry, Jeffrey Herbst.</b> Adapted Personalized Cognitive Counseling for Episodic Substance-Using Men Who Have Sex with Men: A Randomized Controlled Trial.. <i>AIDS &amp; Behavior</i> . 2014/07//. 18:1390 | Level 1, Form Title/abstract screen |
| 3047 | <b>Charl Els.</b> Interrupting the disease of tobacco addiction.. <i>Canadian Journal of Dental Hygiene</i> . 2014/11//. 48:167                                                                                                                                                                                                                                   | Level 1, Form Title/abstract screen |
| 3049 | <b>Gary Enos.</b> Many buprenorphine prescribers falling well short of patient limits, study shows.. <i>Alcoholism &amp; Drug Abuse Weekly</i> . 2017/11/13/. 29:1                                                                                                                                                                                                | Level 1, Form Title/abstract screen |
| 3050 | <b>Taeho Greg Rhee, Roni L. Evans, Donna D. McAlpine, Pamela Jo Johnson.</b> Racial/Ethnic Differences in the Use of Complementary and Alternative Medicine in US Adults With Moderate Mental Distress.. <i>Journal of Primary Care &amp; Community Health</i> . 2017/04//. 8:43                                                                                  | Level 1, Form Title/abstract screen |
| 3051 | <b>Coral Sirdifield, Susan Chipchase, Sara Owen, Aloysius Siriwardena.</b> A Systematic Review and Meta-Synthesis of Patients' Experiences and Perceptions of Seeking and Using Benzodiazepines and Z-Drugs: Towards Safer Prescribing.. <i>Patient</i> . 2017/02//. 10:1                                                                                         | Level 1, Form Title/abstract screen |
| 3053 | <b>Anita Ho.</b> Reconciling Patient Safety and Epistemic Humility: An Ethical Use                                                                                                                                                                                                                                                                                | Level 1, Form                       |

|      |                                                                                                                                                                                                                                                                                          |                                     |
|------|------------------------------------------------------------------------------------------------------------------------------------------------------------------------------------------------------------------------------------------------------------------------------------------|-------------------------------------|
|      | of Opioid Treatment Plans.. <i>Hastings Center Report</i> . 2017/05//. 47:34                                                                                                                                                                                                             | Title/abstract screen               |
| 3056 | <b>Eva Biringer, Larry Davidson, Bengt Sundfør, Torleif Ruud, Marit Borg.</b> Service users' expectations of treatment and support at the Community Mental Health Centre in their recovery.. <i>Scandinavian Journal of Caring Sciences</i> . 2017/09//. 31:505                          | Level 1, Form Title/abstract screen |
| 3058 | <b>Juliana MacÃdo MagalhÃes, Claudete Ferreira de Souza Monteiro, Maria do Livramento Fortes Figueiredo.</b> The teenagers' idea about the prevention of crack.. <i>Revista de Pesquisa: Cuidado e Fundamental</i> . 2013/12/15/dez2013 special issue. 5:28                            | Level 1, Form Title/abstract screen |
| 3059 | <b>Patricia E. Fikar, Kent A. Edlund, Dave Newell.</b> Current preventative and health promotional care offered to patients by chiropractors in the United Kingdom: a survey.. <i>Chiropractic &amp; Manual Therapies</i> . 2015/03//. 23:1                                              | Level 1, Form Title/abstract screen |
| 3061 | <b>Brooke Faria da Cunha.</b> Ethics and Undertreatment of Pain in Patients with a History of Drug Abuse.. <i>Med-Surg Matters</i> . 2015/01//Jan/Feb2015. 24:4                                                                                                                          | Level 1, Form Title/abstract screen |
| 3063 | <b>Kristina B. Wolff, Christina Soncrant, Peter D. Mills, Robin R. Hemphill.</b> Flash Burns While on Home Oxygen Therapy: Tracking Trends and Identifying Areas for Improvement.. <i>American Journal of Medical Quality</i> . 2017/07//Jul/Aug2017. 32:445                             | Level 1, Form Title/abstract screen |
| 3066 | <b>Mary Perez, Kristen Yawea.</b> Recovery Practice Implementation on Adult/Geriatric Acute Psychiatric Units...APNA 31st Annual Conference, October 18-21, 2017, Phoenix, Arizona: Part I. <i>Journal of the American Psychiatric Nurses Association</i> . 2018/05//May/Jun2018. 24:280 | Level 1, Form Title/abstract screen |
| 3068 | <b>Nancy K. Young, Julie Collins.</b> Special Foreword: Substance Use and Child Welfare.. <i>Child Welfare</i> . 2015/07//. 94:11                                                                                                                                                        | Level 1, Form Title/abstract screen |
| 3070 | <b>Herbert Fillmore, C. Annette DuBard, Grant A. Ritter, Carlos T. Jackson.</b> Health Care Savings with the Patient-Centered Medical Home: Community Care of North Carolina's Experience.. <i>Population Health Management</i> . 2014/06//. 17:141                                      | Level 1, Form Title/abstract screen |
| 3072 | <b>Deborah W. Busch.</b> Clinical Management of the Breast-Feeding Mother-Infant Dyad in Recovery From Opioid Dependence.. <i>Journal of Addictions Nursing (Lippincott Williams &amp; Wilkins)</i> . 2016/04//Apr-Jun2016. 27:68                                                        | Level 1, Form Title/abstract screen |
| 3074 | <b>Jennifer Percival.</b> How nurses can help patients with heart conditions to stop smoking.. <i>Nurse Prescribing</i> . 2013/09//. 11:442                                                                                                                                              | Level 1, Form Title/abstract screen |
| 3076 | <b>Bob Price.</b> Discussing risk with patients.. <i>Nursing Standard</i> . 2017/04/12/. 31:53                                                                                                                                                                                           | Level 1, Form Title/abstract screen |
| 3077 | <b>Carol Strike, Tara Marie Watson.</b> Relationships between needle and syringe programs and police: An exploratory analysis of the potential role of in-service training.. <i>Drug &amp; Alcohol Dependence</i> . 2017/06//. 175:51                                                    | Level 1, Form Title/abstract screen |
| 3079 | <b>J. Bold.</b> Nutrition and integrative approaches to infertility: improving patient experience and outcomes.. <i>Journal of Pelvic, Obstetric &amp; Gynaecological Physiotherapy</i> . 2017///Spring2017. #volume#:28                                                                 | Level 1, Form Title/abstract screen |
| 3080 | <b>John Hansen.</b> Opiates for Chronic Pain.. <i>Pain Practice</i> . 2017/01//. 17:147                                                                                                                                                                                                  | Level 1, Form Title/abstract screen |

|      |                                                                                                                                                                                                                                                                                                                                                                                                                                                                            |                                           |
|------|----------------------------------------------------------------------------------------------------------------------------------------------------------------------------------------------------------------------------------------------------------------------------------------------------------------------------------------------------------------------------------------------------------------------------------------------------------------------------|-------------------------------------------|
| 3083 | <b>Álvaro Camacho, Patricia González, Sheila Castañeda, Alan Simmons, Christina Buelna, Hector Lemus, Gregory Talavera.</b> Improvement in Depressive Symptoms Among Hispanic/Latinos Receiving a Culturally Tailored IMPACT and Problem-Solving Intervention in a Community Health Center.. <i>Community Mental Health Journal</i> . 2015/05//. 51:385                                                                                                                    | Level 1, Form<br>Title/abstract<br>screen |
| 3085 | <b>Ethel Bastos da Silva, Stella Maris de Mello Padoin, Lucila Amaral Carneiro Vianna.</b> Violência contra a mulher: limites e potencialidades da prática assistencial.. <i>Acta Paulista de Enfermagem</i> . 2013/12//. 26:608                                                                                                                                                                                                                                           | Level 1, Form<br>Title/abstract<br>screen |
| 3086 | <b>Ethel Bastos da Silva, Stella Maris de Mello Padoin, Lucila Amaral Carneiro Vianna.</b> Violence against women: the limits and potentialities of care practice.. <i>Acta Paulista de Enfermagem</i> . 2013/12//. 26:608                                                                                                                                                                                                                                                 | Level 1, Form<br>Title/abstract<br>screen |
| 3087 | <b>Caroline Stephens, Nathan Sackett, Read Pierce, David Schopfer, Gabriela Schmajuk, Nicholas Moy, Melissa Bachhuber, Margaret I. Wallhagen, Sei J. Lee.</b> Transitional Care Challenges of Rehospitalized Veterans: Listening to Patients and Providers.. <i>Population Health Management</i> . 2013/10//. 16:326                                                                                                                                                       | Level 1, Form<br>Title/abstract<br>screen |
| 3088 | <b>Suzanne M. Peloquin, Carrie A. Ciro.</b> Population-Centered Life Skills Groups: Perceptions of Satisfaction and Engagement.. <i>American Journal of Occupational Therapy</i> . 2013/09//Sep/Oct2013. 67:594                                                                                                                                                                                                                                                            | Level 1, Form<br>Title/abstract<br>screen |
| 3090 | <b>Heather Howard.</b> Experiences of opioid-dependent women in their prenatal and postpartum care: Implications for social workers in health care.. <i>Social Work in Health Care</i> . 2016/01//. 55:61                                                                                                                                                                                                                                                                  | Level 1, Form<br>Title/abstract<br>screen |
| 3091 | <b>Rakesh K. Chadda, Biswadeep Chatterjee.</b> Need for psychosocial interventions: From resistance to therapeutic alliance.. <i>Indian Journal of Psychiatry</i> . 2018/02/04/2018 Supplement. 60:S440                                                                                                                                                                                                                                                                    | Level 1, Form<br>Title/abstract<br>screen |
| 3092 | <b>James Friction, Jeffrey Crandall.</b> Solving the Access to Care Problem for Patients with Orofacial Pain.. <i>Journal of Oral &amp; Facial Pain &amp; Headache</i> . 2018//Winter2018. 32:e5                                                                                                                                                                                                                                                                           | Level 1, Form<br>Title/abstract<br>screen |
| 3096 | <b>Jenny Edwins.</b> Supporting smoking cessation in pregnancy.. <i>British Journal of Midwifery</i> . 2013/03//. 21:174                                                                                                                                                                                                                                                                                                                                                   | Level 1, Form<br>Title/abstract<br>screen |
| 3098 | <b>Benjamin R. Nordstrom, Elizabeth C. Saunders, Bethany McLeman, Andrea Meier, Haiyi Xie, Chantal Lambert-Harris, Beth Tanzman, John Brooklyn, Gregory King, Nels Kloster, Clifton Frederick Lord, William Roberts, Mark P. McGovern.</b> Using a Learning Collaborative Strategy With Office-based Practices to Increase Access and Improve Quality of Care for Patients With Opioid Use Disorders.. <i>Journal of Addiction Medicine</i> . 2016/03//Mar/Apr2016. 10:117 | Level 1, Form<br>Title/abstract<br>screen |
| 3100 | <b>Courtney S. Davis, Leigh Ann R. Ross, Lauren S. Bloodworth.</b> The Impact of Clinical Pharmacist Integration on a Collaborative Interdisciplinary Diabetes Management Team.. <i>Journal of Pharmacy Practice</i> . 2017/06//. 30:286                                                                                                                                                                                                                                   | Level 1, Form<br>Title/abstract<br>screen |
| 3101 | <b>Melanie D. Parks.</b> Barriers to Clinical Practice.. <i>Journal of Doctoral Nursing Practice</i> . 2017/03//. 10:135                                                                                                                                                                                                                                                                                                                                                   | Level 1, Form<br>Title/abstract<br>screen |
| 3103 | <b>Kathryn A. Becker-Blease.</b> As the world becomes trauma-informed, work to do.. <i>Journal of Trauma &amp; Dissociation</i> . 2017/03//Mar/Apr2017. 18:131                                                                                                                                                                                                                                                                                                             | Level 1, Form<br>Title/abstract<br>screen |
| 3104 | <b>Lisa Carter-Harris, Susan Brandzel, Karen J. Wernli, Joshua A. Roth, Diana S. M. Buist.</b> A qualitative study exploring why individuals opt out of lung cancer screening.. <i>Family Practice</i> . 2017/04//4/1/2017. 34:238                                                                                                                                                                                                                                         | Level 1, Form<br>Title/abstract<br>screen |

|      |                                                                                                                                                                                                                                                                                                                                                                       |                                           |
|------|-----------------------------------------------------------------------------------------------------------------------------------------------------------------------------------------------------------------------------------------------------------------------------------------------------------------------------------------------------------------------|-------------------------------------------|
| 3105 | <b>Stephen J. Bartels, Renee Pepin, Lydia E. Gill.</b> The Paradox of Scarcity in a Land of Plenty: Meeting the Needs of Older Adults with Mental Health and Substance Use Disorders.. <i>Generations</i> . 2014//Fall2014. 38:6                                                                                                                                      | Level 1, Form<br>Title/abstract<br>screen |
| 3107 | <b>Ottar Ness, Marit Borg, Randi Semb, Alain Topor.</b> “Negotiating partnerships:” parents’ experiences of collaboration in community mental health and substance use services.. <i>Advances in Dual Diagnosis</i> . 2016/12//. 9:130                                                                                                                                | Level 1, Form<br>Title/abstract<br>screen |
| 3108 | <b>Richard Zheng, Maria Altieri, Jie Yang, Hao Chen, Aurora Pryor, Andrew Bates, Mark Talamini, Dana Telem, Maria S Altieri, Aurora D Pryor, Mark A Talamini, Dana A Telem.</b> Long-term incidence of contralateral primary hernia repair following unilateral inguinal hernia repair in a cohort of 32,834 patients.. <i>Surgical Endoscopy</i> . 2017/02//. 31:817 | Level 1, Form<br>Title/abstract<br>screen |
| 3109 | <b>Lisa Carter-Harris, James E. Slaven, Patrick Monohan, Susan M. Rawl.</b> Development and Psychometric Evaluation of the Lung Cancer Screening Health Belief Scales.. <i>Cancer Nursing</i> . 2017/05//May/Jun2017. 40:237                                                                                                                                          | Level 1, Form<br>Title/abstract<br>screen |
| 3111 | <b>Virgil Dickson.</b> Hospitals turn to collaborative agreements to battle addiction crisis.. <i>Modern Healthcare</i> . 2018/01/15/. 48:0006                                                                                                                                                                                                                        | Level 1, Form<br>Title/abstract<br>screen |
| 3115 | <b>Rosalind Abdool, Michael Szego, Daniel Buchman, Leah Justason, Sally Bean, Ann Heesters, Hannah Kaufman, Bob Parke, Frank Wagner, Jennifer Gibson.</b> Difficult healthcare transitions.. <i>Nursing Ethics</i> . 2016/11//. 23:770                                                                                                                                | Level 1, Form<br>Title/abstract<br>screen |
| 3119 | <b>Jeffrey Abracen, Jan Looman, Meaghan Ferguson.</b> Substance abuse among sexual offenders: review of research and clinical implications.. <i>Journal of Sexual Aggression</i> . 2017/11//. 23:235                                                                                                                                                                  | Level 1, Form<br>Title/abstract<br>screen |
| 3121 | <b>Stephen F. Butler, Kevin L. Zacharoff, Sadaf Charity, Ryan A. Black, Emma Chung, Antje Barreveld, Molly S. Clark, Robert N. Jamison.</b> Impact of an Electronic Pain and Opioid Risk Assessment Program: Are There Improvements in Patient Encounters and Clinic Notes?. <i>Pain Medicine</i> . 2016/11//. 17:2047                                                | Level 1, Form<br>Title/abstract<br>screen |
| 3122 | <b>Marc Pimslser.</b> The cunning, powerful addiction that is VALIDATION.. <i>Addiction Professional</i> . 2015//Spring2015. 13:22                                                                                                                                                                                                                                    | Level 1, Form<br>Title/abstract<br>screen |
| 3123 | <b>Jim McCambridge, Stephen Rollnick.</b> Big issues.. <i>Addiction</i> . 2014/07//. 109:1063                                                                                                                                                                                                                                                                         | Level 1, Form<br>Title/abstract<br>screen |
| 3124 | <b>Evalina van Wijk, Annalene Traut, Hester Julie.</b> Environmental and nursing-staff factors contributing to aggressive and violent behaviour of patients in mental health facilities.. <i>Curationis</i> . 2014/09//. 37:1                                                                                                                                         | Level 1, Form<br>Title/abstract<br>screen |
| 3125 | <b>Rachel A. Sebastian, Mary M. Ramos.</b> 265 - Adolescent Substance Use and Quality of Care: Self-Reported Substance Use, Receipt of Anticipatory Guidance, and Patient-Centered Care among School-Based Health Center Users in New Mexico.. <i>Journal of Adolescent Health</i> . 2018/02/02/2018 Supplement. 62:S134                                              | Level 1, Form<br>Title/abstract<br>screen |
| 3126 | <b>Sala Horowitz.</b> Treating Veterans' Chronic Pain and Mental Health Disorders: An Integrative, Patient-Centered Approach.. <i>Alternative &amp; Complementary Therapies</i> . 2013/06//. 19:133                                                                                                                                                                   | Level 1, Form<br>Title/abstract<br>screen |
| 3127 | <b>Victoria Adewale, Dianne Ritchie, Sarah Everhart Skeels.</b> African-American and African perspectives on mental health: A pilot study of the pre and post colonial and slavery influences and their implications on mental health.. <i>Journal</i>                                                                                                                | Level 1, Form<br>Title/abstract<br>screen |

|      |                                                                                                                                                                                                                                                                                                                                                                                                                                                                                                                                                                                                                                                                                            |                                     |
|------|--------------------------------------------------------------------------------------------------------------------------------------------------------------------------------------------------------------------------------------------------------------------------------------------------------------------------------------------------------------------------------------------------------------------------------------------------------------------------------------------------------------------------------------------------------------------------------------------------------------------------------------------------------------------------------------------|-------------------------------------|
|      | <i>of Communication in Healthcare</i> . 2016/07//. 9:78                                                                                                                                                                                                                                                                                                                                                                                                                                                                                                                                                                                                                                    |                                     |
| 3131 | . In Case You Haven't Heard.. <i>Alcoholism &amp; Drug Abuse Weekly</i> . 2018/04/30/. 30:8                                                                                                                                                                                                                                                                                                                                                                                                                                                                                                                                                                                                | Level 1, Form Title/abstract screen |
| 3132 | <b>Mahesh Jayaram, Malcolm Hopwood, Christos Pantelis</b> . Can we raise the standard of care in treating schizophrenia: A cautionary note!. <i>Australian &amp; New Zealand Journal of Psychiatry</i> . 2017/06//. 51:557                                                                                                                                                                                                                                                                                                                                                                                                                                                                 | Level 1, Form Title/abstract screen |
| 3133 | <b>Ahmed Rashid</b> . Yonder: Chronic pain, asthma, obstructive sleep apnoea, and methadone prescribing.. <i>British Journal of General Practice</i> . 2018/05//. 68:237                                                                                                                                                                                                                                                                                                                                                                                                                                                                                                                   | Level 1, Form Title/abstract screen |
| 3136 | <b>John Epling</b> . THE "OTHER" PREVENTIVE SERVICES: Behavioral Risk Factor Counseling and Chemoprophylaxis Recommendations from the US Preventive Services Task Force.. <i>Family Doctor: A Journal of the New York State Academy of Family Physicians</i> . 2014//Spring2014. #volume#:17                                                                                                                                                                                                                                                                                                                                                                                               | Level 1, Form Title/abstract screen |
| 3143 | <b>Freyr Sigmundsson, Bo Jönsson, Björn Strömqvist, Freyr Gauti Sigmundsson</b> . Determinants of patient satisfaction after surgery for central spinal stenosis without concomitant spondylolisthesis: a register study of 5100 patients.. <i>European Spine Journal</i> . 2017/02//. 26:473                                                                                                                                                                                                                                                                                                                                                                                              | Level 1, Form Title/abstract screen |
| 3145 | <b>W. Richard Cowling</b> . Where Is Holistic Nursing?. <i>Journal of Holistic Nursing</i> . 2018/03//. 36:4                                                                                                                                                                                                                                                                                                                                                                                                                                                                                                                                                                               | Level 1, Form Title/abstract screen |
| 3146 | <b>Shane A. Phillips, Sharon Martino, Ross Arena</b> . Research Opportunities and Challenges in the Era of Healthy Living Medicine: Unlocking the Potential.. <i>Progress in Cardiovascular Diseases</i> . 2017/03//. 59:498                                                                                                                                                                                                                                                                                                                                                                                                                                                               | Level 1, Form Title/abstract screen |
| 3147 | <b>Maria Asunción González Mestre, Paloma Amil Bujan, Esther Gil Sanchez, Eva Maria Rodriguez Pérez, Juan Antonio Camus Heras, Carme Boix De la Casa, Waleska Badia Rafecas, Edith Garcia Solanes, Marta Palou Aligue, M. Carmen de Amo Castillo, Montserrat Agramunt Perello, Meritxell Feixes Betriu, Margarita Jorda Recort, Maria Rosa Garcia Cerdan, Cristina Sanz Espuny, M. Ángeles Hierro Lapeyre, Julia Mena Sánchez, Maria del Carmen Rodriguez Pérez, Laura Muñoz Alfonso, Violeta Pérez Cáceres</b> . 10-year experience of expert patient programme Catalonia. Impact and results.. <i>International Journal of Integrated Care (IJIC)</i> . 2016/12/02/2016 Supplement. 16:1 | Level 1, Form Title/abstract screen |
| 3148 | <b>Mark D. Litt, Ronald M. Kadden, Howard Tennen, Elise Kabelá-Cormier</b> . Network Support II: Randomized controlled trial of Network Support treatment and cognitive behavioral therapy for alcohol use disorder.. <i>Drug &amp; Alcohol Dependence</i> . 2016/08//. 165:203                                                                                                                                                                                                                                                                                                                                                                                                            | Level 1, Form Title/abstract screen |
| 3149 | <b>Lee L. Prina</b> . Primary Care: Foundations Aim To Improve Access And Quality.. <i>Health Affairs</i> . 2017/10//. 36:1852                                                                                                                                                                                                                                                                                                                                                                                                                                                                                                                                                             | Level 1, Form Title/abstract screen |
| 3152 | <b>Amy W. Baughman, Phyllis Brawarsky, Tracy Onega, Tor D. Tosteson, Qianfei Wang, Anna N. A. Tosteson, Jennifer S. Haas</b> . Medical Home Transformation and Breast Cancer Screening.. <i>American Journal of Managed Care</i> . 2016/11//. 22:e382                                                                                                                                                                                                                                                                                                                                                                                                                                      | Level 1, Form Title/abstract screen |
| 3155 | <b>Laverne H. Stevens</b> . RELATING CLINICAL ASSESSMENT CONSIDERATIONS TO EHR MEANINGFUL USE PART II...Electronic Health Record. <i>Counselor: The Magazine for Addiction Professionals</i> . 2014/06//. 15:70                                                                                                                                                                                                                                                                                                                                                                                                                                                                            | Level 1, Form Title/abstract screen |

|      |                                                                                                                                                                                                                                                                                                                                                               |                                           |
|------|---------------------------------------------------------------------------------------------------------------------------------------------------------------------------------------------------------------------------------------------------------------------------------------------------------------------------------------------------------------|-------------------------------------------|
| 3158 | <b>Rhea E. Powell, Amanda Doty, Robin J. Casten, Barry W. Rovner, Kristin L. Rising.</b> A qualitative analysis of interprofessional healthcare team members' perceptions of patient barriers to healthcare engagement.. <i>BMC Health Services Research</i> . 2016/09/20/. 16:1                                                                              | Level 1, Form<br>Title/abstract<br>screen |
| 3159 | <b>Deborah Duncan.</b> Quit smoking support.. <i>Independent Nurse</i> . 2012/12/03/. #volume#:30                                                                                                                                                                                                                                                             | Level 1, Form<br>Title/abstract<br>screen |
| 3162 | <b>Sara Bitting, Angela Nash, Ashley Ochoa.</b> Houston Recovery Initiative.. <i>Journal of Addictions Nursing (Lippincott Williams &amp; Wilkins)</i> . 2016/04//Apr-Jun2016. 27:120                                                                                                                                                                         | Level 2, Form<br>Full Text<br>Screening   |
| 3164 | <b>Martin Härter, Anna-Lena Bartsch, Nina Egger, Hans-Helmut König, Levente Kriston, Holger Schulz, Michael Tiemann, Anna Levke Brütt, Angela Buchholz, Anna Levke Brütt.</b> Evaluating a collaborative smoking cessation intervention in primary care (ENTER): study protocol for a cluster-randomized controlled trial.. <i>Trials</i> . 2015/10/10/. 16:1 | Level 1, Form<br>Title/abstract<br>screen |
| 3165 | <b>Nancy M. Lucero, Marian Bussey.</b> A Collaborative and Trauma-Informed Practice Model for Urban Indian Child Welfare.. <i>Child Welfare</i> . 2012/05//May/Jun2012. 91:89                                                                                                                                                                                 | Level 1, Form<br>Title/abstract<br>screen |
| 3166 | <b>Lisa Carter-Harris, Andy S.L. Tan, Ramzi G. Salloum, Kelly C. Young-Wolff.</b> Patient-provider discussions about lung cancer screening pre- and post-guidelines: Health Information National Trends Survey (HINTS).. <i>Patient Education &amp; Counseling</i> . 2016/11//. 99:1772                                                                       | Level 1, Form<br>Title/abstract<br>screen |
| 3171 | <b>Laura Markwick.</b> Male, Female, Other: Transgender and the Impact in Primary Care.. <i>Journal for Nurse Practitioners</i> . 2016/05//. 12:330                                                                                                                                                                                                           | Level 1, Form<br>Title/abstract<br>screen |
| 3172 | <b>Anne Krueger.</b> Secrets YOUR DOCTOR WON'T TELL YOU.. <i>Arthritis Today</i> . 2013/09//Sep/Oct2013. 27:62                                                                                                                                                                                                                                                | Level 1, Form<br>Title/abstract<br>screen |
| 3176 | <b>Hashem S. Abu Tariah, Razan T. Hamed, Hassan D. Al-Omari.</b> Jordanian client perspectives of substance abuse: Implications for occupational therapists.. <i>International Journal of Therapy &amp; Rehabilitation</i> . 2015/12//. 22:566                                                                                                                | Level 1, Form<br>Title/abstract<br>screen |
| 3178 | <b>Harriet Burgess, Joanne Marie Ford, Sarah Kendal.</b> Are mental health nurses natural smoking cessation practitioners?. <i>Mental Health Practice</i> . 2015/11//. 19:34                                                                                                                                                                                  | Level 1, Form<br>Title/abstract<br>screen |
| 3180 | <b>Rolf Gjestad, Johan Franck, Staffan Lindberg, Brit Haver.</b> Early Treatment for Women with Alcohol Addiction (EWA) Reduces Mortality: A Randomized Controlled Trial with Long-Term Register Follow-up.. <i>Alcohol &amp; Alcoholism</i> . 2011/03//Mar/Apr2011. 46:170                                                                                   | Level 1, Form<br>Title/abstract<br>screen |
| 3182 | <b>Alison Knopf.</b> Congressional investigation into Alkermes opens.. <i>Alcoholism &amp; Drug Abuse Weekly</i> . 2017/11/13/. 29:5                                                                                                                                                                                                                          | Level 1, Form<br>Title/abstract<br>screen |
| 3183 | <b>Doran D, Paterson J, Clark C, Srivastava R, Goering PN, Kushniruk AW, Bajnok I, Nagle L, Almost J, Carryer J.</b> A pilot study of an electronic interprofessional evidence-based care planning tool for clients with mental health problems and addictions.. <i>Worldviews on Evidence-Based Nursing</i> . 2010//2010 3rd Quarter. 7:174                  | Level 1, Form<br>Title/abstract<br>screen |
| 3184 | <b>Nichole M. Scaglione, Kimberly A. Mallett, Rob Turrisi, Racheal Reavy, Michael J. Cleveland, Sarah Ackerman.</b> Who Will Experience the Most Alcohol Problems in College? The Roles of Middle and High School Drinking                                                                                                                                    | Level 1, Form<br>Title/abstract<br>screen |

|      |                                                                                                                                                                                                                                                                                                                                                                                                                                                        |                                           |
|------|--------------------------------------------------------------------------------------------------------------------------------------------------------------------------------------------------------------------------------------------------------------------------------------------------------------------------------------------------------------------------------------------------------------------------------------------------------|-------------------------------------------|
|      | Tendencies.. <i>Alcoholism: Clinical &amp; Experimental Research</i> . 2015/10//. 39:2039                                                                                                                                                                                                                                                                                                                                                              |                                           |
| 3186 | <b>Paul E. Terry, Erin LD Seaverson, Michael J. Stauffer, Akiko Tanaka.</b> The Effectiveness of a Telephone-Based Tobacco Cessation Program Offered as Part of a Worksite Health Promotion Program.. <i>Population Health Management</i> . 2011/06//. 14:117                                                                                                                                                                                          | Level 1, Form<br>Title/abstract<br>screen |
| 3189 | <b>Rebecca Bosworth.</b> STUDENT KNOWLEDGE OF PROVIDING CARE FOR WOMEN WHO EXPERIENCE ALCOHOL-USE DISORDERS.. <i>Australian Nursing &amp; Midwifery Journal</i> . 2016/12//Dec2016/Jan2017. 24:37                                                                                                                                                                                                                                                      | Level 1, Form<br>Title/abstract<br>screen |
| 3190 | <b>Peter Cremer-Schaeffer, K. Broich.</b> Betäubungsmittelrecht und Palliativversorgung.. <i>Gesundheitsökonomie &amp; Qualitätsmanagement</i> . 2015/10//. 20:216                                                                                                                                                                                                                                                                                     | Level 1, Form<br>Title/abstract<br>screen |
| 3191 | <b>Rickard Elmore.</b> An interventionist's VIEW of treatment centers.. <i>Addiction Professional</i> . 2015//Spring2015. 13:19                                                                                                                                                                                                                                                                                                                        | Level 1, Form<br>Title/abstract<br>screen |
| 3196 | <b>Jennifer Steel, David A Geller, Allan Tsung, J Wallis Marsh, Mary Amanda Dew, Michael Spring, Jonathan Grady, Sonja Likumahuwa, Andrea Dunlavy, Michael Youssef, Michael Antoni, Lisa H Butterfield, Richard Schulz, Richard Day, Vicki Helgeson, Kevin H Kim, T Clark Gamblin.</b> Randomized controlled trial of a collaborative care intervention to manage cancer-related symptoms: lessons learned.. <i>Clinical Trials</i> . 2011/06//. 8:298 | Level 1, Form<br>Title/abstract<br>screen |
| 3199 | <b>DANIEL B. CARR.</b> PRESIDENT'S MESSAGE. Patients with Pain Need Less Stigma, Not More.. <i>Pain Medicine</i> . 2016/08//. 17:1391                                                                                                                                                                                                                                                                                                                  | Level 1, Form<br>Title/abstract<br>screen |
| 3202 | <b>Deborah Antai-Otong, Kristine Theis, Dee Dee Patrick.</b> Dual Diagnosis.. <i>Nursing Clinics of North America</i> . 2016/06//. 51:237                                                                                                                                                                                                                                                                                                              | Level 1, Form<br>Title/abstract<br>screen |
| 3205 | <b>Resa M. Jones, Kara P. Wiseman, Marina Kharitonova.</b> Association between high school students' cigarette smoking, asthma and related beliefs: a population-based study.. <i>BMC Public Health</i> . 2016/09//9/1/2016. 16:1                                                                                                                                                                                                                      | Level 1, Form<br>Title/abstract<br>screen |
| 3209 | <b>Quanbeck AR, Madden L, Edmundson E, Ford JH 2nd, McConnell KJ, McCarty D, Gustafson DH, Andrew R Quanbeck, Lynn Madden, Eldon Edmundson, James H 2nd Ford, K John McConnell, Dennis McCarty, David H Gustafson.</b> A business case for quality improvement in addiction treatment: evidence from the NIATx collaborative.. <i>Journal of Behavioral Health Services &amp; Research</i> . 2012/01//. 39:91                                          | Level 2, Form<br>Full Text<br>Screening   |
| 3212 | <b>Strike C, Rufo C.</b> Embarrassing, degrading, or beneficial: patient and staff perspectives on urine drug testing in methadone maintenance treatment.. <i>Journal of Substance Use</i> . 2010/10//. 15:303                                                                                                                                                                                                                                         | Level 2, Form<br>Full Text<br>Screening   |
| 3213 | <b>Jolynne 'Jo' Carter, Sandra Zawalski, Patrice V. Sminkey, Bruce Christopherson.</b> Assessing the Whole Person: Case Managers Take a Holistic Approach to Physical and Mental Health.. <i>Professional Case Management</i> . 2015/05//May/Jun2015. 20:140                                                                                                                                                                                           | Level 1, Form<br>Title/abstract<br>screen |
| 3215 | <b>Arnetz JE, Winblad U, Höglund AT, Lindahl B, Spångberg K, Wallentin L, Wang Y, Ager J, Arnetz BB.</b> Is patient involvement during hospitalization for acute myocardial infarction associated with post-discharge treatment outcome? An exploratory study.. <i>Health Expectations</i> . 2010/09//. 13:298                                                                                                                                         | Level 1, Form<br>Title/abstract<br>screen |
| 3218 | <b>Pevzner ES, Robison S, Donovan J, Allis D, Spitters C, Friedman R, Ijaz</b>                                                                                                                                                                                                                                                                                                                                                                         | Level 1, Form                             |

|      |                                                                                                                                                                                                                                                                                                                                                           |                                     |
|------|-----------------------------------------------------------------------------------------------------------------------------------------------------------------------------------------------------------------------------------------------------------------------------------------------------------------------------------------------------------|-------------------------------------|
|      | <b>K,Oeltmann JE.</b> Tuberculosis transmission and use of methamphetamines in Snohomish County, WA, 1991-2006.. <i>American Journal of Public Health.</i> 2010/12//. 100:2481                                                                                                                                                                            | Title/abstract screen               |
| 3220 | <b>Tina M. Trudel, Marcia J. Scherer, Eileen Elias.</b> Understanding Traumatic Brain Injury: An Introduction.. <i>Exceptional Parent.</i> 2011/07//. 41:33                                                                                                                                                                                               | Level 1, Form Title/abstract screen |
| 3221 | <b>Andreas Heinz, Tomislav Majić.</b> Effective and Neurobiologically Sound.. <i>Deutsches Aerzteblatt International.</i> 2015/10/09/. 112:681                                                                                                                                                                                                            | Level 2, Form Full Text Screening   |
| 3222 | <b>Gary Enos.</b> Study suggests viable alternative to mandate-driven OTP approaches.. <i>Alcoholism &amp; Drug Abuse Weekly.</i> 2017/03/27/. 29:1                                                                                                                                                                                                       | Level 2, Form Full Text Screening   |
| 3223 | <b>Yong Liu, Janet B. Croft, Anne G. Wheaton, Dafna Kanny, Timothy J. Cunningham, Hua Lu, Stephen Onufrak, Ann M. Malarcher, Kurt J. Greenlund, Wayne H. Giles, Yong Liu, Hua Lu.</b> Clustering of Five Health-Related Behaviors for Chronic Disease Prevention Among Adults, United States, 2013.. <i>Preventing Chronic Disease.</i> 2016/05/26/. 13:1 | Level 1, Form Title/abstract screen |
| 3224 | <b>Stephen W. Patrick, Robert E. Schumacher, Jeffrey D. Horbar, Madge E. Buus-Frank.</b> Improving Care for Neonatal Abstinence Syndrome.. <i>Pediatrics.</i> 2016/05//. 137:1                                                                                                                                                                            | Level 1, Form Title/abstract screen |
| 3225 | <b>Andrea H. Kline-Simon, Constance Weisner, Stacy Sterling.</b> Point Prevalence of Co-Occurring Behavioral Health Conditions and Associated Chronic Disease Burden Among Adolescents.. <i>Journal of the American Academy of Child &amp; Adolescent Psychiatry.</i> 2016/05//. 55:408                                                                   | Level 1, Form Title/abstract screen |
| 3226 | <b>Kim Manley, Val Hills, Sheila Marriot.</b> Person-centred care: principle of nursing practice D.. <i>Nursing Standard.</i> 2011/04/06/. 25:35                                                                                                                                                                                                          | Level 1, Form Title/abstract screen |
| 3227 | <b>Bryant-Jefferies R.</b> Alcohol misuse: a very human tragedy.. <i>Healthcare Counselling &amp; Psychotherapy Journal.</i> 2010/10//. 10:22                                                                                                                                                                                                             | Level 1, Form Title/abstract screen |
| 3228 | <b>Jeremy Ader, Christopher J. Stille, David Keller, Benjamin F. Miller, Michael S. Barr, James M. Perrin.</b> The Medical Home and Integrated Behavioral Health: Advancing the Policy Agenda.. <i>Pediatrics.</i> 2015/05//. 135:909                                                                                                                     | Level 1, Form Title/abstract screen |
| 3229 | <b>Jason D. Woollard, James E. Bost, Sara R. Piva, G. Kelley Fitzgerald, Mark W. Rodosky, James J. Irrgang.</b> The relationship of preoperative factors to patient-reported outcome in rotator cuff repair: a systematic review.. <i>Physical Therapy Reviews.</i> 2016/06//Jun-Dec2016. 21:138                                                          | Level 1, Form Title/abstract screen |
| 3230 | <b>Jane Carole Warner.</b> Behaviour change strategies for novice practice nurses.. <i>Primary Health Care.</i> 2010/11//. 20:25                                                                                                                                                                                                                          | Level 1, Form Title/abstract screen |
| 3233 | <b>LISA HAUK.</b> Management of Chronic Pain and Opioid Misuse: A Position Paper from the AAFP.. <i>American Family Physician.</i> 2017/04//4/1/2017. 95:458                                                                                                                                                                                              | Level 2, Form Full Text Screening   |
| 3237 | <b>Fred J. Dyer.</b> Therapeutic Alliance: The Glue That Makes Therapy Work.. <i>Counselor: The Magazine for Addiction Professionals.</i> 2015/06//. 16:35                                                                                                                                                                                                | Level 1, Form Title/abstract screen |
| 3241 | <b>Stephanie V. Phan.</b> Medication adherence in patients with schizophrenia.. <i>International Journal of Psychiatry in Medicine.</i> 2016/02//. 51:211                                                                                                                                                                                                 | Level 1, Form Title/abstract        |



|      |                                                                                                                                                                                                                                                                                                                                |                                           |
|------|--------------------------------------------------------------------------------------------------------------------------------------------------------------------------------------------------------------------------------------------------------------------------------------------------------------------------------|-------------------------------------------|
|      |                                                                                                                                                                                                                                                                                                                                | screen                                    |
| 3243 | <b>Roman Shrestha, Tania B. Huedo-Medina, Michael M. Copenhaver.</b> Sex-Related Differences in Self-Reported Neurocognitive Impairment among High-Risk Cocaine Users in Methadone Maintenance Treatment Program.. <i>Substance Abuse: Research &amp; Treatment</i> . 2015/01//. #volume#:17                                   | Level 1, Form<br>Title/abstract<br>screen |
| 3245 | <b>Joanna L. Hart, Emily Pflug, Vanessa Madden, Scott D. Halpern.</b> Thinking Forward: Future-oriented Thinking among Patients with Tobacco-associated Thoracic Diseases and Their Surrogates.. <i>American Journal of Respiratory &amp; Critical Care Medicine</i> . 2016/02//2/1/2016. 193:321                              | Level 1, Form<br>Title/abstract<br>screen |
| 3249 | <b>Handa K,Grace J,Trigoboff E,Olympia JL,Annalett D,Watson T,Poulose MC,Muzaffar T,Noyes FL,Kabatt A,Cushman S,Antonelli M,Baxter-Banks G,Newcomer D.</b> Continuing day treatment programs promote recovery in schizophrenia: a case-based study.. <i>Psychiatry (1550-5952)</i> . 2009/04//. 6:32                           | Level 1, Form<br>Title/abstract<br>screen |
| 3250 | <b>Madson M,Schumacher J,Bonnell M.</b> Motivational interviewing and alcohol.. <i>Healthcare Counselling &amp; Psychotherapy Journal</i> . 2010/10//. 10:13                                                                                                                                                                   | Level 1, Form<br>Title/abstract<br>screen |
| 3252 | <b>Mark Holmes, Hugo Jones.</b> Using online tools to treat alcohol misuse.. <i>Nursing Times</i> . 2016/04/27//. 112:12                                                                                                                                                                                                       | Level 1, Form<br>Title/abstract<br>screen |
| 3254 | <b>Anita Slomski.</b> Primary Care Treatment of Substance Use Disorder Reaches More Patients.. <i>JAMA: Journal of the American Medical Association</i> . 2017/11/28//. 318:1968                                                                                                                                               | Level 1, Form<br>Title/abstract<br>screen |
| 3255 | <b>Karen Jordan.</b> Integrating wellbeing services in healthcare pathways.. <i>Primary Health Care</i> . 2015/02//. 25:30                                                                                                                                                                                                     | Level 1, Form<br>Title/abstract<br>screen |
| 3258 | <b>Gilbert DJ,Harvey AR,Belgrave FZ.</b> Advancing the Africentric paradigm shift discourse: building toward evidence-based Africentric interventions in social work practice with African Americans.. <i>Social Work</i> . 2009/07//. 54:243                                                                                  | Level 1, Form<br>Title/abstract<br>screen |
| 3267 | <b>Deirdre Marshall.</b> Twenty-four-hour sexual assault care -- incorporating courtesy, dignity, privacy and respect.. <i>Healthcare Counselling &amp; Psychotherapy Journal</i> . 2012/01//. 12:26                                                                                                                           | Level 1, Form<br>Title/abstract<br>screen |
| 3268 | <b>Alyssa L. Rodgers.</b> Hope for Families Struggling with Adolescents and Addiction.. <i>PARADIGM (Targeted Publications Group, Inc)</i> . 2017/10//. 21:2                                                                                                                                                                   | Level 1, Form<br>Title/abstract<br>screen |
| 3270 | <b>Amanda H. Teague, Amy J. Jnah, Desi Newberry.</b> Intraprofessional Excellence in Nursing: Collaborative Strategies for Neonatal Abstinence Syndrome.. <i>Neonatal Network</i> . 2015/11//Nov/Dec2015. 34:320                                                                                                               | Level 1, Form<br>Title/abstract<br>screen |
| 3275 | <b>Esta Sužić, Ema Ničea Gruber, Blaženka Guberina Korotaj.</b> Bio-psychosocial model of treatment and rehabilitation of addicts during the conduction of safety measure of obligatory psychiatric treatment in prison hospital Zagreb.. <i>Alcoholism: Journal on Alcoholism &amp; Related Addictions</i> . 2014/09//. 50:93 | Level 1, Form<br>Title/abstract<br>screen |
| 3278 | <b>Ling S.</b> Nurse practitioners in drug and alcohol: where are they?. <i>Australian Journal of Advanced Nursing</i> . 2009/06//Jun-Aug2009. 26:64                                                                                                                                                                           | Level 1, Form<br>Title/abstract<br>screen |
| 3279 | . UK Alcohol Treatment Trial: client-treatment matching effects.. <i>Addiction</i> . 2008/02//. 103:228                                                                                                                                                                                                                        | Level 2, Form<br>Full Text<br>Screening   |
| 3281 | <b>Wu C,Lin C.</b> The application of motivational interviewing in nursing practice..                                                                                                                                                                                                                                          | Level 1, Form<br>Title/abstract           |

|      |                                                                                                                                                                                                                                                                                                                                                                                                                                                          |                                     |
|------|----------------------------------------------------------------------------------------------------------------------------------------------------------------------------------------------------------------------------------------------------------------------------------------------------------------------------------------------------------------------------------------------------------------------------------------------------------|-------------------------------------|
|      | <i>Journal of Nursing</i> . 2009/04//. 56:89                                                                                                                                                                                                                                                                                                                                                                                                             | screen                              |
| 3282 | <b>Betty J. Braxter, Kathy Puskar, Ann M. Mitchell, Holly Hagle, Heather Gotham, Martha Ann Terry.</b> Nursing Students' Experiences With Screening, Brief Intervention, and Referral to Treatment for Substance Use in the Clinical/Hospital Setting.. <i>Journal of Addictions Nursing (Lippincott Williams &amp; Wilkins)</i> . 2014/07//Jul-Sep2014. 25:122                                                                                          | Level 1, Form Title/abstract screen |
| 3283 | <b>Mariana Chilton, Molly Knowles, Jenny Rabinowich, Kimberly T Arnold.</b> The relationship between childhood adversity and food insecurity: 'It's like a bird nesting in your head'.. <i>Public Health Nutrition</i> . 2015/10//. 18:2643                                                                                                                                                                                                              | Level 1, Form Title/abstract screen |
| 3286 | <b>Furlong M, Leddy J, Ferguson J, Heart K.</b> Assertive community treatment and recovery at Thresholds.. <i>American Journal of Psychiatric Rehabilitation</i> . 2009/04//Apr-Jun2009. 12:108                                                                                                                                                                                                                                                          | Level 1, Form Title/abstract screen |
| 3287 | <b>Thomas JR, Fraser VV.</b> Implementing evidence-based supported employment in a recovery-oriented mental health agency.. <i>American Journal of Psychiatric Rehabilitation</i> . 2009/04//Apr-Jun2009. 12:143                                                                                                                                                                                                                                         | Level 1, Form Title/abstract screen |
| 3288 | <b>Jennifer Kawi.</b> Managing CHRONIC PAIN in primary care.. <i>Nurse Practitioner</i> . 2016/03//. 41:14                                                                                                                                                                                                                                                                                                                                               | Level 1, Form Title/abstract screen |
| 3289 | <b>Andrew Day.</b> Commentary on Stuart et al. (2013): Domestic violence and interventions to reduce alcohol use.. <i>Addiction</i> . 2013/08//. 108:1385                                                                                                                                                                                                                                                                                                | Level 1, Form Title/abstract screen |
| 3293 | <b>Larissa Nekhlyudov, Christina Lacchetti, Nancy B. Davis, Thomas Q. Garvey, David P. Goldstein, J. Chris Nunnink, Jose I. Ruades Ninfea, Andrew L. Salner, Talya Salz, Lillian L. Siu, Jose I Ruades Ninfea.</b> Head and Neck Cancer Survivorship Care Guideline: American Society of Clinical Oncology Clinical Practice Guideline Endorsement of the American Cancer Society Guideline.. <i>Journal of Clinical Oncology</i> . 2017/05/10/. 35:1606 | Level 1, Form Title/abstract screen |
| 3294 | <b>O'Connell N.</b> Smoking cessation management must become more individualized.. <i>Nurse Prescribing</i> . 2009/11//. 7:486                                                                                                                                                                                                                                                                                                                           | Level 1, Form Title/abstract screen |
| 3298 | <b>Stacy L. Haber, Virginia Boomershine, Erin Raney.</b> Safety of Varenicline in Patients With Cardiovascular Disease.. <i>Journal of Pharmacy Practice</i> . 2014/02//. 27:65                                                                                                                                                                                                                                                                          | Level 1, Form Title/abstract screen |
| 3299 | <b>Ursula Kelly, Mary Ann Boyd, Sharon M. Valente, Elizabeth Czekanski.</b> Trauma-Informed Care: Keeping Mental Health Settings Safe for Veterans.. <i>Issues in Mental Health Nursing</i> . 2014/06//. 35:413                                                                                                                                                                                                                                          | Level 1, Form Title/abstract screen |
| 3300 | <b>Daniel Z. Lieberman, Anne Cioletti, Suena H. Massey, Rochelle S. Collantes, Brad B. Moore.</b> TREATMENT PREFERENCES AMONG PROBLEM DRINKERS IN PRIMARY CARE.. <i>International Journal of Psychiatry in Medicine</i> . 2014/04//. 47:231                                                                                                                                                                                                              | Level 1, Form Title/abstract screen |
| 3301 | <b>Laura C. Feemster, J. Randall Curtis.</b> "We Understand the Prognosis, but We Live with Our Heads in the Clouds": Understanding Patient and Family Outcome Expectations and Their Influence on Shared Decision Making.. <i>American Journal of Respiratory &amp; Critical Care Medicine</i> . 2016/02//2/1/2016. 193:239                                                                                                                             | Level 1, Form Title/abstract screen |
| 3302 | <b>Pierre Leichner, Carissa Wieler.</b> maladjusted : Participatory theatre about human-centred care.. <i>Arts &amp; Health: International Journal for Research, Policy &amp; Practice</i> . 2015/02//. 7:75                                                                                                                                                                                                                                             | Level 1, Form Title/abstract screen |
| 3304 | <b>Benjamin Doolittle, William Becker.</b> A Case Series of                                                                                                                                                                                                                                                                                                                                                                                              | Level 1, Form                       |

|      |                                                                                                                                                                                                                                                                                                      |                                     |
|------|------------------------------------------------------------------------------------------------------------------------------------------------------------------------------------------------------------------------------------------------------------------------------------------------------|-------------------------------------|
|      | Buprenorphine/Naloxone Treatment in a Primary Care Practice.. <i>Substance Abuse</i> . 2011/10//Oct-Dec2011. 32:262                                                                                                                                                                                  | Title/abstract screen               |
| 3306 | <b>Weisner C,Parthasarathy S,Moore C,Mertens JR</b> . Individuals receiving addiction treatment: are medical costs of their family members reduced?. <i>Addiction</i> . 2010/07//. 105:1226                                                                                                          | Level 1, Form Title/abstract screen |
| 3310 | <b>Jomella Watson-Thompson, Nikki Keene Woods, Daniel J. Schober, Jerry A. Schultz</b> . Enhancing the Capacity of Substance Abuse Prevention Coalitions Through Training and Technical Assistance.. <i>Journal of Prevention &amp; Intervention in the Community</i> . 2013/07//Jul-Sep2013. 41:176 | Level 1, Form Title/abstract screen |
| 3316 | <b>Cory R. Cummings, Kia J. Bentley</b> . Contemporary Health-Related Decision Aids: Tools for Social Work Practice.. <i>Social Work in Health Care</i> . 2014/09//. 53:762                                                                                                                          | Level 1, Form Title/abstract screen |
| 3318 | <b>Joan Trujols, Maria J. Portella, Ioseba Iraurgi, M. Josefa Campins, Núria Siñol, José Pérez de Los Cobos</b> . Patient-reported outcome measures: Are they patient-generated, patient-centred or patient-valued?. <i>Journal of Mental Health</i> . 2013/12//. 22:555                             | Level 1, Form Title/abstract screen |
| 3320 | <b>Mitch Winemaker, Danielle Petrucci, Conrad Kabali, Justin de Beer</b> . Not all total joint replacement patients are created equal: preoperative factors and length of stay in hospital.. <i>Canadian Journal of Surgery</i> . 2015/06//Jun/jun2015. 58:160                                       | Level 1, Form Title/abstract screen |
| 3322 | <b>Thomas SA,Hargett T</b> . Mental health care: a collaborative, holistic approach.. <i>Holistic Nursing Practice</i> . 1999/01//. 13:78                                                                                                                                                            | Level 1, Form Title/abstract screen |
| 3323 | <b>Giovazolias T,Davis P</b> . Matching therapeutic interventions to drug and alcohol abusers' stage of motivation: the clients' perspective.. <i>Counselling Psychology Quarterly</i> . 2005/09//. 18:171                                                                                           | Level 1, Form Title/abstract screen |
| 3325 | <b>G. Dom, M. Wojnar, C.L. Crunelle, N. Thon, J. Bobes, U.W. Preuss, G. Addolorato, H.K. Seitz, F.M. Wurst</b> . Assessing and Treating Alcohol Relapse Risk in Liver Transplantation Candidates.. <i>Alcohol &amp; Alcoholism</i> . 2015/03//. 50:164                                               | Level 1, Form Title/abstract screen |
| 3327 | <b>Joseph M. Cerimele, Anna Ratzliff, Jennifer M. Sexton</b> . Collaborative care for a patient with bipolar disorder in primary care: a case example.. <i>General Hospital Psychiatry</i> . 2015/03//Mar/Apr2015. 37:144                                                                            | Level 1, Form Title/abstract screen |
| 3328 | <b>Paolo Del Vecchio</b> . Bringing Recovery to Practice: Improving Provider Competencies and Promoting Positive Outcomes.. <i>Psychiatric Services</i> . 2015/07//. 66:750                                                                                                                          | Level 1, Form Title/abstract screen |
| 3329 | <b>Nicole P. Yuan, Heide Castañeda, Mark Nichter, Mimi Nichter, Steven Wind, Lauren Carruth, Myra Muramoto</b> . Lay Health Influencers: How They Tailor Brief Tobacco Cessation Interventions.. <i>Health Education &amp; Behavior</i> . 2012/10//. 39:544                                          | Level 2, Form Full Text Screening   |
| 3331 | <b>Sadie Geraghty</b> . Reaching out: caring for women prisoners in Western Australia.. <i>Practising Midwife</i> . 2015/01//. 18:26                                                                                                                                                                 | Level 1, Form Title/abstract screen |
| 3332 | <b>Moyer A,Finney JW</b> . Brief interventions for alcohol problems: factors that facilitate implementation.. <i>Alcohol Research &amp; Health</i> . 2004/03//2004/2005. 28:44                                                                                                                       | Level 1, Form Title/abstract screen |
| 3334 | <b>Amanda Conley</b> . Strengths-Based Nursing Care.. <i>International Journal for Human Caring</i> . 2014/07//. 18:67                                                                                                                                                                               | Level 1, Form Title/abstract screen |

|      |                                                                                                                                                                                                                                                                                                                                                                    |                                     |
|------|--------------------------------------------------------------------------------------------------------------------------------------------------------------------------------------------------------------------------------------------------------------------------------------------------------------------------------------------------------------------|-------------------------------------|
| 3335 | <b>Pamela J. Black, Michael Woodworth, Moreen Tremblay, Tara Carpenter.</b> A Review of Trauma-Informed Treatment for Adolescents.. <i>Canadian Psychology</i> . 2012/08//. 53:192                                                                                                                                                                                 | Level 1, Form Title/abstract screen |
| 3336 | <b>Jennifer B Green.</b> understanding the type 2 diabetes mellitus and cardiovascular disease risk paradox.. <i>Postgraduate Medicine</i> . 2014/05//2014 May. 126:190                                                                                                                                                                                            | Level 1, Form Title/abstract screen |
| 3338 | <b>Aysha Mendes.</b> COPD in the community: working beyond boundaries.. <i>British Journal of Community Nursing</i> . 2014/10//. 19:514                                                                                                                                                                                                                            | Level 1, Form Title/abstract screen |
| 3340 | <b>Karen Y. Frantz.</b> Care, Collaboration, Community for Maternal Opiate Addiction.. <i>JOGNN: Journal of Obstetric, Gynecologic &amp; Neonatal Nursing</i> . 2016/06//Jun2016 Supplement. 45:S6                                                                                                                                                                 | Level 2, Form Full Text Screening   |
| 3341 | <b>S. McIlfratrick, S. Keeney, H. McKenna, N. McCarley, G. McIlwee.</b> Exploring the actual and potential role of the primary care nurse in the prevention of cancer: a mixed methods study.. <i>European Journal of Cancer Care</i> . 2014/05//. 23:288                                                                                                          | Level 1, Form Title/abstract screen |
| 3342 | <b>Malcolm W Battersby, Jill Beattie, Rene G Pols, David P Smith, John Condon, Sarah Blunden.</b> A randomised controlled trial of the Flinders Program™ of chronic condition management in Vietnam veterans with co-morbid alcohol misuse, and psychiatric and medical conditions.. <i>Australian &amp; New Zealand Journal of Psychiatry</i> . 2013/05//. 47:451 | Level 1, Form Title/abstract screen |
| 3344 | <b>Daniela Bundalo-Vrbanac, Danijel Buljan, Vjekoslav Peitl, Josipa Gelo.</b> Integrating psychotherapy and pharmacotherapy in treatment of substance dependence.. <i>Alcoholism: Journal on Alcoholism &amp; Related Addictions</i> . 2012/09//. 48:107                                                                                                           | Level 1, Form Title/abstract screen |
| 3345 | <b>Neville Greaves.</b> The smoking cessation clinic.. <i>Journal of the Acupuncture Association of Chartered Physiotherapists</i> . 2014/09//. 30:105                                                                                                                                                                                                             | Level 1, Form Title/abstract screen |
| 3346 | <b>Masterson A.</b> Community matrons: the value of knowing self (part two). <i>Nursing Older People</i> . 2007/06//. 19:29                                                                                                                                                                                                                                        | Level 1, Form Title/abstract screen |
| 3347 | . Chapter 9: the prenatal assessment.. <i>Maternal-Child Nursing Care: Optimizing Outcomes for Mothers, Children &amp; Families</i> . 2009/01//. #volume#:215                                                                                                                                                                                                      | Level 1, Form Title/abstract screen |
| 3348 | <b>Flannery Fielding, Tanya M. Sanford, Mellar P. Davis.</b> Achieving effective control in cancer pain: a review of current guidelines.. <i>International Journal of Palliative Nursing</i> . 2013/12//. 19:584                                                                                                                                                   | Level 1, Form Title/abstract screen |
| 3349 | <b>Sandeep Grover, Naresh Nebhinani, Subho Chakrabarti, Ruchita Shah, Ajit Avasthi.</b> Relationship between First Treatment Contact and Supernatural Beliefs in Caregivers of Patients with Schizophrenia.. <i>East Asian Archives of Psychiatry</i> . 2014/06//. 24:58                                                                                           | Level 1, Form Title/abstract screen |
| 3350 | . Treatment programs appear eager to leave no possible client behind...[corrected][published erratum appears in ALCOHOL DRUG ABUSE WKLY 2013 Jul 22; 25(28): 7]. <i>Alcoholism &amp; Drug Abuse Weekly</i> . 2013/07/15/. 25:1                                                                                                                                     | Level 1, Form Title/abstract screen |
| 3352 | <b>Mendez D, Jacobson PD, Hassmiller KM, Zellman GL.</b> The effect of legal and hospital policies on physician response to prenatal substance exposure.. <i>Maternal &amp; Child Health Journal</i> . 2003/09//. 7:187                                                                                                                                            | Level 1, Form Title/abstract screen |
| 3353 | <b>Decker S, Cary P, Krautscheid L.</b> From the streets to assisted living:                                                                                                                                                                                                                                                                                       | Level 1, Form                       |

|      |                                                                                                                                                                                                                                                                                                                                                        |                                        |
|------|--------------------------------------------------------------------------------------------------------------------------------------------------------------------------------------------------------------------------------------------------------------------------------------------------------------------------------------------------------|----------------------------------------|
|      | perceptions of a vulnerable population.. <i>Journal of Psychosocial Nursing &amp; Mental Health Services</i> . 2006/06//. 44:18                                                                                                                                                                                                                        | Title/abstract screen                  |
| 3354 | <b>Marcus MT, Walker T, Swint JM, Smith BP, Brown C, Busen N, Edwards T, Liehr P, Taylor WC, Williams D, Von Sternberg K.</b> Community-based participatory research to prevent substance abuse and HIV/AIDS in African-American adolescents.. <i>Journal of Interprofessional Care</i> . 2004/11//. 18:347                                            | Level 1, Form<br>Title/abstract screen |
| 3355 | <b>Anderson JE, Larke SC.</b> The Sooke Navigator project: using community resources and research to improve local service for mental health and addictions.. <i>Mental Health in Family Medicine</i> . 2009/03//. 6:21                                                                                                                                | Level 1, Form<br>Title/abstract screen |
| 3356 | <b>Anderson JE, Larke SC.</b> Navigating the mental health and addictions maze: a community-based pilot project of a new role in primary mental health care.. <i>Mental Health in Family Medicine</i> . 2009/03//. 6:15                                                                                                                                | Level 1, Form<br>Title/abstract screen |
| 3360 | <b>Evan Senreich.</b> Lesbian, Gay, and Bisexual Clients in a Substance Abuse Treatment Program Serving a Mostly Black and Hispanic Population.. <i>Journal of LGBT Issues in Counseling</i> . 2012/10//Oct-Dec2012. 6:310                                                                                                                             | Level 1, Form<br>Title/abstract screen |
| 3363 | <b>Linda S. Beeber, Madeline A. Naegle, Geraldine S. Pearson, Rebecca E. Salomon.</b> Health Needs of Persons With Mental Disorders.. <i>Journal of the American Psychiatric Nurses Association</i> . 2016/07//Jul/Aug2016. 22:287                                                                                                                     | Level 1, Form<br>Title/abstract screen |
| 3364 | <b>Cecilia Pompili.</b> Quality of life after lung resection for lung cancer.. <i>Journal of Thoracic Disease</i> . 2015/04//2015 Supplement 2. 7:S138                                                                                                                                                                                                 | Level 1, Form<br>Title/abstract screen |
| 3365 | <b>Ryan Kemp.</b> The symbolic constitution of addiction: Language, alienation, ambivalence.. <i>Health: An Interdisciplinary Journal for the Social Study of Health, Illness &amp; Medicine</i> . 2012/07/15/. 16:434                                                                                                                                 | Level 1, Form<br>Title/abstract screen |
| 3368 | . UPFRONT: Roundup. 4M for research to combat drug abuse.. <i>Canadian Chiropractor</i> . 2016/04//. 21:8                                                                                                                                                                                                                                              | Level 1, Form<br>Title/abstract screen |
| 3370 | <b>Marianna Fontana, Perviz Asaria, Michela Moraldo, Judith Finegold, Khalil Hassanally, Charlotte H Manisty, Darrel P Francis.</b> Patient-accessible tool for shared decision making in cardiovascular primary prevention: balancing longevity benefits against medication disutility.. <i>Circulation</i> . 2014/06/17/. 129:2539                   | Level 1, Form<br>Title/abstract screen |
| 3371 | <b>Michael W Drazer, Sandip M Prasad, Dezheng Huo, Mara A Schonberg, William Dale, Russell Z Szmulewitz, Scott E Eggener.</b> National trends in prostate cancer screening among older American men with limited 9-year life expectancies: Evidence of an increased need for shared decision making.. <i>Cancer (0008543X)</i> . 2014/05/15/. 120:1491 | Level 1, Form<br>Title/abstract screen |
| 3375 | <b>Sarah McMahon, Rachel Schwartz.</b> A Review of Rape in the Social Work Literature: A Call to Action.. <i>Affilia: Journal of Women &amp; Social Work</i> . 2011/08//. 26:250                                                                                                                                                                       | Level 1, Form<br>Title/abstract screen |
| 3376 | <b>Shirley A. Murphy.</b> Interdisciplinary Education in the Addictions.. <i>Journal of Addictions Nursing (Lippincott Williams &amp; Wilkins)</i> . 2013/03//Jan-Mar2013. 24:4                                                                                                                                                                        | Level 1, Form<br>Title/abstract screen |
| 3377 | <b>Robin P Newhouse, Cheryl Dennison Himmelfarb, Laura Morlock, Kevin D Frick, Peter Pronovost, Yulan Liang.</b> A Phased Cluster-randomized Trial of Rural Hospitals Testing a Quality Collaborative to Improve Heart Failure Care: Organizational Context Matters.. <i>Medical Care</i> . 2013/05//2013 May. 51:396                                  | Level 1, Form<br>Title/abstract screen |
| 3378 | <b>Margrethe Smidth.</b> Integrated Care for people who want Alcohol                                                                                                                                                                                                                                                                                   | Level 1, Form                          |

|      |                                                                                                                                                                                                                                                                                                                                                                                                                                                                                                            |                                     |
|------|------------------------------------------------------------------------------------------------------------------------------------------------------------------------------------------------------------------------------------------------------------------------------------------------------------------------------------------------------------------------------------------------------------------------------------------------------------------------------------------------------------|-------------------------------------|
|      | Detoxification in the middle of Denmark.. <i>International Journal of Integrated Care (IJIC)</i> . 2016/12/02/2016 Supplement. 16:1                                                                                                                                                                                                                                                                                                                                                                        | Title/abstract screen               |
| 3379 | <b>Varela TA, Montbach J, Shipe S.</b> Psychoactive medication adherence in substance users living with HIV/AIDS.. <i>Journal of Addictions Nursing (Taylor &amp; Francis Ltd)</i> . 2007/03//. 18:5                                                                                                                                                                                                                                                                                                       | Level 1, Form Title/abstract screen |
| 3380 | <b>Wei-Chen Tung, Maureen Barnes.</b> Heart Diseases Among Native Hawaiians and Pacific Islanders.. <i>Home Health Care Management &amp; Practice</i> . 2014/05//. 26:110                                                                                                                                                                                                                                                                                                                                  | Level 1, Form Title/abstract screen |
| 3381 | <b>Gabriela Novotná.</b> Competing institutional logics in the development and implementation of integrated treatment for concurrent disorders in Ontario: A case study.. <i>Journal of Social Work</i> . 2014/05//. 14:260                                                                                                                                                                                                                                                                                | Level 2, Form Full Text Screening   |
| 3382 | <b>Malaika Mutere, Adeline Nyamathi, Ashley Christiani, Jeff Sweat, Glenna Avila, Leo Hobaica.</b> Homeless Youth Seeking Health and Life-Meaning Through Popular Culture and the Arts.. <i>Child &amp; Youth Services</i> . 2014/07//Jul-Sep2014. 35:273                                                                                                                                                                                                                                                  | Level 1, Form Title/abstract screen |
| 3383 | <b>Cynthia Reade, Rosemary Nourse.</b> RESEARCH CORNER. Intervening to prevent violence in psychiatric units.. <i>Nursing</i> . 2012/07//. 42:14                                                                                                                                                                                                                                                                                                                                                           | Level 1, Form Title/abstract screen |
| 3385 | <b>Ann B. Smith, Michelle Odum, Manik Sikka, Suzanne Bakken, Tim Kanter.</b> Patient Perceptions of Pre-Implementation of Personal Health Records (PHRs): A Qualitative Study of People Living With HIV in New York City.. <i>Journal of HIV/AIDS &amp; Social Services</i> . 2012/10//Oct-Dec2012. 11:406                                                                                                                                                                                                 | Level 1, Form Title/abstract screen |
| 3387 | <b>Deborah Bailey, Samir Pathak, Niaz Ahmad.</b> Is liver transplant for alcohol-related end-stage liver disease appropriate?.. <i>British Journal of Hospital Medicine (17508460)</i> . 2013/08//. 74:439                                                                                                                                                                                                                                                                                                 | Level 1, Form Title/abstract screen |
| 3388 | <b>Hilary Connery, Shelly Greenfield, Viktoriya Livchits, Lana McGrady, Nickolette Patrick, Charmaine S. Lastimoso, Jessica H. Heney, Adrienne Katrina Nelson, Alan Shields, Yekaterina P. Stepanova, Lidia Y. Petrova, Oleg V. Anastasov, Olga I. Novoseltseva, Sonya S. Shin.</b> Training and Fidelity Monitoring of Alcohol Treatment Interventions Integrated Into Routine Tuberculosis Care in Tomsk, Russia: the IMPACT Effectiveness Trial.. <i>Substance Use &amp; Misuse</i> . 2013/07//. 48:806 | Level 2, Form Full Text Screening   |
| 3391 | <b>Akhavain P, Amaral D, Murphy M, Uehlinger KC.</b> Collaborative practice: a nursing perspective of the psychiatric interdisciplinary treatment team.. <i>Holistic Nursing Practice</i> . 1999/01//. 13:1                                                                                                                                                                                                                                                                                                | Level 1, Form Title/abstract screen |
| 3392 | <b>Michelle Morris, Carmel Seibold, Ruth Webber.</b> Drugs and having babies: An exploration of how a specialist clinic meets the needs of chemically dependent pregnant women.. <i>Midwifery</i> . 2012/04//. 28:163                                                                                                                                                                                                                                                                                      | Level 2, Form Full Text Screening   |
| 3395 | . Best treatments for young people with heroin addiction: No rule book.. <i>Alcoholism &amp; Drug Abuse Weekly</i> . 2013/04/29/. 25:1                                                                                                                                                                                                                                                                                                                                                                     | Level 1, Form Title/abstract screen |
| 3397 | <b>William J. Doherty, Susan H. McDaniel, Jeri Hepworth.</b> Contributions of Medical Family Therapy to the Changing Health Care System.. <i>Family Process</i> . 2014/09//. 53:529                                                                                                                                                                                                                                                                                                                        | Level 1, Form Title/abstract screen |
| 3401 | <b>Hussein A Tahan, Patrice V Schminkey.</b> Motivational Interviewing: Building Rapport With Clients to Encourage Desirable Behavioral and Lifestyle Changes...ceu ex pg 173-4. <i>Professional Case Management</i> . 2012/07//2012 Jul-Aug. 17:164                                                                                                                                                                                                                                                       | Level 1, Form Title/abstract screen |
| 3403 | <b>Dennis KW, Lourie IS.</b> Everything is normal until proven otherwise..                                                                                                                                                                                                                                                                                                                                                                                                                                 | Level 1, Form                       |

|      |                                                                                                                                                                                                                                                                                |                                        |
|------|--------------------------------------------------------------------------------------------------------------------------------------------------------------------------------------------------------------------------------------------------------------------------------|----------------------------------------|
|      | <i>Children's Voice</i> . 2006/11//Nov/Dec2006. 15:38                                                                                                                                                                                                                          | Title/abstract screen                  |
| 3404 | . Substance use must be included in electronic patient records: Study..<br><i>Alcoholism &amp; Drug Abuse Weekly</i> . 2012/01/23/. 24:1                                                                                                                                       | Level 1, Form<br>Title/abstract screen |
| 3405 | <b>Scrandis DA,Fauchald SK,Radsma J</b> . Global gendercide: interwoven threats to women's health and nursing obligations..<br><i>Journal of Multicultural Nursing &amp; Health (JMCNH)</i> . 2004//Winter2004. 10:7                                                           | Level 1, Form<br>Title/abstract screen |
| 3406 | <b>VanderSchie-Bezyak JL</b> . Service problems and solutions for individuals with mental retardation and mental illness..<br><i>Journal of Rehabilitation</i> . 2003/01//Jan-Mar2003. 69:53                                                                                   | Level 1, Form<br>Title/abstract screen |
| 3407 | <b>Marcus MT,Gerace LM,Sullivan EJ</b> . Enhancing nursing competence with substance abusing clients..<br><i>Journal of Nursing Education</i> . 1996/11//. 35:361                                                                                                              | Level 1, Form<br>Title/abstract screen |
| 3409 | <b>Rassool GH</b> . Prescription for change: perspectives on prescribing authority for addiction nurses in the United Kingdom..<br><i>Journal of Addictions Nursing (Taylor &amp; Francis Ltd)</i> . 2004/12//. 15:193                                                         | Level 1, Form<br>Title/abstract screen |
| 3410 | <b>Sara Faithfull, Cathy Burton, Sinead Clarke, Mike Kirby, Alex Lyon, Gill Levitt, Karen Poole, Fiona Walter</b> . Mitigating risk of cardiovascular disease in people living with and beyond cancer..<br><i>Cancer Nursing Practice</i> . 2017/02//. 16:18                   | Level 1, Form<br>Title/abstract screen |
| 3414 | <b>Harold Alan Pincus, Brigitta Spaeth-Rublee, Katherine E. Watkins</b> . The Case For Measuring Quality In Mental Health And Substance Abuse Care..<br><i>Health Affairs</i> . 2011/04//. 30:730                                                                              | Level 1, Form<br>Title/abstract screen |
| 3415 | <b>Luann Richardson</b> . Motivational Interviewing: Helping Patients Move Toward Change..<br><i>Journal of Christian Nursing</i> . 2012/01//Jan-Mar2012. 29:18                                                                                                                | Level 1, Form<br>Title/abstract screen |
| 3418 | <b>Woods ER,Samples CL,Melchiono MW,Keenan PM,Fox DJ,Harris SK</b> . Initiation of services in the Boston HAPPENS Program: human immunodeficiency virus-positive, homeless, and at-risk youth can access services..<br><i>AIDS Patient Care &amp; STDs</i> . 2002/10//. 16:497 | Level 1, Form<br>Title/abstract screen |
| 3420 | <b>Anika Kristin Boyd</b> . A Nurse-Led Intervention to Improve Chronic Non-Cancer Pain..<br><i>Nurse-Led Intervention to Improve Chronic Non-Cancer Pain</i> . 2017/01//. #volume#:1                                                                                          | Level 1, Form<br>Title/abstract screen |
| 3423 | <b>Vivek Shetty, Gran N Marshall</b> . Collaborative Care of the Facial Injury Patient..<br><i>Perioperative Nursing Clinics</i> . 2011/12//2011 Dec. 6:xi                                                                                                                     | Level 1, Form<br>Title/abstract screen |
| 3424 | <b>Lisa Goldsmith</b> . Counselling smokers..<br><i>Pharmacy News</i> . 2012/07//. #volume#:39                                                                                                                                                                                 | Level 1, Form<br>Title/abstract screen |
| 3427 | <b>Jones A</b> . Clinical. Causes and effects of chronic obstructive pulmonary disease..<br><i>British Journal of Nursing</i> . 2001/07/12/. 10:845                                                                                                                            | Level 1, Form<br>Title/abstract screen |
| 3428 | <b>Scott DeMuro, Kenneth Wanberg, Rachel Anderson</b> . Driving While Impaired (DWI) Intervention Service Provider Orientations: The Scales of the DWI Therapeutic Educator Inventory (DTEI).<br><i>Substance Abuse</i> . 2011/10//Oct-Dec2011. 32:225                         | Level 1, Form<br>Title/abstract screen |
| 3431 | <b>Jennifer DiPiazza</b> . The Lived Experience of Maintaining Cigarette Smoking Cessation for a Year or More: Implications for Nursing Practice...28th Annual                                                                                                                 | Level 1, Form<br>Title/abstract        |

|      |                                                                                                                                                                                                                                                                                                                                                          |                                     |
|------|----------------------------------------------------------------------------------------------------------------------------------------------------------------------------------------------------------------------------------------------------------------------------------------------------------------------------------------------------------|-------------------------------------|
|      | Scientific Session, June 2-6, 2017, Baltimore, Maryland. <i>Nursing Research</i> . 2016/03//Mar/Apr2016. 65:E6                                                                                                                                                                                                                                           | screen                              |
| 3432 | <b>Niven JA.</b> Client-centered, culture-friendly behavioral health care techniques for work with Alaska natives in the bering strait region.. <i>Social Work in Mental Health</i> . 2010/07//Jul/Aug2010. 8:398                                                                                                                                        | Level 2, Form Full Text Screening   |
| 3435 | <b>Bonner JE,Barritt AS 4th,Fried MW,Evon DM, Jason E Bonner, A Sidney 4th Barritt, Michael W Fried, Donna M Evon.</b> Time to rethink antiviral treatment for hepatitis C in patients with coexisting mental health/substance abuse issues.. <i>Digestive Diseases &amp; Sciences</i> . 2012/06//. 57:1469                                              | Level 1, Form Title/abstract screen |
| 3437 | . Research Briefs.. <i>AHRQ Research Activities</i> . 2012/10//. #volume#:29                                                                                                                                                                                                                                                                             | Level 1, Form Title/abstract screen |
| 3441 | <b>George M, Maureen George.</b> Health beliefs, treatment preferences and complementary and alternative medicine for asthma, smoking and lung cancer self-management in diverse Black communities.. <i>Patient Education &amp; Counseling</i> . 2012/12//. 89:489                                                                                       | Level 1, Form Title/abstract screen |
| 3445 | <b>Allison R. Gilbert, Joseph P. Morrissey, Marisa E. Domino.</b> Service Utilization Patterns as Predictors of Response to Trauma-Informed Integrated Treatment for Women With Co-occurring Disorders.. <i>Journal of Dual Diagnosis</i> . 2011/07//Jul-Sep2011. 7:117                                                                                  | Level 1, Form Title/abstract screen |
| 3448 | <b>Alison Evans Cuellar, Jehanzeb Cheema.</b> As Roughly 700,000 Prisoners Are Released Annually, About Half Will Gain Health Coverage And Care Under Federal Laws.. <i>Health Affairs</i> . 2012/05//. 31:931                                                                                                                                           | Level 1, Form Title/abstract screen |
| 3449 | <b>Karen Davis-Brown, Naeemah Carter, Bethany D Miller.</b> Youth advisors driving action: hearing the youth voice in mental health systems of care...CE exam 44-5. <i>Journal of Psychosocial Nursing &amp; Mental Health Services</i> . 2012/03//. 50:39                                                                                               | Level 1, Form Title/abstract screen |
| 3452 | <b>Matheson GO,Klügl M,Dvorak J,Engebretsen L,Meeuwisse WH,Schwellnus M,Blair SN,van Mechelen W,Derman W,Börjesson M,Bendiksen F,Weiler R.</b> Responsibility of sport and exercise medicine in preventing and managing chronic disease: applying our knowledge and skill is overdue.. <i>British Journal of Sports Medicine</i> . 2011/12/15/. 45:1272  | Level 1, Form Title/abstract screen |
| 3455 | <b>Ford C,Oliver J,Whitehead B.</b> Treating drug users: a collaborative method.. <i>Therapy Today</i> . 2006/03//. 17:17                                                                                                                                                                                                                                | Level 1, Form Title/abstract screen |
| 3456 | <b>Ulla Timlin, Kaisa Riala, Helvi Kyngäs.</b> Adherence to treatment among adolescents in a psychiatric ward.. <i>Journal of Clinical Nursing</i> . 2013/05//. 22:1332                                                                                                                                                                                  | Level 1, Form Title/abstract screen |
| 3457 | <b>Frances J. Kay-Lambkin, Amanda L. Baker, Brian J. Kelly, Terry J. Lewin.</b> It's Worth a Try: The Treatment Experiences of Rural and Urban Participants in a Randomized Controlled Trial of Computerized Psychological Treatment for Comorbid Depression and Alcohol/Other Drug Use.. <i>Journal of Dual Diagnosis</i> . 2012/11//Oct-Dec2012. 8:262 | Level 1, Form Title/abstract screen |
| 3459 | <b>Karen-leigh Edward, Rhonda Nelson Hearity, Boycer Felstead.</b> Service integration for the dually diagnosed.. <i>Australian Journal of Primary Health</i> . 2012/03//. 18:17                                                                                                                                                                         | Level 1, Form Title/abstract screen |
| 3462 | <b>Center BH.</b> Grappling with a hard case: assessment and case management of the substance abuse patient.. <i>Case in Point</i> . 2009/08//2009 Aug-Sep. 7:44                                                                                                                                                                                         | Level 1, Form Title/abstract screen |



|      |                                                                                                                                                                                                                                                                                                  |                                           |
|------|--------------------------------------------------------------------------------------------------------------------------------------------------------------------------------------------------------------------------------------------------------------------------------------------------|-------------------------------------------|
| 3463 | <b>Croghan E,Johnson C.</b> Supporting smoking cessation and dietary change..<br><i>Nursing Standard.</i> 2005/04/27/. 19:52                                                                                                                                                                     | Level 1, Form<br>Title/abstract<br>screen |
| 3465 | <b>Knight DK,Edwards JR,Flynn PM.</b> Predictors of change in the provision of services within outpatient substance abuse treatment programs..<br><i>Journal of Public Health Management &amp; Practice.</i> 2010/11//2010 Nov-Dec. 16:553                                                       | Level 1, Form<br>Title/abstract<br>screen |
| 3467 | <b>Amy Endee.</b> Characterizing a new mindset for substance use professionals..<br><i>Addiction Professional.</i> 2014/11//Nov/Dec2014. 12:8                                                                                                                                                    | Level 1, Form<br>Title/abstract<br>screen |
| 3469 | <b>LEWIS M,ALLEN H,WARR J.</b> The development and implementation of a nurse-led hepatitis C protocol for people with serious mental health problems..<br><i>Journal of Psychiatric &amp; Mental Health Nursing.</i> 2010/09//. 17:651                                                           | Level 1, Form<br>Title/abstract<br>screen |
| 3470 | . New Jersey nonprofit emphasizes expansion of its capabilities..<br><i>Alcoholism &amp; Drug Abuse Weekly.</i> 2012/04/02/. 24:1                                                                                                                                                                | Level 1, Form<br>Title/abstract<br>screen |
| 3471 | . Center blends improvement efforts to sharpen methadone, detox care..<br><i>Alcoholism &amp; Drug Abuse Weekly.</i> 2012/01/23/. 24:1                                                                                                                                                           | Level 1, Form<br>Title/abstract<br>screen |
| 3472 | <b>Duran B,Harrison M,Shurley M,Foley K,Morris P,Davidson-Stroh L,Iralu J,Jiang Y,Andrasik MP.</b> Tribally-driven HIV/AIDS health services partnerships: evidence-based meets culture-centered interventions..<br><i>Journal of HIV/AIDS &amp; Social Services.</i> 2010/04//Apr-Jun2010. 9:110 | Level 1, Form<br>Title/abstract<br>screen |
| 3473 | . Answer/evaluation form: Nursing care for the patient with co-existing pain and substance misuse: meeting the patient's needs..<br><i>MEDSURG Nursing.</i> 2010/01//Jan/Feb2010. 19:31                                                                                                          | Level 1, Form<br>Title/abstract<br>screen |
| 3474 | <b>Balachandra K,Petrakis I.</b> Setting up a buprenorphine clinic: one year later..<br><i>Addictive Disorders &amp; Their Treatment.</i> 2005/09//. 4:111                                                                                                                                       | Level 1, Form<br>Title/abstract<br>screen |
| 3475 | <b>Peter J Mazzone, Amanda Tenenbaum, Meredith Seeley, Hilary Petersen, Christina Lyon, Xiaozhen Han, Xiao-Feng Wang.</b> Impact of a Lung Cancer Screening Counseling and Shared Decision-Making Visit..<br><i>CHEST.</i> 2016/11//. 150:N.PAG                                                  | Level 1, Form<br>Title/abstract<br>screen |
| 3478 | <b>Connie Miyao.</b> EXPANDING THE REACH OF TOBACCO CESSATION STRATEGIES..<br><i>Oregon Nurse.</i> 2013/02//. #volume#:13                                                                                                                                                                        | Level 1, Form<br>Title/abstract<br>screen |
| 3480 | <b>Jane Meschan Foy.</b> The Medical Home and Integrated Behavioral Health..<br><i>Pediatrics.</i> 2015/05//. 135:930                                                                                                                                                                            | Level 1, Form<br>Title/abstract<br>screen |
| 3482 | <b>Rossiter R,Black J.</b> Challenging therapeutic pessimism: borderline personality disorder and co-morbid substance abuse..<br><i>Mental Health &amp; Substance Use: Dual Diagnosis.</i> 2009/06//. 2:140                                                                                      | Level 1, Form<br>Title/abstract<br>screen |
| 3483 | <b>Nancy Murphy.</b> Advancing the Interdisciplinary Collaborative Health Team Model: Professionalism, Implementation Science, and Therapeutic Alliance to Enact Social Justice Practice..<br><i>Advances in Nursing Science.</i> 2015/07//Jul-Sep2015. 38:215                                   | Level 1, Form<br>Title/abstract<br>screen |
| 3484 | <b>Lantz MS.</b> Helping an older man quit smoking..<br><i>Clinical Geriatrics.</i> 2010/07//2010 Jul-Aug. 18:32                                                                                                                                                                                 | Level 1, Form<br>Title/abstract<br>screen |

|      |                                                                                                                                                                                                                                                                                                                                                                        |                                           |
|------|------------------------------------------------------------------------------------------------------------------------------------------------------------------------------------------------------------------------------------------------------------------------------------------------------------------------------------------------------------------------|-------------------------------------------|
| 3485 | . Study urges anti-burnout aid for intensive care nurses.. <i>Nursing Standard</i> . 2016/07/20/. 30:10                                                                                                                                                                                                                                                                | Level 1, Form<br>Title/abstract<br>screen |
| 3486 | <b>Andis Robeznieks</b> . Aiming to provide concierge care ‘for the masses’ ...Feinberg, David. <i>Modern Healthcare</i> . 2015/09/14/. 45:0030                                                                                                                                                                                                                        | Level 1, Form<br>Title/abstract<br>screen |
| 3490 | <b>Susan Kreitz, Mischelle Knipe</b> . An Ethical Perspective of Pain Management.. <i>Minnesota Nursing Accent</i> . 2013///Winter2013. 85:19                                                                                                                                                                                                                          | Level 1, Form<br>Title/abstract<br>screen |
| 3491 | <b>Kathleen Sciacca</b> . A language for integrated care.. <i>Behavioral Healthcare</i> . 2012/11//Nov/Dec2012. 32:24                                                                                                                                                                                                                                                  | Level 1, Form<br>Title/abstract<br>screen |
| 3496 | <b>Mercer SO</b> . Navajo elderly people in a reservation nursing home: admission predictors and culture care practices.. <i>Social Work</i> . 1996/03//. 41:181                                                                                                                                                                                                       | Level 1, Form<br>Title/abstract<br>screen |
| 3497 | <b>Roes NA</b> . No single path to addressing trauma.. <i>Addiction Professional</i> . 2010/11//Nov/Dec2010. 8:30                                                                                                                                                                                                                                                      | Level 1, Form<br>Title/abstract<br>screen |
| 3499 | <b>David Oslin</b> . Personalized Addiction Treatment: How Close Are We?. <i>Alcohol &amp; Alcoholism</i> . 2011/05//May/Jun2011. 46:231                                                                                                                                                                                                                               | Level 1, Form<br>Title/abstract<br>screen |
| 3501 | <b>Shannon Bourke</b> . Drinking In Nevada: the Nursing Solution.. <i>Nevada RNformation</i> . 2012/08//. 21:12                                                                                                                                                                                                                                                        | Level 1, Form<br>Title/abstract<br>screen |
| 3503 | <b>Malcolm Battersby, Michael Von Korff, Judith Schaefer, Connie Davis, Evette Ludman, Sarah M. Greene, Melissa Parkerton, Edward H. Wagner</b> . Twelve evidence-based principles for implementing self-management support in primary care.. <i>Joint Commission Journal on Quality &amp; Patient Safety</i> . 2010/12//2010 Dec. 36:561                              | Level 1, Form<br>Title/abstract<br>screen |
| 3504 | <b>Delacroix J, Brown J, Kadenhe-Chiweshe A, Bodenstein L, Stimell-Rauch M, Lowe T</b> . Rectal perforation secondary to rape and fisting in a female adolescent.. <i>Pediatric Emergency Care</i> . 2011/02//2011 Feb. 27:116                                                                                                                                         | Level 1, Form<br>Title/abstract<br>screen |
| 3505 | . Minnesota Nurses Advocate for a Monitoring Bill that Supports Nurses and Patient Safety.. <i>Minnesota Nursing Accent</i> . 2014///Spring2014. 86:12                                                                                                                                                                                                                 | Level 1, Form<br>Title/abstract<br>screen |
| 3506 | <b>Alakeson V, Frank RG, Katz RE</b> . Specialty care medical homes for people with severe, persistent mental disorders.. <i>Health Affairs</i> . 2010/05//. 29:867                                                                                                                                                                                                    | Level 1, Form<br>Title/abstract<br>screen |
| 3509 | <b>R. Gary Sibbald, Laurie Goodman, Kevin Y. Woo, Diane L. Krasner, Hiske Smart, Gulnaz Tariq, Elizabeth A. Ayello, Robert E. Burrell, David H. Keast, Dieter Mayer, Linda Norton, Richard 'Sal' Salcido</b> . Special considerations in wound bed preparation 2011: an update.. <i>World Council of Enterostomal Therapists Journal</i> . 2012/04//Apr-Jun2012. 32:10 | Level 1, Form<br>Title/abstract<br>screen |
| 3510 | <b>Adam Simning, Yeates Conwell, Susan G Fisher, Thomas M Richardson, Edwin van Wijngaarden</b> . The characteristics of anxiety and depression symptom severity in older adults living in public housing.. <i>International Psychogeriatrics</i> . 2012/04/22/. 24:614                                                                                                | Level 1, Form<br>Title/abstract<br>screen |
| 3513 | <b>Michelle Cleary, Catherine Hungerford</b> . Trauma-informed Care and the Research Literature: How Can the Mental Health Nurse Take the Lead to                                                                                                                                                                                                                      | Level 1, Form<br>Title/abstract           |

|      |                                                                                                                                                                                                                                                                                           |                                     |
|------|-------------------------------------------------------------------------------------------------------------------------------------------------------------------------------------------------------------------------------------------------------------------------------------------|-------------------------------------|
|      | Support Women Who Have Survived Sexual Assault?. <i>Issues in Mental Health Nursing</i> . 2015/05//. 36:370                                                                                                                                                                               | screen                              |
| 3514 | <b>Haug NA,Sorensen JL,Gruber VA,Lollo N,Roth G.</b> HAART adherence strategies for methadone clients who are HIV-positive: a treatment manual for implementing contingency management and medication coaching.. <i>Behavior Modification</i> . 2006/11//. 30:752                         | Level 1, Form Title/abstract screen |
| 3517 | <b>William R. Miller.</b> Sacred Cows and Greener Pastures: Reflections from 40 Years in Addiction Research.. <i>Alcoholism Treatment Quarterly</i> . 2016/01//Jan-Mar2016. 34:92                                                                                                         | Level 2, Form Full Text Screening   |
| 3519 | <b>Leslie O'Neill.</b> Comprehensive Risk Counseling Services (CRCS) at HIV specialty clinics in New Hampshire.. <i>Health Education Monograph Series</i> . 2011/09//. 28:64                                                                                                              | Level 1, Form Title/abstract screen |
| 3520 | <b>Taylor-Young P,Hildebrandt E.</b> The multidimensional burden of hepatitis C and its treatment: a case study.. <i>Gastroenterology Nursing</i> . 2009/05//2009 May-Jun. 32:180                                                                                                         | Level 1, Form Title/abstract screen |
| 3522 | <b>Hellard ME,Nguyen OK,Guy RJ,Jardine D,Mijch A,Higgs PG.</b> The prevalence and risk behaviours associated with the transmission of blood-borne viruses among ethnic-Vietnamese injecting drug users.. <i>Australian &amp; New Zealand Journal of Public Health</i> . 2006/12//. 30:519 | Level 1, Form Title/abstract screen |
| 3528 | <b>Gary A. Enos.</b> Multiple disabilities, multiple strategies.. <i>Addiction Professional</i> . 2012/01//Jan/Feb2012. 10:29                                                                                                                                                             | Level 1, Form Title/abstract screen |
| 3529 | <b>Chua HF,Polk T,Welsh R,Liberzon I,Strecher V.</b> Annual review of cybertherapy and telemedicine 2009. Neural responses to elements of a Web-based smoking cessation program.. <i>Studies in Health Technology &amp; Informatics</i> . 2009/03//. 144:174                              | Level 1, Form Title/abstract screen |
| 3531 | <b>Schatzberg AF,Weiss RD,Brady KT,Culpepper L.</b> Bridging the clinical gap: managing patients with co-occurring mood, anxiety, and alcohol use disorders.. <i>Primary Psychiatry</i> . 2008/04/02/April 2008 Expert Review. 15:1                                                       | Level 1, Form Title/abstract screen |
| 3532 | <b>Rash EM.</b> Clinicians' perspectives on motivational interviewing-based brief interventions in college health.. <i>Journal of American College Health</i> . 2008/11//Nov/Dec2008. 57:379                                                                                              | Level 1, Form Title/abstract screen |
| 3535 | <b>Lacey Lacey.</b> Interventions in alcohol use.. <i>Independent Nurse</i> . 2012/05/07/. #volume#:1                                                                                                                                                                                     | Level 1, Form Title/abstract screen |
| 3537 | . Noticeboard.. <i>Nursing Older People</i> . 2015/11//. 27:12                                                                                                                                                                                                                            | Level 1, Form Title/abstract screen |
| 3538 | <b>Andy McLachlan, Andrew Kerr, Mildred Lee, Nicola Dalbeth.</b> Nurse-led cardiovascular disease risk management intervention for patients with gout.. <i>European Journal of Cardiovascular Nursing</i> . 2011/06//. 10:94                                                              | Level 1, Form Title/abstract screen |
| 3540 | <b>Mark Sanders.</b> A Recovery Revolution: Integrating the Addictions and Mental Health Recovery Movements.. <i>Addiction Professional</i> . 2011/09//Sep/Oct2011. 9:N3                                                                                                                  | Level 1, Form Title/abstract screen |
| 3543 | <b>Finney JW.</b> Commentary. Matching clients to psychosocial treatments: at the cusp of hope and evidence?. <i>Addiction</i> . 2008/02//. 103:239                                                                                                                                       | Level 1, Form Title/abstract screen |
| 3544 | <b>Mitchell AM,Dewey CM.</b> Chronic pain in patients with substance abuse disorder: general guidelines and an approach to treatment.. <i>Postgraduate</i>                                                                                                                                | Level 1, Form Title/abstract        |

|      |                                                                                                                                                                                                                                                                                                                                                                                                      |                                           |
|------|------------------------------------------------------------------------------------------------------------------------------------------------------------------------------------------------------------------------------------------------------------------------------------------------------------------------------------------------------------------------------------------------------|-------------------------------------------|
|      | <i>Medicine</i> . 2008/04//2008 Apr. 120:75                                                                                                                                                                                                                                                                                                                                                          | screen                                    |
| 3548 | <b>Kamholz BW,Gulliver SB,Morissette SB</b> . Revisiting the bioinformational model of tobacco dependence: specific application to psychiatric populations..<br><i>Journal of Dual Diagnosis</i> . 2006/09//. 2:19                                                                                                                                                                                   | Level 1, Form<br>Title/abstract<br>screen |
| 3550 | <b>Allen S,Beech AR</b> . Exploring factors that influence nurses: judgements of violence risk in a female forensic population..<br><i>British Journal of Forensic Practice</i> . 2010/02//. 12:4                                                                                                                                                                                                    | Level 1, Form<br>Title/abstract<br>screen |
| 3552 | <b>Bonnie Bristow, Lisa Di Prospero, Elaine Curle, Leslie Gibson, Arlene Court, Andrea Eisen, Marg Fitch</b> . Perceptions of Receptivity: Exploring Tobacco Use and Smoking Cessation Best Practices from the Perspectives of Individuals with Lung Cancer and Health Care Professionals: Findings from Phase I..<br><i>Journal of Medical Imaging &amp; Radiation Sciences</i> . 2014/06//. 45:168 | Level 1, Form<br>Title/abstract<br>screen |
| 3553 | <b>Capoccia VA,Cotter F,Gustafson DH,Cassidy EF,Ford JH II,Madden L,Owens BH,Farnum SO,McCarty D,Molfenter T</b> . Making 'stone soup': improvements in clinic access and retention in addiction treatment..<br><i>Joint Commission Journal on Quality &amp; Patient Safety</i> . 2007/02//2007 Feb. 33:95                                                                                           | Level 1, Form<br>Title/abstract<br>screen |
| 3558 | <b>Sarah H Serling</b> . ICD-10-CM Coding and the Medical Home: A Focus on Medical Necessity..<br><i>Case in Point</i> . 2013/07//2013 Jul. 11:21                                                                                                                                                                                                                                                    | Level 1, Form<br>Title/abstract<br>screen |
| 3563 | <b>Knudsen HK,Abraham AJ,Johnson JA,Roman PM, Hannah K Knudsen, Amanda J Abraham, J Aaron Johnson, Paul M Roman</b> . Buprenorphine adoption in the National Drug Abuse Treatment Clinical Trials Network..<br><i>Journal of Substance Abuse Treatment</i> . 2009/10//. 37:307                                                                                                                       | Level 1, Form<br>Title/abstract<br>screen |
| 3564 | <b>Ritchie G,Weldon S,Macpherson G,Laithwaite H</b> . Evaluation of a drug and alcohol relapse prevention programme in a special hospital: an interpretative phenomenological analysis..<br><i>British Journal of Forensic Practice</i> . 2010/08//. 12:17                                                                                                                                           | Level 1, Form<br>Title/abstract<br>screen |
| 3566 | <b>Adam J. Gordon, Lauren M. Broyles</b> . A Physician-Centered Approach to Addiction Identification and Treatment Misses the Opportunity for Interdisciplinary Solutions..<br><i>Substance Abuse</i> . 2014/04//Apr-Jun2014. 35:108                                                                                                                                                                 | Level 1, Form<br>Title/abstract<br>screen |
| 3569 | <b>Shelly R Noe</b> . Office-based buprenorphine treatment: Identifying factors that promote retention in opioid dependent patients..<br><i>Office-based Buprenorphine Treatment: Identifying Factors That Promote Retention in Opioid Dependent Patients</i> . 2012/01//. #volume#:41 p                                                                                                             | Level 1, Form<br>Title/abstract<br>screen |
| 3571 | <b>Bush NJ,Wickham R</b> . Knowledge central..<br><i>Oncology Nursing Forum</i> . 2010/03//. 37:225                                                                                                                                                                                                                                                                                                  | Level 1, Form<br>Title/abstract<br>screen |
| 3572 | <b>D'Arcy Y</b> . Pain solutions. Managing chronic pain in acute care..<br><i>Nurse Practitioner</i> . 2010/12//. 35:14                                                                                                                                                                                                                                                                              | Level 1, Form<br>Title/abstract<br>screen |
| 3573 | <b>Husted J</b> . Exploring substance use's role in dementia: an abuse history could inform care for some elderly patients..<br><i>Addiction Professional</i> . 2006/09//2006 Sep-Oct. 4:43                                                                                                                                                                                                          | Level 1, Form<br>Title/abstract<br>screen |
| 3577 | <b>Kihlström A,Wikström E</b> . Towards network and citizen: Collaborative care for drug abusers..<br><i>International Journal of Health Planning &amp; Management</i> . 2009/07//. 24:233                                                                                                                                                                                                           | Level 1, Form<br>Title/abstract<br>screen |
| 3578 | <b>Garrard J,Choudary V,Groom H,Dieperink E,Willenbring ML,Durfee JM,Ho SB</b> . Organizational change in management of hepatitis C: evaluation of a CME program..<br><i>Journal of Continuing Education in the Health Professions</i> .                                                                                                                                                             | Level 1, Form<br>Title/abstract<br>screen |

|      |                                                                                                                                                                                                                                                                                                                                                                  |                                           |
|------|------------------------------------------------------------------------------------------------------------------------------------------------------------------------------------------------------------------------------------------------------------------------------------------------------------------------------------------------------------------|-------------------------------------------|
|      | 2006///Spring2006. 26:145                                                                                                                                                                                                                                                                                                                                        |                                           |
| 3579 | <b>Thomas BS.</b> Postoperative pain management in a patient with a history of drug addiction.. <i>Pennsylvania Nurse</i> . 2009/06//. 64:14                                                                                                                                                                                                                     | Level 1, Form<br>Title/abstract<br>screen |
| 3580 | <b>Champney-Smith J,Angove R,Barrowcliff A,Sampson C,Jones C,Hughes S.</b> A therapeutic day programme for problem substance users in Cardiff and the Vale of Glamorgan: development and client-centred evaluation.. <i>Journal of Substance Use</i> . 2001/01/02/. 6:40                                                                                         | Level 1, Form<br>Title/abstract<br>screen |
| 3581 | <b>Power AK,Chawla N.</b> Transformations in collaborative healthcare.. <i>Families, Systems &amp; Health: The Journal of Collaborative Family HealthCare</i> . 2008/12//. 26:459                                                                                                                                                                                | Level 1, Form<br>Title/abstract<br>screen |
| 3583 | <b>Weiss RD,Griffin ML,Gallop R,Onken LS,Gastfriend DR,Daley D,Crits-Christoph P,Bishop S,Barber JP, R D Weiss, M L Griffin, R Gallop, L S Onken, D R Gastfriend, D Daley, P Crits-Christoph, S Bishop, J P Barber.</b> Self-help group attendance and participation among cocaine dependent patients.. <i>Drug &amp; Alcohol Dependence</i> . 2000/08//. 60:169 | Level 1, Form<br>Title/abstract<br>screen |
| 3584 | <b>Bremner J,Edmonds N.</b> Supporting people with mental health problems to quit smoking.. <i>A Life in the Day</i> . 2007/08//. 11:15                                                                                                                                                                                                                          | Level 1, Form<br>Title/abstract<br>screen |
| 3587 | <b>Hunter TN.</b> Child welfare and alcohol and other drug treatment (AOD): bridging the gap to comprehensive services.. <i>Journal of Family Social Work</i> . 2003/12//. 7:63                                                                                                                                                                                  | Level 1, Form<br>Title/abstract<br>screen |
| 3588 | <b>Bering S.</b> Facing the commissioning challenge: responding effectively to people whose behaviour is challenging.. <i>Advances in Mental Health &amp; Intellectual Disabilities</i> . 2010/06//. 4:4                                                                                                                                                         | Level 1, Form<br>Title/abstract<br>screen |
| 3589 | <b>Lee M,George S.</b> Drug Strategy Unit.. <i>British Journal of Forensic Practice</i> . 2005/11//. 7:39                                                                                                                                                                                                                                                        | Level 1, Form<br>Title/abstract<br>screen |
| 3590 | <b>van der Meer IM,Ruggenti P,Remuzzi G.</b> The diabetic CKD patient-a major cardiovascular challenge.. <i>Journal of Renal Care</i> . 2010/05/02/May2010 Supplement 1. 36:34                                                                                                                                                                                   | Level 1, Form<br>Title/abstract<br>screen |
| 3594 | <b>Rubin IL,Fahs JJ,Beasley JB.</b> Delivery of health care for people with 'dual diagnosis': from the person to the policy.. <i>Mental Health Aspects of Developmental Disabilities</i> . 2007/07//Jul-Sep2007. 10:107                                                                                                                                          | Level 1, Form<br>Title/abstract<br>screen |
| 3595 | <b>Diehl-Svrjcek BC,Richardson R.</b> Decreasing NICU costs in the managed care arena: the positive impact of collaborative high-risk OB and NICU disease management programs.. <i>Lippincott's Case Management</i> . 2005/05//. 10:159                                                                                                                          | Level 1, Form<br>Title/abstract<br>screen |
| 3598 | <b>Dallas Bastian.</b> Bespoke care essential.. <i>Nursing Review (1326-0472)</i> . 2014/09//. #volume#:26                                                                                                                                                                                                                                                       | Level 1, Form<br>Title/abstract<br>screen |
| 3599 | <b>Killian Welch.</b> Bottled Up.. <i>Alcohol &amp; Alcoholism</i> . 2011/03//Mar/Apr2011. 46:217                                                                                                                                                                                                                                                                | Level 1, Form<br>Title/abstract<br>screen |
| 3600 | <b>Fidelindo A. Lim, Donald V. Brown Jr.,Sung Min Justin Kim.</b> Addressing Health Care Disparities in the Lesbian, Gay, Bisexual, and Transgender Population: A Review of Best Practices.. <i>AJN American Journal of Nursing</i> . 2014/06//. 114:24                                                                                                          | Level 1, Form<br>Title/abstract<br>screen |
| 3605 | <b>Swain E,Boulter S,Piek N.</b> Overcoming the challenges of evaluating dual diagnosis interventions in medium secure units.. <i>British Journal of Forensic</i>                                                                                                                                                                                                | Level 1, Form<br>Title/abstract           |

|      |                                                                                                                                                                                                                                                                                                                                                                                                                                                   |                                           |
|------|---------------------------------------------------------------------------------------------------------------------------------------------------------------------------------------------------------------------------------------------------------------------------------------------------------------------------------------------------------------------------------------------------------------------------------------------------|-------------------------------------------|
|      | <i>Practice</i> . 2010/02//. 12:33                                                                                                                                                                                                                                                                                                                                                                                                                | screen                                    |
| 3606 | <b>Menihan CA</b> . Limited sonography in collaborative midwifery practice.. <i>Journal of Midwifery &amp; Women's Health</i> . 2000/11//2000 Nov-Dec. 45:508                                                                                                                                                                                                                                                                                     | Level 1, Form<br>Title/abstract<br>screen |
| 3609 | <b>Bartels SJ,Coakley EH,Zubritsky C,Ware JH,Miles KM,Areán PA,Chen H,Oslin DW,Llorente MD,Costantino G,Quijano L,McIntyre JS,Linkins KW,Oxman TE,Maxwell J,Levkoff SE</b> . Improving access to geriatric mental health services: a randomized trial comparing treatment engagement with integrated versus enhanced referral care for depression, anxiety, and at-risk alcohol use.. <i>American Journal of Psychiatry</i> . 2004/08//. 161:1455 | Level 1, Form<br>Title/abstract<br>screen |
| 3610 | <b>Thompson HS,Mitchell EA</b> . Exploring interventions in secondary stroke prevention: a case study.. <i>British Journal of Neuroscience Nursing</i> . 2006/02//2006 Feb-Mar. 2:28                                                                                                                                                                                                                                                              | Level 1, Form<br>Title/abstract<br>screen |
| 3611 | <b>Schmidt MJ,Dostal KU</b> . Optimizing outcomes when patients leave against medical advice.. <i>Journal of Clinical Outcomes Management</i> . 2007/12//2007 Dec. 14:645                                                                                                                                                                                                                                                                         | Level 1, Form<br>Title/abstract<br>screen |
| 3614 | <b>Stoeckle-Roberts S,Reeves MJ,Jacobs BS,Maddox K,Choate L,Wehner S,Mullard AJ</b> . Performance improvement. Closing gaps between evidence-based stroke care guidelines and practices with a collaborative quality improvement project.. <i>Joint Commission Journal on Quality &amp; Patient Safety</i> . 2006/09//2006 Sep. 32:517                                                                                                            | Level 1, Form<br>Title/abstract<br>screen |
| 3618 | <b>Odeberg H,Rodriguez-Silva B,Salander P,Mårtensson B</b> . Individualized continuation electroconvulsive therapy and medication as a bridge to relapse prevention after an index course of electroconvulsive therapy in severe mood disorders: a naturalistic 3-year cohort study.. <i>Journal of ECT</i> . 2008/09//2008 Sep. 24:183                                                                                                           | Level 1, Form<br>Title/abstract<br>screen |
| 3620 | <b>Koelewijn-van Loon MS,van der Weijden T,Ronda G,van Steenkiste B,Winkens B,Elwyn G,Grol R</b> . Improving lifestyle and risk perception through patient involvement in nurse-led cardiovascular risk management: a cluster-randomized controlled trial in primary care.. <i>Preventive Medicine</i> . 2010/01//. 50:35                                                                                                                         | Level 1, Form<br>Title/abstract<br>screen |
| 3621 | <b>Gibson LE,Ruzek JI,Naturale AJ,Watson PJ,Bryant RA,Rynearson T,Young BH,Hamblen JL</b> . Interventions for individuals after mass violence and disaster: recommendations from the roundtable on screening and assessment, outreach, and intervention for mental health and substance abuse needs following disasters and mass violence.. <i>Journal of Trauma Practice</i> . 2006/10//. 5:1                                                    | Level 1, Form<br>Title/abstract<br>screen |
| 3624 | . Washington merges divisions and revamps for person-centered care.. <i>Alcoholism &amp; Drug Abuse Weekly</i> . 2009/09/14/. 21:1                                                                                                                                                                                                                                                                                                                | Level 1, Form<br>Title/abstract<br>screen |
| 3625 | . Oregon transformed health system to include key mental health support.. <i>Mental Health Weekly</i> . 2012/03/12/. 22:1                                                                                                                                                                                                                                                                                                                         | Level 1, Form<br>Title/abstract<br>screen |
| 3627 | <b>Baldwin JA,Johnson JL,Benally CC</b> . Building partnerships between indigenous communities and universities: lessons learned in HIV/AIDS and substance abuse prevention research.. <i>American Journal of Public Health</i> . 2009/03/02/Mar2009 Supplement. 99:S77                                                                                                                                                                           | Level 1, Form<br>Title/abstract<br>screen |
| 3628 | <b>Connors K,Connors Kelley,Bernstein H</b> . Innovative online smoking prevention education for pediatric providers, 'tween' girls, and their families.. <i>Journal of Communication in Healthcare</i> . 2010/04//. 3:9                                                                                                                                                                                                                          | Level 1, Form<br>Title/abstract<br>screen |

|      |                                                                                                                                                                                                                                                                                                      |                                           |
|------|------------------------------------------------------------------------------------------------------------------------------------------------------------------------------------------------------------------------------------------------------------------------------------------------------|-------------------------------------------|
| 3629 | <b>Daniels AS,Adams N,Carroll C,Beinecke RH.</b> A conceptual model for behavioral health and primary care integration: emerging challenges and strategies for improving international mental health services.. <i>International Journal of Mental Health</i> . 2009///Spring2009. 38:100            | Level 1, Form<br>Title/abstract<br>screen |
| 3630 | <b>Wilson A,Sinfield P,Rodgers S,Hammersley V,Coleman T.</b> Drugs to support smoking cessation in UK general practice: are evidence based guidelines being followed?. <i>Quality &amp; Safety in Health Care</i> . 2006/08//. #volume#:284                                                          | Level 1, Form<br>Title/abstract<br>screen |
| 3631 | <b>Catherine Vanderwater, Julia Culhane.</b> Successes and Challenges: One Cancer Centre's Experience Implementing a Smoking Cessation Model of Care into Daily Practice.. <i>Journal of Medical Imaging &amp; Radiation Sciences</i> . 2014/06//. 45:165                                            | Level 1, Form<br>Title/abstract<br>screen |
| 3632 | <b>Kayla Joy Thompson.</b> Implementation of the alcohol use disorders identification test to improve practice in a rural primary care clinic.. <i>Implementation of the Alcohol Use Disorders Identification Test to Improve Practice in a Rural Primary Care Clinic</i> . 2014/01//. #volume#:88 p | Level 1, Form<br>Title/abstract<br>screen |
| 3636 | <b>Quinlivan JA,Evans SF.</b> Impact of domestic violence and drug abuse in pregnancy on maternal attachment and infant temperament in teenage mothers in the setting of best clinical practice.. <i>Archives of Women's Mental Health</i> . 2005/09//. 8:191                                        | Level 1, Form<br>Title/abstract<br>screen |
| 3637 | <b>Kleinpeter C,Deschenes EP,Blanks J,Lepage CR,Knox M.</b> Providing recovery services for offenders with co-occurring disorders.. <i>Journal of Dual Diagnosis</i> . 2006/12//. 3:59                                                                                                               | Level 1, Form<br>Title/abstract<br>screen |
| 3638 | <b>Liz Ledger.</b> COPD.. <i>Nursing Standard</i> . 2015/04//4/1/2015. 29:61                                                                                                                                                                                                                         | Level 1, Form<br>Title/abstract<br>screen |
| 3640 | <b>Siegal HA,Cole PA,Li L,Eddy MF.</b> Can a brief clinical practicum influence physicians' communications with patients about alcohol and drug problems? Results of a long-term follow-up.. <i>Teaching &amp; Learning in Medicine</i> . 2000///Spring2000. 12:72                                   | Level 1, Form<br>Title/abstract<br>screen |
| 3641 | <b>Cynthia R. Harr, Gaynor I. Yancey.</b> Social Work Collaboration with Faith Leaders and Faith Groups Serving Families in Rural Areas.. <i>Journal of Religion &amp; Spirituality in Social Work</i> . 2014/04//Apr-Jun2014. 33:148                                                                | Level 1, Form<br>Title/abstract<br>screen |
| 3642 | <b>Slawson D,Shaughnessy AF,Saririan S,Ebell M,Barry H,Ali U.</b> POEMs.. <i>American Family Physician</i> . 2006/09//9/1/2006. 74:823                                                                                                                                                               | Level 1, Form<br>Title/abstract<br>screen |
| 3644 | <b>Boughey L.</b> Alcohol related brain damage: step by step support leads back to a rewarding life.. <i>Journal of Dementia Care</i> . 2005/07//2005 Jul-Aug. 13:22                                                                                                                                 | Level 1, Form<br>Title/abstract<br>screen |
| 3645 | <b>Gunn J,Hegarty K,Nagle C,Forster D,Brown S,Lumley J.</b> Putting woman-centered care into practice: a new (ANEW) approach to psychosocial risk assessment during pregnancy.. <i>Birth: Issues in Perinatal Care</i> . 2006/03//. 33:46                                                            | Level 1, Form<br>Title/abstract<br>screen |
| 3646 | . New & trends.. <i>Nurse.com Nursing Spectrum (New York/New Jersey Metro)</i> . 2011/09/12/2011 Sep 12. 23:42                                                                                                                                                                                       | Level 1, Form<br>Title/abstract<br>screen |
| 3647 | . News & trends.. <i>Nurse.com NurseWeek (West)</i> . 2011/09/12/2011 Sep 12. 24:38                                                                                                                                                                                                                  | Level 1, Form<br>Title/abstract<br>screen |
| 3648 | <b>Cristofalo M,Boutain D,Schraufnagel TJ,Bumgardner K,Zatzick D,Roy-Byrne PP, Meg Cristofalo, Doris Boutain, Trevor J Schraufnagel, Kristin</b>                                                                                                                                                     | Level 1, Form<br>Title/abstract           |

|      |                                                                                                                                                                                                                                                                                                                    |                                     |
|------|--------------------------------------------------------------------------------------------------------------------------------------------------------------------------------------------------------------------------------------------------------------------------------------------------------------------|-------------------------------------|
|      | <b>Bumgardner, Doug Zatzick, Peter P Roy-Byrne.</b> Unmet need for mental health and addictions care in urban community health clinics: frontline provider accounts.. <i>Psychiatric Services</i> . 2009/04//. 60:505                                                                                              | screen                              |
| 3649 | <b>Sean M . Getty.</b> Implementing a Mental Health Program Using the Recovery Model.. <i>OT Practice</i> . 2015/02/23/. 20:CE                                                                                                                                                                                     | Level 1, Form Title/abstract screen |
| 3651 | <b>Rohrer JE,Merry SP,Lopez-Jimenez F,Adamson SC,Wilshusen L.</b> A patient-centered decision rule for referral of patients to weight-loss programs.. <i>Quality Management in Health Care</i> . 2007/07//Jul-Sep2007. 16:250                                                                                      | Level 1, Form Title/abstract screen |
| 3652 | <b>Spangler JG,George G,Foley KL,Crandall SJ, John G Spangler, Geeta George, Kristie Long Foley, Sonia J Crandall.</b> Tobacco intervention training: current efforts and gaps in US medical schools.. <i>JAMA: Journal of the American Medical Association</i> . 2002/09/04/. 288:1102                            | Level 1, Form Title/abstract screen |
| 3654 | <b>Mena MP,Mitrani VB,Muir JA,Santisteban DA.</b> Collaborative practice. Extended parent-child separations: impact on substance-abusing Hispanic adolescents.. <i>Journal for Specialists in Pediatric Nursing</i> . 2008/01//. 13:50                                                                             | Level 1, Form Title/abstract screen |
| 3656 | <b>Van Hasselt VB,Killam G,Schlessinger KM,DiCicco TM,Anzalone WF Jr.,Leslie TL,George JA,Werder EJ,Massey LL.</b> The Adolescent Drug Abuse Prevention and Treatment (ADAPT) program: a mental health-law enforcement collaboration.. <i>Journal of Child &amp; Adolescent Substance Abuse</i> . 2005/12//. 15:87 | Level 1, Form Title/abstract screen |
| 3661 | <b>Graham J.</b> Motivational interviewing: a hammer looking for a nail?. <i>Journal of Psychiatric &amp; Mental Health Nursing</i> . 2004/08//. 11:494                                                                                                                                                            | Level 1, Form Title/abstract screen |
| 3663 | <b>van Wormer K.</b> Harm reduction: a model for social work practice with adolescents.. <i>Social Policy Journal</i> . 2004/04//. 3:19                                                                                                                                                                            | Level 1, Form Title/abstract screen |
| 3664 | <b>Tran NK,Kost GJ.</b> Guidelines for home testing in primary care: education, integration, information, limitations, and indications.. <i>Point of Care</i> . 2006/12//2006 Dec. 5:145                                                                                                                           | Level 1, Form Title/abstract screen |
| 3667 | <b>Green C.</b> Providing treatment and care for adolescent substance users.. <i>Journal of Substance Use</i> . 2000/03//. 4:227                                                                                                                                                                                   | Level 1, Form Title/abstract screen |
| 3671 | <b>Clemmens DA,Kerr AR.</b> Improving oral health in women: nurses' call to action.. <i>MCN: The American Journal of Maternal Child Nursing</i> . 2008/01//Jan/Feb2008. 33:10                                                                                                                                      | Level 1, Form Title/abstract screen |
| 3672 | <b>McCrystal P,McAleavy G.</b> Addressing health care in Northern Ireland through collaborative peer education.. <i>International Journal of Health Promotion &amp; Education</i> . 2000/08//. 38:76                                                                                                               | Level 1, Form Title/abstract screen |
| 3673 | <b>van de Mheen HD.</b> Demand-driven care: can it work in the addiction field?. <i>Journal of Substance Use</i> . 2003/06//. 8:119                                                                                                                                                                                | Level 1, Form Title/abstract screen |
| 3676 | <b>Wieder BL,Lutz WJ,Boyle P.</b> Adapting integrated dual disorders treatment for inpatient settings.. <i>Journal of Dual Diagnosis</i> . 2005/12//. 2:101                                                                                                                                                        | Level 1, Form Title/abstract screen |
| 3677 | <b>Rotgers F,Kishline A.</b> Moderation Management: a support group for persons who want to reduce their drinking, but not not necessarily abstain.. <i>International Journal of Self Help &amp; Self Care</i> . 1999/04//1999-2000. 1:145                                                                         | Level 1, Form Title/abstract screen |



|      |                                                                                                                                                                                                                                                                                                                                                                                                                                                |                                           |
|------|------------------------------------------------------------------------------------------------------------------------------------------------------------------------------------------------------------------------------------------------------------------------------------------------------------------------------------------------------------------------------------------------------------------------------------------------|-------------------------------------------|
| 3680 | <b>Wutzke SE,Conigrave KM,Saunders JB,Hall WD.</b> The long-term effectiveness of brief interventions for unsafe alcohol consumption: a 10-year follow-up.. <i>Addiction</i> . 2002/06//. 97:665                                                                                                                                                                                                                                               | Level 1, Form<br>Title/abstract<br>screen |
| 3681 | <b>Heit HA,Gourlay DL.</b> Urine drug testing in pain medicine.. <i>Journal of Pain &amp; Symptom Management</i> . 2004/03//. 27:260                                                                                                                                                                                                                                                                                                           | Level 1, Form<br>Title/abstract<br>screen |
| 3683 | <b>Greenblatt J,Koman S.</b> Treat eating disorders concurrently: treatment will require intensive monitoring at the outset.. <i>Addiction Professional</i> . 2006/07//2006 Jul-Aug. 4:43                                                                                                                                                                                                                                                      | Level 1, Form<br>Title/abstract<br>screen |
| 3684 | <b>Spencer MS,Muroff JR,Delva J.</b> Conditional welfare: a family social work perspective on mandatory drug testing...co-published simultaneously in <i>Journal of Family Social Work</i> (The Haworth Press, Inc) Vol. 4, No. 4, 2000, pp. 3-14; and: <i>Substance Abuse Issues Among Families in Diverse Populations</i> (ed: Jorge Delva) The Haworth Press, Inc., 2000, pp. 3-14. <i>Journal of Family Social Work</i> . 2000/09/21/. 4:3 | Level 1, Form<br>Title/abstract<br>screen |
| 3685 | <b>Hannah Rachel Capon.</b> Therapist discourse in manualised therapy for alcohol addictions.. <i>Therapist discourse in manualised therapy for alcohol addictions</i> . 2014/01//. #volume#:N.PAG p                                                                                                                                                                                                                                           | Level 1, Form<br>Title/abstract<br>screen |
| 3686 | <b>Wulfensmith C.</b> Understanding the introverted client.. <i>Addiction Professional</i> . 2009/03//Mar/Apr2009. 7:3p                                                                                                                                                                                                                                                                                                                        | Level 1, Form<br>Title/abstract<br>screen |
| 3687 | <b>D'Ambrosio R,Laws KE,Gabriel RM,Hromco J,Kelly P.</b> Implementing Motivational Interviewing in a Non-MI world: a MI Knowledge Adoption Study.. <i>Journal of Teaching in the Addictions</i> . 2006/10//. 5:21                                                                                                                                                                                                                              | Level 1, Form<br>Title/abstract<br>screen |
| 3689 | <b>Penson RT,Fergus LA,Haston RJ,Clark JR,Demoteses A,O'Connell JJ,Chabner BA,Lynch TJ Jr.</b> Schwartz Center rounds. The Kenneth B. Schwartz Center at Massachusetts General Hospital Hematology-Oncology Department: hope for the homeless.. <i>Oncologist</i> . 2003/09//. 8:488                                                                                                                                                           | Level 1, Form<br>Title/abstract<br>screen |
| 3690 | <b>Phillips S,Haycock C,Boyle D.</b> Development of an alcohol withdrawal protocol: CNS collaborative exemplar.. <i>Clinical Nurse Specialist: The Journal for Advanced Nursing Practice</i> . 2006/07//. 20:190                                                                                                                                                                                                                               | Level 1, Form<br>Title/abstract<br>screen |
| 3694 | <b>Ursula E Bauer, Peter A Briss, Richard A Goodman, Barbara A Bowman.</b> Prevention of chronic disease in the 21st century: elimination of the leading preventable causes of premature death and disability in the USA.. <i>Lancet</i> . 2014/07/05/. 384 North American Edition:45                                                                                                                                                          | Level 1, Form<br>Title/abstract<br>screen |
| 3700 | <b>M Abdel-Mawgoud, M K al-Haddad.</b> Heroin addiction in Bahrain: 15 years experience.. <i>Addiction</i> . 1996/12//. 91:1859                                                                                                                                                                                                                                                                                                                | Level 1, Form<br>Title/abstract<br>screen |
| 3704 | <b>Ahijevych K,Boyle KK,Burger K.</b> Microcomputers enhance student health fairs.. <i>Journal of Nursing Education</i> . 1985/01//. 24:16                                                                                                                                                                                                                                                                                                     | Level 1, Form<br>Title/abstract<br>screen |
| 3705 | <b>Busen NH,Beech B.</b> A collaborative model for community-based health care screening of homeless adolescents.. <i>Journal of Professional Nursing</i> . 1997/09//1997 Sep-Oct. 13:316                                                                                                                                                                                                                                                      | Level 1, Form<br>Title/abstract<br>screen |
| 3706 | <b>Boyle AH,Locke DL.</b> Update on chronic obstructive pulmonary disease.. <i>MEDSURG Nursing</i> . 2004/02//. 13:42                                                                                                                                                                                                                                                                                                                          | Level 1, Form<br>Title/abstract<br>screen |
| 3707 | <b>Pauline E. Hill.</b> Perinatal Addiction: Providing Compassionate and Competent Care.. <i>Clinical Obstetrics &amp; Gynecology</i> . 2013/03//. 56:178                                                                                                                                                                                                                                                                                      | Level 2, Form<br>Full Text                |

|      |                                                                                                                                                                                                                                                                                     | Screening                                 |
|------|-------------------------------------------------------------------------------------------------------------------------------------------------------------------------------------------------------------------------------------------------------------------------------------|-------------------------------------------|
| 3708 | <b>Jessica W Blanchard, J T Petherick, Heather Basara.</b> Stakeholder engagement: a model for tobacco policy planning in Oklahoma Tribal communities.. <i>American Journal of Preventive Medicine</i> . 2015/01/02/Jan2015 Supplement 1. 48:S44                                    | Level 1, Form<br>Title/abstract<br>screen |
| 3709 | <b>Alexander P.</b> An investigation of inpatient referrals to a clinical psychologist in a hospice.. <i>European Journal of Cancer Care</i> . 2004/03//. 13:36                                                                                                                     | Level 1, Form<br>Title/abstract<br>screen |
| 3710 | <b>Hackbarth DP,Schnopp-Wyatt D,Katz D,Williams J,Silvestri B,Pfleger M.</b> Collaborative research and action to control the geographic placement of outdoor advertising of alcohol and tobacco products in Chicago.. <i>Public Health Reports</i> . 2001/11//Nov/Dec2001. 116:558 | Level 1, Form<br>Title/abstract<br>screen |
| 3711 | <b>Baldwin JA,Rolf JE,Johnson J,Bowers J,Benally C,Trotter RT II.</b> Developing culturally sensitive HIV/AIDS and substance abuse prevention curricula for Native American youth.. <i>Journal of School Health</i> . 1996/11//. 66:322                                             | Level 1, Form<br>Title/abstract<br>screen |
| 3712 | <b>Arborelius E,Nyberg K.</b> How should midwives discuss smoking behaviour in pregnancy with women of low educational attainment?. <i>Midwifery</i> . 1997/12//1997 Dec. 13:210                                                                                                    | Level 1, Form<br>Title/abstract<br>screen |
| 3713 | <b>Smith GR Jr.,Manderscheid RW,Flynn LM,Steinwachs DM.</b> Principles for assessment of patient outcomes in mental health care.. <i>Psychiatric Services</i> . 1997/08//. 48:1033                                                                                                  | Level 1, Form<br>Title/abstract<br>screen |
| 3715 | . Waiting lists for SUD treatment at the VA nothing new.. <i>Alcoholism &amp; Drug Abuse Weekly</i> . 2014/06/09/. 26:4                                                                                                                                                             | Level 1, Form<br>Title/abstract<br>screen |
| 3717 | <b>Workman E,Hendrix J.</b> Anxiety and depression in a psychiatrically informed pain medicine practice.. <i>Psychiatric Times</i> . 2007/12//. 24:62                                                                                                                               | Level 1, Form<br>Title/abstract<br>screen |
| 3718 | <b>Jumnoodoo R,Marlatt A,Coyne P,Matt E,Singaram E,Lambert L.</b> Development of a 'whole system' approach to relapse prevention (RP) in Brent Mental Health Services.. <i>N2N: Nurse2Nurse</i> . 2002/05//2002 May. 2:46                                                           | Level 1, Form<br>Title/abstract<br>screen |
| 3722 | <b>Ka'ano'i ME,Braun KL,Gotay CC.</b> Primary care physicians' knowledge, attitudes and practices related to cancer screening and cancer prevention clinical trials.. <i>Pacific Health Dialog</i> . 2004/09//2004 Sep. 11:160                                                      | Level 1, Form<br>Title/abstract<br>screen |
| 3723 | <b>Pringle-Nelson C,Perry GP.</b> The ferris wheel: understanding FASD: compassion, flexibility are important elements in treating young clients affected by prenatal alcohol exposure.. <i>Addiction Professional</i> . 2006/11//2006 Nov. 4:24                                    | Level 1, Form<br>Title/abstract<br>screen |
| 3724 | <b>Alphonso CD.</b> Reflection on a critical incident.. <i>Contemporary Nurse: A Journal for the Australian Nursing Profession</i> . 2007/02//. 24:89                                                                                                                               | Level 1, Form<br>Title/abstract<br>screen |
| 3726 | <b>P J Raue, G S Alexopoulos, M L Bruce, S Klimstra, B H Mulsant, J J Gallo.</b> The systematic assessment of depressed elderly primary care patients.. <i>International Journal of Geriatric Psychiatry</i> . 2001/06//. 16:560                                                    | Level 1, Form<br>Title/abstract<br>screen |
| 3727 | <b>Amy Dawel, Kaarin J Anstey.</b> Interventions for Midlife Smoking Cessation: A Literature Review.. <i>Australian Psychologist</i> . 2011/09//. 46:190                                                                                                                            | Level 1, Form<br>Title/abstract<br>screen |
| 3728 | . Tailored, individualized treatment plus naltrexone effective for alcohol-dependent patients.. <i>DATA: The Brown University Digest of Addiction Theory &amp;</i>                                                                                                                  | Level 1, Form<br>Title/abstract           |

|      |                                                                                                                                                                                                                                                                                                 |                                           |
|------|-------------------------------------------------------------------------------------------------------------------------------------------------------------------------------------------------------------------------------------------------------------------------------------------------|-------------------------------------------|
|      | <i>Application</i> . 2007/10//. 26:1                                                                                                                                                                                                                                                            | screen                                    |
| 3729 | <b>Elizabeth Murray</b> . Screening and brief intervention for alcohol use disorders in primary care.. <i>BMJ: British Medical Journal</i> . 2013/01/26/. 346:8                                                                                                                                 | Level 1, Form<br>Title/abstract<br>screen |
| 3730 | <b>Judy Cain</b> . Abuse and addiction in females: program offered with Brandywine Counseling Center.. <i>DNA Reporter</i> . 2013/08//2013 Aug-Oct. 38:5                                                                                                                                        | Level 1, Form<br>Title/abstract<br>screen |
| 3732 | <b>Rosenfeld SL,Keenan PM,Fox DJ,Chase LH,Melchiono MW,Woods ER</b> . Youth perceptions of comprehensive adolescent health services through the Boston HAPPENS program.. <i>Journal of Pediatric Healthcare</i> . 2000/03//2000 Mar-Apr. 14:60                                                  | Level 1, Form<br>Title/abstract<br>screen |
| 3733 | <b>J B Saunders, O G Aasland, A Amundsen, M Grant</b> . Alcohol consumption and related problems among primary health care patients: WHO collaborative project on early detection of persons with harmful alcohol consumption--I.. <i>Addiction</i> . 1993/03//. 88:349                         | Level 1, Form<br>Title/abstract<br>screen |
| 3734 | . Directions for Future Patient-Centered and Comparative Effectiveness Research for People With Serious Mental Illness.. <i>Schizophrenia Bulletin</i> . 2014/01/02/. 40:i                                                                                                                      | Level 1, Form<br>Title/abstract<br>screen |
| 3736 | <b>Paris W,Thompson S,Rihner T,Quisenberry M,Cooper DKC</b> . A comparison of transplant patient and social worker attitudes in regard to transplant patient psychosocial selection criteria, role expectations, and communication style.. <i>Social Work in Health Care</i> . 1996/06//. 23:39 | Level 1, Form<br>Title/abstract<br>screen |
| 3737 | <b>Shpilko I</b> . Russian-American health care: bridging the communication gap between physicians and patients.. <i>Patient Education &amp; Counseling</i> . 2006/12//. 64:331                                                                                                                 | Level 1, Form<br>Title/abstract<br>screen |
| 3738 | <b>Bryant-Jefferies R</b> . Becoming an alcohol counsellor.. <i>CPJ: Counselling &amp; Psychotherapy Journal</i> . 2001/08//2001 Aug. 12:18                                                                                                                                                     | Level 1, Form<br>Title/abstract<br>screen |
| 3742 | <b>Reiskin H,Lindenberg CS</b> . Involving the target population and their providers in evaluation of substance abuse videos.. <i>NursingConnections</i> . 1992///1992 Winter. 5:47                                                                                                             | Level 1, Form<br>Title/abstract<br>screen |
| 3743 | <b>Caudle P</b> . Providing culturally sensitive health care to Hispanic clients.. <i>Nurse Practitioner</i> . 1993/12//1993 Dec. 18:40                                                                                                                                                         | Level 1, Form<br>Title/abstract<br>screen |
| 3744 | <b>Wiest JV</b> . The hospice advantage.. <i>American Journal of Hospice &amp; Palliative Care</i> . 1992/11//1992 Nov-Dec. 9:13                                                                                                                                                                | Level 1, Form<br>Title/abstract<br>screen |
| 3745 | <b>Fernandez J,Rooney G,Leahy M,Alcock J,Baski N</b> . Shared care: a working relationship?. <i>N2N: Nurse2Nurse</i> . 2004/08//2004 Aug. 4:43                                                                                                                                                  | Level 1, Form<br>Title/abstract<br>screen |
| 3746 | <b>Ford T</b> . Effective strategies for working with dually diagnosed clients: clinicians need creative approaches to assessment, treatment.. <i>Addiction Professional</i> . 2003/05//2003 May. 1:21                                                                                          | Level 1, Form<br>Title/abstract<br>screen |
| 3747 | <b>J F A Murphy</b> . Practicing medicine thirty years on.. <i>Irish Medical Journal</i> . 2014/05//2014 May. 107:132                                                                                                                                                                           | Level 1, Form<br>Title/abstract<br>screen |
| 3748 | <b>Lang MA,Davidson L,Bailey P,Levine MS</b> . Clinicians' and clients' perspectives on the impact of assertive community treatment.. <i>Psychiatric</i>                                                                                                                                        | Level 1, Form<br>Title/abstract           |

|      |                                                                                                                                                                                                                                                                                                                                                                                                                                                                                                                                                                         |                                     |
|------|-------------------------------------------------------------------------------------------------------------------------------------------------------------------------------------------------------------------------------------------------------------------------------------------------------------------------------------------------------------------------------------------------------------------------------------------------------------------------------------------------------------------------------------------------------------------------|-------------------------------------|
|      | <i>Services</i> . 1999/10//. 50:1331                                                                                                                                                                                                                                                                                                                                                                                                                                                                                                                                    | screen                              |
| 3749 | <b>Shaked G, Renert N, Mahuda I, Strous RD</b> . Psychiatric care in the Middle East: a 'mental health supermarket' in the town of Lod.. <i>Psychiatric Rehabilitation Journal</i> . 2004//Winter2004. 27:207                                                                                                                                                                                                                                                                                                                                                           | Level 1, Form Title/abstract screen |
| 3752 | <b>Sheppard R, Maloney S, Maye M, Ward J, Geoghegan N</b> . The best laid care plans.. <i>World of Irish Nursing &amp; Midwifery</i> . 2009/07//Jul/Aug2009. 17:42                                                                                                                                                                                                                                                                                                                                                                                                      | Level 2, Form Full Text Screening   |
| 3753 | <b>A Golay, E Brock, R Gabriel, T Konrad, N Lalic, M Laville, G Mingrone, J Petrie, T-M Phan, K H Pietiläinen, C-H Anderwald</b> . Taking small steps towards targets - perspectives for clinical practice in diabetes, cardiometabolic disorders and beyond.. <i>International Journal of Clinical Practice</i> . 2013/04//. 67:322                                                                                                                                                                                                                                    | Level 1, Form Title/abstract screen |
| 3754 | <b>Thomas SP, Shattell M, Martin T</b> . What's therapeutic about the therapeutic milieu?. <i>Archives of Psychiatric Nursing</i> . 2002/06//2002 Jun. 16:99                                                                                                                                                                                                                                                                                                                                                                                                            | Level 1, Form Title/abstract screen |
| 3757 | <b>Morrow M, Ngoc DH, Hoang TT, Trinh TH</b> . Smoking and young women in Vietnam: the influence of normative gender roles.. <i>Social Science &amp; Medicine</i> . 2002/08/15/. 55:681                                                                                                                                                                                                                                                                                                                                                                                 | Level 1, Form Title/abstract screen |
| 3758 | <b>McPhillips-Tangum C, Cahill A, Bocchino C, Cutler CM</b> . Addressing tobacco in managed care: results of the 2000 survey.. <i>American Journal of Managed Care</i> . 2002/06/26/2002 Jun 25 Preventive Medicine in Managed Care. 3:85                                                                                                                                                                                                                                                                                                                               | Level 1, Form Title/abstract screen |
| 3759 | <b>T van Elderen-van Kemenade, S Maes, Y van den Broek</b> . Effects of a health education programme with telephone follow-up during cardiac rehabilitation.. <i>British Journal of Clinical Psychology</i> . 1994/09//1994 Sep. 33 ( Pt 3):367                                                                                                                                                                                                                                                                                                                         | Level 1, Form Title/abstract screen |
| 3760 | <b>Woods ER, Samples CL, Melchiono MW, Harris SK</b> . Boston HAPPENS Program: HIV-positive, homeless, and at-risk youth can access care through youth-oriented HIV services.. <i>Seminars in Pediatric Infectious Diseases</i> . 2003/01//2003 Jan. 14:43                                                                                                                                                                                                                                                                                                              | Level 1, Form Title/abstract screen |
| 3761 | . Leading researcher tells R.I. audience to emphasize clients in system change.. <i>Alcoholism &amp; Drug Abuse Weekly</i> . 2009/01/26/. 21:1                                                                                                                                                                                                                                                                                                                                                                                                                          | Level 1, Form Title/abstract screen |
| 3762 | . Screening is not about the paperwork: Minkoff.. <i>Alcoholism &amp; Drug Abuse Weekly</i> . 2012/04/23/. 24:7                                                                                                                                                                                                                                                                                                                                                                                                                                                         | Level 1, Form Title/abstract screen |
| 3763 | <b>Veronica Hall</b> . Understanding the causes and symptoms of IBD.. <i>Nursing Times</i> . 2014/11/12/. 110:16                                                                                                                                                                                                                                                                                                                                                                                                                                                        | Level 1, Form Title/abstract screen |
| 3766 | <b>Whatling J</b> . Managing chronic obstructive disease.. <i>Nursing Standard</i> . 1995/11/15/1995 Nov 15-21. 10:34                                                                                                                                                                                                                                                                                                                                                                                                                                                   | Level 1, Form Title/abstract screen |
| 3767 | <b>Nancy Murphy</b> . Studying and facilitating the development, installation, and initial implementation of an interdisciplinary buprenorphine treatment/practice with a publicly funded, HIV primary care, designated AIDS center in New York City: A practice-focused.... <i>Studying &amp; Facilitating the Development, Installation &amp; Initial Implementation of an Interdisciplinary Buprenorphine Treatment/practice With a Publicly Funded, HIV Primary Care, Designated AIDS Center in New York City: A Practice-focused....</i> 2013/01//. #volume#:281 p | Level 1, Form Title/abstract screen |
| 3768 | <b>Carr VJ, Lewin TJ, Walton JM, Faehrmann C, Reid ALA</b> . Consultation-                                                                                                                                                                                                                                                                                                                                                                                                                                                                                              | Level 1, Form                       |

|      |                                                                                                                                                                                                                                                                                                                                                             |                                     |
|------|-------------------------------------------------------------------------------------------------------------------------------------------------------------------------------------------------------------------------------------------------------------------------------------------------------------------------------------------------------------|-------------------------------------|
|      | liaison psychiatry in general practice.. <i>Australian &amp; New Zealand Journal of Psychiatry</i> . 1997/02//1997 Feb. 31:85                                                                                                                                                                                                                               | Title/abstract screen               |
| 3769 | <b>Currier PA.</b> An Azorean-American nursing accord of cooperation and exchange: nurturing the process.. <i>Journal of Multicultural Nursing &amp; Health (JMCNH)</i> . 2001///2001 Summer. 7:23                                                                                                                                                          | Level 1, Form Title/abstract screen |
| 3770 | <b>Wright C.</b> Healing the invisible wound: self-help in addictions treatment.. <i>Journal of the American Academy of Physician Assistants</i> . 1990/06//1990 Jun. 3:261                                                                                                                                                                                 | Level 1, Form Title/abstract screen |
| 3773 | . A patient's perspective: Army Major Steve McCullough, retired, wounded warrior.. <i>Case in Point</i> . 2012/07//2012 Jul. 10:15                                                                                                                                                                                                                          | Level 1, Form Title/abstract screen |
| 3774 | <b>Arborelius E,Bremberg S, E Arborelius, S Bremberg.</b> Prevention in practice. How do general practitioners discuss life-style issues with their patients?. <i>Patient Education &amp; Counseling</i> . 1994/04//1994 Apr. 23:23                                                                                                                         | Level 1, Form Title/abstract screen |
| 3775 | <b>Tom McKeithen, Sheila Robertson, Mike Speight.</b> Developing clinical competencies to assess learning needs and outcomes: The experience of the CS2day initiative.. <i>Journal of Continuing Education in the Health Professions</i> . 2011/09/02/Fall2011 Supplement. 31:S21                                                                           | Level 1, Form Title/abstract screen |
| 3776 | <b>Corse SJ,Hirschinger NB,Caldwell S.</b> Brief reports. Conducting treatment outcome research in a community mental health center: a university-agency collaboration.. <i>Psychiatric Rehabilitation Journal</i> . 1996///Summer1996. 20:59                                                                                                               | Level 1, Form Title/abstract screen |
| 3780 | <b>Laura Zimmerman.</b> MEDiC's 'Health Talk' benefits underserved.. <i>Nursingmatters</i> . 2012/12//2012 Dec. 23:5                                                                                                                                                                                                                                        | Level 1, Form Title/abstract screen |
| 3783 | <b>Mary W. Ales, Shelly B. Rodrigues, Robyn Snyder, Mary Conklin.</b> Developing and implementing an effective framework for collaboration: The experience of the CS2day collaborative.. <i>Journal of Continuing Education in the Health Professions</i> . 2011/09/02/Fall2011 Supplement. 31:S13                                                          | Level 1, Form Title/abstract screen |
| 3784 | <b>Saitz R,Larson MJ,LaBelle C,Richardson J,Samet JH.</b> The case for chronic disease management for addiction.. <i>Journal of Addiction Medicine</i> . 2008/06//. 2:55                                                                                                                                                                                    | Level 2, Form Full Text Screening   |
| 3785 | <b>Cynthia D. Connelly.</b> Perinatal Mental Health Model: Design, Implementation, and Acceptability of a Community-Based Collaborative Care Intervention.. <i>JOGNN: Journal of Obstetric, Gynecologic &amp; Neonatal Nursing</i> . 2011/05/02/May2011 Supplement 1. 40:S100                                                                               | Level 1, Form Title/abstract screen |
| 3786 | <b>Peele S.</b> Endpage. How I found common cause with social workers.. <i>Journal of Social Work Practice in the Addictions</i> . 2004/09//. 4:117                                                                                                                                                                                                         | Level 1, Form Title/abstract screen |
| 3787 | <b>Parsons ML,Warner-Robbins C.</b> In our community. Holistic nursing on the front lines: a community program helps women's transition from jail to society.. <i>AJN American Journal of Nursing</i> . 2002/06//. 102:73                                                                                                                                   | Level 1, Form Title/abstract screen |
| 3790 | <b>Johns C.</b> To educate or what? Marking the holistic ground within the CCU.. <i>Nursing in Critical Care</i> . 2001/11//2001 Nov-Dec. 6:297                                                                                                                                                                                                             | Level 1, Form Title/abstract screen |
| 3792 | <b>Francis X Holt.</b> False-positive self-reporting at a Massachusetts Level III.7 detox: Intersection of individual level of need and systemic constraint of choice.. <i>False-positive Self-reporting at a Massachusetts Level Iii.7 Detox: Intersection of Individual Level of Need &amp; Systemic Constraint of Choice</i> . 2011/01//. #volume#:120 p | Level 1, Form Title/abstract screen |

|      |                                                                                                                                                                                                                                                                                                                                                                            |                                     |
|------|----------------------------------------------------------------------------------------------------------------------------------------------------------------------------------------------------------------------------------------------------------------------------------------------------------------------------------------------------------------------------|-------------------------------------|
| 3797 | <b>Eric Goplerud.</b> SBIRT coming to hospitals via Joint Commission...Screening, Brief Intervention, and Referral to Treatment. <i>Alcoholism &amp; Drug Abuse Weekly.</i> 2012/05/28/. 24:5                                                                                                                                                                              | Level 1, Form Title/abstract screen |
| 3798 | <b>Mulvihill DG.</b> Help-seeking for alcohol dependency by women with post-traumatic stress disorder and a history of intimate partner violence.. <i>Help-seeking for Alcohol Dependency by Women With Post-traumatic Stress Disorder &amp; a History of Intimate Partner Violence.</i> 2009/01//. #volume#:279 p                                                         | Level 1, Form Title/abstract screen |
| 3799 | . Spotlight.. <i>PARADIGM (Targeted Publications Group, Inc).</i> 2012///2012 Spring. 16:2                                                                                                                                                                                                                                                                                 | Level 1, Form Title/abstract screen |
| 3800 | . Therapeutic alliance may influence medical interventions for alcohol dependence.. <i>DATA: The Brown University Digest of Addiction Theory &amp; Application.</i> 2008/09//. 27:3                                                                                                                                                                                        | Level 1, Form Title/abstract screen |
| 3803 | <b>Lynn Owens, Graham Butcher, Ian Gilmore, Ruwanthi Kolamunnage-Dona, James Oyee, Liz Perkins, Tom Walley, Paula Williamson, Ken Wilson, Munir Pirmohamed.</b> A randomised controlled trial of extended brief intervention for alcohol dependent patients in an acute hospital setting (ADPAC).. <i>BMC Public Health.</i> 2011/01//. 11:528                             | Level 1, Form Title/abstract screen |
| 3804 | <b>Brink P.J.</b> Patientology one more time.. <i>Western Journal of Nursing Research.</i> 1991/02//. 13:9                                                                                                                                                                                                                                                                 | Level 1, Form Title/abstract screen |
| 3805 | <b>Adrian H Taylor, Emma S Everson-Hock, Michael Ussher.</b> Integrating the promotion of physical activity within a smoking cessation programme: findings from collaborative action research in UK Stop Smoking Services.. <i>BMC Health Services Research.</i> 2010/01//. 10:317                                                                                         | Level 1, Form Title/abstract screen |
| 3808 | <b>Staiger PK,Long C,Baker A.</b> Health service systems and comorbidity: stepping up to the mark.. <i>Mental Health &amp; Substance Use: Dual Diagnosis.</i> 2010/06//. 3:148                                                                                                                                                                                             | Level 1, Form Title/abstract screen |
| 3809 | <b>Mohatt DF.</b> Collaborative mental health care needed to help returning veterans.. <i>Rural Clinician Quarterly.</i> 2008///2008 Summer. #volume#:1                                                                                                                                                                                                                    | Level 1, Form Title/abstract screen |
| 3811 | <b>Elaine M Edelman.</b> Patients' perception of family involvement and its relationship to medication adherence for persons with schizophrenia and schizoaffective disorders.. <i>Patients' Perception of Family Involvement &amp; its Relationship to Medication Adherence for Persons With Schizophrenia &amp; Schizoaffective Disorders.</i> 2010/01//. #volume#:158 p | Level 1, Form Title/abstract screen |
| 3812 | <b>Kathleen Sciacca.</b> Integrating three interventions for dual-diagnosis patients.. <i>Alcoholism &amp; Drug Abuse Weekly.</i> 2012/02/06/. 24:5                                                                                                                                                                                                                        | Level 1, Form Title/abstract screen |
| 3813 | <b>Munro I,Edward K.</b> Mental illness and substance use: an Australian perspective.. <i>International Journal of Mental Health Nursing.</i> 2008/08//. 17:255                                                                                                                                                                                                            | Level 1, Form Title/abstract screen |
| 3814 | <b>Galanter M,Glickman L,Singer D.</b> An overview of outpatient treatment of adolescent substance abuse.. <i>Substance Abuse.</i> 2007/06//. 28:51                                                                                                                                                                                                                        | Level 1, Form Title/abstract screen |
| 3815 | <b>Lehman WE,Fletcher BW,Wexler HK,Melnick G.</b> Organizational factors and collaboration and integration activities in criminal justice and drug abuse treatment agencies.. <i>Drug &amp; Alcohol Dependence.</i> 2009/08/02/Aug2009 Supplement 1. 103:S65                                                                                                               | Level 1, Form Title/abstract screen |

|      |                                                                                                                                                                                                                                                                                                                                                                                          |                                           |
|------|------------------------------------------------------------------------------------------------------------------------------------------------------------------------------------------------------------------------------------------------------------------------------------------------------------------------------------------------------------------------------------------|-------------------------------------------|
| 3816 | <b>Jamie Crawley.</b> The experience of chronic pain as described by African American indigent adults attending an urban primary care clinic.. <i>Experience of Chronic Pain as Described by African American Indigent Adults Attending an Urban Primary Care Clinic.</i> 2010/01//. #volume#:306 p                                                                                      | Level 1, Form<br>Title/abstract<br>screen |
| 3817 | <b>Litt MD,Kadden RM.</b> Looking into the Black Box: a commentary on Individualized Assessment and Treatment Program (IATP) for alcohol dependence.. <i>DATA: The Brown University Digest of Addiction Theory &amp; Application.</i> 2010/03//. 29:8                                                                                                                                    | Level 1, Form<br>Title/abstract<br>screen |
| 3818 | <b>Taber M.</b> Adolescent treatment. Programs can adjust to wraparound model.. <i>Addiction Professional.</i> 2006/09//2006 Sep-Oct. 4:50                                                                                                                                                                                                                                               | Level 1, Form<br>Title/abstract<br>screen |
| 3820 | . Newsletter.. <i>American Family Physician.</i> 2007/07/15/. 76:179                                                                                                                                                                                                                                                                                                                     | Level 1, Form<br>Title/abstract<br>screen |
| 3821 | <b>DeSimone ME,Crowe A.</b> Nonpharmacological approaches in the management of hypertension.. <i>Journal of the American Academy of Nurse Practitioners.</i> 2009/04//. 21:189                                                                                                                                                                                                           | Level 1, Form<br>Title/abstract<br>screen |
| 3822 | <b>Eisele J.</b> Balancing body and mind in treatment: centers see biochemical repair as a needed element for success.. <i>Addiction Professional.</i> 2007/01//2007 Jan-Feb. 5:23                                                                                                                                                                                                       | Level 1, Form<br>Title/abstract<br>screen |
| 3824 | <b>McMillan I.</b> Tribal quest... US Indians... Indian Health Service (IHS). <i>Nursing Times.</i> 1995/01/18/1995 Jan 18-24 Prof Dev. 91:46                                                                                                                                                                                                                                            | Level 1, Form<br>Title/abstract<br>screen |
| 3826 | . AAFP news now.. <i>American Family Physician.</i> 2008/02/15/. 77:423                                                                                                                                                                                                                                                                                                                  | Level 1, Form<br>Title/abstract<br>screen |
| 3827 | <b>Montauk SL.</b> The homeless in America: adapting your practice.. <i>American Family Physician.</i> 2006/10//10/1/2006. 74:1132                                                                                                                                                                                                                                                       | Level 1, Form<br>Title/abstract<br>screen |
| 3828 | <b>Lehman AF,Lieberman JA,Dixon LB,McGlashan TH,Miller AL,Perkins DO,Kreyenbuhl J, Anthony F Lehman, Jeffrey A Lieberman, Lisa B Dixon, Thomas H McGlashan, Alexander L Miller, Diana O Perkins, Julie Kreyenbuhl.</b> Practice guideline for the treatment of patients with schizophrenia, second edition.. <i>American Journal of Psychiatry.</i> 2004/02/02/Feb2004 Supplement. 161:1 | Level 1, Form<br>Title/abstract<br>screen |
| 3829 | <b>Manderscheid RW.</b> Perspectives. A room in the medical home: consumers deserve 'first-floor' access to mental and substance use care in collaborative care systems.. <i>Behavioral Healthcare.</i> 2007/10//. 27:45                                                                                                                                                                 | Level 1, Form<br>Title/abstract<br>screen |
| 3831 | <b>Wade D,Johnston A,Campbell B,Littlefield L.</b> Early intervention services in youth mental health.. <i>Clinical Psychologist.</i> 2007/10//. 11:108                                                                                                                                                                                                                                  | Level 1, Form<br>Title/abstract<br>screen |
| 3832 | <b>Cheung AH.</b> Review: more high quality studies needed to determine the effects on patient outcomes of psychiatric care guideline implementation.. <i>Evidence Based Mental Health.</i> 2008/02//. 11:21                                                                                                                                                                             | Level 1, Form<br>Title/abstract<br>screen |
| 3833 | <b>Gilbody SM.</b> IMPACT collaborative care programme reduces suicide ideation in depressed older adults.. <i>Evidence Based Mental Health.</i> 2007/05//. 10:51                                                                                                                                                                                                                        | Level 1, Form<br>Title/abstract<br>screen |
| 3835 | <b>Troum OM,Cruess JV III.</b> The young adult with hip pain: diagnosis and medical treatment, circa 2004.. <i>Clinical Orthopaedics &amp; Related Research.</i>                                                                                                                                                                                                                         | Level 1, Form<br>Title/abstract           |

|      |                                                                                                                                                                                                                                                                                                  |                                           |
|------|--------------------------------------------------------------------------------------------------------------------------------------------------------------------------------------------------------------------------------------------------------------------------------------------------|-------------------------------------------|
|      | 2004/01//2004 Jan. 418:9                                                                                                                                                                                                                                                                         | screen                                    |
| 3836 | <b>Felix-Aaron K, Moy E, Kang M, Patel M, Chesley FD, Clancy C.</b> Variation in quality of men's health care by race/ethnicity and social class.. <i>Medical Care</i> . 2005/03/02/2005 Mar Supplement. 43:I                                                                                    | Level 1, Form<br>Title/abstract<br>screen |
| 3838 | <b>Barker P.</b> Psychotherapy series. The humanistic therapies... second of five articles.. <i>Nursing Times</i> . 1998/02/11/1998 Feb 11-17. 94:52                                                                                                                                             | Level 1, Form<br>Title/abstract<br>screen |
| 3839 | <b>Miller WR.</b> Motivational interviewing in service to health promotion.. <i>American Journal of Health Promotion</i> . 2004/01//Jan/Feb2004. 18:N                                                                                                                                            | Level 1, Form<br>Title/abstract<br>screen |
| 3840 | <b>Goering P.</b> Collaborative care speeds recovery from depression.. <i>Evidence Based Mental Health</i> . 2003/11//. 6:116                                                                                                                                                                    | Level 1, Form<br>Title/abstract<br>screen |
| 3841 | <b>Christman SK.</b> Intervention to slow progression of peripheral arterial disease.. <i>Intervention to Slow Progression of Peripheral Arterial Disease</i> . 2003/01//. #volume#:123 p                                                                                                        | Level 1, Form<br>Title/abstract<br>screen |
| 3842 | . CSAT and NIDA promote use of the ASI for treatment planning.. <i>Alcoholism &amp; Drug Abuse Weekly</i> . 2006/10/30/. 18:7                                                                                                                                                                    | Level 1, Form<br>Title/abstract<br>screen |
| 3843 | . Collaborative care for acutely injured trauma survivors can reduce post-traumatic distress symptoms and alcohol abuse.. <i>AHRQ Research Activities</i> . 2004/09//2004 Sep. #volume#:19                                                                                                       | Level 1, Form<br>Title/abstract<br>screen |
| 3844 | <b>Bisson JI.</b> Trauma-focused group psychotherapy is not effective for posttraumatic stress disorder in Vietnam veterans.. <i>Evidence Based Mental Health</i> . 2003/11//. 6:124                                                                                                             | Level 1, Form<br>Title/abstract<br>screen |
| 3847 | <b>Nowak F, Nagle L, Bernardo A.</b> Review: case management programmes improve patient outcomes [commentary on Ferguson JA, Weinberger M. Case management programs in primary care. <i>J GEN INTERN MED</i> 1998 Feb;13:123-6].. <i>Evidence Based Nursing</i> . 1998/10//. #volume#:128        | Level 1, Form<br>Title/abstract<br>screen |
| 3848 | <b>Bienkowski J.</b> An overview of the progression of diabetic retinopathy with treatment recommendations.. <i>Nurse Practitioner</i> . 1994/07//1994 Jul. 19:50                                                                                                                                | Level 1, Form<br>Title/abstract<br>screen |
| 3850 | <b>Shakeshaft A, Clifford A, Shakeshaft M.</b> Reducing alcohol related harm experienced by Indigenous Australians: identifying opportunities for Indigenous primary health care services.. <i>Australian &amp; New Zealand Journal of Public Health</i> . 2010/07/02/Jul2010 Supplement. 34:S41 | Level 1, Form<br>Title/abstract<br>screen |
| 3851 | <b>Gutman SA.</b> The psychosocial sequelae of traumatic brain injury, part II: treatment.. <i>OT Practice</i> . 2001/03/06/2001 Mar 5 Suppl. 6:CE                                                                                                                                               | Level 1, Form<br>Title/abstract<br>screen |
| 3855 | <b>M. Zhang, C. C. Yang, Jee.</b> Classifying User Intention and Social Support Types in Online Healthcare Discussions. <i>2014 Ieee International Conference on Healthcare Informatics</i> . 2014. #volume#:51-60                                                                               | Level 1, Form<br>Title/abstract<br>screen |
| 3857 | <b>D. Zatzick, J. Russo, F. Rivara, P. Roy-Byrne, G. Jurkovich, W. Katon.</b> The detection and treatment of posttraumatic distress and substance intoxication in the acute care inpatient setting. <i>General Hospital Psychiatry</i> . 2005. 27:57-62                                          | Level 1, Form<br>Title/abstract<br>screen |
| 3864 | <b>E. K. Yuen, E. M. Goetter, J. D. Herbert, E. M. Forman.</b> Challenges and Opportunities in Internet-Mediated Telemental Health. <i>Professional Psychology-Research and Practice</i> . 2012. 43:1-8                                                                                          | Level 1, Form<br>Title/abstract<br>screen |



|      |                                                                                                                                                                                                                                                                                                                                                                     |                                           |
|------|---------------------------------------------------------------------------------------------------------------------------------------------------------------------------------------------------------------------------------------------------------------------------------------------------------------------------------------------------------------------|-------------------------------------------|
| 3865 | <b>D. A. Young, M. Shumway, A. Flentje, E. D. Riley.</b> The Relationship Between Childhood Abuse and Violent Victimization in Homeless and Marginally Housed Women: The Role of Dissociation as a Potential Mediator. <i>Psychological Trauma-Theory Research Practice and Policy</i> . 2017. 9:613-621                                                            | Level 1, Form<br>Title/abstract<br>screen |
| 3866 | <b>B. J. H. Yarborough, S. P. Stumbo, D. McCarty, J. Mertens, C. Weisner, C. A. Green.</b> Methadone, buprenorphine and preferences for opioid agonist treatment: A qualitative analysis. <i>Drug and Alcohol Dependence</i> . 2016. 160:112-118                                                                                                                    | Level 1, Form<br>Title/abstract<br>screen |
| 3870 | <b>H. Yaman, M. Akdeniz, E. Katirci.</b> DIABETES EDUCATION IN PRIMARY CARE AND THE 5 MINUTE SURVIVAL KIT. <i>Nobel Medicus</i> . 2010. 6:5-9                                                                                                                                                                                                                       | Level 1, Form<br>Title/abstract<br>screen |
| 3872 | <b>R. Wynn, K. Karlsen, B. Lorntzen, T. N. Bjerke, S. Bergvik.</b> Users' and GPs' causal attributions of illegal substance use: An exploratory interview study. <i>Patient Education and Counseling</i> . 2009. 76:227-232                                                                                                                                         | Level 1, Form<br>Title/abstract<br>screen |
| 3877 | <b>Y. Woodhead, D. Cameron, S. Blackwell, F. W. Seymour.</b> Family Court Judges' Decisions Regarding Post-Separation Care Arrangements for Young Children. <i>Psychiatry Psychology and Law</i> . 2015. 22:520-534                                                                                                                                                 | Level 1, Form<br>Title/abstract<br>screen |
| 3878 | <b>J. Wood, K. Crew, R. Kukafka, J. Finkelstein, Jee.</b> A Comprehensive Informatics Framework to Increase Breast Cancer Risk Assessment and Chemoprevention in the Primary Care Setting. <i>2016 Ieee International Conference on Healthcare Informatics</i> . 2016. #volume#:293-296                                                                             | Level 1, Form<br>Title/abstract<br>screen |
| 3885 | <b>T. M. Winhusen, F. Kropp.</b> Psychosocial treatments for women with substance use disorders. <i>Obstetrics and Gynecology Clinics of North America</i> . 2003. 30:483-+                                                                                                                                                                                         | Level 1, Form<br>Title/abstract<br>screen |
| 3886 | <b>T. E. Wilson, E. S. Kay, B. Turan, M. O. Johnson, M. C. Kempf, J. M. Turan, M. H. Cohen, A. A. Adimora, M. Pereyra, E. T. Golub, L. Goparaju, L. Murchison, G. M. Wingood, L. R. Metsch.</b> Healthcare Empowerment and HIV Viral Control: Mediating Roles of Adherence and Retention in Care. <i>American Journal of Preventive Medicine</i> . 2018. 54:756-764 | Level 1, Form<br>Title/abstract<br>screen |
| 3887 | <b>S. Wilson, M. King, G. Yeowell, C. Wibberley.</b> Disclosure decisions within transition narratives: How ex-drug users decide what information to share when working toward employment in the substance misuse field. <i>Journal of Substance Use</i> . 2016. 21:575-580                                                                                         | Level 1, Form<br>Title/abstract<br>screen |
| 3888 | <b>M. Wilson, J. M. Roll, C. Corbett, C. Barbosa-Leiker.</b> Empowering Patients with Persistent Pain Using an Internet-based Self-Management Program. <i>Pain Management Nursing</i> . 2015. 16:503-514                                                                                                                                                            | Level 1, Form<br>Title/abstract<br>screen |
| 3892 | <b>G. C. Williams, H. A. McGregor, D. King, C. C. Nelson, R. E. Glasgow.</b> Variation in perceived competence, glycemic control, and patient satisfaction: relationship to autonomy support from physicians. <i>Patient Education and Counseling</i> . 2005. 57:39-45                                                                                              | Level 1, Form<br>Title/abstract<br>screen |
| 3893 | <b>I. R. Wiechers, O. Freudenreich.</b> The Role of Consultation-Liaison Psychiatrists in Improving Health Care of Patients with Schizophrenia. <i>Psychosomatics</i> . 2013. 54:22-27                                                                                                                                                                              | Level 1, Form<br>Title/abstract<br>screen |
| 3896 | <b>N. Weymann, M. Harter, F. Petrak, J. Dirmaier.</b> Health information, behavior change, and decision support for patients with type 2 diabetes: development of a tailored, preference-sensitive health communication application. <i>Patient Preference and Adherence</i> . 2013. 7:1091-1099                                                                    | Level 1, Form<br>Title/abstract<br>screen |
| 3901 | <b>I. Weissbecker, C. Clark.</b> The impact of violence and abuse on women's physical health: Can trauma-informed treatment make a difference?. <i>Journal of</i>                                                                                                                                                                                                   | Level 1, Form<br>Title/abstract<br>screen |

|      |                                                                                                                                                                                                                                                                                                                                                     |                                     |
|------|-----------------------------------------------------------------------------------------------------------------------------------------------------------------------------------------------------------------------------------------------------------------------------------------------------------------------------------------------------|-------------------------------------|
|      | <i>Community Psychology</i> . 2007. 35:909-923                                                                                                                                                                                                                                                                                                      | screen                              |
| 3911 | <b>K. Waters, S. Holttum, I. Perrin</b> . Narrative and attachment in the process of recovery from substance misuse. <i>Psychology and Psychotherapy-Theory Research and Practice</i> . 2014. 87:222-236                                                                                                                                            | Level 2, Form Full Text Screening   |
| 3913 | <b>C. Wang, B. Cho, D. Xiao, D. Wajsbrodt, P. W. Park</b> . Effectiveness and safety of varenicline as an aid to smoking cessation: results of an inter-Asian observational study in real-world clinical practice. <i>International Journal of Clinical Practice</i> . 2013. 67:469-476                                                             | Level 1, Form Title/abstract screen |
| 3915 | <b>G. D. Walters</b> . Working alliance between substance abusing offenders and their parole officers and counselors: its impact on outcome and role as a mediator. <i>Journal of Crime &amp; Justice</i> . 2016. 39:421-437                                                                                                                        | Level 1, Form Title/abstract screen |
| 3916 | <b>G. D. Walters</b> . Proactive criminal thinking, cold heartedness, and counselor rapport in correctional clients participating in substance abuse treatment. <i>Personality and Individual Differences</i> . 2016. 98:239-243                                                                                                                    | Level 1, Form Title/abstract screen |
| 3918 | <b>T. von Braun, S. Larsson, Y. Sjoblom</b> . Narratives of Clients' Experiences of Drug Use and Treatment of Substance Use-Related Dependency. <i>Substance Use &amp; Misuse</i> . 2013. 48:1404-1415                                                                                                                                              | Level 1, Form Title/abstract screen |
| 3919 | <b>J. Volavka, R. A. Van Dorn, L. Citrome, R. S. Kahn, W. W. Fleischhacker, P. Czobor</b> . Hostility in schizophrenia: An integrated analysis of the combined Clinical Antipsychotic Trials of Intervention Effectiveness (CATIE) and the European First Episode Schizophrenia Trial (EUFEST) studies. <i>European Psychiatry</i> . 2016. 31:13-19 | Level 1, Form Title/abstract screen |
| 3921 | <b>I. Vogt</b> . Coercion and Quasi-Compulsory Settings in the Treatment of Substance Dependent Men and Women in Germany: a Review. <i>Suchttherapie</i> . 2012. 13:81-89                                                                                                                                                                           | Level 1, Form Title/abstract screen |
| 3924 | <b>A. Verdejo-Garcia, J. Verdejo-Roman, N. Albein-Urios, J. M. Martinez-Gonzalez, C. Soriano-Mas</b> . Brain substrates of social decision-making in dual diagnosis: cocaine dependence and personality disorders. <i>Addiction Biology</i> . 2017. 22:457-467                                                                                      | Level 1, Form Title/abstract screen |
| 3925 | <b>A. Verdejo-Garcia, A. Benbrook, F. Funderburk, P. David, J. L. Cadet, K. I. Bolla</b> . The differential relationship between cocaine use and marijuana use on decision-making performance over repeat testing with the Iowa Gambling Task. <i>Drug and Alcohol Dependence</i> . 2007. 90:2-11                                                   | Level 1, Form Title/abstract screen |
| 3927 | <b>K. L. Venner, H. Matzger, A. A. Forcehimes, R. H. Moos, S. W. Feldstein, M. L. Willenbring, C. Weisner</b> . Course of recovery from alcoholism. <i>Alcoholism-Clinical and Experimental Research</i> . 2006. 30:1079-1090                                                                                                                       | Level 1, Form Title/abstract screen |
| 3928 | <b>D. I. Velligan, P. J. Weiden, M. Sajatovic, J. Scott, D. Carpenter, R. Ross, J. P. Docherty</b> . The Expert Consensus Guideline Series: Adherence Problems in Patients with Serious and Persistent Mental Illness Introduction. <i>Journal of Clinical Psychiatry</i> . 2009. 70:6-46                                                           | Level 1, Form Title/abstract screen |
| 3930 | <b>J. K. Vederhus, T. Clausen, K. Humphreys</b> . Assessing understandings of substance use disorders among Norwegian treatment professionals, patients and the general public. <i>Bmc Health Services Research</i> . 2016. 16:10                                                                                                                   | Level 1, Form Title/abstract screen |
| 3939 | <b>R. A. Van Dorn, K. J. Grimm, S. L. Desmarais, S. J. Tueller, K. L. Johnson, M. S. Swartz</b> . Leading indicators of community-based violent events among adults with mental illness. <i>Psychological Medicine</i> . 2017. 47:1179-1191                                                                                                         | Level 1, Form Title/abstract screen |
| 3940 | <b>R. A. Van Dorn, E. B. Elbogen, A. D. Redlich, J. W. Swanson, M. S. Swartz, S. Mustillo</b> . The relationship between mandated community treatment and perceived barriers to care in persons with severe mental illness. <i>International</i>                                                                                                    | Level 1, Form Title/abstract screen |

|      |                                                                                                                                                                                                                                                                                                                                                                                                                |                                     |
|------|----------------------------------------------------------------------------------------------------------------------------------------------------------------------------------------------------------------------------------------------------------------------------------------------------------------------------------------------------------------------------------------------------------------|-------------------------------------|
|      | <i>Journal of Law and Psychiatry</i> . 2006. 29:495-506                                                                                                                                                                                                                                                                                                                                                        |                                     |
| 3944 | <b>D. Urada, C. Teruya, L. Gelberg, R. Rawson.</b> Integration of substance use disorder services with primary care: health center surveys and qualitative interviews. <i>Substance Abuse Treatment Prevention and Policy</i> . 2014. 9:9                                                                                                                                                                      | Level 1, Form Title/abstract screen |
| 3948 | <b>S. G. Trusz, A. W. Wagner, J. Russo, J. Love, D. E. Zatzick.</b> Assessing Barriers to Care and Readiness for Cognitive Behavioral Therapy in Early Acute Care PTSD Interventions. <i>Psychiatry-Interpersonal and Biological Processes</i> . 2011. 74:207-223                                                                                                                                              | Level 1, Form Title/abstract screen |
| 3949 | <b>K. J. Trudeau, R. A. Black, J. L. Kamon, S. Sussman.</b> A Randomized Controlled Trial of an Online Relapse Prevention Program for Adolescents in Substance Abuse Treatment. <i>Child &amp; Youth Care Forum</i> . 2017. 46:437-454                                                                                                                                                                         | Level 1, Form Title/abstract screen |
| 3950 | <b>R. B. Trivedi, J. A. Nieuwsma, J. W. Williams.</b> Examination of the Utility of Psychotherapy for Patients with Treatment Resistant Depression: A Systematic Review. <i>Journal of General Internal Medicine</i> . 2011. 26:643-650                                                                                                                                                                        | Level 1, Form Title/abstract screen |
| 3951 | <b>M. H. Trivedi, E. J. Daly.</b> Measurement-based care for refractory depression: A clinical decision support model for clinical research and practice. <i>Drug and Alcohol Dependence</i> . 2007. 88:S61-S71                                                                                                                                                                                                | Level 1, Form Title/abstract screen |
| 3952 | <b>E. Tomba.</b> Assessment of Lifestyle in Relation to Health. <i>Psychosomatic Assessment: Strategies to Improve Clinical Practice</i> . 2012. 32:72-96                                                                                                                                                                                                                                                      | Level 1, Form Title/abstract screen |
| 3955 | <b>B. L. Tjep, M. C. Barnett.</b> Disease Management for Chronic Obstructive Pulmonary Disease A Clinical Strategy. <i>Disease Management &amp; Health Outcomes</i> . 2008. 16:305-313                                                                                                                                                                                                                         | Level 1, Form Title/abstract screen |
| 3959 | <b>N. Tejani, R. Rosenheck, J. Tsai, W. Kaspro, J. F. McGuire.</b> Incarceration Histories of Homeless Veterans and Progression Through a National Supported Housing Program. <i>Community Mental Health Journal</i> . 2014. 50:514-519                                                                                                                                                                        | Level 1, Form Title/abstract screen |
| 3961 | <b>D. I. Taylor, C. Lennings, Alcohol, F. D. N. Drug.</b> Ethical decision-making and convergence of views between doctors and long-term prescribed opiate users. <i>Drugs - Policies, Programs and People - 1996 Conference Papers</i> . 1996. #volume#:248-253                                                                                                                                               | Level 1, Form Title/abstract screen |
| 3962 | <b>C. Tarquinio, J. Kivits, L. Minary, J. Coste, F. Alla.</b> Evaluating complex interventions: Perspectives and issues for health behaviour change interventions. <i>Psychology &amp; Health</i> . 2015. 30:35-51                                                                                                                                                                                             | Level 1, Form Title/abstract screen |
| 3963 | <b>O. Taieb, S. Chevret, M. R. Moro, M. G. Weiss, A. Biadi-Imhof, A. Reyre, T. Baubet.</b> Impact of Migration on Explanatory Models of Illness and Addiction Severity in Patients With Drug Dependence in a Paris Suburb. <i>Substance Use &amp; Misuse</i> . 2012. 47:347-355                                                                                                                                | Level 1, Form Title/abstract screen |
| 3966 | <b>H. Sweeting.</b> WORKSHOP - COLLABORATIVE CARE FOR ALCOHOL MISUSE - APPROACH TO PHARMACOLOGICAL TREATMENT. <i>Drug and Alcohol Review</i> . 2010. 29:73-74                                                                                                                                                                                                                                                  | Level 1, Form Title/abstract screen |
| 3968 | <b>E. C. Sundin, T. Baguley.</b> Prevalence of childhood abuse among people who are homeless in Western countries: a systematic review and meta-analysis. <i>Social Psychiatry and Psychiatric Epidemiology</i> . 2015. 50:183-194                                                                                                                                                                             | Level 1, Form Title/abstract screen |
| 3969 | <b>Y. Sun, L. Y. Zhao, G. B. Wang, W. H. Yue, Y. He, N. Shu, Q. X. Lin, F. Wang, J. L. Li, N. Chen, H. M. Wang, T. R. Kosten, J. J. Feng, J. Wang, Y. D. Tang, S. X. Liu, G. F. Deng, G. H. Diao, Y. L. Tan, H. B. Han, L. Lin, J. Shi.</b> ZNF804A variants confer risk for heroin addiction and affect decision making and gray matter volume in heroin abusers. <i>Addiction Biology</i> . 2016. 21:657-666 | Level 1, Form Title/abstract screen |

|      |                                                                                                                                                                                                                                                                                      |                                           |
|------|--------------------------------------------------------------------------------------------------------------------------------------------------------------------------------------------------------------------------------------------------------------------------------------|-------------------------------------------|
| 3973 | <b>C. S. Stover.</b> Commentary: Factors Predicting Family Court Decisions in High-Conflict Divorce. <i>Journal of the American Academy of Psychiatry and the Law.</i> 2013. 41:219-223                                                                                              | Level 1, Form<br>Title/abstract<br>screen |
| 3975 | <b>J. M. Stoffers, B. A. Vollm, G. Rucker, A. Timmer, N. Huband, K. Lieb.</b> Psychological therapies for people with borderline personality disorder. <i>Cochrane Database of Systematic Reviews.</i> 2012. #volume#:256                                                            | Level 1, Form<br>Title/abstract<br>screen |
| 3977 | <b>M. T. Stewart, C. M. Horgan, A. E. Quinn, D. W. Garnick, S. Reif, T. B. Creedon, E. L. Merrick.</b> The Role of Health Plans in Supporting Behavioral Health Integration. <i>Administration and Policy in Mental Health and Mental Health Services Research.</i> 2017. 44:967-977 | Level 1, Form<br>Title/abstract<br>screen |
| 3979 | <b>C. M. Stephen, O. S. Hermiz, E. J. Halcomb, S. McInnes, N. Zwar.</b> Feasibility and acceptability of a nurse-led hypertension management intervention in general practice. <i>Collegian.</i> 2018. 25:33-38                                                                      | Level 1, Form<br>Title/abstract<br>screen |
| 3982 | <b>B. Spring.</b> Health Decision Making: Lynchpin of Evidence-Based Practice. <i>Medical Decision Making.</i> 2008. 28:866-874                                                                                                                                                      | Level 1, Form<br>Title/abstract<br>screen |
| 3983 | <b>H. Spielvogel, C. A. McCarty, L. P. Richardson.</b> Brief Therapy for Anxiety and Depression in the Pediatric Primary Care Setting Implications and Next Steps. <i>Jama Pediatrics.</i> 2017. 171:1006-1007                                                                       | Level 1, Form<br>Title/abstract<br>screen |
| 3984 | <b>N. A. Sowa, A. Bengtson, B. N. Gaynes, B. W. Pence.</b> Predictors of depression recovery in HIV-infected individuals managed through measurement-based care in infectious disease clinics. <i>Journal of Affective Disorders.</i> 2016. 192:153-161                              | Level 1, Form<br>Title/abstract<br>screen |
| 3985 | <b>E. Sorensen, J. Goldman, M. Ward, I. Albanese, L. Graves, C. Chamberlain.</b> JUDICIAL DECISION-MAKING IN CONTESTED CUSTODY CASES - THE INFLUENCE OF REPORTED CHILD-ABUSE, SPOUSE ABUSE, AND PARENTAL SUBSTANCE-ABUSE. <i>Child Abuse &amp; Neglect.</i> 1995. 19:251-260         | Level 1, Form<br>Title/abstract<br>screen |
| 3986 | <b>T. M. Sokhadze, R. L. Cannon, D. L. Trudeau.</b> EEG biofeedback as a treatment for substance use disorders: Review, rating of efficacy, and recommendations for further research. <i>Applied Psychophysiology and Biofeedback.</i> 2008. 33:1-28                                 | Level 1, Form<br>Title/abstract<br>screen |
| 3987 | <b>T. Soh, A. Lovett.</b> COLLABORATIVE CARE FOR ALCOHOL MISUSE - EXPLORING THE ROLE OF ADDICTION MEDICINE SPECIALISTS. <i>Drug and Alcohol Review.</i> 2010. 29:74-74                                                                                                               | Level 1, Form<br>Title/abstract<br>screen |
| 3991 | <b>R. G. Smith.</b> An Appraisal of Potential Drug Interactions in Cigarette Smokers and Alcohol Drinkers. <i>Journal of the American Podiatric Medical Association.</i> 2009. 99:81-88                                                                                              | Level 1, Form<br>Title/abstract<br>screen |
| 3992 | <b>M. Y. Smith, J. D. Depue, C. Rini.</b> Computerized decision-support systems for chronic pain management in primary care. <i>Pain Medicine.</i> 2007. 8:S155-S166                                                                                                                 | Level 1, Form<br>Title/abstract<br>screen |
| 3995 | <b>C. S. Skinner, K. I. Pollak, D. Farrell, M. K. Olsen, A. S. Jeffreys, J. A. Tulsy.</b> Use of and reactions to a tailored CD-ROM designed to enhance oncologist-patient communication: The SCOPE trial intervention. <i>Patient Education and Counseling.</i> 2009. 77:90-96      | Level 1, Form<br>Title/abstract<br>screen |
| 3996 | <b>J. Skeem, J. E. Louden, S. Manchak, S. Vidal, E. Haddad.</b> Social Networks and Social Control of Probationers with Co-Occurring Mental and Substance Abuse Problems. <i>Law and Human Behavior.</i> 2009. 33:122-135                                                            | Level 1, Form<br>Title/abstract<br>screen |
| 3999 | <b>J. M. A. Sinclair, S. E. Chambers, C. C. Manson.</b> Internet Support for Dealing with Problematic Alcohol Use: A Survey of the Soberistas Online                                                                                                                                 | Level 1, Form<br>Title/abstract           |

|      |                                                                                                                                                                                                                                                                                                                                                                                                 |                                           |
|------|-------------------------------------------------------------------------------------------------------------------------------------------------------------------------------------------------------------------------------------------------------------------------------------------------------------------------------------------------------------------------------------------------|-------------------------------------------|
|      | Community. <i>Alcohol and Alcoholism</i> . 2017. 52:220-226                                                                                                                                                                                                                                                                                                                                     | screen                                    |
| 4001 | <b>R. Shrestha, P. Karki, F. L. Altice, O. Dubov, L. Fraenkel, T. Huedo-Medina, M. Copenhaver.</b> Measuring Acceptability and Preferences for Implementation of Pre-Exposure Prophylaxis (PrEP) Using Conjoint Analysis: An Application to Primary HIV Prevention Among High Risk Drug Users. <i>Aids and Behavior</i> . 2018. 22:1228-1238                                                    | Level 1, Form<br>Title/abstract<br>screen |
| 4013 | <b>L. Shattock, K. Berry, A. Degnan, D. Edge.</b> Therapeutic alliance in psychological therapy for people with schizophrenia and related psychoses: A systematic review. <i>Clinical Psychology &amp; Psychotherapy</i> . 2018. 25:E60-E85                                                                                                                                                     | Level 1, Form<br>Title/abstract<br>screen |
| 4014 | <b>F. Shapiro, S. Vogelmannsine, L. F. Sine.</b> EYE-MOVEMENT DESENSITIZATION AND REPROCESSING - TREATING TRAUMA AND SUBSTANCE-ABUSE. <i>Journal of Psychoactive Drugs</i> . 1994. 26:379-391                                                                                                                                                                                                   | Level 2, Form<br>Full Text<br>Screening   |
| 4015 | <b>A. A. Shalaby, G. E. Brumberg, L. Pointer, D. B. Bekelman, J. S. Rumsfeld, Y. F. Yang, C. N. Pellegrini, P. A. Heidenreich, E. Keung, B. M. Massie, P. D. Varosy.</b> Depression and Outcome among Veterans with Implantable Cardioverter Defibrillators with or without Cardiac Resynchronization Therapy Capability. <i>Pace-Pacing and Clinical Electrophysiology</i> . 2014. 37:994-1001 | Level 1, Form<br>Title/abstract<br>screen |
| 4017 | <b>G. Sescousse.</b> Gambling addiction: insights from neuroscience and neuroimaging. <i>M S-Medecine Sciences</i> . 2015. 31:784-791                                                                                                                                                                                                                                                           | Level 1, Form<br>Title/abstract<br>screen |
| 4024 | <b>A. C. Schulte, J. E. Easton, J. Parker.</b> Advances in Treatment Integrity Research: Multidisciplinary Perspectives on the Conceptualization, Measurement, and Enhancement of Treatment Integrity. <i>School Psychology Review</i> . 2009. 38:460-475                                                                                                                                       | Level 1, Form<br>Title/abstract<br>screen |
| 4025 | <b>L. Schmidt, T. Greenfield, N. Mulia.</b> Unequal treatment - Racial and ethnic disparities in alcoholism treatment services. <i>Alcohol Research &amp; Health</i> . 2006. 29:49-54                                                                                                                                                                                                           | Level 1, Form<br>Title/abstract<br>screen |
| 4029 | <b>I. Schafer, L. Gromus, A. Atabaki, S. Pawils, U. Verthein, J. Reimer, B. Schulte, M. Martens.</b> Are experiences of sexual violence related to special needs in patients with substance use disorders? A study in opioid-dependent patients. <i>Addictive Behaviors</i> . 2014. 39:1691-1694                                                                                                | Level 1, Form<br>Title/abstract<br>screen |
| 4030 | <b>A. J. Saxon, D. A. Calsyn, E. A. Wells, V. V. Stanton.</b> The use of urine toxicology to enhance patient control of take-home doses in methadone maintenance: Effects on reducing illicit drug use. <i>Addiction Research</i> . 1998. 6:203-214                                                                                                                                             | Level 2, Form<br>Full Text<br>Screening   |
| 4032 | <b>A. S. A. Sawares, N. Shen, Y. L. Xue, A. Abi-Jaoude, D. Wiljer.</b> The Impact of Mobile Apps on Alcohol Use Disorder: A Systematic Review Protocol. <i>Jmir Research Protocols</i> . 2017. 6:8                                                                                                                                                                                              | Level 1, Form<br>Title/abstract<br>screen |
| 4035 | <b>J. M. Sales, A. Swartzendruber, A. L. Phillips.</b> Trauma-Informed HIV Prevention and Treatment. <i>Current Hiv/Aids Reports</i> . 2016. 13:374-382                                                                                                                                                                                                                                         | Level 1, Form<br>Title/abstract<br>screen |
| 4036 | <b>M. Sajatovic, R. V. Ignacio, J. A. West, K. A. Cassidy, R. Safavi, A. M. Kilbourne, F. C. Blow.</b> Predictors of nonadherence among individuals with bipolar disorder receiving treatment in a community mental health clinic. <i>Comprehensive Psychiatry</i> . 2009. 50:100-107                                                                                                           | Level 1, Form<br>Title/abstract<br>screen |
| 4039 | <b>S. Saha, M. Freeman, J. Toure, K. M. Tippens, C. Weeks, S. Ibrahim.</b> Racial and ethnic disparities in the VA health care system: A systematic review. <i>Journal of General Internal Medicine</i> . 2008. 23:654-671                                                                                                                                                                      | Level 1, Form<br>Title/abstract<br>screen |
| 4042 | <b>P. Saarnio.</b> Therapists' big five personality traits and interpersonal functioning                                                                                                                                                                                                                                                                                                        | Level 1, Form                             |

|      |                                                                                                                                                                                                                                                                                                                                                                                                                                                 |                                     |
|------|-------------------------------------------------------------------------------------------------------------------------------------------------------------------------------------------------------------------------------------------------------------------------------------------------------------------------------------------------------------------------------------------------------------------------------------------------|-------------------------------------|
|      | in the substance abuse field: A cluster-analytic study. <i>Journal of Substance Use</i> . 2011. 16:348-358                                                                                                                                                                                                                                                                                                                                      | Title/abstract screen               |
| 4043 | <b>S. Ryan, J. Hislop, S. Ziebland.</b> Do we all agree what "good health care" looks like? Views from those who are "seldom heard" in health research, policy and service improvement. <i>Health Expectations</i> . 2017. 20:878-885                                                                                                                                                                                                           | Level 1, Form Title/abstract screen |
| 4044 | <b>R. Ryan, N. Santesso, D. Lowe, S. Hill, J. Grimshaw, M. Prictor, C. Kaufman, G. Cowie, M. Taylor.</b> Interventions to improve safe and effective medicines use by consumers: an overview of systematic reviews. <i>Cochrane Database of Systematic Reviews</i> . 2014. #volume#:74                                                                                                                                                          | Level 1, Form Title/abstract screen |
| 4045 | <b>L. Rutkow, K. C. Smith, A. Y. H. Lai, J. S. Vernick, C. S. Davis, G. C. Alexander.</b> Prescription drug monitoring program design and function: A qualitative analysis. <i>Drug and Alcohol Dependence</i> . 2017. 180:395-400                                                                                                                                                                                                              | Level 1, Form Title/abstract screen |
| 4051 | <b>M. A. Rosemberg, L. Gultekin, M. Pardee.</b> High-ACE Low Wage Workers Occupational Health Nursing Research and Praxis Through a Trauma-Informed Lens. <i>Workplace Health &amp; Safety</i> . 2018. 66:233-240                                                                                                                                                                                                                               | Level 1, Form Title/abstract screen |
| 4060 | <b>S. Robie, M. J. Dill, R. S. Hooker.</b> Commentaries on health services research. <i>Jaapa-Journal of the American Academy of Physician Assistants</i> . 2016. 29:2                                                                                                                                                                                                                                                                          | Level 1, Form Title/abstract screen |
| 4062 | <b>M. Rivalan, S. H. Ahmed, F. Dellu-Hagedorn.</b> Risk-Prone Individuals Prefer the Wrong Options on a Rat Version of the Iowa Gambling Task. <i>Biological Psychiatry</i> . 2009. 66:743-749                                                                                                                                                                                                                                                  | Level 1, Form Title/abstract screen |
| 4071 | <b>A. M. F. Reiter, L. Deserno, T. Wilbertz, H. J. Heinze, F. Schlagenhaut.</b> Risk Factors for Addiction and Their Association with Model-Based Behavioral Control. <i>Frontiers in Behavioral Neuroscience</i> . 2016. 10:12                                                                                                                                                                                                                 | Level 1, Form Title/abstract screen |
| 4072 | <b>S. D. Reed, Y. H. Li, S. Kamble, D. Polsky, F. L. Graham, M. T. Bowers, G. P. Samsa, S. Paul, K. A. Schulman, D. J. Whellan, B. J. Riegel.</b> Introduction of the Tools for Economic Analysis of Patient Management Interventions in Heart Failure Costing Tool A User-Friendly Spreadsheet Program to Estimate Costs of Providing Patient-Centered Interventions. <i>Circulation-Cardiovascular Quality and Outcomes</i> . 2012. 5:113-119 | Level 1, Form Title/abstract screen |
| 4074 | <b>L. Rayner, A. Simpson, F. Matcham, S. Shetty, O. Lahoti, G. Groom, M. Hotopf.</b> Mental disorder in limb reconstruction: Prevalence, associations and impact on work disability. <i>Journal of Psychosomatic Research</i> . 2016. 89:53-60                                                                                                                                                                                                  | Level 1, Form Title/abstract screen |
| 4078 | <b>J. Raisler.</b> Midwifery care research: What questions are being asked? What lessons have been learned?. <i>Journal of Midwifery &amp; Womens Health</i> . 2000. 45:20-36                                                                                                                                                                                                                                                                   | Level 1, Form Title/abstract screen |
| 4079 | <b>A. R. Rabinowitz, W. Dundon, H. M. Pettinati, D. Oslin, T. Whittingham, C. Makadon.</b> Supportive medical management treatment and the therapeutic alliance in the treatment of alcohol dependence. <i>Alcoholism-Clinical and Experimental Research</i> . 2006. 30:98A-98A                                                                                                                                                                 | Level 2, Form Full Text Screening   |
| 4080 | <b>R. A. Rabin, K. Kozak, K. K. Zakzanis, G. Remington, C. Stefan, A. J. Budney, T. P. George.</b> A method to achieve extended cannabis abstinence in cannabis dependent patients with schizophrenia and non-psychiatric controls. <i>Schizophrenia Research</i> . 2018. 194:47-54                                                                                                                                                             | Level 1, Form Title/abstract screen |
| 4083 | <b>S. Price, J. Goyette.</b> Role of the psychiatrist in the care of patients with hepatitis C and HIV/AIDS. <i>Psychiatric Quarterly</i> . 2003. 74:261-276                                                                                                                                                                                                                                                                                    | Level 1, Form Title/abstract screen |
| 4089 | <b>P. Pinderup.</b> Training Changes Professionals' Attitudes Towards Dual Diagnosis. <i>International Journal of Mental Health and Addiction</i> . 2017. 15:53-                                                                                                                                                                                                                                                                                | Level 1, Form Title/abstract        |

|      |                                                                                                                                                                                                                                                                                          |                                     |
|------|------------------------------------------------------------------------------------------------------------------------------------------------------------------------------------------------------------------------------------------------------------------------------------------|-------------------------------------|
|      | 62                                                                                                                                                                                                                                                                                       | screen                              |
| 4091 | <b>R. Phillips, H. Bourne.</b> The impact of worker values on client outcomes within a drug treatment service. <i>International Journal of Drug Policy</i> . 2008. 19:33-41                                                                                                              | Level 2, Form Full Text Screening   |
| 4095 | <b>S. Petersen, P. Hutchings, G. Shrader, K. Brake.</b> Integrating Health Care: The Clear Advantage for Underserved Diverse Populations. <i>Psychological Services</i> . 2011. 8:69-81                                                                                                  | Level 1, Form Title/abstract screen |
| 4099 | <b>L. Penzenstadler, S. Kolly, S. Rothen, Y. Khazaal, U. Kramer.</b> Effects of substance use disorder on treatment process and outcome in a ten-session psychiatric treatment for borderline personality disorder. <i>Substance Abuse Treatment Prevention and Policy</i> . 2018. 13:11 | Level 1, Form Title/abstract screen |
| 4100 | <b>R. T. Penson, C. Nunn, J. Younger, N. J. Schaeffer, B. A. Chabner, G. L. Fricchione, T. E. Quinn, T. J. Lynch.</b> Trust violated: Analgesics for addicts. <i>Oncologist</i> . 2003. 8:199-209                                                                                        | Level 2, Form Full Text Screening   |
| 4110 | <b>V. Patel, R. Aroya, S. Chatterjee, D. Chisholm, A. Cohen, M. De Silva, C. Hosman, H. McGuire, G. Rojas, M. van Ommeren.</b> Global Mental Health 3 - Treatment and prevention of mental disorders in low-income and middle-income countries. <i>Lancet</i> . 2007. 370:991-1005       | Level 1, Form Title/abstract screen |
| 4111 | <b>T. W. Park, D. M. Cheng, J. H. Samet, M. R. Winter, R. Saitz.</b> Chronic Care Management for Substance Dependence in Primary Care Among Patients With Co-Occurring Disorders. <i>Psychiatric Services</i> . 2015. 66:72-79                                                           | Level 1, Form Title/abstract screen |
| 4112 | <b>B. Park, E. Beckman, C. Glatz, A. Pisansky, J. Song.</b> A place to heal: a qualitative focus group study of respite care preferences among individuals experiencing homelessness. <i>Journal of Social Distress and the Homeless</i> . 2017. 26:104-115                              | Level 1, Form Title/abstract screen |
| 4113 | <b>A. F. Parayre, M. Labrecque, M. Rousseau, S. Turcotte, F. Legare.</b> Validation of SURE, a Four-Item Clinical Checklist for Detecting Decisional Conflict in Patients. <i>Medical Decision Making</i> . 2014. 34:54-62                                                               | Level 1, Form Title/abstract screen |
| 4117 | <b>M. Ortendahl, J. F. Fries.</b> Discounting and risk characteristics in clinical decision-making. <i>Medical Science Monitor</i> . 2006. 12:RA41-RA45                                                                                                                                  | Level 1, Form Title/abstract screen |
| 4118 | <b>M. E. M. Ortega, J. C. C. Nieves, A. F. Zamora, P. L. Gelman, B. A. Palma.</b> Addictions, genomic findings. <i>Salud Mental</i> . 2012. 35:129-135                                                                                                                                   | Level 1, Form Title/abstract screen |
| 4120 | <b>V. V. Olsen, R. G. Lugo, S. Sutterlin.</b> The somatic marker theory in the context of addiction: contributions to understanding development and maintenance. <i>Psychology Research and Behavior Management</i> . 2015. 8:187-200                                                    | Level 1, Form Title/abstract screen |
| 4125 | <b>C. T. C. Okoli, J. K. Otachi, A. Manuel, M. Woods.</b> A cross-sectional analysis of factors associated with the intention to engage in tobacco treatment among inpatients in a state psychiatric hospital. <i>Journal of Psychiatric and Mental Health Nursing</i> . 2018. 25:14-25  | Level 1, Form Title/abstract screen |
| 4126 | <b>M. Oehl, M. Hummer, W. W. Fleischhacker.</b> Compliance with antipsychotic treatment. <i>Acta Psychiatrica Scandinavica</i> . 2000. 102:83-86                                                                                                                                         | Level 1, Form Title/abstract screen |
| 4131 | <b>H. P. O'Rourke, D. P. MacKinnon.</b> Reasons for Testing Mediation in the Absence of an Intervention Effect: A Research Imperative in Prevention and Intervention Research. <i>Journal of Studies on Alcohol and Drugs</i> . 2018. 79:171-181                                         | Level 1, Form Title/abstract screen |

|      |                                                                                                                                                                                                                                                                                                                                                    |                                           |
|------|----------------------------------------------------------------------------------------------------------------------------------------------------------------------------------------------------------------------------------------------------------------------------------------------------------------------------------------------------|-------------------------------------------|
| 4132 | <b>A. O'Brien, R. Fahmy, S. P. Singh.</b> Disengagement from mental health services. <i>Social Psychiatry and Psychiatric Epidemiology</i> . 2009. 44:558-568                                                                                                                                                                                      | Level 1, Form<br>Title/abstract<br>screen |
| 4133 | <b>A. Nyamathi, C. J. Reback, S. Shoptaw, B. E. Salem, S. Zhang, K. Yadav.</b> Impact of Tailored Interventions to Reduce Drug Use and Sexual Risk Behaviors Among Homeless Gay and Bisexual Men. <i>American Journal of Mens Health</i> . 2017. 11:208-220                                                                                        | Level 2, Form<br>Full Text<br>Screening   |
| 4135 | <b>C. W. Norwood, E. R. Wright.</b> Integration of prescription drug monitoring programs (PDMP) in pharmacy practice: Improving clinical decision-making and supporting a pharmacist's professional judgment. <i>Research in Social &amp; Administrative Pharmacy</i> . 2016. 12:257-266                                                           | Level 1, Form<br>Title/abstract<br>screen |
| 4140 | <b>V. K. Ngo, C. Sherbourne, B. W. Chung, L. Q. Tang, A. L. Wright, Y. Whittington, K. Wells, J. Miranda.</b> Community Engagement Compared With Technical Assistance to Disseminate Depression Care Among Low-Income, Minority Women: A Randomized Controlled Effectiveness Study. <i>American Journal of Public Health</i> . 2016. 106:1833-1841 | Level 1, Form<br>Title/abstract<br>screen |
| 4146 | <b>J. Neale, C. N. E. Tompkins, J. Strang.</b> Qualitative exploration of relationships between peers in residential addiction treatment. <i>Health &amp; Social Care in the Community</i> . 2018. 26:E39-E46                                                                                                                                      | Level 1, Form<br>Title/abstract<br>screen |
| 4147 | <b>A. D. Neacsu, J. W. Eberle, S. L. Keng, C. M. Fang, M. Z. Rosenthal.</b> Understanding Borderline Personality Disorder Across Sociocultural Groups: Findings, Issues, and Future Directions. <i>Current Psychiatry Reviews</i> . 2017. 13:188-223                                                                                               | Level 1, Form<br>Title/abstract<br>screen |
| 4150 | <b>L. M. Najavits, P. Crits-Christoph, A. Dierberger.</b> Clinicians' impact on the quality of substance use disorder treatment. <i>Substance Use &amp; Misuse</i> . 2000. 35:2161-2190                                                                                                                                                            | Level 2, Form<br>Full Text<br>Screening   |
| 4151 | <b>L. Nafradi, K. Nakamoto, P. J. Schulz.</b> Is patient empowerment the key to promote adherence? A systematic review of the relationship between self-efficacy, health locus of control and medication adherence. <i>Plos One</i> . 2017. 12:23                                                                                                  | Level 1, Form<br>Title/abstract<br>screen |
| 4153 | <b>R. Nadeau, K. Hasstedt, A. B. Sunstrum, C. Wagner, H. Tu.</b> Addressing the Opioid Epidemic: Impact of Opioid Prescribing Protocol at the University of Minnesota School of Dentistry. <i>Craniofacial Trauma &amp; Reconstruction</i> . 2018. 11:104-110                                                                                      | Level 1, Form<br>Title/abstract<br>screen |
| 4156 | <b>A. R. Muse, A. L. Lamson, K. W. Didericksen, J. L. Hodgson.</b> A Systematic Review of Evaluation Research in Integrated Behavioral Health Care: Operational and Financial Characteristics. <i>Families Systems &amp; Health</i> . 2017. 35:136-154                                                                                             | Level 1, Form<br>Title/abstract<br>screen |
| 4162 | <b>J. Morton, S. C. Konrad.</b> Introducing a Caring/Relational Framework for Building Relationships With Addicted Mothers. <i>Jognn-Journal of Obstetric Gynecologic and Neonatal Nursing</i> . 2009. 38:206-213                                                                                                                                  | Level 2, Form<br>Full Text<br>Screening   |
| 4167 | <b>M. Morash, D. A. Kashy, S. W. Smith, J. E. Cobina.</b> THE EFFECTS OF PROBATION OR PAROLE AGENT RELATIONSHIP STYLE AND WOMEN OFFENDERS' CRIMINOGENIC NEEDS ON OFFENDERS' RESPONSES TO SUPERVISION INTERACTIONS. <i>Criminal Justice and Behavior</i> . 2015. 42:412-434                                                                         | Level 1, Form<br>Title/abstract<br>screen |
| 4168 | <b>R. H. Moos.</b> Theory-based active ingredients of effective treatments for substance use disorders. <i>Drug and Alcohol Dependence</i> . 2007. 88:109-121                                                                                                                                                                                      | Level 1, Form<br>Title/abstract<br>screen |



|      |                                                                                                                                                                                                                                                                                                                                                                                                                                                                             |                                           |
|------|-----------------------------------------------------------------------------------------------------------------------------------------------------------------------------------------------------------------------------------------------------------------------------------------------------------------------------------------------------------------------------------------------------------------------------------------------------------------------------|-------------------------------------------|
| 4169 | <b>J. E. Moore, A. Mompe, E. Moy.</b> Disparities by Sex Tracked in the 2015 National Healthcare Quality and Disparities Report: Trends across National Quality Strategy Priorities, Health Conditions, and Access Measures. <i>Womens Health Issues.</i> 2018. 28:97-103                                                                                                                                                                                                   | Level 1, Form<br>Title/abstract<br>screen |
| 4170 | <b>I. D. Montoya, J. R. Schroeder, K. L. Preston, L. Covi, A. Umbricht, C. Contoreggi, P. J. Fudala, R. E. Johnson, D. A. Gorelick.</b> Influence of psychotherapy attendance on buprenorphine treatment outcome. <i>Journal of Substance Abuse Treatment.</i> 2005. 28:247-254                                                                                                                                                                                             | Level 1, Form<br>Title/abstract<br>screen |
| 4178 | <b>M. Mirsaedi, R. T. Sadikot.</b> Patients at High Risk of Tuberculosis Recurrence. <i>International Journal of Mycobacteriology.</i> 2018. 7:1-6                                                                                                                                                                                                                                                                                                                          | Level 1, Form<br>Title/abstract<br>screen |
| 4179 | <b>G. M. Mirdal, E. Ryding, M. E. Sondej.</b> Traumatized refugees, their therapists, and their interpreters: Three perspectives on psychological treatment. <i>Psychology and Psychotherapy-Theory Research and Practice.</i> 2012. 85:436-455                                                                                                                                                                                                                             | Level 1, Form<br>Title/abstract<br>screen |
| 4184 | <b>L. Mikesell.</b> Medicinal relationships: caring conversation. <i>Medical Education.</i> 2013. 47:443-452                                                                                                                                                                                                                                                                                                                                                                | Level 1, Form<br>Title/abstract<br>screen |
| 4185 | <b>M. M. Metzler, D. L. Higgins, C. G. Beeker, N. Freudenberg, P. M. Lantz, K. D. Senturia, A. A. Eisinger, E. A. Viruell-Fuentes, B. Geisar, A. G. Palermo, D. Softley.</b> Addressing urban health in Detroit, New York City, and Seattle through community-based participatory research partnerships. <i>American Journal of Public Health.</i> 2003. 93:803-811                                                                                                         | Level 1, Form<br>Title/abstract<br>screen |
| 4190 | <b>T. Meixner, K. Milligan, K. Urbanoski, K. McShane.</b> Conceptualizing integrated service delivery for pregnant and parenting women with addictions: Defining key factors and processes. <i>Canadian Journal of Addiction.</i> 2016. 7:57-65                                                                                                                                                                                                                             | Level 2, Form<br>Full Text<br>Screening   |
| 4193 | <b>P. S. Meier, D. Best.</b> Programme factors that influence completion of residential treatment. <i>Drug and Alcohol Review.</i> 2006. 25:349-355                                                                                                                                                                                                                                                                                                                         | Level 1, Form<br>Title/abstract<br>screen |
| 4197 | <b>B. D. McLeod, M. A. Southam-Gerow, C. B. Tully, A. Rodriguez, M. M. Smith.</b> Making a Case for Treatment Integrity as a Psychosocial Treatment Quality Indicator for Youth Mental Health Care. <i>Clinical Psychology-Science and Practice.</i> 2013. 20:14-32                                                                                                                                                                                                         | Level 1, Form<br>Title/abstract<br>screen |
| 4200 | <b>P. J. McGrath, A. Sourander, P. Lingley-Pottie, T. Ristkari, C. Cunningham, J. Huttunen, K. Filbert, M. Aromaa, P. Corkum, S. Hinkka-Yli-Salomaki, M. Kinnunen, K. Lampi, A. Penttinen, A. Sinokki, A. Unruh, J. Vuorio, C. Watters.</b> Remote population-based intervention for disruptive behavior at age four: study protocol for a randomized trial of Internet-assisted parent training (Strongest Families Finland-Canada). <i>Bmc Public Health.</i> 2013. 13:11 | Level 1, Form<br>Title/abstract<br>screen |
| 4204 | <b>D. McCarty, K. C. Priest, P. T. Korthuis.</b> Treatment and Prevention of Opioid Use Disorder: Challenges and Opportunities. <i>Annual Review of Public Health, Vol 39.</i> 2018. 39:525-541                                                                                                                                                                                                                                                                             | Level 1, Form<br>Title/abstract<br>screen |
| 4205 | <b>R. Mazza, M. Lina, R. Boffi, G. Invernizzi, C. De Marco, M. Pierotti.</b> Taking care of smoker cancer patients: a review and some recommendations. <i>Annals of Oncology.</i> 2010. 21:1404-1409                                                                                                                                                                                                                                                                        | Level 2, Form<br>Full Text<br>Screening   |
| 4206 | <b>V. M. Mays, A. L. Jones, A. Delany-Brumsey, C. Coles, S. D. Cochran.</b> Perceived Discrimination in Health Care and Mental Health/Substance Abuse Treatment Among Blacks, Latinos, and Whites. <i>Medical Care.</i> 2017. 55:173-                                                                                                                                                                                                                                       | Level 1, Form<br>Title/abstract<br>screen |

|      |                                                                                                                                                                                                                                                                                                                |                                           |
|------|----------------------------------------------------------------------------------------------------------------------------------------------------------------------------------------------------------------------------------------------------------------------------------------------------------------|-------------------------------------------|
|      | 181                                                                                                                                                                                                                                                                                                            |                                           |
| 4207 | <b>J. Mayeya, R. Chazulwa, P. N. Mayeya, E. Mbewe, L. M. Magolo, F. Kasisi, A. C. Bowa.</b> Zambia mental health country profile. <i>International Review of Psychiatry</i> . 2004. 16:63-72                                                                                                                   | Level 1, Form<br>Title/abstract<br>screen |
| 4208 | <b>S. Mavandadi, J. R. Klaus, D. W. Oslin.</b> Age Group Differences Among Veterans Enrolled in a Clinical Service for Behavioral Health Issues in Primary Care. <i>American Journal of Geriatric Psychiatry</i> . 2012. 20:205-214                                                                            | Level 1, Form<br>Title/abstract<br>screen |
| 4210 | <b>S. Matthews, P. Smith, P. Chadwick, V. Smyth.</b> Implementing a community-based structured exercise programme for patients with peripheral arterial disease in conjunction with an existing cardiac rehabilitation service results in better outcomes. <i>British Journal of Diabetes</i> . 2016. 16:193-+ | Level 1, Form<br>Title/abstract<br>screen |
| 4213 | <b>J. M. Martinez-Gonzalez, N. Albein-Urios, O. Lozano-Rojas, A. Verdejo-Garcia.</b> Differential aspects of treatment dropout risk in cocaine dependent patients with and without personality disorders. <i>Adicciones</i> . 2014. 26:116-125                                                                 | Level 1, Form<br>Title/abstract<br>screen |
| 4214 | <b>K. A. Martinez, K. Resnicow, G. C. Williams, M. Silva, P. Abrahamse, D. A. Shumway, L. P. Wallner, S. J. Katz, S. T. Hawley.</b> Does physician communication style impact patient report of decision quality for breast cancer treatment?. <i>Patient Education and Counseling</i> . 2016. 99:1947-1954    | Level 1, Form<br>Title/abstract<br>screen |
| 4216 | <b>B. Marsh, M. G. Drake.</b> Outpatient Management for Acute Exacerbations of Obstructive Lung Diseases. <i>Medical Clinics of North America</i> . 2017. 101:537-+                                                                                                                                            | Level 1, Form<br>Title/abstract<br>screen |
| 4217 | <b>P. L. Marotta.</b> Childhood Adversities and Substance Misuse Among the Incarcerated: Implications for Treatment and Practice in Correctional Settings. <i>Substance Use &amp; Misuse</i> . 2017. 52:717-733                                                                                                | Level 1, Form<br>Title/abstract<br>screen |
| 4218 | <b>J. Marich.</b> What Makes a Good EMDR Therapist? Exploratory Findings From Client-Centered Inquiry. <i>Journal of Humanistic Psychology</i> . 2012. 52:401-422                                                                                                                                              | Level 2, Form<br>Full Text<br>Screening   |
| 4220 | <b>S. R. Marder.</b> Facilitating compliance with antipsychotic medication. <i>Journal of Clinical Psychiatry</i> . 1998. 59:21-25                                                                                                                                                                             | Level 1, Form<br>Title/abstract<br>screen |
| 4224 | <b>S. L. Manne, D. A. Kashy, S. Rubin, E. Hernandez, C. Bergman.</b> Therapist and Patient Perceptions of Alliance and Progress in Psychological Therapy for Women Diagnosed With Gynecological Cancers. <i>Journal of Consulting and Clinical Psychology</i> . 2012. 80:800-810                               | Level 1, Form<br>Title/abstract<br>screen |
| 4225 | <b>A. Manhapra, I. Petrakis, R. Rosenheck.</b> Three-year retention in buprenorphine treatment for opioid use disorder nationally in the Veterans Health Administration. <i>American Journal on Addictions</i> . 2017. 26:572-580                                                                              | Level 1, Form<br>Title/abstract<br>screen |
| 4227 | <b>S. M. Malone, M. Luciana, S. Wilson, J. C. Sparks, R. H. Hunt, K. M. Thomas, W. G. Iacono.</b> Adolescent Drinking and Motivated Decision-Making: A Cotwin-Control Investigation with Monozygotic Twins. <i>Behavior Genetics</i> . 2014. 44:407-418                                                        | Level 1, Form<br>Title/abstract<br>screen |
| 4231 | <b>E. Magen, H. M. DeLisser.</b> Best Practices in Relational Skills Training for Medical Trainees and Providers: An Essential Element of Addressing Adverse Childhood Experiences and Promoting Resilience. <i>Academic Pediatrics</i> . 2017. 17:S102-S107                                                   | Level 1, Form<br>Title/abstract<br>screen |
| 4232 | <b>J. MacLellan, J. Surey, I. Abubakar, H. R. Stagg, J. Mannell.</b> Using peer advocates to improve access to services among hard-to-reach populations with hepatitis C: a qualitative study of client and provider relationships. <i>Harm Reduction Journal</i> . 2017. 14:9                                 | Level 1, Form<br>Title/abstract<br>screen |

|      |                                                                                                                                                                                                                                                                                                                                                                                                           |                                           |
|------|-----------------------------------------------------------------------------------------------------------------------------------------------------------------------------------------------------------------------------------------------------------------------------------------------------------------------------------------------------------------------------------------------------------|-------------------------------------------|
| 4233 | <b>M. A. Mackintosh, L. A. Morland, B. C. Frueh, C. J. Greene, C. S. Rosen.</b> Peeking into the black box: Mechanisms of action for anger management treatment. <i>Journal of Anxiety Disorders</i> . 2014. 28:687-695                                                                                                                                                                                   | Level 1, Form<br>Title/abstract<br>screen |
| 4235 | <b>S. J. Mackain, L. Lecci.</b> Perceived coercion in substance abuse treatment: The eye of the beholder?. <i>Journal of Substance Use</i> . 2010. 15:24-30                                                                                                                                                                                                                                               | Level 1, Form<br>Title/abstract<br>screen |
| 4237 | <b>Y. C. Lou, H. F. Lin.</b> Estimate of global research trends and performance in family therapy in Social Science Citation Index. <i>Scientometrics</i> . 2012. 90:807-823                                                                                                                                                                                                                              | Level 1, Form<br>Title/abstract<br>screen |
| 4243 | <b>C. Lions, M. P. Carrieri, L. Michel, M. Mora, F. Marcellin, A. Morel, B. Spire, P. Roux, Grp Methaville Study.</b> Predictors of non-prescribed opioid use after one year of methadone treatment: An attributable-risk approach (ANRS-Methaville trial). <i>Drug and Alcohol Dependence</i> . 2014. 135:1-8                                                                                            | Level 2, Form<br>Full Text<br>Screening   |
| 4244 | <b>W. R. Lindsay, L. Murphy, G. Smith, D. Murphy, Z. Edwards, C. Chittock, A. Grieve, S. J. Young.</b> The dynamic risk assessment and management system: An assessment of immediate risk of violence for individuals with offending and challenging behaviour. <i>Journal of Applied Research in Intellectual Disabilities</i> . 2004. 17:267-274                                                        | Level 1, Form<br>Title/abstract<br>screen |
| 4247 | <b>J. M. Liebschutz, Z. M. Xuan, C. W. Shanahan, M. LaRochelle, J. Keosaian, D. Beers, G. Guara, K. O'Connor, D. P. Alford, V. Parker, R. D. Weiss, J. H. Samet, J. Crosson, P. A. Cushman, K. E. Lasser.</b> Improving Adherence to Long-term Opioid Therapy Guidelines to Reduce Opioid Misuse in Primary Care A Cluster-Randomized Clinical Trial. <i>Jama Internal Medicine</i> . 2017. 177:1265-1272 | Level 1, Form<br>Title/abstract<br>screen |
| 4249 | <b>H. A. Liddle.</b> CONCEPTUAL AND CLINICAL DIMENSIONS OF A MULTIDIMENSIONAL, MULTISYSTEMS ENGAGEMENT STRATEGY IN FAMILY-BASED ADOLESCENT TREATMENT. <i>Psychotherapy</i> . 1995. 32:39-58                                                                                                                                                                                                               | Level 1, Form<br>Title/abstract<br>screen |
| 4253 | <b>T. Lewinson, M. L. Thomas, S. White.</b> Traumatic Transitions Homeless Women's Narratives of Abuse, Loss, and Fear. <i>Affilia-Journal of Women and Social Work</i> . 2014. 29:192-205                                                                                                                                                                                                                | Level 1, Form<br>Title/abstract<br>screen |
| 4254 | <b>S. E. Levkoff, H. T. Chen, E. Coakley, E. C. M. Herr, D. W. Oslin, I. Katz, S. J. Bartels, J. Maxwell, E. Olsen, K. M. Miles, G. Costantino, J. H. Ware.</b> Design and sample characteristics of the PRISM-E multisite randomized trial to improve behavioral health care for the elderly. <i>Journal of Aging and Health</i> . 2004. 16:3-27                                                         | Level 1, Form<br>Title/abstract<br>screen |
| 4255 | <b>T. Levin, D. W. Kissane.</b> Psychooncology - the state of its development in 2006. <i>European Journal of Psychiatry</i> . 2006. 20:183-197                                                                                                                                                                                                                                                           | Level 1, Form<br>Title/abstract<br>screen |
| 4257 | <b>E. Lenaerts, C. Mathei, F. Matthys, D. Zeeuws, L. Pas, P. Anderson, B. Aertgeerts.</b> Continuing care for patients with alcohol use disorders: A systematic review. <i>Drug and Alcohol Dependence</i> . 2014. 135:9-21                                                                                                                                                                               | Level 2, Form<br>Full Text<br>Screening   |
| 4260 | <b>K. Lehavot, D. Ben-Zeev, R. E. Neville.</b> Ethical Considerations and Social Media: A Case of Suicidal Postings on Facebook. <i>Journal of Dual Diagnosis</i> . 2012. 8:341-346                                                                                                                                                                                                                       | Level 1, Form<br>Title/abstract<br>screen |
| 4261 | <b>S. LeGrand, S. Reif, K. Sullivan, K. Murray, M. L. Barlow, K. Whetten.</b> A Review of Recent Literature on Trauma Among Individuals Living with HIV. <i>Current Hiv/Aids Reports</i> . 2015. 12:397-405                                                                                                                                                                                               | Level 1, Form<br>Title/abstract<br>screen |
| 4262 | <b>F. Legare, M. C. Politi, R. Drolet, S. Desroches, D. Stacey, H. Bekker, Sdm-</b>                                                                                                                                                                                                                                                                                                                       | Level 1, Form                             |

|      |                                                                                                                                                                                                                                                                                         |                                     |
|------|-----------------------------------------------------------------------------------------------------------------------------------------------------------------------------------------------------------------------------------------------------------------------------------------|-------------------------------------|
|      | <b>Cpd Team.</b> Training health professionals in shared decision-making: An international environmental scan. <i>Patient Education and Counseling</i> . 2012. 88:159-169                                                                                                               | Title/abstract screen               |
| 4264 | <b>C. J. W. Ledford, J. J. Womack, H. A. Rider, A. B. Seehusen, S. J. Conner, R. A. Lauters, J. A. Hodge.</b> Unexpected Effects of a System-Distributed Mobile Application in Maternity Care: A Randomized Controlled Trial. <i>Health Education &amp; Behavior</i> . 2018. 45:323-330 | Level 1, Form Title/abstract screen |
| 4265 | <b>A. J. Lawrence, J. Luty, N. A. Bogdan, B. J. Sahakian, L. Clark.</b> Problem gamblers share deficits in impulsive decision-making with alcohol-dependent individuals. <i>Addiction</i> . 2009. 104:1006-1015                                                                         | Level 1, Form Title/abstract screen |
| 4269 | <b>D. Lamanna, V. Stergiopoulos, J. Durbin, P. O'Campo, D. Poremski, J. Tepper.</b> Promoting continuity of care for homeless adults with unmet health needs: The role of brief interventions. <i>Health &amp; Social Care in the Community</i> . 2018. 26:56-64                        | Level 1, Form Title/abstract screen |
| 4270 | <b>P. Lagisetty, K. Klasa, C. Bush, M. Heisler, V. Chopra, A. Bohnert.</b> Primary care models for treating opioid use disorders: What actually works? A systematic review. <i>Plos One</i> . 2017. 12:40                                                                               | Level 1, Form Title/abstract screen |
| 4273 | <b>C. T. LaBelle, S. C. Han, A. Bergeron, J. H. Samet.</b> Office-Based Opioid Treatment with Buprenorphine (OBOT-B): State-wide Implementation of the Massachusetts Collaborative Care Model in Community Health Centers. <i>Journal of Substance Abuse Treatment</i> . 2016. 60:6-13  | Level 1, Form Title/abstract screen |
| 4274 | <b>S. Y. Kye, K. Park.</b> Psychosocial Factors and Health Behavior among Korean Adults: A Cross-sectional Study. <i>Asian Pacific Journal of Cancer Prevention</i> . 2012. 13:49-56                                                                                                    | Level 1, Form Title/abstract screen |
| 4275 | <b>K. Kuusisto, V. Knuutila, P. Saarnio.</b> Pre-Treatment Expectations in Clients: Impact on Retention and Effectiveness in Outpatient Substance Abuse Treatment. <i>Behavioural and Cognitive Psychotherapy</i> . 2011. 39:257-271                                                    | Level 1, Form Title/abstract screen |
| 4279 | <b>A. Krupski, K. Campbell, J. M. Joesch, B. A. Lucenko, P. Roy-Byrne.</b> Impact of Access to Recovery services on alcohol/drug treatment outcomes. <i>Journal of Substance Abuse Treatment</i> . 2009. 37:435-442                                                                     | Level 1, Form Title/abstract screen |
| 4280 | <b>K. Kroenke, J. Unutzer.</b> Closing the False Divide: Sustainable Approaches to Integrating Mental Health Services into Primary Care. <i>Journal of General Internal Medicine</i> . 2017. 32:404-410                                                                                 | Level 1, Form Title/abstract screen |
| 4281 | <b>T. Krmpotich, S. Mikulich-Gilbertson, J. Sakai, L. Thompson, M. T. Banich, J. Tanabe.</b> Impaired Decision-Making, Higher Impulsivity, and Drug Severity in Substance Dependence and Pathological Gambling. <i>Journal of Addiction Medicine</i> . 2015. 9:273-280                  | Level 1, Form Title/abstract screen |
| 4285 | <b>T. L. Kramer, K. L. Drummond, G. M. Curran, J. C. Fortney.</b> Assessing Culture and Climate of Federally Qualified Health Centers: A Plan for Implementing Behavioral Health Interventions. <i>Journal of Health Care for the Poor and Underserved</i> . 2017. 28:973-987           | Level 1, Form Title/abstract screen |
| 4286 | <b>D. D. Krahn, S. J. Bartels, E. Coakley, D. W. Oslin, H. T. Chen, J. McIntyre, H. Chung, J. Maxwell, J. Ware, S. E. Levkoff.</b> PRISM-E: Comparison of integrated care and enhanced specialty referral models in depression outcomes. <i>Psychiatric Services</i> . 2006. 57:946-953 | Level 1, Form Title/abstract screen |
| 4288 | <b>A. Koski-Jannes, T. Hirschovits-Gerz, M. Pennonen.</b> Population, Professional, and Client Support for Different Models of Managing Addictive Behaviors. <i>Substance Use &amp; Misuse</i> . 2012. 47:296-308                                                                       | Level 1, Form Title/abstract screen |
| 4289 | <b>P. T. Korthuis, D. McCarty, M. Weimer, C. Bougatsos, I. Blazina, B.</b>                                                                                                                                                                                                              | Level 1, Form                       |

|      |                                                                                                                                                                                                                                                                                                             |                                     |
|------|-------------------------------------------------------------------------------------------------------------------------------------------------------------------------------------------------------------------------------------------------------------------------------------------------------------|-------------------------------------|
|      | <b>Zakher, S. Grusing, B. Devine, R. Chou.</b> Primary Care-Based Models for the Treatment of Opioid Use Disorder A Scoping Review. <i>Annals of Internal Medicine</i> . 2017. 166:268-+                                                                                                                    | Title/abstract screen               |
| 4292 | <b>C. Kong, M. Dunn, M. Parker.</b> Psychiatric Genomics and Mental Health Treatment: Setting the Ethical Agenda. <i>American Journal of Bioethics</i> . 2017. 17:3-12                                                                                                                                      | Level 1, Form Title/abstract screen |
| 4293 | <b>M. E. Kolodziej, P. M. Muchowski, N. R. Hamdi, P. Morrissette, A. J. McGowan, R. D. Weiss.</b> Adaptation of the Patient Feedback Survey at a Community Treatment Setting. <i>American Journal on Addictions</i> . 2012. 21:63-71                                                                        | Level 1, Form Title/abstract screen |
| 4294 | <b>B. Koekkoek, B. van Meijel, B. Tiemens, A. Schene, G. Hutschemaekers.</b> What makes community psychiatric nurses label non-psychotic chronic patients as 'difficult': patient, professional, treatment and social variables. <i>Social Psychiatry and Psychiatric Epidemiology</i> . 2011. 46:1045-1053 | Level 1, Form Title/abstract screen |
| 4295 | <b>K. A. Kobak, J. C. Mundt, B. Kennard.</b> Integrating technology into cognitive behavior therapy for adolescent depression: a pilot study. <i>Annals of General Psychiatry</i> . 2015. 14:10                                                                                                             | Level 1, Form Title/abstract screen |
| 4300 | <b>Y. Kishi, R. G. Kathol, D. D. McAlpine, W. H. Meller, S. W. Richards.</b> What should non-US behavioral health systems learn from the USA? US behavior health services trends in the 1980s and 1990s. <i>Psychiatry and Clinical Neurosciences</i> . 2006. 60:261-270                                    | Level 1, Form Title/abstract screen |
| 4302 | <b>R. King, T. O'Brien, S. G. Giacomantonio.</b> Psychoanalytic perspectives on substance use and antisocial personality disorder. <i>Australian Psychologist</i> . 2005. 40:137-145                                                                                                                        | Level 1, Form Title/abstract screen |
| 4310 | <b>M. S. Kendra, J. J. Mohr, J. W. Pollard.</b> The Stigma of Having Psychological Problems: Relations With Engagement, Working Alliance, and Depression in Psychotherapy. <i>Psychotherapy</i> . 2014. 51:563-573                                                                                          | Level 1, Form Title/abstract screen |
| 4311 | <b>P. C. Kendall, T. H. Ollendick.</b> Setting the research and practice agenda for anxiety in children and adolescence: A topic comes of age. <i>Cognitive and Behavioral Practice</i> . 2004. 11:65-74                                                                                                    | Level 1, Form Title/abstract screen |
| 4317 | <b>E. C. Katz, B. S. Brown, R. P. Schwartz, K. E. O'Grady, S. D. King, D. Gandhi.</b> Transitioning opioid-dependent patients from detoxification to long-term treatment: Efficacy of intensive role induction. <i>Drug and Alcohol Dependence</i> . 2011. 117:24-30                                        | Level 1, Form Title/abstract screen |
| 4318 | <b>W. J. Katon, A. Unutzer, G. Simon.</b> Treatment of depression in primary care - Where we are, where we can go. <i>Medical Care</i> . 2004. 42:1153-1157                                                                                                                                                 | Level 1, Form Title/abstract screen |
| 4319 | <b>N. J. Kaslow, S. Kapoor, S. E. Dunn, C. C. Graves.</b> Psychologists' Contributions to Patient-Centered Medical Homes. <i>Journal of Clinical Psychology in Medical Settings</i> . 2015. 22:199-212                                                                                                      | Level 1, Form Title/abstract screen |
| 4326 | <b>N. Jordan, M. W. Sohn, B. Bartle, M. Valenstein, Y. Lee, T. A. Lee.</b> Association Between Chronic Illness Complexity and Receipt of Evidence-based Depression Care. <i>Medical Care</i> . 2014. 52:S126-S131                                                                                           | Level 1, Form Title/abstract screen |
| 4331 | <b>A. W. Jones.</b> The impact of Alcohol and Alcoholism among substance abuse journals. <i>Alcohol and Alcoholism</i> . 1999. 34:25-34                                                                                                                                                                     | Level 1, Form Title/abstract screen |
| 4333 | <b>J. Johnson, M. L. Williams.</b> A PRELIMINARY ETHNOGRAPHIC DECISION TREE MODEL OF INJECTION-DRUG USERS (IDUS) NEEDLE SHARING. <i>International Journal of the Addictions</i> . 1993. 28:997-1014                                                                                                         | Level 1, Form Title/abstract screen |

|      |                                                                                                                                                                                                                                                                                                                                     |                                     |
|------|-------------------------------------------------------------------------------------------------------------------------------------------------------------------------------------------------------------------------------------------------------------------------------------------------------------------------------------|-------------------------------------|
| 4336 | <b>G. W. Joe, K. M. Broome, D. D. Simpson, G. A. Rowan-Szal.</b> Counselor perceptions of organizational factors and innovations training experiences. <i>Journal of Substance Abuse Treatment</i> . 2007. 33:171-182                                                                                                               | Level 1, Form Title/abstract screen |
| 4337 | <b>M. C. Jhandler, W. H. Mason.</b> SOLUTION-FOCUSED THERAPY - AN ALTERNATIVE APPROACH TO ADDICTIONS NURSING. <i>Perspectives in Psychiatric Care</i> . 1995. 31:8-13                                                                                                                                                               | Level 2, Form Full Text Screening   |
| 4340 | <b>B. T. Jensen, S. V. Lauridsen, J. B. Jensen.</b> Prehabilitation for major abdominal urologic oncology surgery. <i>Current Opinion in Urology</i> . 2018. 28:243-250                                                                                                                                                             | Level 1, Form Title/abstract screen |
| 4341 | <b>M. Jansen, Mmem van Doorn, A. Lichtwarek-Aschoff, RcwM Kuijpers, H. Theunissen, M. Korte, J. van Rossum, A. Wauben, I. Granic.</b> Effectiveness of a cognitive-behavioral therapy (CBT) manualized program for clinically anxious children: study protocol of a randomized controlled trial. <i>Bmc Psychiatry</i> . 2012. 12:9 | Level 1, Form Title/abstract screen |
| 4343 | <b>S. M. Jack, M. Ford-Gilboe, D. Davidov, H. L. MacMillan, Nfp Ipv Res Team.</b> Identification and assessment of intimate partner violence in nurse home visitation. <i>Journal of Clinical Nursing</i> . 2017. 26:2215-2228                                                                                                      | Level 1, Form Title/abstract screen |
| 4345 | <b>L. Iozzino, C. Ferrari, M. Large, O. Nielsen, G. de Girolamo.</b> Prevalence and Risk Factors of Violence by Psychiatric Acute Inpatients: A Systematic Review and Meta-Analysis. <i>Plos One</i> . 2015. 10:18                                                                                                                  | Level 1, Form Title/abstract screen |
| 4350 | <b>K. Humphreys, J. C. Blodgett, T. H. Wagner.</b> Estimating the Efficacy of Alcoholics Anonymous without Self-Selection Bias: An Instrumental Variables Re-Analysis of Randomized Clinical Trials. <i>Alcoholism-Clinical and Experimental Research</i> . 2014. 38:2688-2694                                                      | Level 1, Form Title/abstract screen |
| 4351 | <b>D. Hui, Z. M. Weinstein, D. M. Cheng, E. Quinn, H. Kim, C. Labelle, J. H. Samet.</b> Very early disengagement and subsequent re-engagement in primary care Office Based Opioid Treatment (OBOT) with buprenorphine. <i>Journal of Substance Abuse Treatment</i> . 2017. 79:12-19                                                 | Level 1, Form Title/abstract screen |
| 4353 | <b>H. Huang, Y. F. Chan, A. M. Bauer, J. Suzuki, W. Katon, J. Russo, D. Hogan, J. Unutzer.</b> Specialty Behavioral Health Service Use Among Chronically Ill Medicare Advantage Patients With Substance Use Problems. <i>Psychosomatics</i> . 2013. 54:546-551                                                                      | Level 1, Form Title/abstract screen |
| 4357 | <b>S. Hornberger, S. L. Smith.</b> Family involvement in adolescent substance abuse treatment and recovery: What do we know? What lies ahead?. <i>Children and Youth Services Review</i> . 2011. 33:S70-S76                                                                                                                         | Level 2, Form Full Text Screening   |
| 4358 | <b>C. M. Horgan, D. W. Garnick, E. L. Merrick, A. Hoyt.</b> Health plan requirements for mental health and substance use screening in primary care. <i>Journal of General Internal Medicine</i> . 2007. 22:930-936                                                                                                                  | Level 1, Form Title/abstract screen |
| 4362 | <b>H. Hohenberger, K. Delahanty.</b> Patient-Centered Care-Enhanced Recovery After Surgery and Population Health Management. <i>Aorn Journal</i> . 2015. 102:578-583                                                                                                                                                                | Level 1, Form Title/abstract screen |
| 4364 | <b>A. Hogue, E. Lichvar, M. Bobek.</b> Pilot Evaluation of the Medication Integration Protocol for Adolescents With ADHD in Behavioral Care: Treatment Fidelity and Medication Uptake. <i>Journal of Emotional and Behavioral Disorders</i> . 2016. 24:223-234                                                                      | Level 1, Form Title/abstract screen |
| 4376 | <b>J. Hetteema, J. Steele, W. R. Miller.</b> Motivational interviewing. <i>Annual Review of Clinical Psychology</i> . 2005. 1:91-111                                                                                                                                                                                                | Level 1, Form Title/abstract screen |
| 4377 | <b>K. A. Hepner, M. Rowe, K. Rost, S. C. Hickey, C. D. Sherbourne, D. E.</b>                                                                                                                                                                                                                                                        | Level 1, Form                       |

|      |                                                                                                                                                                                                                                                                                    |                                     |
|------|------------------------------------------------------------------------------------------------------------------------------------------------------------------------------------------------------------------------------------------------------------------------------------|-------------------------------------|
|      | <b>Ford, L. S. Meredith, L. V. Rubenstein.</b> The effect of adherence to practice guidelines on depression outcomes. <i>Annals of Internal Medicine</i> . 2007. 147:320-329                                                                                                       | Title/abstract screen               |
| 4378 | <b>P. Hemming, A. Hewitt, J. J. Gallo, R. Kessler, R. B. Levine.</b> Residents' Confidence Providing Primary Care With Behavioral Health Integration. <i>Family Medicine</i> . 2017. 49:361-368                                                                                    | Level 1, Form Title/abstract screen |
| 4380 | <b>C. J. Heckman, F. Zhu, S. L. Manne, J. D. Kloss, B. N. Collins, S. B. Bass, S. R. Lessin.</b> Process and outcomes of a skin protection intervention for young adults. <i>Journal of Health Psychology</i> . 2013. 18:561-573                                                   | Level 1, Form Title/abstract screen |
| 4381 | <b>C. L. Haynes, G. A. Cook.</b> Audit of health promotion practice within a UK hospital: results of a pilot study. <i>Journal of Evaluation in Clinical Practice</i> . 2008. 14:103-109                                                                                           | Level 1, Form Title/abstract screen |
| 4382 | <b>E. J. Hawkins, C. A. Malte, J. S. Baer, D. R. Kivlahan.</b> Prevalence, predictors, and service utilization of patients with recurrent use of Veterans Affairs substance use disorder specialty care. <i>Journal of Substance Abuse Treatment</i> . 2012. 43:221-230            | Level 1, Form Title/abstract screen |
| 4383 | <b>E. J. Hawkins, C. A. Malte.</b> Prioritizing the reach and patient-centeredness of substance use-related care. <i>American Journal of Drug and Alcohol Abuse</i> . 2016. 42:245-249                                                                                             | Level 1, Form Title/abstract screen |
| 4385 | <b>E. J. Hawkins, J. S. Baer, D. R. Kivlahan.</b> Concurrent monitoring of psychological distress and satisfaction measures as predictors of addiction treatment retention. <i>Journal of Substance Abuse Treatment</i> . 2008. 35:207-216                                         | Level 1, Form Title/abstract screen |
| 4387 | <b>B. Hartzler, B. Beadnell, D. Donovan.</b> Predictive Validity of Addiction Treatment Clinicians' Post-Training Contingency Management Skills for Subsequent Clinical Outcomes. <i>Journal of Substance Abuse Treatment</i> . 2017. 72:126-133                                   | Level 1, Form Title/abstract screen |
| 4388 | <b>G. H. Harris, S. M. Strauss, C. Katigbak, B. S. Brar, L. S. Brown, S. S. Kipnis, S. A. Kritiz, M. W. Parrino.</b> Variation among state-level approaches to addressing alcohol abuse in opioid treatment programs. <i>Journal of Substance Abuse Treatment</i> . 2010. 39:58-64 | Level 1, Form Title/abstract screen |
| 4393 | <b>K. P. Haggerty, S. E. Barkan, M. L. Skinner, W. Ben Packard, J. J. Cole.</b> Feasibility of Connecting, a Substance-Abuse Prevention Program for Foster Teens and their Caregivers. <i>Journal of the Society for Social Work and Research</i> . 2016. 7:639-659                | Level 1, Form Title/abstract screen |
| 4394 | <b>J. Haggarty, B. O'Connor, S. Dubois, A. M. Blackadar, T. McKinnon, D. Boudreau, D. Haslam.</b> A pilot study of a Canadian shared mental health care programme: Changes in patient symptoms and disability. <i>Primary Care &amp; Community Psychiatry</i> . 2008. 13:27-35     | Level 1, Form Title/abstract screen |
| 4395 | <b>S. E. Hadland, J. F. Wharam, M. A. Schuster, F. Zhang, J. H. Samet, M. R. Laroche.</b> Trends in Receipt of Buprenorphine and Naltrexone for Opioid Use Disorder Among Adolescents and Young Adults, 2001-2014. <i>Jama Pediatrics</i> . 2017. 171:747-755                      | Level 1, Form Title/abstract screen |
| 4396 | <b>F. Haarig, S. Muhlig.</b> Conjoint Analysis for Measuring Treatment Preferences of Patients With Psychiatric Disorders: A Systematic Literature Review. <i>Zeitschrift Fur Klinische Psychologie Und Psychotherapie</i> . 2015. 44:1-16                                         | Level 1, Form Title/abstract screen |
| 4397 | <b>B. L. N. Gutierrez, F. F. Palacios.</b> A search for a different world. Social representation that determines decision-making 26 by Mexican adolescent user of illegal drugs. <i>Salud Mental</i> . 2004. 27:26-34                                                              | Level 1, Form Title/abstract screen |
| 4399 | <b>R. Gueorguieva, R. Wu, J. H. Krystal, D. Donovan, S. S. O'Malley.</b>                                                                                                                                                                                                           | Level 1, Form                       |

|      |                                                                                                                                                                                                                                                                                                                                                   |                                     |
|------|---------------------------------------------------------------------------------------------------------------------------------------------------------------------------------------------------------------------------------------------------------------------------------------------------------------------------------------------------|-------------------------------------|
|      | Temporal patterns of adherence to medications and behavioral treatment and their relationship to patient characteristics and treatment response. <i>Addictive Behaviors</i> . 2013. 38:2119-2127                                                                                                                                                  | Title/abstract screen               |
| 4403 | <b>K. A. Greiner.</b> THE ETHICS OF USING ALTERNATIVE THERAPIES IN HIV AIDS. <i>Aids Patient Care</i> . 1995. 9:175-181                                                                                                                                                                                                                           | Level 1, Form Title/abstract screen |
| 4404 | <b>S. F. Greenfield, D. E. Sugarman, C. M. Freid, G. L. Bailey, M. A. Crisafulli, J. S. Kaufman, S. Wigderson, H. S. Connery, J. Rodolico, A. A. Morgan-Lopez, G. M. Fitzmaurice.</b> Group therapy for women with substance use disorders: Results from the Women's Recovery Group Study. <i>Drug and Alcohol Dependence</i> . 2014. 142:245-253 | Level 1, Form Title/abstract screen |
| 4405 | <b>T. C. Green, J. Johnson, M. Harrington, E. R. Pouget, A. G. Rhodes, F. S. Taxman, D. J. O'Connell, S. S. Martin, M. Prendergast, P. D. Friedmann.</b> Parole Officer-parolee Relationships and HIV Risk Behaviors during Community Supervision. <i>Aids and Behavior</i> . 2013. 17:2667-2675                                                  | Level 1, Form Title/abstract screen |
| 4408 | <b>D. B. Green, B. B. Pua, C. B. Crawford, G. N. Abbey, I. R. Drexler, A. C. Legasto, J. F. Gruden.</b> Screening for Lung Cancer: Communicating With Patients. <i>American Journal of Roentgenology</i> . 2018. 210:497-502                                                                                                                      | Level 1, Form Title/abstract screen |
| 4412 | <b>L. Grabbe, A. F. Amar, U. A. Kelly.</b> The Triad of Childhood Trauma, Mental Illness, and Substance Abuse: Applying Trauma-Informed Care. <i>Journal of the American Psychiatric Nurses Association</i> . 2014. 20:65-65                                                                                                                      | Level 1, Form Title/abstract screen |
| 4413 | <b>A. Gorini, C. Lucchiari, W. Russell-Edu, G. Pravettoni.</b> Modulation of risky choices in recently abstinent dependent cocaine users: a transcranial direct-current stimulation study. <i>Frontiers in Human Neuroscience</i> . 2014. 8:9                                                                                                     | Level 1, Form Title/abstract screen |
| 4418 | <b>D. J. Goldsmith, K. A. Lindholm, J. J. Bute.</b> Dilemmas of talking about lifestyle changes among couples coping with a cardiac event. <i>Social Science &amp; Medicine</i> . 2006. 63:2079-2090                                                                                                                                              | Level 1, Form Title/abstract screen |
| 4420 | <b>S. B. Goldberg, A. C. Del Re, W. T. Hoyt, J. M. Davis.</b> The Secret Ingredient in Mindfulness Interventions? A Case for Practice Quality Over Quantity. <i>Journal of Counseling Psychology</i> . 2014. 61:491-497                                                                                                                           | Level 1, Form Title/abstract screen |
| 4423 | <b>K. Giyaur, J. Sharf, M. J. Hilsenroth.</b> The capacity for dynamic process scale (CDPS) and patient engagement in opiate addiction treatment. <i>Journal of Nervous and Mental Disease</i> . 2005. 193:833-838                                                                                                                                | Level 1, Form Title/abstract screen |
| 4425 | <b>J. M. Girard, A. G. C. Wright, J. E. Beeney, S. A. Lazarus, L. N. Scott, S. D. Stepp, P. A. Pilkonis.</b> Interpersonal problems across levels of the psychopathology hierarchy. <i>Comprehensive Psychiatry</i> . 2017. 79:53-69                                                                                                              | Level 1, Form Title/abstract screen |
| 4431 | <b>E. V. Gifford.</b> Commentary on Cunningham et al. (2012): Benefit to clients - outcome monitoring and knowledge translation. <i>Addiction</i> . 2012. 107:1525-1526                                                                                                                                                                           | Level 1, Form Title/abstract screen |
| 4432 | <b>L. G. Gidding, M. G. Spigt, G. J. Dinant.</b> Patients with psychological ICPC codes in primary care; a case-control study investigating the decade before presenting with problems. <i>European Journal of General Practice</i> . 2017. 23:217-224                                                                                            | Level 1, Form Title/abstract screen |
| 4433 | <b>C. A. Gibson.</b> Review of posttraumatic stress disorder and chronic pain: The path to integrated care. <i>Journal of Rehabilitation Research and Development</i> . 2012. 49:753-776                                                                                                                                                          | Level 1, Form Title/abstract screen |
| 4434 | <b>S. W. Gibbons, L. Migliore, S. P. Convoy, S. Greiner, P. H. DeLeon.</b> Military Mental Health Stigma Challenges: Policy and Practice Consideration's. <i>Jnp-Journal for Nurse Practitioners</i> . 2014. 10:365-372                                                                                                                           | Level 1, Form Title/abstract screen |



|      |                                                                                                                                                                                                                                                                                                                                                                                                                           |                                     |
|------|---------------------------------------------------------------------------------------------------------------------------------------------------------------------------------------------------------------------------------------------------------------------------------------------------------------------------------------------------------------------------------------------------------------------------|-------------------------------------|
| 4435 | <b>C. J. Gibbons, C. Nich, K. Steinberg, R. A. Roffman, J. Corvino, T. F. Babor, K. M. Carroll.</b> Treatment process, alliance and outcome in brief versus extended treatments for marijuana dependence. <i>Addiction</i> . 2010. 105:1799-1808                                                                                                                                                                          | Level 2, Form Full Text Screening   |
| 4441 | <b>E. Gervilla, B. Cajal, A. Palmer.</b> Quantification of the influence of friends and antisocial behaviour in adolescent consumption of cannabis using the ZINB model and data mining. <i>Addictive Behaviors</i> . 2011. 36:368-374                                                                                                                                                                                    | Level 1, Form Title/abstract screen |
| 4442 | <b>M. R. Gerber, M. W. King, K. M. Iverson, S. L. Pineles, S. G. Haskell.</b> Association Between Mental Health Burden and Coronary Artery Disease in US Women Veterans Over 45: A National Cross-Sectional Study. <i>Journal of Womens Health</i> . 2018. 27:238-244                                                                                                                                                     | Level 1, Form Title/abstract screen |
| 4445 | <b>J. Gaume, N. Heather, G. Tober, J. McCambridge.</b> A Mediation Analysis of Treatment Processes in the UK Alcohol Treatment Trial. <i>Journal of Consulting and Clinical Psychology</i> . 2018. 86:321-329                                                                                                                                                                                                             | Level 1, Form Title/abstract screen |
| 4450 | <b>M. P. Garcia-Portilla, L. Garcia-Alvarez, F. Sarramea, G. Galvan, E. Diaz-Mesa, T. Bobes-Bascaran, S. Al-Halabi, E. Elizagarate, C. Iglesias, P. A. S. Martinez, J. Bobes.</b> It is feasible and effective to help patients with severe mental disorders to quit smoking: An ecological pragmatic clinical trial with transdermal nicotine patches and varenicline. <i>Schizophrenia Research</i> . 2016. 176:272-280 | Level 1, Form Title/abstract screen |
| 4452 | <b>L. Garbrick, M. A. Levitt, M. Barrett, L. Graham.</b> Agreement between emergency physicians and psychiatrists regarding admission decisions. <i>Academic Emergency Medicine</i> . 1996. 3:1027-1030                                                                                                                                                                                                                   | Level 1, Form Title/abstract screen |
| 4454 | <b>C. Galandra, G. Basso, S. Cappa, N. Canessa.</b> The alcoholic brain: neural bases of impaired reward-based decision-making in alcohol use disorders. <i>Neurological Sciences</i> . 2018. 39:423-435                                                                                                                                                                                                                  | Level 1, Form Title/abstract screen |
| 4455 | <b>J. S. Funderburk, D. E. Sugarman, A. K. Labbe, A. Rodrigues, S. A. Maisto, B. Nelson.</b> Behavioral Health Interventions Being Implemented in a VA Primary Care System. <i>Journal of Clinical Psychology in Medical Settings</i> . 2011. 18:22-29                                                                                                                                                                    | Level 1, Form Title/abstract screen |
| 4456 | <b>R. Fuchs-Strizek, T. Berger.</b> Psychocardiology in inpatient rehabilitation. <i>Wiener Medizinische Wochenschrift</i> . 2018. 168:31-38                                                                                                                                                                                                                                                                              | Level 1, Form Title/abstract screen |
| 4461 | <b>R. C. Freeman, G. M. Rodriguez, J. F. French.</b> Compliance with AZT treatment regimen of HIV-seropositive injection drug users: A neglected issue. <i>Aids Education and Prevention</i> . 1996. 8:58-71                                                                                                                                                                                                              | Level 1, Form Title/abstract screen |
| 4470 | <b>M. I. Fontao, C. Massau, K. Hoffmann, T. Ross.</b> Therapeutic Alliance and Therapeutic Processes in a Group Therapy with Substance Addicted Offenders. <i>Gruppenpsychotherapie Und Gruppendynamik</i> . 2012. 48:173-197                                                                                                                                                                                             | Level 1, Form Title/abstract screen |
| 4471 | <b>C. A. Fontanella, D. L. Hiance-Steelesmith, R. Gilchrist, J. A. Bridge, D. Weston, J. V. Campo.</b> Quality of Care for Medicaid-Enrolled Youth with Bipolar Disorders. <i>Administration and Policy in Mental Health and Mental Health Services Research</i> . 2015. 42:126-138                                                                                                                                       | Level 1, Form Title/abstract screen |
| 4472 | <b>S. A. Flocke, E. Antognoli, M. M. Step, S. Marsh, T. Parran, M. J. Mason.</b> A teachable moment communication process for smoking cessation talk: description of a group randomized clinician-focused intervention. <i>Bmc Health Services Research</i> . 2012. 12:13                                                                                                                                                 | Level 1, Form Title/abstract screen |
| 4475 | <b>J. Finke.</b> PATIENTS EXPECTATIONS CONCERNING PSYCHOTHERAPY IN A PSYCHIATRIC-HOSPITAL - AN EMPIRICAL-INVESTIGATION. <i>Psychiatrische Praxis</i> . 1995. 22:112-116                                                                                                                                                                                                                                                   | Level 1, Form Title/abstract screen |

|      |                                                                                                                                                                                                                                                                                                                                            |                                           |
|------|--------------------------------------------------------------------------------------------------------------------------------------------------------------------------------------------------------------------------------------------------------------------------------------------------------------------------------------------|-------------------------------------------|
| 4476 | <b>C. Field, R. Caetano.</b> The Role of Ethnic Matching Between Patient and Provider on the Effectiveness of Brief Alcohol Interventions With Hispanics. <i>Alcoholism-Clinical and Experimental Research</i> . 2010. 34:262-271                                                                                                          | Level 1, Form<br>Title/abstract<br>screen |
| 4481 | <b>S. B. Fawcett, A. PaineAndrews, V. T. Francisco, J. A. Schultz, K. P. Richter, R. K. Lewis, E. L. Williams, K. J. Harris, J. Y. Berkley, J. L. Fisher, C. M. Lopez.</b> Using empowerment theory in collaborative partnerships for community health and development. <i>American Journal of Community Psychology</i> . 1995. 23:677-697 | Level 1, Form<br>Title/abstract<br>screen |
| 4484 | <b>M. Farrell, L. Gowing, J. Marsden, W. Ling, R. Ali.</b> Effectiveness of drug dependence treatment in HIV prevention. <i>International Journal of Drug Policy</i> . 2005. 16:S67-S75                                                                                                                                                    | Level 1, Form<br>Title/abstract<br>screen |
| 4485 | <b>J. R. Fann, C. H. Bombardier, J. S. Richards, C. S. Wilson, A. W. Heinemann, A. M. Warren, L. Brooks, C. B. McCullumsmith, N. R. Temkin, C. Warms, D. G. Tate, Prisms Invest.</b> Venlafaxine Extended-Release for Depression Following Spinal Cord Injury A Randomized Clinical Trial. <i>Jama Psychiatry</i> . 2015. 72:247-258       | Level 1, Form<br>Title/abstract<br>screen |
| 4487 | <b>K. M. Fairfield, H. Libman, R. B. Davis, D. M. Eisenberg, R. S. Phillips.</b> Delays in protease inhibitor use in clinical practice. <i>Journal of General Internal Medicine</i> . 1999. 14:395-401                                                                                                                                     | Level 1, Form<br>Title/abstract<br>screen |
| 4489 | <b>R. M. Etheridge, R. L. Hubbard.</b> Conceptualizing and assessing treatment structure and process in community-based drug dependency treatment programs. <i>Substance Use &amp; Misuse</i> . 2000. 35:1757-1795                                                                                                                         | Level 1, Form<br>Title/abstract<br>screen |
| 4491 | <b>S. J. Erickson, M. Gerstle, S. W. Feldstein.</b> Brief interventions and motivational interviewing with children, adolescents, and their parents in pediatric health care settings - A review. <i>Archives of Pediatrics &amp; Adolescent Medicine</i> . 2005. 159:1173-1180                                                            | Level 1, Form<br>Title/abstract<br>screen |
| 4494 | <b>B. Engle, M. J. Macgowan, E. F. Wagner, P. C. Amrhein.</b> Markers of Marijuana Use Outcomes Within Adolescent Substance Abuse Group Treatment. <i>Research on Social Work Practice</i> . 2010. 20:271-282                                                                                                                              | Level 1, Form<br>Title/abstract<br>screen |
| 4497 | <b>L. E. Egede, R. Acierno, R. G. Knapp, C. Lejuez, M. Hernandez-Tejada, E. H. Payne, B. C. Frueh.</b> Psychotherapy for depression in older veterans via telemedicine: a randomised, open-label, non-inferiority trial. <i>Lancet Psychiatry</i> . 2015. 2:693-701                                                                        | Level 1, Form<br>Title/abstract<br>screen |
| 4498 | <b>E. O. Efraimsson, B. Klang, A. Ehrenberg, K. Larsson, B. Fossum, L. Olai.</b> Nurses' and patients' communication in smoking cessation at nurse-led COPD clinics in primary health care. <i>European Clinical Respiratory Journal</i> . 2015. 2:13                                                                                      | Level 1, Form<br>Title/abstract<br>screen |
| 4500 | <b>E. J. Edelman, N. B. Hansen, C. J. Cutter, C. Danton, L. E. Fiellin, P. G. O'Connor, E. C. Williams, S. A. Maisto, K. J. Bryant, D. A. Fiellin.</b> Implementation of integrated stepped care for unhealthy alcohol use in HIV clinics. <i>Addiction Science &amp; Clinical Practice</i> . 2016. 11:14                                  | Level 1, Form<br>Title/abstract<br>screen |
| 4501 | <b>V. Dzul-Church, J. W. Cimino, S. R. Adler, P. Wong, W. G. Anderson.</b> "I'm Sitting Here By Myself ... ": Experiences of Patients with Serious Illness at an Urban Public Hospital. <i>Journal of Palliative Medicine</i> . 2010. 13:695-701                                                                                           | Level 1, Form<br>Title/abstract<br>screen |
| 4504 | <b>L. L. DuBenske, D. H. Gustafson, B. R. Shaw, J. F. Cleary.</b> Web-Based Cancer Communication and Decision Making Systems: Connecting Patients, Caregivers, and Clinicians for Improved Health Outcomes. <i>Medical Decision Making</i> . 2010. 30:732-744                                                                              | Level 1, Form<br>Title/abstract<br>screen |
| 4505 | <b>B. G. Druss, S. A. von Esenwein.</b> Improving general medical care for persons                                                                                                                                                                                                                                                         | Level 1, Form                             |

|      |                                                                                                                                                                                                                                                                                                                                             |                                     |
|------|---------------------------------------------------------------------------------------------------------------------------------------------------------------------------------------------------------------------------------------------------------------------------------------------------------------------------------------------|-------------------------------------|
|      | with mental and addictive disorders: systematic review. <i>General Hospital Psychiatry</i> . 2006. 28:145-153                                                                                                                                                                                                                               | Title/abstract screen               |
| 4507 | <b>K. H. Drieschner, S. M. M. Lammers, C. P. F. van der Staak.</b> Treatment motivation: An attempt for clarification of an ambiguous concept. <i>Clinical Psychology Review</i> . 2004. 23:1115-1137                                                                                                                                       | Level 1, Form Title/abstract screen |
| 4508 | <b>R. E. Drake, E. L. O'Neal, M. A. Wallach.</b> A systematic review of psychosocial research on psychosocial interventions for people with co-occurring severe mental and substance use disorders. <i>Journal of Substance Abuse Treatment</i> . 2008. 34:123-138                                                                          | Level 1, Form Title/abstract screen |
| 4512 | <b>D. M. Donovan, D. C. Daley, G. S. Brigham, C. C. Hodgkins, H. I. Perl, A. S. Floyd.</b> How Practice and Science Are Balanced and Blended in the NIDA Clinical Trials Network: The Bidirectional Process in the Development of the STAGE-12 Protocol as an Example. <i>American Journal of Drug and Alcohol Abuse</i> . 2011. 37:408-416 | Level 1, Form Title/abstract screen |
| 4513 | <b>J. M. Donohue, R. G. Frank.</b> Medicaid behavioral health carve-outs: A new generation of privatization decisions. <i>Harvard Review of Psychiatry</i> . 2000. 8:231-241                                                                                                                                                                | Level 1, Form Title/abstract screen |
| 4518 | <b>C. DiIorio, P. O. Shafer, R. Letz, T. R. Henry, D. L. Schomer, K. Yeager, Ease Study Grp Project.</b> Project EASE: a study to test a psychosocial model of epilepsy medication management. <i>Epilepsy &amp; Behavior</i> . 2004. 5:926-936                                                                                             | Level 1, Form Title/abstract screen |
| 4519 | <b>E. Dieperink, A. Knott, P. Thuras, C. Pocha.</b> The effect of stimulant use on antiviral treatment in an integrated hepatitis clinic. <i>General Hospital Psychiatry</i> . 2013. 35:387-392                                                                                                                                             | Level 1, Form Title/abstract screen |
| 4521 | <b>S. Dewing, C. Mathews, M. Lurie, A. Kagee, T. Padayachee, C. Lombard.</b> Predictors of poor adherence among people on antiretroviral treatment in Cape Town, South Africa: a case-control study. <i>Aids Care-Psychological and Socio-Medical Aspects of Aids/Hiv</i> . 2015. 27:342-349                                                | Level 1, Form Title/abstract screen |
| 4522 | <b>M. Devens.</b> Personality disorders. <i>Primary Care</i> . 2007. 34:623-+                                                                                                                                                                                                                                                               | Level 1, Form Title/abstract screen |
| 4524 | <b>C. B. Dennis, B. D. Roland, B. Loneck.</b> The impact of twelve-step program familiarity and its in-session discussion on counselor credibility. <i>American Journal of Drug and Alcohol Abuse</i> . 2013. 39:298-303                                                                                                                    | Level 1, Form Title/abstract screen |
| 4528 | <b>L. Del Piccolo, C. Goss.</b> People-centred care: new research needs and methods in doctor-patient communication. Challenges in mental health. <i>Epidemiology and Psychiatric Sciences</i> . 2012. 21:145-149                                                                                                                           | Level 1, Form Title/abstract screen |
| 4529 | <b>F. K. Del Boca, J. Darkes.</b> Enhancing the validity and utility of randomized clinical trials in addictions treatment research: I. Treatment implementation and research design. <i>Addiction</i> . 2007. 102:1047-1056                                                                                                                | Level 1, Form Title/abstract screen |
| 4533 | <b>L. de Visser, L. J. van der Knaap, Ajae van de Loo, C. M. M. van der Weerd, F. Ohl, R. van den Bos.</b> Trait anxiety affects decision-making differently in healthy men and women: Towards gender-specific endophenotypes of anxiety. <i>Neuropsychologia</i> . 2010. 48:1598-1606                                                      | Level 1, Form Title/abstract screen |
| 4534 | <b>H. A. de Haan, E. A. G. Joosten, A. G. M. Wijdeveld, P. B. Boswinkel, J. van der Palen, C. A. J. De Jong.</b> Cognitive Behavioural Treatment Is as Effective in High- as in Low-Scoring Alexithymic Patients with Substance-Related Disorders. <i>Psychotherapy and Psychosomatics</i> . 2011. 80:254-255                               | Level 1, Form Title/abstract screen |
| 4537 | <b>D. Davis, M. Hawk, D. Winkler.</b> Because the clients told us so. <i>Housing Care and Support</i> . 2017. 20:164-174                                                                                                                                                                                                                    | Level 1, Form Title/abstract        |

|      |                                                                                                                                                                                                                                                                                                                                                                                                                                                                                          |                                           |
|------|------------------------------------------------------------------------------------------------------------------------------------------------------------------------------------------------------------------------------------------------------------------------------------------------------------------------------------------------------------------------------------------------------------------------------------------------------------------------------------------|-------------------------------------------|
|      |                                                                                                                                                                                                                                                                                                                                                                                                                                                                                          | screen                                    |
| 4538 | <b>M. J. Davies, S. Heller, T. C. Skinner, M. J. Campbell, M. E. Carey, S. Cradock, H. M. Dallosso, H. Daly, Y. Doherty, S. Eaton, C. Fox, L. Oliver, K. Rantell, G. Rayman, K. Khunti, Ongoin Diabet Educ Self Management.</b> Effectiveness of the diabetes education and self management for ongoing and newly diagnosed (DESMOND) programme for people with newly diagnosed type 2 diabetes: cluster randomised controlled trial. <i>British Medical Journal</i> . 2008. 336:491-495 | Level 1, Form<br>Title/abstract<br>screen |
| 4542 | <b>G. d'Ettorre, V. Pellicani.</b> Workplace Violence Toward Mental Healthcare Workers Employed in Psychiatric Wards. <i>Safety and Health at Work</i> . 2017. 8:337-342                                                                                                                                                                                                                                                                                                                 | Level 1, Form<br>Title/abstract<br>screen |
| 4544 | <b>W. D'Andrea, L. Bergholz, A. Fortunato, J. Spinazzola.</b> Play to the Whistle: A Pilot Investigation of a Sports-Based Intervention for Traumatized Girls in Residential Treatment. <i>Journal of Family Violence</i> . 2013. 28:739-749                                                                                                                                                                                                                                             | Level 1, Form<br>Title/abstract<br>screen |
| 4545 | <b>P. Czobor, R. A. Van Dorn, L. Citrome, R. S. Kahn, W. W. Fleischhacker, J. Volavka.</b> Treatment adherence in schizophrenia: A patient-level meta-analysis of combined CATIE and EUFEST studies. <i>European Neuropsychopharmacology</i> . 2015. 25:1158-1166                                                                                                                                                                                                                        | Level 1, Form<br>Title/abstract<br>screen |
| 4546 | <b>P. A. Cushman, J. M. Liebschutz, B. J. Anderson, M. R. Moreau, M. D. Stein.</b> Buprenorphine Initiation and Linkage to Outpatient Buprenorphine do not Reduce Frequency of Injection Opiate Use Following Hospitalization. <i>Journal of Substance Abuse Treatment</i> . 2016. 68:68-73                                                                                                                                                                                              | Level 1, Form<br>Title/abstract<br>screen |
| 4548 | <b>L. Culpepper.</b> Primary care treatment of attention-deficit/hyperactivity disorder. <i>Journal of Clinical Psychiatry</i> . 2006. 67:51-58                                                                                                                                                                                                                                                                                                                                          | Level 1, Form<br>Title/abstract<br>screen |
| 4549 | <b>R. A. Crowley, N. Kirschner, Phys Amer Coll.</b> The Integration of Care for Mental Health, Substance Abuse, and Other Behavioral Health Conditions into Primary Care: Executive Summary of an American College of Physicians Position Paper. <i>Annals of Internal Medicine</i> . 2015. 163:298-+                                                                                                                                                                                    | Level 1, Form<br>Title/abstract<br>screen |
| 4550 | <b>P. CritsChristoph, L. Siqueland, J. Blaine, A. Frank, L. Luborsky, L. S. Onken, L. Muenz, M. E. Thase, R. D. Weiss, D. R. Gastfriend, G. Woody, J. P. Barber, S. F. Butler, D. Daley, S. Bishop, L. M. Najavits, J. Lis, D. Mercer, M. L. Griffin, K. Moras, A. T. Beck.</b> The National Institute on Drug Abuse Collaborative Cocaine Treatment Study - Rationale and methods. <i>Archives of General Psychiatry</i> . 1997. 54:721-726                                             | Level 1, Form<br>Title/abstract<br>screen |
| 4555 | <b>P. Crits-Christoph, J. E. Johnson, M. B. C. Gibbons, R. Gallop.</b> Process Predictors of the Outcome of Group Drug Counseling. <i>Journal of Consulting and Clinical Psychology</i> . 2013. 81:23-34                                                                                                                                                                                                                                                                                 | Level 1, Form<br>Title/abstract<br>screen |
| 4559 | <b>H. M. Crane, W. Lober, E. Webster, R. D. Harrington, P. K. Crane, T. E. Davis, M. M. Kitahata.</b> Routine collection of patient-reported outcomes in an HIV clinic setting: The first 100 patients. <i>Current Hiv Research</i> . 2007. 5:109-118                                                                                                                                                                                                                                    | Level 1, Form<br>Title/abstract<br>screen |
| 4566 | <b>S. S. Coughlin, J. J. Prochaska, L. B. Williams, G. M. Besenyi, V. Heboyan, D. S. Goggans, W. Yoo, G. De Leo.</b> Patient web portals, disease management, and primary prevention. <i>Risk Management and Healthcare Policy</i> . 2017. 10:33-40                                                                                                                                                                                                                                      | Level 1, Form<br>Title/abstract<br>screen |
| 4568 | <b>C. U. Correll, L. Citrome, P. M. Haddad, J. Lauriello, M. Olfson, S. M. Calloway, J. M. Kane.</b> The Use of Long-Acting Injectable Antipsychotics in Schizophrenia: Evaluating the Evidence. <i>Journal of Clinical Psychiatry</i> . 2016. 77:3-+                                                                                                                                                                                                                                    | Level 1, Form<br>Title/abstract<br>screen |

|      |                                                                                                                                                                                                                                                                                                                                      |                                           |
|------|--------------------------------------------------------------------------------------------------------------------------------------------------------------------------------------------------------------------------------------------------------------------------------------------------------------------------------------|-------------------------------------------|
| 4570 | <b>L. A. Copeland, A. L. Miller, D. E. Welsh, J. F. McCarthy, J. E. Zeber, A. M. Kilbourne.</b> Clinical and Demographic Factors Associated With Homelessness and Incarceration Among VA Patients With Bipolar Disorder. <i>American Journal of Public Health</i> . 2009. 99:871-877                                                 | Level 1, Form<br>Title/abstract<br>screen |
| 4575 | <b>J. M. Clem, T. E. Smith, K. V. Richards.</b> Effects of a Low-Element Challenge Course on Abstinence Self-Efficacy and Group Cohesion. <i>Research on Social Work Practice</i> . 2012. 22:151-158                                                                                                                                 | Level 1, Form<br>Title/abstract<br>screen |
| 4577 | <b>K. Clarke, E. Mayo-Wilson, J. Kenny, S. Pilling.</b> Can non-pharmacological interventions prevent relapse in adults who have recovered from depression? A systematic review and meta-analysis of randomised controlled trials. <i>Clinical Psychology Review</i> . 2015. 39:58-70                                                | Level 1, Form<br>Title/abstract<br>screen |
| 4581 | <b>B. Cichocki.</b> The alliance in psychiatric rehabilitation: Client characteristics associated with the initial alliance in a supported employment program. <i>Work-a Journal of Prevention Assessment &amp; Rehabilitation</i> . 2015. 52:811-824                                                                                | Level 1, Form<br>Title/abstract<br>screen |
| 4586 | <b>T. Cho, M. Toritsuka, Y. Saka, M. Morikawa, T. Kishimoto.</b> COLLABORATIVE MEDICAL CARE OF ALCOHOL USE DISORDER. <i>Alcohol and Alcoholism</i> . 2014. 49:1                                                                                                                                                                      | Level 1, Form<br>Title/abstract<br>screen |
| 4587 | <b>T. Cho, M. Toritsuka, A. Ino, Y. Saka, M. Harada, T. Kishimoto.</b> COLLABORATIVE MEDICAL CARE FOR ALCOHOL DEPENDENCE FILL THE GAPS. <i>Alcoholism-Clinical and Experimental Research</i> . 2014. 38:69A-69A                                                                                                                      | Level 1, Form<br>Title/abstract<br>screen |
| 4588 | <b>M. Y. L. Chiu, W. W. N. Ho, W. T. L. Lo, M. G. C. Yiu.</b> Operationalization of the SAMHSA model of recovery: a quality of life perspective. <i>Quality of Life Research</i> . 2010. 19:1-13                                                                                                                                     | Level 1, Form<br>Title/abstract<br>screen |
| 4590 | <b>T. C. Cheng, C. C. Lo.</b> A Longitudinal Causal Analysis of Impact Made by Collaborative Engagement and Service Receipt on Likelihood of Substantiated Re-Report. <i>Child Maltreatment</i> . 2015. 20:258-267                                                                                                                   | Level 1, Form<br>Title/abstract<br>screen |
| 4591 | <b>Y. F. Chen, J. Madan, N. Welton, I. Yahaya, P. Aveyard, L. Bauld, D. Wang, A. Fry-Smith, M. R. Munafo.</b> Effectiveness and cost-effectiveness of computer and other electronic aids for smoking cessation: a systematic review and network meta-analysis. <i>Health Technology Assessment</i> . 2012. 16:1-+                    | Level 1, Form<br>Title/abstract<br>screen |
| 4592 | <b>J. J. Chen, T. A. Caller, J. N. Mecchella, D. S. Thakur, K. Homa, C. T. Finn, E. J. Kobylarz, K. A. Bujarski, V. M. Thadani, B. C. Jobst.</b> Reducing severity of comorbid psychiatric symptoms in an epilepsy clinic using a colocation model: Results of a pilot intervention. <i>Epilepsy &amp; Behavior</i> . 2014. 39:92-96 | Level 1, Form<br>Title/abstract<br>screen |
| 4594 | <b>J. Charlton, A. Albanese, L. Brodie.</b> The challenges of type 1 diabetes and new psychoactive substance misuse. <i>Practical Diabetes</i> . 2018. 35:81-+                                                                                                                                                                       | Level 1, Form<br>Title/abstract<br>screen |
| 4598 | <b>D. Casey.</b> Nurses' perceptions, understanding and experiences of health promotion. <i>Journal of Clinical Nursing</i> . 2007. 16:1039-1049                                                                                                                                                                                     | Level 1, Form<br>Title/abstract<br>screen |
| 4599 | <b>J. Cartwright, M. Asbridge.</b> Passengers' Decisions to Ride With a Driver Under the Influence of Either Alcohol or Cannabis. <i>Journal of Studies on Alcohol and Drugs</i> . 2011. 72:86-95                                                                                                                                    | Level 1, Form<br>Title/abstract<br>screen |
| 4600 | <b>S. B. Carswell, M. S. Gordon, J. Gryczynski, S. A. Tangires.</b> The daily progress system: A proof of concept pilot study of a recovery support technology tool for outpatient substance abuse treatment. <i>American Journal of Drug and Alcohol Abuse</i> . 2018. 44:294-301                                                   | Level 1, Form<br>Title/abstract<br>screen |

|      |                                                                                                                                                                                                                                                                                                                         |                                           |
|------|-------------------------------------------------------------------------------------------------------------------------------------------------------------------------------------------------------------------------------------------------------------------------------------------------------------------------|-------------------------------------------|
| 4601 | <b>E. Carruzzo, G. Zimmermann, C. Zufferey, M. Monnat, A. Rougemont-Buecking, J. Besson, J. N. Despland.</b> Motivational interviewing, a new "panacea" in the treatment of substance use disorders? A review of literature. <i>Pratiques Psychologiques</i> . 2009. 15:405-413                                         | Level 1, Form<br>Title/abstract<br>screen |
| 4604 | <b>K. M. Carpenter, W. Y. Cheng, J. L. Smith, A. C. Brooks, P. C. Amrhein, R. M. Wain, E. V. Nunes.</b> "Old Dogs" and New Skills: How Clinician Characteristics Relate to Motivational Interviewing Skills Before, During, and After Training. <i>Journal of Consulting and Clinical Psychology</i> . 2012. 80:560-573 | Level 1, Form<br>Title/abstract<br>screen |
| 4605 | <b>R. M. Carney, K. E. Freedland, B. C. Steinmeyer, E. H. Rubin, G. Ewald.</b> Collaborative care for depression symptoms in an outpatient cardiology setting: A randomized clinical trial. <i>International Journal of Cardiology</i> . 2016. 219:164-171                                                              | Level 1, Form<br>Title/abstract<br>screen |
| 4607 | <b>D. Carise, O. Gurel, A. T. McLellan, K. Dugosh, C. Kendig.</b> Getting patients the services they need using a computer-assisted system for patient assessment and referral - CASPAR. <i>Drug and Alcohol Dependence</i> . 2005. 80:177-189                                                                          | Level 2, Form<br>Full Text<br>Screening   |
| 4623 | <b>R. I. Burton.</b> PRESIDENTIAL-ADDRESS - DISCOVERING THE RIGHT QUESTIONS - OUR CALL TO ACTION - WHO WILL DEFINE HEALTH-CARE RATIONING, AND HOW. <i>Journal of Hand Surgery-American Volume</i> . 1994. 19A:169-180                                                                                                   | Level 1, Form<br>Title/abstract<br>screen |
| 4624 | <b>M. R. Burt, A. E. Duke, W. A. Hargreaves.</b> The program environment scale: Assessing client perceptions of community-based programs for the severely mentally ill. <i>American Journal of Community Psychology</i> . 1998. 26:853-879                                                                              | Level 1, Form<br>Title/abstract<br>screen |
| 4628 | <b>N. L. Brown, V. Luna, M. H. Ramirez, K. A. Vail, C. A. Williams.</b> Developing an effective intervention for IDU women: A harm reduction approach to collaboration. <i>Aids Education and Prevention</i> . 2005. 17:317-333                                                                                         | Level 1, Form<br>Title/abstract<br>screen |
| 4629 | <b>L. D. Brown, G. Townley.</b> Determinants of Engagement in Mental Health Consumer-Run Organizations. <i>Psychiatric Services</i> . 2015. 66:411-417                                                                                                                                                                  | Level 1, Form<br>Title/abstract<br>screen |
| 4631 | <b>K. M. Broome, P. M. Flynn, D. K. Knight, D. D. Simpson.</b> Program structure, staff perceptions, and client engagement in treatment. <i>Journal of Substance Abuse Treatment</i> . 2007. 33:149-158                                                                                                                 | Level 1, Form<br>Title/abstract<br>screen |
| 4632 | <b>M. A. Brondani, R. Alan, L. Donnelly.</b> Stigma of addiction and mental illness in healthcare: The case of patients' experiences in dental settings. <i>Plos One</i> . 2017. 12:13                                                                                                                                  | Level 2, Form<br>Full Text<br>Screening   |
| 4634 | <b>E. Bridges, M. M. McNeill, N. Munro.</b> URESEARCH IN REVIEW: ADVANCING CRITICAL CARE PRACTICE. <i>American Journal of Critical Care</i> . 2017. 26:77-88                                                                                                                                                            | Level 1, Form<br>Title/abstract<br>screen |
| 4636 | <b>L. Brener, W. von Hippel, C. von Hippel, I. Resnick, C. Treloar.</b> Perceptions of discriminatory treatment by staff as predictors of drug treatment completion: Utility of a mixed methods approach. <i>Drug and Alcohol Review</i> . 2010. 29:491-497                                                             | Level 1, Form<br>Title/abstract<br>screen |
| 4637 | <b>L. Brener, G. Rose, C. von Hippel, H. Wilson.</b> Implicit Attitudes, Emotions, and Helping Intentions of Mental Health Workers Toward Their Clients. <i>Journal of Nervous and Mental Disease</i> . 2013. 201:460-463                                                                                               | Level 1, Form<br>Title/abstract<br>screen |
| 4643 | <b>K. J. Bozic, E. Lau, K. Ong, V. Chan, S. Kurtz, T. P. Vail, H. E. Rubash, D. J. Berry.</b> Risk Factors for Early Revision After Primary TKA in Medicare Patients. <i>Clinical Orthopaedics and Related Research</i> . 2014. 472:232-237                                                                             | Level 1, Form<br>Title/abstract<br>screen |
| 4645 | <b>G. Bottesi, M. Ghisi, A. J. Ouimet, M. D. Tira, E. Sanavio.</b> Compulsivity and                                                                                                                                                                                                                                     | Level 1, Form                             |

|      |                                                                                                                                                                                                                                                                                                                        |                                     |
|------|------------------------------------------------------------------------------------------------------------------------------------------------------------------------------------------------------------------------------------------------------------------------------------------------------------------------|-------------------------------------|
|      | Impulsivity in Pathological Gambling: Does a Dimensional-Transdiagnostic Approach Add Clinical Utility to DSM-5 Classification?. <i>Journal of Gambling Studies</i> . 2015. 31:825-847                                                                                                                                 | Title/abstract screen               |
| 4646 | <b>X. Bosch-Capblanch, K. Abba, M. Prictor, P. Garner.</b> Contracts between patients and healthcare practitioners for improving patients' adherence to treatment, prevention and health promotion activities. <i>Cochrane Database of Systematic Reviews</i> . 2007. #volume#:64                                      | Level 1, Form Title/abstract screen |
| 4648 | <b>M. A. Bornovalova, S. B. Daughters.</b> How does dialectical behavior therapy facilitate treatment retention among individuals with comorbid borderline personality disorder and substance use disorders?. <i>Clinical Psychology Review</i> . 2007. 27:923-943                                                     | Level 1, Form Title/abstract screen |
| 4652 | <b>K. I. Bolla, D. A. Eldreth, J. A. Matochik, J. L. Cadet.</b> Neural substrates of faulty decision-making in abstinent marijuana users. <i>Neuroimage</i> . 2005. 26:480-492                                                                                                                                         | Level 1, Form Title/abstract screen |
| 4653 | <b>M. P. Bogenschutz, C. M. A. Geppert, J. George.</b> The role of twelve-step approaches in dual diagnosis treatment and recovery. <i>American Journal on Addictions</i> . 2006. 15:50-60                                                                                                                             | Level 1, Form Title/abstract screen |
| 4656 | <b>A. W. Blume, L. V. Lovato.</b> Empowering the Disempowered: Harm Reduction with Racial/Ethnic Minority Clients. <i>Journal of Clinical Psychology</i> . 2010. 66:189-200                                                                                                                                            | Level 1, Form Title/abstract screen |
| 4658 | <b>B. Biagianni, L. Grazi, O. Gambini, S. Usai, R. Muffatti, S. Scarone, G. Bussone.</b> Decision-making deficit in chronic migraine patients with medication overuse. <i>Neurological Sciences</i> . 2012. 33:S151-S155                                                                                               | Level 1, Form Title/abstract screen |
| 4659 | <b>D. Bhugra, P. Dazzan.</b> Use of the Mental Health Act criteria in the decision-making process for compulsory admissions: A study of psychiatrists in South London. <i>Medicine Science and the Law</i> . 2000. 40:336-344                                                                                          | Level 1, Form Title/abstract screen |
| 4669 | <b>D. Ben-Zeev, S. M. Kaiser, I. Krzos.</b> SERVICES & POLICY. <i>Journal of Dual Diagnosis</i> . 2014. 10:197-203                                                                                                                                                                                                     | Level 1, Form Title/abstract screen |
| 4670 | <b>M. F. Bellolio, W. I. Gilani, P. Barrionuevo, M. H. Murad, P. J. Erwin, J. R. Anderson, J. R. Miner, E. P. Hess.</b> Incidence of Adverse Events in Adults Undergoing Procedural Sedation in the Emergency Department: A Systematic Review and Meta-analysis. <i>Academic Emergency Medicine</i> . 2016. 23:119-134 | Level 1, Form Title/abstract screen |
| 4672 | <b>C. Beeker, J. M. Kraft, R. Goldman, C. Jorgensen.</b> Strategies for increasing colorectal cancer screening among African Americans. <i>Journal of Psychosocial Oncology</i> . 2001. 19:113-132                                                                                                                     | Level 1, Form Title/abstract screen |
| 4673 | <b>F. Beauvais.</b> American Indians and alcohol. <i>Alcohol Health &amp; Research World</i> . 1998. 22:253-259                                                                                                                                                                                                        | Level 1, Form Title/abstract screen |
| 4679 | <b>L. Bartels, P. Easteal.</b> Women prisoners' sexual victimisation: ongoing vulnerabilities and possible responses. <i>Journal of Criminological Research Policy and Practice</i> . 2016. 2:206-216                                                                                                                  | Level 1, Form Title/abstract screen |
| 4692 | <b>G. Baranyi, M. Cassidy, S. Fazel, S. Priebe, A. P. Mundt.</b> Prevalence of Posttraumatic Stress Disorder in Prisoners. <i>Epidemiologic Reviews</i> . 2018. 40:134-145                                                                                                                                             | Level 1, Form Title/abstract screen |
| 4697 | <b>J. S. Baer, S. A. Ball, B. K. Campbell, G. M. Miele, E. P. Schoener, K. Tracy.</b> Training and fidelity monitoring of behavioral interventions in multi-site addictions research. <i>Drug and Alcohol Dependence</i> . 2007. 87:107-118                                                                            | Level 1, Form Title/abstract screen |

|      |                                                                                                                                                                                                                                                                                                                  |                                           |
|------|------------------------------------------------------------------------------------------------------------------------------------------------------------------------------------------------------------------------------------------------------------------------------------------------------------------|-------------------------------------------|
| 4699 | <b>M. H. Ayotte, N. Lanctot, M. Tourigny.</b> Pre-treatment profiles of adolescent girls as predictors of the strength of their working alliances with practitioners in residential care settings. <i>Children and Youth Services Review</i> . 2015. 53:61-69                                                    | Level 1, Form<br>Title/abstract<br>screen |
| 4706 | <b>L. T. Arciniega, I. Cuzmar, W. R. Miller, J. S. Tonigan.</b> Therapeutic alliance, treatment compliance, and satisfaction among hispanic female alcohol abusers. <i>Alcoholism-Clinical and Experimental Research</i> . 2005. 29:159A-159A                                                                    | Level 2, Form<br>Full Text<br>Screening   |
| 4713 | <b>P. C. G. Alves, C. M. D. Sales, M. Ashworth.</b> Enhancing the patient involvement in outcomes: a study protocol of personalised outcome measurement in the treatment of substance misuse. <i>Bmc Psychiatry</i> . 2013. 13:6                                                                                 | Level 2, Form<br>Full Text<br>Screening   |
| 4717 | <b>R. A. Alingh, F. Hoekstra, C. P. van der Schans, F. J. Hettinga, R. Dekker, L. H. V. van der Woude.</b> Protocol of a longitudinal cohort study on physical activity behaviour in physically disabled patients participating in a rehabilitation counselling programme: ReSpAct. <i>Bmj Open</i> . 2015. 5:10 | Level 1, Form<br>Title/abstract<br>screen |
| 4720 | <b>F. Alemi, M. R. Haack, A. Harge, R. Dill, L. Benson.</b> Engaging client's family and friends in online counseling. <i>Journal of Addictions Nursing</i> . 2005. 16:47-55                                                                                                                                     | Level 1, Form<br>Title/abstract<br>screen |
| 4725 | <b>B. Adinoff, T. J. Carmody, R. Walker, D. M. Donovan, G. S. Brigham, T. M. Winhusen.</b> Decision-making processes as predictors of relapse and subsequent use in stimulant-dependent patients. <i>American Journal of Drug and Alcohol Abuse</i> . 2016. 42:88-97                                             | Level 1, Form<br>Title/abstract<br>screen |
| 4726 | <b>S. Y. Adams, A. G. Crawford, R. N. Rimal, J. S. Lee, L. M. Janneck, C. N. Sciamanna.</b> The Effects of a Computer-Tailored Message on Secondary Prevention in Type 2 Diabetes: A Randomized Trial. <i>Population Health Management</i> . 2009. 12:197-204                                                    | Level 1, Form<br>Title/abstract<br>screen |
| 4728 | <b>S. J. Ackerman, M. J. Hilsenroth, E. S. Knowles.</b> Ratings of therapist dynamic activities and alliance early and late in psychotherapy. <i>Psychotherapy</i> . 2005. 42:225-231                                                                                                                            | Level 1, Form<br>Title/abstract<br>screen |
| 4729 | <b>S. J. Ackerman, M. J. Hilsenroth.</b> A review of therapist characteristics and techniques positively impacting the therapeutic alliance. <i>Clinical Psychology Review</i> . 2003. 23:1-33                                                                                                                   | Level 1, Form<br>Title/abstract<br>screen |
| 4734 | <b>BC Guidelines.</b> Problem Drinking-Screening and Assessment. #journal#. #year#. #volume#:#pages#                                                                                                                                                                                                             | Level 1, Form<br>Title/abstract<br>screen |
| 4735 | <b>BCCSU.</b> A guideline for the clinical management of opioid use disorders. #journal#. #year#. #volume#:#pages#                                                                                                                                                                                               | Level 2, Form<br>Full Text<br>Screening   |
| 4736 | <b>BCCSU.</b> Treatment of Opioid Use Disorder for Youth- Guideline Supplement. #journal#. #year#. #volume#:#pages#                                                                                                                                                                                              | Level 2, Form<br>Full Text<br>Screening   |
| 4738 | <b>BC Guidelines.</b> Opioid Use Disorder: Diagnosis and Management in Primary Care. #journal#. #year#. #volume#:#pages#                                                                                                                                                                                         | Level 1, Form<br>Title/abstract<br>screen |
| 4739 | <b>College des Medicines du Quebec.</b> Low-risk drinking guidelines : a guide for physicians and health care professionals. #journal#. #year#. #volume#:#pages#                                                                                                                                                 | Level 1, Form<br>Title/abstract<br>screen |
| 4740 | <b>CRISM/CIHR.</b> CRISM National Guideline for the Clinical Management of Opioid Use Disorder. #journal#. #year#. #volume#:#pages#                                                                                                                                                                              | Level 2, Form<br>Full Text<br>Screening   |



|      |                                                                                                                                                                                                                                                                                   |                                           |
|------|-----------------------------------------------------------------------------------------------------------------------------------------------------------------------------------------------------------------------------------------------------------------------------------|-------------------------------------------|
| 4741 | <b>Ordean, A.; Wong, S.; Graves, L.</b> Substance Use in Pregnancy. <i>#journal#</i> .<br><i>#year#</i> . <i>#volume#</i> : <i>#pages#</i>                                                                                                                                        | Level 1, Form<br>Title/abstract<br>screen |
| 4742 | <b>Christina N. Grant, Richard E. Bélanger.</b> Position Statement: Cannabis and Canada's Children and Youth. <i>#journal#</i> . <i>#year#</i> . <i>#volume#</i> : <i>#pages#</i>                                                                                                 | Level 1, Form<br>Title/abstract<br>screen |
| 4743 | <b>Canadian Task Force on Preventive Health Care*</b> . Recommendations on behavioural interventions for the prevention and treatment of cigarette smoking among school-aged children and youth. <i>#journal#</i> . <i>#year#</i> . <i>#volume#</i> : <i>#pages#</i>              | Level 1, Form<br>Title/abstract<br>screen |
| 4745 | <b>Ontario Association of Medical Laboratories.</b> Guidelines for Ordering Urine Testing for Drugs-of-Abuse: Targeted and Screening Tests (CLP013). <i>#journal#</i> . <i>#year#</i> . <i>#volume#</i> : <i>#pages#</i>                                                          | Level 1, Form<br>Title/abstract<br>screen |
| 4747 | <b>Canadian Pediatric Society.</b> Tobacco use and misuse among Indigenous children and youth in Canada. <i>#journal#</i> . <i>#year#</i> . <i>#volume#</i> : <i>#pages#</i>                                                                                                      | Level 1, Form<br>Title/abstract<br>screen |
| 4748 | <b>Alberta Health Services.</b> Tobacco Screening and Treatment for Adult Cancer Patients. <i>#journal#</i> . <i>#year#</i> . <i>#volume#</i> : <i>#pages#</i>                                                                                                                    | Level 1, Form<br>Title/abstract<br>screen |
| 4749 | <b>College of Physicians and Surgeons of British Columbia.</b> Methadone and Buprenorphine: Clinical Practice Guideline for Opioid Use Disorder. <i>#journal#</i> .<br><i>#year#</i> . <i>#volume#</i> : <i>#pages#</i>                                                           | Level 1, Form<br>Title/abstract<br>screen |
| 4750 | <b>Linda Ritchie, PhD, RN; Marilyn K. Evans, PhD, RN; and Janet Matthews, MScN, RN.</b> Nursing students and clinical instructors' perceptions on the implementation of a best practice guideline.. <i>#journal#</i> . <i>#year#</i> .<br><i>#volume#</i> : <i>#pages#</i>        | Level 1, Form<br>Title/abstract<br>screen |
| 4754 | <b>BC Patient Safety and Quality Council.</b> BC's Quality and Safety Community: Findings from an Environmental Scan and Stakeholder Consultation. <i>#journal#</i> .<br><i>#year#</i> . <i>#volume#</i> : <i>#pages#</i>                                                         | Level 1, Form<br>Title/abstract<br>screen |
| 4755 | <b>Health Quality Council.</b> Think Big, Start Small, Act Now: Tackling Indicator Chaos. <i>#journal#</i> . <i>#year#</i> . <i>#volume#</i> : <i>#pages#</i>                                                                                                                     | Level 1, Form<br>Title/abstract<br>screen |
| 4756 | <b>BC Ministry of Health.</b> Best Practice Guideline for Accommodating and Managing Behavioural and Psychological Symptoms of Dementia in Residential Care: A Person-Centered Interdisciplinary Approach. <i>#journal#</i> . <i>#year#</i> .<br><i>#volume#</i> : <i>#pages#</i> | Level 1, Form<br>Title/abstract<br>screen |
| 4757 | <b>KPMG.</b> The Need for More Effective Patient- and Family-centred Care Report on the patient experience component of the Saskatchewan Patient First Review. <i>#journal#</i> . <i>#year#</i> . <i>#volume#</i> : <i>#pages#</i>                                                | Level 1, Form<br>Title/abstract<br>screen |
| 4758 | <b>KPMG.</b> The Need for More Effective Patient- and Family-centred Care Detailed research and findings of the patient experience component of the Saskatchewan Patient First Review. <i>#journal#</i> . <i>#year#</i> . <i>#volume#</i> : <i>#pages#</i>                        | Level 1, Form<br>Title/abstract<br>screen |
| 4759 | <b>Health Quality Ontario.</b> Care Coordination for Postacute Stroke, Chronic Obstructive Pulmonary Disease, and Heart Failure Clients: An Economic Rapid Review. <i>#journal#</i> . <i>#year#</i> . <i>#volume#</i> : <i>#pages#</i>                                            | Level 1, Form<br>Title/abstract<br>screen |
| 4760 | <b>Ghazipura, M.</b> . Care Coordination on Postacute Stroke, Chronic Obstructive Pulmonary Disease, and Heart Failure Clients: A Rapid Review. <i>#journal#</i> .<br><i>#year#</i> . <i>#volume#</i> : <i>#pages#</i>                                                            | Level 1, Form<br>Title/abstract<br>screen |
| 4761 | <b>Canadian Pharmacists Association.</b> Our way forward Optimizing drug                                                                                                                                                                                                          | Level 1, Form                             |

|      |                                                                                                                                                                                                                                   |                                     |
|------|-----------------------------------------------------------------------------------------------------------------------------------------------------------------------------------------------------------------------------------|-------------------------------------|
|      | therapy outcomes for Canadians through patient-centred care. #journal#. #year#. #volume#:#pages#                                                                                                                                  | Title/abstract screen               |
| 4762 | <b>New Brunswick Health Council.</b> New Brunswickers' Experiences With Primary Health Care. #journal#. #year#. #volume#:#pages#                                                                                                  | Level 1, Form Title/abstract screen |
| 4764 | <b>Canadian Life and Health Insurance Association Inc. .</b> CLHIA REPORT ON LONG-TERM CARE POLICY IMPROVING THE ACCESSIBILITY, QUALITY AND SUSTAINABILITY OF LONG-TERM CARE IN CANADA. #journal#. #year#. #volume#:#pages#       | Level 1, Form Title/abstract screen |
| 4765 | <b>BC Patient Safety &amp; Quality Council.</b> THE JOURNEY TOWARDS DIGNITY & RESIDENT-CENTERED CARE: SUMMARY RESULTS FROM THE CALL FOR LESS ANTIPSYCHOTICS IN RESIDENTIAL CARE. #journal#. #year#. #volume#:#pages#              | Level 1, Form Title/abstract screen |
| 4766 | <b>Bernard Richard and Shirley Smallwood Task Force Co-Chairs.</b> Staying Connected A Report of the Task Force on a Centre of Excellence for Children and Youth with Complex Needs. #journal#. #year#. #volume#:#pages#          | Level 1, Form Title/abstract screen |
| 4767 | <b>Rivers &amp; Associates.</b> SUPPORTED CHILD DEVELOPMENT PROGRAM REVIEW. #journal#. #year#. #volume#:#pages#                                                                                                                   | Level 1, Form Title/abstract screen |
| 4768 | <b>Burntwood Regional Health Authority.</b> Burntwood Regional Health Authority 2009 Community Health Assessment. #journal#. #year#. #volume#:#pages#                                                                             | Level 1, Form Title/abstract screen |
| 4769 | <b>Regional Municipality of Waterloo.</b> Best Practice in Housing Design for Seniors' Supportive Housing. #journal#. #year#. #volume#:#pages#                                                                                    | Level 1, Form Title/abstract screen |
| 4770 | <b>U.S. Department of Health and Human Services Public Health Service.</b> Helping Smokers Quit A Guide for Clinicians. #journal#. #year#. #volume#:#pages#                                                                       | Level 1, Form Title/abstract screen |
| 4771 | <b>US Department of Health and Human Services.</b> Treating Tobacco Use and Dependence- Quick reference guide for clinicians. #journal#. #year#. #volume#:#pages#                                                                 | Level 1, Form Title/abstract screen |
| 4772 | <b>U.S. Department of Health and Human Services Public Health Service.</b> Treating Tobacco Use and Dependence: 2008 Update. #journal#. #year#. #volume#:#pages#                                                                  | Level 1, Form Title/abstract screen |
| 4773 | <b>Agency for Healthcare Research and Quality.</b> Implementing Medication-Assisted Treatment for Opioid Use Disorder in Rural Primary Care: Environmental Scan Volume 1. #journal#. #year#. #volume#:#pages#                     | Level 1, Form Title/abstract screen |
| 4774 | <b>Agency for Healthcare Research and Quality.</b> Implementing Medication-Assisted Treatment for Opioid Use Disorder in Rural Primary Care: Environmental Scan Volume 2 Tools and Resources. #journal#. #year#. #volume#:#pages# | Level 1, Form Title/abstract screen |
| 4775 | <b>NHS National Treatment Agency for Substance Misuse.</b> Improving services for substance misuse. #journal#. #year#. #volume#:#pages#                                                                                           | Level 2, Form Full Text Screening   |
| 4776 | <b>World Health Organization.</b> mhGAP Intervention Guide for mental, neurological and substance use disorders in non-specialized health settings. #journal#. #year#. #volume#:#pages#                                           | Level 1, Form Title/abstract screen |
| 4777 | <b>NHS National Treatment Agency for Substance Misuse.</b> Good practice in                                                                                                                                                       | Level 1, Form Title/abstract        |

|      |                                                                                                                                                                                                            |                                     |
|------|------------------------------------------------------------------------------------------------------------------------------------------------------------------------------------------------------------|-------------------------------------|
|      | harm reduction. #journal#. #year#. #volume#:#pages#                                                                                                                                                        | screen                              |
| 4778 | <b>NHS National Treatment Agency for Substance Misuse.</b> Injectable heroin (and injectable methadone). Potential roles in drug treatment. #journal#. #year#. #volume#:#pages#                            | Level 1, Form Title/abstract screen |
| 4779 | <b>NHS National Prescribing Centre.</b> A guide to good practice in the management of controlled drugs in primary care (England). #journal#. #year#. #volume#:#pages#                                      | Level 1, Form Title/abstract screen |
| 4780 | <b>The American College of Obstetricians and Gynecologists.</b> Alcohol Abuse and Other Substance Use Disorders: Ethical Issues in Obstetric and Gynecologic Practice. #journal#. #year#. #volume#:#pages# | Level 1, Form Title/abstract screen |
| 4781 | <b>Canadian Paediatric Society.</b> Position Statement: Harm reduction: An approach to reducing risky health behaviours in adolescents. #journal#. #year#. #volume#:#pages#                                | Level 1, Form Title/abstract screen |
| 4782 | <b>Committee on Obstetric Practice, American Society of Addiction Medicine.</b> Opioid Use and Opioid Use Disorder in Pregnancy. #journal#. #year#. #volume#:#pages#                                       | Level 1, Form Title/abstract screen |
| 4783 | <b>Harvey, J; Chadi, N.</b> Strategies to promote smoking cessation among adolescents. #journal#. #year#. #volume#:#pages#                                                                                 | Level 1, Form Title/abstract screen |
