# Supplementary material for: Conceptualizing patient-centered care for substance use disorder treatment: findings from a systematic scoping review
Source: Subst Abuse Treat Prev Policy. 2019 Sep 11;14:37. doi: 10.1186/s13011-019-0227-0 (PMC6739978; doi:10.1186/s13011-019-0227-0)
Supplement: Supplementary file 6 — Detailed extracted data. (XLSX 33 kb) [file 13011_2019_227_MOESM6_ESM.xlsx]

## Sheet: DistillerSR
										PCC Principles Described by Each Reference
Reference ID	Reference	Reference Type	Year	Publication Location	Language	Target Sample	Main substance category	Setting	Type of Addiction Treatment	Holistic Care	Individualized Care	Shared Decision-Making	Therapeutic Alliance	Trauma-informed Care	Culturally-safe Care
7	Yarborough BJH, Chi FW, Green CA, Hinman A, Mertens J, Beck A, et al. Patient and System Characteristics Associated with Performance on the HEDIS Measures of Alcohol and Other Drug Treatment Initiation and Engagement. Journal of addiction medicine. 2018.	Mixed-Methods	2018	North America	English	Health care providers in SUD treatment settings	Polysubstance	Inpatient + Outpatient	Pharmacological + Psychosocial	1	1	0	0	0	0
19	Cordaro M, Tubman JG, Wagner EF, Morris SL. Treatment Process Predictors of Program Completion or Dropout among Minority Adolescents Enrolled in a Brief Motivational Substance Abuse Intervention. Journal of child & adolescent substance abuse. 2012;21(1):51.	Quantitative	2012	North America	English	Youth patients/clients with SUD accessing treatment	Polysubstance	Outpatient	Psychosocial	0	0	0	1	0	0
23	Mericle AA, Casaletto K, Knoblach D, Brooks AC, Carise D. Barriers to Implementing Individualized Substance Abuse Treatment: Qualitative Findings from the CASPAR Replication Studies. Journal of drug issues. 2009;40(4):819.	Qualitative	2009	North America	English	Health care providers in SUD treatment settings	People receiving addiction treatment in general	Outpatient	Psychosocial	0	1	0	0	0	0
31	Deirdre R, Simon A, Daryle D. Therapeutic alliance predicts mood but not alcohol outcome in a comorbid treatment setting. Journal of substance abuse treatment. 2018;91:28.	Quantitative	2018	Australia	English	Youth patients/clients with SUD accessing treatment	Dual diagnosis	Outpatient	Psychosocial	0	0	0	1	0	0
41	Bradley KA, Bobb JF, Ludman EJ, Chavez LJ, Saxon AJ, Merrill JO, et al. Alcohol-Related Nurse Care Management in Primary Care: A Randomized Clinical Trial. JAMA internal medicine. 2018;178(5):613.	Quantitative	2018	North America	English	Adult patients/clients with SUD accessing treatment	Alcohol	Outpatient	Psychosocial	0	1	1	0	0	0
78	Pablo B, Antoni G. Patient-centered care interventions for the management of alcohol use disorders: a systematic review of randomized controlled trials. Patient preference and adherence. 2017;10:1823.	Review	2017	Europe	English	Adult patients/clients with SUD accessing treatment	Alcohol	Outpatient	Pharmacological + Psychosocial	0	1	1	0	0	0
84	Alison H, Frances K-L, Jenny B, Steven C. Avoiding emotional bonds: an examination of the dimensions of therapeutic alliance among cannabis users. Frontiers in psychiatry. 2013;4:70.	Quantitative	2013	Australia	English	Youth patients/clients with SUD accessing treatment	Cannabis	Outpatient	Psychosocial	0	0	0	1	0	0
86	Korthuis PT, Gregg J, Rogers WE, McCarty D, Nicolaidis C, Boverman J. Patients' Reasons for Choosing Office-based Buprenorphine: Preference for Patient-Centered Care. Journal of addiction medicine. 2010;4(4):204.	Qualitative	2010	North America	English	Adult patients/clients with SUD accessing treatment	Opioids	Outpatient	Pharmacological	1	0	1	1	0	0
87	Banazadeh N, Kheradmand A, Abedi H. Opiate dependents' experiences of the therapeutic relationship in methadone centers; a qualitative study. Addiction & health. 2009;1(1):12.	Qualitative	2009	Asia	English	Adult patients/clients with SUD accessing treatment	Opioids	Outpatient	Pharmacological	1	0	0	1	0	0
88	Lawn S, Pols RG, Battersby MW. Working effectively with patients with comorbid mental illness and substance abuse: a case study using a structured motivational behavioural approach. BMJ case reports. 2009;2009.	Report	2009	Australia	English	Adult patients/clients with SUD accessing treatment	Dual diagnosis	Outpatient	Psychosocial	0	1	1	1	0	0
89	Joosten EAG, de Weert GH, Sensky T, van der Staak CPF, de Jong CAJ. Effect of shared decision-making on therapeutic alliance in addiction health care. Patient preference and adherence. 2008;2:277.	Quantitative	2008	Europe	English	Adult patients/clients with SUD accessing treatment	People receiving addiction treatment in general	Inpatient	Psychosocial	0	1	1	0	0	0
128	Schwartz RP, Kelly SM, Mitchell SG, Gryczynski J, O'Grady KE, Gandhi D, et al. Patient-centered methadone treatment: a randomized clinical trial. Addiction (Abingdon, England). 2017;112(3):454.	Quantitative	2017	North America	English	Youth patients/clients with SUD accessing treatment	Opioids	Outpatient	Pharmacological + Psychosocial	0	0	1	0	0	0
131	Daniel EJ, Thomas M, Shana R, Brooke M, Carol EG, Catherine G, et al. Implementation and Quality Improvement of a Screening and Counseling Program for Unhealthy Alcohol Use in an Academic General Internal Medicine Practice. Journal for healthcare quality : official publication of the National Association for Healthcare Quality. 2016;39(1):15.	Report	2016	North America	English	Adult patients/clients with SUD accessing treatment	Alcohol	Outpatient	Psychosocial	0	0	1	0	0	0
137	Cacchione PZ, Eible L, Gill LR, L. , Huege S, F. . Person-Centered Care for Older Adults With Serious Mental Illness and Substance Misuse Within a Program of All-Inclusive Care for the Elderly. Journal of gerontological nursing. 2016;42(5):11.	Report	2016	North America	English	Adult patients/clients with SUD accessing treatment	Dual diagnosis	Inpatient	Psychosocial	1	1	1	0	0	1
155	Lefebvre L, Midmer D, Boyd JA, Ordean A, Graves L, Kahan M, et al. Participant perception of an integrated program for substance abuse in pregnancy. Journal of obstetric, gynecologic, and neonatal nursing : JOGNN. 2010;39(1):46.	Qualitative	2010	North America	English	Adult patients/clients with SUD accessing treatment	People receiving addiction treatment in general	Outpatient	Pharmacological + Psychosocial	1	0	1	1	0	0
159	Mena JA, Ampadu GG, Prochaska JO. The Influence of Engagement and Satisfaction on Smoking Cessation Interventions: A Qualitative Study. Substance use & misuse. 2017;52(3):322.	Qualitative	2017	North America	English	Adult patients/clients with SUD accessing treatment	Tobacco	Outpatient	Psychosocial	0	1	1	1	0	0
165	Daniels RA, Holdsworth E, Tramontano C. Relating Therapist Characteristics to Client Engagement and the Therapeutic Alliance in an Adolescent Custodial Group Substance Misuse Treatment Program. Substance use & misuse. 2017;52(9):1139.	Quantitative	2017	Europe	English	Youth patients/clients with SUD accessing treatment	People receiving addiction treatment in general	Inpatient	Psychosocial	0	0	0	1	0	0
196	Steinka-Fry KT, Tanner-Smith EE, Dakof GA, Henderson C. Culturally sensitive substance use treatment for racial/ethnic minority youth: A meta-analytic review. Journal of substance abuse treatment. 2017;75:22.	Review	2017	North America	English	Youth patients/clients with SUD accessing treatment	People receiving addiction treatment in general	Outpatient	Pharmacological + Psychosocial	0	0	0	0	0	1
197	Timko C, Schultz NR, Britt J, Cucciare MA. Transitioning From Detoxification to Substance Use Disorder Treatment: Facilitators and Barriers. Journal of substance abuse treatment. 2016;70:64.	Qualitative	2016	North America	English	Health care providers in SUD treatment settings	People receiving addiction treatment in general	Inpatient + Outpatient	Pharmacological	1	1	0	1	0	0
201	McCallum SL, Mikocka-Walus AA, Gaughwin MD, Andrews JM, Turnbull DA. 'I'm a sick person, not a bad person': patient experiences of treatments for alcohol use disorders. Health expectations : an international journal of public participation in health care and health policy. 2016;19(4):828.	Qualitative	2016	Australia	English	Adult patients/clients with SUD accessing treatment	Alcohol	Inpatient + Outpatient	Pharmacological + Psychosocial	1	0	1	1	0	0
242	Gerard JC, Stephen AM, Robert CS, Ronda LD, Mark AP, Mark RD. Therapeutic alliances predict session by session drinking behavior in the treatment of alcohol use disorders. Journal of consulting and clinical psychology. 2016;84(11):972.	Quantitative	2016	North America	English	Youth patients/clients with SUD accessing treatment	Alcohol	Outpatient	Psychosocial	0	0	0	1	0	0
257	DiClemente CC, Norwood AEQ, Gregory WH, Travaglini L, Graydon MM, Corno CM. Consumer-Centered, Collaborative, and Comprehensive Care: The Core Essentials of Recovery-Oriented System of Care. Journal of addictions nursing. 2016;27(2):94.	Guideline	2016	North America	English	Health care providers in SUD treatment settings	People receiving addiction treatment in general	Inpatient + Outpatient	Pharmacological + Psychosocial	1	1	1	0	0	0
268	Prince MA, Connors GJ, Maisto SA, Dearing RL. Within treatment therapeutic alliance ratings profiles predict posttreatment frequency of alcohol use. Psychology of addictive behaviors : journal of the Society of Psychologists in Addictive Behaviors. 2016;30(2):184.	Quantitative	2016	North America	English	Adult patients/clients with SUD accessing treatment	Alcohol	Outpatient	Psychosocial	0	0	0	1	0	0
274	Cermak TL. Clinical Approach to the Heavy Cannabis User in the Age of Medical Marijuana. Journal of psychoactive drugs. 2015;48(1):31.	Report	2015	North America	English	Health care providers in SUD treatment settings	Cannabis	Inpatient + Outpatient	Psychosocial	0	1	0	1	0	0
281	Friedrichs A, Spies M, Harter M, Buchholz A. Patient Preferences and Shared Decision Making in the Treatment of Substance Use Disorders: A Systematic Review of the Literature. PloS one. 2016;11(1):e0145817.	Review	2016	Europe	English	Adult patients/clients with SUD accessing treatment	People receiving addiction treatment in general	Inpatient + Outpatient	Pharmacological + Psychosocial	0	0	1	0	0	0
287	Fox AD, Masyukova M, Cunningham CO. Optimizing psychosocial support during office-based buprenorphine treatment in primary care: Patients' experiences and preferences. Substance abuse. 2016;37(1):70.	Qualitative	2016	North America	English	Adult patients/clients with SUD accessing treatment	Opioids	Outpatient	Pharmacological + Psychosocial	1	1	1	1	0	0
328	Blonigen DM, Timko C, Jacob T, Moos RH. Patient-centered feedback on the results of personality testing increases early engagement in residential substance use disorder treatment: a pilot randomized controlled trial. Addiction science & clinical practice. 2015;10:9.	Quantitative	2015	North America	English	Adult patients/clients with SUD accessing treatment	People receiving addiction treatment in general	Inpatient	Not specified	0	1	0	0	0	0
333	Maisto SA, Roos CR, O'Sickey AJ, Kirouac M, Connors GJ, Tonigan JS, et al. The indirect effect of the therapeutic alliance and alcohol abstinence self-efficacy on alcohol use and alcohol-related problems in Project MATCH. Alcoholism, clinical and experimental research. 2015;39(3):504.	Quantitative	2015	North America	English	Adult patients/clients with SUD accessing treatment	Alcohol	Outpatient	Psychosocial	0	0	0	1	0	0
345	Nelson EC, Lazar J. Mollie's story: a case and a place that exemplify person-centered care. The Journal of ambulatory care management. 2015;38(1):87.	Report	2015	North America	English	Adult patients/clients with SUD accessing treatment	Dual diagnosis	Outpatient	Psychosocial	1	1	0	0	0	0
355	Rance J, Treloar C. "We are people too": consumer participation and the potential transformation of therapeutic relations within drug treatment. The International journal on drug policy. 2015;26(1):30.	Qualitative	2015	Australia	English	Both health care providers and patients/clients	People receiving addiction treatment in general	Inpatient + Outpatient	Pharmacological + Psychosocial	0	0	0	1	0	0
363	Marcellus L. Supporting women with substance use issues: trauma-informed care as a foundation for practice in the NICU. Neonatal network : NN. 2014;33(6):307.	Guideline	2014	North America	English	Health care providers in SUD treatment settings	Dual diagnosis	Inpatient	Psychosocial	0	0	0	0	1	0
397	Rance J, Treloar C, Ethos Study Group. 'Not just methadone Tracy': transformations in service-user identity following the introduction of hepatitis C treatment into Australian opiate substitution settings. Addiction (Abingdon, England). 2014;109(3):452.	Qualitative	2014	Australia	English	Both health care providers and patients/clients	Polysubstance	Outpatient	Psychosocial	0	0	0	1	0	0
402	Frankl M, Philips B, Wennberg P. Psychotherapy role expectations and experiences - discrepancy and therapeutic alliance among patients with substance use disorders. Psychology and psychotherapy. 2014;87(4):411.	Quantitative	2014	Europe	English	Adult patients/clients with SUD accessing treatment	People receiving addiction treatment in general	Outpatient	Psychosocial	0	1	0	1	0	0
421	von Braun T. Chapter 12. Therapists' narratives of therapeutic relationships in the treatment of drug-dependent patients. Substance use & misuse. 2013;48(13):1416.	Report	2013	Europe	English	Health care providers in SUD treatment settings	People receiving addiction treatment in general	Outpatient	Psychosocial	0	0	0	1	0	0
422	Hodgkin J, E. , Sachs D, P. L. , Swan G, E. , Jack L, M. , Titus B, L. , Waldron S, J. S. , et al. Outcomes from a patient-centered residential treatment plan for tobacco dependence. Mayo Clinic proceedings. 2013;88(9):970.	Report	2013	North America	English	Adult patients/clients with SUD accessing treatment	Tobacco	Inpatient	Pharmacological + Psychosocial	1	1	1	0	0	1
438	Goldberg SB, Davis JM, Hoyt WT. The role of therapeutic alliance in mindfulness interventions: therapeutic alliance in mindfulness training for smokers. Journal of clinical psychology. 2013;69(9):936.	Quantitative	2013	North America	English	Adult patients/clients with SUD accessing treatment	Tobacco	Outpatient	Pharmacological + Psychosocial	0	0	0	1	0	0
442	Borge L, Rossberg JI, Sverdrup S. Cognitive milieu therapy and physical activity: experiences of mastery and learning among patients with dual diagnosis. Journal of psychiatric and mental health nursing. 2013;20(10):932.	Qualitative	2013	Europe	English	Adult patients/clients with SUD accessing treatment	Dual diagnosis	Inpatient	Pharmacological + Psychosocial	1	1	1	1	0	0
454	Matthews AK, Conrad M, Kuhns L, Vargas M, King AC. Project Exhale: preliminary evaluation of a tailored smoking cessation treatment for HIV-positive African American smokers. AIDS patient care and STDs. 2013;27(1):22.	Quantitative	2013	North America	English	Adult patients/clients with SUD accessing treatment	Tobacco	Outpatient	Pharmacological + Psychosocial	0	0	0	0	0	1
461	Moyers TB, Miller WR. Is low therapist empathy toxic? Psychology of addictive behaviors : journal of the Society of Psychologists in Addictive Behaviors. 2013;27(3):878.	Report	2013	North America	English	Adult patients/clients with SUD accessing treatment	People receiving addiction treatment in general	Outpatient	Psychosocial	0	0	0	1	0	0
487	Ruglass LM, Miele GM, Hien DA, Campbell ANC, Hu M-C, Caldeira N, et al. Helping alliance, retention, and treatment outcomes: a secondary analysis from the NIDA Clinical Trials Network Women and Trauma Study. Substance use & misuse. 2012;47(6):695.	Quantitative	2012	North America	English	Youth patients/clients with SUD accessing treatment	Dual diagnosis	Outpatient	Pharmacological + Psychosocial	0	0	0	1	0	0
500	Urbanoski KA, Kelly JF, Hoeppner BB, Slaymaker V. The role of therapeutic alliance in substance use disorder treatment for young adults. Journal of substance abuse treatment. 2012;43(3):344.	Quantitative	2012	North America	English	Youth patients/clients with SUD accessing treatment	People receiving addiction treatment in general	Inpatient	Psychosocial	0	0	0	1	0	0
504	Bowen S, Kurz AS. Between-session practice and therapeutic alliance as predictors of mindfulness after mindfulness-based relapse prevention. Journal of clinical psychology. 2012;68(3):236.	Quantitative	2012	North America	English	Adult patients/clients with SUD accessing treatment	People receiving addiction treatment in general	Outpatient	Psychosocial	0	0	0	1	0	0
534	Woolhouse S, Brown JB, Thind A. 'Meeting people where they're at': experiences of family physicians engaging women who use illicit drugs. Annals of family medicine. 2014;9(3):244.	Qualitative	2014	North America	English	Health care providers in SUD treatment settings	People receiving addiction treatment in general	Outpatient	Not specified	0	0	1	1	0	0
539	Marcus DK, Kashy DA, Wintersteen MB, Diamond GS. The therapeutic alliance in adolescent substance abuse treatment: a one-with-many analysis. Journal of counseling psychology. 2011;58(3):449.	Quantitative	2011	North America	English	Both health care providers and patients/clients	Cannabis	Outpatient	Psychosocial	0	0	0	1	0	0
547	Joosten EAG, De Jong C, A. J. , de Weert-van Oene G, H. , Sensky T, van der Staak C, P. F. . Shared decision-making: increases autonomy in substance-dependent patients. Substance use & misuse. 2011;46(8):1037.	Quantitative	2011	Europe	English	Adult patients/clients with SUD accessing treatment	People receiving addiction treatment in general	Inpatient	Psychosocial	0	1	1	0	0	0
561	Joosten EAG, De Weert-Van Oene GH, Sensky T, Van Der Staak CPF, De Jong CAJ. Treatment goals in addiction healthcare: the perspectives of patients and clinicians. The International journal of social psychiatry. 2009;57(3):263.	Quantitative	2009	Europe	English	Both health care providers and patients/clients	People receiving addiction treatment in general	Inpatient	Psychosocial	0	1	1	0	0	0
620	Campbell BK, Fuller BE, Lee ES, Tillotson C, Woelfel T, Jenkins L, et al. Facilitating outpatient treatment entry following detoxification for injection drug use: a multisite test of three interventions. Psychology of addictive behaviors : journal of the Society of Psychologists in Addictive Behaviors. 2009;23(2):260.	Quantitative	2009	North America	English	Youth patients/clients with SUD accessing treatment	Polysubstance	Inpatient	Psychosocial	0	1	1	1	0	0
622	Joosten EAG, De Jong CAJ, De Weert-van Oene GH, Sensky T, van der Staak CPF. Shared decision-making reduces drug use and psychiatric severity in substance-dependent patients. Psychotherapy and psychosomatics. 2009;78(4):245.	Quantitative	2009	Europe	English	Adult patients/clients with SUD accessing treatment	People receiving addiction treatment in general	Inpatient	Psychosocial	0	1	1	0	0	0
626	Guichenez P. [Establishment of a therapeutic alliance in smoking cessation within the framework of behavioral and cognitive therapies]. Revue des maladies respiratoires. 2009;26(3):339.	Report	2009	Europe	French	Adult patients/clients with SUD accessing treatment	Tobacco	Outpatient	Psychosocial	0	0	0	1	0	0
637	Covington SS. Women and addiction: a trauma-informed approach. Journal of psychoactive drugs. 2008;Suppl 5:377.	Guideline	2008	North America	English	Health care providers in SUD treatment settings	Dual diagnosis	Inpatient + Outpatient	Not specified	1	1	0	1	1	0
656	Garner BR, Godley SH, Funk RR. Predictors of early therapeutic alliance among adolescents in Substance abuse treatment. Journal of psychoactive drugs. 2008;40(1):55.	Quantitative	2008	North America	English	Youth patients/clients with SUD accessing treatment	People receiving addiction treatment in general	Outpatient	Psychosocial	0	0	0	1	0	0
662	Dundon WD, Pettinati HM, Lynch KG, Xie H, Varillo KM, Makadon C, et al. The therapeutic alliance in medical-based interventions impacts outcome in treating alcohol dependence. Drug and alcohol dependence. 2008;95(3):230.	Quantitative	2008	North America	English	Adult patients/clients with SUD accessing treatment	Alcohol	Outpatient	Pharmacological + Psychosocial	0	0	0	1	0	0
672	Alexander JA, Nahra TA, Lemak CH, Pollack H, Campbell CI. Tailored treatment in the outpatient substance abuse treatment sector: 1995-2005. Journal of substance abuse treatment. 2008;34(3):282.	Quantitative	2008	North America	English	Adult patients/clients with SUD accessing treatment	People receiving addiction treatment in general	Outpatient	Psychosocial	1	1	1	0	0	0
710	Diamond GS, Liddle H, A. , Wintersteen MB, Dennis ML, Godley SH, Tims F. Early therapeutic alliance as a predictor of treatment outcome for adolescent cannabis users in outpatient treatment. The American journal on addictions. 2006;15 Suppl 1:26.	Quantitative	2006	North America	English	Youth patients/clients with SUD accessing treatment	Cannabis	Outpatient	Psychosocial	0	0	0	1	0	0
720	Ilgen M, A. , McKellar J, Moos R, Finney J, W. . Therapeutic alliance and the relationship between motivation and treatment outcomes in patients with alcohol use disorder. Journal of substance abuse treatment. 2006;31(2):157.	Quantitative	2006	North America	English	Adult patients/clients with SUD accessing treatment	Alcohol	Outpatient	Psychosocial	0	0	0	1	0	0
729	Ilgen M, Tiet Q, Finney JW, Moos RH. Self-efficacy, therapeutic alliance, and alcohol-use disorder treatment outcomes. Journal of studies on alcohol. 2006;67(3):465.	Quantitative	2006	North America	English	Adult patients/clients with SUD accessing treatment	Alcohol	Outpatient	Psychosocial	0	0	0	1	0	0
731	Robbins MS, Liddle HA, Turner CW, Dakof GA, Alexander JF, Kogan SM. Adolescent and parent therapeutic alliances as predictors of dropout in multidimensional family therapy. Journal of family psychology : JFP : journal of the Division of Family Psychology of the American Psychological Association (Division 43). 2006;20(1):108.	Quantitative	2006	North America	English	Youth patients/clients with SUD accessing treatment	People receiving addiction treatment in general	Outpatient	Psychosocial	0	0	0	1	0	0
732	Hogue A, Dauber S, Stambaugh LF, Cecero JJ, Liddle HA. Early therapeutic alliance and treatment outcome in individual and family therapy for adolescent behavior problems. Journal of consulting and clinical psychology. 2006;74(1):121.	Quantitative	2006	North America	English	Youth patients/clients with SUD accessing treatment	People receiving addiction treatment in general	Outpatient	Psychosocial	0	0	0	1	0	0
734	De Weert-Van Oene GH, Jorg FJ, de Jong CAJ. Association between interpersonal behaviour and helping alliance in	Quantitative	2006	Europe	English	Adult patients/clients with SUD accessing treatment	People receiving addiction treatment in general	Inpatient + Outpatient	Psychosocial	0	0	0	1	0	0
738	Meier PS, Donmall MC, McElduff P, Barrowclough C, Heller RF. The role of the early therapeutic alliance in predicting drug treatment dropout. Drug and alcohol dependence. 2006;83(1):57.	Quantitative	2006	Europe	English	Adult patients/clients with SUD accessing treatment	People receiving addiction treatment in general	Inpatient	Psychosocial	0	0	0	1	0	0
752	Meier PS, Donmall MC, Barrowclough C, McElduff P, Heller RF. Predicting the early therapeutic alliance in the treatment of drug misuse. Addiction (Abingdon, England). 2005;100(4):500.	Quantitative	2005	Europe	English	Adult patients/clients with SUD accessing treatment	People receiving addiction treatment in general	Inpatient	Psychosocial	0	0	0	1	0	0
755	Meier PS, Barrowclough C, Donmall MC. The role of the therapeutic alliance in the treatment of substance misuse: a critical review of the literature. Addiction (Abingdon, England). 2005;100(3):304.	Review	2005	Europe	English	Adult patients/clients with SUD accessing treatment	People receiving addiction treatment in general	Inpatient + Outpatient	Pharmacological + Psychosocial	0	0	0	1	0	0
761	Jonsdottir H, Jonsdottir R, Geirsdottir T, Sigridur Sveinsdottir K, Sigurdardottir T. Multicomponent individualized smoking cessation intervention for patients with lung disease. Journal of advanced nursing. 2004;48(6):594.	Quantitative	2004	Europe	English	Adult patients/clients with SUD accessing treatment	Tobacco	Inpatient	Pharmacological + Psychosocial	1	1	1	1	0	0
766	Pantalon MV, Chawarski MC, Falcioni J, Pakes J, Schottenfeld RS. Linking process and outcome in the community reinforcement approach for treating cocaine dependence: a preliminary report. The American journal of drug and alcohol abuse. 2004;30(2):353.	Quantitative	2004	North America	English	Adult patients/clients with SUD accessing treatment	Stimulants	Outpatient	Psychosocial	0	0	0	1	0	0
772	Brown RL, Pfeifer JM, Gjerde CL, Seibert CS, Haq CL. Teaching patient-centered tobacco intervention to first-year medical students. Journal of general internal medicine. 2004;19(5 Pt 2):534.	Report	2004	North America	English	Health care providers in SUD treatment settings	Tobacco	Outpatient	Psychosocial	0	0	0	1	0	0
780	Brands B, Blake J, Marsh D. Impact of methadone program philosophy changes on early treatment outcomes. Journal of addictive diseases. 2003;22(3):19.	Quantitative	2003	North America	English	Adult patients/clients with SUD accessing treatment	Opioids	Outpatient	Pharmacological + Psychosocial	1	1	1	0	0	0
788	Glazer SS, Galanter M, Megwinoff O, Dermatis H, Keller DS. The role of therapeutic alliance in network therapy: a family and peer support-based treatment for cocaine abuse. Substance abuse. 2003;24(2):93.	Quantitative	2003	North America	English	Adult patients/clients with SUD accessing treatment	Stimulants	Outpatient	Psychosocial	0	0	0	1	0	0
801	Norrish ME, Jooste K. Nursing care of the patient undergoing alcohol detoxification. Curationis. 2001;24(3):36.	Quantitative	2001	Africa	English	Adult patients/clients with SUD accessing treatment	Alcohol	Inpatient	Pharmacological	1	0	0	0	0	0
807	De Weert-Van Oene GH, Schippers GM, De Jong CA, Schrijvers GJ. Retention in substance dependence treatment: the relevance of in-treatment factors. Journal of substance abuse treatment. 2001;20(4):253.	Quantitative	2001	Europe	English	Adult patients/clients with SUD accessing treatment	People receiving addiction treatment in general	Inpatient	Psychosocial	0	0	0	1	0	0
826	Connors GJ, DiClemente CC, Dermen KH, Kadden R, Carroll KM, Frone MR. Predicting the therapeutic alliance in alcoholism treatment. Journal of studies on alcohol. 2000;61(1):139.	Quantitative	2000	North America	English	Adult patients/clients with SUD accessing treatment	Alcohol	Outpatient	Psychosocial	0	0	0	1	0	0
834	Raytek HS, McGrady BS, Epstein EE, Hirsch LS. Therapeutic alliance and the retention of couples in conjoint alcoholism treatment. Addictive behaviors. 1999;24(3):317.	Quantitative	1999	North America	English	Adult patients/clients with SUD accessing treatment	Alcohol	Outpatient	Psychosocial	0	0	0	1	0	0
836	Petry NM, Bickel WK. Therapeutic alliance and psychiatric severity as predictors of completion of treatment for opioid dependence. Psychiatric services (Washington, DC). 1999;50(2):219.	Quantitative	1999	North America	English	Adult patients/clients with SUD accessing treatment	Opioids	Outpatient	Pharmacological + Psychosocial	0	0	0	1	0	0
852	Connors GJ, Carroll KM, DiClemente CC, Longabaugh R, Donovan DM. The therapeutic alliance and its relationship to alcoholism treatment participation and outcome. Journal of consulting and clinical psychology. 1997;65(4):588.	Quantitative	1997	North America	English	Adult patients/clients with SUD accessing treatment	Alcohol	Outpatient	Psychosocial	0	0	0	1	0	0
854	Luborsky L, Barber JP, Siqueland L, McLellan AT, Woody G. Establishing a therapeutic alliance with substance abusers. NIDA research monograph. 1997;165:233.	Guideline	1997	North America	English	Health care providers in SUD treatment settings	People receiving addiction treatment in general	Outpatient	Psychosocial	0	0	0	1	0	0
855	Newman CF. Establishing and maintaining a therapeutic alliance with substance abuse patients: a cognitive therapy approach. NIDA research monograph. 1997;165:181.	Guideline	1997	North America	English	Health care providers in SUD treatment settings	People receiving addiction treatment in general	Outpatient	Psychosocial	0	1	0	1	0	0
856	Carroll KM, Nich C, Rounsaville BJ. Contribution of the therapeutic alliance to outcome in active versus control psychotherapies. Journal of consulting and clinical psychology. 1997;65(3):510.	Quantitative	1997	North America	English	Adult patients/clients with SUD accessing treatment	Stimulants	Outpatient	Pharmacological + Psychosocial	0	0	0	1	0	0
876	Miller WR, Benefield RG, Tonigan JS. Enhancing motivation for change in problem drinking: a controlled comparison of two therapist styles. Journal of consulting and clinical psychology. 1993;61(3):455.	Quantitative	1993	North America	English	Adult patients/clients with SUD accessing treatment	Alcohol	Outpatient	Psychosocial	0	0	0	1	0	0
883	Johnson TM, Fenton BJ, Kracht BR, Weiner MF, Guggenheim FG. Providing culturally sensitive care: intervention by a consultation-liaison team. Hospital & community psychiatry. 1988;39(2):200.	Report	1988	North America	English	Adult patients/clients with SUD accessing treatment	Alcohol	Inpatient	Psychosocial	0	0	0	0	0	1
1160	Ness O, Kvello O, Borg M, Semb R, Davidson L. "Sorting things out together": Young adults' experiences of collaborative practices in mental health and substance use care. American Journal of Psychiatric Rehabilitation. 2017;20(2):126.	Qualitative	2017	Europe	English	Adult patients/clients with SUD accessing treatment	Dual diagnosis	Outpatient	Psychosocial	0	0	1	1	0	0
1165	Cook S, Heather N, McCambridge J. The Role of the Working Alliance in Treatment for Alcohol Problems. Psychology of Addictive Behaviors. 2015;29(2):371.	Quantitative	2015	Europe	English	Adult patients/clients with SUD accessing treatment	Alcohol	Outpatient	Psychosocial	0	0	0	1	0	0
1311	Yang JA, Ashtari N, Kyupelyan L, Runyan AM. Treatment of an older adult with borderline personality disorder and prescription opioid abuse. Clinical Case Studies. 2016;15(3):212.	Report	2016	North America	English	Adult patients/clients with SUD accessing treatment	Dual diagnosis	Outpatient	Psychosocial	1	1	1	1	0	0
1555	Krampe H, Ehrenreich H. Therapeutic alliance and multiple psychotherapy in the context of therapist rotation: Experiences with OLITA. Neurology Psychiatry and Brain Research. 2012;18(4):137.	Report	2012	Europe	English	Adult patients/clients with SUD accessing treatment	Alcohol	Inpatient + Outpatient	Pharmacological + Psychosocial	1	0	1	1	0	0
1556	Mistler LA, Brunette MF, Ferron JC, Ziedonis DM. Shared decision making and behavioral support interventions for people with severe mental illness and tobacco dependence. Journal of Dual Diagnosis. 2012;8(2):99.	Review	2012	North America	English	Adult patients/clients with SUD accessing treatment	Tobacco	Outpatient	Psychosocial	0	0	1	0	0	0
1663	Morel A. Place of psychotherapy in therapeutic accompaniment in addictology. Theory and practice. Psychotropes. 2010;16(2):31.	Guideline	2010	Europe	French	Adult patients/clients with SUD accessing treatment	People receiving addiction treatment in general	Inpatient	Psychosocial	0	0	0	1	0	0
1708	Godlaski TM, Butler L, Heron M, Debord S, Cauvin L. A qualitative exploration of engagement among rural women entering substance user treatment. Substance Use and Misuse. 2009;44(1):62.	Qualitative	2009	North America	English	Adult patients/clients with SUD accessing treatment	People receiving addiction treatment in general	Outpatient	Psychosocial	0	0	0	1	0	0
1765	Krampe H, Stawicki S, Hoehe MR, Ehrenreich H. Outpatient Long-term Intensive Therapy for Alcoholics (OLITA): A successful biopsychosocial approach to the treatment of alcoholism. Dialogues in Clinical Neuroscience. 2007;9(4):399.	Quantitative	2007	Europe	English	Adult patients/clients with SUD accessing treatment	Alcohol	Inpatient + Outpatient	Pharmacological + Psychosocial	1	0	0	1	0	0
1835	Moyers TB, Miller WR, Hendrickson SML. How does motivational interviewing work? Therapist interpersonal skill predicts client involvement within motivational interviewing sessions. Journal of Consulting and Clinical Psychology. 2005;73(4):590.	Quantitative	2005	North America	English	Health care providers in SUD treatment settings	People receiving addiction treatment in general	Outpatient	Psychosocial	0	0	0	1	0	0
1854	Finkelstein N, Markoff LS. The Women Embracing Life and Living (WELL) Project: Using the relational model to develop integrated systems of care for women with alcohol/drug use and mental health disorders with histories of violence. Alcoholism Treatment Quarterly. 2004;22(3-4):63.	Report	2004	North America	English	Adult patients/clients with SUD accessing treatment	Dual diagnosis	Outpatient	Psychosocial	1	0	1	1	1	0
1928	Belding MA, Iguchi MY, Morral AR, McLellan AT. Assessing the helping alliance and its impact in the treatment of opiate dependence. Drug and Alcohol Dependence. 1997;48(1):51.	Quantitative	1997	North America	English	Adult patients/clients with SUD accessing treatment	Opioids	Outpatient	Pharmacological + Psychosocial	0	0	0	1	0	0
1930	Westreich LM, Rosenthal RN, Muran JC. A preliminary study of therapeutic alliance and dually diagnosed inpatients. American Journal on Addictions. 1996;5(1):81.	Quantitative	1996	North America	English	Adult patients/clients with SUD accessing treatment	Dual diagnosis	Inpatient	Not specified	0	0	0	1	0	0
2031	Vakharia S, P. , Little J. Starting where the client is: Harm reduction guidelines for clinical social work practice. Clinical Social Work Journal. 2017;45(1):65.	Guideline	2017	North America	English	Health care providers in SUD treatment settings	People receiving addiction treatment in general	Outpatient	Psychosocial	0	1	1	1	1	0
2071	Allen RS, Olson BD. The what and why of effective substance abuse treatment. International Journal of Mental Health and Addiction. 2016;14(5):715.	Qualitative	2016	North America	English	Adult patients/clients with SUD accessing treatment	People receiving addiction treatment in general	Inpatient + Outpatient	Psychosocial	0	0	0	1	0	0
2117	Abou-Saleh MT, Tarter RE, Salloum IM. Substance use disorders. Person centered psychiatry. 2016:325.	Guideline	2016	Europe	English	Health care providers in SUD treatment settings	People receiving addiction treatment in general	Outpatient	Not specified	1	1	1	0	0	0
2195	Davis TA, Ancis JR, Ashby JS. Therapist effects, working alliance, and African American women substance users. Cultural Diversity and Ethnic Minority Psychology. 2015;21(1):126.	Quantitative	2015	North America	English	Adult patients/clients with SUD accessing treatment	People receiving addiction treatment in general	Outpatient	Psychosocial	0	0	0	1	0	0
2200	Ness O, Borg M, Semb R, Karlsson B. 'Walking alongside:' Collaborative practices in mental health and substance use care. International Journal of Mental Health Systems. 2014;8.	Qualitative	2014	Europe	English	Health care providers in SUD treatment settings	Dual diagnosis	Outpatient	Psychosocial	0	0	1	1	0	0
2241	Stankiewicz Murphy L, Oros MT, Dorsey SG. The Baltimore Buprenorphine Initiative: Understanding the role of buprenorphine in addressing heroin addiction in an urban-based community. Journal of Addictions Nursing. 2014;25(1):16.	Report	2014	North America	English	Adult patients/clients with SUD accessing treatment	Opioids	Inpatient + Outpatient	Pharmacological + Psychosocial	0	1	0	0	0	0
2242	Kan LY, Henderson CE, von Sternberg K, Wang W. Does change in alliance impact alcohol treatment outcomes? Substance Abuse. 2014;35(1):37.	Quantitative	2014	North America	English	Adult patients/clients with SUD accessing treatment	Alcohol	Outpatient	Psychosocial	0	0	0	1	0	0
2292	Clarkson A, Harris N, Brazeau J, Brownlee K, Rawana E, Neckoway R. Initial therapeutic alliance and treatment engagement of Aboriginal and non-Aboriginal youths in a residential treatment center for substance abuse. Journal of Ethnic & Cultural Diversity in Social Work: Innovation in Theory, Research & Practice. 2013;22(2):145.	Quantitative	2013	North America	English	Youth patients/clients with SUD accessing treatment	People receiving addiction treatment in general	Inpatient	Psychosocial	0	0	0	1	0	0
2322	Knuuttila V, Kuusisto K, Saarnio P, Nummi T. Effect of early working alliance on retention in outpatient substance abuse treatment. Counselling Psychology Quarterly. 2012;25(4):361.	Quantitative	2012	Europe	English	Adult patients/clients with SUD accessing treatment	People receiving addiction treatment in general	Outpatient	Psychosocial	0	0	0	1	0	0
2323	Knuuttila V, Kuusisto K, Saarnio P, Nummi T. Early working alliance in outpatient substance abuse treatment: Predicting substance use frequency and client satisfaction. Clinical Psychologist. 2012;16(3):123.	Quantitative	2012	Europe	English	Adult patients/clients with SUD accessing treatment	People receiving addiction treatment in general	Outpatient	Psychosocial	0	0	0	1	0	0
2467	Sohler NL, Li X, Kunins HV, Sacajiu G, Giovanniello A, Whitley S, et al. Home- versus office-based buprenorphine inductions for opioid-dependent patients. Journal of Substance Abuse Treatment. 2010;38(2):153.	Quantitative	2010	North America	English	Adult patients/clients with SUD accessing treatment	Opioids	Outpatient	Pharmacological	0	0	1	0	0	0
2490	Crits-Christoph P, Gallop R, Temes CM, Woody G, Ball SA, Martino S, et al. The alliance in motivational enhancement therapy and counseling as usual for substance use problems. Journal of Consulting and Clinical Psychology. 2009;77(6):1125.	Quantitative	2009	North America	English	Adult patients/clients with SUD accessing treatment	People receiving addiction treatment in general	Outpatient	Psychosocial	0	0	0	1	0	0
2525	Lafave L, Desportes L, McBride C. Treatment outcomes and perceived benefits: A qualitative and quantitative assessment of a women's substance abuse treatment program. Women & Therapy. 2008;32(1):51.	Mixed-Methods	2008	North America	English	Adult patients/clients with SUD accessing treatment	People receiving addiction treatment in general	Outpatient	Psychosocial	1	1	1	1	0	0
2526	Wolff MC, Hayes JA. Therapist variables: Predictors of process in the treatment of alcohol and other drug problems. Alcoholism Treatment Quarterly. 2009;27(1):51.	Quantitative	2009	North America	English	Both health care providers and patients/clients	People receiving addiction treatment in general	Inpatient + Outpatient	Psychosocial	0	0	0	1	0	0
2546	Bethea AR, Acosta MC, Haller DL. Patient versus therapist alliance: Whose perception matters? Journal of Substance Abuse Treatment. 2008;35(2):174.	Quantitative	2008	North America	English	Adult patients/clients with SUD accessing treatment	Opioids	Outpatient	Pharmacological + Psychosocial	0	0	0	1	0	0
2549	Auerbach SM, May JC, Stevens M, Kiesler DJ. The interactive role of working alliance and counselor-client interpersonal behaviors in adolescent substance abuse treatment. International Journal of Clinical and Health Psychology. 2008;8(3):617.	Quantitative	2008	North America	English	Youth patients/clients with SUD accessing treatment	People receiving addiction treatment in general	Outpatient	Psychosocial	0	0	0	1	0	0
2601	Redko C, Rapp RC, Elms C, Snyder M, Carlson RG. Understanding the working alliance between persons with substance abuse problems and strengths-based case managers. Journal of Psychoactive Drugs. 2007;39(3):241.	Qualitative	2007	North America	English	Adult patients/clients with SUD accessing treatment	People receiving addiction treatment in general	Outpatient	Psychosocial	0	0	1	1	0	0
2603	Gatz M, Brown V, Hennigan K, Rechberger E, O'Keefe M, Rose T, et al. Effectiveness of an integrated, trauma-informed approach to treating women with co-occurring disorders and histories of trauma: The Los Angeles site experience. Journal of Community Psychology. 2007;35(7):863.	Quantitative	2007	North America	English	Adult patients/clients with SUD accessing treatment	Dual diagnosis	Inpatient + Outpatient	Psychosocial	0	0	0	0	1	0
2620	Kim TW, Samet JH, Cheng DM, Winter MR, Safran DG, Saitz R. Primary Care Quality and Addiction Severity: A Prospective Cohort Study. Health Services Research. 2007;42(2):755.	Quantitative	2007	North America	English	Adult patients/clients with SUD accessing treatment	Polysubstance	Inpatient + Outpatient	Not specified	1	0	0	1	0	0
2627	Kavanagh DJ, Connolly JM. Motivational interviewing. Clinical handbook of co-existing mental health and drug and alcohol problems. 2007:39.	Guideline	2007	Europe	English	Health care providers in SUD treatment settings	Dual diagnosis	Outpatient	Psychosocial	0	0	1	1	0	0
2669	Moerman M, McLeod J. Person-centered counseling for alcohol-related problems: The client's experience of self in the therapeutic relationship. Person-Centered and Experiential Psychotherapies. 2006;5(1):21.	Qualitative	2006	Europe	English	Adult patients/clients with SUD accessing treatment	Alcohol	Outpatient	Psychosocial	0	0	0	1	0	0
2676	Bryant-Jefferies R. A person centred approach to understanding and helping people with a dual diagnosis. Dual diagnosis nursing. 2006:240.	Guideline	2006	South America	English	Health care providers in SUD treatment settings	Dual diagnosis	Outpatient	Psychosocial	0	0	0	1	0	0
2677	Owens C, Springett J. The Roy Castle Fag ends stop smoking service: A successful client-led approach to smoking cessation. Journal of Smoking Cessation. 2006;1(1):13.	Report	2006	Europe	English	Adult patients/clients with SUD accessing treatment	Tobacco	Outpatient	Pharmacological + Psychosocial	0	1	1	1	0	0
2694	Wintersteen MB, Mensinger JL, Diamond GS. Do Gender and Racial Differences Between Patient and Therapist Affect Therapeutic Alliance and Treatment Retention in Adolescents? Professional Psychology: Research and Practice. 2005;36(4):400.	Quantitative	2005	North America	English	Youth patients/clients with SUD accessing treatment	Cannabis	Outpatient	Psychosocial	0	0	0	1	0	0
2697	Shelef K, Diamond GM, Diamond GS, Liddle HA. Adolescent and Parent Alliance and Treatment Outcome in Multidimensional Family Therapy. Journal of Consulting and Clinical Psychology. 2005;73(4):689.	Quantitative	2005	North America	English	Youth patients/clients with SUD accessing treatment	Cannabis	Outpatient	Psychosocial	0	0	0	1	0	0
2701	Tetzlaff BT, Kahn JH, Godley SH, Godley MD, Diamond GS, Funk RR. Working Alliance, Treatment Satisfaction, and Patterns of Posttreatment Use Among Adolescent Substance Users. Psychology of Addictive Behaviors. 2005;19(2):199.	Quantitative	2005	North America	English	Youth patients/clients with SUD accessing treatment	Cannabis	Outpatient	Psychosocial	0	0	0	1	0	0
2712	Miller SD, Mee-Lee D, Plum W, Hubble MA. Making Treatment Count: Client-Directed, Outcome-Informed Clinical Work with Problem Drinkers. Handbook of clinical family therapy. 2005:281.	Guideline	2005	North America	English	Adult patients/clients with SUD accessing treatment	Alcohol	Outpatient	Psychosocial	0	1	1	1	0	0
2746	Blankertz L, Magura S, Staines GL, Madison EM, Spinelli M, Horowitz E, et al. A New Work Placement Model for Unemployed Methadone Maintenance Patients. Substance Use & Misuse. 2004;39(13-14):2239.	Report	2004	North America	English	Adult patients/clients with SUD accessing treatment	Opioids	Outpatient	Pharmacological + Psychosocial	1	1	1	1	0	0
2781	Hammer G. Trust and relationship as cornerstones of successful psychotherapy. Harm reduction psychotherapy: A new treatment for drug and alcohol problems. 2002:106.	Guideline	2002	North America	English	Health care providers in SUD treatment settings	People receiving addiction treatment in general	Outpatient	Psychosocial	0	1	1	1	0	0
2793	Pichot T. Co-creating solutions for substance abuse. Journal of Systemic Therapies. 2001;20(2):1.	Report	2001	North America	English	Adult patients/clients with SUD accessing treatment	People receiving addiction treatment in general	Outpatient	Psychosocial	0	1	1	1	0	0
2825	Diamond GM, Liddle HA, Hogue A, Dakof GA. Alliance-building interventions with adolescents in family therapy: A process study. Psychotherapy: Theory, Research, Practice, Training. 1999;36(4):355.	Mixed-Methods	1999	North America	English	Youth patients/clients with SUD accessing treatment	People receiving addiction treatment in general	Outpatient	Psychosocial	0	1	0	1	0	0
2831	Barber JP, Luborsky L, Crits-Christoph P, E. Thase M, Weiss R, Frank A, et al. Therapeutic alliance as a predictor of outcome in treatment of cocaine dependence. Psychotherapy Research. 1999;9(1):54.	Quantitative	1999	North America	English	Adult patients/clients with SUD accessing treatment	Stimulants	Outpatient	Psychosocial	0	0	0	1	0	0
2863	Fisher DG, Lankford BA, Galea RP. Therapeutic community retention among Alaska Natives: Akeela House. Journal of Substance Abuse Treatment. 1996;13(3):265.	Quantitative	1996	North America	English	Adult patients/clients with SUD accessing treatment	People receiving addiction treatment in general	Inpatient	Psychosocial	0	0	0	0	0	1
2900	Van Bilsen HP, Van Emst AJ. Heroin addiction and motivational milieu therapy. International Journal of the Addictions. 1986;21(6):707.	Report	1986	Europe	English	Adult patients/clients with SUD accessing treatment	Opioids	Outpatient	Pharmacological + Psychosocial	0	1	1	1	0	0
3014	Zweben J, E. , Moses Y, Cohen JB, Price G, Chapman W, Lamb J. Enhancing Family Protective Factors in Residential Treatment for Substance Use Disorders. Child Welfare. 2015;94(5):145	Report	2015	North America	English	Adult patients/clients with SUD accessing treatment	People receiving addiction treatment in general	Inpatient	Psychosocial	1	0	0	0	1	0
3181	Van Horn DHA, Drapkin M, Lynch KG, Rennert L, Goodman JD, Thomas T, et al. Treatment choices and subsequent attendance by substance-dependent patients who disengage from intensive outpatient treatment. Addiction Research & Theory. 2015;23(5):391.	Quantitative	2015	North America	English	Adult patients/clients with SUD accessing treatment	Polysubstance	Outpatient	Pharmacological + Psychosocial	0	1	1	0	0	0
3200	Hillen P, Cree VE, Jain S. Facilitating Recovery from Drug and Alcohol Problems — Reflections on Interviews with Service Users in Scotland. Practice (09503153). 2014;26(5):281.	Qualitative	2014	Europe	English	Adult patients/clients with SUD accessing treatment	People receiving addiction treatment in general	Outpatient	Psychosocial	1	0	0	1	0	0
3242	Warner DO, LeBlanc A, Kadimpati S, Vickers KS, Shi Y, Montori VM, et al. Decision Aid for Cigarette Smokers Scheduled for Elective Surgery. Anesthesiology. 2015;123(1):18.	Quantitative	2015	North America	English	Adult patients/clients with SUD accessing treatment	Tobacco	Inpatient + Outpatient	Psychosocial	0	0	1	0	0	0
3244	Rogers N, Lubman DI, Allen NB. Therapeutic alliance and change in psychiatric symptoms in adolescents and young adults receiving drug treatment. Journal of Substance Use. 2008;13(5):325.	Quantitative	2008	Australia	English	Youth patients/clients with SUD accessing treatment	People receiving addiction treatment in general	Outpatient	Psychosocial	0	0	0	1	0	0
3251	McMahon J. Hard to reach and impossible to help: working at the rough end of social care. Journal of Social Work Practice. 2009;23(3):275.	Report	2009	Europe	English	Adult patients/clients with SUD accessing treatment	Dual diagnosis	Outpatient	Psychosocial	0	0	0	1	0	0
3439	Senn S, Needham I, Antille S. The association between the patient-nurse working alliance and the perception of the substance use control in an addiction therapy setting: a descriptive correlation study. Recherche en Soins Infirmiers. 2012(108):30.	Quantitative	2012	Europe	French	Adult patients/clients with SUD accessing treatment	People receiving addiction treatment in general	Inpatient	Not specified	0	0	0	1	0	0
3447	Schiff M, Levit S. Correlates of therapeutic alliance and treatment outcomes among Israeli female methadone patients. Research on Social Work Practice. 2010;20(4):380.	Quantitative	2010	Asia	English	Adult patients/clients with SUD accessing treatment	Opioids	Outpatient	Pharmacological + Psychosocial	0	0	0	1	0	0
3635	Abrahamsson A, Springett J, Karlsson L, Håkansson A, Ottosson T. Some lessons from Swedish midwives' experiences of approaching women smokers in antenatal care. Midwifery. 2005;21(4):335.	Qualitative	2005	Europe	English	Health care providers in SUD treatment settings	People receiving addiction treatment in general	Outpatient	Psychosocial	0	0	1	1	0	0
3678	Browne AJ, Shultis JD, Thio-Watts M. Solution-focused approaches to tobacco reduction with disadvantaged prenatal clients. Journal of Community Health Nursing. 1999;16(3):165.	Report	1999	North America	English	Adult patients/clients with SUD accessing treatment	Tobacco	Outpatient	Psychosocial	1	1	0	0	0	0
3701	Tanney MR, Lowenstein V. One-stop shopping: description of a model program to provide primary care to substance-abusing women and their children. Journal of Pediatric Healthcare. 1997;11(1):20.	Report	1997	North America	English	Adult patients/clients with SUD accessing treatment	People receiving addiction treatment in general	Outpatient	Psychosocial	1	1	0	0	0	0
3938	Van Hout MC, Bingham T. A Qualitative Study of Prescribing Doctor Experiences of Methadone Maintenance Treatment. International Journal of Mental Health and Addiction. 2014;12(3):227-42.	Qualitative	2014	Europe	English	Health care providers in SUD treatment settings	Opioids	Outpatient	Pharmacological	0	0	0	1	0	0
4004	Shin HC, Marsh JC, Cao DC, Andrews CM. Client-Provider relationship in comprehensive substance abuse treatment: Differences in residential and nonresidential settings. Journal of Substance Abuse Treatment. 2011;41(4):335-46.	Quantitative	2011	North America	English	Adult patients/clients with SUD accessing treatment	People receiving addiction treatment in general	Inpatient + Outpatient	Pharmacological + Psychosocial	1	1	0	1	0	0
4006	Shier ML, Turpin A. A Multi-Dimensional Conceptual Framework for Trauma-Informed Practice in Addictions Programming. Journal of Social Service Research. 2017;43(5):609-23.	Qualitative	2017	North America	English	Adult patients/clients with SUD accessing treatment	People receiving addiction treatment in general	Inpatient	Psychosocial	0	0	0	0	1	0
4081	Pullmann MD, Ague S, Johnson T, Lane S, Beaver K, Jetton E, et al. Defining Engagement in Adolescent Substance Abuse Treatment. American Journal of Community Psychology. 2013;52(3-4):347-58.	Qualitative	2013	North America	English	Health care providers in SUD treatment settings	People receiving addiction treatment in general	Outpatient	Psychosocial	0	0	1	1	0	0
4129	O' Sullivan GA, Hanlon C, Dentry T, Morris T, Banting L. A qualitative exploration of the client experience of inter-professional practice in the delivery of ActivePlus: a combined smoking cessation and physical activity intervention. Bmc Health Services Research. 2018;18:11.	Qualitative	2018	Australia	English	Adult patients/clients with SUD accessing treatment	Tobacco	Outpatient	Psychosocial	0	0	1	1	0	0
4585	Chorlton E, Smith I, Jones SA. Understanding how people who use illicit drugs and alcohol experience relationships with psychiatric inpatient staff. Social Psychiatry and Psychiatric Epidemiology. 2015;50(1):51-8.	Qualitative	2015	Europe	English	Adult patients/clients with SUD accessing treatment	Dual diagnosis	Inpatient	Not specified	0	0	0	1	0	0
4654	Bobb JF, Lee AK, Lapham GT, Oliver M, Ludman E, Achtmeyer C, et al. Evaluation of a Pilot Implementation to Integrate Alcohol-Related Care within Primary Care. International Journal of Environmental Research and Public Health. 2017;14(9):18.	Report	2017	North America	English	Adult patients/clients with SUD accessing treatment	Alcohol	Outpatient	Psychosocial	0	1	1	0	0	0
4710	Andersson HW, Otterholt E, Grawe RW. Patient satisfaction with treatments and outcomes in residential addiction institutions. Nordic Studies on Alcohol and Drugs. 2017;34(5):375-84.	Quantitative	2017	Europe	English	Adult patients/clients with SUD accessing treatment	People receiving addiction treatment in general	Inpatient	Psychosocial	0	0	1	0	0	0
4722	Ahrens MP. A model for dual disorder treatment in acute psychiatry in a VA population. Journal of Substance Abuse Treatment. 1998;15(2):107-12.	Report	1998	North America	English	Adult patients/clients with SUD accessing treatment	Dual diagnosis	Inpatient	Psychosocial	1	0	1	0	0	0
4737	British Columbia Centre on Substance Use. Treatment of Opioid Use Disorder During Pregnancy-Guideline Supplement. 2018.	Guideline	2018	North America	English	Health care providers in SUD treatment settings	Opioids	Inpatient + Outpatient	Pharmacological + Psychosocial	1	0	1	1	1	0
4744	Registered Nurses Association of Ontario. Engaging Clients Who Use Substances. 2015.	Guideline	2015	North America	English	Health care providers in SUD treatment settings	People receiving addiction treatment in general	Inpatient + Outpatient	Not specified	1	1	1	0	0	0
4751	Registered Nurses Association of Ontario. Supporting Clients on Methadone Maintenance Treatment. 2009.	Guideline	2009	North America	English	Health care providers in SUD treatment settings	Opioids	Outpatient	Pharmacological	1	1	1	1	0	1
4752	Registered Nurses Association of Ontario. Implementing Supervised Injection Services. 2018.	Guideline	2018	North America	English	Health care providers in SUD treatment settings	Opioids	Outpatient	Psychosocial	1	0	1	1	1	1
4753	Registered Nurses Association of Ontario. Integrating Tobacco Interventions into Daily Practice. 2017.	Guideline	2017	North America	English	Health care providers in SUD treatment settings	Tobacco	Inpatient + Outpatient	Not specified	0	1	0	0	0	0
